# Supplementary material for: Charting the coordinative landscape of the 18F–Sc/44Sc/177Lu triad with the tri-aza-cyclononane (tacn) scaffold
Source: Royal Society of Chemistry journal article supplement (doi:10.1039/d4sc04735d), 2024-01-01
Supplement: d4sc04735d1.pdf [file d4sc04735d1.pdf]

## Supporting Information for: Charting the Coordinative Landscape of the $^{18}\text{F}$ - $\text{Sc}/^{44}\text{Sc}/^{177}\text{Lu}$ triad with the Tri-aza-cyclononane (tacn) Scaffold

Cormac A. A. Kelderman<sup>a,b</sup>, Owen M. Glaser<sup>a,b</sup>, Jennifer N. Whetter<sup>a,b</sup>, Eduardo Aluicio-Sarduy<sup>c</sup>, Jason C. Mixdorf<sup>e</sup>, Kyana M. Sanders<sup>a</sup>, Ilia A. Guzei<sup>a</sup>, Todd E. Barnhart<sup>c</sup>, Jonathan W. Engle<sup>c</sup>, Eszter Boros<sup>a,b\*</sup>

<sup>a</sup> Department of Chemistry, University of Wisconsin-Madison, Madison, Wisconsin 53706, United States of America

<sup>b</sup> Department of Chemistry, Stony Brook University, Stony Brook, New York 11790, United States of America

<sup>c</sup> Medical Physics Department, University of Wisconsin-Madison, 1111 Highland Avenue, Madison, Wisconsin 53705, USA

### Table of Contents

|                                                                                               |     |
|-----------------------------------------------------------------------------------------------|-----|
| Abbreviations.....                                                                            | 3   |
| 1 Experimental procedures.....                                                                | 5   |
| 1.1 General methods.....                                                                      | 5   |
| 1.2 Ligand Synthesis.....                                                                     | 7   |
| 1.2.1 General Alkylation Procedure.....                                                       | 8   |
| 1.3 Synthesis and characterization of coordination complexes.....                             | 15  |
| 1.3.1 General Scandium Complexation Procedure.....                                            | 15  |
| 1.3.2 General Fluorination Procedure.....                                                     | 22  |
| 1.4 Ultraviolet-Visible Spectroscopy Data.....                                                | 26  |
| 1.5 Computational Chemistry.....                                                              | 34  |
| 1.6 Chiral Separation.....                                                                    | 37  |
| 1.7 Radiolabeling Data.....                                                                   | 38  |
| 1.7.1 General $^{18}\text{F}$ Radiolabeling Procedure.....                                    | 38  |
| 1.7.2 General $^{44}\text{Sc}/^{177}\text{Lu}$ Radiolabeling Procedure.....                   | 38  |
| 1.7.3 $^{44}\text{Sc}/^{177}\text{Lu}$ Animal Studies Radiolabeling Procedure.....            | 38  |
| 1.7.4 Metabolite Analysis.....                                                                | 38  |
| 1.7.5 HPLC Chromatograms.....                                                                 | 45  |
| 1.8 Speciation Studies.....                                                                   | 53  |
| 1.8.1 Speciation of $\text{H}_2\text{L}^{111}$ .....                                          | 53  |
| 1.8.2 Speciation of $[\text{Sc}(\text{L}^{111})]^+$ and $[\text{Lu}(\text{L}^{111})]^+$ ..... | 55  |
| 2 Ligand and Complex Characterization Data.....                                               | 58  |
| 2.1 NMR Characterization.....                                                                 | 58  |
| 2.2 HRMS.....                                                                                 | 151 |
| 3 X-Ray Diffraction Analysis.....                                                             | 172 |
| 3.1 Data collection.....                                                                      | 172 |
| 3.2 Structure Solution and Refinement.....                                                    | 172 |
| 3.3 Crystal Data Summary.....                                                                 | 172 |
| 4 DFT Atomic Coordinates.....                                                                 | 184 |
| 5 References.....                                                                             | 262 |

## Abbreviations

|                |                                                            |
|----------------|------------------------------------------------------------|
| Ac             | Acetate                                                    |
| AcN            | Acetonitrile                                               |
| API-ES         | Atmospheric Pressure Ionization - Electrospray             |
| Ar             | Aromatic                                                   |
| Ar(Bz)         | Aromatic Benzyl                                            |
| Ar(Pa)         | Aromatic Picolinic Acid                                    |
| Asc            | Ascorbate                                                  |
| Bz             | Benzyl                                                     |
| CV             | Column Volume                                              |
| DCM            | Dichloromethane                                            |
| DFT            | Density Functional Theory                                  |
| DIPEA          | N,N-diisopropylethylamine                                  |
| DMAP           | 4-dimethylaminopyridine                                    |
| DMEM           | Dulbecco's Modified Eagle Medium                           |
| DMF            | Dimethylformamide                                          |
| DMSO           | Dimethyl sulfoxide                                         |
| ESI            | Electrospray Ionization                                    |
| EtOAc          | Ethyl Acetate                                              |
| FBS            | Fetal Bovine Serum                                         |
| HEPES          | 2-[4-(2-hydroxyethyl)piperazin-1-yl]ethanesulfonic acid    |
| HPLC           | High Performance Liquid Chromatography                     |
| HR             | High Resolution                                            |
| Hz             | Hertz                                                      |
| ICP-OES        | Inductively Coupled Plasma - Optical Emission Spectroscopy |
| IS             | Internal Standard                                          |
| LC             | Liquid Chromatography                                      |
| LR             | Low Resolution                                             |
| MeCN           | Acetonitrile                                               |
| MeOH           | Methanol                                                   |
| MS             | Mass Spectrometry                                          |
| NMR            | Nuclear Magnetic Resonance                                 |
| PBS            | Phosphate Buffered Saline                                  |
| PVDF           | Polyvinylidene Fluoride                                    |
| QTAIM          | Quantum Theory of Atoms in Molecules                       |
| RCY            | Radiochemical Yield                                        |
| RMSD           | Root Mean Square Deviation                                 |
| RT             | Room Temperature                                           |
| R <sub>t</sub> | Retention time                                             |
| SD             | Standard Deviation                                         |



|      |                           |
|------|---------------------------|
| TACN | Triazacyclononane         |
| TEA  | Triethylamine             |
| TFA  | Trifluoroacetic acid      |
| THF  | Tetrahydrofuran           |
| TLC  | Thin Layer Chromatography |
| TOF  | Time of Flight            |

## 1 Experimental procedures

### 1.1 General methods

All starting materials were purchased from commercial sources and used without further purification.  $^{18}\text{F}$  and  $^{44}\text{Sc}$  was received from the University of Wisconsin-Madison Cyclotron Lab (GE PETtrace cyclotron), and  $^{177}\text{Lu}$  was received from the DOE isotope program, produced at the University of Missouri Research Reactor.

**NMR spectra ( $^1\text{H}$ ,  $^{13}\text{C}\{^1\text{H}\}$ ,  $^{19}\text{F}$ ,  $^{45}\text{Sc}$ , COSY, HSQC and HMBC)** were collected at Stony Brook University on a 400, 500, or 700 MHz III Bruker instrument at 25 °C and processed using TopSpin 4.0.9. and at the University of Wisconsin-Madison Department of Chemistry Paul Bender Chemical Instrumentation Center (CIC) using a Bruker Avance III 500 with a DCH liquid He cryoprobe (Bender Fund), a Bruker Avance Neo 500 with a 5mm Prodigy-BBO liquid  $\text{N}_2$  cryoprobe (NSF CHE-2017891), or a Bruker Avance III 600 with a TCI-F liquid He cryoprobe (NIH S10 OD012245). Data was processed using MestReNova 14.3.3-33362. Chemical shifts ( $\delta$ ) are reported in parts per million (ppm) relative to tetramethylsilane.  $^1\text{H}$ ,  $^{13}\text{C}\{^1\text{H}\}$ , COSY, HSQC and HMBC NMR spectra are referenced to residual solvent signals,  $^{45}\text{Sc}$  NMR spectra are referenced in MestReNova using a  $^1\text{H}$  NMR spectra as an absolute reference.

**High resolution ESI mass spectrometry** were carried out at the Stony Brook University Center for Advanced Study of Drug Action (CASDA) with a Bruker Impact II UHR QTOF MS system, and at the University of Wisconsin-Madison Department of Chemistry Paul Bender Chemical Instrumentation Center (CIC) using a Thermo Scientific Q Exactive Focus Orbitrap MS system, and at the University of Wisconsin-Madison School of Pharmacy Analytical Instrumentation Cluster using a Bruker MaXis Ultra-High Resolution Quadrupole Time-of-Flight MS system.

**Ultraviolet-visible spectra** were collected with the NanoDrop 1C instrument (AZY1706045). Spectra were recorded from 190 to 850 nm in a quartz cuvette with 1 cm path length. Copper titration and molar extinction measurements were made in sodium acetate buffer (10 mM, pH 5.5).

**ICP-OES and MP-AES analyses** were carried out using an Agilent 5110 inductively coupled plasma optical emission spectrometer and an Agilent 4210 microwave plasma atomic emission spectrometer, respectively. For both techniques, a 6-point standard curve (1-100 ppm) with respect to scandium, lutetium, or copper was used and fits were found to be  $R^2 > 0.99$ .

**Analytical- and radio-HPLC methods** were carried out using a Shimadzu HPLC-20AR equipped with a binary gradient pump, UV-vis detector, autoinjector, or an Agilent 1260 Infinity II system. Both instruments were set to detect UV absorption was recorded at 220 nm and 254 nm and were coupled to an in-line LabLogic Dual Scan-RAM detector and were controlled using the LabLogic Laura software package. RadioHPLC analyses utilised a LabLogic 1" NaI photomultiplier tube detector with 2" lead shielding and radioTLC analyses utilised a LabLogic plastic photomultiplier tube detector.

**Semipreparative HPLC** was carried out using a Shimadzu HPLC-20AR equipped with a binary gradient pump, UV-vis detector, and manual injector. UV absorption was recorded at 220 and 254 nm.

**Flash chromatography** was carried out using a Combi Flash Rf+ system with UV detection at 220 and 254 nm.

**Liquid chromatography mass spectrometry (LCMS)** was carried out on a Phenomenex Luna C18 column (5  $\mu\text{m}$ , 150 mm  $\times$  3 mm, 100 Å, AXIA packed) at a flow rate of 0.8 mL/min using a single quadrupole Agilent 1200 Infinity II LC/MSD system equipped with a binary gradient pump,

UV- vis detector, automatic injector, and an atmospheric pressure electrospray ionization (AP-ESI) source. Ultraviolet absorption was recorded at 220 nm and 254 nm, and positive and negative mass spectra were collected from  $m/z = 100-1000$ .

#### **Chromatography Solvent Systems:**

Analytical HPLC - Method A: binary solvent system (A: water + 0.1% TFA; B: MeCN + 0.1% TFA); gradient (0–2 min: 5% B; 2–14 min: 5–95% B; 14–16 min: 95% B; 16–16.5 min: 95–5% B; 16.5–20 min 5% B); flow rate: 0.8 mL/min; column: Phenomenex Luna C18 column (5  $\mu\text{m}$ , 150 mm  $\times$  3 mm, 100  $\text{\AA}$ , AXIA packed).

Analytical HPLC - Method B: binary solvent system (A: water + 0.1% TFA; B: MeCN + 0.1% TFA); gradient (0–2 min: 0% B; 2–14 min: 0–90% B; 14–16 min: 90% B; 16–16.5 min: 90–0% B; 16.5–20 min 0% B); flow rate: 1.0 mL/min; temperature: 50  $^{\circ}\text{C}$ ; column: Restek Ultra AQ C18 column (5  $\mu\text{m}$ , 250 mm  $\times$  3 mm).

Analytical HPLC - Method C: binary solvent system (A: 10 mM ammonium formate pH 9.0; B: MeCN); gradient (0–2 min: 0% B; 2–14 min: 0–90% B; 14–16 min: 90% B; 16–16.5 min: 90–0% B; 16.5–20 min 0% B); flow rate: 1.0 mL/min; temperature: 50  $^{\circ}\text{C}$ ; column: Restek Ultra AQ C18 column (5  $\mu\text{m}$ , 250 mm  $\times$  3 mm).

Analytical HPLC - Method D: binary solvent system (A: 10 mM ammonium formate pH 4.0; B: MeCN); gradient (0–2 min: 0% B; 2–14 min: 0–90% B; 14–16 min: 90% B; 16–16.5 min: 90–0% B; 16.5–20 min 0% B); flow rate: 1.0 mL/min; temperature: 50  $^{\circ}\text{C}$ ; column: Restek Ultra AQ C18 column (5  $\mu\text{m}$ , 250 mm  $\times$  3 mm).

Analytical HPLC – Method E: single solvent system (A: MeOH); no gradient; flow rate: 0.25 mL/min; column: CHIRALPAK IE-3 (4.6x50mm, 3mi).

Semipreparative HPLC - Method F: binary solvent system (A: water + 0.1% TFA; B: MeCN + 0.1% TFA); gradient: (0–1 min: 5% B; 1–14 min: 5–50% B; 14–23 min: 50–95% B; 23–26 min: 95% B; 26–27 min: 95–5% B; 27–30 min: 5% B); flow rate: 15 mL/min; column: Phenomenex Luna C18 column (250 mm  $\times$  21.2 mm, 100  $\text{\AA}$ , AXIA packed).

Flash chromatography - Method G: Binary solvent system (A: water + 0.1% TFA; B: MeCN + 0.1% TFA); flow rate: 60 mL/min; column: RediSep C18 column (100 g HP gold).

LCMS - Method H: binary solvent system (A: water + 0.1% FA; B: MeCN + 0.1% FA); gradient (0-3 min: 5% B; 3-10 min: 5-95% B; 10-13 min: 95% B; 13-13.5 min: 95-5% B; 13.5-16 min: 5% B); flow rate: 0.8 mL/min; column: Phenomenex Luna C18 column (5  $\mu\text{m}$ , 150 mm  $\times$  3 mm, 100  $\text{\AA}$ , AXIA packed).

**In vivo biodistribution in naïve BALB/C mice models.** Animal experiments were conducted with the approval of the University of Wisconsin-Madison Institutional Animal Care and Use Committee (IACUC). All studies were conducted in accordance with the relevant guidelines and regulations. BALB/C mice were purchased from Jackson Laboratory.

## 1.2 Ligand Synthesis

*Ethyl 6-(hydroxymethyl)picolinate, 1.* To a solution of diethyl-2,6-pyridinedicarboxylate (10.00 g, 44.80 mmol, 1 equiv.) in ethanol (200 mL) at 0 °C was added sodium borohydride (4.07 g, 107.51 mmol, 2.4 equiv.) in 4 portions over 1 h. After an additional 4 h at 0 °C, the reaction was quenched with acetone (150 mL) and the solvent was removed under reduced pressure. The residue was dissolved in water (100 mL) and extracted with dichloromethane (3 x 50 mL). The organic phase was dried over sodium sulfate and the solvent was removed under reduced pressure to give the desired product as a clear pale yellow oil that rapidly crystallized (6.28 g, 34.68 mmol, 77%). <sup>1</sup>H NMR (500 MHz, MeOD) δ 8.04 – 7.94 (m, 2H, Ar(Pa)), 7.79 – 7.73 (m, 1H, Ar(Pa)), 4.76 (s, 2H, CH<sub>2</sub>OH), 4.43 (q, *J* = 7.1 Hz, 2H, CH<sub>2</sub>CH<sub>3</sub>), 1.41 (t, *J* = 7.1 Hz, 3H, CH<sub>3</sub>). <sup>13</sup>C {<sup>1</sup>H} NMR (126 MHz, MeOD) δ 166.3 (COOEt), 163.4 (C CH<sub>2</sub>OH), 148.2 (CCOOEt), 139.5 (Ar(Pa)), 125.3 (Ar(Pa)), 124.5 (Ar(Pa)), 65.3 (CH<sub>2</sub>OH), 62.9 (CH<sub>2</sub>CH<sub>3</sub>), 14.5 (CH<sub>3</sub>). ESI-HRMS (+ve ion): [1+H]<sup>+</sup> *m/z* = 182.0812 (experimental); 182.0812 (calculated).

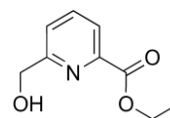

*Ethyl 6-(bromomethyl)picolinate, 2.* To a solution of ethyl 6-(bromomethyl)picolinate (5.76 g, 31.79 mmol, 1 equiv.) in chloroform (300 mL) at 0 °C was slowly added phosphorus tribromide (12.91 g, 47.68 mmol, 1.5 equiv.). After 1 h at 0 °C, the reaction was quenched with saturated aqueous sodium bicarbonate (100 mL) and mixture was extracted with dichloromethane (3 x 50 mL). The organic phase was dried over sodium sulfate and the solvent was removed under reduced pressure to give the desired product as a dark red oil (5.63 g, 23.07 mmol, 73%). <sup>1</sup>H NMR (500 MHz, MeOD) δ 8.06 (dd, *J* = 7.8, 1.2 Hz, 1H, Ar(Pa)), 8.01 (t, *J* = 7.8 Hz, 1H, Ar(Pa)), 7.79 (dd, *J* = 7.7, 1.1 Hz, 1H, Ar(Pa)), 4.68 (s, 2H, CH<sub>2</sub>OH), 4.45 (q, *J* = 7.1 Hz, 2H, CH<sub>2</sub>CH<sub>3</sub>), 1.43 (t, *J* = 7.1 Hz, 3H, CH<sub>3</sub>). <sup>13</sup>C {<sup>1</sup>H} NMR (126 MHz, MeOD) δ 165.8 (COOEt), 159.2 (C CH<sub>2</sub>Br), 148.7 (CCOOEt), 140.3 (Ar(Pa)), 128.7 (Ar(Pa)), 125.4 (Ar(Pa)), 63.1 (CH<sub>2</sub>CH<sub>3</sub>), 32.9 (CH<sub>2</sub>Br), 14.5 (CH<sub>3</sub>). ESI-HRMS (+ve ion): [2+H]<sup>+</sup> *m/z* = 243.9969 (experimental); 243.9968 (calculated) and 245.9948 (experimental); 245.9948 (calculated). HPLC: R<sub>t</sub> = 9.60 min (Method A).

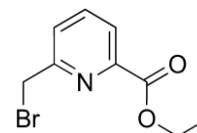

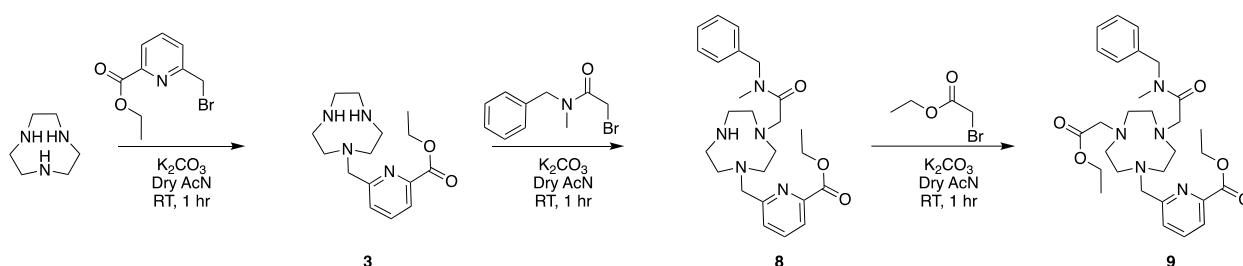

**Scheme S1:** General alkylation procedure.

### 1.2.1 General Alkylation Procedure

To a solution of the secondary amine and potassium carbonate in dry acetonitrile at 0 °C was added slowly the corresponding alkyl bromide as a solution in an equivalent volume of dry acetonitrile under N<sub>2</sub>. After 1 h at 0 °C, the reaction mixture was filtered and the solvent was removed under reduced pressure. The resultant crude mixture was dissolved in acetonitrile/water (1:1) and the desired product(s) was isolated using either flash chromatography (Method C) or semi-preparative HPLC (Method B) in sufficient purity to use in following reactions. Example stoichiometry/reactants: 1,4,7-Triazacyclononane (1.00 g, 7.74 mmol, 3 equiv.); potassium carbonate (1.07 g, 7.74 mmol, 3 equiv.); ethyl 6-(bromomethyl)picolinate (0.63 g, 2.58 mmol, 1 equiv.); dry acetonitrile (40 mL). Products: **3** (457 mg, 1.55 mmol, 60%); **4** (131 mg, 0.288 mmol, 11%); **5** (15 mg, 0.024 mmol, 0.9%).

*Ethyl 6-((1,4,7-triazonan-1-yl)methyl)picolinate, 3.* <sup>1</sup>H NMR (600 MHz, MeOD) δ = 8.12 (dd, *J* = 7.7, 1.1 Hz, 1H, Ar(Pa)), 8.05 (t, *J* = 7.8 Hz, 1H, Ar(Pa)), 7.61 (dd, *J* = 7.9, 1.0 Hz, 1H, Ar(Pa)), 4.50 (q, *J* = 7.1 Hz, 2H, CH<sub>2</sub> ethyl), 4.26 (s, 2H, CH<sub>2</sub> pic), 4.22 – 3.50 (m, 2H, tacn), 3.37 (t, *J* = 5.7 Hz, 4H, tacn), 3.28 – 2.89 (m, 6H, tacn), 1.44 (t, *J* = 7.2 Hz, 3H, CH<sub>3</sub> ethyl). <sup>13</sup>C {<sup>1</sup>H} NMR (151 MHz, MeOD) δ 166.5 (COOEt), 161.2 (CCH<sub>2</sub>N), 147.8 (CCOOEt), 140.6 (Ar(Pa)), 128.0 (Ar(Pa)), 125.3 (Ar(Pa)), 63.6 (CH<sub>2</sub> ethyl), 58.5 (CH<sub>2</sub> pic), 51.2 (tacn), 47.0 (tacn), 46.1 (tacn), 14.5 (CH<sub>3</sub> ethyl). ESI-HRMS (+ve ion): [**3**+H]<sup>+</sup> *m/z* = 293.1973 (experimental); 293.1972 (calculated). HPLC: R<sub>t</sub> = 5.58 min (Method A).

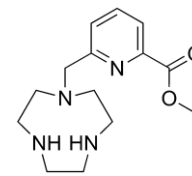

*Diethyl 6,6'-((1,4,7-triazonane-1,4-diyl)bis(methylene))dipicolinate, 4.* <sup>1</sup>H NMR (500 MHz, MeOD) δ 7.98 – 7.91 (m, 4H, Ar(Pa)), 7.62 – 7.54 (m, 2H, Ar(Pa)), 4.58 (s, 4H, CH<sub>2</sub>(Pa)), 4.33 (q, *J* = 7.1 Hz, 4H, CH<sub>2</sub> ethyl), 3.80 – 3.53 (m, 12H, tacn), 1.35 (t, *J* = 7.1 Hz, 6H, CH<sub>3</sub>). <sup>13</sup>C {<sup>1</sup>H} NMR (126 MHz, MeOD) δ 165.9 (CO), 163.3 (CCH<sub>2</sub>N), 147.8 (CCOOEt), 140.1 (Ar(Pa)), 127.9 (Ar(Pa)), 125.5 (Ar(Pa)), 63.3 (CH<sub>2</sub> ethyl), 60.9 (CH<sub>2</sub>(Pa)), 54.1 (tacn), 53.1 (tacn), 45.9 (tacn), 14.5 (CH<sub>3</sub>). ESI-HRMS (+ve ion): [**4**+H]<sup>+</sup> *m/z* = 456.2606 (experimental); 456.2605 (calculated). HPLC: R<sub>t</sub> = 6.92 min (Method A).

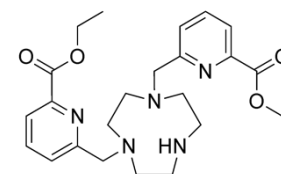

triethyl 6,6',6''-((1,4,7-triazonane-1,4,7-triyl)tris(methylene))tripicolinate, **5**:  $^1\text{H}$  NMR (500 MHz, MeOD)  $\delta$  7.90 (t,  $J = 7.8$  Hz, 3H, Ar(Pa)), 7.80 (d,  $J = 7.7$  Hz, 3H, Ar(Pa)), 7.57 (d,  $J = 7.9$  Hz, 3H, Ar(Pa)), 4.72 (s, 6H,  $\text{CH}_2(\text{Pa})$ ), 4.25 (q,  $J = 7.1$  Hz, 6H,  $\text{CH}_2 \text{CH}_3$ ), 4.19 – 3.66 (m, 12H, tacn), 1.30 (t,  $J = 7.1$  Hz, 9H,  $\text{CH}_3$ ).  $^{13}\text{C}\{^1\text{H}\}$  NMR (126 MHz, MeOD)  $\delta$  165.6 (COOEt), 156.1 ( $\text{CCH}_2\text{N}$ ), 147.6 (CCOOEt), 139.9 (Ar(Pa)), 127.8 (Ar(Pa)), 125.6 (Ar(Pa)), 63.2 ( $\text{CH}_2\text{CH}_3$ ), 61.5 ( $\text{CH}_2 \text{Pa}$ ), 54.3 (tacn), 14.5 ( $\text{CH}_3$ ). ESI-HRMS (+ve ion):  $[\mathbf{5}+\text{H}]^+ m/z = 619.3239$  (experimental); 619.3239 (calculated). HPLC:  $R_t = 7.98$  min (Method A).

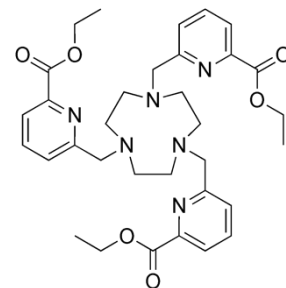

**6/7/L<sup>030</sup>**: Sample reaction stoichiometry: 1,4,7-Triazacyclononane (1.00 g, 7.74 mmol, 3 equiv.); potassium carbonate (1.07 g, 7.74 mmol, 3 equiv.); *N*-benzyl-2-bromo-*N*-methylacetamide (0.62 g, 2.58 mmol, 1 equiv.); dry acetonitrile (40 mL). Products: **6** (808 mg); **7** (222 mg); **L<sup>030</sup>** (47 mg).

*N*-benzyl-*N*-methyl-2-(1,4,7-triazonane-1-yl)acetamide:  $^1\text{H}$  NMR (500 MHz, MeOD)  $\delta$  7.43 – 7.22 (m, 5H, Ar(Bz)), 4.66 – 4.54 (m, 2H,  $\text{CH}_2(\text{Bz})$ ), 3.84 – 3.79 (m, 2H,  $\text{CH}_2 \text{Ac}$ ), 3.69 (s, 4H, tacn), 3.37 – 3.28 (m, 4H, tacn), 3.13 – 3.02 (m, 4H, tacn), 2.98 – 2.93 (m, 3H,  $\text{CH}_3$ ).  $^{13}\text{C}\{^1\text{H}\}$  NMR (126 MHz, MeOD)  $\delta$  174.5 (CO), 174.4 (CO), 137.9 (C Bz), 137.1 (C Bz), 130.1 (Ar(Bz)), 129.8 (Ar(Bz)), 128.9 (Ar(Bz)), 128.7 (Ar(Bz)), 127.8 (Ar(Bz)), 56.3 ( $\text{CH}_2 \text{Ac}$ ), 56.2 ( $\text{CH}_2 \text{Ac}$ ), 53.1 ( $\text{CH}_2(\text{Bz})$ ), 52.5 ( $\text{CH}_2(\text{Bz})$ ), 51.4 (tacn), 51.2 (tacn), 46.4 (tacn), 46.2 (tacn), 45.3 (tacn), 45.1 (tacn), 34.7 ( $\text{CH}_3$ ), 34.3 ( $\text{CH}_3$ ). ESI-HRMS (+ve ion):  $[\mathbf{6}+\text{H}]^+ m/z = 291.2180$  (experimental); 291.2179 (calculated). HPLC:  $R_t = 6.15$  min (Method A).

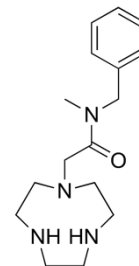

2,2'-(1,4,7-triazonane-1,4-diyl)bis(*N*-benzyl-*N*-methylacetamide).  $^1\text{H}$  NMR (500 MHz, MeOD)  $\delta$  7.35 – 7.19 (m, 10H, Ar(Bz)), 4.67 – 4.55 (m, 4H,  $\text{CH}_2 \text{Bz}$ ), 4.31 – 4.12 (m, 4H,  $\text{CH}_2 \text{Ac}$ ), 3.58 – 3.24 (m, 12H, tacn), 2.98 – 2.92 (m, 6H,  $\text{CH}_3$ ).  $^{13}\text{C}\{^1\text{H}\}$  NMR (126 MHz, MeOD)  $\delta$  172.0 (CO), 170.9 (CO), 170.0 (CO), 137.7 (C Bz), 137.6 (C Bz), 137.0 (C Bz), 136.9 (C Bz), 130.1 (Ar(Bz)), 129.8 (Ar(Bz)), 129.0 (Ar(Bz)), 128.7 (Ar(Bz)), 128.0 (Ar(Bz)), 127.9 (Ar(Bz)), 58.4 ( $\text{CH}_2 \text{Ac}$ ), 58.1 ( $\text{CH}_2 \text{Ac}$ ), 57.9 ( $\text{CH}_2 \text{Ac}$ ), 53.7 (tacn), 53.3 (tacn), 53.2 (tacn), 52.8 ( $\text{CH}_2 \text{Bz}$ ), 52.4 (tacn), 52.3 (tacn), 52.1 ( $\text{CH}_2 \text{Bz}$ ), 51.7 (tacn), 44.6 (tacn), 44.4 (tacn), 34.6 ( $\text{CH}_3$ ), 34.5 ( $\text{CH}_3$ ), 34.2 ( $\text{CH}_3$ ), 34.2 ( $\text{CH}_3$ ). ESI-HRMS (+ve ion):  $[\mathbf{7}+\text{H}]^+ m/z = 452.3021$  (experimental); 452.3020 (calculated). HPLC:  $R_t = 7.80$  min (Method A).

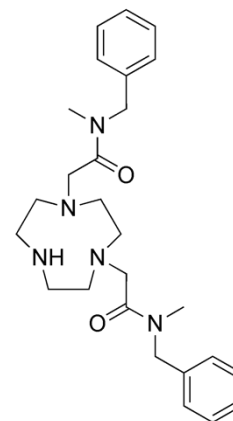

2,2',2''-(1,4,7-triazonane-1,4,7-triyl)tris(*N*-benzyl-*N*-methylacetamide), **L**<sup>030</sup>: <sup>1</sup>H NMR (500 MHz, MeOD) δ 7.40 – 7.21 (m, 15H, Ar(Bz)), 4.62 – 4.55 (m, 6H, CH<sub>2</sub> Bz), 4.08 – 3.98 (m, 6H, CH<sub>2</sub> Ac), 3.30 – 3.10 (m, 12H, tacn), 2.93 (s, 8H, CH<sub>3</sub>). <sup>13</sup>C {<sup>1</sup>H} NMR (126 MHz, MeOD) δ 171.2 (CO), 171.0 (CO), 170.5 (CO), 170.3 (CO), 138.1 (C Bz), 137.6 (C Bz), 130.1 (Ar(Bz)), 129.7 (Ar(Bz)), 128.9 (Ar(Bz)), 128.8 (Ar(Bz)), 128.6 (Ar(Bz)), 127.7 (Ar(Bz)), 127.7 (Ar(Bz)), 57.0 (CH<sub>2</sub> Ac), 56.7 (CH<sub>2</sub> Ac), 52.0 (CH<sub>2</sub> Bz), 51.9 (CH<sub>2</sub> Bz), 51.8 (tacn), 51.6 (tacn), 51.3 (tacn), 34.4 (CH<sub>3</sub>), 34.4 (CH<sub>3</sub>), 34.3 (CH<sub>3</sub>). ESI-HRMS (+ve ion): [**L**<sup>030</sup>+H]<sup>+</sup> *m/z* = 613.3865 (experimental); 613.3861 (calculated). HPLC: *R*<sub>t</sub> = 9.48 min (Method A). UV-vis: ε = 571.7 M<sup>-1</sup>·cm<sup>-1</sup> at 258 nm.

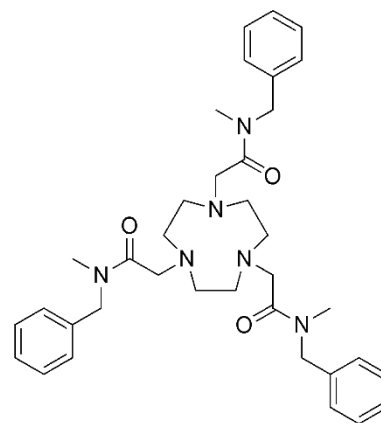

ethyl 6-((4-(2-(benzyl(methyl)amino)-2-oxoethyl)-1,4,7-triazonan-1-yl)methyl)picolinate, **8**. **3** (100 mg, 0.19 mmol, 1 equiv.); potassium carbonate (107 mg, 0.77 mmol, 4 equiv.); *N*-benzyl-2-bromo-*N*-methylacetamide (38 mg, 0.15 mmol, 0.8 equiv.); dry acetonitrile (3 mL). Product: **8** (23 mg, 0.04 mmol, 27%). OR **6** (0.50 g, 0.95 mmol, 1 equiv.); potassium carbonate (0.54 g, 3.75 mmol, 4 equiv.); ethyl 6-(bromomethyl)picolinate (0.19 g, 0.75 mmol, 0.8 equiv.); dry acetonitrile (10 mL). Product: **8** (0.11 g, 0.2 mmol, 21%). HPLC: *R*<sub>t</sub> = 8.02 min (Method A). Product was used without further characterization for subsequent alkylation step.

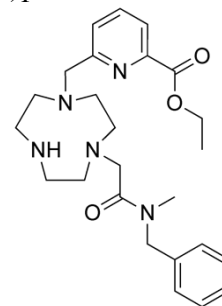

ethyl 6-((4-(2-(benzyl(methyl)amino)-2-oxoethyl)-7-(2-ethoxy-2-oxoethyl)-1,4,7-triazonan-1-yl)methyl)picolinate, **9**: **8** (111 mg, 0.20 mmol, 1 equiv.); potassium carbonate (81 mg, 0.59 mmol, 3 equiv.); ethyl 2-bromoacetate (36 mg, 0.22 mmol, 1.1 equiv.); dry acetonitrile (2 mL). Product: **9** (50mg, 0.16 mmol, 57%). HPLC: *R*<sub>t</sub> = 8.52 min (Method A). Product was used without further characterization for subsequent deprotection step.

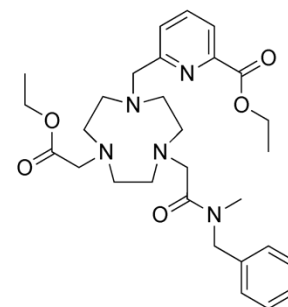

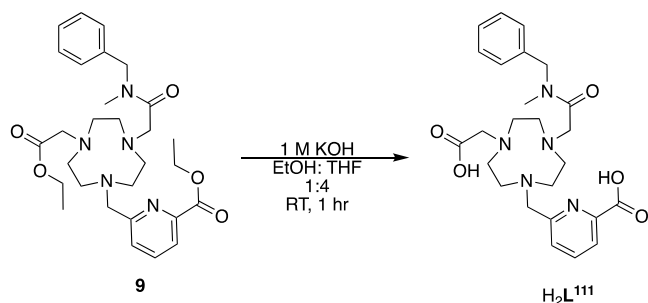

**Scheme S2:** General deprotection procedure.

### General Deprotection Procedure

To a solution of ester in ethanol/tetrahydrofuran (1 mL, 1:4) was added potassium hydroxide (1 M, 13 equiv.). After 1 h at room temperature, the reaction mixture was filtered and the solvent was removed under reduced pressure. The resultant crude mixture was dissolved in acetonitrile/water (1:1) and purified using semi-preparative HPLC (Method E). The products were isolated and concentrated under reduced pressure then lyophilized.

*2,2',2''-(1,4,7-triazonane-1,4,7-triyl)triacetic acid, H<sub>3</sub>L<sup>300</sup>:*

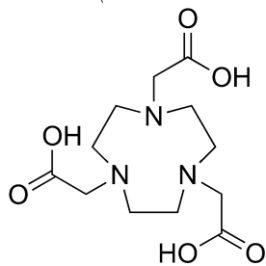

HPLC:  $R_t = 2.02$  min (Method A). UV-vis:  $\epsilon = 397.7 \text{ M}^{-1} \cdot \text{cm}^{-1}$  at 231 nm.

*2,2',2''-(2-(4-aminobenzyl)-1,4,7-triazonane-1,4,7-triyl)triacetic acid, H<sub>3</sub>L<sup>300-BzNH<sub>2</sub></sup>:*

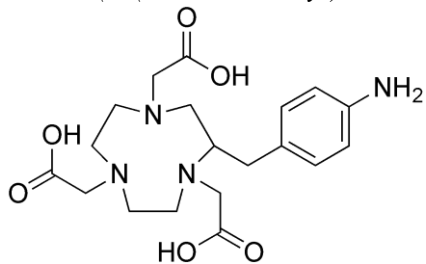

HPLC:  $R_t = 4.57$  min (Method A). UV-vis:  $\epsilon = 5254 \text{ M}^{-1} \cdot \text{cm}^{-1}$  at 220 nm.



6,6',6''-((1,4,7-triazonane-1,4,7-triyl)tris(methylene))tripicolinic acid,  $H_3L^{003}$ :

$^1H$  NMR (500 MHz, MeOD)  $\delta$  7.96 (dd,  $J = 7.7, 1.2$  Hz, 3H, Ar(Pa)), 7.92 (t,  $J = 7.7$  Hz, 3H, Ar(Pa)), 7.59 (dd,  $J = 7.6, 1.3$  Hz, 3H, Ar(Pa)), 4.42 (s, 6H,  $CH_2$ (Pa)), 3.48 (s, 12H, tacn).  $^{13}C\{^1H\}$  NMR (126 MHz, MeOD)  $\delta$  167.4 (CO), 157.0 (C $CH_2$ N), 148.9 (CCOOH), 139.8 (Ar(Pa)), 128.1 (Ar(Pa)), 125.6 (Ar(Pa)), 61.4 ( $CH_2$  Pa), 53.5 (tacn). ESI-HRMS (+ve ion): [ $H_3L^{003}+H$ ] $^+$   $m/z = 535.2295$  (experimental); 535.2300 (calculated). HPLC:  $R_t = 5.53$  min (Method A). UV-vis:  $\epsilon = 12674 M^{-1}\cdot cm^{-1}$  at 268 nm.

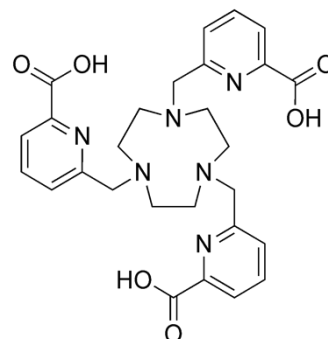

2,2'-(7-(2-(benzyl(methyl)amino)-2-oxoethyl)-1,4,7-triazonane-1,4-diyl)diacetic acid,  $H_2L^{210}$ :

$^1H$  NMR (500 MHz, MeOD)  $\delta$  7.41 – 7.26 (m, 5H, Ar(Bz)), 4.63 – 4.54 (m, 2H,  $CH_2$ (Bz)), 4.20 – 4.14 (m, 2H,  $CH_2$  (Am)), 3.73 (s, 4H,  $CH_2$ (Ac)), 3.27 – 3.00 (m, 12H, tacn), 2.96 – 2.93 (m, 3H,  $CH_3$ ).  $^{13}C\{^1H\}$  NMR (126 MHz, MeOD)  $\delta$  173.6 (CO Ac), 173.5 (CO Ac), 169.3 (CO Am), 169.1 (CO Am), 138.0 (C(Bz)), 137.3 (C(Bz)), 130.1 (Ar(Bz)), 129.8 (Ar(Bz)), 129.1 (Ar(Bz)), 128.9 (Ar(Bz)), 128.6 (Ar(Bz)), 127.8 (Ar(Bz)), 56.6 ( $CH_2$  (Am)), 56.5 ( $CH_2$  (Am)), 56.0 ( $CH_2$ (Ac)), 53.3 ( $CH_2$ (Bz)), 52.5 ( $CH_2$ (Bz)), 52.4 (tacn), 52.1 ( $CH_2$ (Bz)), 51.1 (tacn), 49.6 (tacn), 34.4 ( $CH_3$ ), 34.2 ( $CH_3$ ). ESI-HRMS (+ve ion): [ $H_2L^{210}+H$ ] $^+$   $m/z = 407.2285$  (experimental); 407.2289 (calculated). HPLC:  $R_t = 6.85$  min (Method A). UV-vis:  $\epsilon = 299.7 M^{-1}\cdot cm^{-1}$  at 257 nm.

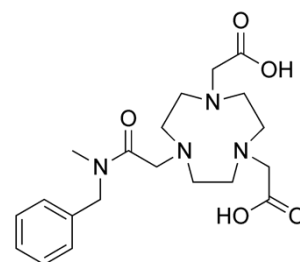

2,2'-(7-((6-carboxypyridin-2-yl)methyl)-1,4,7-triazonane-1,4-diyl)diacetic acid,  $H_3L^{201}$ :

$^1H$  NMR (600 MHz, MeOD)  $\delta$  8.12 (dd,  $J = 7.6, 1.0$  Hz, 1H, Ar(Pa)), 8.01 (t,  $J = 7.7$  Hz, 1H, Ar(Pa)), 7.88 (dd,  $J = 7.8, 1.1$  Hz, 1H, Ar(Pa)), 4.31 (s, 2H,  $CH_2$ (Pa)), 3.62 (s, 4H,  $CH_2$ (Ac)), 3.08 (d,  $J = 23.7$  Hz, 12H, tacn).  $^{13}C\{^1H\}$  NMR (151 MHz, MeOD)  $\delta$  173.5 (CO(Ac)), 167.9 (CO(Pa)), 157.5 (C $CH_2$ N), 149.5 (CCOOH(Pa)), 140.1 (Ar(Pa)), 128.9 (Ar(Pa)), 125.6 (Ar(Pa)), 61.1 ( $CH_2$ (Pa)), 56.8 (Pa(Ac)), 51.3 (tacn), 51.1 (tacn), 51.0 (tacn). ESI-HRMS (+ve ion): [ $H_3L^{201}+H$ ] $^+$   $m/z = 381.1766$  (experimental); 381.1769 (calculated). HPLC:  $R_t = 3.23$  min (Method A). UV-vis:  $\epsilon = 5526 M^{-1}\cdot cm^{-1}$  at 271 nm.

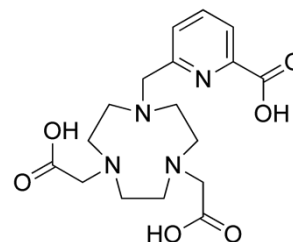

2-(4,7-bis(2-(benzyl(methyl)amino)-2-oxoethyl)-1,4,7-triazonane-1-yl)acetic acid,  $HL^{120}$ :

$^1H$  NMR (600 MHz, MeOD)  $\delta$  7.39 – 7.23 (m, 10H, Ar(Bz)), 4.67 – 4.53 (m, 4H,  $CH_2$ (Bz)), 4.13 – 4.02 (m, 4H,  $CH_2$  (Am)), 3.73 – 3.64 (m, 2H,  $CH_2$ (Ac)), 3.16 (s, 12H, tacn), 2.95 – 2.91 (m, 6H,  $CH_3$ ).  $^{13}C\{^1H\}$  NMR (151 MHz, MeOD)  $\delta$  174.1 (CO(Ac)), 174.0 (CO(Ac)), 170.5 (CO (Am)), 170.3 (CO (Am)), 170.1 (CO (Am)), 169.9 (CO (Am)), 138.1 (C(Bz)), 137.5 (C(Bz)), 130.1 (Ar(Bz)), 130.1 (Ar(Bz)), 129.7 (Ar(Bz)), 129.0 (Ar(Bz)), 128.9 (Ar(Bz)), 128.8 (Ar(Bz)), 128.6 (Ar(Bz)), 127.8 (Ar(Bz)), 56.6 ( $CH_2$  (Am)), 56.4 ( $CH_2$  (Am)), 56.3 ( $CH_2$ (Ac)), 56.2 ( $CH_2$ (Ac)), 53.3 ( $CH_2$ (Bz)),

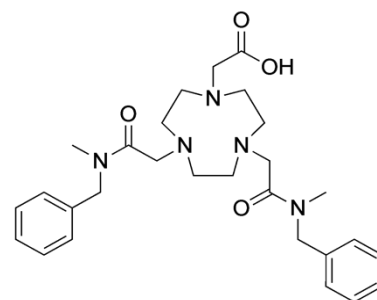

52.5 (t, 1H, Ar(Pa)), 52.3 (t, 1H, Ar(Pa)), 52.0 (CH<sub>2</sub>(Bz)), 51.4 (t, 1H, Ar(Pa)), 51.1 (t, 1H, Ar(Pa)), 50.2 (t, 1H, Ar(Pa)), 50.0 (t, 1H, Ar(Pa)), 34.4, (CH<sub>3</sub>) 34.3 (CH<sub>3</sub>), 34.2 (CH<sub>3</sub>). ESI-HRMS (+ve ion): [HL<sup>120</sup>+H]<sup>+</sup> *m/z* = 510.3071 (experimental); 510.3075 (calculated). HPLC: R<sub>t</sub> = 8.57 min (Method A). UV-vis: ε = 489.9 M<sup>-1</sup>·cm<sup>-1</sup> at 258 nm.

6-((4-(2-(benzyl(methyl)amino)-2-oxoethyl)-7-(carboxymethyl)-1,4,7-triazonan-1-yl)methyl)picolinic acid, H<sub>2</sub>L<sup>111</sup>:

<sup>1</sup>H NMR (500 MHz, MeOD) δ 8.10 (t, *J* = 7.2 Hz, 1H, Ar(Pa)), 8.00 – 7.91 (m, 1H, Ar(Pa)), 7.85 – 7.78 (m, 1H, Ar(Pa)), 7.40 – 7.17 (m, 5H, Ar(Bz)), 4.63 – 4.49 (m, 2H, CH<sub>2</sub>(Bz)), 4.40 – 4.35 (m, 2H, CH<sub>2</sub>(Pa)), 4.18 – 3.95 (m, 2H, CH<sub>2</sub>(Am)), 3.75 – 3.61 (m, 2H, CH<sub>2</sub>(Ac)), 3.39 – 3.04 (m, 12H, tacn), 2.94 – 2.90 (m, 3H, CH<sub>3</sub>). <sup>13</sup>C{<sup>1</sup>H} NMR (126 MHz, MeOD) δ 173.4 (CO Ac), 173.3 (CO Ac), 170.2 (CO Am), 169.6 (CO Am), 167.6 (CO Pa), 167.4 (CO Pa), 157.4 (CCH<sub>2</sub>N), 157.1 (CCH<sub>2</sub>N), 149.0 (CCOOH Pa), 148.9 (CCOOH Pa), 140.1 (Ar(Pa)), 140.0 (Ar(Pa)), 138.0 (C Bz), 137.4 (C Bz), 130.1 (Ar(Bz)), 129.8 (Ar(Bz)), 129.0 (Ar(Bz)), 128.9 (Ar(Bz)), 128.8 (Ar(Pa)), 128.6 (Ar(Pa)), 127.7 (Ar(Bz)), 125.7 (Ar(Pa)), 60.8 (CH<sub>2</sub>(Pa)), 57.4 (CH<sub>2</sub>(Am)), 56.7 (CH<sub>2</sub>(Am)), 56.5 (CH<sub>2</sub>(Ac)), 56.3 (CH<sub>2</sub>(Ac)), 53.3 (CH<sub>2</sub>(Bz)), 53.0 (CH<sub>2</sub>(Bz)), 52.5 (tacn), 52.4 (tacn), 52.3 (tacn), 52.1 (tacn), 51.8 (tacn), 51.4 (tacn), 51.2 (tacn), 50.9 (tacn), 50.8 (tacn), 34.5 (CH<sub>3</sub>), 34.3 (CH<sub>3</sub>). ESI-HRMS (+ve ion): [H<sub>2</sub>L<sup>111</sup>+H]<sup>+</sup> *m/z* = 484.2554 (experimental); 484.2554 (calculated). HPLC: R<sub>t</sub> = 6.87 min (Method A). UV-vis: ε = 8360 M<sup>-1</sup>·cm<sup>-1</sup> at 271 nm.

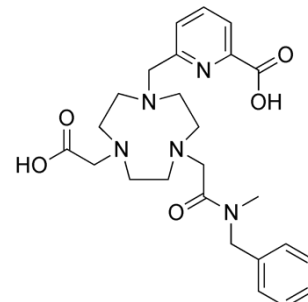

6,6'-((7-(carboxymethyl)-1,4,7-triazonane-1,4-diyl)bis(methylene))dipicolinic acid, H<sub>3</sub>L<sup>102</sup>:

<sup>1</sup>H NMR (500 MHz, MeOD) δ 8.05 (dd, *J* = 7.8, 1.1 Hz, 2H, Ar(Pa)), 7.96 (t, *J* = 7.7 Hz, 2H, Ar(Pa)), 7.70 (dd, *J* = 7.8, 1.1 Hz, 2H, Ar(Pa)), 4.40 (s, 4H, CH<sub>2</sub>(Pa)), 3.62 (s, 2H, CH<sub>2</sub>(Ac)), 3.38 – 3.09 (m, 12H, tacn). <sup>13</sup>C{<sup>1</sup>H} NMR (126 MHz, MeOD) δ 173.6 (CO(Ac)), 167.5 (CO(Pa)), 156.7 (C(Pa)), 149.1 (CCH<sub>2</sub>N), 139.9 (Ar(Pa)), 128.5 (Ar(Pa)), 125.7 (Ar(Pa)), 61.0 (CH<sub>2</sub>(Pa)), 56.8 (CH<sub>2</sub>(Ac)), 53.1 (tacn), 52.1 (tacn), 51.4 (tacn). ESI-HRMS (+ve ion): [H<sub>3</sub>L<sup>102</sup>+H]<sup>+</sup> *m/z* = 458.2032 (experimental); 458.2034 (calculated). HPLC: R<sub>t</sub> = 5.05 min (Method A). UV-vis: ε = 8056 M<sup>-1</sup>·cm<sup>-1</sup> at 269 nm.

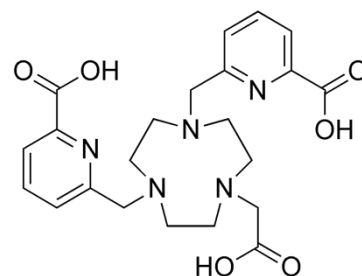

6-((4,7-bis(2-(benzyl(methyl)amino)-2-oxoethyl)-1,4,7-triazonan-1-yl)methyl)picolinic acid, HL<sup>021</sup>:

<sup>1</sup>H NMR (500 MHz, MeOD) δ 8.15 – 7.05 (m, 1H, Ar(Pa)), 8.02 – 7.90 (m, 1H, Ar(Pa)), 7.81 – 7.71 (m, 1H, Ar(Pa)), 7.39 – 7.14 (m, 10H, Ar(Bz)), 4.63 – 4.49 (m, 4H, CH<sub>2</sub>(Bz)), 4.49 – 4.41 (m, 2H, CH<sub>2</sub>(Pa)), 4.35 – 4.23 (m, 4H, CH<sub>2</sub>(Am)), 3.84 – 3.25 (m, 12H, tacn), 2.96 – 2.88 (m, 6H, CH<sub>3</sub>). <sup>13</sup>C{<sup>1</sup>H} NMR (126 MHz, MeOD) δ 169.9 (CO (Am)), 169.0 (CO (Am)), 168.8 (CO (Am)), 167.7 (CO(Pa)), 167.5 (CO(Pa)), 157.3 (C(Pa)), 148.6 (CCH<sub>2</sub>N), 148.4 (CCH<sub>2</sub>N), 140.3 (Ar(Pa)), 137.8 (C(Bz)), 137.7 (C(Bz)), 137.1 (C(Bz)), 130.4 (Ar(Bz)), 130.1 (Ar(Bz)), 130.0 (Ar(Bz)), 129.7 (Ar(Bz)), 129.1 (Ar(Bz)), 129.0 (Ar(Bz)), 128.8 (Ar(Bz)), 128.7 (Ar(Bz)), 128.6 (Ar(Bz)), 128.5 (Ar(Bz)), 128.3 (Ar(Pa)), 127.8 (Ar(Bz)), 125.8

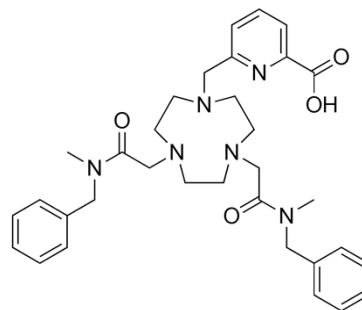

(Ar(Pa)), 61.3 (CH<sub>2</sub>(Pa)), 60.9 (CH<sub>2</sub>(Pa)), 60.6 (CH<sub>2</sub>(Pa)), 58.8 (CH<sub>2</sub> (Am)), 58.4 (CH<sub>2</sub> (Am)), 58.0 (CH<sub>2</sub> (Am)), 53.6 (CH<sub>2</sub>(Bz)), 53.3 (CH<sub>2</sub>(Bz)), 53.0 (tacn), 52.7 (tacn), 52.2 (tacn), 52.0 (CH<sub>2</sub>(Bz)), 51.9 (CH<sub>2</sub>(Bz)), 51.7 (CH<sub>2</sub>(Bz)), 34.4 (CH<sub>3</sub>), 34.3 (CH<sub>3</sub>) 33.4 (CH<sub>3</sub>). ESI-HRMS (+ve ion): [HL<sup>021</sup>+H]<sup>+</sup> *m/z* = 587.3339 (experimental); 587.3340 (calculated). HPLC: R<sub>t</sub> = 8.27 min (Method A). UV-vis: ε = 4174 M<sup>-1</sup>·cm<sup>-1</sup> at 268 nm.

6,6'-((7-(2-(benzyl(methyl)amino)-2-oxoethyl)-1,4,7-triazonane-1,4-diy)bis(methylene)dipicolinic acid, H<sub>2</sub>L<sup>012</sup>:

<sup>1</sup>H NMR (500 MHz, MeOD) δ 8.03 – 7.97 (m, 2H, Ar(Pa)), 7.95 – 7.87 (m, 2H, Ar(Pa)), 7.72 – 7.63 (m, 2H, Ar(Pa)), 7.39 – 7.09 (m, 5H, Ar(Bz)), 4.51 – 4.42 (m, 2H, CH<sub>2</sub>(Bz)), 4.50 – 4.38 (m, 4H, CH<sub>2</sub>(Pa)), 4.19 – 3.94 (m, 2H, CH<sub>2</sub> (Am)), 3.71 – 3.20 (m, 12H, tacn), 2.94 – 2.82 (m, 3H, CH<sub>3</sub>). <sup>13</sup>C {<sup>1</sup>H} NMR (126 MHz, MeOD) δ 170.1 (CO (Am)), 169.4 (CO (Am)), 167.4 (CO(Pa)), 157.0 (C(Pa)), 156.8 (C(Pa)), 148.8 (CCH<sub>2</sub>N), 148.6 (CCH<sub>2</sub>N), 139.9 (Ar(Pa)), 137.8 (C(Bz)), 137.3 (C(Bz)), 130.1 (Ar(Bz)), 129.7 (Ar(Bz)), 128.9 (Ar(Bz)), 128.6 (Ar(Bz)), 128.5 (Ar(Bz)), 128.2 (Ar(Pa)), 127.6 (Ar(Bz)), 125.7 (Ar(Pa)), 61.2 (CH<sub>2</sub>(Pa)), 58.4 (CH<sub>2</sub> (Am)), 57.5 (CH<sub>2</sub> (Am)), 53.3 (CH<sub>2</sub>(Bz)), 53.2 (CH<sub>2</sub>(Bz)), 52.8 (tacn), 52.7 (tacn), 52.4 (tacn), 52.2 (CH<sub>2</sub>(Bz)), 34.4 (CH<sub>3</sub>), 34.3 (CH<sub>3</sub>). ESI-HRMS (+ve ion): [H<sub>2</sub>L<sup>012</sup>+H]<sup>+</sup> *m/z* = 561.2817 (experimental); 561.2820 (calculated). HPLC: R<sub>t</sub> = 6.90 min (Method A). UV-vis: ε = 13511 M<sup>-1</sup>·cm<sup>-1</sup> at 268 nm.

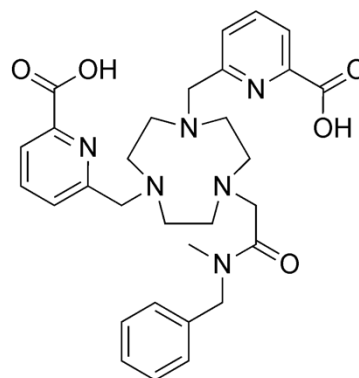

### 1.3 Synthesis and characterization of coordination complexes

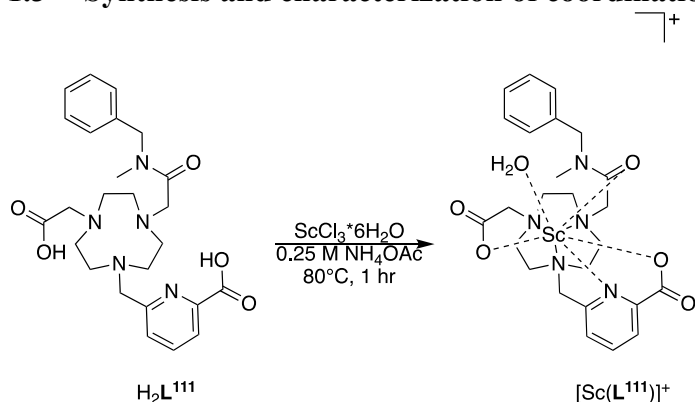

**Scheme S3:** General scandium complexation procedure.

#### 1.3.1 General Scandium Complexation Procedure

To a solution of ligand in ammonium acetate (0.25 M, pH 4.5, 5-10 mL) was added scandium(III) chloride hexahydrate and the reaction mixture was heated to 80 °C for 1 hour, then checked via LCMS to ensure complete complexation. The scandium complexes were isolated and analyzed as crude product.

#### $[Sc(L^{300})]$

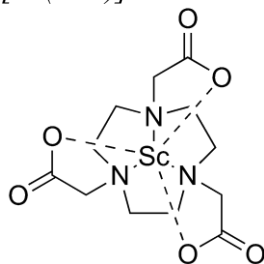

$H_3L^{300}$  (7.18 mg, 24.1  $\mu$ mol, 1 equiv.); scandium(III) chloride hexahydrate (6.25 mg, 24.1  $\mu$ mol, 1 equiv.).  $^1H$  NMR (500 MHz, MeOD)  $\delta$  3.77 (d,  $J$  = 15.9 Hz, 2H, Ac(CH<sub>2</sub>)), 3.70 (s, 2H, Ac(CH<sub>2</sub>)), 3.35 (d,  $J$  = 15.7 Hz, 2H, Ac(CH<sub>2</sub>)), 3.25 – 2.95 (m, 12H, tacn).  $^{13}C\{^1H\}$  NMR (126 MHz, MeOD)  $\delta$  66.6(Ac(CH<sub>2</sub>)), 65.6(Ac(CH<sub>2</sub>)), 56.1 (tacn), 54.5 (tacn).  $^{45}Sc$  NMR (122 MHz, MeOD)  $\delta$  102.9.  $^{45}Sc$  NMR (122 MHz, D<sub>2</sub>O)  $\delta$  101.5. ESI-HRMS (+ve ion):  $[Sc(L^{300})+H]^+$   $m/z$  = 346.0830 (experimental); 346.0827 (calculated). HPLC:  $R_t$  = 2.93 min (Method B).

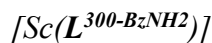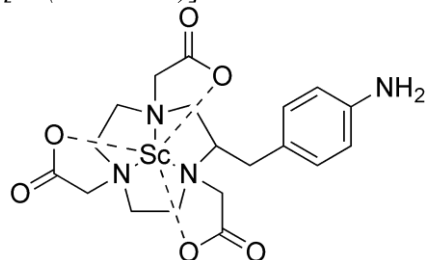

$H_3L^{300-BzNH_2}$  (51.7 mg, 100  $\mu$ mol, 1 equiv.); scandium(III) chloride hexahydrate (25.9 mg, 100  $\mu$ mol, 1 equiv.).  $^1H$  NMR (500 MHz, MeOD)  $\delta$  7.63 – 7.21 (m, 7H, Ar(Bz) +  $NH_3^+$ ), 4.59 – 2.58 (m, 19H,  $CH_2$  Bz) +  $CH_2$ (Ac) + tacn).  $^{13}C\{^1H\}$  NMR (126 MHz, MeOD)  $\delta$  190.1, 182.6, 181.6, 179.8, 139.4 (CNH<sub>2</sub>), 131.9 (Ar(Bz)), 130.7 ( $CH_2$ (Bz)), 124.4 (Ar(Bz)), 68.0 ( $CH_2$ ), 66.6 ( $CH_2$ ), 65.3 ( $CH_2$ ), 63.8 ( $CH_2$ ), 58.6 ( $CH_2$ ), 57.2 ( $CH_2$ ), 57.0 ( $CH_2$ ), 55.7 ( $CH_2$ ), 51.7 ( $CH_2$ ), 51.6 ( $CH_2$ ), 51.4 ( $CH_2$ ), 51.2 ( $CH_2$ ), 51.0 ( $CH_2$ ), 32.5 ( $CH_2$ (Bz)).  $^{45}Sc$  NMR (122 MHz, MeOD)  $\delta$  95.0.  $^{45}Sc$  NMR (122 MHz, D<sub>2</sub>O)  $\delta$  91.7. ESI-HRMS (+ve ion):  $[Sc(L^{300-BzNH_2})+H]^+$   $m/z$  = 451.1407 (experimental); 451.1406 (calculated). HPLC:  $R_t$  = 1.51 min (Method B).

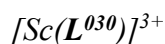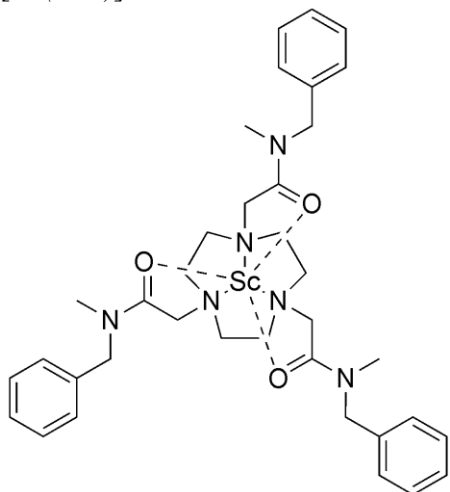

$L^{030}$  (11.6 mg, 19.0  $\mu$ mol, 1 equiv.); scandium(III) chloride hexahydrate (4.93 mg, 19.0  $\mu$ mol, 1 equiv.).  $^1H$  NMR (500 MHz, MeOD)  $\delta$  7.52 – 7.02 (m, 15H, Ar(Bz)), 5.01 – 4.09 (m, 12H,  $CH_2$ (Bz) &  $CH_2$ (Am)), 3.87 – 3.64 (m, 4H,  $CH_2$ (Ac)), 3.50 – 3.11 (m, 12H, tacn), 3.12 – 2.88 (m, 9H,  $CH_3$ ).  $^{13}C\{^1H\}$  NMR (126 MHz, MeOD)  $\delta$  178.2 (CO), 176.3 (CO), 130.4 (CH(Bz)), 130.1 (CH(Bz)), 129.8 (CH(Bz)), 129.6 (CH(Bz)), 128.5 (CH(Bz)), 128.3 (CH(Bz)), 56.7 (tacn), 55.2 (tacn), 53.4 ( $CH_2$ (Bz)), 35.7 ( $CH_3$ ).  $^{45}Sc$  NMR (122 MHz, MeOD)  $\delta$  98.9.  $^{45}Sc$  NMR (122 MHz, D<sub>2</sub>O)  $\delta$  100.9. ESI-HRMS (+ve ion):  $[Sc(L^{030})+HCOO]^{2+}$   $m/z$  = 351.1662 (experimental); 351.1657 (calculated). HPLC:  $R_t$  = 12.13 min (Method B).

[Sc(L<sup>003</sup>)]

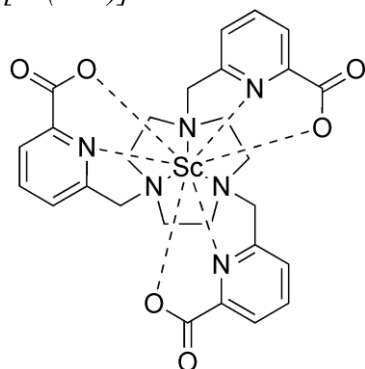

H<sub>3</sub>L<sup>003</sup> (1.44 mg, 2.69 μmol, 1 equiv.); scandium(III) chloride hexahydrate (0.70 mg, 2.69 μmol, 1 equiv.). <sup>1</sup>H NMR (500 MHz, MeOD) δ 8.13 (t, *J* = 7.7 Hz, 3H, Ar(Pa)), 8.01 (d, *J* = 7.6 Hz, 3H, Ar(Pa)), 7.67 (d, *J* = 7.7 Hz, 3H, Ar(Pa)), 4.04 (dd, *J* = 37.2, 14.2 Hz, 6H, CH<sub>2</sub>(Pa)), 3.67 – 3.52 (m, 3H, tacn), 2.80 (dd, *J* = 16.1, 5.9 Hz, 3H, tacn), 2.54 (dd, *J* = 12.5, 5.2 Hz, 3H, tacn), 2.15 (td, *J* = 13.2, 5.9 Hz, 4H, tacn). <sup>13</sup>C{<sup>1</sup>H} NMR (126 MHz, MeOD) δ 169.4 (COOSc), 156.1 (CCH<sub>2</sub>N), 150.7 (CCOOSc), 141.9 (CH(Pa)), 126.4 (CH(Pa)), 124.3 (CH(Pa)), 66.6 (CH<sub>2</sub>(Pa)), 59.0 (tacn), 57.6 (tacn). <sup>45</sup>Sc NMR (122 MHz, MeOD) δ 39.9. <sup>45</sup>Sc NMR (122 MHz, D<sub>2</sub>O) δ 45.6. ESI-HRMS (+ve ion): [Sc(L<sup>003</sup>)+H]<sup>+</sup> *m/z* = 577.1623 (experimental); 577.1624 (calculated). HPLC: R<sub>t</sub> = 7.35 min (Method B). Crystals suitable for single crystal X-ray diffraction were grown from slow evaporation of the aqueous reaction solution (CCDC: 2369298).

[Sc(L<sup>210</sup>)]<sup>+</sup>

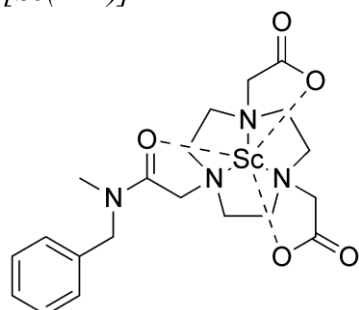

H<sub>2</sub>L<sup>210</sup> (7.73 mg, 19.0 μmol, 1 equiv.); scandium(III) chloride hexahydrate (4.93 mg, 19.0 μmol, 1 equiv.). <sup>1</sup>H NMR (500 MHz, MeOD) δ 7.49 – 7.23 (m, 5H, Ar(Bz)), 4.94 – 4.41 (m, 2H, CH<sub>2</sub>(Bz)), 4.13 – 4.06 (m, 2H, CH<sub>2</sub>(Am)), 3.87 – 3.64 (m, 4H, CH<sub>2</sub>(Ac)), 3.41 – 2.91 (m, 12H, tacn), 3.06 (d, *J* = 16.3 Hz, 3H, CH<sub>3</sub>). <sup>13</sup>C{<sup>1</sup>H} NMR (126 MHz, MeOD) δ 179.1 (CO(Ac)), 176.1 (CO(Am)), 136.5 (C(Bz)), 130.3 (CH(Bz)), 130.0 (CH(Bz)), 129.7 (CH(Bz)), 129.3 (CH(Bz)), 128.3 (CH(Bz)), 66.7 (CH<sub>2</sub>(Ac)), 62.9 (CH<sub>2</sub>(Am)), 56.1 (tacn), 55.1 (tacn), 54.5 (CH<sub>2</sub>(Bz)), 53.2 (CH<sub>2</sub>(Bz)), 35.6 (CH<sub>3</sub>). <sup>45</sup>Sc NMR (122 MHz, MeOD) δ 100.5. <sup>45</sup>Sc NMR (122 MHz, D<sub>2</sub>O) δ 101.0. ESI-HRMS (+ve ion): [Sc(L<sup>210</sup>)]<sup>+</sup> *m/z* = 449.1610 (experimental); 449.1613 (calculated). HPLC: R<sub>t</sub> = 8.63 min (Method B).

[Sc(L<sup>201</sup>)]

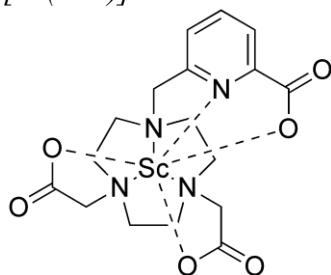

H<sub>3</sub>L<sup>201</sup> (9.9 mg, 26 μmol, 1 equiv.); scandium(III) chloride hexahydrate (6.8 mg, 26 μmol, 1 equiv.). <sup>1</sup>H NMR (500 MHz, MeOD) δ 8.12 (t, *J* = 7.7 Hz, 1H, Ar(Pa)), 8.03 (dd, *J* = 7.6, 1.2 Hz, 1H, Ar(Pa)), 7.61 (dd, *J* = 7.7, 1.2 Hz, 1H, Ar(Pa)), 4.38 (s, 2H, CH<sub>2</sub> Pa), 4.01 (d, *J* = 15.3 Hz, 2H, CH<sub>2</sub> Ac a), 3.28\* (d, 2H, CH<sub>2</sub> Ac a), 3.27 – 2.96 (m, 12H, tacn). <sup>13</sup>C{<sup>1</sup>H} NMR (126 MHz, MeOD) δ 180.2 (CO(Ac)), 172.1 (CO(Pa)), 157.7 (CH<sub>2</sub>C(Pa)), 153.0 (CCO(Pa)), 142.4 (Ar(Pa)), 125.2 (Ar(Pa)), 124.2 (Ar(Pa)), 67.2 (CH<sub>2</sub>(Ac)), 65.4 (CH<sub>2</sub>(Pa)), 56.7 (tacn), 55.4 (tacn), 54.9 (tacn). \*Overlapping residual solvent peak confirmed by <sup>1</sup>H-<sup>1</sup>H COSY NMR. <sup>45</sup>Sc NMR (122 MHz, MeOD) δ 67.8. <sup>45</sup>Sc NMR (122 MHz, D<sub>2</sub>O) δ 84.8, 69.8. ESI-HRMS (+ve ion): [Sc(L<sup>201</sup>+H)]<sup>+</sup> *m/z* = 423.1097 (experimental); 423.1093 (calculated). HPLC: R<sub>t</sub> = 5.85 min (Method B).

[Sc(L<sup>120</sup>)]<sup>2+</sup>

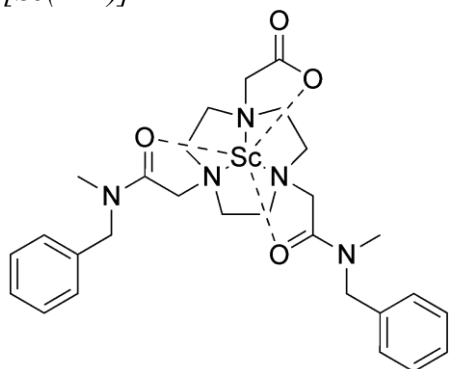

HL<sup>120</sup> (2.58 mg, 5.06 μmol, 1 equiv.); scandium(III) chloride hexahydrate (1.31 mg, 5.06 μmol, 1 equiv.). <sup>1</sup>H NMR (500 MHz, MeOD) δ 7.56 – 7.08 (m, 10H, Ar(Bz)), 5.21 – 3.58 (m, 10H, CH<sub>2</sub>(Bz) & CH<sub>2</sub>(Am) & CH<sub>2</sub>(Ac)), 3.47 – 3.11 (m, 12H, tacn), 3.10 – 3.04 (m, 6H, CH<sub>3</sub>). <sup>13</sup>C{<sup>1</sup>H} NMR (126 MHz, MeOD) δ 178.7 (CO(Ac)), 178.3 (CO(Ac)), 176.4 (CO(Am)), 176.0 (CO(Am)), 136.3 (C(Bz)), 130.9 (Ar(Bz)), 130.7 (Ar(Bz)), 130.5 (Ar(Bz)), 130.3 (Ar(Bz)), 130.0 (Ar(Bz)), 129.7 (Ar(Bz)), 129.6 (Ar(Bz)), 129.4 (Ar(Bz)), 128.5 (Ar(Bz)), 128.2 (Ar(Bz)), 127.8 (Ar(Bz)), 65.7 (CH<sub>2</sub>(Ac)), 63.7 (CH<sub>2</sub>(Am)), 62.8 (CH<sub>2</sub>(Am)), 56.6 (tacn), 56.4 (tacn), 55.3 (tacn), 54.4 (CH<sub>2</sub>(Bz)), 54.1 (CH<sub>2</sub>(Bz)), 53.6 (CH<sub>2</sub>(Bz)), 53.2 (CH<sub>2</sub>(Bz)), 35.3 (CH<sub>3</sub>(Am)), 33.1 (CH<sub>3</sub>(Am)), 32.7 (CH<sub>3</sub>(Am)). <sup>45</sup>Sc NMR (122 MHz, MeOD) δ 97.8, 70.7. <sup>45</sup>Sc NMR (122 MHz, D<sub>2</sub>O) δ 101.1. ESI-HRMS (+ve ion): [Sc(L<sup>120</sup>+OAc)]<sup>+</sup> *m/z* = 612.2621 (experimental); 612.2610 (calculated). HPLC: R<sub>t</sub> = 11.58 min (Method B).

$[Sc(L^{111})]^+$

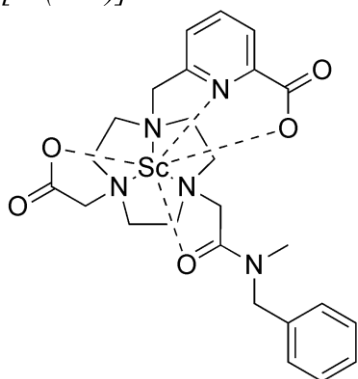

$H_2L^{111}$  (5.00 mg, 10.3  $\mu\text{mol}$ , 1 equiv.); scandium(III) chloride hexahydrate (2.68 mg, 10.3  $\mu\text{mol}$ , 1 equiv.).  $^1\text{H}$  NMR (500 MHz, MeOD)  $\delta$  8.18 – 8.08 (m, 1H, Ar(Pa)), 8.07 – 7.98 (m, 1H, Ar(Pa)), 7.68 – 7.62 (m, 1H, Ar(Pa)), 7.41 – 6.98 (m, 5H, Ar(Bz)), 4.66 – 3.98 (m, 8H,  $\text{CH}_2(\text{Pa})$  &  $\text{CH}_2(\text{Bz})$  &  $\text{CH}_2(\text{Am})$  &  $\text{CH}_2(\text{Ac})$ ), 3.58 – 3.32 (m, 12H, tacn), 3.03 (s, 3H,  $\text{CH}_3$ ).  $^{13}\text{C}\{^1\text{H}\}$  NMR (126 MHz, MeOD)  $\delta$  179.86, 179.68, 176.66, 176.38, 176.24, 171.49, 157.81, 153.27, 142.71, 142.66, 136.57, 135.93, 130.24, 129.82, 129.29, 128.42, 128.08, 125.31, 124.03, 123.90, 121.73, 119.40, 117.07, 114.75, 74.24, 66.53, 66.38, 65.24, 64.85, 64.64, 57.06, 56.68, 56.45, 56.29, 56.23, 56.06, 54.59, 54.37, 54.28, 54.06, 53.77, 53.55, 53.27, 35.59, 34.90.  $^{45}\text{Sc}$  NMR (122 MHz, MeOD)  $\delta$  68.5.  $^{45}\text{Sc}$  NMR (122 MHz,  $\text{D}_2\text{O}$ )  $\delta$  87.0, 71.0. ESI-HRMS (+ve ion):  $[\text{Sc}(L^{111})]^+$   $m/z$  = 526.1889 (experimental); 526.1879 (calculated). HPLC:  $R_t$  = 7.95 min (Method B).



[Sc(L<sup>102</sup>)]

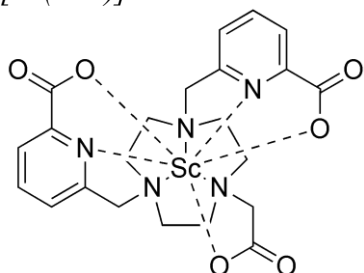

H<sub>3</sub>L<sup>102</sup> (5.76 mg, 12.6 μmol, 1 equiv.); scandium(III) chloride hexahydrate (3.27 mg, 12.6 μmol, 1 equiv.). <sup>1</sup>H NMR (500 MHz, MeOD) δ 8.33 – 7.48 (m, 6H, Ar(Pa)), 4.74 (d, J = 15.7 Hz, 1H, CH<sub>2</sub>(Pa)), 4.33 (dd, J = 14.9, 10.3 Hz, 2H, CH<sub>2</sub>(Pa)), 4.11 (d, J = 14.0 Hz, 1H, CH<sub>2</sub>(Pa)), 4.03 (d, J = 15.9 Hz, 1H, CH<sub>2</sub>(Ac)), 3.64 – 2.74 (m, 12H, tacn), 3.48 (d, J = 15.8 Hz, 1H, CH<sub>2</sub>(Ac)). <sup>13</sup>C {<sup>1</sup>H} NMR (126 MHz, MeOD) δ 176.5 (CO(Ac)), 172.6 (CO(Pa)), 171.4 (CO(Pa)), 158.0 (CH<sub>2</sub>C(Pa)), 155.8 (CCO(Pa)), 154.3 (CCO(Pa)), 151.7 (Ar(Pa)), 144.2 (Ar(Pa)), 138.7 (Ar(Pa)), 128.2 (Ar(Pa)), 126.9 (Ar(Pa)), 124.5 (Ar(Pa)), 123.9 (Ar(Pa)), 66.6 (CH<sub>2</sub>(Ac)), 65.2 (CH<sub>2</sub>(Pa)), 63.3 (CH<sub>2</sub>(Pa)), 55.7 (tacn), 55.5 (tacn), 54.8 (tacn), 54.6 (tacn), 52.2 (tacn). <sup>45</sup>Sc NMR (122 MHz, MeOD) δ 129.6. <sup>45</sup>Sc NMR (122 MHz, D<sub>2</sub>O) δ 131.8. ESI-HRMS (+ve ion): [Sc(L<sup>102</sup>)+H]<sup>+</sup> *m/z* = 500.1355 (experimental); 500.1358 (calculated). HPLC: R<sub>t</sub> = 6.95 min (Method B).

[Sc(L<sup>021</sup>)]<sup>2+</sup>

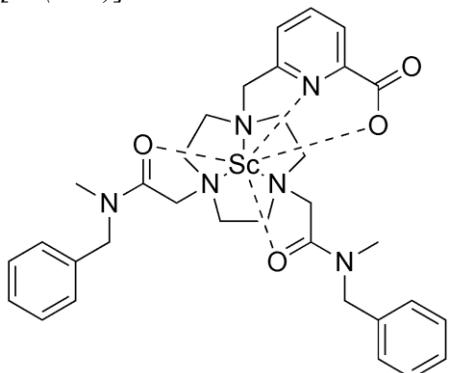

HL<sup>021</sup> (50.0 mg, 85.2 μmol, 1 equiv.); scandium(III) chloride hexahydrate (22.1 mg, 85.2 μmol, 1 equiv.). <sup>1</sup>H NMR (500 MHz, MeOD) δ 8.24 – 8.11 (m, 1H, Ar(Pa)), 8.10 – 7.98 (m, 1H, Ar(Pa)), 7.75 – 7.62 (m, 1H, Ar(Pa)), 7.44 – 7.11 (m, 10H, Ar(Bz)), 4.78 – 4.02 (m, 10H, CH<sub>2</sub>(Pa + Am + Bz)), 3.08 – 2.97 (m, 6H, CH<sub>3</sub>), 3.55 – 2.65 (m, 12H, tacn), 1.98 (s, 6H, OAc- counter anion). <sup>13</sup>C {<sup>1</sup>H} NMR (126 MHz, MeOD) δ 179.3, 176.7, 176.6, 176.5, 176.4, 176.3, 176.2, 171.3, 170.9, 157.9, 153.4, 153.2, 143.3, 143.1, 136.9, 136.3, 136.1, 135.7, 135.5, 130.4, 130.2, 129.9, 129.8, 129.7, 129.4, 129.1, 129.1, 128.8, 128.5, 128.4, 128.0, 127.8, 125.4, 124.3, 124.2, 124.1, 65.5, 65.3, 64.6, 64.3, 64.2, 64.1, 63.9, 63.8, 57.2, 57.1, 56.8, 56.7, 56.6, 56.0, 55.8, 55.5, 55.4, 55.2, 55.1, 55.0, 54.7, 54.4, 53.8, 53.6, 52.8, 52.1, 35.5, 35.4, 35.2, 25.3, 25.2, 21.3. <sup>45</sup>Sc NMR (122 MHz, MeOD) δ 76.2, 69.1. <sup>45</sup>Sc NMR (122 MHz, D<sub>2</sub>O) δ 87.5, 71.8. ESI-HRMS (+ve ion): [Sc(L<sup>021</sup>)]<sup>2+</sup> *m/z* = 315.1363 (experimental); 315.1369 (calculated). HPLC: R<sub>t</sub> = 9.30 min (Method B).

$[Sc(L^{012})]^+$

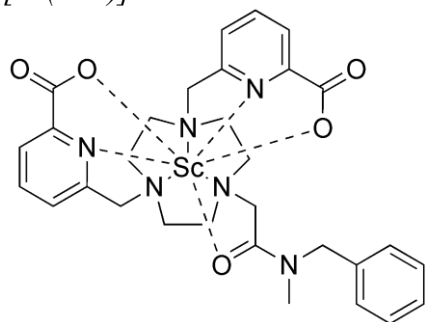

$H_2L^{012}$  (10.6 mg, 19.0  $\mu$ mol, 1 equiv.); scandium(III) chloride hexahydrate (4.93 mg, 19.0  $\mu$ mol, 1 equiv.).  $^1H$  NMR (500 MHz, MeOD)  $\delta$  8.20 – 7.53 (m, 6H, Ar(Pa)), 7.40 – 7.09 (m, 5H, Ar(Bz)), 4.66 – 3.59 (m, 10H,  $CH_2$ (Pa) +  $CH_2$ Bz) +  $CH_2$  (Am)), 3.60 – 2.62 (m, 12H, Ar(Pa)), 3.00 – 2.90 (m, 3H,  $CH_3$ ).  $^{13}C\{^1H\}$  NMR (126 MHz, MeOD)  $\delta$  172.3 (CO (Am)), 171.4 (CO (Am)), 163.2 (CO (Am)), 162.9 (CO (Am)), 156.6 ( $CH_2C$ (Pa)), 152.5 (CCO(Pa)), 143.1 (Ar(Pa)), 142.6 (Ar(Pa)), 139.2 (C(Bz)), 130.1 (Ar(Bz)), 129.8 (Ar(Bz)), 129.7 (Ar(Bz)), 129.1 (Ar(Bz)), 128.9 (Ar(Bz)), 128.7 (Ar(Bz)), 128.5 (Ar(Bz)), 128.4 (Ar(Bz)), 127.6 (Ar(Bz)), 127.1 (Ar(Bz)), 126.2 (Ar(Pa)), 126.1 (Ar(Pa)), 124.7 (Ar(Pa)), 124.3 (Ar(Pa)), 123.7 (Ar(Pa)), 67.0 ( $CH_2$ (Pa)), 66.6 ( $CH_2$ (Pa)), 66.0 ( $CH_2$ (Pa)), 65.0 ( $CH_2$  (Am)), 62.0 ( $CH_2$ (Pa)), 58.7 (tacn), 57.3 ( $CH_2$ (Bz)), 56.8 (tacn), 54.9 (tacn), 52.3 (tacn), 51.9 (tacn), 35.1 ( $CH_3$ (Am)), 34.7 ( $CH_3$ (Am)).  $^{45}Sc$  NMR (122 MHz, MeOD)  $\delta$  127.4, 73.3, 60.5, 43.4.  $^{45}Sc$  NMR (122 MHz,  $D_2O$ )  $\delta$  141.1, 81.0. ESI-HRMS (+ve ion):  $[Sc(L^{012})]^+$   $m/z$  = 603.2144 (experimental); 603.2144 (calculated). HPLC:  $R_t$  = 8.8 min (Method B).

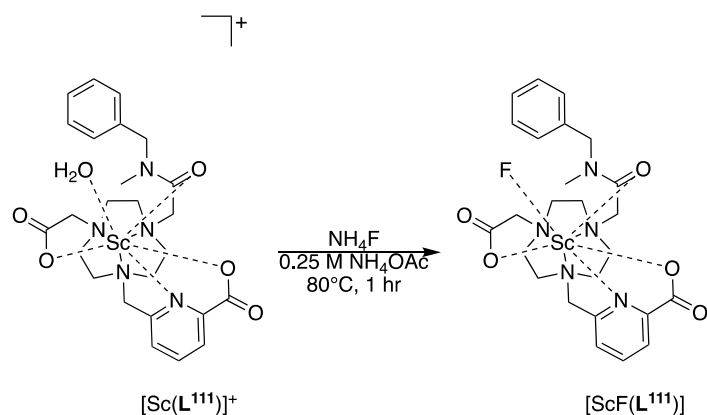

**Scheme S4:** General fluorination procedure.

### 1.3.2 General Fluorination Procedure

To a solution of complex in ammonium acetate (0.25 M, pH 4.5, 4 mL) was added cesium fluoride or ammonium fluoride and the reaction mixture was heated to 100 °C for 1 hour, then checked via LCMS to ensure complete fluorination. The scandium-fluoride ternary complexes were lyophilised and redissolved in acetonitrile to remove excess ammonium acetate and were used without further purification.

$[ScF(L^{201})]^-$

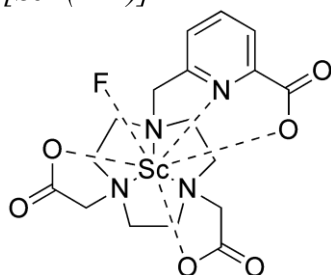

$[Sc(L^{201})]$  (17.6 mg, 41.7  $\mu$ mol, 1 equiv.); ammonium fluoride (7.73 mg, 209  $\mu$ mol, 5 equiv.).  $^1H$  NMR (500 MHz, MeOD)  $\delta$  8.14 – 8.07 (m, 1H, Ar(Pa)), 8.05 – 7.99 (m, 1H, Ar(Pa)), 7.63 – 7.55 (m, 1H, Ar(Pa)), 4.38 (s, 1H, CH<sub>2</sub>(Pa)), 4.35 (s, 1H, CH<sub>2</sub>(Pa)), 4.01 (d,  $J$  = 15.3 Hz, 1H, CH<sub>2</sub>(Ac)), 3.89 (d,  $J$  = 15.1 Hz, 1H, CH<sub>2</sub>(Ac)), 3.26 (d,  $J$  = 16.2 Hz, 2H, CH<sub>2</sub>(Ac)), 3.29 – 2.91 (m, 12H, tacn).  $^{13}C\{^1H\}$  NMR (126 MHz, MeOD)  $\delta$  180.2(CO(Ac)), 179.9 (CO(Ac)), 179.3 (CO(Ac)), 172.0 (CO(Pa)), 171.8 (CO(Pa)), 157.6 (CH<sub>2</sub>C(Pa)), 153.2 (CCO(Pa)), 153.1 (CCO(Pa)), 142.3 (Ar(Pa)), 142.0 (Ar(Pa)), 125.2 (Ar(Pa)), 125.1 (Ar(Pa)), 124.1 (Ar(Pa)), 67.2 (CH<sub>2</sub>(Ac)), 66.3 (CH<sub>2</sub>(Ac)), 65.3 (CH<sub>2</sub>(Pa)), 56.7 (tacn), 55.8 (tacn), 55.4 (tacn), 54.9 (tacn), 54.6 (tacn), 45.0 (tacn).  $^{45}Sc$  NMR (122 MHz, MeOD)  $\delta$  67.0.  $^{45}Sc$  NMR (122 MHz, D<sub>2</sub>O)  $\delta$  85.6.  $^{19}F$  NMR (564 MHz, MeOD)  $\delta$  -9.23. ESI-HRMS (+ve ion):  $[ScF(L^{201})+2H]^+$   $m/z$  = 443.1160 (experimental); 443.1155 (calculated). HPLC:  $R_t$  = 1.33 min (Method A).

[ScF(L<sup>111</sup>)]

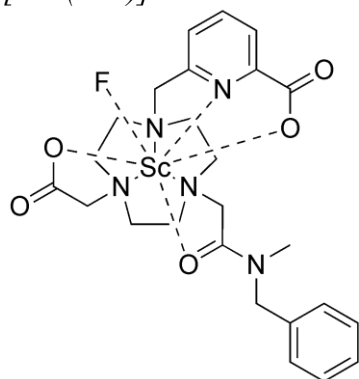

[Sc(L<sup>111</sup>)]<sup>+</sup> (5.27 mg, 10.0 μmol, 1 equiv.); ammonium fluoride (1.85 mg, 50.0 μmol, 5 equiv.). <sup>1</sup>H NMR (500 MHz, MeOD) δ 8.13 (t, J = 7.7 Hz, 0.8H, Ar(Pa)), 8.03 (t, J = 7.2 Hz, 0.8H, Ar(Pa)), 7.64 (d, J = 7.8 Hz, 0.8H, Ar(Pa)), 7.39 (t, J = 7.5 Hz, 0.2H, Ar(Pa)), 7.33 (t, J = 7.5 Hz, 0.2H, Ar(Pa)), 7.24 (d, J = 7.0 Hz, 0.2H, Ar(Pa)), 7.36 – 7.18 (m, 3.5H, Ar(Bz)), 6.99 – 6.92 (m, 1.5H, Ar(Bz)), 4.74 – 3.89 (m, 8H, CH<sub>2</sub>(Ac) + CH<sub>2</sub>(Pa) + CH<sub>2</sub>(Am) + CH<sub>2</sub>(Bz)), 3.59 – 2.66 (m, 12H, tacn), 3.07 (s, 3H, CH<sub>3</sub>). <sup>13</sup>C{<sup>1</sup>H} NMR (126 MHz, MeOD) δ 179.7, 176.1, 175.8, 171.5, 157.8, 153.2, 142.6, 136.6, 136.0, 130.2, 129.8, 129.3, 129.0, 128.1, 125.5, 124.1, 123.9, 65.7, 65.4, 65.1, 63.8, 56.5, 56.3, 56.2, 55.7, 55.3, 54.7, 54.3, 53.9, 53.7, 53.3, 36.0, 35.1. <sup>45</sup>Sc NMR (122 MHz, MeOD) δ 67.8. <sup>45</sup>Sc NMR (122 MHz, D<sub>2</sub>O) δ 68.3. <sup>19</sup>F NMR (564 MHz, MeOD) δ -5.65. ESI-HRMS (+ve ion): [ScF(L<sup>111</sup>)+H]<sup>+</sup> m/z = 546.1951 (experimental); 546.1941 (calculated). HPLC: R<sub>t</sub> = 8.27 min (Method B).

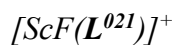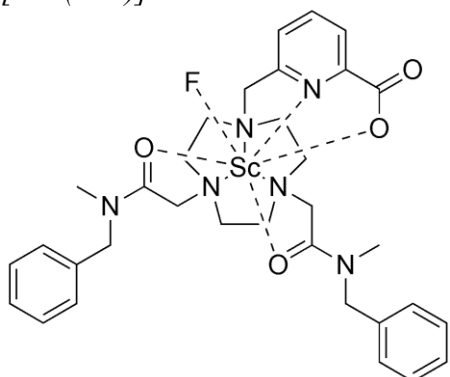

$[\text{Sc}(\mathbf{L}^{021})]^{2+}$  (24.3 mg, 38.6  $\mu\text{mol}$ , 1 equiv.); caesium fluoride (2.93 mg, 193  $\mu\text{mol}$ , 5 equiv.).  $^1\text{H}$  NMR (500 MHz, MeOD)  $\delta$  8.24 – 8.14 (m, 1H, Ar(Pa)), 8.11 – 8.02 (m, 1H, Ar(Pa)), 7.73 – 7.63 (m, 1H, Ar(Pa)), 7.42 – 7.11 (m, 10H, Ar(Bz)), 4.76 – 4.01 (m, 10H, Ar(Pa)), 3.11 – 3.00 (m, 6H, CH<sub>3</sub>), 3.60 – 2.78 (m, 12H, tacn).  $^{13}\text{C}\{^1\text{H}\}$  NMR (126 MHz, MeOD)  $\delta$  176.31, 176.24, 176.12, 171.63, 163.06, 162.79, 158.03, 157.82, 153.48, 143.36, 136.43, 136.22, 136.11, 135.52, 130.85, 130.33, 130.27, 130.20, 129.95, 129.87, 129.80, 129.65, 129.58, 129.53, 129.19, 129.06, 128.42, 128.16, 125.56, 125.33, 124.32, 124.23, 119.42, 117.09, 65.49, 65.37, 65.13, 64.26, 63.71, 57.12, 56.74, 56.06, 55.85, 55.47, 55.21, 54.37, 53.85, 53.75, 35.68, 35.42, 35.27, 33.07.  $^{45}\text{Sc}$  NMR (122 MHz, MeOD)  $\delta$  75.4.  $^{45}\text{Sc}$  NMR (122 MHz, D<sub>2</sub>O)  $\delta$  86.2, 76.0.  $^{19}\text{F}$  NMR (564 MHz, MeOD)  $\delta$  2.52, 1.58. ESI-HRMS (+ve ion):  $[\text{ScF}(\mathbf{L}^{021})]^+$   $m/z$  = 649.2733 (experimental); 649.2727 (calculated). HPLC:  $R_t$  = 8.93 min (Method D).

$\text{Lu}(\mathbf{L}^{201})$  was prepared according to a literature procedure.<sup>1</sup>

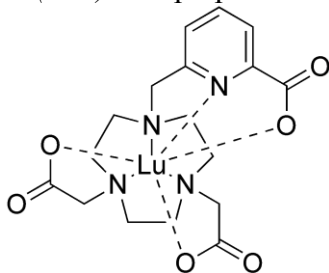

$[Lu(L^{111})]^+$

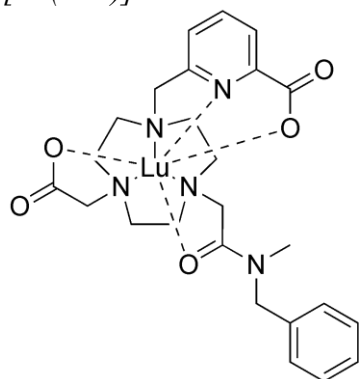

To a solution of  $H_2L^{111}$  (1.93 mg, 4.00  $\mu$ mol, 1 equiv.) in water (2 mL) was added lutetium(III) chloride hexahydrate (2.34 mg, 6.00  $\mu$ mol, 1.5 equiv.) and the reaction mixture was heated to 80  $^{\circ}C$  for 1 hour, then checked via LCMS to ensure complete complexation. The lutetium complex was isolated and analyzed as crude product.  $^1H$  NMR (500 MHz, MeOD)  $\delta$  8.13 (t,  $J = 7.7$  Hz, 0.8H, Ar(Pa)), 8.03 (t,  $J = 7.2$  Hz, 0.8H, Ar(Pa)), 7.64 (d,  $J = 7.8$  Hz, 0.8H, Ar(Pa)), 7.39 (t,  $J = 7.5$  Hz, 0.2H, Ar(Pa)), 7.33 (t,  $J = 7.5$  Hz, 0.2H, Ar(Pa)), 7.24 (d,  $J = 7.0$  Hz, 0.2H, Ar(Pa)), 7.36 – 7.18 (m, 3.5H, Ar(Bz)), 6.99 – 6.92 (m, 1.5H, Ar(Bz)), 4.74 – 3.89 (m, 8H,  $CH_2(Ac) + CH_2(Pa) + CH_2(Am) + CH_2(Bz)$ ), 3.59 – 2.66 (m, 12H, tacn), 3.07 (s, 3H,  $CH_3$ ).  $^{13}C\{^1H\}$  NMR (126 MHz, MeOD)  $\delta$  181.18, 180.05, 175.07, 172.08, 157.26, 150.59, 142.56, 135.52, 129.14, 128.73, 127.65, 127.04, 126.80, 125.57, 123.60, 115.15, 64.06, 63.39, 62.75, 55.36, 55.16, 54.37, 53.85, 53.18, 51.82, 51.06, 36.55, 22.93. ESI-HRMS (+ve ion):  $[Lu(L^{111})]^+$   $m/z = 656.1721$  (experimental); 656.1728 (calculated). HPLC:  $R_t = 6.46, 6.76$  min (Method A).

## 1.4 Ultraviolet-Visible Spectroscopy Data

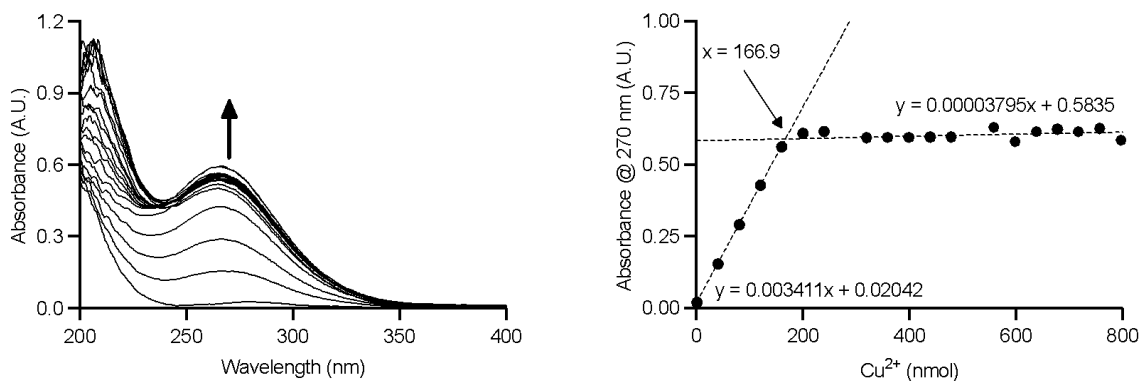

**Figure S1.** Spectrophotometric titration of H<sub>3</sub>L<sup>300</sup> (H<sub>3</sub>nota) with Cu<sup>2+</sup>. UV-vis absorbance spectra of H<sub>3</sub>L<sup>300</sup> (H<sub>3</sub>nota) upon Cu<sup>2+</sup> addition (left) and UV-vis titration to endpoint to determine ligand concentration (right).

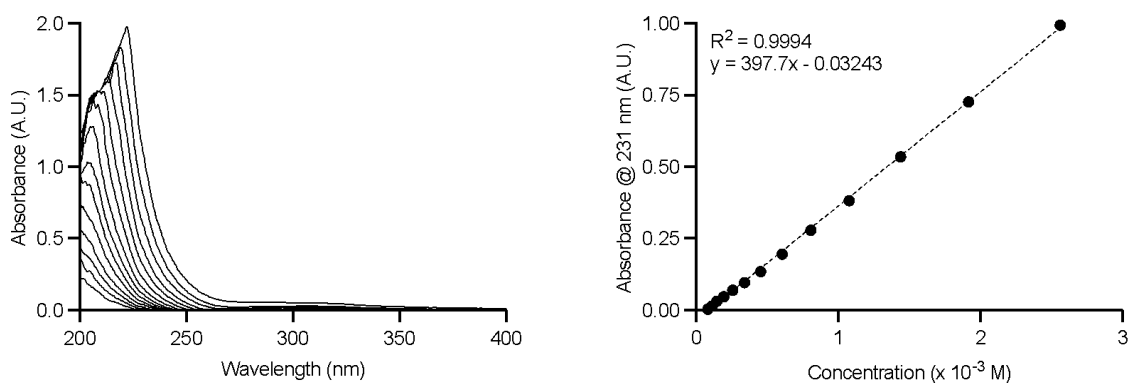

**Figure S2.** UV-vis analysis of H<sub>3</sub>L<sup>300</sup> (H<sub>3</sub>nota) to determine molar extinction coefficient. UV-vis absorbance spectra of H<sub>3</sub>L<sup>300</sup> (H<sub>3</sub>nota) at decreasing concentration (left) and analysis of spectra at 231 nm used to determine the molar extinction coefficient (right).

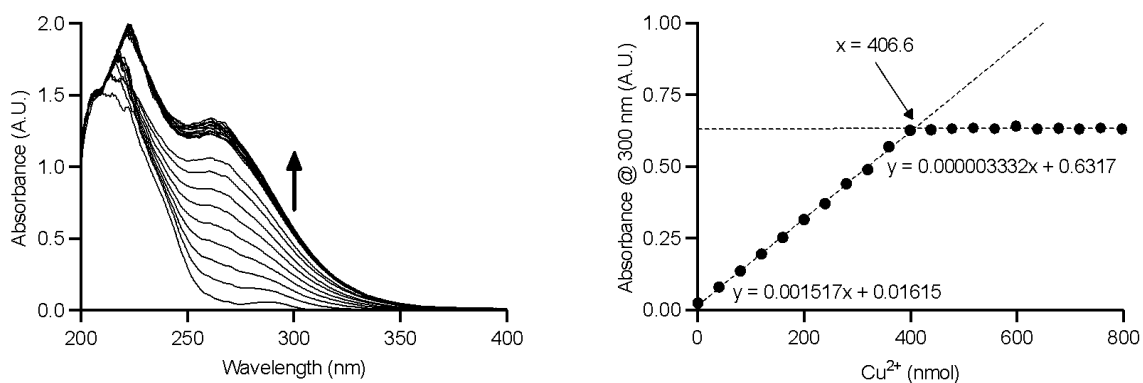

**Figure S3.** Spectrophotometric titration of  $H_3L^{300-NBzNH_2}$  with  $Cu^{2+}$ . UV-vis absorbance spectra of  $H_3L^{300-BzNH_2}$  upon  $Cu^{2+}$  addition (left) and UV-vis titration to endpoint to determine ligand concentration (right).

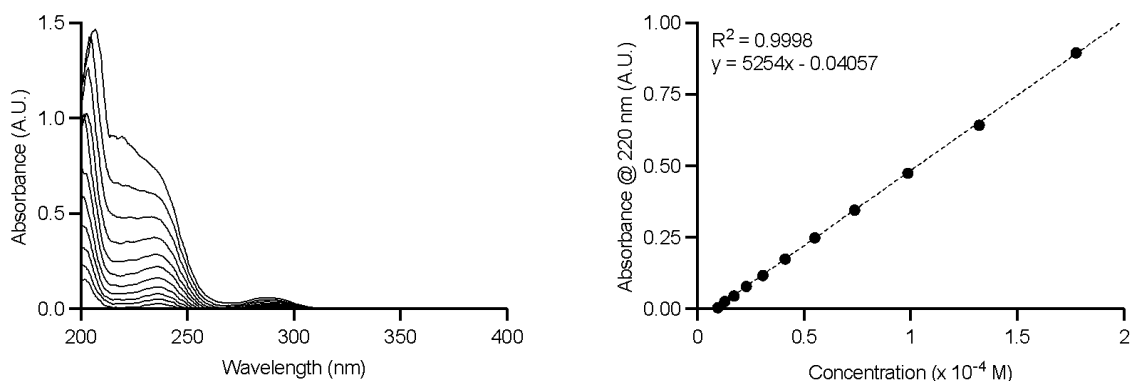

**Figure S4.** UV-vis analysis of  $H_3L^{300-BzNH_2}$  to determine molar extinction coefficient. UV-vis absorbance spectra of  $H_3L^{300-BzNH_2}$  at decreasing concentration (left) and analysis of spectra at 231 nm used to determine the molar extinction coefficient (right).

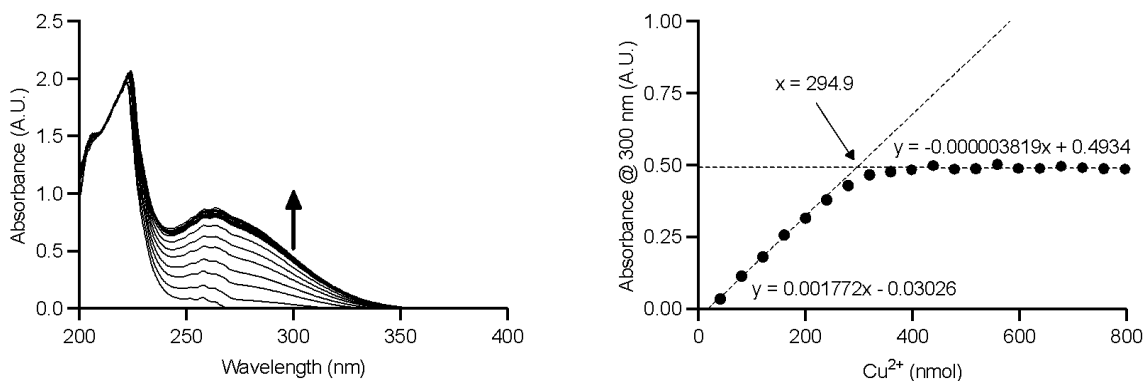

**Figure S5.** Spectrophotometric titration of  $L^{030}$  with  $Cu^{2+}$ . UV-vis absorbance spectra of  $L^{030}$  upon  $Cu^{2+}$  addition (left) and UV-vis titration to endpoint to determine ligand concentration (right).



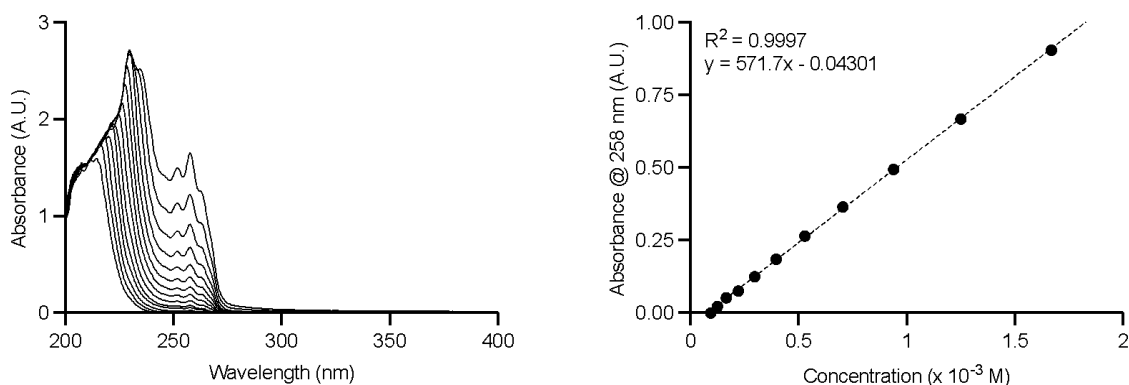

**Figure S6.** UV-vis analysis of  $L^{030}$  to determine molar extinction coefficient. UV-vis absorbance spectra of  $L^{030}$  at decreasing concentration (left) and analysis of spectra at 258 nm used to determine the molar extinction coefficient (right).

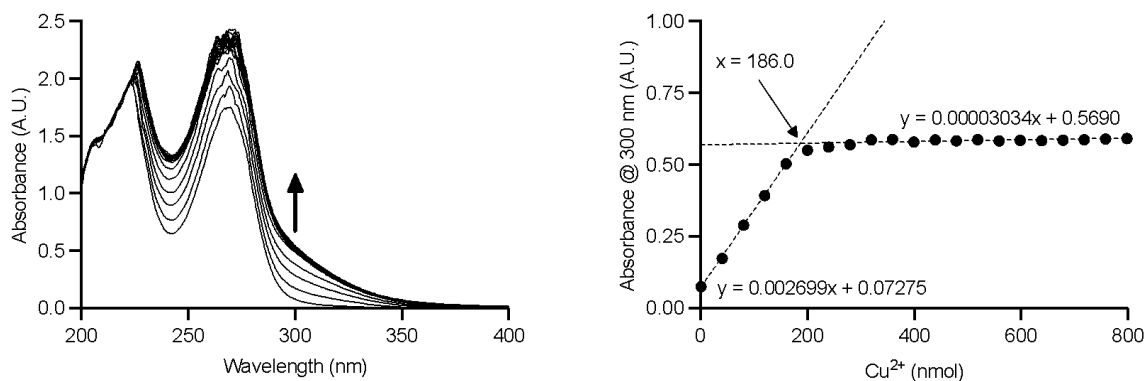

**Figure S7.** Spectrophotometric titration of  $H_3L^{003}$  with  $Cu^{2+}$ . UV-vis absorbance spectra of  $H_3L^{003}$  upon  $Cu^{2+}$  addition (left) and UV-vis titration to endpoint to determine ligand concentration (right).

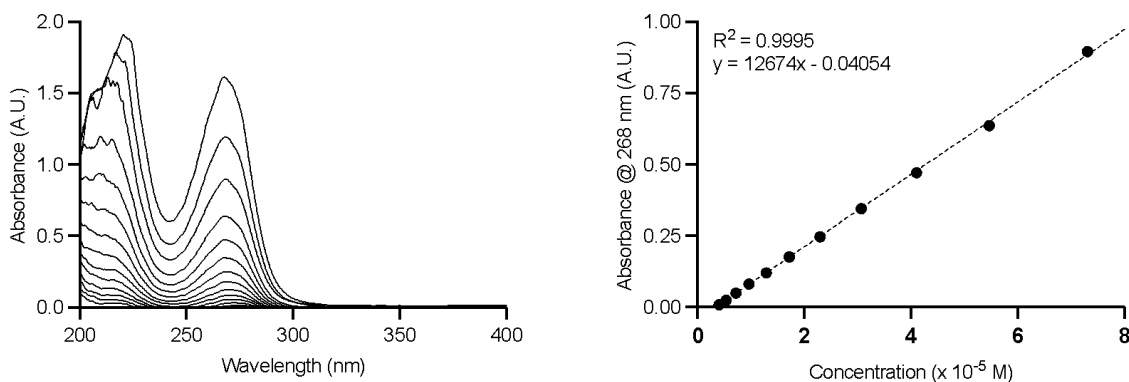

**Figure S8.** UV-vis analysis of  $H_3L^{003}$  to determine molar extinction coefficient. UV-vis absorbance spectra of  $H_3L^{003}$  at decreasing concentration (left) and analysis of spectra at 268 nm used to determine the molar extinction coefficient (right).

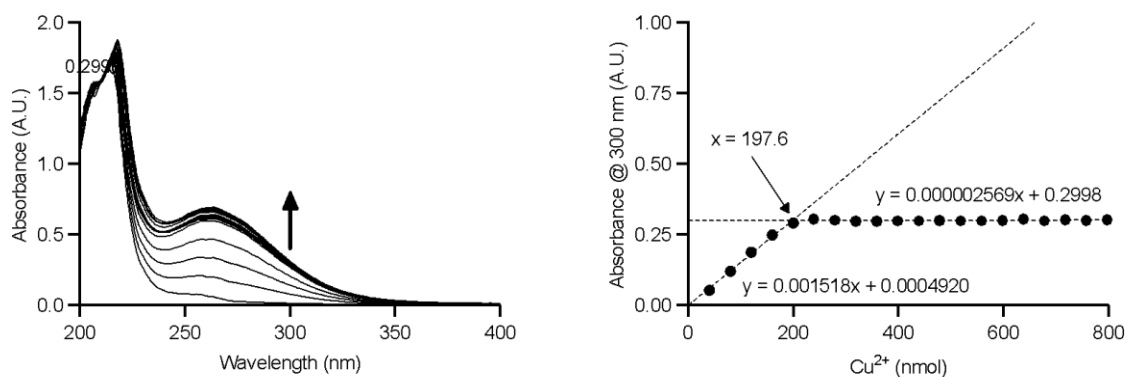

**Figure S9.** Spectrophotometric titration of  $\text{H}_2\text{L}^{210}$  with  $\text{Cu}^{2+}$ . UV-vis absorbance spectra of  $\text{H}_2\text{L}^{210}$  upon  $\text{Cu}^{2+}$  addition (left) and UV-vis titration to endpoint to determine ligand concentration (right).

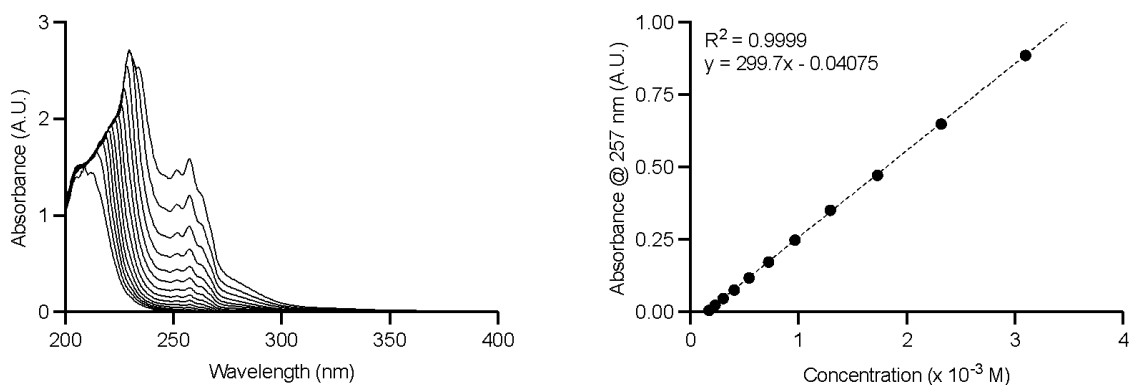

**Figure S10.** UV-vis analysis of  $\text{H}_2\text{L}^{210}$  to determine molar extinction coefficient. UV-vis absorbance spectra of  $\text{H}_2\text{L}^{210}$  at decreasing concentration (left) and analysis of spectra at 257 nm used to determine the molar extinction coefficient (right).

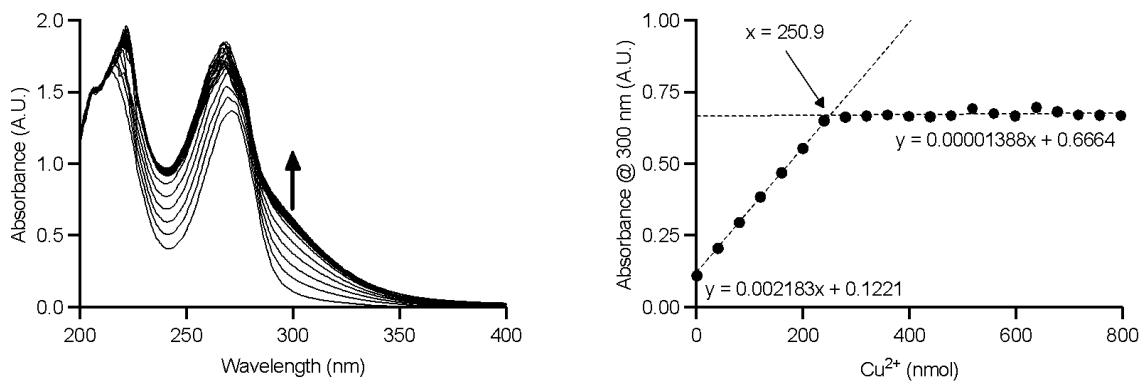

**Figure S11.** Spectrophotometric titration of  $\text{H}_3\text{L}^{201}$  ( $\text{H}_3\text{mpatcn}$ ) with  $\text{Cu}^{2+}$ . UV-vis absorbance spectra of  $\text{H}_3\text{L}^{201}$  ( $\text{H}_3\text{mpatcn}$ ) upon  $\text{Cu}^{2+}$  addition (left) and UV-vis titration to endpoint to determine ligand concentration (right).

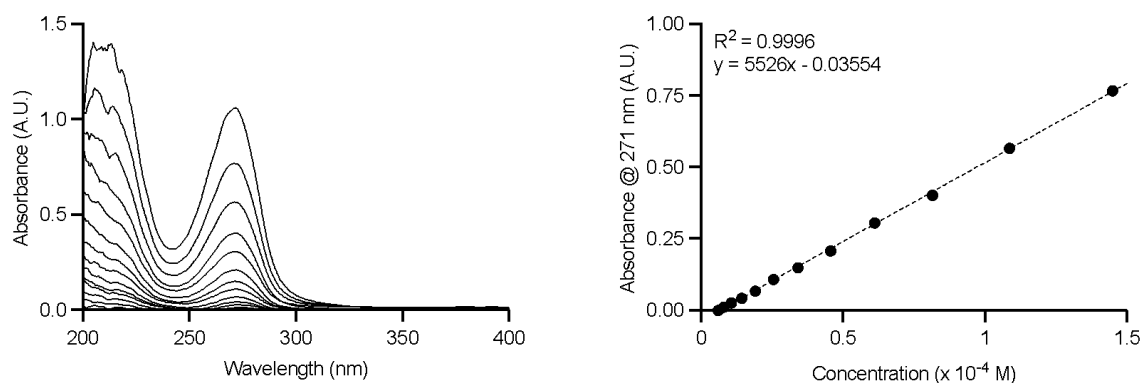

**Figure S12.** UV-vis analysis of  $H_3L^{201}$  ( $H_3mpatcn$ ) to determine molar extinction coefficient. UV-vis absorbance spectra of  $H_3L^{201}$  ( $H_3mpatcn$ ) at decreasing concentration (left) and analysis of spectra at 271 nm used to determine the molar extinction coefficient (right).

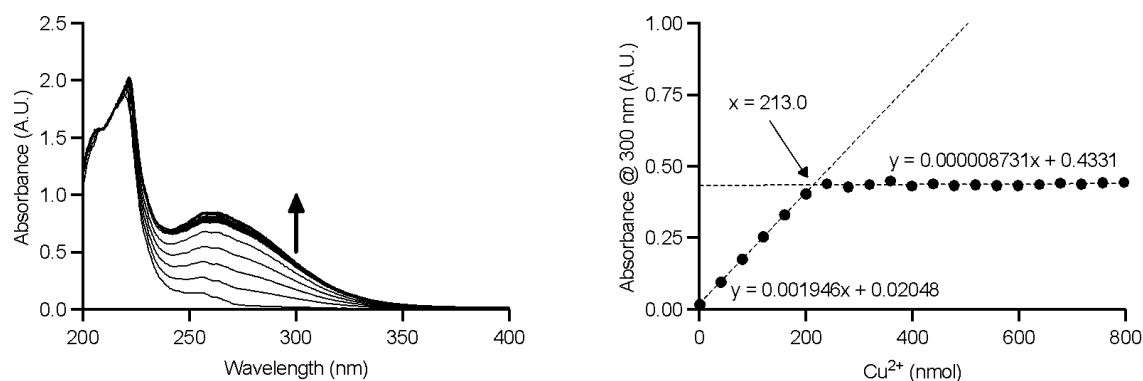

**Figure S13.** Spectrophotometric titration of  $HL^{120}$  with  $Cu^{2+}$ . UV-vis absorbance spectra of  $HL^{120}$  upon  $Cu^{2+}$  addition (left) and UV-vis titration to endpoint to determine ligand concentration (right).

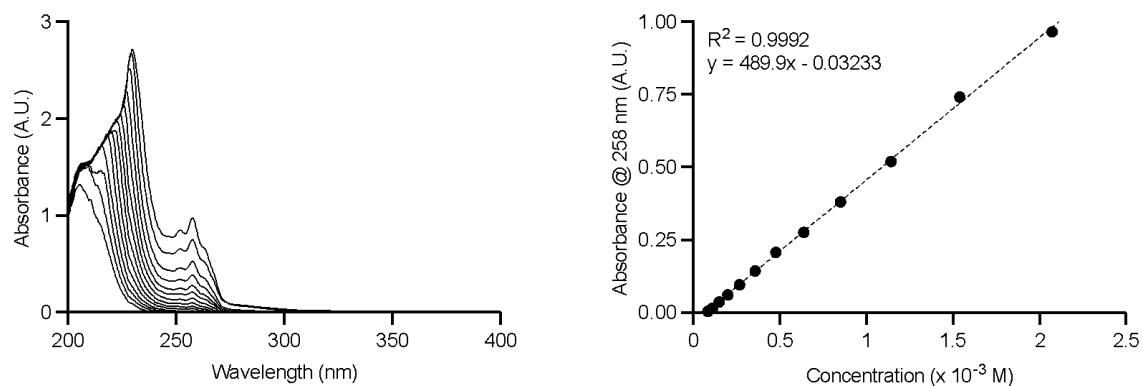

**Figure S14.** UV-vis analysis of  $HL^{120}$  to determine molar extinction coefficient. UV-vis absorbance spectra of  $HL^{120}$  at decreasing concentration (left) and analysis of spectra at 258 nm used to determine the molar extinction coefficient (right).

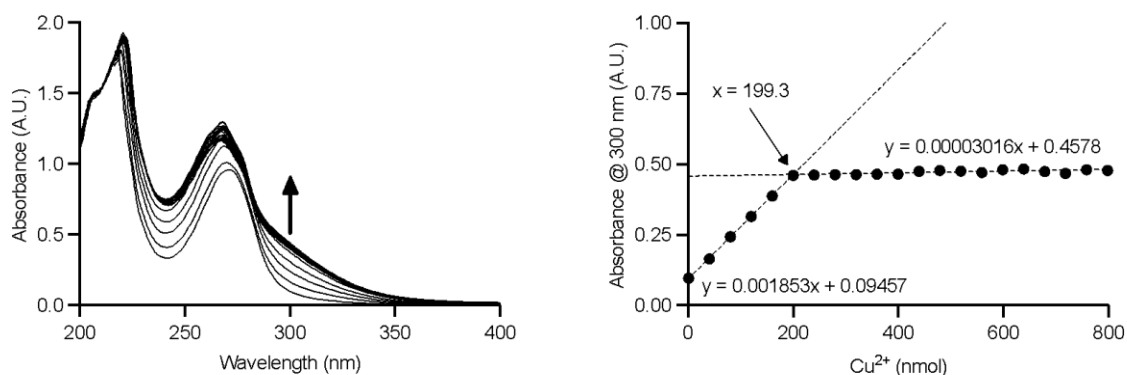

**Figure S15.** Spectrophotometric titration of  $\text{H}_2\text{L}^{111}$  with  $\text{Cu}^{2+}$ . UV-vis absorbance spectra of  $\text{H}_2\text{L}^{111}$  upon  $\text{Cu}^{2+}$  addition (left) and UV-vis titration to endpoint to determine ligand concentration (right).

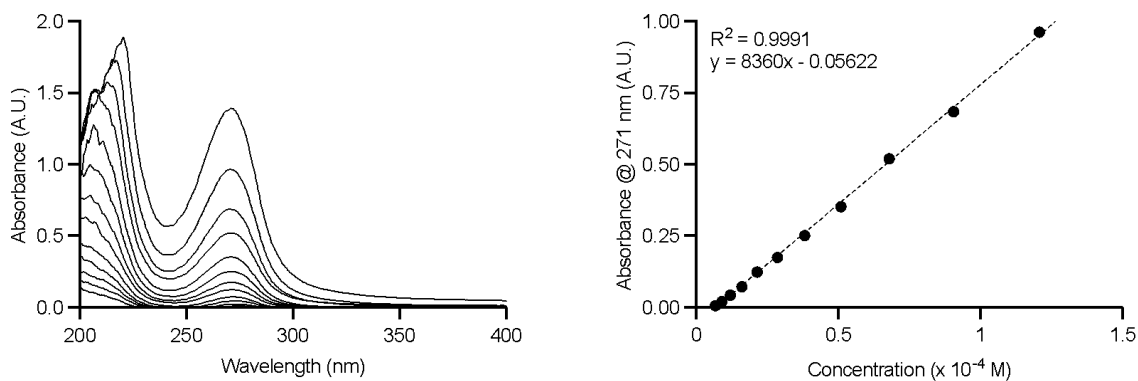

**Figure S16.** UV-vis analysis of  $\text{H}_2\text{L}^{111}$  to determine molar extinction coefficient. UV-vis absorbance spectra of  $\text{H}_2\text{L}^{111}$  at decreasing concentration (left) and analysis of spectra at 271 nm used to determine the molar extinction coefficient (right).

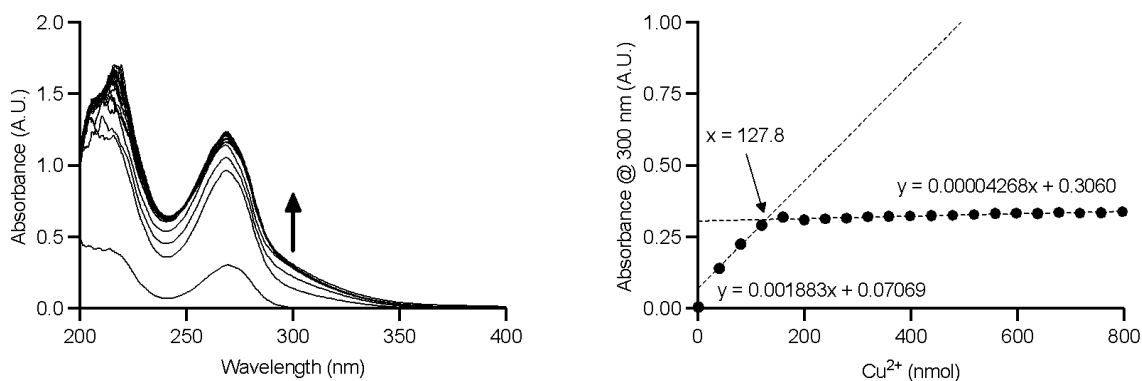

**Figure S17.** Spectrophotometric titration of  $\text{H}_3\text{L}^{102}$  with  $\text{Cu}^{2+}$ . UV-vis absorbance spectra of  $\text{H}_3\text{L}^{102}$  upon  $\text{Cu}^{2+}$  addition (left) and UV-vis titration to endpoint to determine ligand concentration (right).

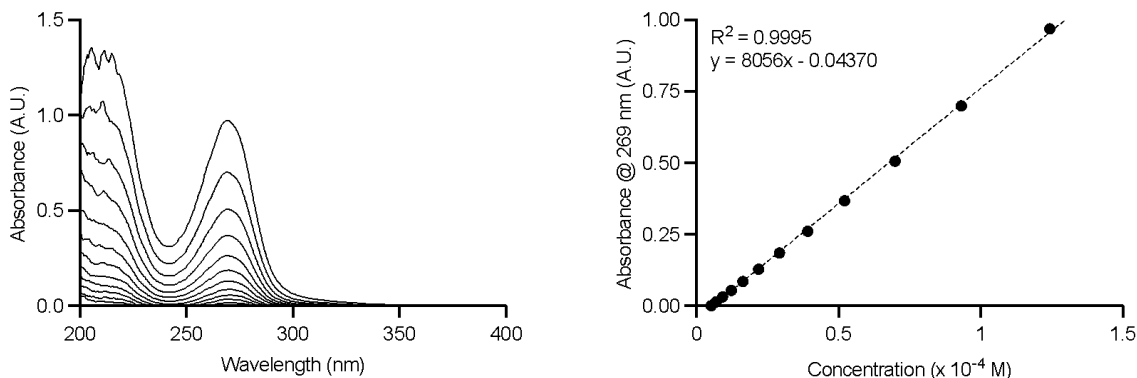

**Figure S18.** UV-vis analysis of  $H_3L^{102}$  to determine molar extinction coefficient. UV-vis absorbance spectra of  $H_3L^{102}$  at decreasing concentration (left) and analysis of spectra at 269 nm used to determine the molar extinction coefficient (right).

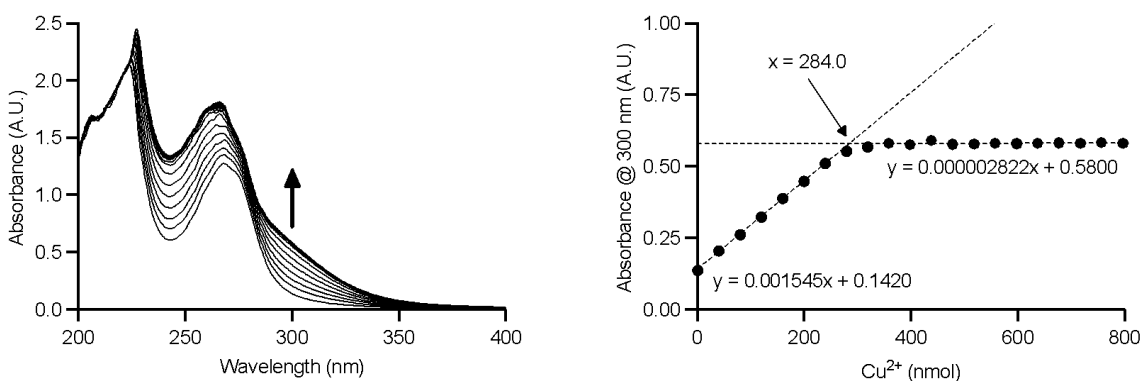

**Figure S19.** Spectrophotometric titration of  $HL^{021}$  with  $Cu^{2+}$ . UV-vis absorbance spectra of  $HL^{021}$  upon  $Cu^{2+}$  addition (left) and UV-vis titration to endpoint to determine ligand concentration (right).

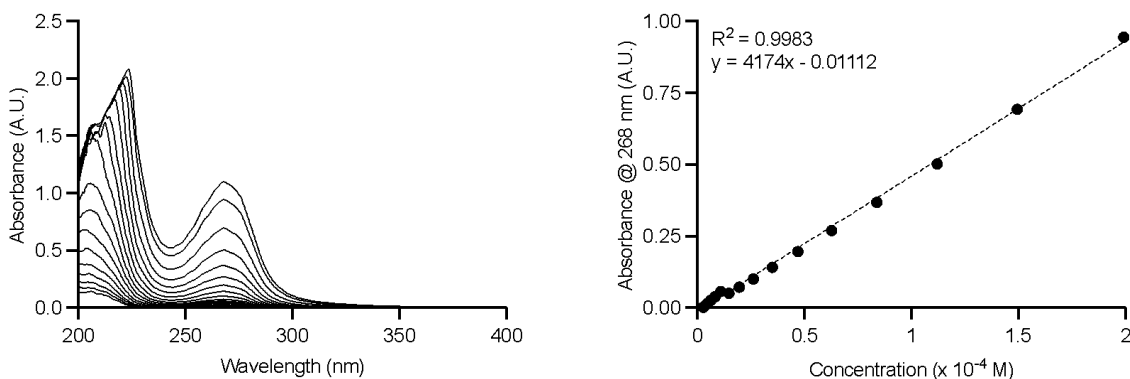

**Figure S20.** UV-vis analysis of  $HL^{021}$  to determine molar extinction coefficient. UV-vis absorbance spectra of  $HL^{021}$  at decreasing concentration (left) and analysis of spectra at 268 nm used to determine the molar extinction coefficient (right).

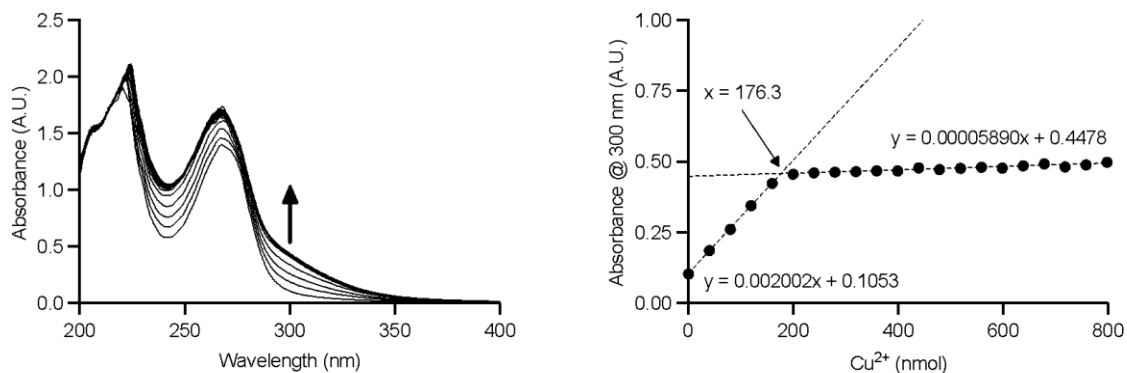

**Figure S21.** Spectrophotometric titration of  $\text{H}_2\text{L}^{012}$  with  $\text{Cu}^{2+}$ . UV-vis absorbance spectra of  $\text{H}_2\text{L}^{012}$  upon  $\text{Cu}^{2+}$  addition (left) and UV-vis titration to endpoint to determine ligand concentration (right).

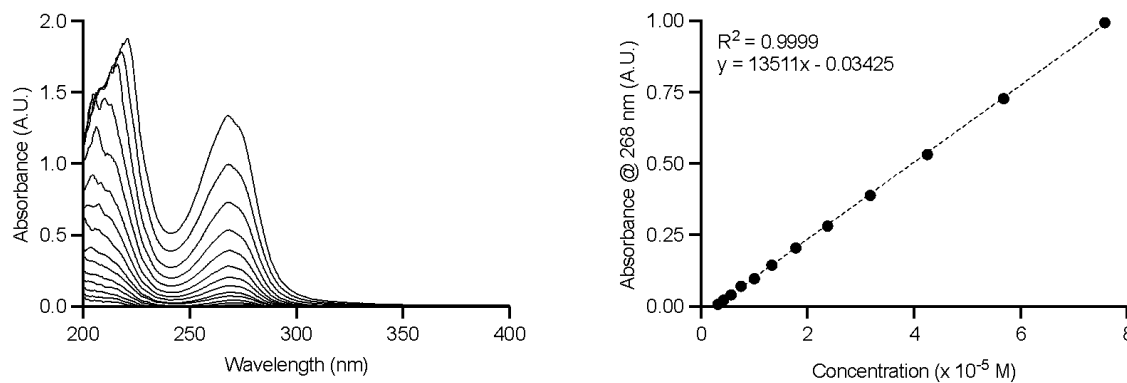

**Figure S22.** UV-vis analysis of  $\text{H}_2\text{L}^{012}$  to determine molar extinction coefficient. UV-vis absorbance spectra of  $\text{H}_2\text{L}^{012}$  at decreasing concentration (left) and analysis of spectra at 268 nm used to determine the molar extinction coefficient (right).

## 1.5 Computational Chemistry

Density Functional Theory calculations were performed using the *Gaussian16*, Revision A.03 software package. Computations were performed with the B3LYP-D3(BJ) functional and cc-pVDZ basis set. Calculations were performed using the SMD implicit solvation model (water), and structures for refinement were derived from crystal structures where available.

Calculations were performed without symmetry constraints as geometry optimizations with frequency calculations (OPT FREQ) using the B3LYP-D3(BJ) functional and cc-pVDZ basis set with SMD integral equation formalism polarizable continuum model (IEFPCM) solvation.

Sc-L and ScF-L interaction energies were calculated using the following formula.

Enthalpy of Sc(L)/ScF(L) – Enthalpy of constrained L – Enthalpy of constrained Sc<sup>3+</sup>/ScF<sup>2+</sup>

Sc-X (X = OH<sub>2</sub>, OH<sup>-</sup>, or F<sup>-</sup>) bond dissociation energies were calculated using the following formula.

Enthalpy of Sc(L) + Enthalpy of X – Enthalpy of ScX(L)

**Table S1.** DFT calculated enthalpies and interaction energies of all ligand systems investigated.

| Complex                               | Enthalpy (kJ/mol) |                     |                     |                    | Interaction       | Energy |
|---------------------------------------|-------------------|---------------------|---------------------|--------------------|-------------------|--------|
|                                       | X = $\Phi$        | X = OH <sub>2</sub> | X = OH <sup>-</sup> | X = F <sup>-</sup> | ScF-L<br>(kJ/mol) | Sc-L   |
| $\Delta$ -ScXL <sup>300</sup>         | -4843096          | -5043757            | -5042533            | -5105694           | -726              | -      |
| $\Delta$ -ScXL <sup>300</sup>         | -4843095          | -5043757            | -5042533            | -5105694           | -725              | -      |
| $\Delta$ -ScXL <sup>210</sup>         | -4998324          | -5198992            | -5197779            | -5260937           | -664              | -      |
| $\Lambda$ - ScXL <sup>210</sup>       | -4998324          | -5198992            | -5197779            | -5260937           | -664              | -      |
| $\Delta$ -ScXL <sup>120</sup>         | -5153553          | -5354221            | -5353019            | -5416177           | -611              | -      |
| $\Lambda$ -ScXL <sup>120</sup>        | -5153553          | -5354221            | -5353019            | -5416177           | -611              | -      |
| $\Delta$ -ScXL <sup>030</sup>         | -5308772          | -5509447            | -5508260            | -5571414           | -537              | -      |
| $\Delta$ -ScXL <sup>030</sup>         | -5308773          | -5509457            | -5508258            | -5571414           | -543              | -      |
| $\Delta$ -ScXL <sup>201</sup>         | -5491780          | -5692415            | -5691188            | -5754337           | -713              | -      |
| $\Lambda$ - ScXL <sup>201</sup>       | -5491780          | -5692415            | -5691188            | -5754337           | -713              | -      |
| M- $\Delta$ -<br>ScXL <sup>111</sup>  | -5647010          | -5847653            | -5846435            | -5909588           | -667              | -889   |
| M- $\Lambda$ -<br>ScXL <sup>111</sup> | -5647018          | -5847659            | -5846436            | -5909590           | -648              | -886   |
| P- $\Delta$ -<br>ScXL <sup>111</sup>  | -5647018          | -5847660            | -5846436            | -5909590           | -648              | -886   |
| P- $\Lambda$ -<br>ScXL <sup>111</sup> | -5647010          | -5847653            | -5846435            | -5909588           | -667              | -889   |
| $\Delta$ -ScXL <sup>021</sup>         | -5802244          | -6002892            | -6001682            | -6064835           | -608              | -      |
| $\Lambda$ -ScXL <sup>021</sup>        | -5802246          | -6002892            | -6001682            | -6064835           | -605              | -      |
| $\Delta$ -ScXL <sup>102</sup>         | -6140453          | -6341116            | -6339859            | -6403015           | -719              | -      |
| $\Lambda$ -ScXL <sup>102</sup>        | -6140453          | -6341116            | -6339859            | -6403015           | -719              | -      |
| $\Delta$ -ScXL <sup>012</sup>         | -6295693          | -6496350            | -6495155            | -6558305           | -688              | -      |
| $\Lambda$ -ScXL <sup>012</sup>        | -6295693          | -6496351            | -6495155            | -6558305           | -688              | -      |
| $\Delta$ -ScXL <sup>003</sup>         | -6789144          | -6989741            | -6988540            | -7051679           | -627              | -      |
| $\Lambda$ -ScXL <sup>003</sup>        | -6789144          | -6989735            | -6988525            | -7051682           | -622              | -      |

**Table S2.** DFT calculated bond dissociation energies and relevant bond lengths of all ligand systems investigated.

| Complex                     | BDE (kJ/mol)        |                     |                    | Bond Lengths (Å)   |       |
|-----------------------------|---------------------|---------------------|--------------------|--------------------|-------|
|                             | X = OH <sub>2</sub> | X = OH <sup>-</sup> | X = F <sup>-</sup> | Sc-OH <sub>2</sub> | Sc-F  |
| Δ-ScXL <sup>300</sup>       | 54                  | 219                 | 270                | 2.349              | 1.967 |
| Δ-ScXL <sup>300</sup>       | 54                  | 218                 | 271                | 2.350              | 1.967 |
| Δ-ScXL <sup>210</sup>       | 60                  | 236                 | 285                | 2.334              | 1.957 |
| Λ- ScXL <sup>210</sup>      | 60                  | 236                 | 285                | 2.334              | 1.957 |
| Δ-ScXL <sup>120</sup>       | 63                  | 250                 | 299                | 2.322              | 1.952 |
| Λ-ScXL <sup>120</sup>       | 60                  | 247                 | 296                | 2.324              | 1.952 |
| Δ-ScXL <sup>030</sup>       | 67                  | 269                 | 314                | 2.285              | 1.941 |
| Δ-ScXL <sup>030</sup>       | 77                  | 266                 | 313                | 2.247              | 1.940 |
| Δ-ScXL <sup>201</sup>       | 27                  | 189                 | 229                | 2.354              | 1.958 |
| Λ- ScXL <sup>201</sup>      | 27                  | 189                 | 229                | 2.354              | 1.958 |
| M-Δ-<br>ScXL <sup>111</sup> | 34                  | 206                 | 250                | 2.311              | 1.951 |
| M-Λ-<br>ScXL <sup>111</sup> | 34                  | 199                 | 244                | 2.337              | 1.954 |
| P-Δ-<br>ScXL <sup>111</sup> | 34                  | 199                 | 244                | 2.337              | 1.954 |
| P-Λ-<br>ScXL <sup>111</sup> | 35                  | 206                 | 251                | 2.311              | 1.951 |
| Δ-ScXL <sup>021</sup>       | 40                  | 219                 | 263                | 2.324              | 1.949 |
| Λ-ScXL <sup>021</sup>       | 39                  | 218                 | 262                | 2.324              | 1.948 |
| Δ-ScXL <sup>102</sup>       | -                   | 186                 | 234                | -                  | 1.963 |
| Λ-ScXL <sup>102</sup>       | -                   | 186                 | 234                | -                  | 1.964 |
| Δ-ScXL <sup>012</sup>       | -                   | 243                 | 284                | -                  | 1.937 |
| Λ-ScXL <sup>012</sup>       | -                   | 243                 | 284                | -                  | 1.937 |
| Δ-ScXL <sup>003</sup>       | -                   | 177                 | 207                | -                  | 1.927 |
| Λ-ScXL <sup>003</sup>       | -                   | 162                 | 210                | -                  | 1.924 |



**Table S3.** RMSD analysis comparing the XRD and DFT optimized structures of [Sc(L<sup>003</sup>)].

|                                      | XRD    | DFT    |
|--------------------------------------|--------|--------|
| Mean Bond Distances [Å]              |        |        |
| M-N <sub>tacn</sub>                  | 2.564  | 2.659  |
| M-N <sub>py</sub>                    | 2.426  | 2.412  |
| M-O                                  | 2.206  | 2.212  |
| Mean Plane Distances [Å]             |        |        |
| N <sub>tacn</sub> -N <sub>py</sub>   | 2.014  | 2.067  |
| N <sub>tacn</sub> -O                 | 3.401  | 3.538  |
| N <sub>py</sub> -O                   | 1.387  | 1.471  |
| N <sub>tacn</sub> -M                 | 1.960  | 2.072  |
| Mean Torsion [°]                     |        |        |
| N <sub>tacn</sub> -N <sub>tacn</sub> | -45.95 | -46.15 |
| N <sub>tacn</sub> -N <sub>py</sub>   | 43.70  | 44.19  |
| N <sub>tacn</sub> -O                 | 103.83 | 103.73 |
| N <sub>py</sub> -O                   | 60.15  | 59.54  |
| RMSD = 0.1946 Å                      |        |        |

## 1.6 Chiral Separation

$[\text{Sc}(\text{L}^{111})]^+$  was prepared as described in section 1.3. The complex was then redissolved in MeOH to prepare the final solution that was used for chiral separation. Separations were performed using analytical HPLC method E.

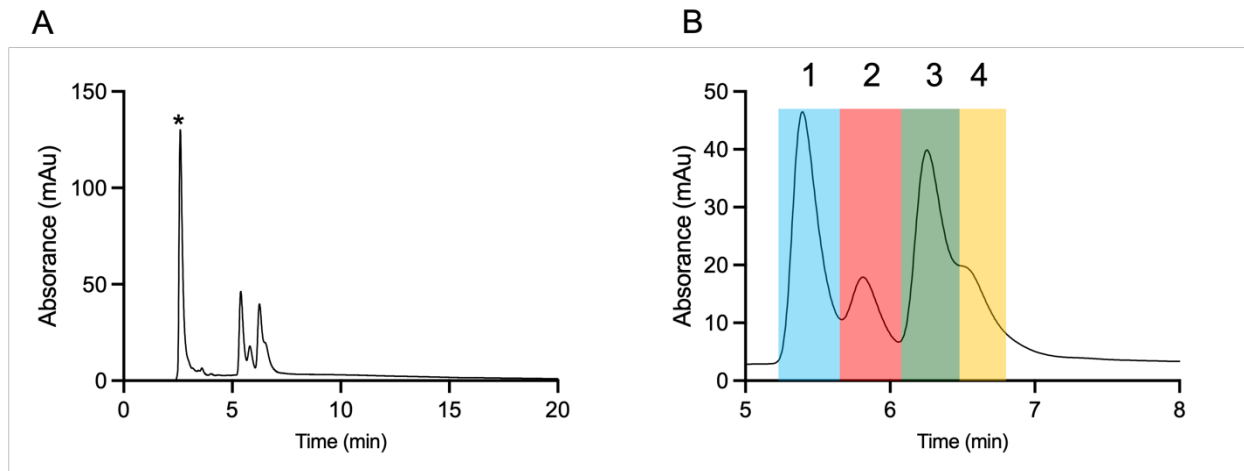

**Figure S23.** A) Chiral analytical HPLC trace of  $[\text{Sc}(\text{L}^{111})]^+$  (Method E). B) Enhanced portion of HPLC trace to highlight the 4 metallo-atropoisomers.

**Table S4.** Tabulated % isomer present of the 4  $[\text{Sc}(\text{L}^{111})]^+$  isomers observed.

| Species                         | % isomer present |
|---------------------------------|------------------|
| Metallo-atropoisomer 1 (Blue)   | ~34%             |
| Metallo-atropoisomer 2 (Red)    | ~14%             |
| Metallo-atropoisomer 3 (Green)  | ~34%             |
| Metallo-atropoisomer 4 (Yellow) | ~18%             |

## 1.7 Radiolabeling Data

### 1.7.1 General $^{18}\text{F}$ Radiolabeling Procedure

Radiolabeling was conducted following a literature procedure.<sup>2</sup> To an aqueous solution of ammonium acetate (50  $\mu\text{L}$ , 1 M, pH 4.8) was added an aliquot of unprocessed [ $^{18}\text{F}$ ]F<sup>-</sup> stock (110-143  $\mu\text{L}$ , ~1 mCi) followed by an aliquot of a  $\text{ScCl}_3 \cdot 6\text{H}_2\text{O}$  stock solution (2-20  $\mu\text{L}$ , 20 nmol) of known concentration as determined by ICP-OES or MP-AES. Following incubation at room temperature for 10 minutes, an aliquot of a ligand stock solution (5-20  $\mu\text{L}$ , 100 nmol), of known concentration as determined UV-vis spectroscopy, was added. Total reaction volume = 200  $\mu\text{L}$ . The mixtures were incubated at 80 °C for 30 min prior to radioHPLC analysis (Method C). The same procedure was used for animal studies.

### 1.7.2 General $^{44}\text{Sc}/^{177}\text{Lu}$ Radiolabeling Procedure

Radiolabeling was conducted following a literature procedure.<sup>2</sup> To an aqueous solution of ammonium acetate (10  $\mu\text{L}$ , 1 M, pH 4.8) was added ligand stock solution (16-54  $\mu\text{L}$ , 10 nmol), of known concentration as determined UV-vis spectroscopy, followed by an aliquot of the [ $^{44}\text{Sc}$ ]ScCl<sub>3</sub> or [ $^{177}\text{Lu}$ ]LuCl<sub>3</sub> stock (36-74  $\mu\text{L}$ , ~0.1 mCi). Total reaction volume = 100  $\mu\text{L}$ . The mixtures were incubated at 80 °C for 30 min prior to radioTLC (developed with 50 mM Na<sub>2</sub>EDTA) and radioHPLC analyses ( $^{44}\text{Sc}$ : Method B;  $^{177}\text{Lu}$ : Method A). For radioTLC, activity with an R<sub>f</sub> of ~0 was considered to be the desired radiolabeled complex, and activity with a R<sub>f</sub> of ~1 was considered to be free  $^{44}\text{Sc}^{3+}$  or  $^{177}\text{Lu}^{3+}$  respectively.

### 1.7.3 $^{44}\text{Sc}/^{177}\text{Lu}$ Animal Studies Radiolabeling Procedure

To an aqueous solution of ammonium acetate (20  $\mu\text{L}$ , 1 M, pH 4.8) was added ligand stock solution (2-17  $\mu\text{L}$ , 100 nmol), of known concentration as determined UV-vis spectroscopy, followed by an aliquot of the [ $^{44}\text{Sc}$ ]ScCl<sub>3</sub> or [ $^{177}\text{Lu}$ ]LuCl<sub>3</sub> stock (163-178  $\mu\text{L}$ , ~1 mCi). Total reaction volume = 200  $\mu\text{L}$ . The mixtures were incubated at 80 °C for 30 min prior to radioTLC (developed with 50 mM Na<sub>2</sub>EDTA) and radioHPLC analyses ( $^{44}\text{Sc}$ : Method B;  $^{177}\text{Lu}$ : Method A).

### 1.7.4 Metabolite Analysis

Metabolite analysis was performed by analyzing 100  $\mu\text{L}$  of mouse urine collected during biodistribution studies via radioHPLC. In cases where less than 100  $\mu\text{L}$  of urine was collected, the urine was diluted with 1X PBS to a total volume of 100  $\mu\text{L}$ . In cases where the total activity was below the sensitivity of the radio detector, fractions were collected every 30 seconds, activity in each fraction was quantified using a gamma counter, and the trace was reconstructed.

**Table S5.** Tabulated radiochemical conversion values for the radiochemical syntheses performed in this research. Data are represented at mean and standard deviation of triplicate results from radioTLC or radioHPLC analyses. \*Triplicate results gave the same value. \*\*Duplicate results

| <b>Ligand</b>                         | <b><sup>18</sup>F</b> | <b><sup>44</sup>Sc</b> | <b><sup>177</sup>Lu</b> |
|---------------------------------------|-----------------------|------------------------|-------------------------|
| H <sub>3</sub> L <sup>300</sup>       | -                     | 98.6 ± 0.3             | 81.3 ± 4.9              |
| H <sub>3</sub> L <sup>300-BzNH2</sup> | 2.1 ± 0.2             | 95.4 ± 4.1**           | 99.0*                   |
| L <sup>030</sup>                      | -                     | 81.4 ± 2.0             | 8.8 ± 0.5               |
| H <sub>3</sub> L <sup>003</sup>       | -                     | 95.6 ± 3.0             | 97.5 ± 2.2              |
| H <sub>2</sub> L <sup>210</sup>       | 7.9 ± 0.3             | 91.5 ± 2.3             | 62.0 ± 1.3              |
| H <sub>3</sub> L <sup>201</sup>       | 33.3 ± 0.8            | 99.1 ± 0.4             | 99.3 ± 0.6              |
| HL <sup>120</sup>                     | 13.0 ± 1.2            | 96.7 ± 0.2             | 94.8 ± 1.3              |
| H <sub>2</sub> L <sup>111</sup>       | 36.7 ± 3.3            | 97.5 ± 0.4             | 90.2 ± 0.9              |
| H <sub>3</sub> L <sup>102</sup>       | -                     | 95.1 ± 0.7             | 99.0 ± 1.8              |
| HL <sup>021</sup>                     | 19.0 ± 0.6            | 96.0 ± 1.9             | 83.0 ± 1.0              |
| H <sub>2</sub> L <sup>012</sup>       | -                     | 92.5 ± 3.6             | 98.9 ± 0.7              |

**Table S6.** Biodistributions of [ $^{18}\text{F}$ ]F $^-$  and [ $^{18}\text{F}$ ]ScF-acetate as measured by % ID/g in BALB/c mice (n = 3-5) at 1 hour post-injection (mean % ID/g  $\pm$  standard deviation). Outliers removed using a Grubb's test with 95% confidence interval. \*Duplicate results gave the same value.

|                 | [ $^{18}\text{F}$ ]F $^-$ | [ $^{18}\text{F}$ ]ScF-acetate |
|-----------------|---------------------------|--------------------------------|
| urine           | -                         | -                              |
| blood           | 0.30 $\pm$ 0.14           | 0.58 $\pm$ 0.08                |
| heart           | 0.28 $\pm$ 0.04           | 0.59 $\pm$ 0.08                |
| lungs           | 0.19 $\pm$ 0.06           | 0.69*                          |
| liver           | 0.17*                     | 4.6 $\pm$ 0.50                 |
| spleen          | 0.16 $\pm$ 0.02           | 2.49 $\pm$ 0.40                |
| kidneys         | 0.38 $\pm$ 0.04           | 0.97 $\pm$ 0.11                |
| stomach         | 0.09 $\pm$ 0.02           | 0.18*                          |
| small intestine | 0.58 $\pm$ 0.30           | 0.61 $\pm$ 0.01                |
| large intestine | 1.77 $\pm$ 0.57           | 1.76 $\pm$ 0.72                |
| muscle          | 0.32 $\pm$ 0.18           | 0.52 $\pm$ 0.17                |
| bone            | 11.97 $\pm$ 3.51          | 17.60 $\pm$ 3.81               |
| brain           | 0.13 $\pm$ 0.06           | 0.22 $\pm$ 0.14                |

**Table S7.** Biodistributions of [ $^{18}\text{F}$ ][ScF(L $^{201}$ )] $^-$ , [ $^{18}\text{F}$ ][ScF(L $^{111}$ )], [ $^{18}\text{F}$ ][ScF(L $^{210}$ )], and [ $^{18}\text{F}$ ][ScF(L $^{120}$ )] $^+$  as measured by % ID/g in BALB/c mice (n = 3-5) at 1 hour post-injection (mean % ID/g  $\pm$  standard deviation). Outliers removed using a Grubb's test with 95% confidence interval. \*Duplicate results gave the same value.

|                 | [ $^{18}\text{F}$ ][ScF(L $^{201}$ )] $^-$ | [ $^{18}\text{F}$ ][ScF(L $^{111}$ )] | [ $^{18}\text{F}$ ][ScF(L $^{210}$ )] | [ $^{18}\text{F}$ ][ScF(L $^{120}$ )] $^+$ |
|-----------------|--------------------------------------------|---------------------------------------|---------------------------------------|--------------------------------------------|
| urine           | -                                          | 219.50 $\pm$ 56.42                    | -                                     | -                                          |
| blood           | 0.64 $\pm$ 0.29                            | 0.35 $\pm$ 0.13                       | 0.34 $\pm$ 0.33                       | 0.11 $\pm$ 0.03                            |
| heart           | 0.26 $\pm$ 0.06                            | 0.10 $\pm$ 0.04                       | 0.11 $\pm$ 0.04                       | 0.12 $\pm$ 0.03                            |
| lungs           | 0.25 $\pm$ 0.03                            | 0.23 $\pm$ 0.06                       | 0.18 $\pm$ 0.1                        | 0.18 $\pm$ 0.02                            |
| liver           | 0.48 $\pm$ 0.06                            | 0.85 $\pm$ 0.31                       | 2.53 $\pm$ 0.63                       | 0.62 $\pm$ 0.24                            |
| spleen          | 0.09 $\pm$ 0.03                            | 0.98 $\pm$ 0.39                       | 0.17 $\pm$ 0.07                       | 0.15 $\pm$ 0.02                            |
| kidneys         | 3.16 $\pm$ 0.85                            | 1.47 $\pm$ 0.32                       | 1.90 $\pm$ 0.91                       | 0.43 $\pm$ 0.06                            |
| stomach         | 0.09 $\pm$ 0.05                            | 0.08 $\pm$ 0.02                       | 0.10 $\pm$ 0.04                       | 0.06 $\pm$ 0.03                            |
| small intestine | 0.44 $\pm$ 0.12                            | 0.60 $\pm$ 0.11                       | 7.09 $\pm$ 5.9                        | 15.93 $\pm$ 7.20                           |
| large intestine | 0.10 $\pm$ 0.02                            | 0.07 $\pm$ 0.01                       | 0.31 $\pm$ 0.22                       | 0.30 $\pm$ 0.02                            |
| muscle          | 0.06 $\pm$ 0.05                            | 0.04 $\pm$ 0.01                       | 0.11 $\pm$ 0.05                       | 0.11 $\pm$ 0.05                            |
| bone            | 0.20 $\pm$ 0.16                            | 0.27 $\pm$ 0.20                       | 1.50 $\pm$ 0.37                       | 2.48 $\pm$ 0.31                            |
| brain           | -                                          | 0.03 $\pm$ 0.01                       | 0.06 $\pm$ 0.04                       | 0.03 $\pm$ 0.01                            |

**Table S8.** Biodistributions of  $[^{44}\text{Sc}]\text{Sc-acetate}$ ,  $[^{44}\text{Sc}][\text{Sc}(\text{L}^{201})]$ ,  $[^{44}\text{Sc}][\text{Sc}(\text{L}^{111})]^+$ , and  $[^{44}\text{Sc}][\text{Sc}(\text{L}^{021})]^{2+}$  as measured by % ID/g in BALB/c mice (n = 3-5) at 1 hour post-injection (mean % ID/g  $\pm$  standard deviation). Outliers removed using a Grubb's test with 95% confidence interval.

|                 | $[^{44}\text{Sc}]\text{Sc-acetate}$ | $[^{44}\text{Sc}][\text{Sc}(\text{L}^{201})]$ | $[^{44}\text{Sc}][\text{Sc}(\text{L}^{111})]^+$ | $[^{44}\text{Sc}][\text{Sc}(\text{L}^{021})]^+$ |
|-----------------|-------------------------------------|-----------------------------------------------|-------------------------------------------------|-------------------------------------------------|
| urine           | 4.82 $\pm$ 0.70                     | 1456.72 $\pm$ 466.15                          | 1536.91 $\pm$ 199.86                            | 561.04 $\pm$ 316.95                             |
| blood           | 17.04 $\pm$ 0.85                    | 0.57 $\pm$ 0.08                               | 0.39 $\pm$ 0.03                                 | 2.17 $\pm$ 0.68                                 |
| heart           | 5.13 $\pm$ 0.11                     | 0.41 $\pm$ 0.11                               | 0.21 $\pm$ 0.02                                 | 0.68 $\pm$ 0.09                                 |
| lungs           | 8.72 $\pm$ 1.46                     | 1.06 $\pm$ 0.27                               | 0.88 $\pm$ 0.08                                 | 1.39 $\pm$ 0.20                                 |
| liver           | 24.51 $\pm$ 3.13                    | 0.75 $\pm$ 0.09                               | 2.00 $\pm$ 0.17                                 | 6.24 $\pm$ 2.37                                 |
| spleen          | 8.56 $\pm$ 0.43                     | 0.69 $\pm$ 0.09                               | 0.47 $\pm$ 0.07                                 | 0.69 $\pm$ 0.06                                 |
| kidneys         | 6.53 $\pm$ 0.01                     | 3.48 $\pm$ 1.29                               | 2.85 $\pm$ 0.82                                 | 2.72 $\pm$ 0.36                                 |
| stomach         | 1.85 $\pm$ 0.08                     | 0.27 $\pm$ 0.05                               | 0.50 $\pm$ 0.52                                 | 1.09 $\pm$ 0.50                                 |
| small intestine | 2.45 $\pm$ 0.27                     | 0.38 $\pm$ 0.08                               | 2.28 $\pm$ 0.44                                 | 35.09 $\pm$ 14.76                               |
| large intestine | 1.00 $\pm$ 0.08                     | 0.20 $\pm$ 0.05                               | 0.19 $\pm$ 0.04                                 | 1.53 $\pm$ 0.66                                 |
| muscle          | 0.70 $\pm$ 0.06                     | 0.25 $\pm$ 0.07                               | 0.20 $\pm$ 0.03                                 | 0.28 $\pm$ 0.06                                 |
| bone            | 2.36 $\pm$ 0.78                     | 1.17 $\pm$ 0.33                               | 0.49 $\pm$ 0.05                                 | 0.68 $\pm$ 0.22                                 |
| brain           | 0.60 $\pm$ 0.06                     | 0.14 $\pm$ 0.08                               | 0.06 $\pm$ 0.01                                 | 0.08 $\pm$ 0.03                                 |

**Table S9.** Biodistributions of  $[^{44}\text{Sc}][\text{Sc}(\text{L}^{300})]$ ,  $[^{44}\text{Sc}][\text{Sc}(\text{L}^{210})]^+$ , and  $[^{44}\text{Sc}][\text{Sc}(\text{L}^{120})]^{2+}$  as measured by % ID/g in BALB/c mice (n = 5) at 1 hour post-injection (mean % ID/g  $\pm$  standard deviation). Outliers removed using a Grubb's test with 95% confidence interval.

|                 | $[^{44}\text{Sc}][\text{Sc}(\text{L}^{300})]$ | $[^{44}\text{Sc}][\text{Sc}(\text{L}^{210})]^+$ | $[^{44}\text{Sc}][\text{Sc}(\text{L}^{120})]^{2+}$ |
|-----------------|-----------------------------------------------|-------------------------------------------------|----------------------------------------------------|
| urine           | 195.09 $\pm$ 273.27                           | 356.34 $\pm$ 247.69                             | 153.37 $\pm$ 103.81                                |
| blood           | 0.28 $\pm$ 0.05                               | 3.22 $\pm$ 0.11                                 | 1.45 $\pm$ 0.45                                    |
| heart           | 0.10 $\pm$ 0.02                               | 1.12 $\pm$ 0.23                                 | 0.49 $\pm$ 0.05                                    |
| lungs           | 0.22 $\pm$ 0.04                               | 1.69 $\pm$ 0.14                                 | 1.23 $\pm$ 0.19                                    |
| liver           | 0.21 $\pm$ 0.03                               | 2.34 $\pm$ 0.20                                 | 9.75 $\pm$ 1.23                                    |
| spleen          | 0.09 $\pm$ 0.02                               | 0.94 $\pm$ 0.11                                 | 2.62 $\pm$ 0.31                                    |
| kidneys         | 1.54 $\pm$ 0.38                               | 3.58 $\pm$ 0.24                                 | 6.14 $\pm$ 1.03                                    |
| stomach         | 0.80 $\pm$ 1.01                               | 1.06 $\pm$ 0.38                                 | 2.61 $\pm$ 0.80                                    |
| small intestine | 0.17 $\pm$ 0.08                               | 1.54 $\pm$ 0.18                                 | 8.56 $\pm$ 0.97                                    |
| large intestine | 0.06 $\pm$ 0.01                               | 0.31 $\pm$ 0.06                                 | 0.26 $\pm$ 0.04                                    |
| muscle          | 0.07 $\pm$ 0.02                               | 0.22 $\pm$ 0.03                                 | 0.17 $\pm$ 0.03                                    |
| bone            | 0.26 $\pm$ 0.08                               | 0.69 $\pm$ 0.01                                 | 0.42 $\pm$ 0.15                                    |
| brain           | 0.04 $\pm$ 0.02                               | 0.13 $\pm$ 0.01                                 | 0.09 $\pm$ 0.03                                    |



**Table S10.** Biodistributions of [ $^{177}\text{Lu}$ ]Lu-acetate, [ $^{177}\text{Lu}$ ][Lu(L $^{201}$ )], and [ $^{177}\text{Lu}$ ][Lu(L $^{111}$ )] $^{+}$  as measured by % ID/g in BALB/c mice (n = 3-5) at 1 hour post-injection (mean % ID/g  $\pm$  standard deviation). Outliers removed using a Grubb's test with 95% confidence interval.

|                 | [ $^{177}\text{Lu}$ ]Lu-acetate | [ $^{177}\text{Lu}$ ][Lu(L $^{201}$ )] | [ $^{177}\text{Lu}$ ][Lu(L $^{111}$ )] $^{+}$ |
|-----------------|---------------------------------|----------------------------------------|-----------------------------------------------|
| urine           | 33.17 $\pm$ 15.41               | 836.64 $\pm$ 217.87                    | 151.35 $\pm$ 98.05                            |
| blood           | 3.11 $\pm$ 0.61                 | 0.47 $\pm$ 0.19                        | 0.68 $\pm$ 0.08                               |
| heart           | 1.92 $\pm$ 0.29                 | 0.22 $\pm$ 0.09                        | 0.26 $\pm$ 0.03                               |
| lungs           | 4.36 $\pm$ 0.40                 | 0.49 $\pm$ 0.14                        | 0.91 $\pm$ 0.07                               |
| liver           | 68.53 $\pm$ 9.08                | 0.72 $\pm$ 0.11                        | 2.37 $\pm$ 0.11                               |
| spleen          | 16.89 $\pm$ 3.73                | 0.24 $\pm$ 0.06                        | 0.33 $\pm$ 0.01                               |
| kidneys         | 3.42 $\pm$ 0.28                 | 7.14 $\pm$ 1.65                        | 10.69 $\pm$ 2.05                              |
| stomach         | 1.29 $\pm$ 0.63                 | 0.36 $\pm$ 0.06                        | 0.73 $\pm$ 0.17                               |
| small intestine | 1.16 $\pm$ 0.06                 | 0.49 $\pm$ 0.3                         | 1.82 $\pm$ 0.06                               |
| large intestine | 0.42 $\pm$ 0.05                 | 0.17 $\pm$ 0.06                        | 0.22 $\pm$ 0.03                               |
| muscle          | 0.53 $\pm$ 0.04                 | 0.18 $\pm$ 0.05                        | 0.18 $\pm$ 0.02                               |
| bone            | 4.07 $\pm$ 1.52                 | 0.51 $\pm$ 0.22                        | 0.43 $\pm$ 0.05                               |
| brain           | 0.10 $\pm$ 0.01                 | 0.04 $\pm$ 0.01                        | 0.08 $\pm$ 0.05                               |

### 1.7.5 HPLC Chromatograms

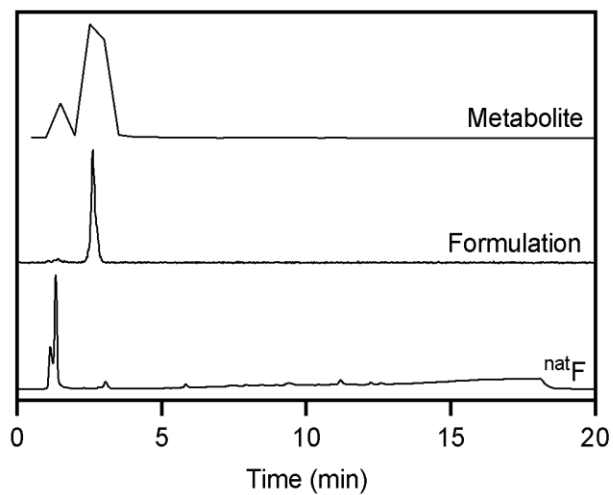

**Figure S24.** The RP-HPLC (Method A) analyses of [ $^{nat}\text{F}$ ][ScF(L<sup>201</sup>)]<sup>-</sup>, [ $^{18}\text{F}$ ][ScF(L<sup>201</sup>)]<sup>-</sup> formulation, and urine metabolite.

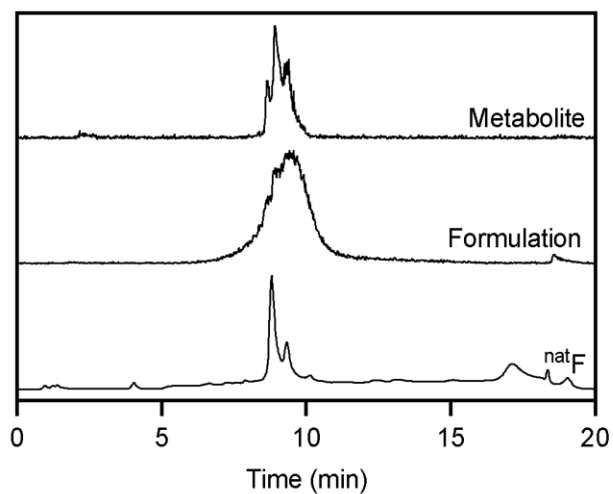

**Figure S25.** The RP-HPLC (Method C) analyses of [ $^{nat}\text{F}$ ][ScF(L<sup>111</sup>)], [ $^{18}\text{F}$ ][ScF(L<sup>111</sup>)], formulation, and urine metabolite.

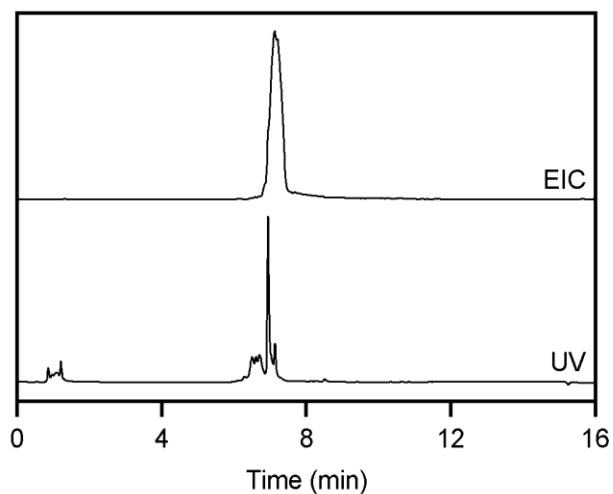

**Figure S26.** The UV (254 nm) and extracted ion ( $m/z = 545-547$ ) LCMS (Method G) chromatograms of  $[\text{ScF}(\text{L}^{111})]$ .

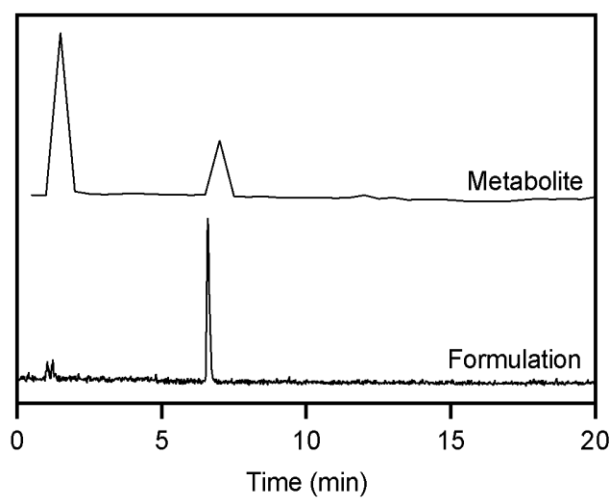

**Figure S27.** The RP-radioHPLC (Method A) analyses of the  $[\text{}^{18}\text{F}][\text{ScF}(\text{L}^{210})]$  formulation and urine metabolite.

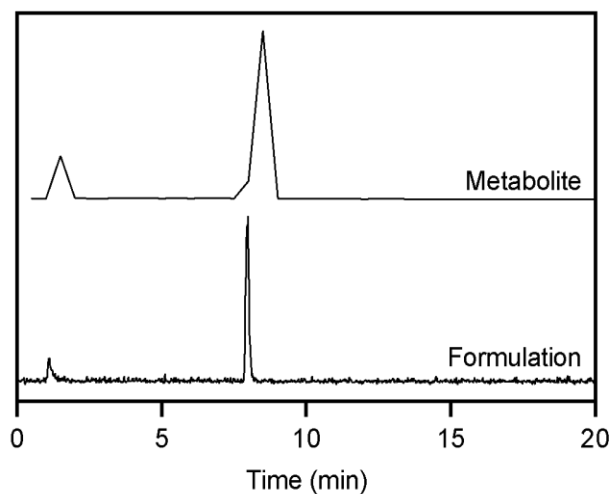

**Figure S28.** The RP-radioHPLC (Method A) analyses of the  $[^{18}\text{F}][\text{ScF}(\text{L}^{120})]^+$  formulation and urine metabolite.

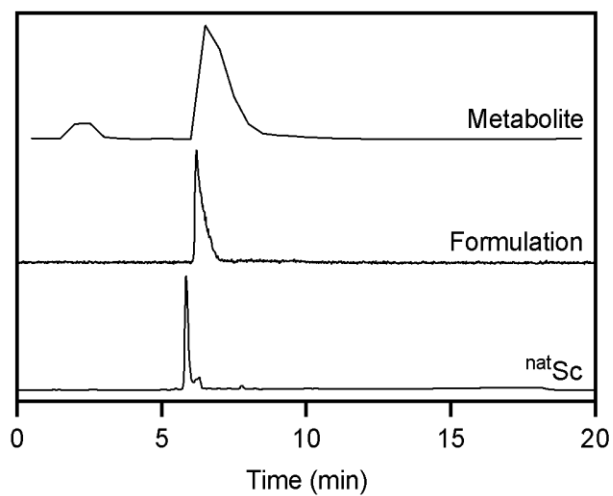

**Figure S29.** The RP-HPLC (Method B) analyses of  $[^{\text{nat}}\text{Sc}][\text{Sc}(\text{L}^{201})]$ ,  $[^{44}\text{Sc}][\text{Sc}(\text{L}^{201})]$  formulation, and urine metabolite.

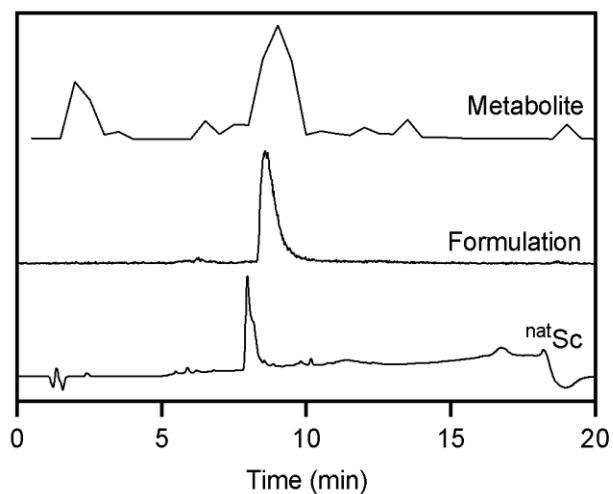

**Figure S30.** The RP-HPLC (Method B) analyses of  $[\text{natSc}][\text{Sc}(\text{L}^{111})]^+$ ,  $[\text{44Sc}][\text{Sc}(\text{L}^{111})]^+$  formulation, and urine metabolite.

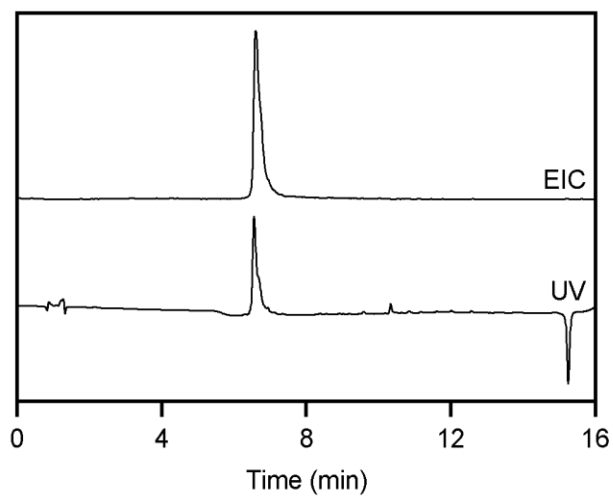

**Figure S31.** The UV (280 nm) and extracted ion ( $m/z = 525-527$ ) LCMS (Method G) chromatograms of  $[\text{Sc}(\text{L}^{111})]^+$ .

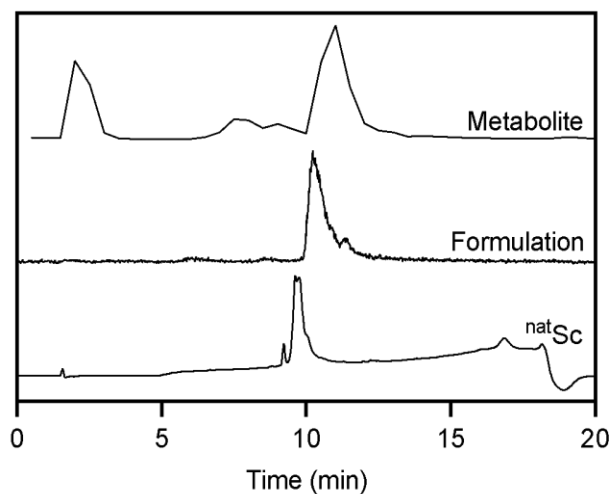

**Figure S32.** The RP-HPLC (Method B) analyses of  $[\text{natSc}][\text{Sc}(\text{L}^{021})]^{2+}$ ,  $[\text{Sc}^{44}][\text{Sc}(\text{L}^{021})]^{2+}$  formulation, and urine metabolite.

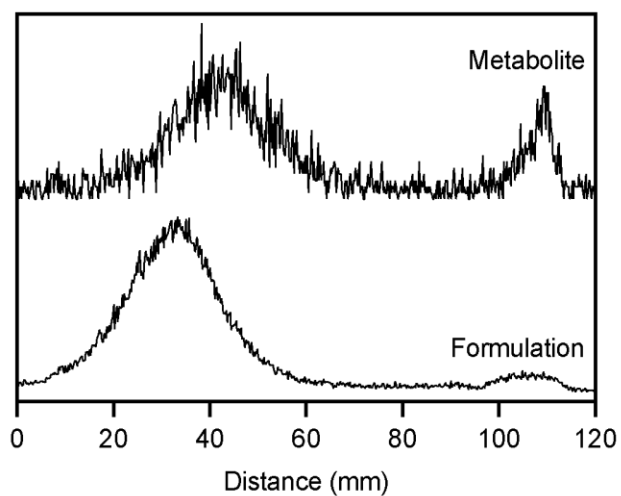

**Figure S33.** The iTLC (right) analyses of the  $[\text{Sc}^{44}][\text{Sc}(\text{L}^{300})]$  formulation and urine metabolite.

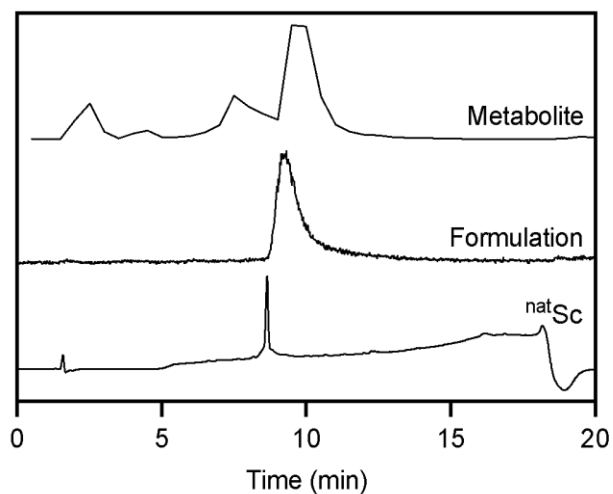

**Figure S34.** The RP-HPLC (Method B) analyses of  $[\text{natSc}][\text{Sc}(\text{L}^{210})]^+$ , the  $[\text{Sc}^{44}][\text{Sc}(\text{L}^{210})]^+$  formulation, and urine metabolite.

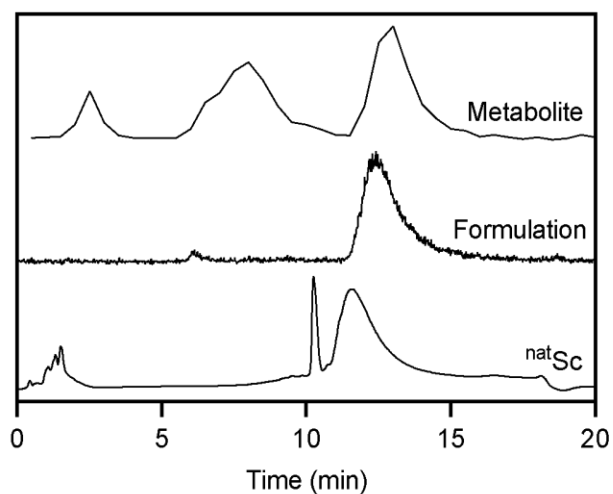

**Figure S35.** The RP-HPLC (Method B) analyses of  $[\text{natSc}][\text{Sc}(\text{L}^{120})]^{2+}$ , the  $[\text{Sc}^{44}][\text{Sc}(\text{L}^{120})]^{2+}$  formulation, and urine metabolite. Decomplexation of  $[\text{natSc}][\text{Sc}(\text{L}^{120})]^{2+}$  was observed when using HPLC mobile phases containing TFA.

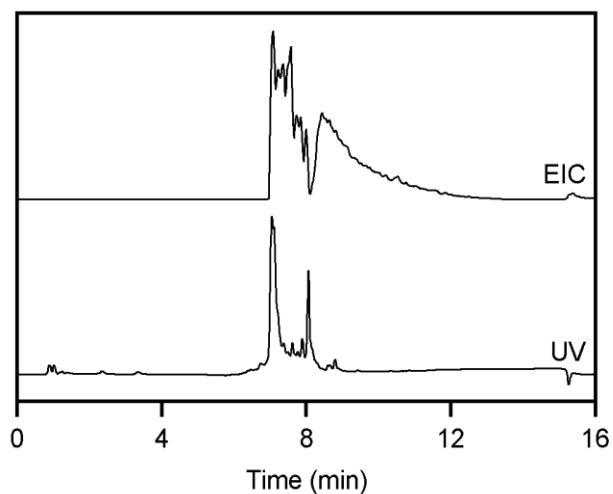

**Figure S36.** The UV (254 nm) and extracted ion ( $m/z = 597-599$ ) LCMS (Method G) chromatograms of  $[\text{natSc}][\text{Sc}(\text{L}^{120})]^{2+}$ .

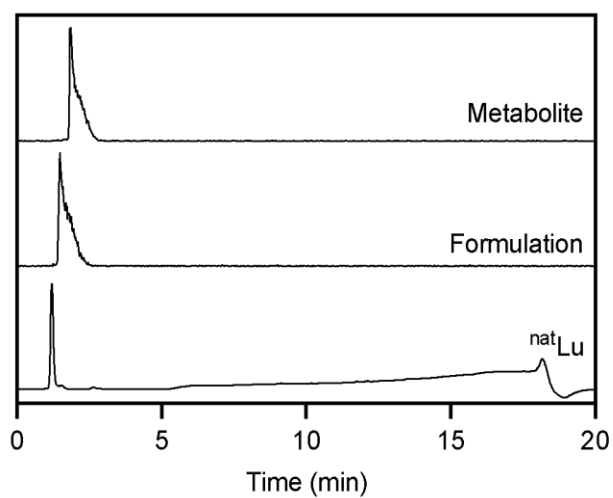

**Figure S37.** The RP-HPLC (Method A) analyses of  $[\text{natLu}]\text{Lu}(\text{L}^{201})$ ,  $[\text{177Lu}]\text{Lu}(\text{L}^{201})$  formulation, and urine metabolite.



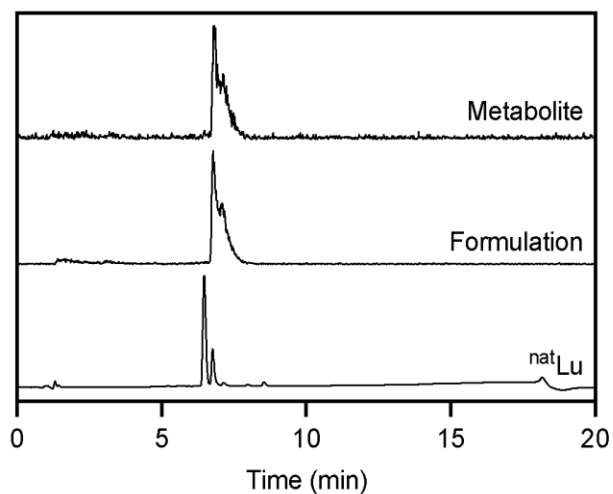

**Figure S38.** The RP-HPLC (Method A) analyses of  $[^{nat}\text{Lu}][\text{Lu}(\text{L}^{111})]^+$ ,  $[^{177}\text{Lu}][\text{Lu}(\text{L}^{111})]^+$  formulation, and urine metabolite.

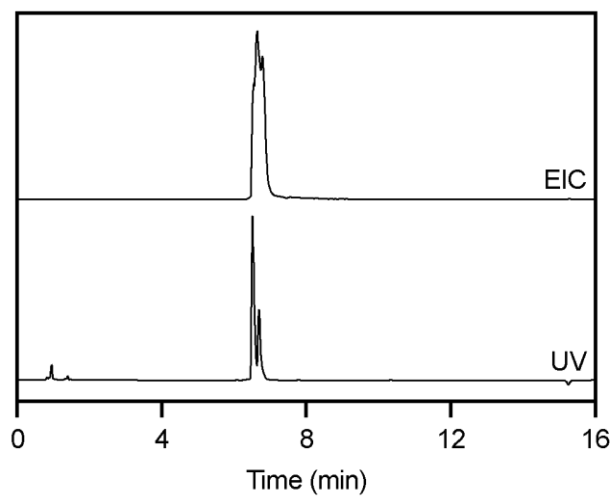

**Figure S39.** The UV (280 nm) and extracted ion ( $m/z = 655-657$ ) LCMS (Method G) chromatograms of  $[\text{Lu}(\text{L}^{111})]^+$ .

## 1.8 Speciation Studies

### 1.8.1 Speciation of $H_2L^{111}$

$L^{111}$  (130  $\mu$ L, 19.23 mM, 0.0025 mmol), KCl (0.1888 g, 2.5 mmol), and HCl (0.2600g, 1 M, 0.25 mmol) were combined and diluted to 25.0 mL total volume to create the initial stock  $L^{111}$  solution at approximately pH 2 (0.1 mM  $H_2L^{111}$ , 0.1 M KCl, 0.01M HCl). Aliquots of 1 mL of the stock solution were removed, and the pH was adjusted via addition of 0.1 M KOH. Solutions were allowed to fully equilibrate over 24 hours prior to analysis.  $^1H$  NMR spectra and pH measurements were recorded for each sample and speciation calculations were performed using the HypNMR2008 program. Speciation plots were generated 23  $^1H$  NMR from pH 2-12.

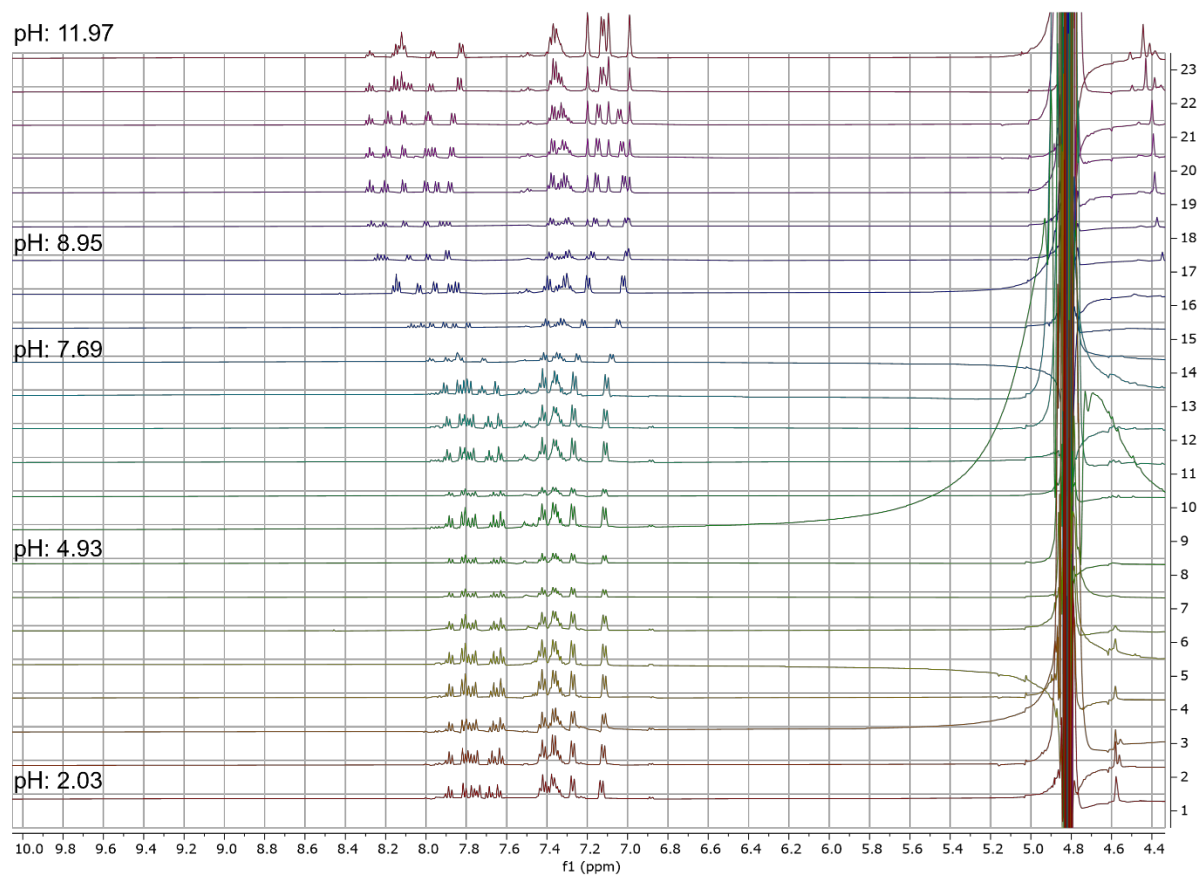

**Figure S40.** pH dependent  $^1H$  NMR spectra of  $H_2L^{111}$  that were used to calculate  $\log\beta$  values for  $L^{111}$ .

**Table S11.** Tabulated  $\log\beta$  values for  $\text{H}_2\text{L}^{111}$ .

| Species                    | $\log\beta$ |
|----------------------------|-------------|
| $\text{H L}^{111}$         | 12.97       |
| $\text{H}_2\text{L}^{111}$ | 18.23       |
| $\text{H}_3\text{L}^{111}$ | 22.49       |
| $\text{H}_4\text{L}^{111}$ | 25.43       |

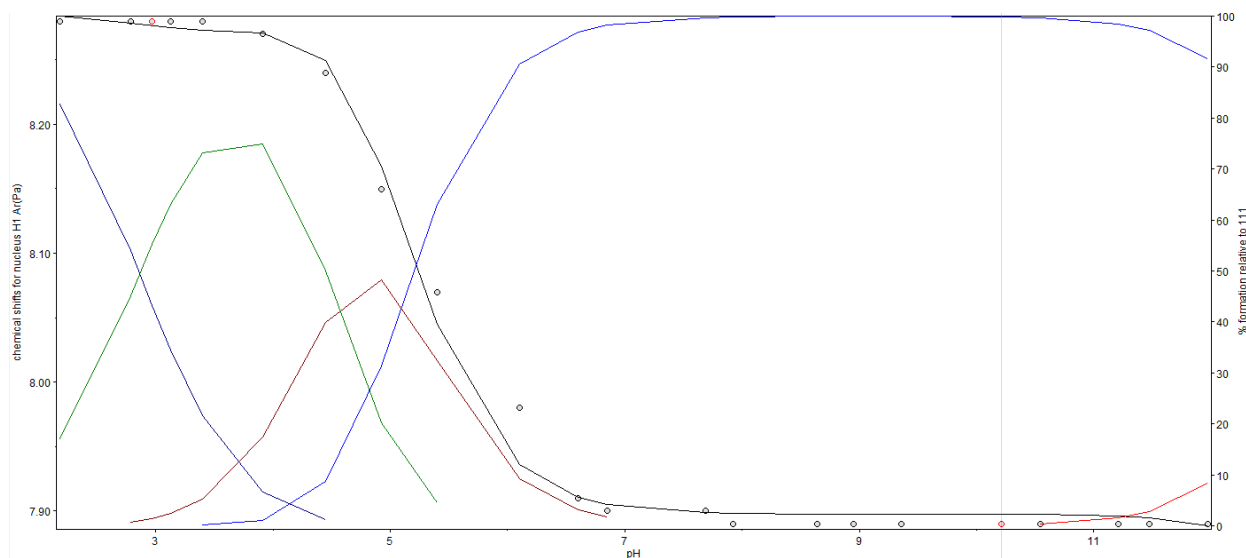

**Figure S41.** Representative data fit of  $^1\text{H}$  NMR spectra of  $\text{H}_2\text{L}^{111}$  in HYPNMR2008

### 1.8.2 Speciation of $[\text{Sc}(\text{L}^{111})]^+$ and $[\text{Lu}(\text{L}^{111})]^+$

$\text{ScCl}_3 \cdot 6\text{H}_2\text{O}$  (54.3  $\mu\text{L}$ , 4.6 mM, 0.00025 mmol),  $\text{H}_2\text{L}^{111}$  (35.7  $\mu\text{L}$ , 7.0 mM, 0.00025 mmol), KCl (0.1830 g, 2.5 mmol), and HCl (0.2549 g, 1 M, 0.25 mmol) were combined and diluted to 25.0 mL total volume to create the initial stock  $[\text{Sc}(\text{L}^{111})]^+$  solution at approximately pH 2 (0.01 mM  $\text{H}_2\text{L}^{111}$ , 0.01 mM  $\text{Sc}^{3+}$ , 0.1 M KCl, 0.01M HCl).  $\text{LuCl}_3 \cdot 6\text{H}_2\text{O}$  (33  $\mu\text{L}$ , 7.5 mM, 0.00025 mmol),  $\text{H}_2\text{L}^{111}$  (33  $\mu\text{L}$ , 7.6 mM, 0.00025 mmol), KCl (0.1850 g, 2.5 mmol), and HCl (0.2568 g, 1 M, 0.25 mmol) were combined and diluted to 25.0 mL total volume to create the initial  $[\text{Lu}(\text{L}^{111})]^+$  stock solution at approximately pH 2 (0.01 mM  $\text{H}_2\text{L}^{111}$ , 0.01 mM  $\text{Lu}^{3+}$ , 0.1 M KCl, 0.01M HCl). Aliquots of 1 mL of the stock solution were removed, and the pH was adjusted via addition of 0.1 M KOH. Solutions were allowed to fully equilibrate over 48 hours prior to analysis. UV-visible spectra and pH measurements were recorded for each sample, and speciation calculations were performed using the HypSpec2014 program. The appearance of a peak at 280 nm in the  $[\text{Sc}(\text{L}^{111})]^+$  speciation was taken as the binding of  $\text{Sc}^{3+}$  to  $\text{H}_2\text{L}^{111}$ , and an increase at 207 nm as the formation of the hydroxide species. The appearance of a peak at 280 nm in the  $[\text{Lu}(\text{L}^{111})]^+$  speciation was taken as the binding of  $\text{Lu}^{3+}$  to  $\text{H}_2\text{L}^{111}$ , and an increase at 207 nm as the formation of the hydroxide species. For both systems, speciation plots were generated using 23 UV-vis spectra from pH 1.5-12.

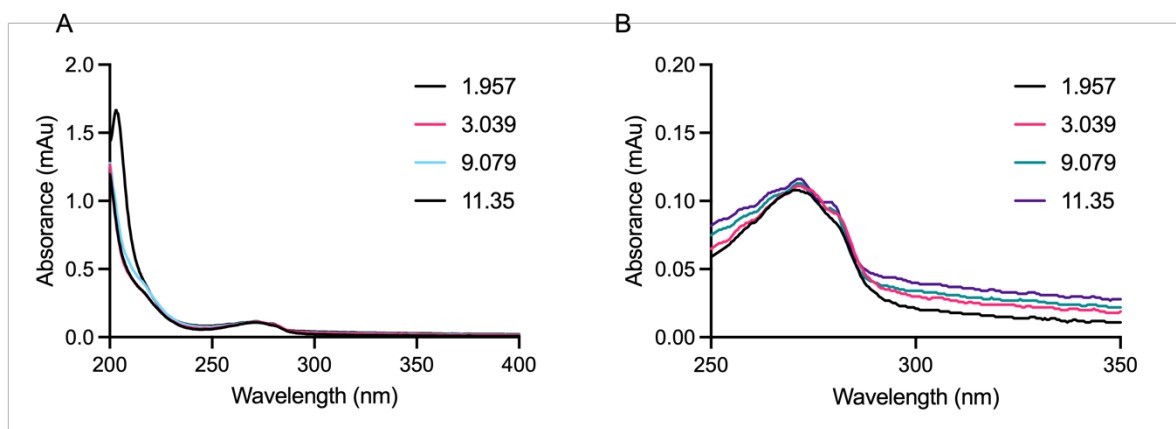

**Figure S42.** a) Select pH dependent UV-vis spectra of  $[\text{Sc}(\text{L}^{111})]^+$  that were used to calculate  $\log\beta$  values for  $[\text{Sc}(\text{L}^{111})]^+$ . b) Enhanced region to show subtle differences in UV-vis absorbance.

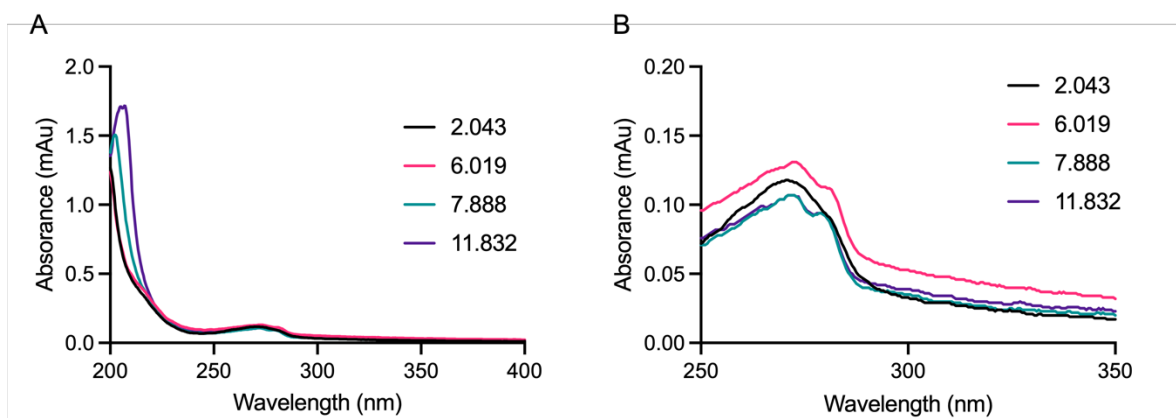

**Figure S43.** a) Select pH dependent UV-vis spectra of  $[\text{Lu}(\text{L}^{111})]^+$  that were used to calculate  $\log\beta$  values for  $[\text{Lu}(\text{L}^{111})]^+$ . b) Enhanced region to show subtle differences in UV-vis absorbance.

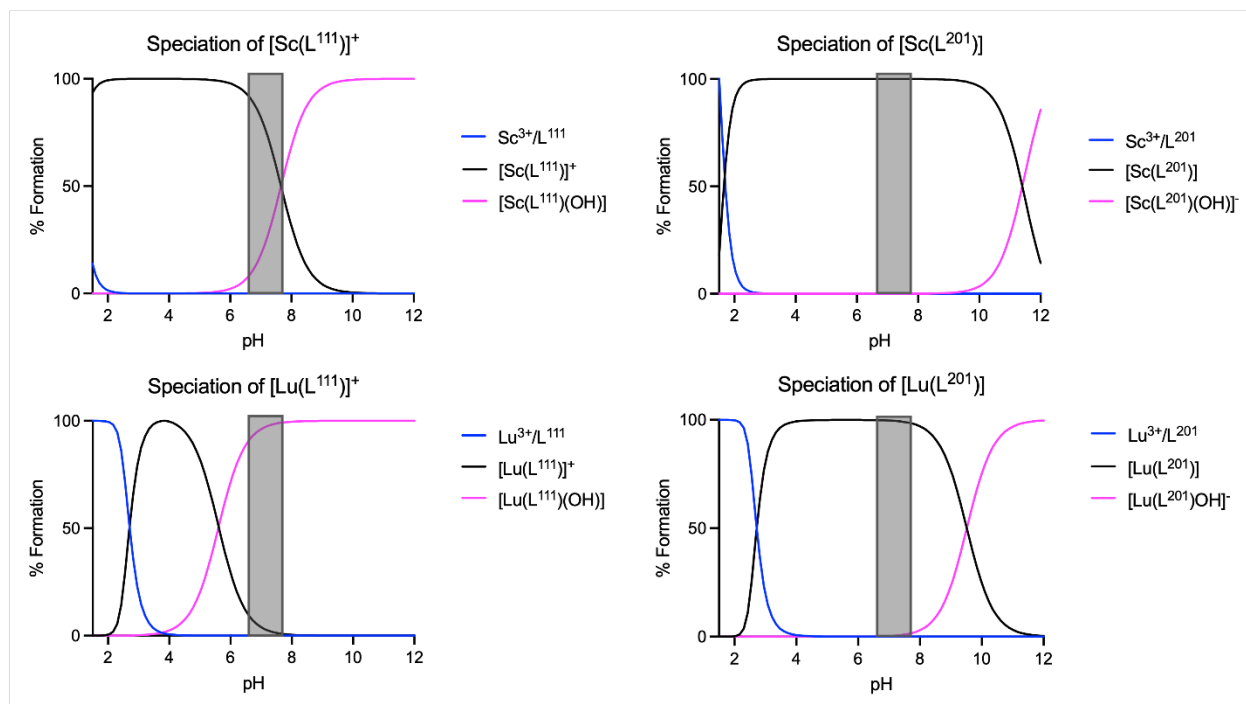

**Figure S44.** Speciation plots of  $[M(L^{111})]^+$  and  $[M(L^{201})]$  ( $M = Sc^{3+}, Lu^{3+}$ ). The grey box denotes physiologically relevant pH (7.4).

**Table S12.** Thermodynamic and spectroscopic parameters for  $[Sc(L)]$  and  $[Lu(L)]$  ( $ML/_{110}$  and  $MLOH/_{111}$  species). Values for  $L^{201}$  come from previous work.

| Parameter                          | $M = Sc^{3+} L^{xxx} = L^{111}$ | $M = Lu^{3+} L^{xxx} = L^{111}$ | $M = Sc^{3+} L^{xxx} = L^{201}$ | $M = Lu^{3+} L^{xxx} = L^{201}$ |
|------------------------------------|---------------------------------|---------------------------------|---------------------------------|---------------------------------|
| $\log \beta_{110} / \log K_{ML}$   | 26.8                            | 20.1                            | 21.3                            | 17.5                            |
| $\log \beta_{111} / \log K_{MLOH}$ | 19.1                            | 14.5                            | 9.8                             | 8                               |
| pM                                 | 23.4                            | 18.3                            | 17.8                            | 16.5                            |
| $pK_{aML}$                         | 0.74                            | 2.6                             | 1.6                             | 2.5                             |
| $pK_{aMLOH}$                       | 7.7                             | 5.6                             | 11.5                            | 9.5                             |

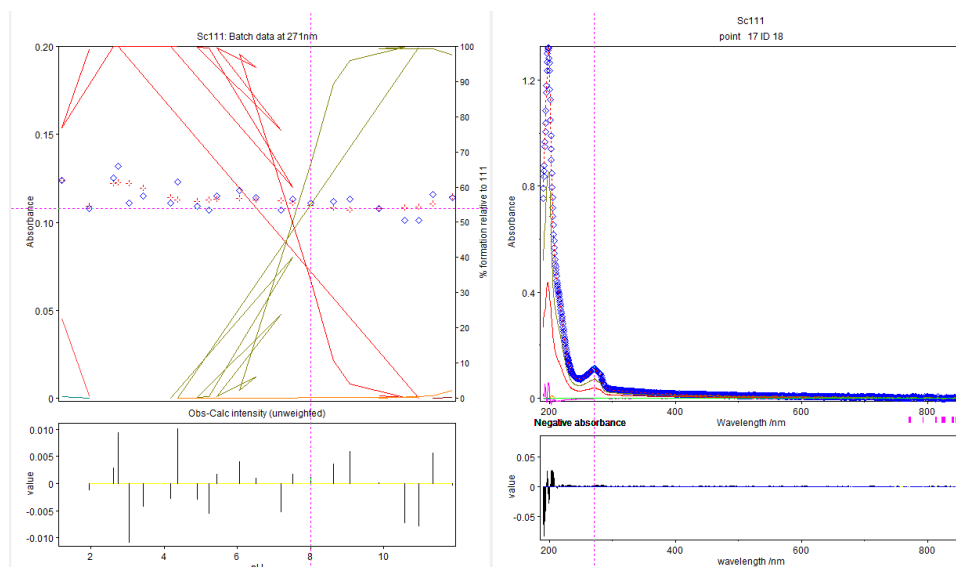

**Figure S45.** Representative data fit of UV-Vis spectra of  $[\text{Sc}(\text{L}^{111})]^+$  in HYPSPIC2014

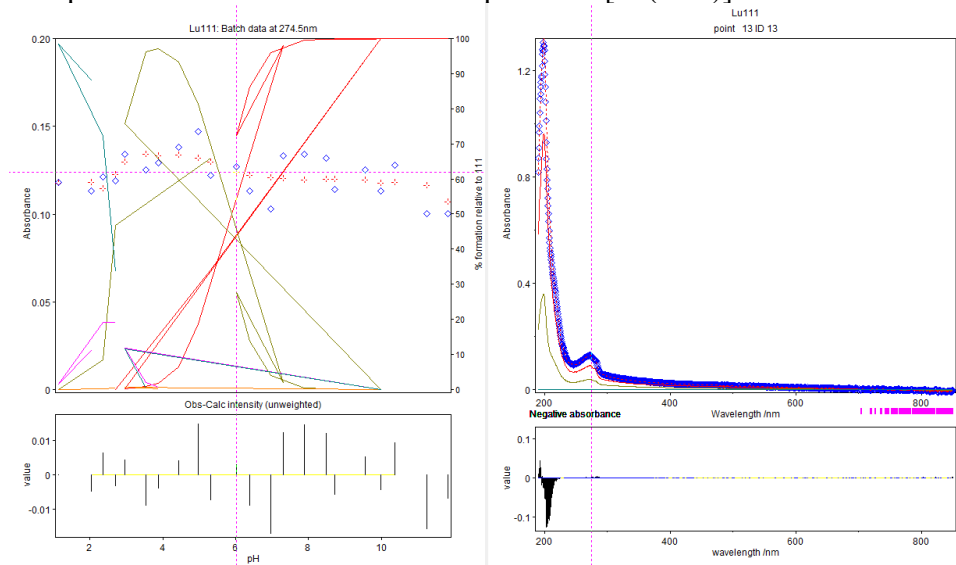

**Figure S46.** Representative data fit of UV-Vis spectra of  $[\text{Lu}(\text{L}^{111})]^+$  in HYPSPIC2014

## 2 Ligand and Complex Characterization Data

### 2.1 NMR Characterization

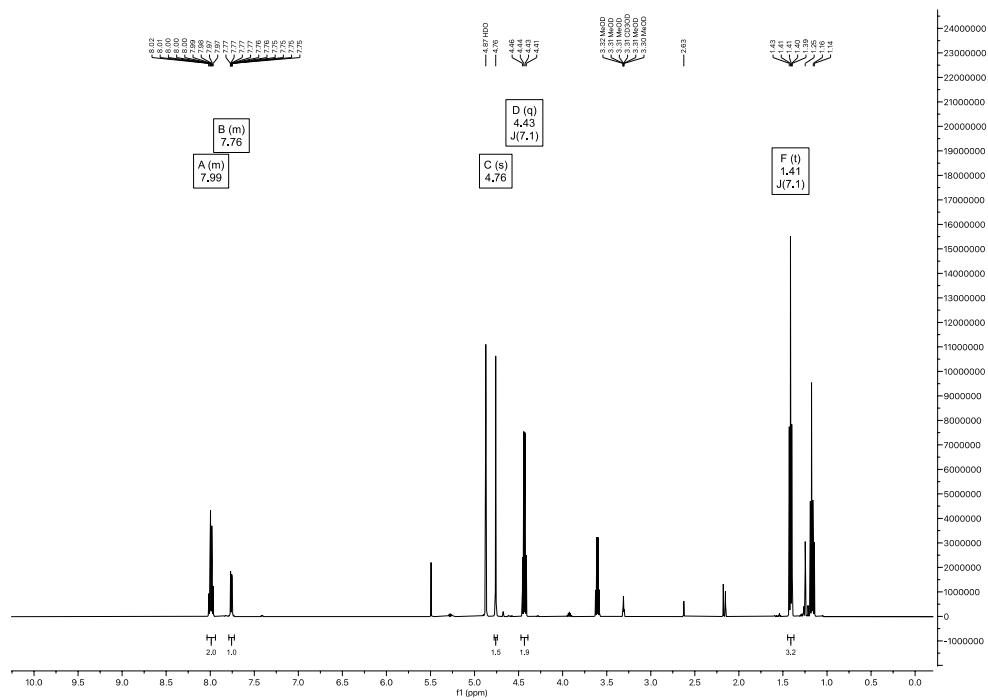

Figure S47 The <sup>1</sup>H NMR spectrum of ethyl 6-(hydroxymethyl)picolinate in MeOD.

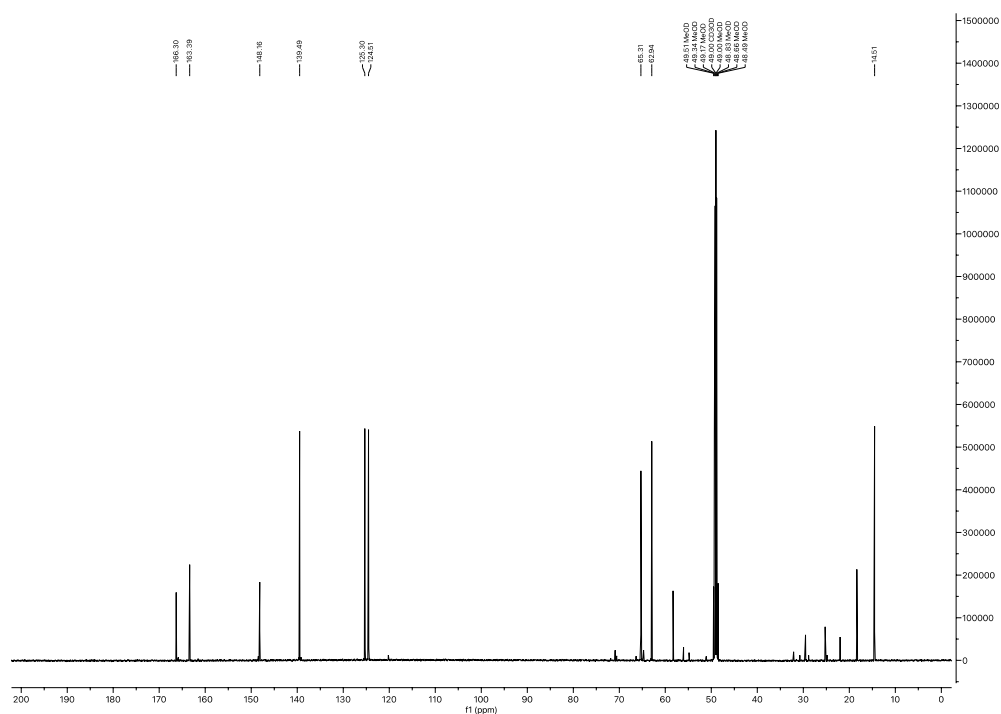

Figure S48 The <sup>13</sup>C {<sup>1</sup>H} NMR spectrum of ethyl 6-(hydroxymethyl)picolinate in MeOD.

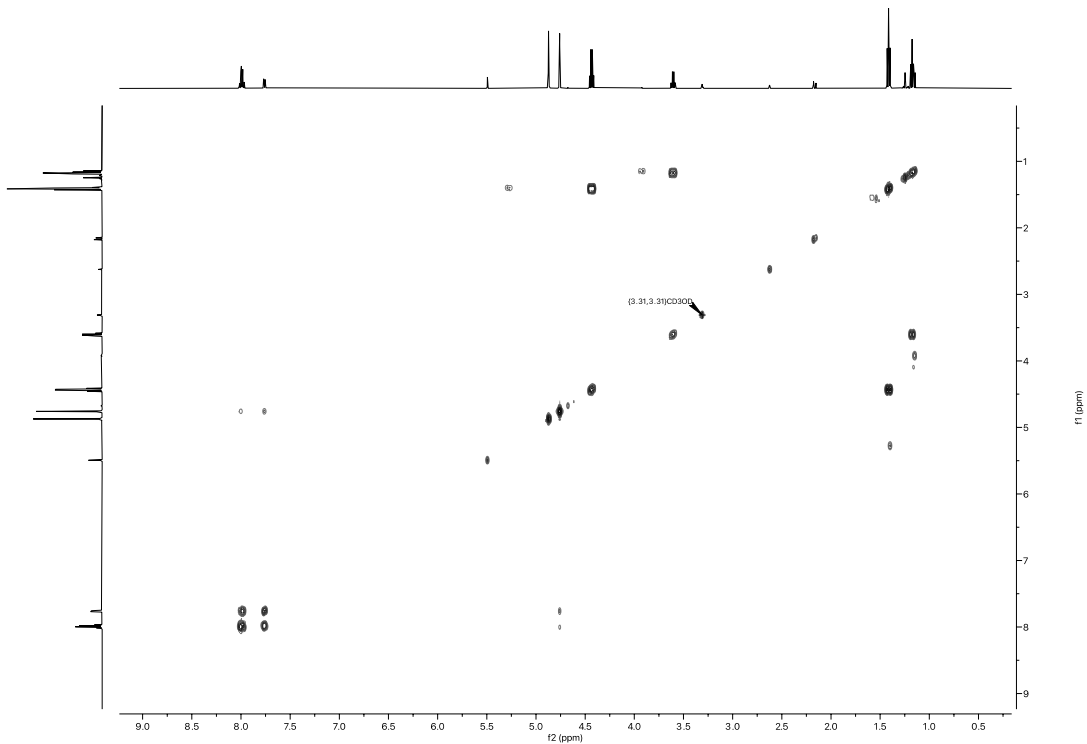

**Figure S49** The <sup>1</sup>H-<sup>1</sup>H COSY NMR spectrum of ethyl 6-(hydroxymethyl)picolinate in MeOD.

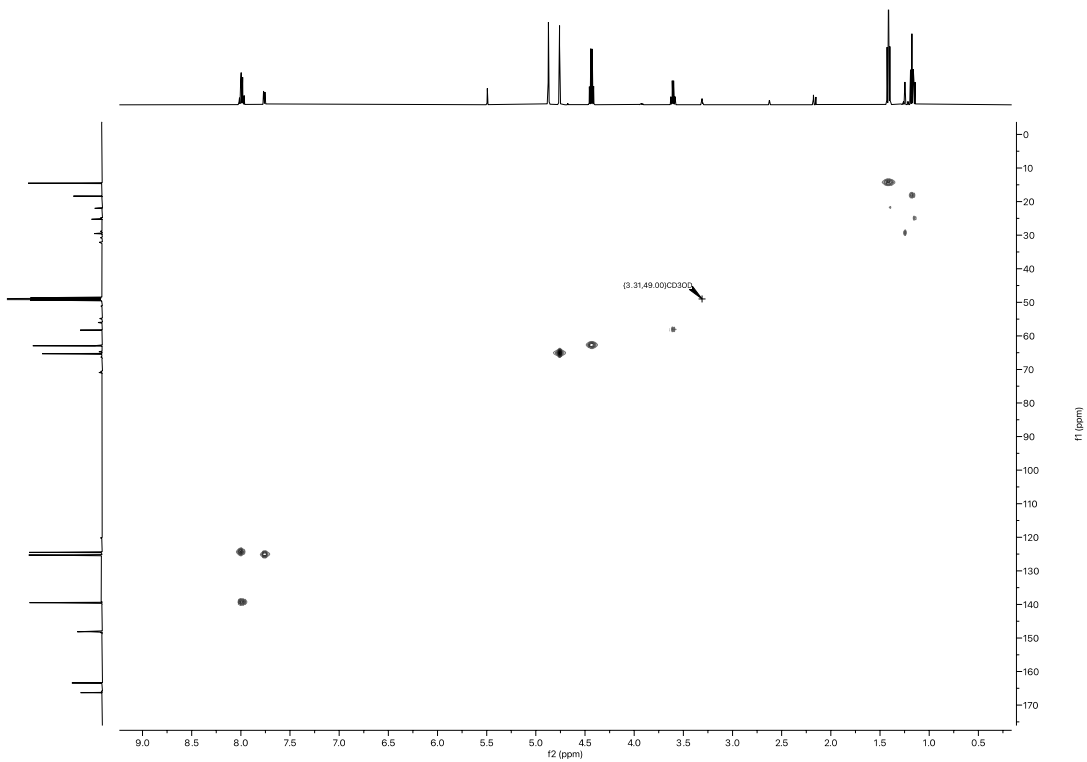

**Figure S50** The <sup>1</sup>H-<sup>13</sup>C HSQC NMR spectrum of ethyl 6-(hydroxymethyl)picolinate in MeOD.



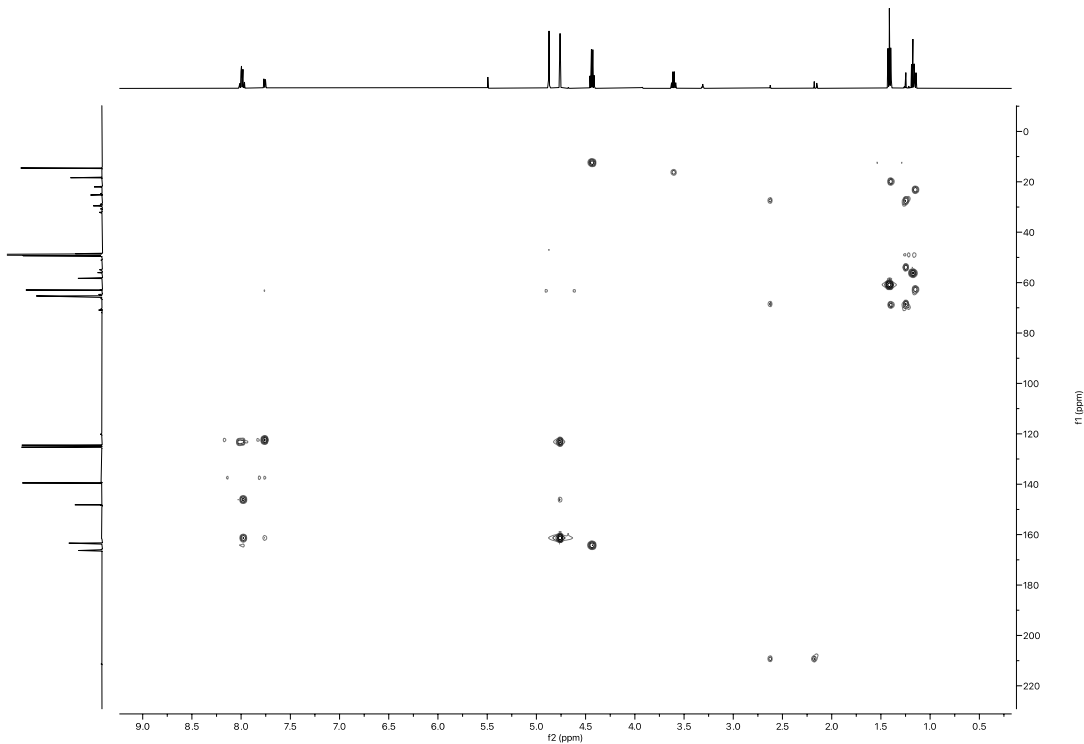

Figure S51 The  $^1\text{H}$ - $^{13}\text{C}$  HMBC NMR spectrum of ethyl 6-(hydroxymethyl)picolinate in MeOD.

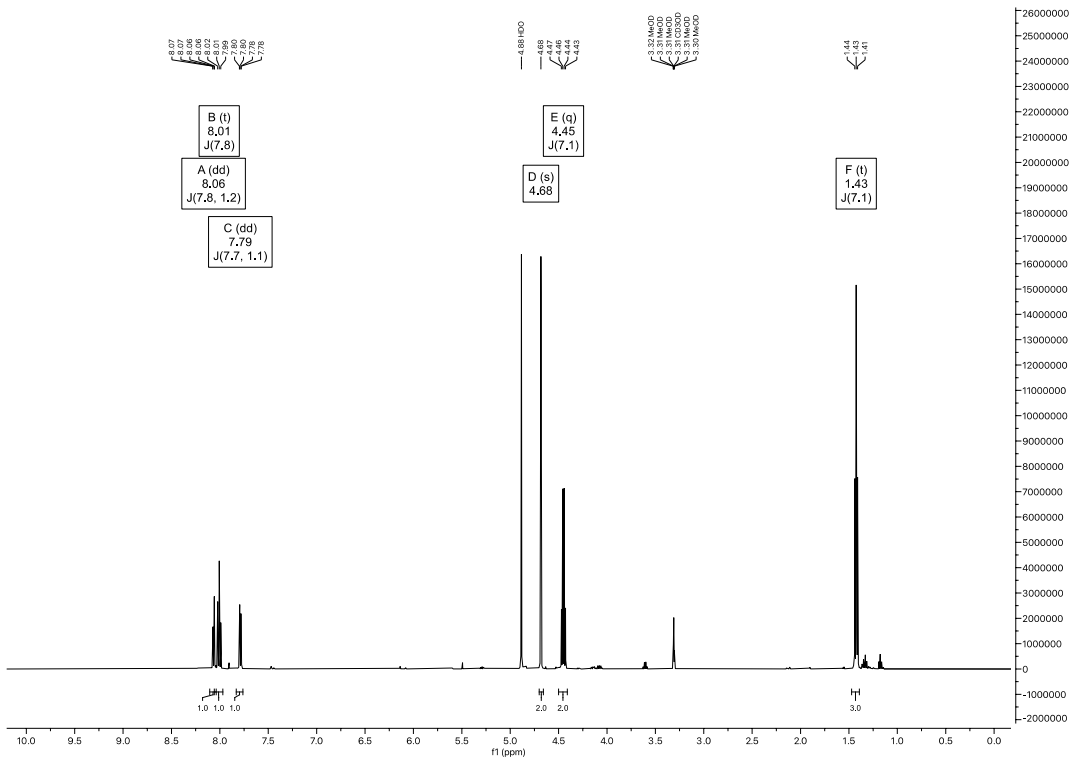

Figure S52 The  $^1\text{H}$  NMR spectrum of ethyl 6-(bromomethyl)picolinate in MeOD.

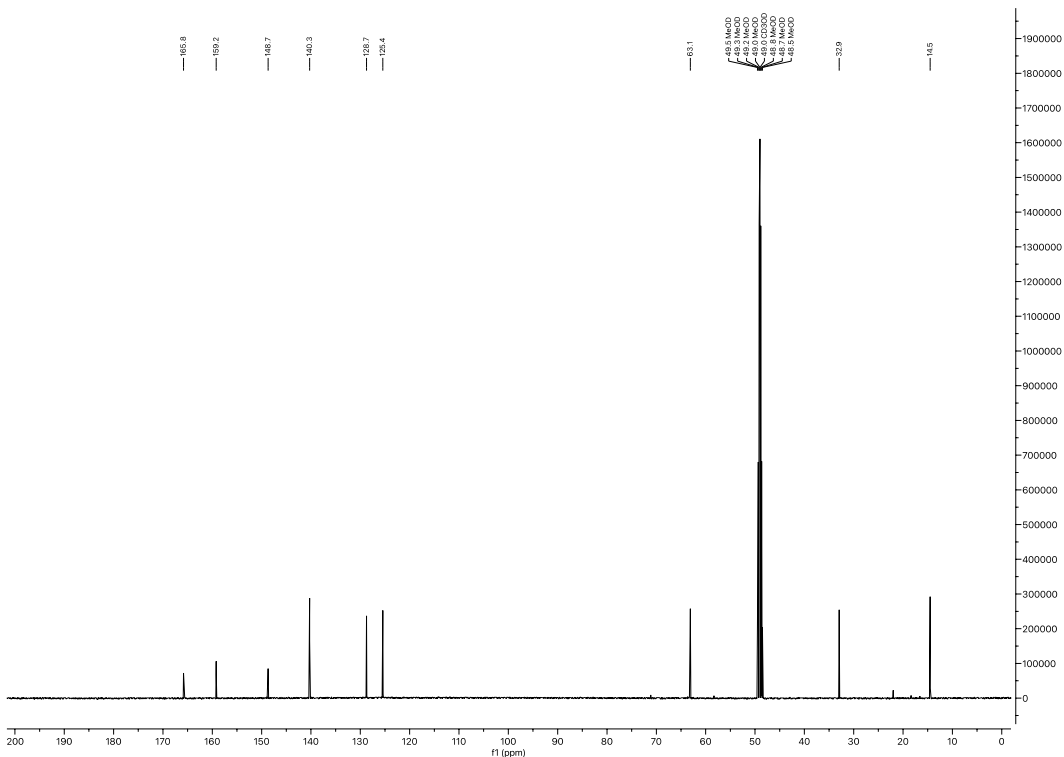

**Figure S53** The  $^{13}\text{C}\{^1\text{H}\}$  NMR spectrum of ethyl 6-(bromomethyl)picolinate in MeOD.

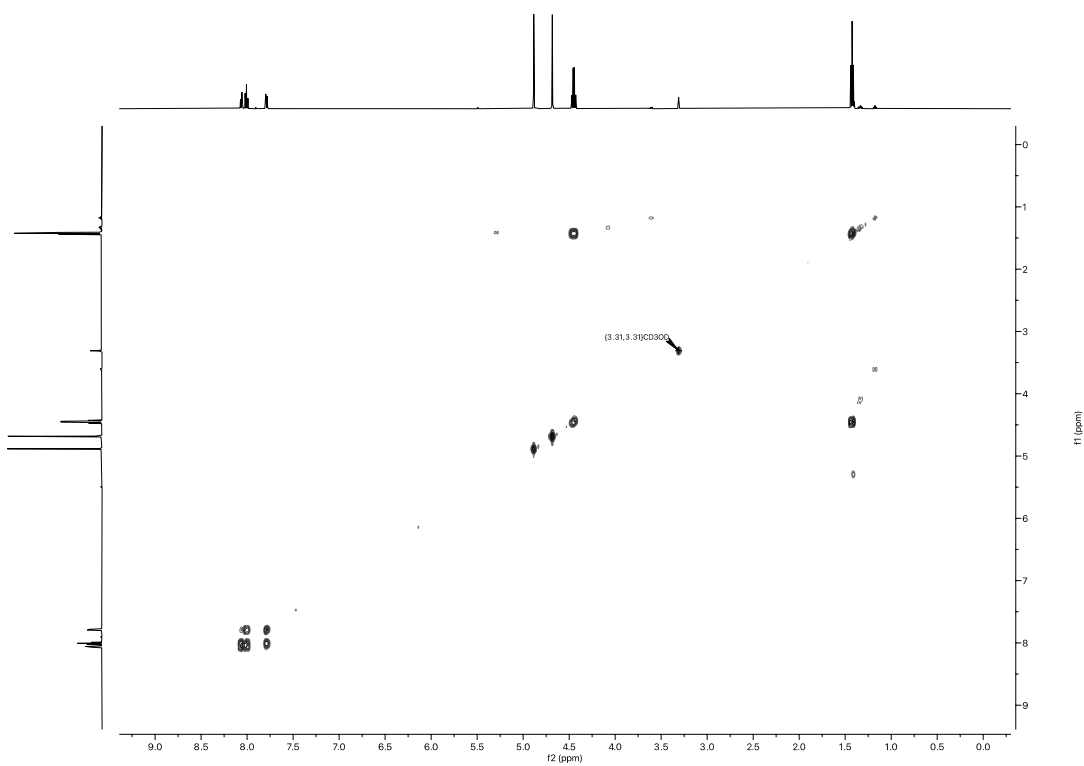

**Figure S54** The  $^1\text{H}\text{-}^1\text{H}$  COSY NMR spectrum of ethyl 6-(bromomethyl)picolinate in MeOD.

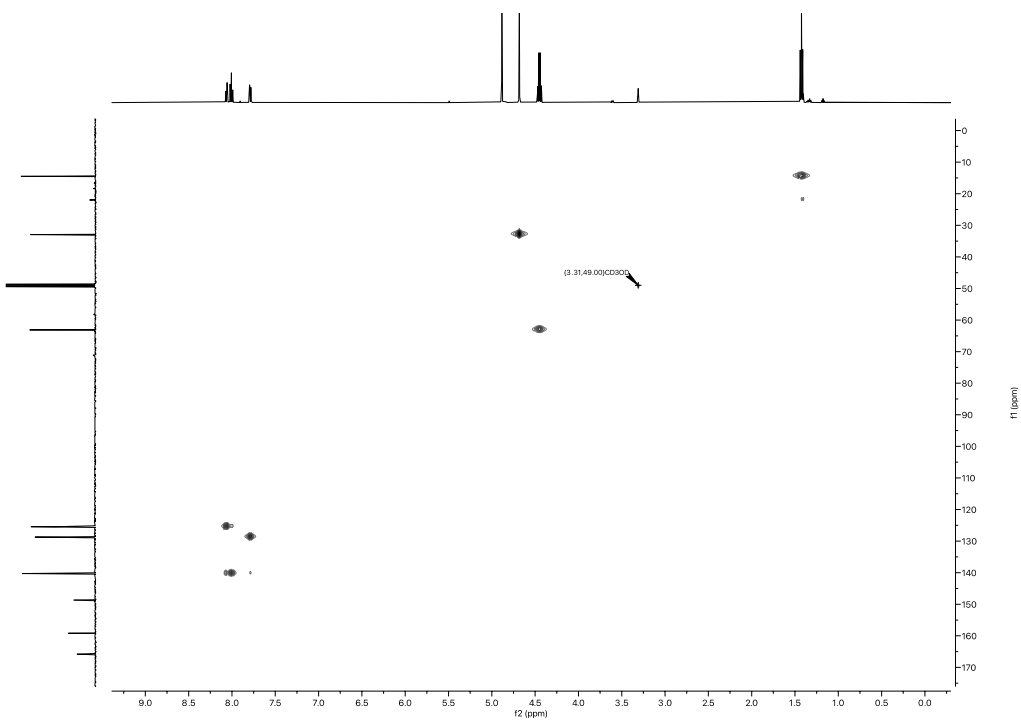

**Figure S55** The  $^1\text{H}$ - $^{13}\text{C}$  HSQC NMR spectrum of ethyl 6-(bromomethyl)picolinate in MeOD.

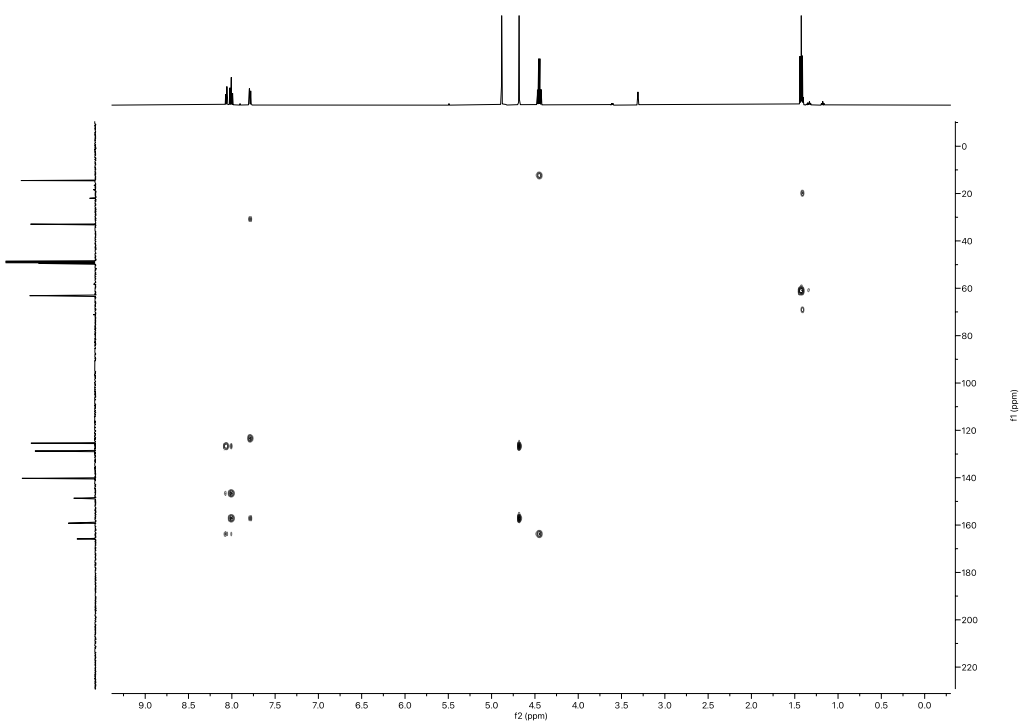

**Figure S56** The  $^1\text{H}$ - $^{13}\text{C}$  HMBC NMR spectrum of ethyl 6-(bromomethyl)picolinate in MeOD.

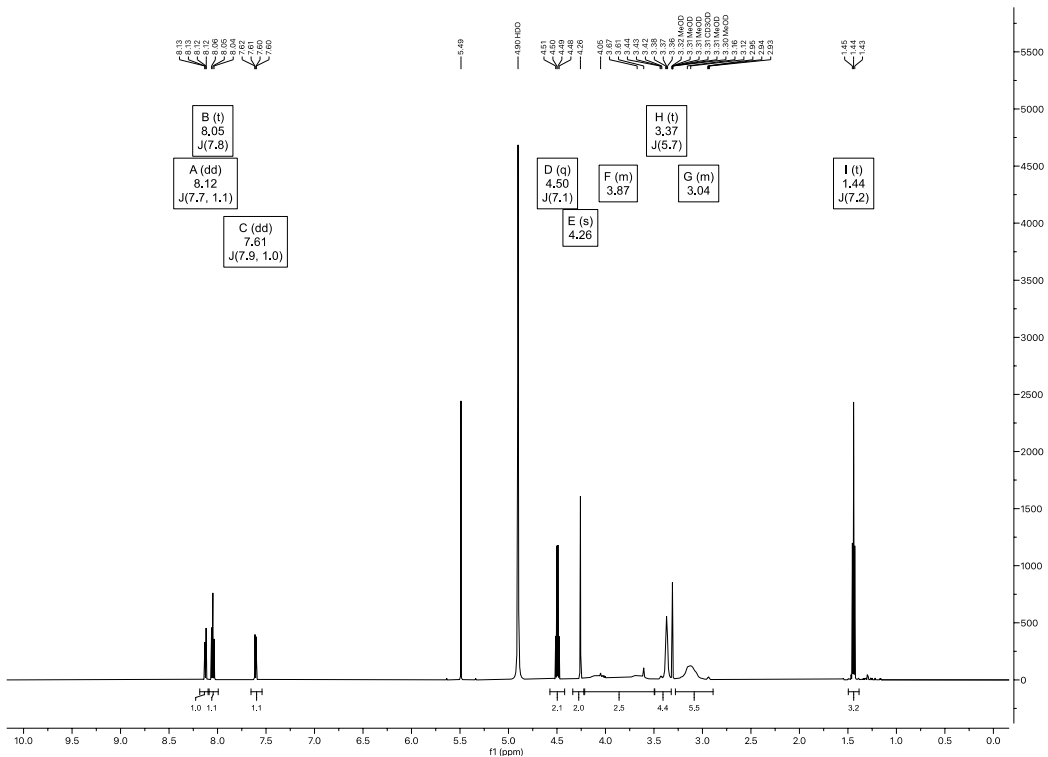

Figure S57 The  $^1\text{H}$  NMR spectrum of monoPic in MeOD.

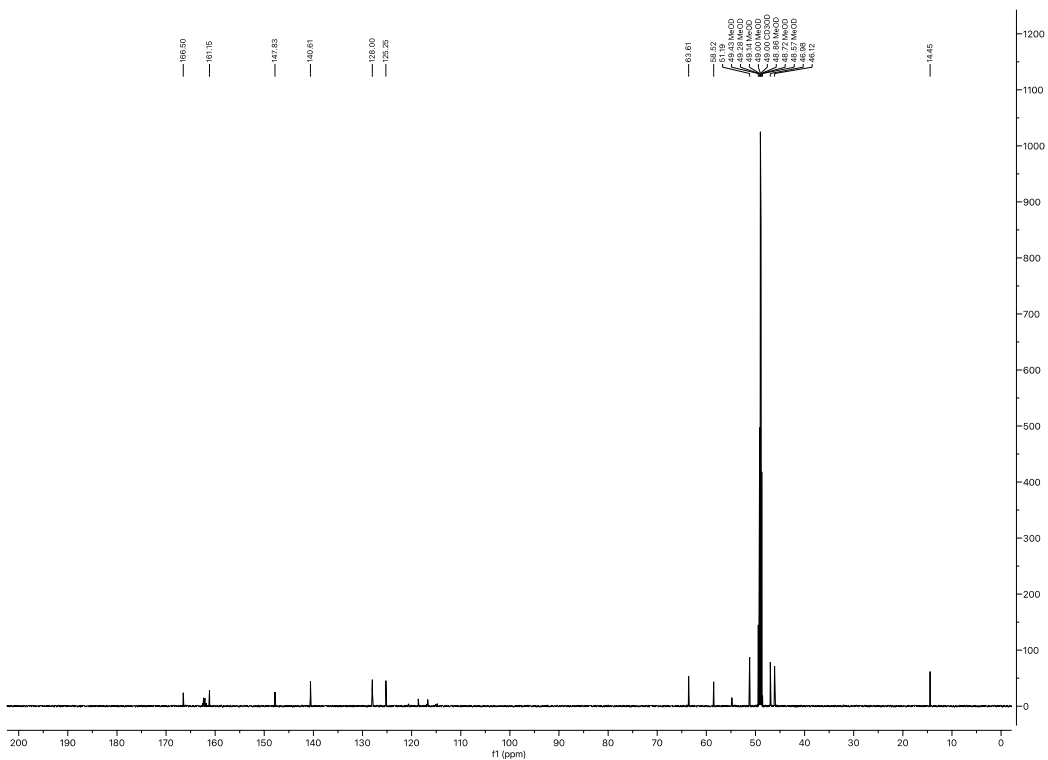

Figure S58 The  $^{13}\text{C}\{^1\text{H}\}$  NMR spectrum of monoPic in MeOD.

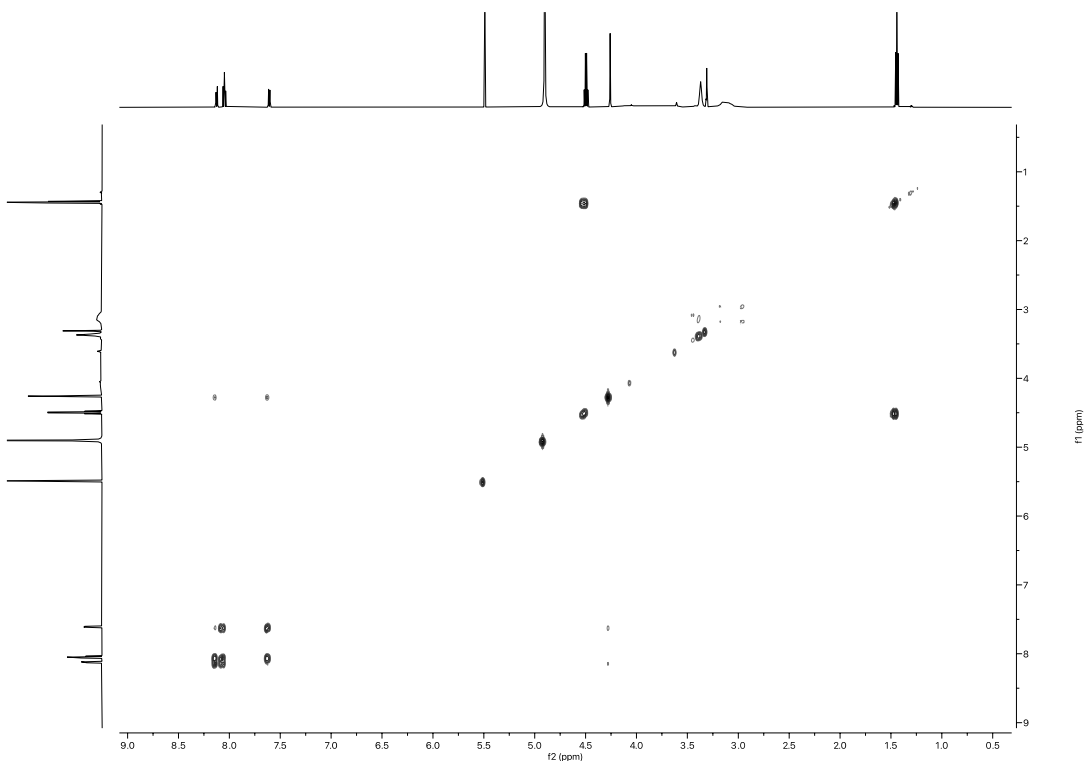

**Figure S59** The  $^1\text{H}$ - $^1\text{H}$  COSY NMR spectrum of monoPic in MeOD.

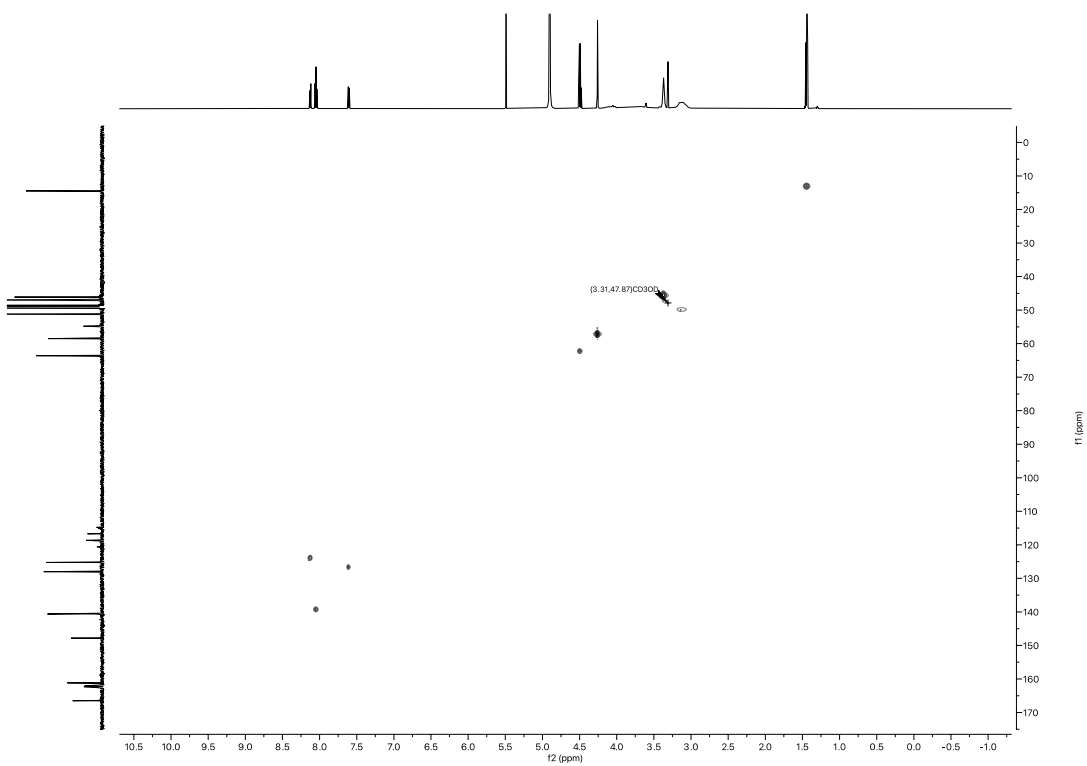

**Figure S60** The  $^1\text{H}$ - $^{13}\text{C}$  HSQC NMR spectrum of monoPic in MeOD.

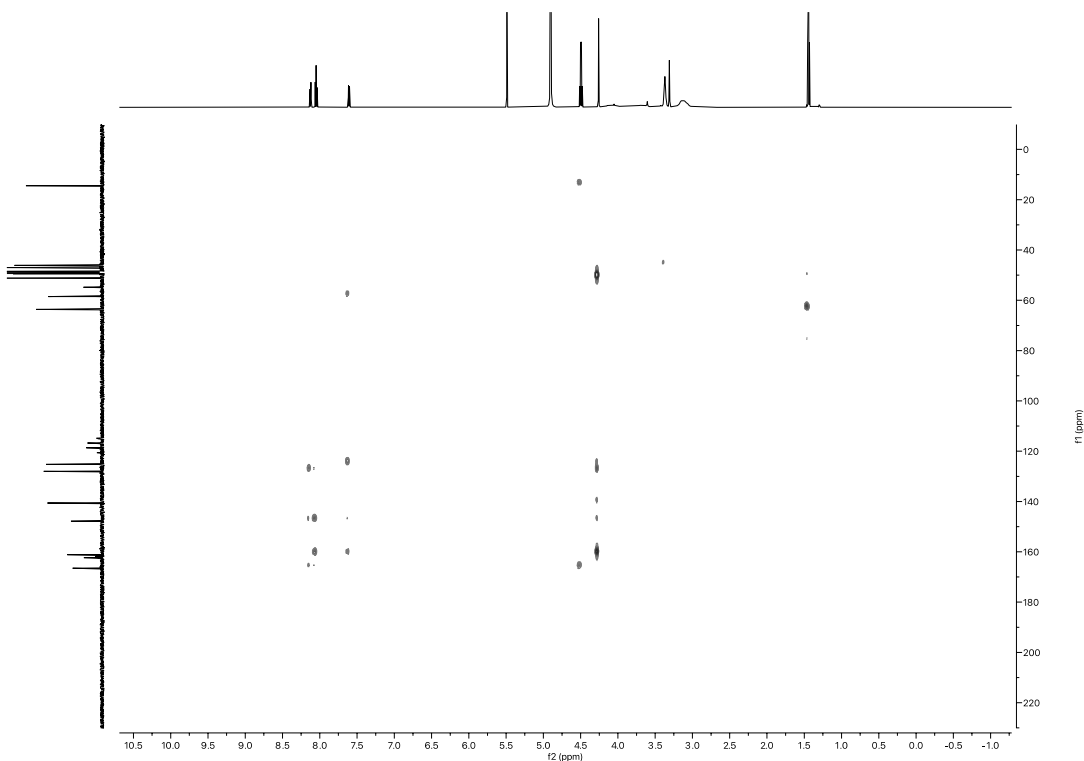

Figure S61 The  $^1\text{H}$ - $^{13}\text{C}$  HMBC NMR spectrum of monoPic in MeOD.

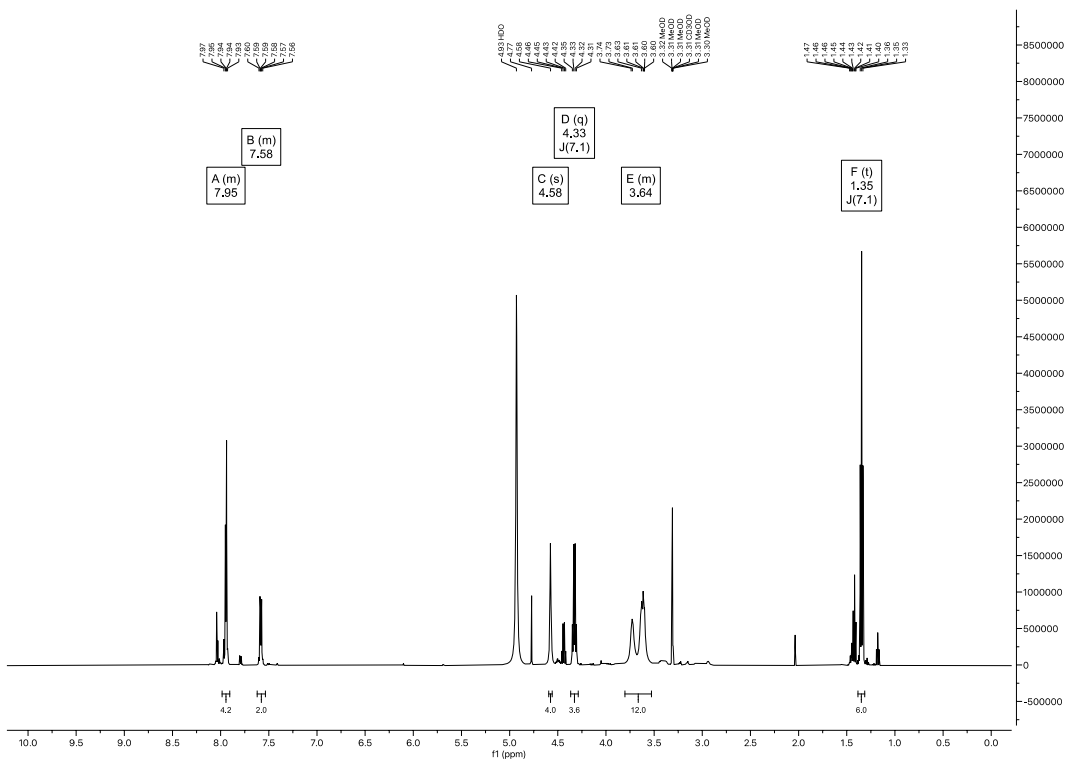

Figure S62 The  $^1\text{H}$  NMR spectrum of diPic in MeOD.

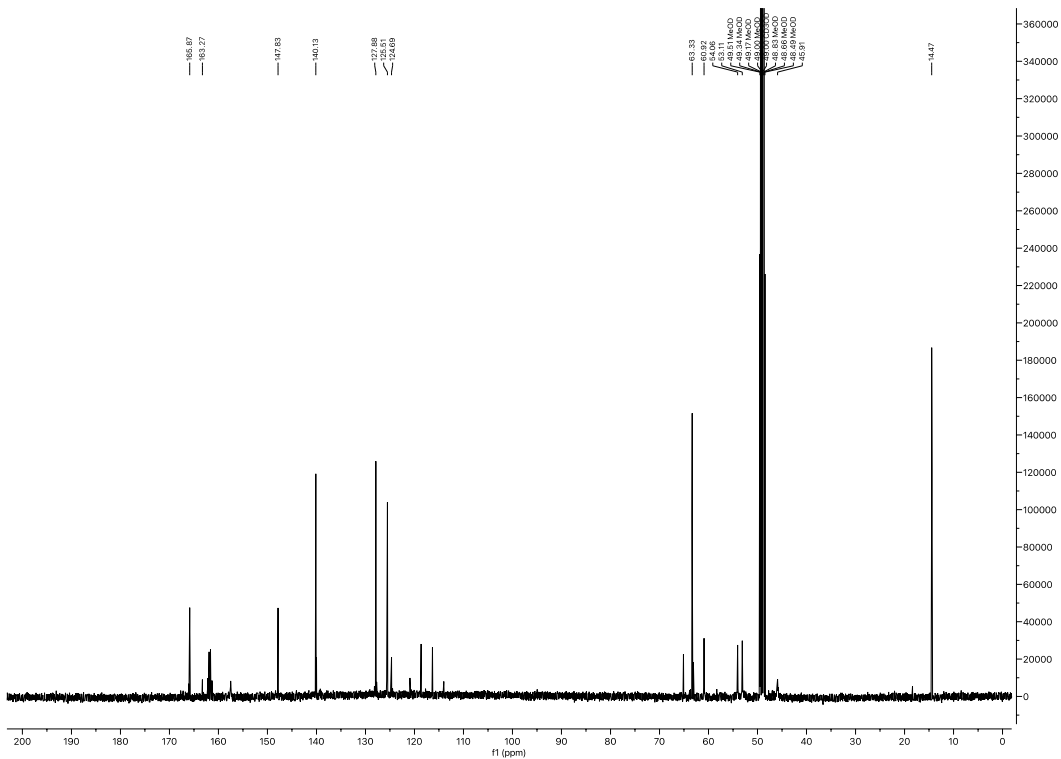

Figure S63 The  $^{13}\text{C}\{^1\text{H}\}$  NMR spectrum of diPic in MeOD.

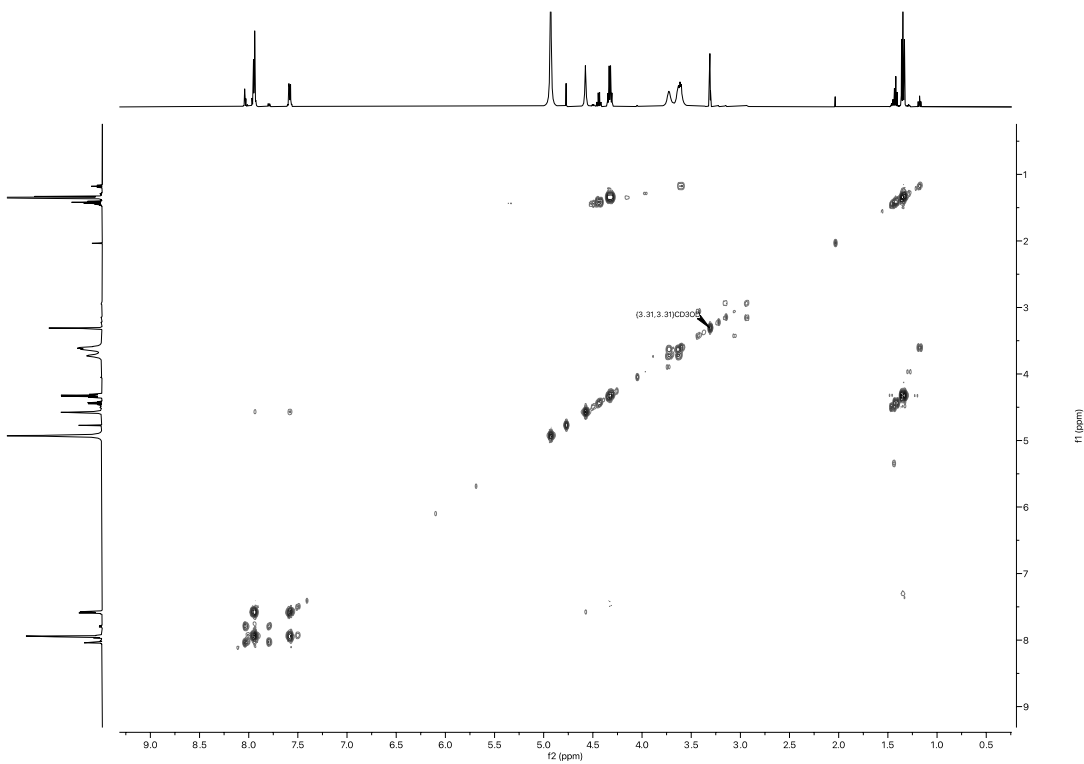

Figure S64 The  $^1\text{H}\text{-}^1\text{H}$  COSY NMR spectrum of diPic in MeOD.

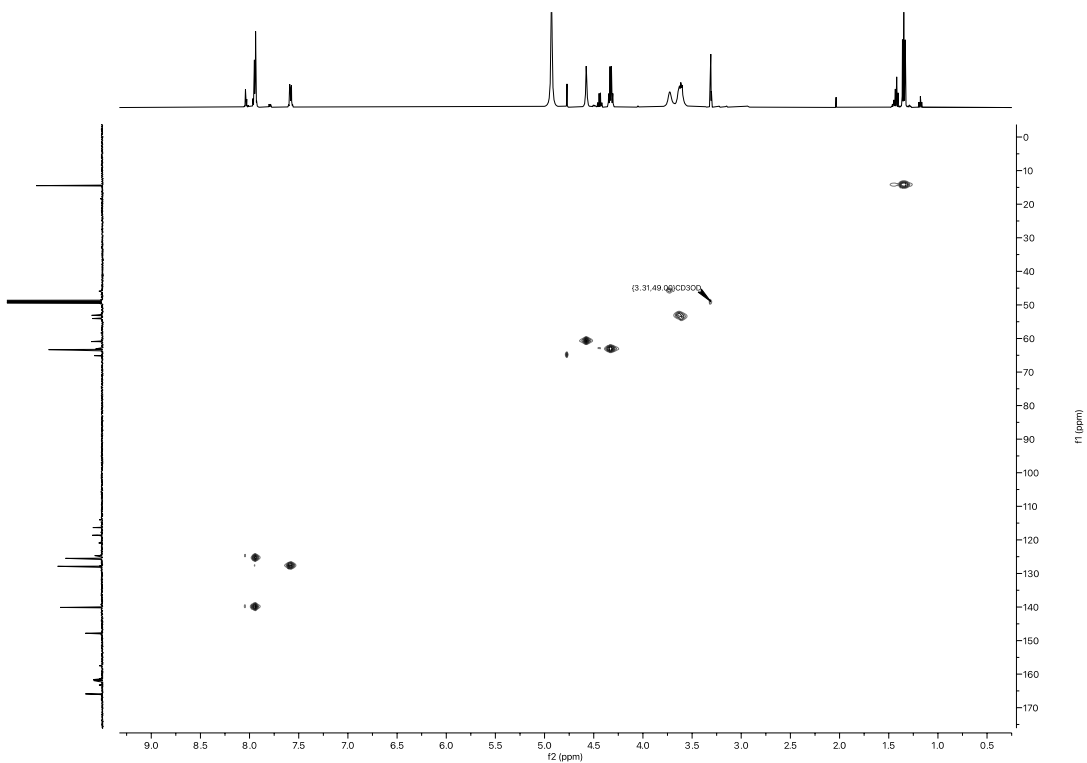

**Figure S65** The  $^1\text{H}$ - $^{13}\text{C}$  HSQC NMR spectrum of diPic in MeOD.

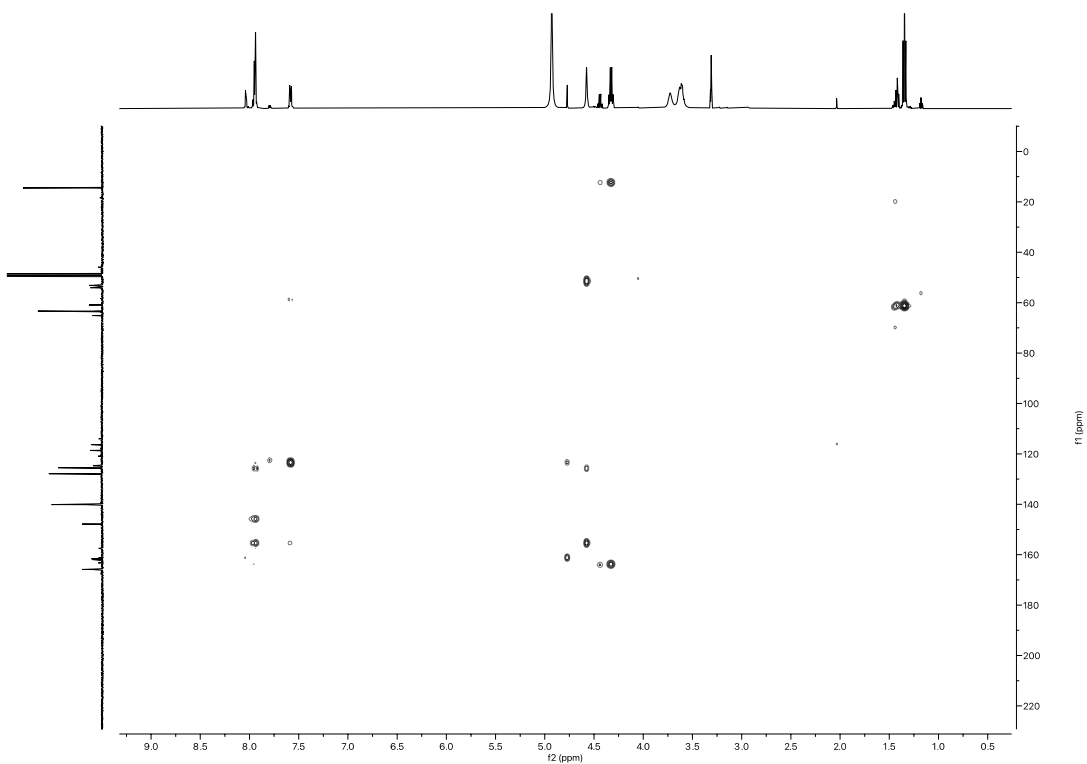

**Figure S66** The  $^1\text{H}$ - $^{13}\text{C}$  HMBC NMR spectrum of diPic in MeOD.



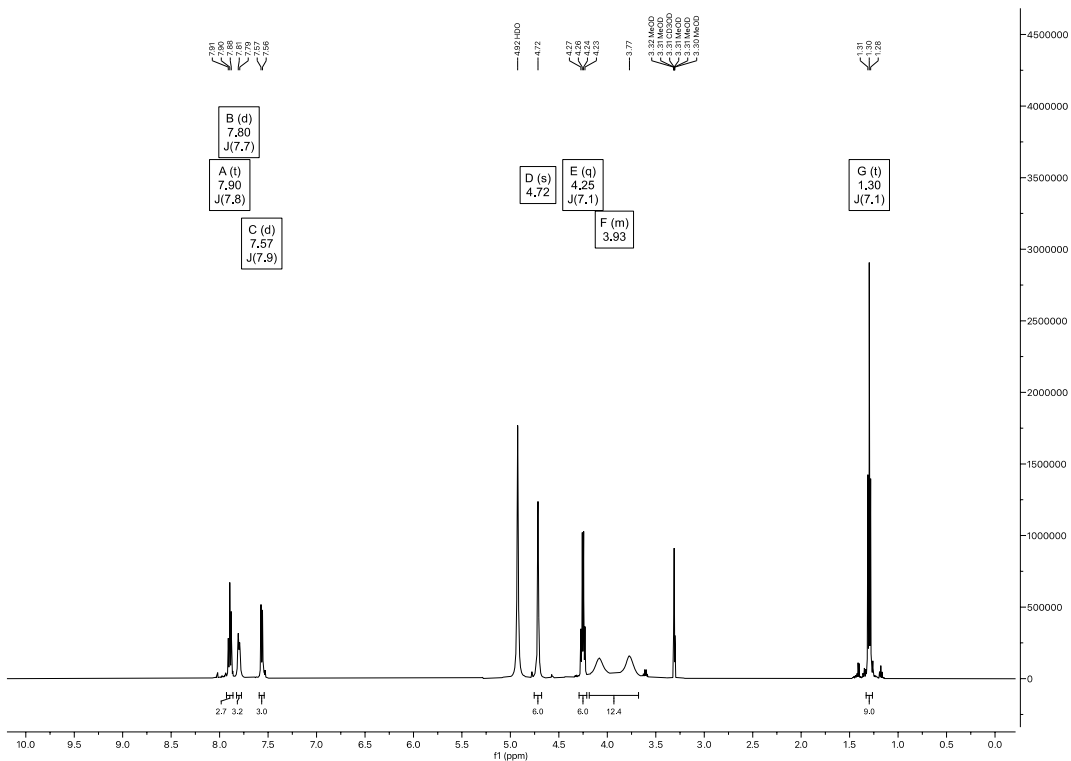

Figure S67 The  $^1\text{H}$  NMR spectrum of triPic in MeOD.

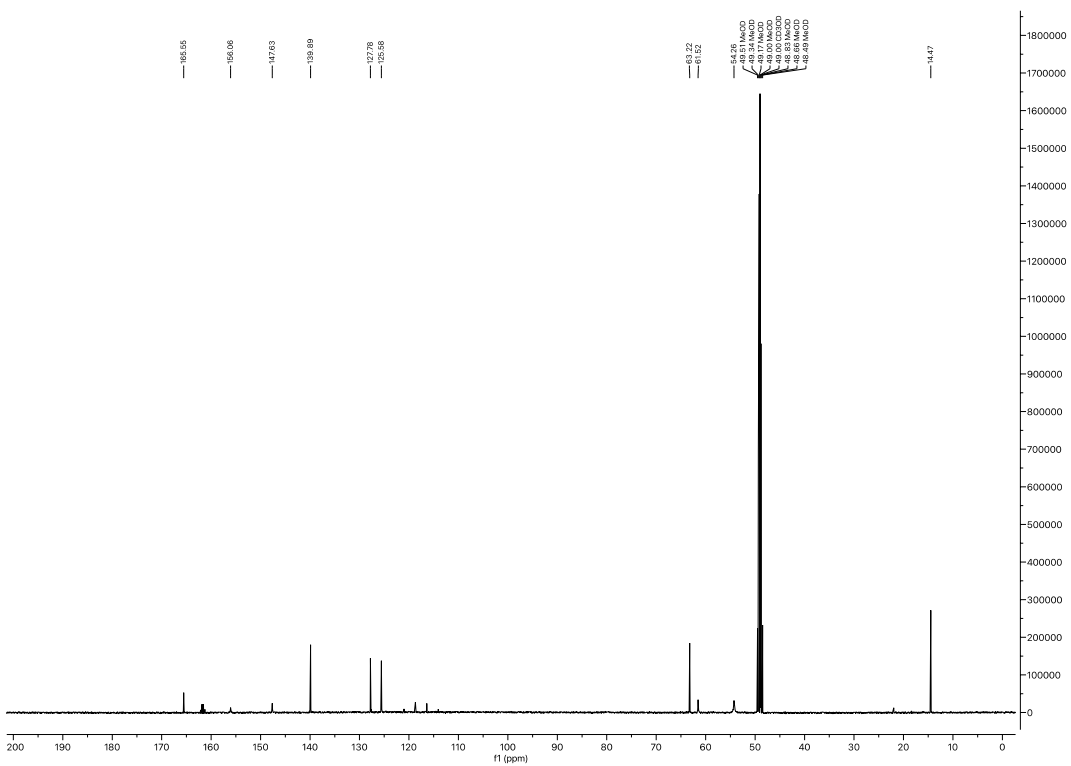

Figure S68 The  $^{13}\text{C}\{^1\text{H}\}$  NMR spectrum of triPic in MeOD

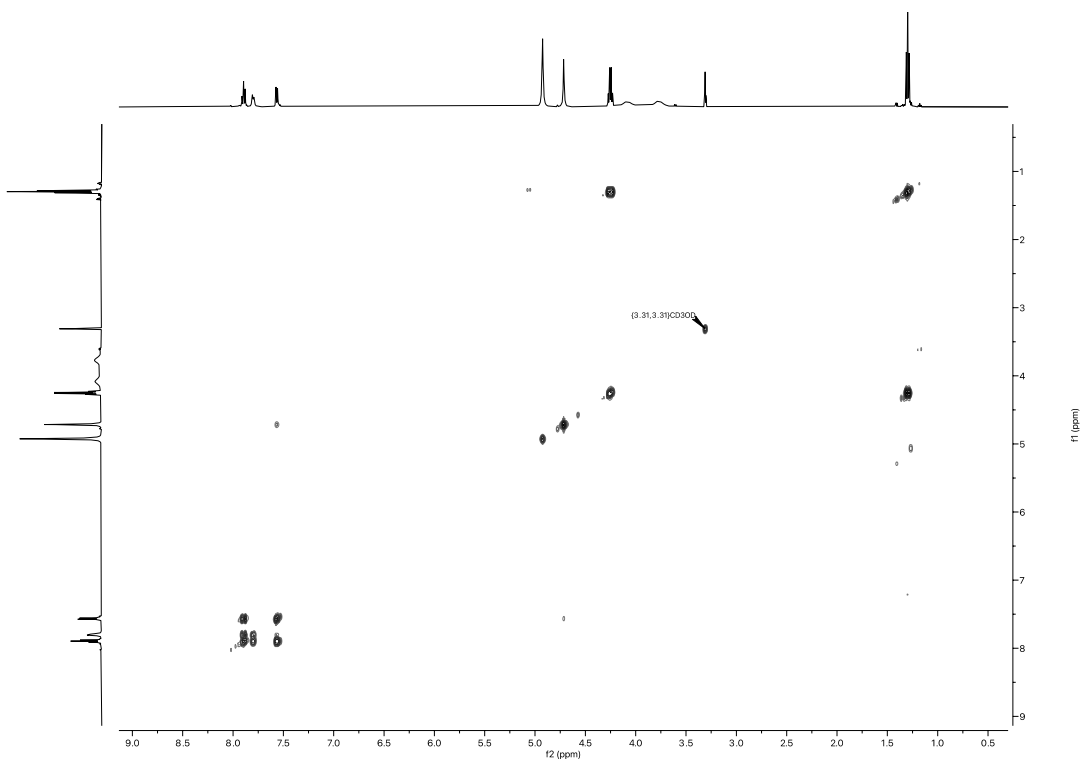

**Figure S69** The  $^1\text{H}$ - $^1\text{H}$  COSY NMR spectrum of triPic in MeOD.

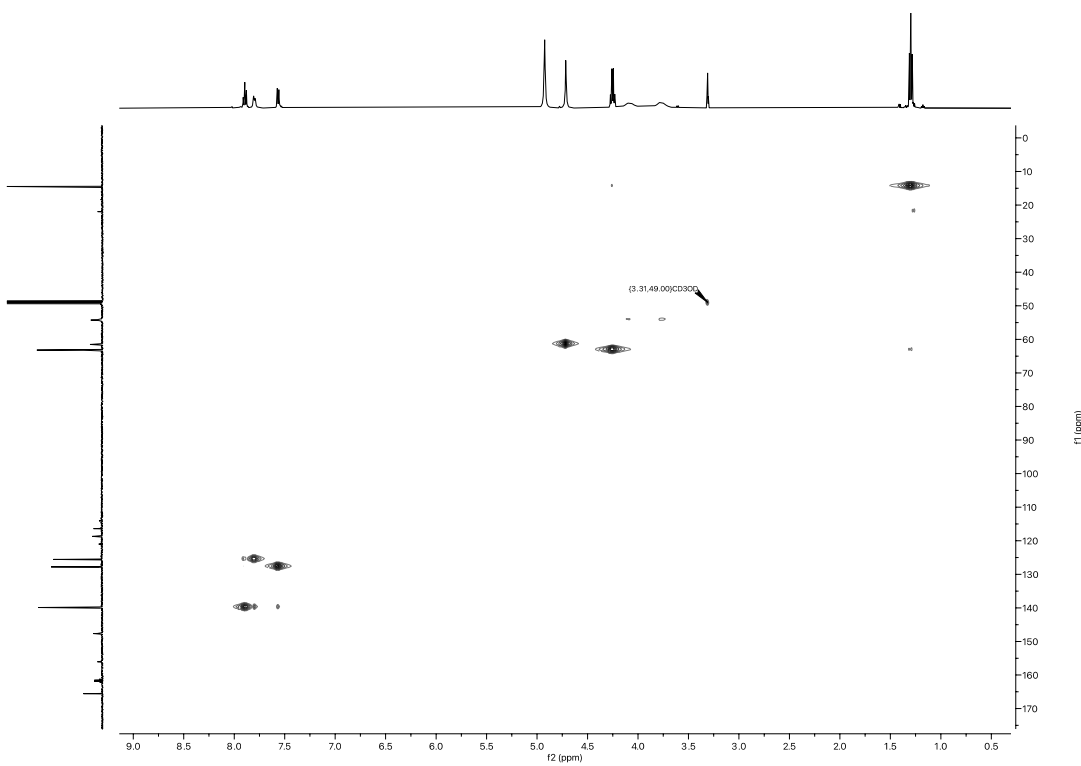

**Figure S70** The  $^1\text{H}$ - $^{13}\text{C}$  HSQC NMR spectrum of triPic in MeOD.

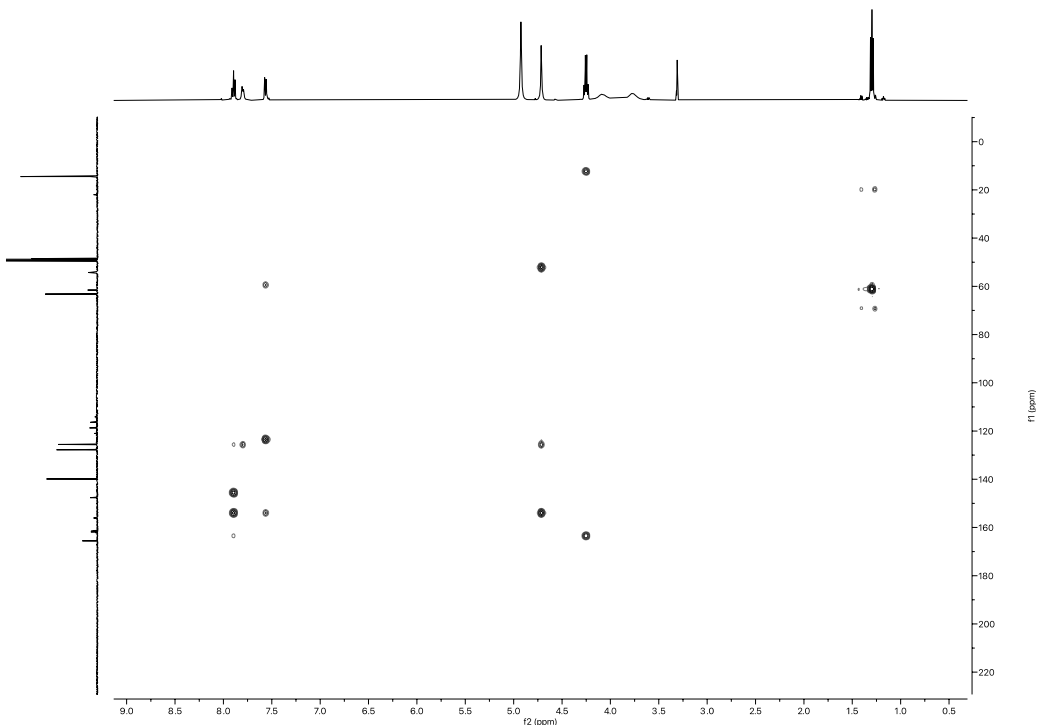

Figure S71 The  $^1\text{H}$ - $^{13}\text{C}$  HMBC NMR spectrum of triPic in MeOD.

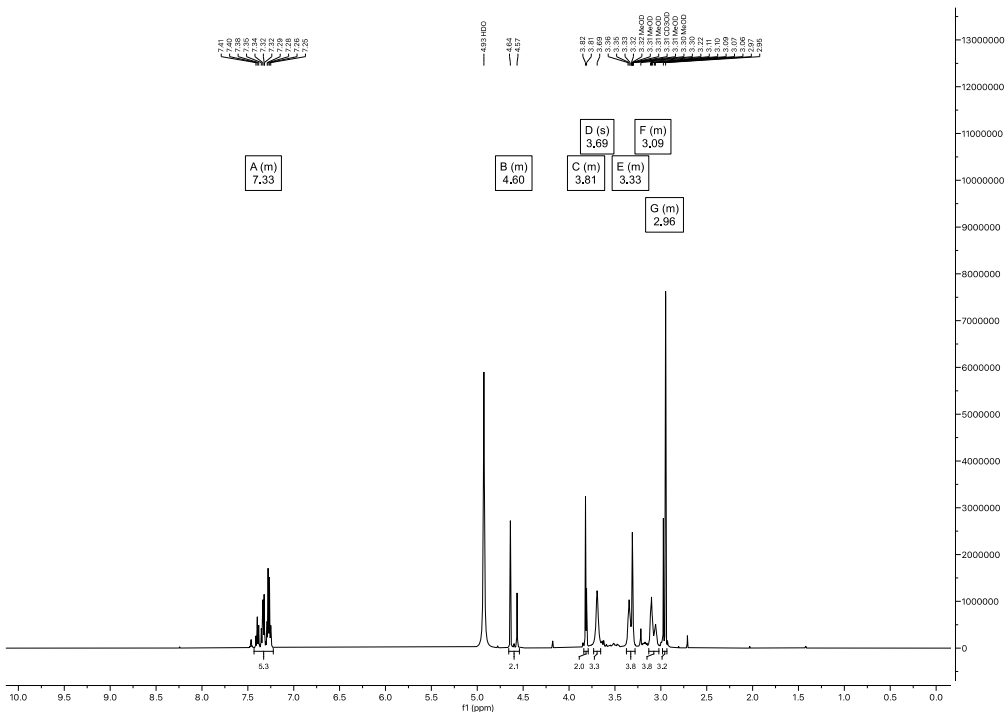

Figure S72 The  $^1\text{H}$  NMR spectrum of monoAm in MeOD.

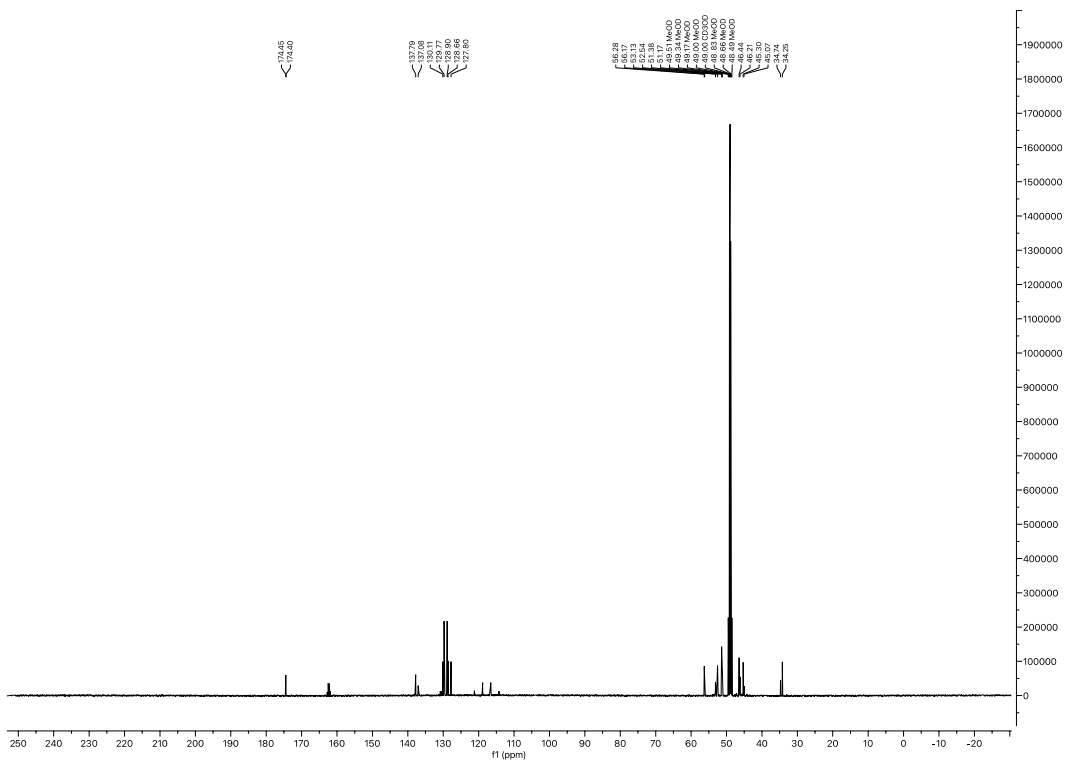

Figure S73 The  $^{13}\text{C}\{^1\text{H}\}$  NMR spectrum of monoAm in MeOD.

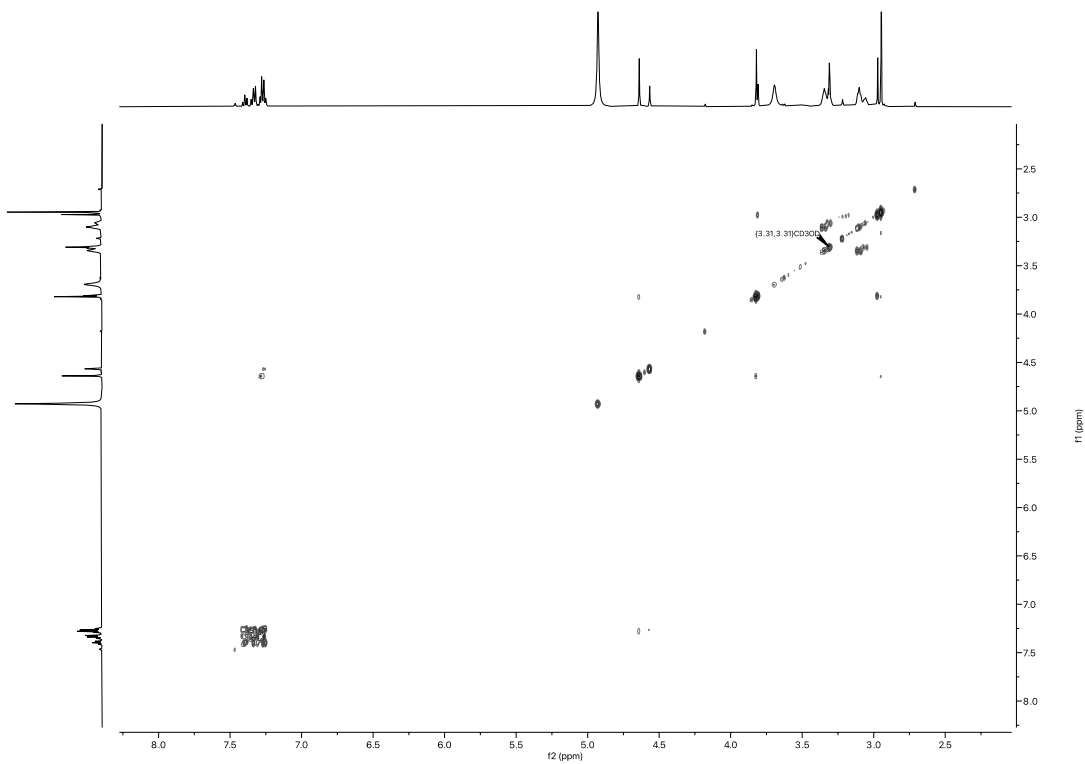

Figure S74 The  $^1\text{H}\text{-}^1\text{H}$  COSY NMR spectrum of monoAm in MeOD.

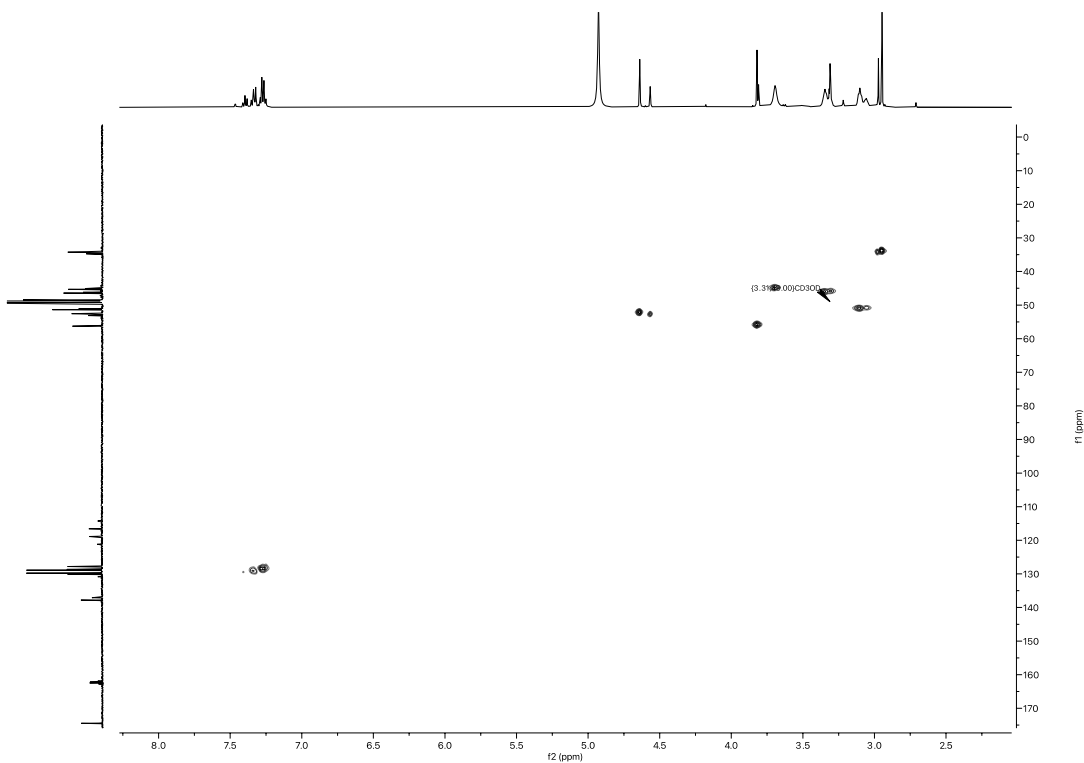

**Figure S75** The  $^1\text{H}$ - $^{13}\text{C}$  HSQC NMR spectrum of monoAm in MeOD.

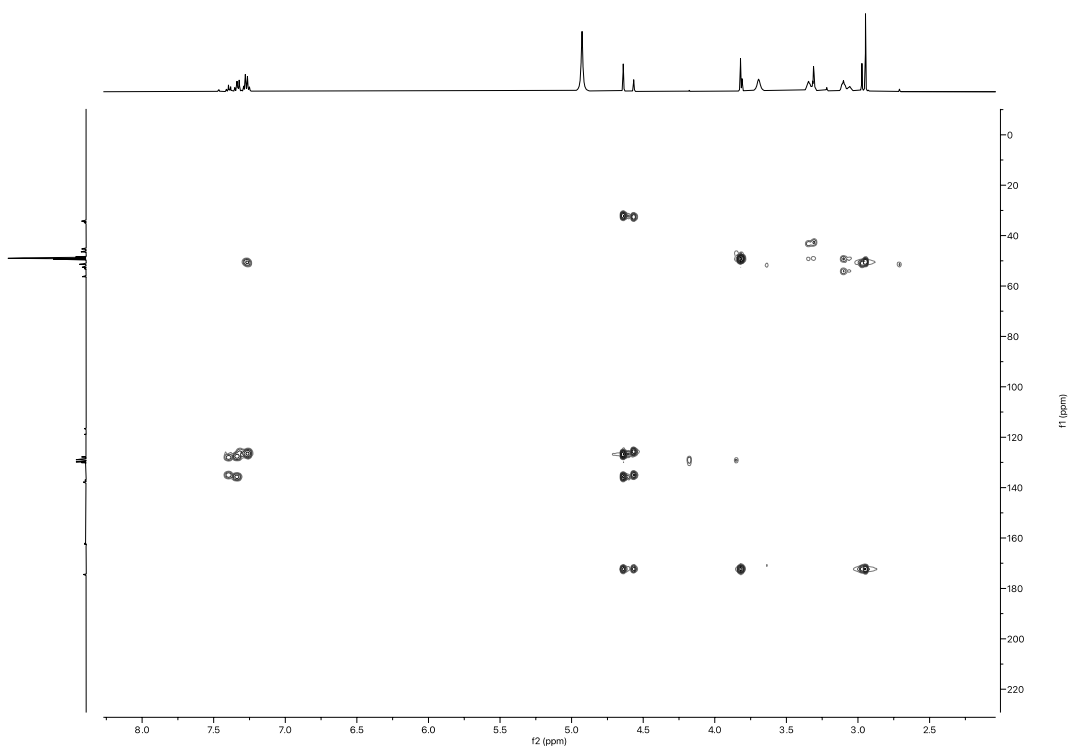

**Figure S76** The  $^1\text{H}$ - $^{13}\text{C}$  HMBC NMR spectrum of monoAm in MeOD.



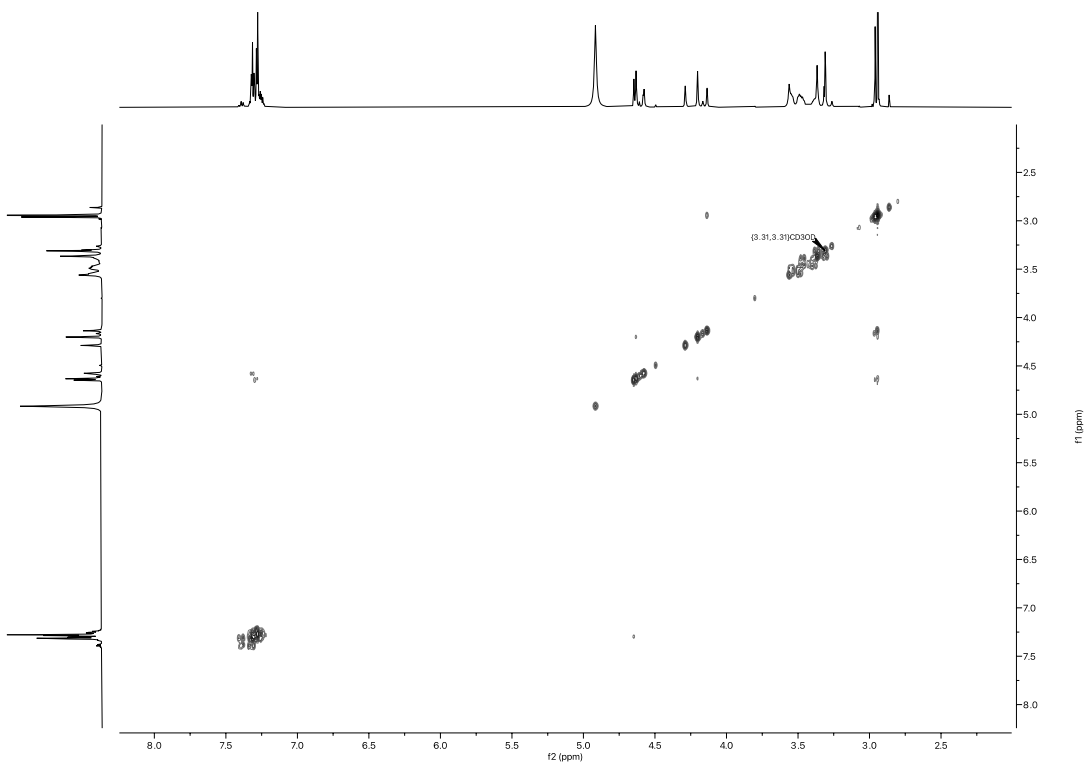

**Figure S79** The  $^1\text{H}$ - $^1\text{H}$  COSY NMR spectrum of diAm in MeOD.

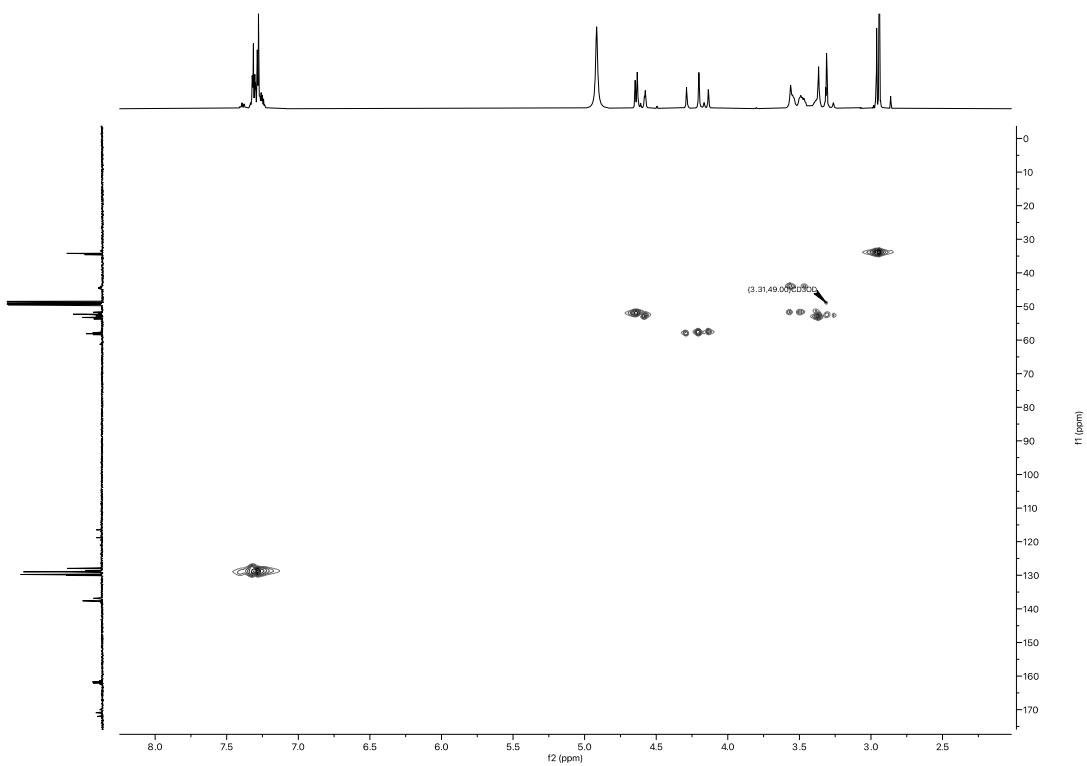

**Figure S80** The  $^1\text{H}$ - $^{13}\text{C}$  HSQC NMR spectrum of diAm in MeOD.

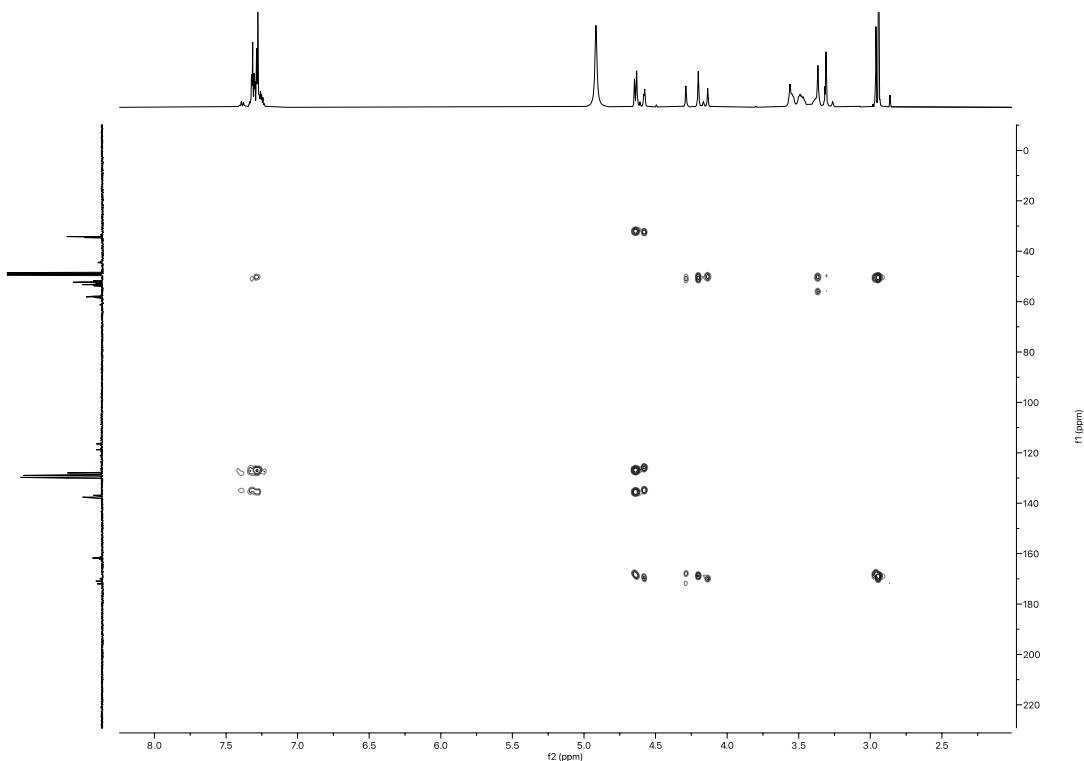

Figure S81 The  $^1\text{H}$ - $^{13}\text{C}$  HMBC NMR spectrum of diAm in MeOD.

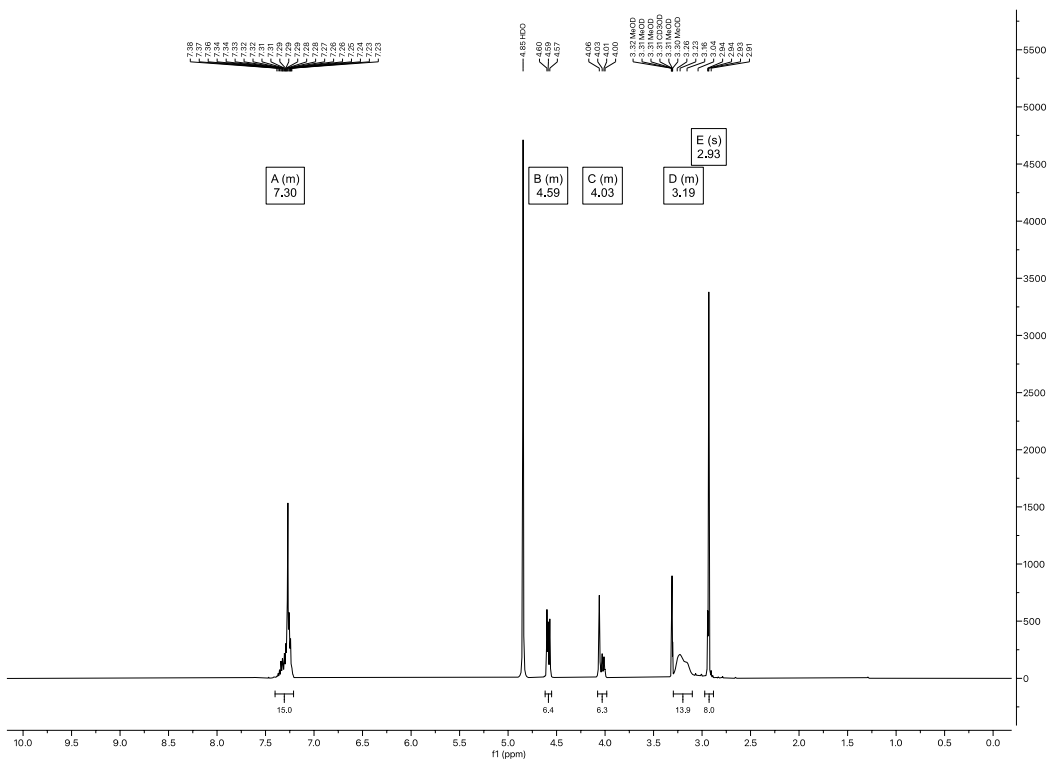

Figure S82 The  $^1\text{H}$  NMR spectrum of  $\text{L}^{030}$  in MeOD.



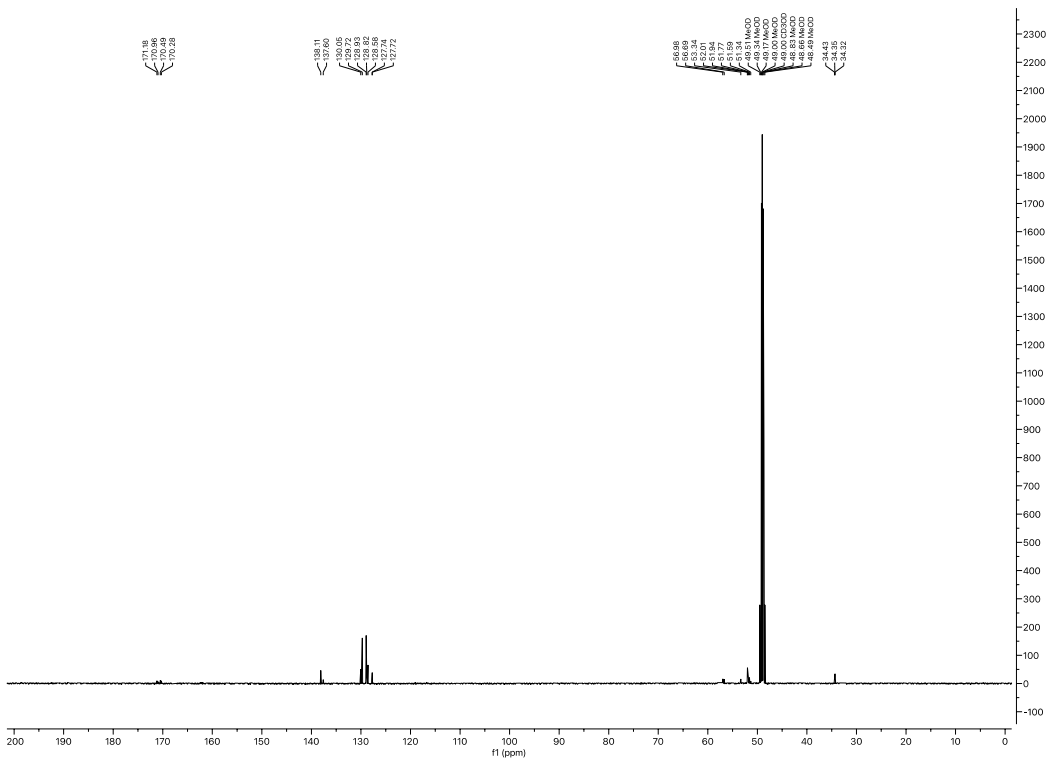

Figure S83 The  $^{13}\text{C}\{^1\text{H}\}$  NMR spectrum of **L<sup>030</sup>** in MeOD.

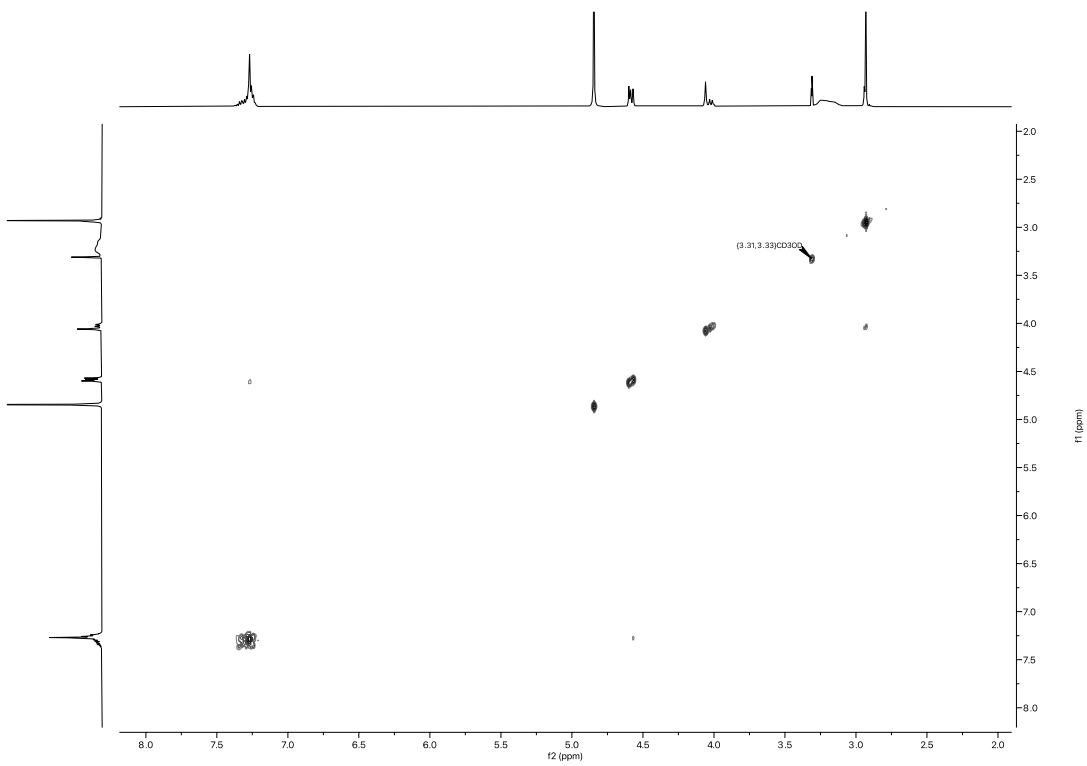

Figure S84 The  $^1\text{H}\text{-}^1\text{H}$  COSY NMR spectrum of **L<sup>030</sup>** in MeOD.

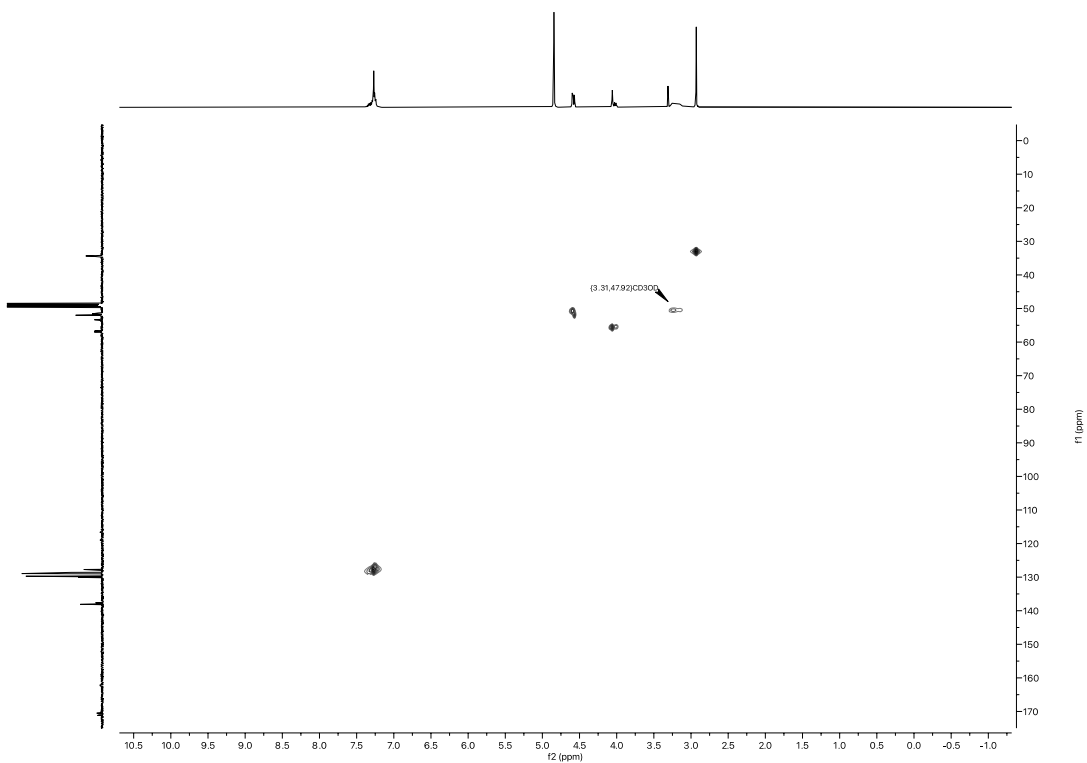

Figure S85 The  $^1\text{H}$ - $^{13}\text{C}$  HSQC NMR spectrum of  $\text{L}^{030}$  in MeOD.

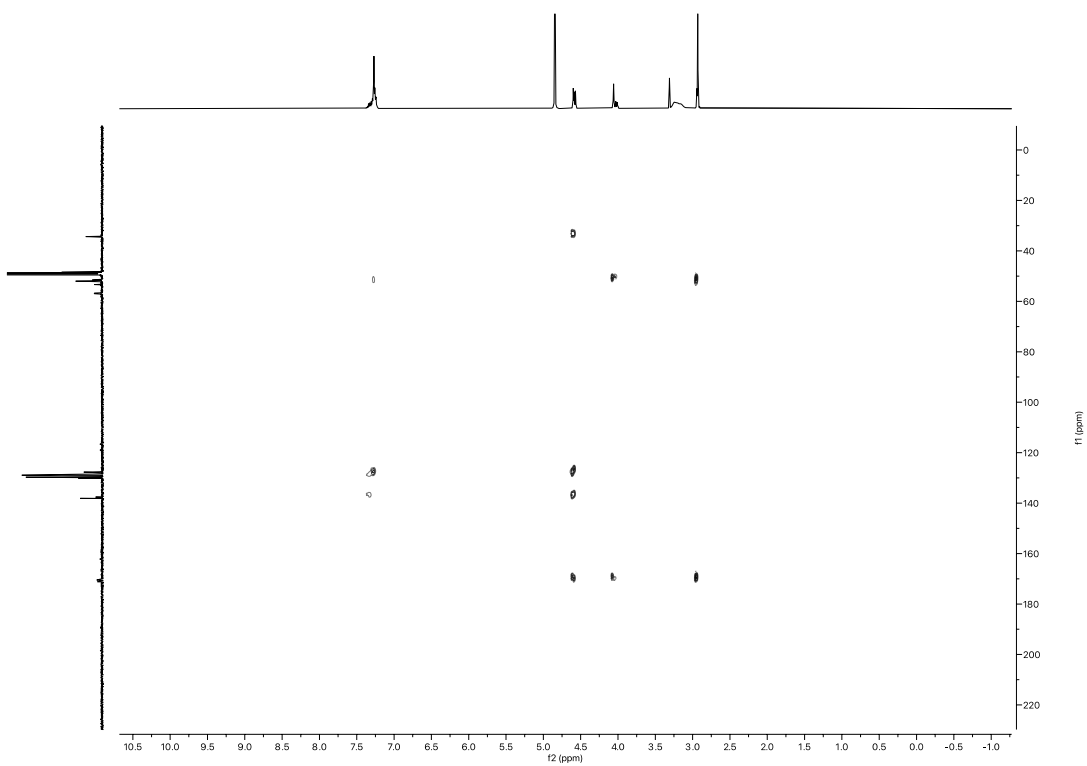

Figure S86 The  $^1\text{H}$ - $^{13}\text{C}$  HMBC NMR spectrum of  $\text{L}^{030}$  in MeOD.

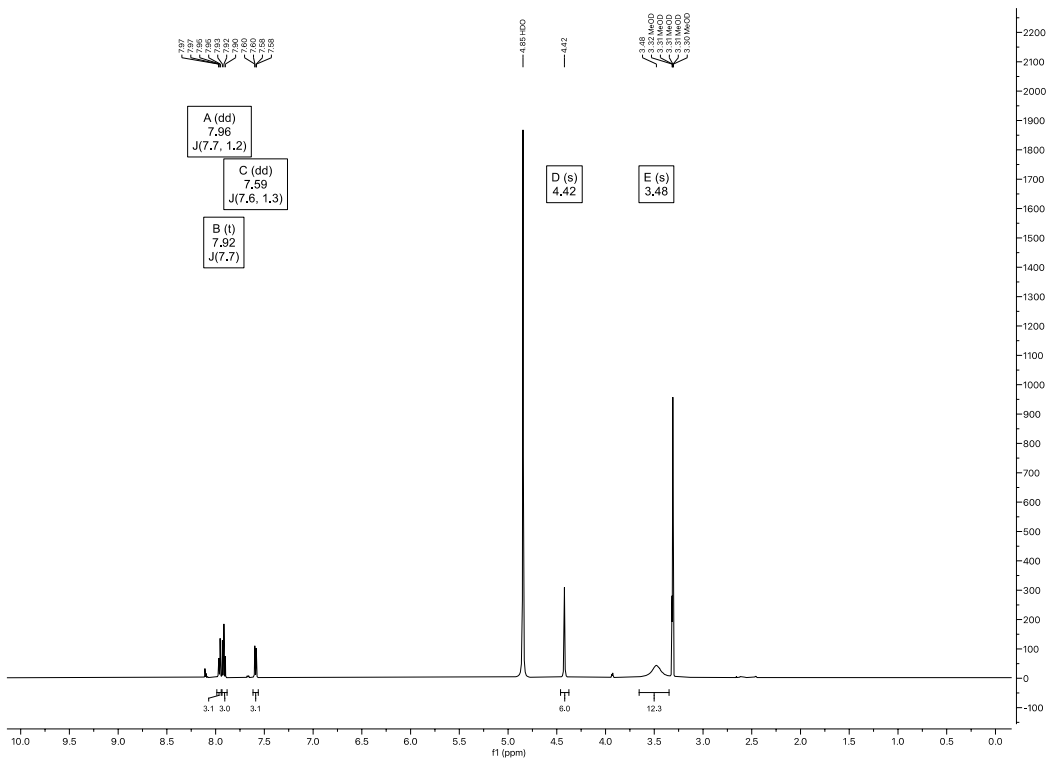

Figure S87 The  $^1\text{H}$  NMR spectrum of  $\text{H}_3\text{L}^{003}$  in MeOD.

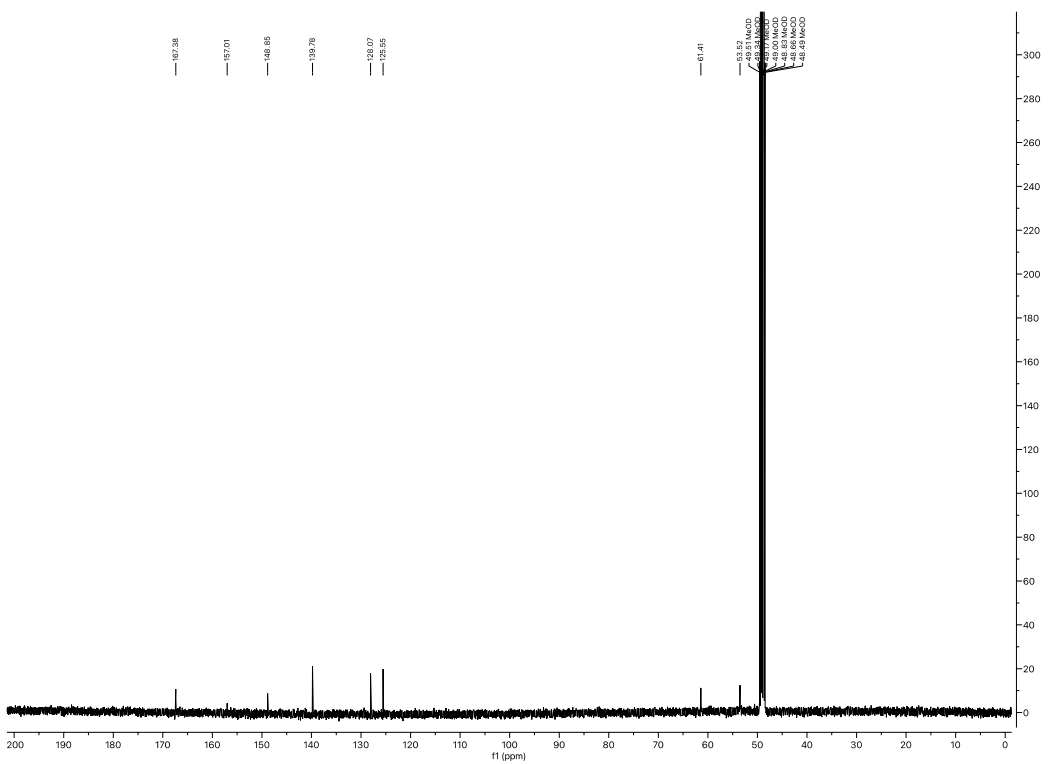

Figure S88 The  $^{13}\text{C}\{^1\text{H}\}$  NMR spectrum of  $\text{H}_3\text{L}^{003}$  in MeOD.

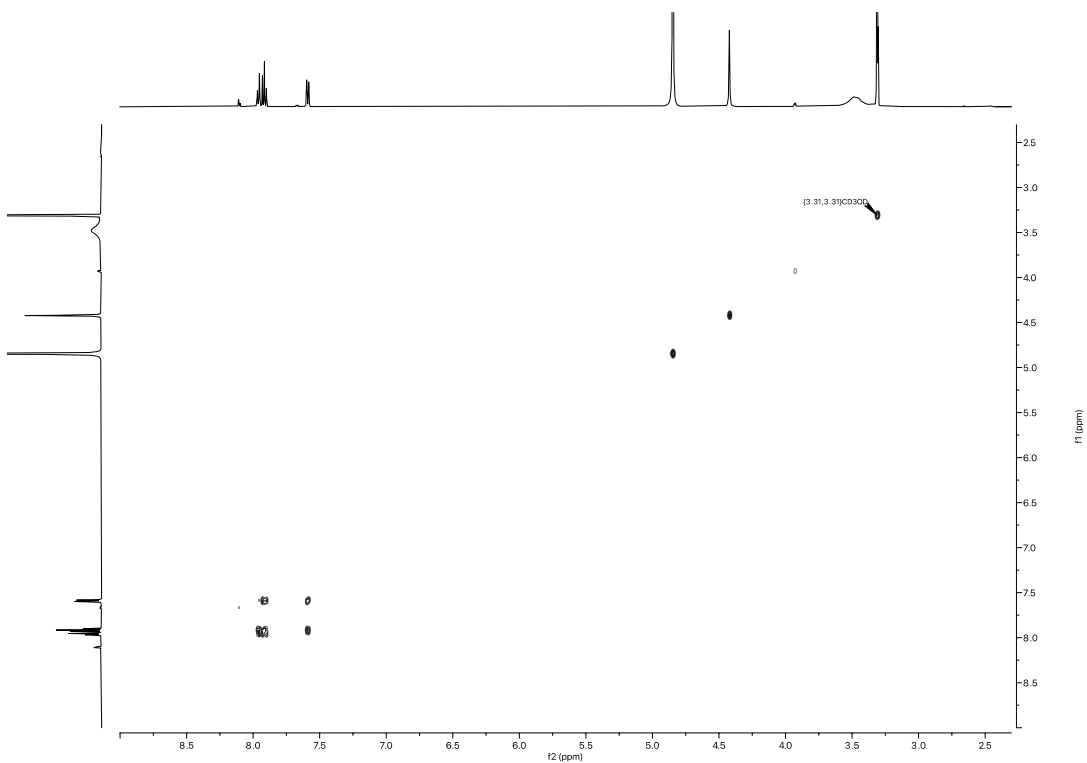

**Figure S89** The  $^1\text{H}$ - $^1\text{H}$  COSY NMR spectrum of  $\text{H}_3\text{L}^{003}$  in MeOD.

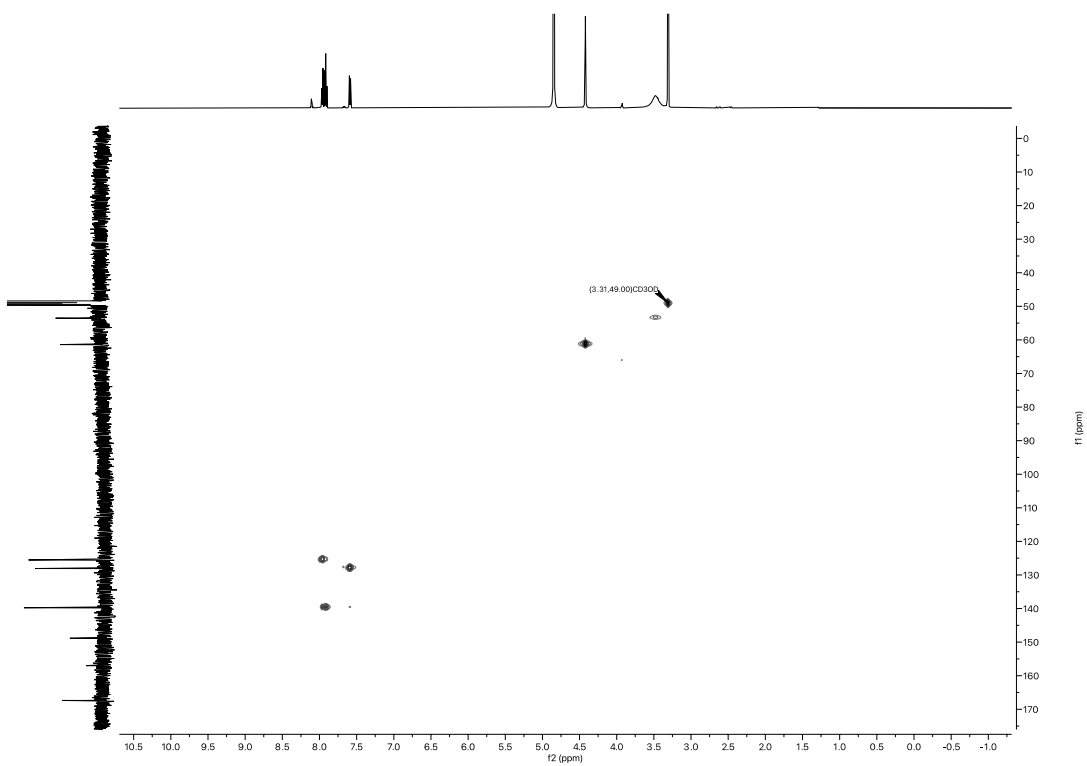

**Figure S90** The  $^1\text{H}$ - $^{13}\text{C}$  HSQC NMR spectrum of  $\text{H}_3\text{L}^{003}$  in MeOD.

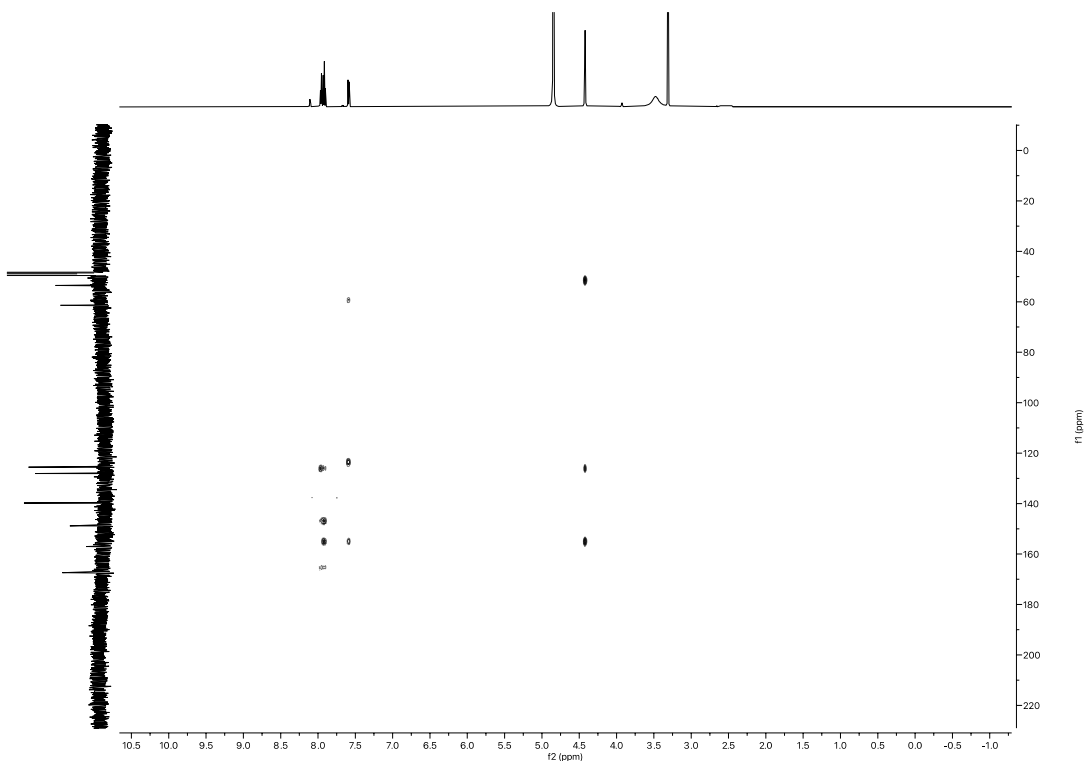

Figure S91 The  $^1\text{H}$ - $^{13}\text{C}$  HMBC NMR spectrum of  $\text{H}_3\text{L}^{003}$  in MeOD.

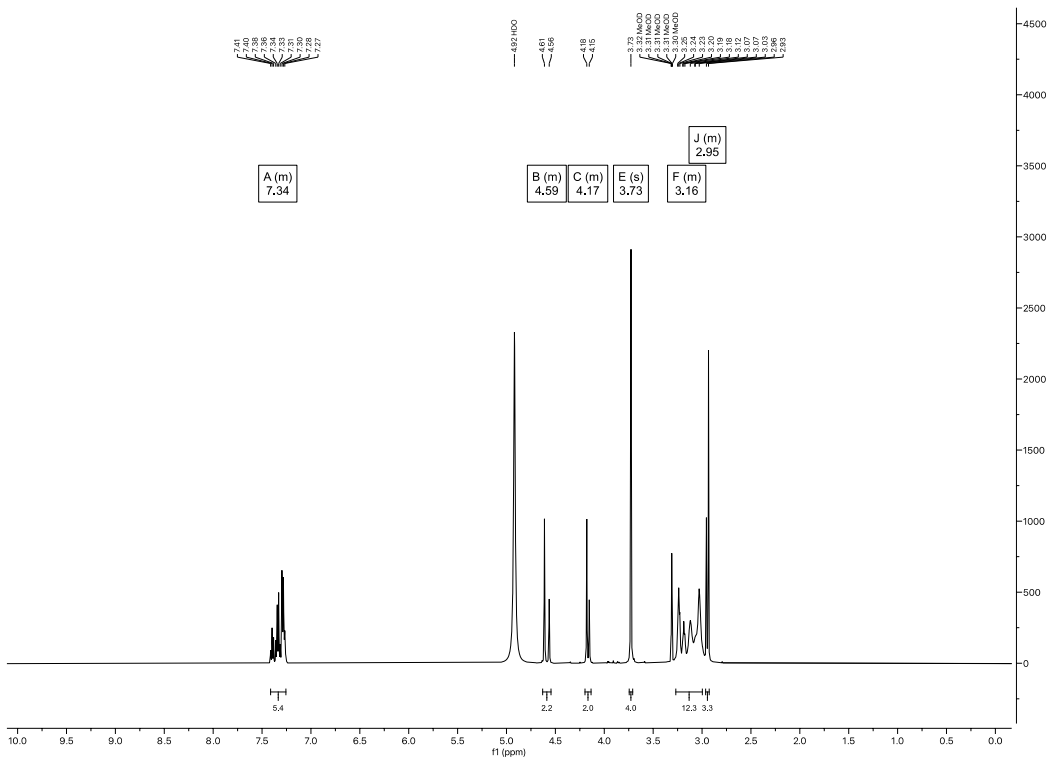

Figure S92 The  $^1\text{H}$  NMR spectrum of  $\text{H}_2\text{L}^{210}$  in MeOD.

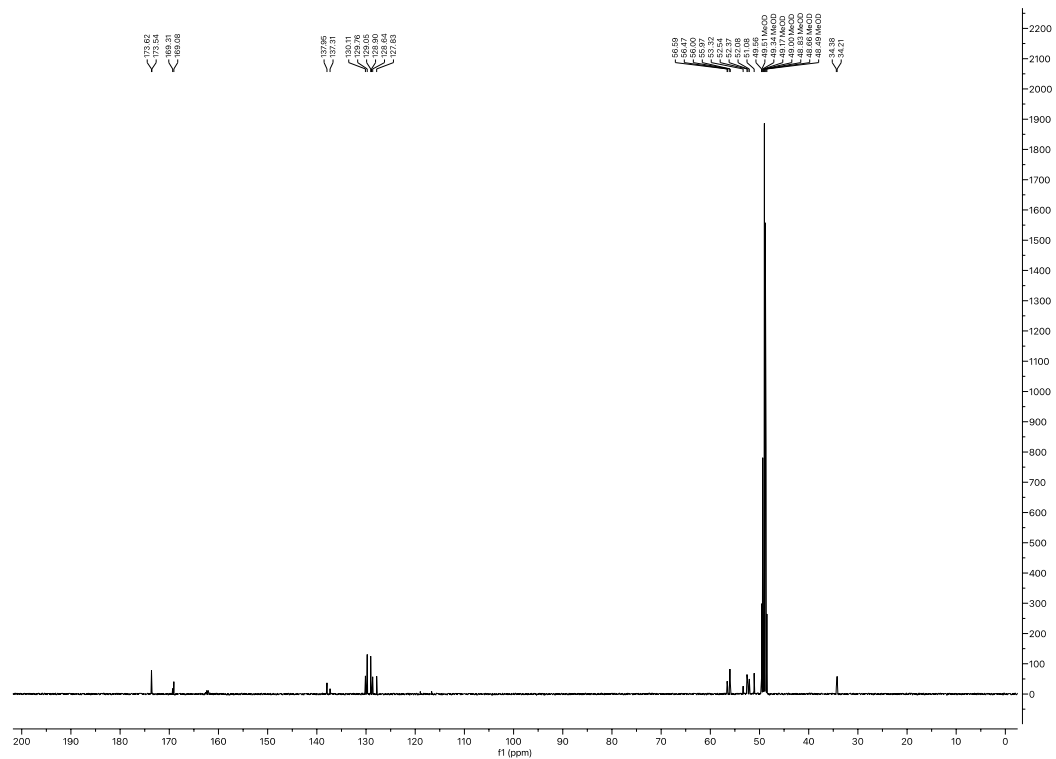

**Figure S93** The  $^{13}\text{C}\{^1\text{H}\}$  NMR spectrum of  $\text{H}_2\text{L}^{210}$  in MeOD.

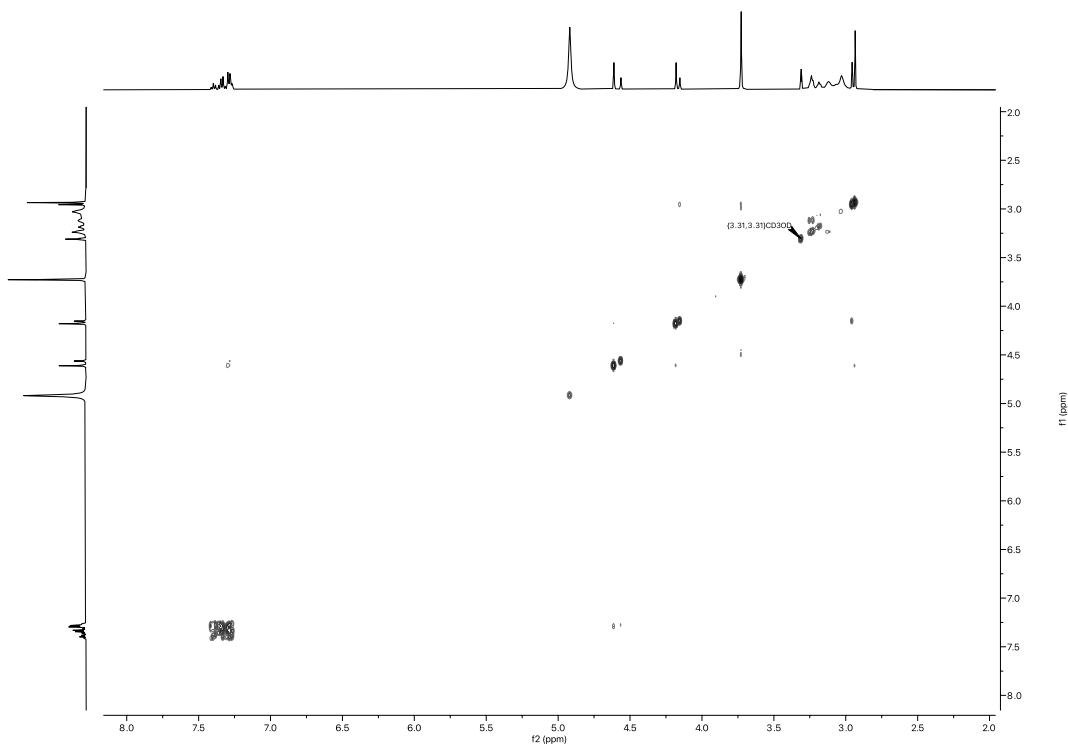

**Figure S94** The  $^1\text{H}$ - $^1\text{H}$  COSY NMR spectrum of  $\text{H}_2\text{L}^{210}$  in MeOD.

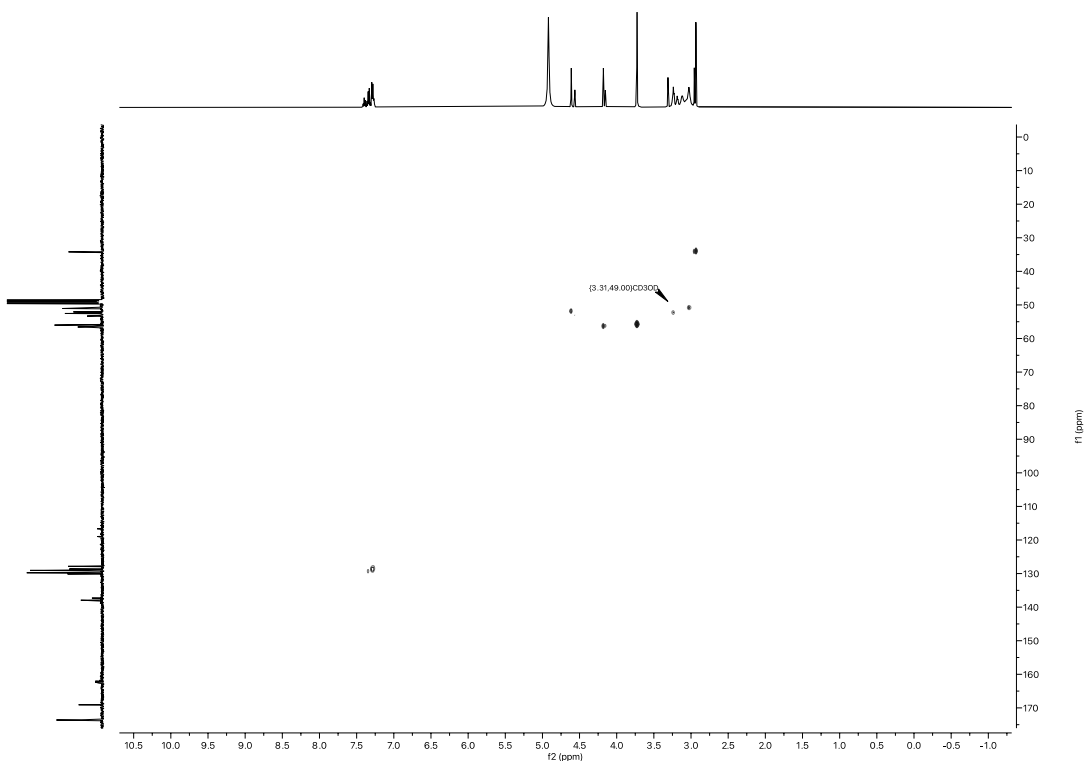

**Figure S95** The <sup>1</sup>H-<sup>13</sup>C HSQC NMR spectrum of H<sub>2</sub>L<sup>210</sup> in MeOD.

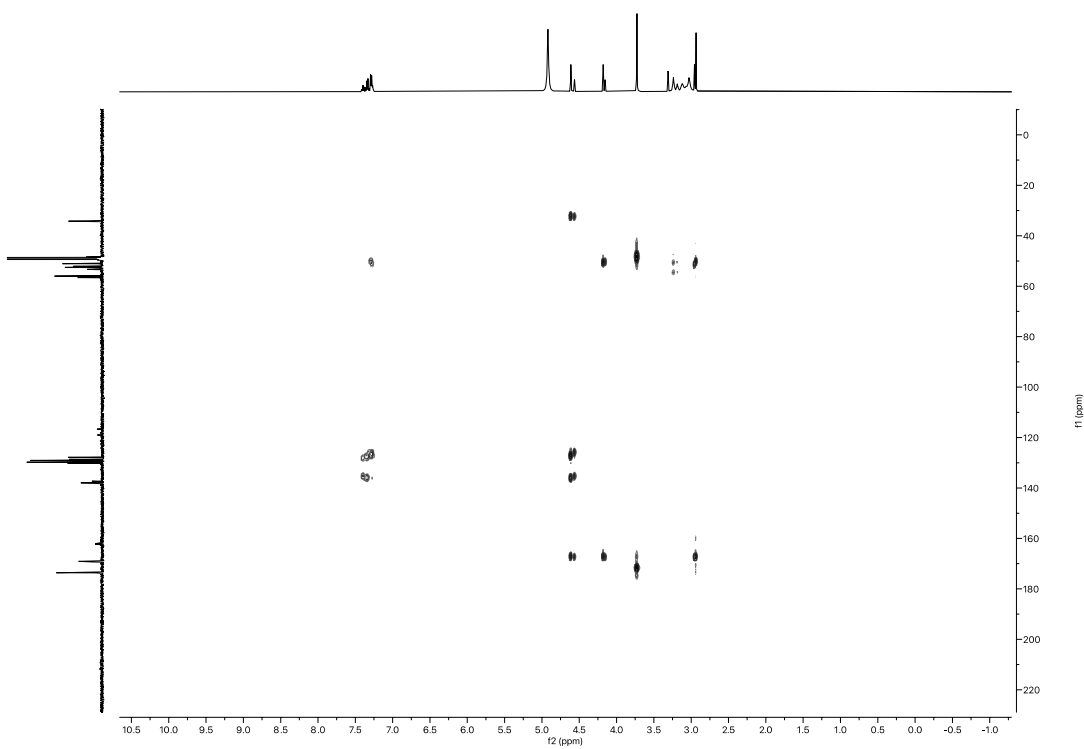

**Figure S96** The <sup>1</sup>H-<sup>13</sup>C HMBC NMR spectrum of H<sub>2</sub>L<sup>210</sup> in MeOD.





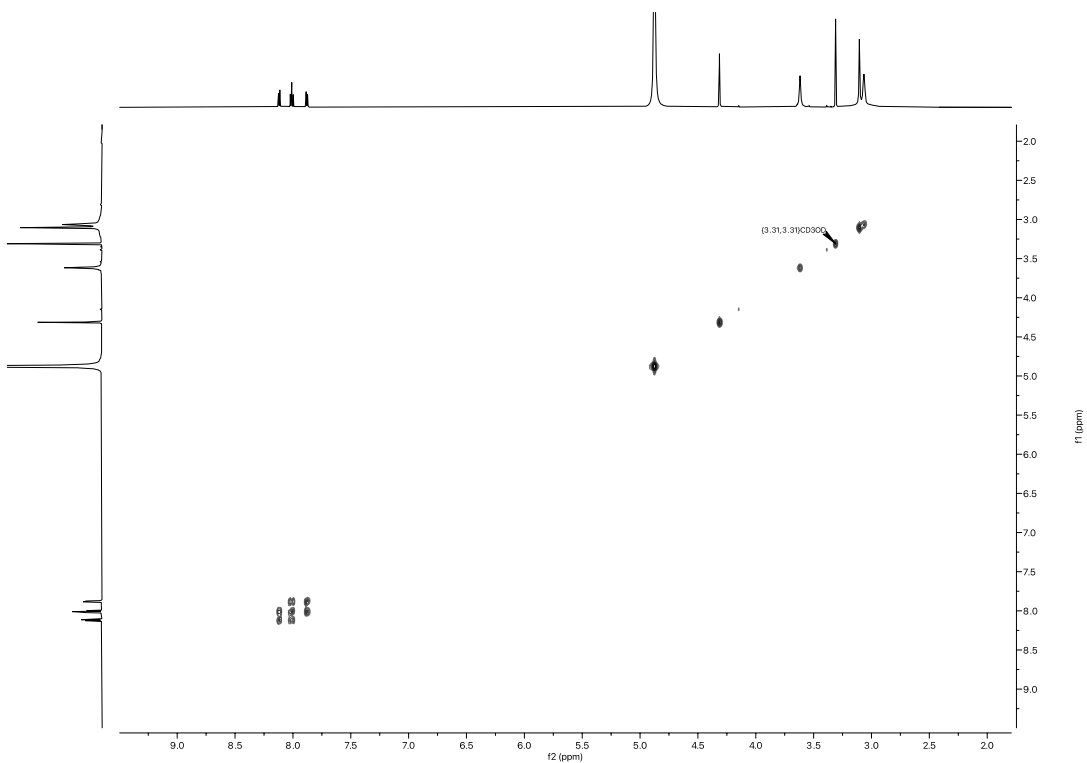

Figure S99 The  $^1\text{H}$ - $^1\text{H}$  COSY NMR spectrum of  $\text{H}_3\text{L}^{201}$  in MeOD.

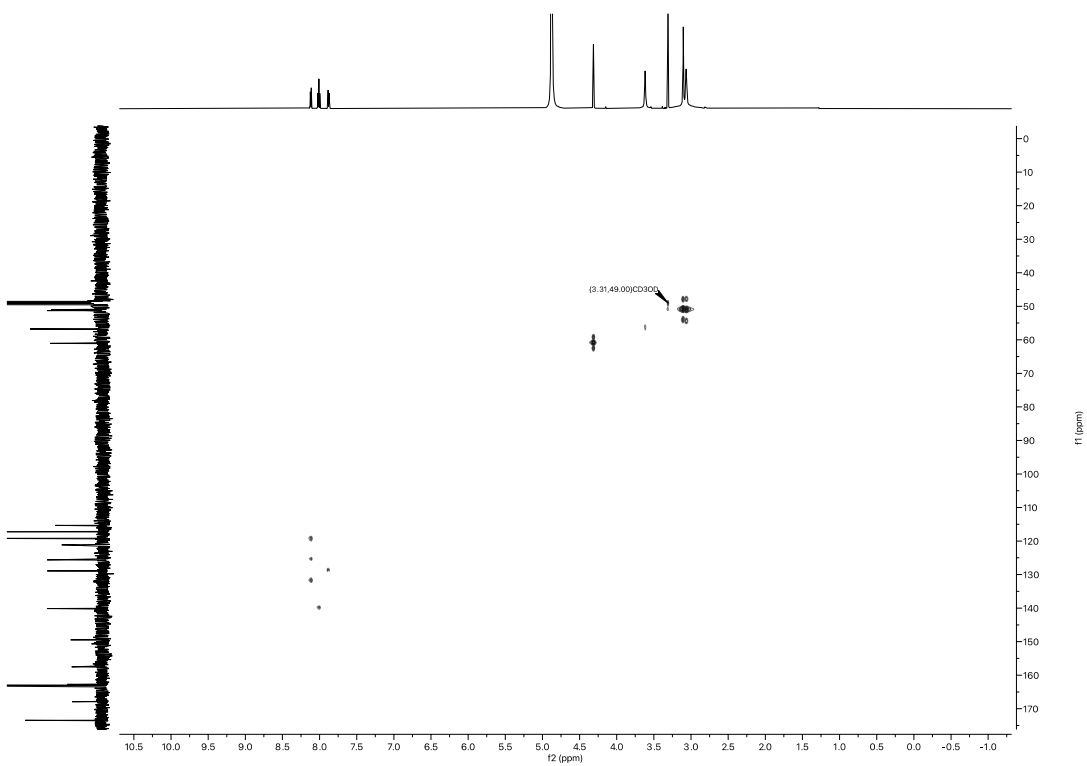

Figure S100 The  $^1\text{H}$ - $^{13}\text{C}$  HSQC NMR spectrum of  $\text{H}_3\text{L}^{201}$  in MeOD.

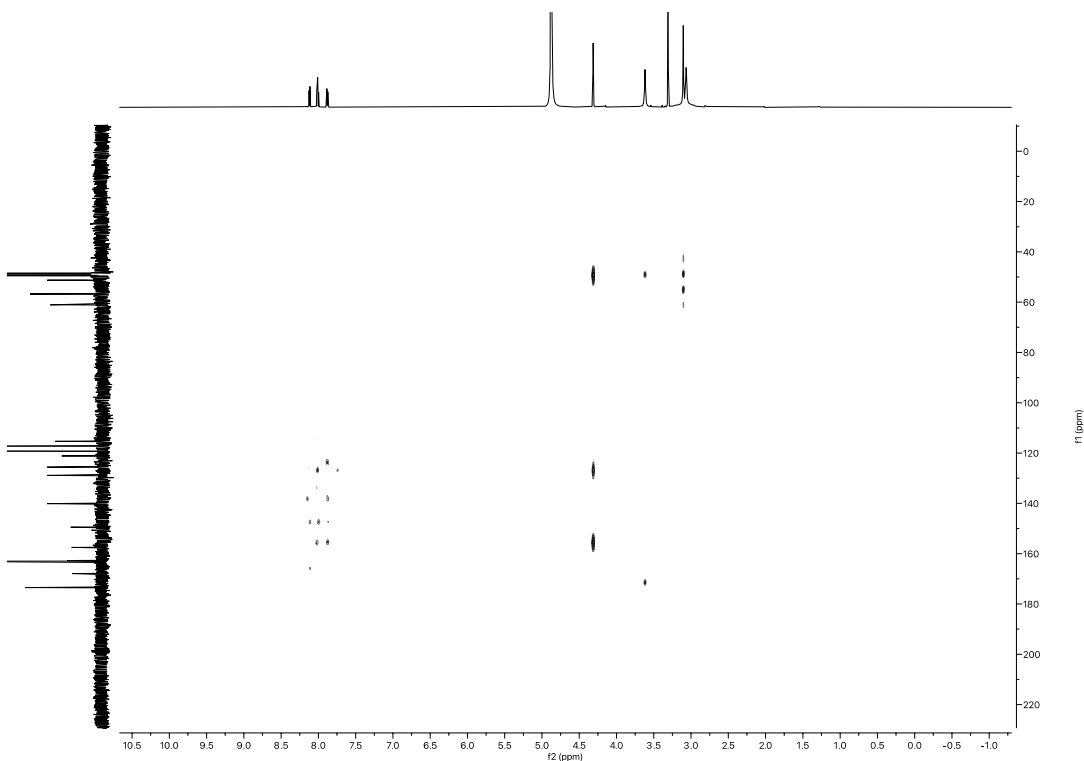

Figure S101 The  $^1\text{H}$ - $^{13}\text{C}$  HMBC NMR spectrum of  $\text{H}_3\text{L}^{201}$  in MeOD.

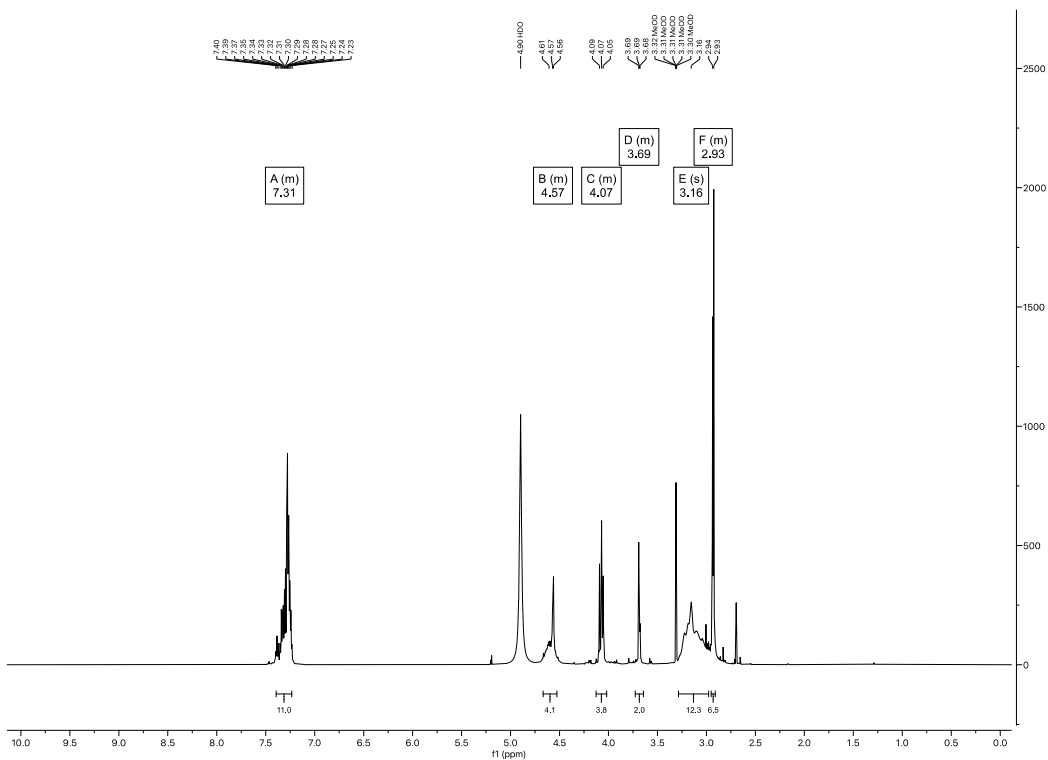

Figure S102 The  $^1\text{H}$  NMR spectrum of  $\text{HL}^{120}$  in MeOD.

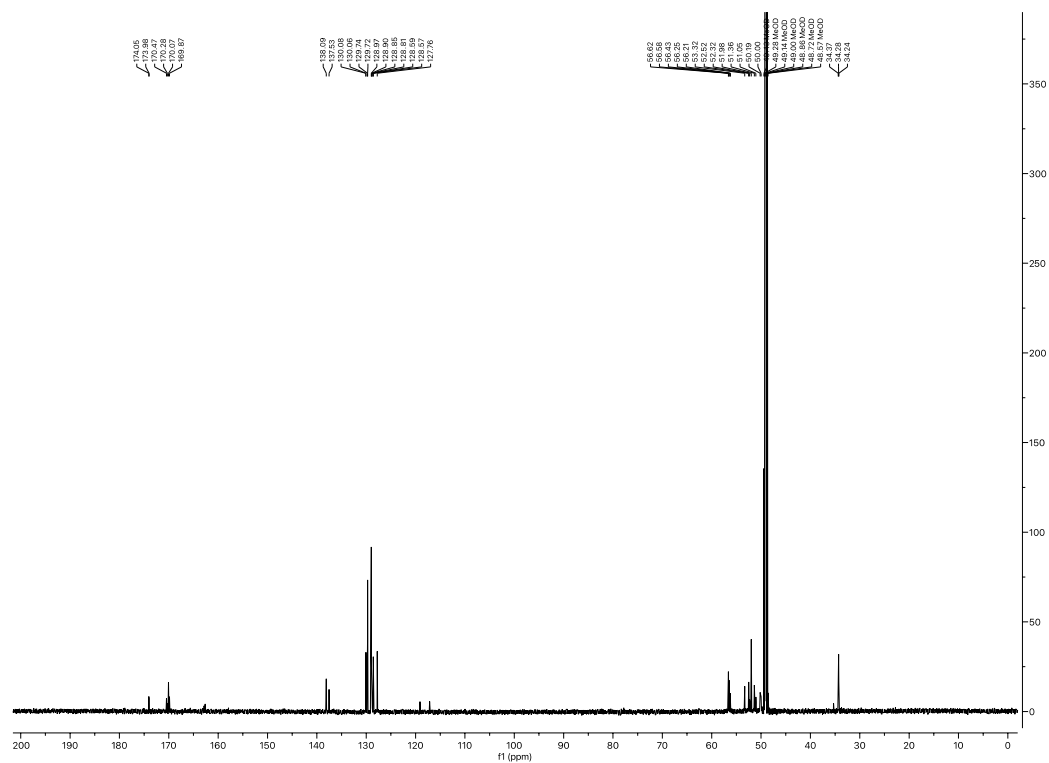

Figure S103 The  $^{13}\text{C}\{^1\text{H}\}$  NMR spectrum of HL $^{120}$  in MeOD.

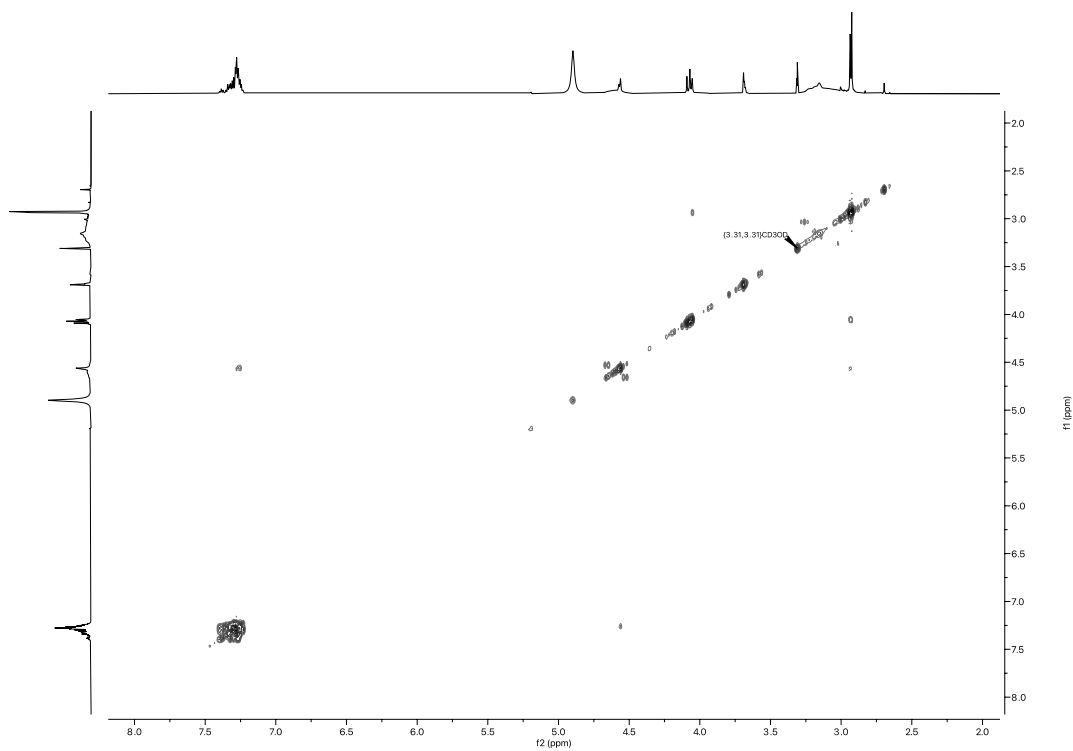

Figure S104 The  $^1\text{H}\text{-}^1\text{H}$  COSY NMR spectrum of HL $^{120}$  in MeOD.

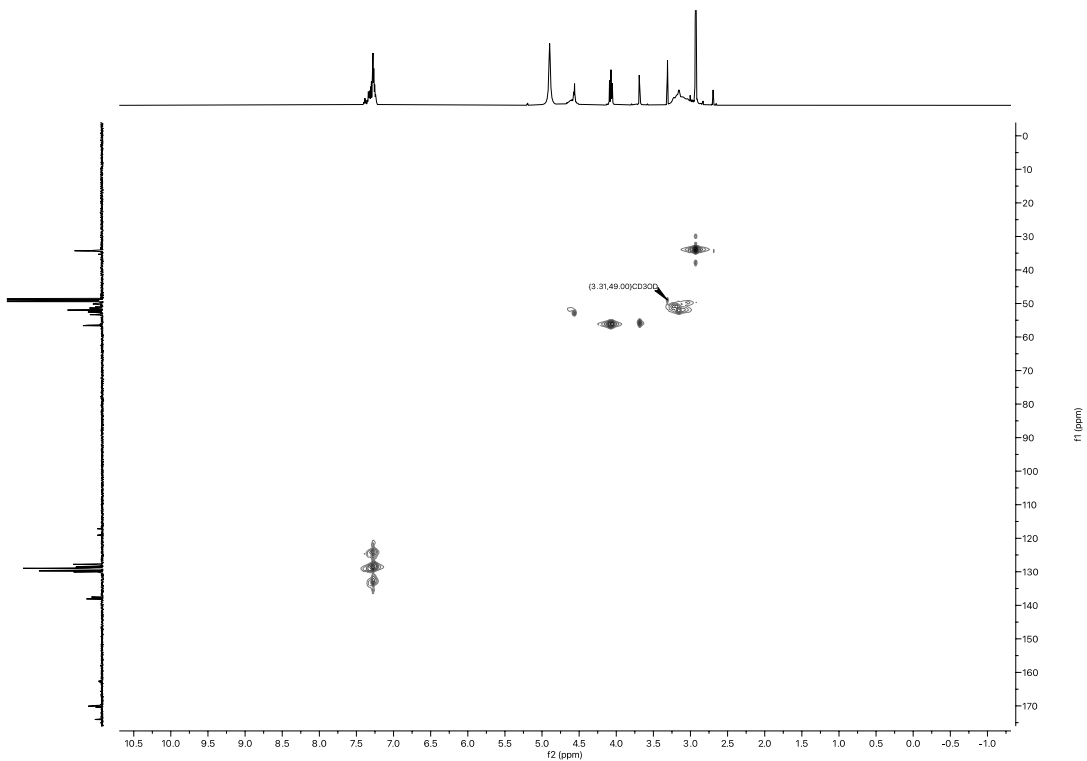

**Figure S105** The  $^1\text{H}$ - $^{13}\text{C}$  HSQC NMR spectrum of HL<sup>120</sup> in MeOD.

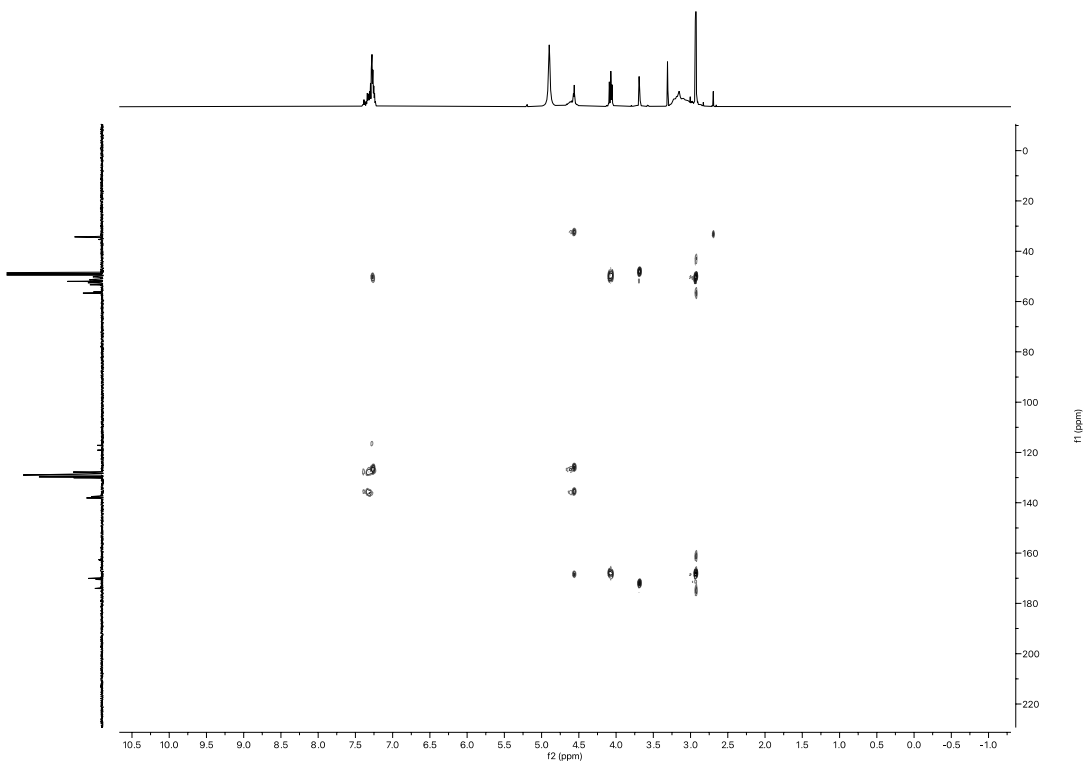

**Figure S106** The  $^1\text{H}$ - $^{13}\text{C}$  HMBC NMR spectrum of HL<sup>120</sup> in MeOD.

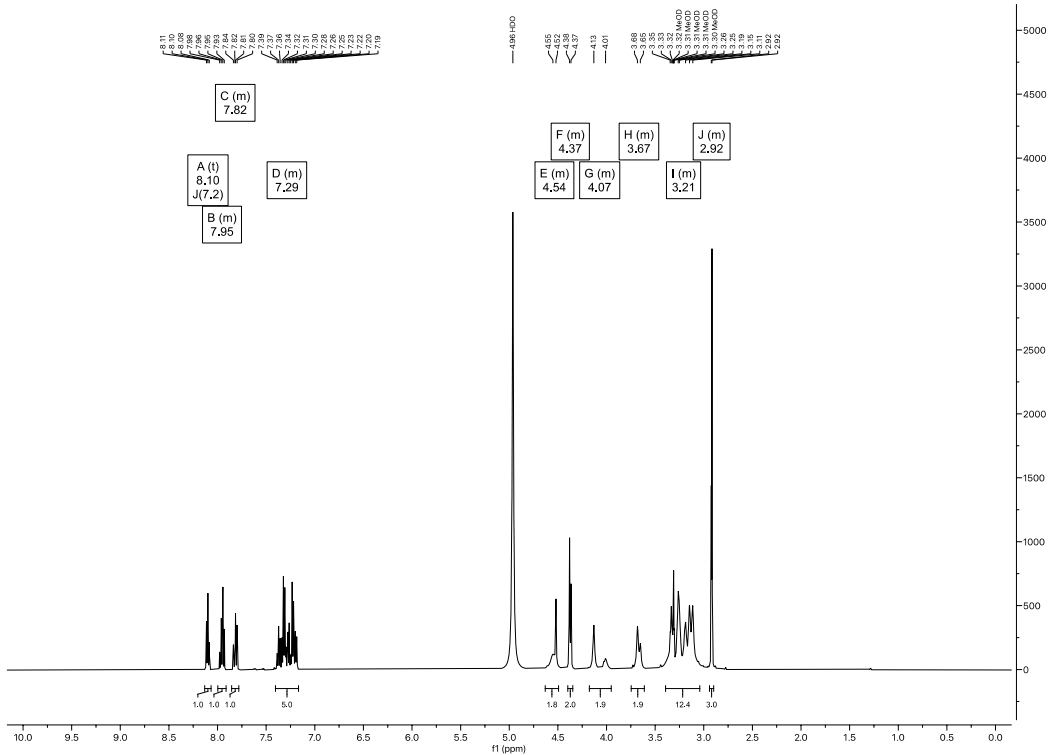

Figure S107 The  ${}^1\text{H}$  NMR spectrum of  $\text{H}_2\text{L}^{111}$  in MeOD.

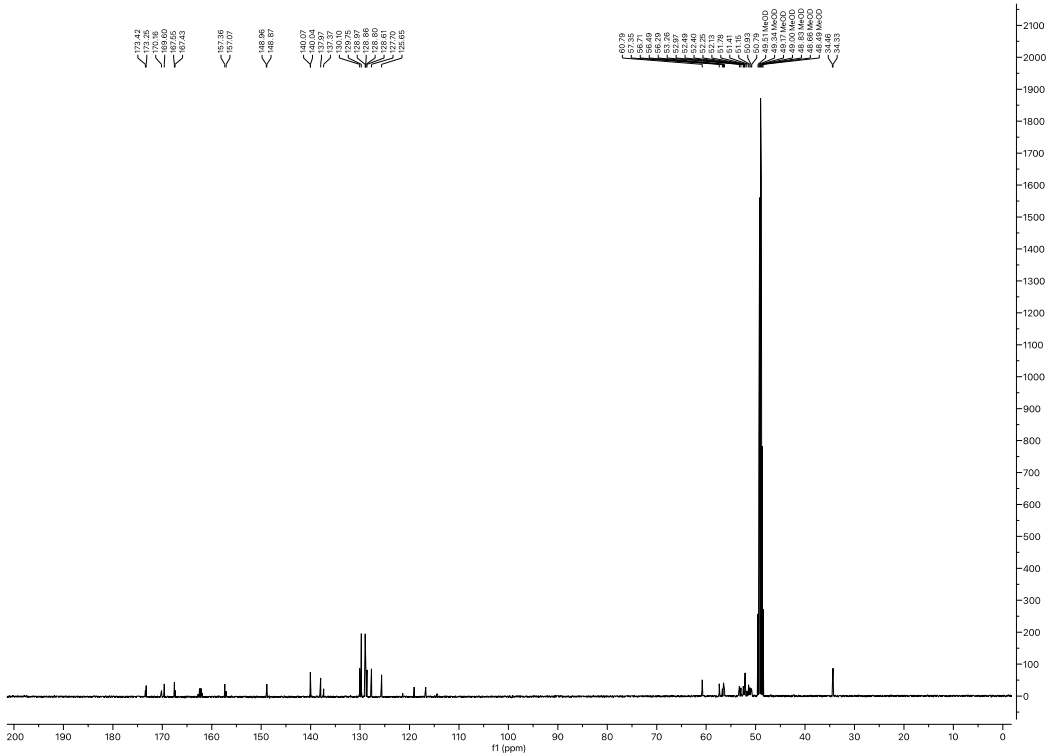

Figure S108 The  ${}^{13}\text{C}\{{}^1\text{H}\}$  NMR spectrum of  $\text{H}_2\text{L}^{111}$  in MeOD.

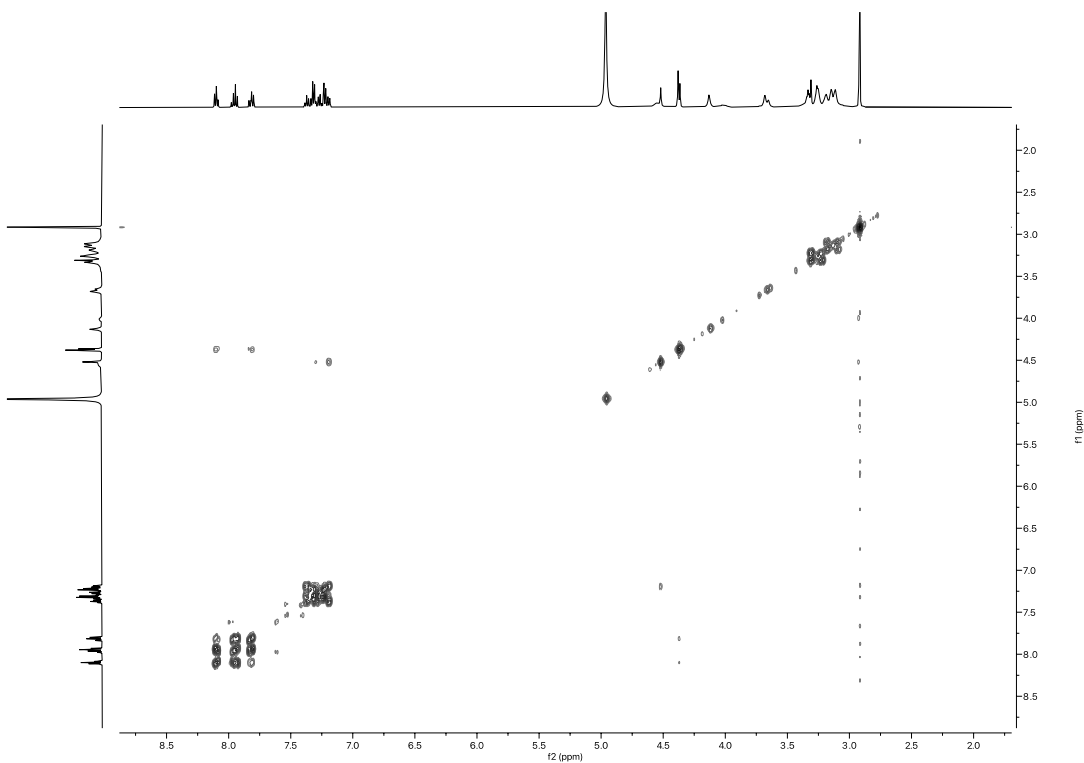

**Figure S109** The  $^1\text{H}$ - $^1\text{H}$  COSY NMR spectrum of  $\text{H}_2\text{L}^{111}$  in MeOD.

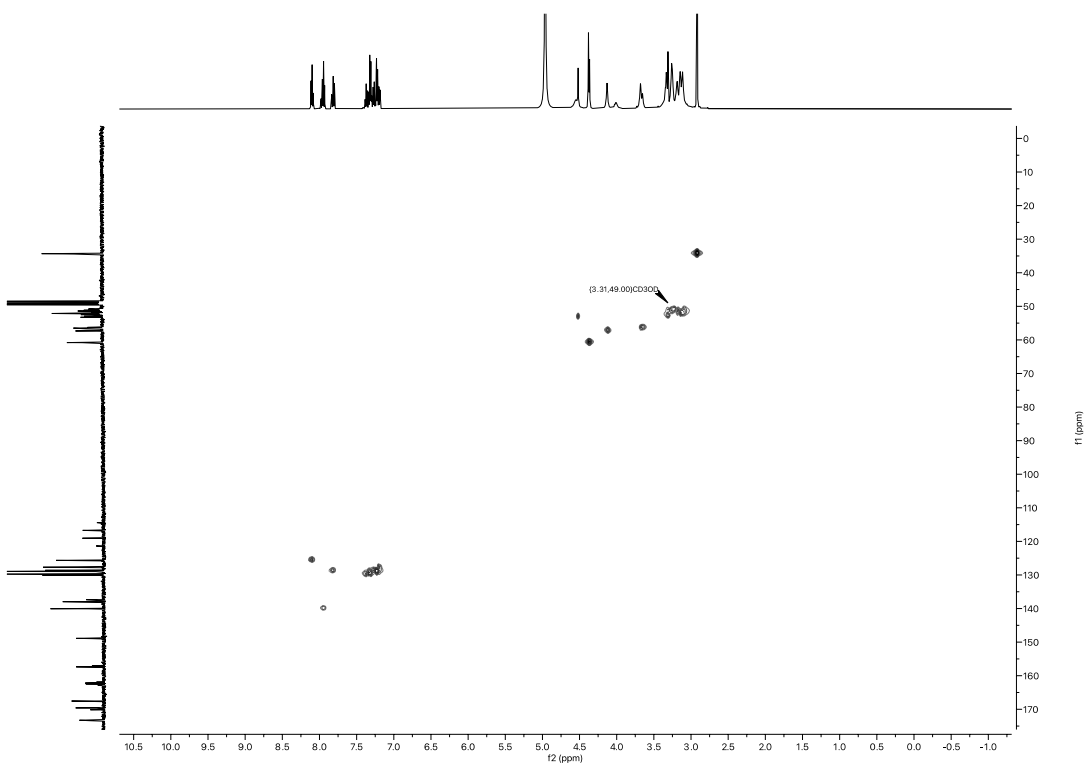

**Figure S110** The  $^1\text{H}$ - $^{13}\text{C}$  HSQC NMR spectrum of  $\text{H}_2\text{L}^{111}$  in MeOD.

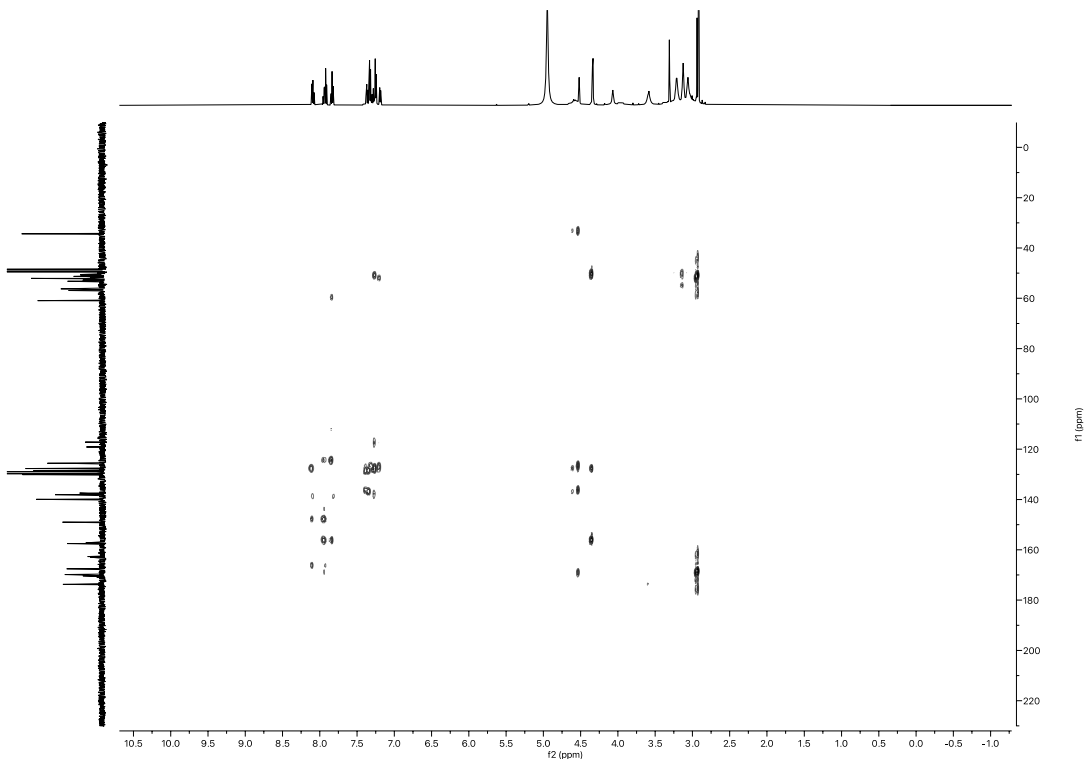

Figure S111 The  $^1\text{H}$ - $^{13}\text{C}$  HMBC NMR spectrum of  $\text{H}_2\text{L}^{111}$  in MeOD.

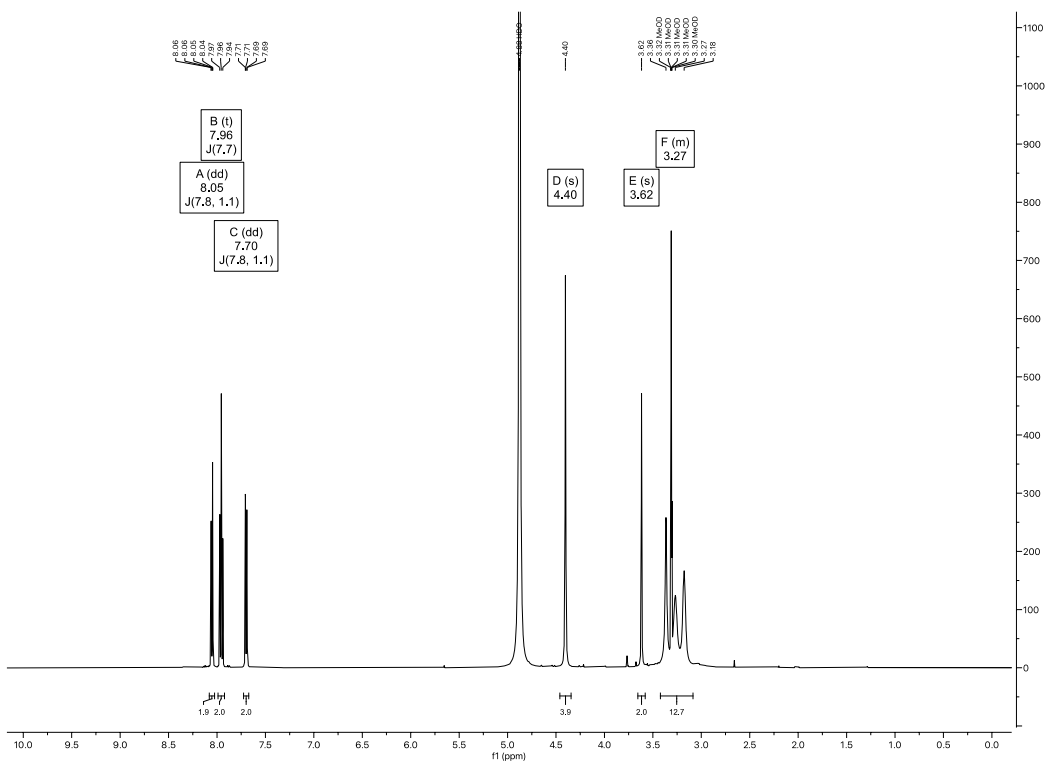

Figure S112 The  $^1\text{H}$  NMR spectrum of  $\text{H}_3\text{L}^{102}$  in MeOD.

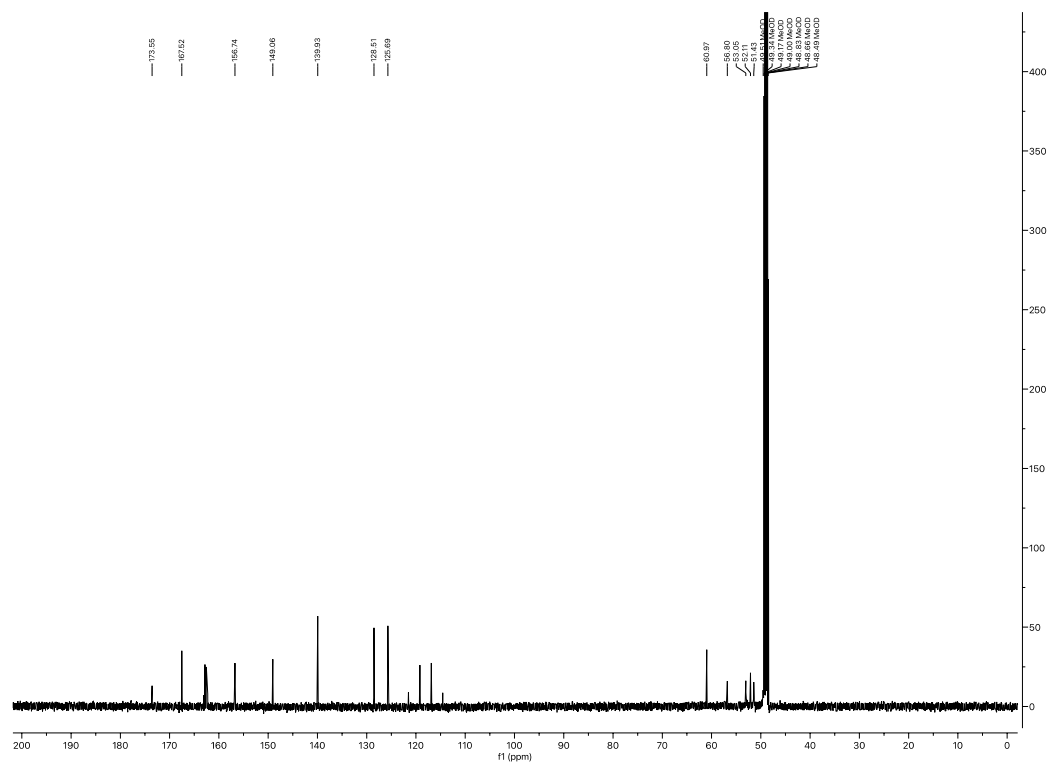

Figure S113 The  $^{13}\text{C}\{^1\text{H}\}$  NMR spectrum of  $\text{H}_3\text{L}^{102}$  in MeOD.

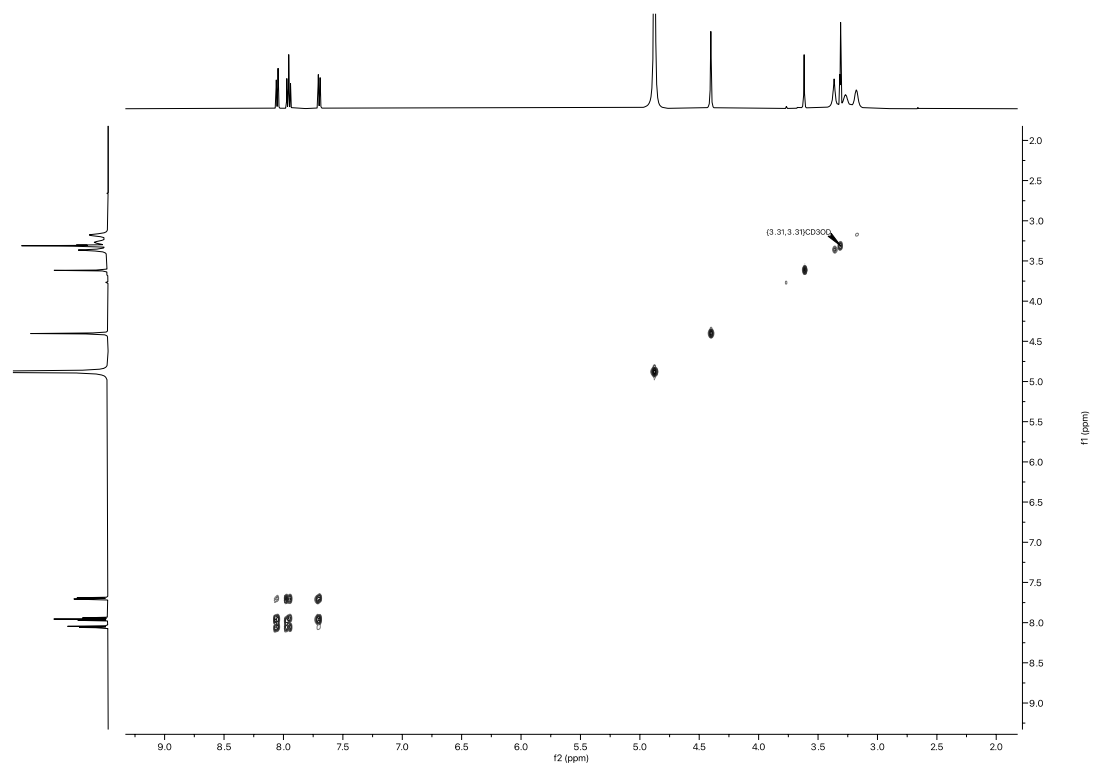

Figure S114 The  $^1\text{H}\text{-}^1\text{H}$  COSY NMR spectrum of  $\text{H}_3\text{L}^{102}$  in MeOD.



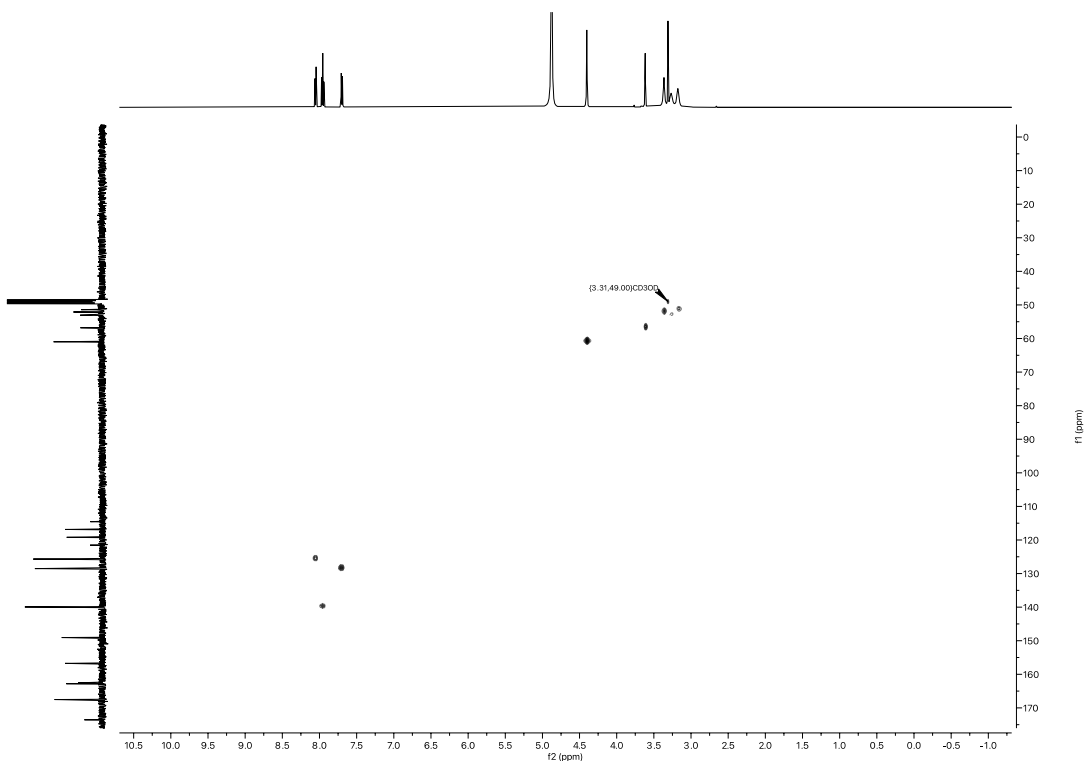

Figure S115 The  $^1\text{H}$ - $^{13}\text{C}$  HSQC NMR spectrum of  $\text{H}_3\text{L}^{102}$  in MeOD.

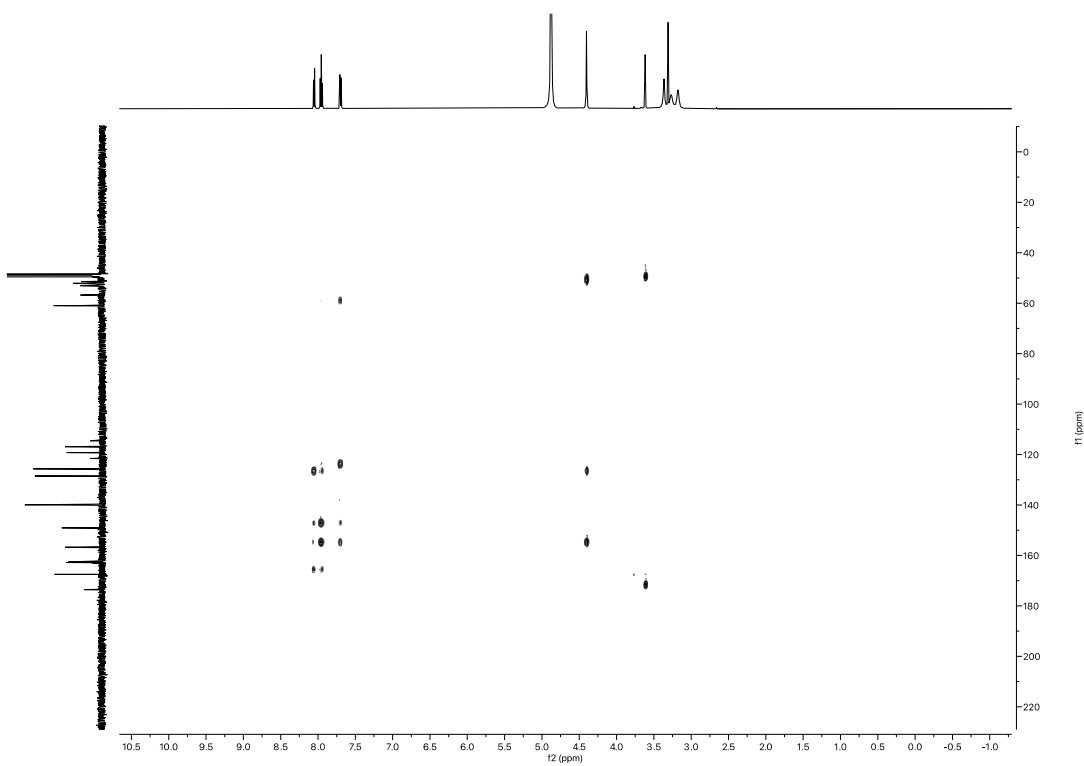

Figure S116 The  $^1\text{H}$ - $^{13}\text{C}$  HMBC NMR spectrum of  $\text{H}_3\text{L}^{102}$  in MeOD.

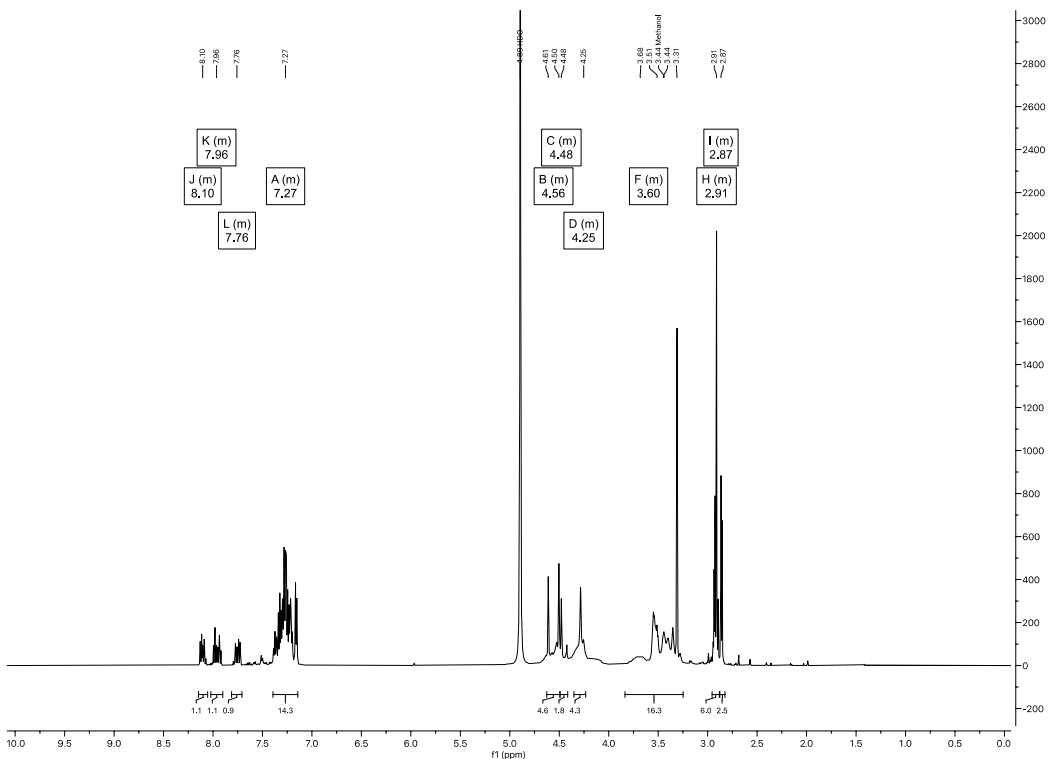

Figure S117 The  $^1\text{H}$  NMR spectrum of HL<sup>021</sup> in MeOD.

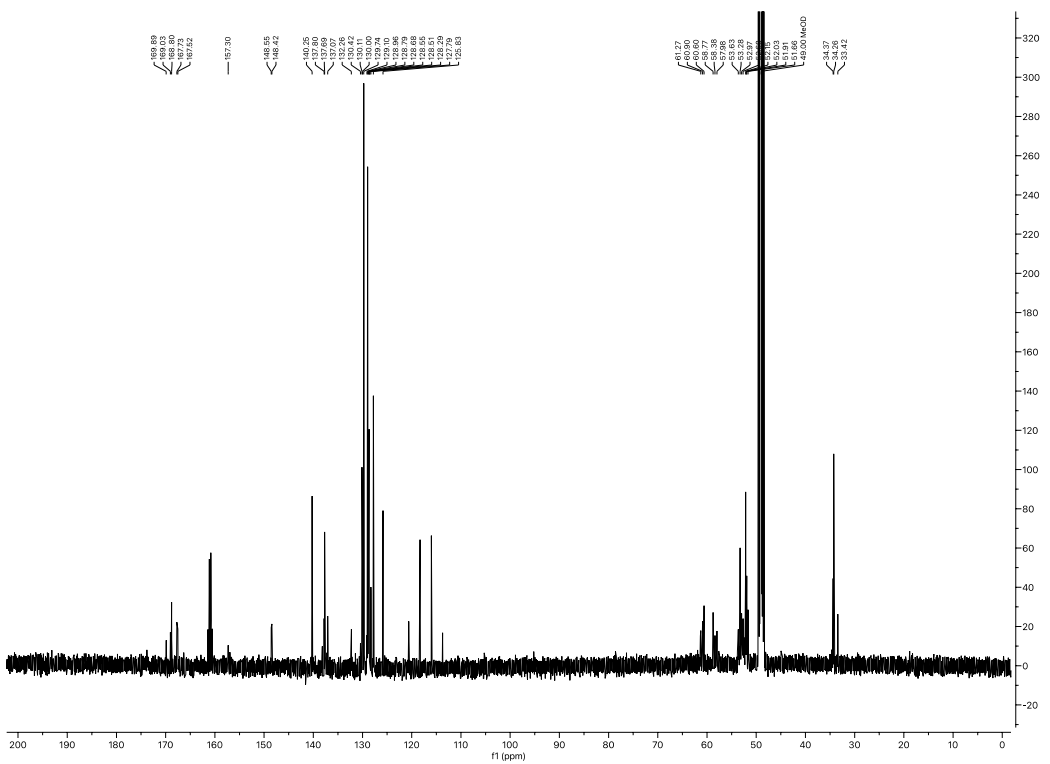

Figure S118 The  $^{13}\text{C}\{^1\text{H}\}$  NMR spectrum of HL<sup>021</sup> in MeOD.

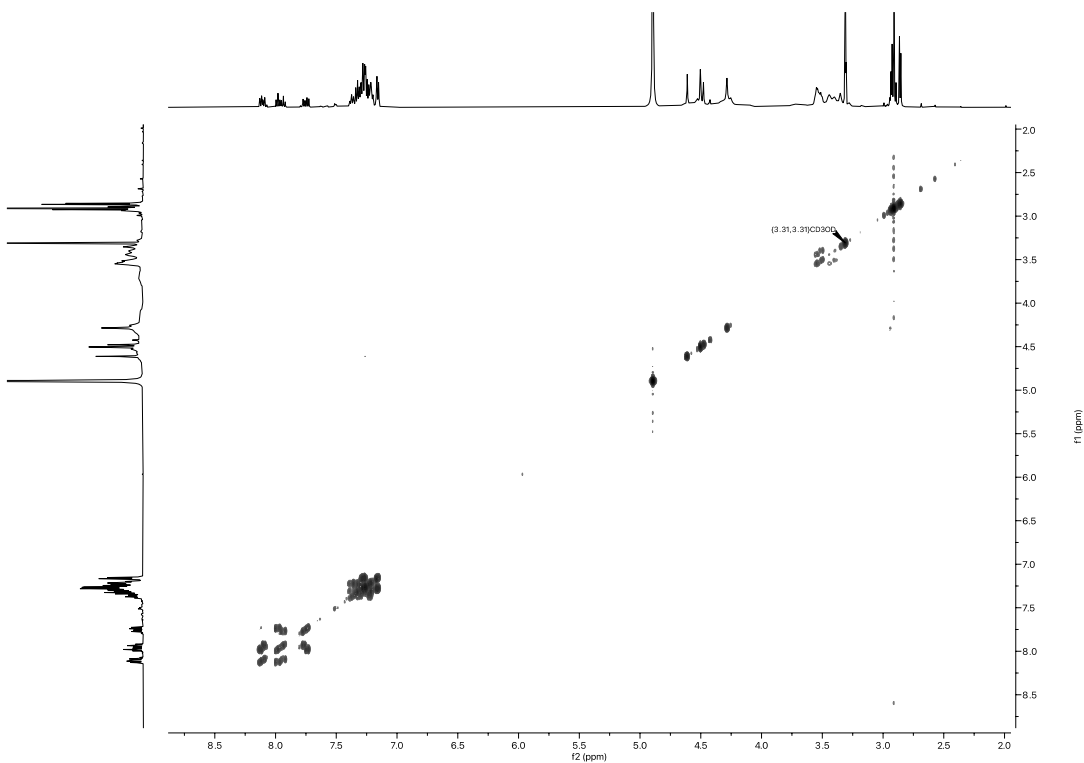

**Figure S119** The  $^1\text{H}$ - $^1\text{H}$  COSY NMR spectrum of HL<sup>021</sup> in MeOD.

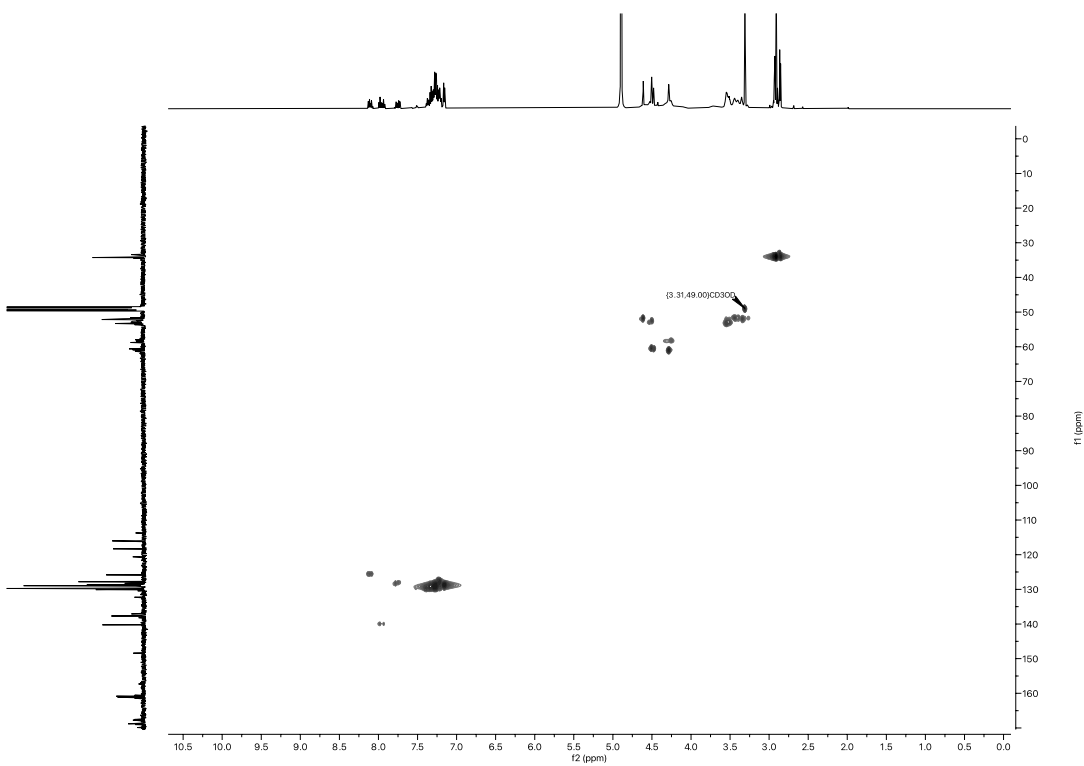

**Figure S120** The  $^1\text{H}$ - $^{13}\text{C}$  HSQC NMR spectrum of HL<sup>021</sup> in MeOD.

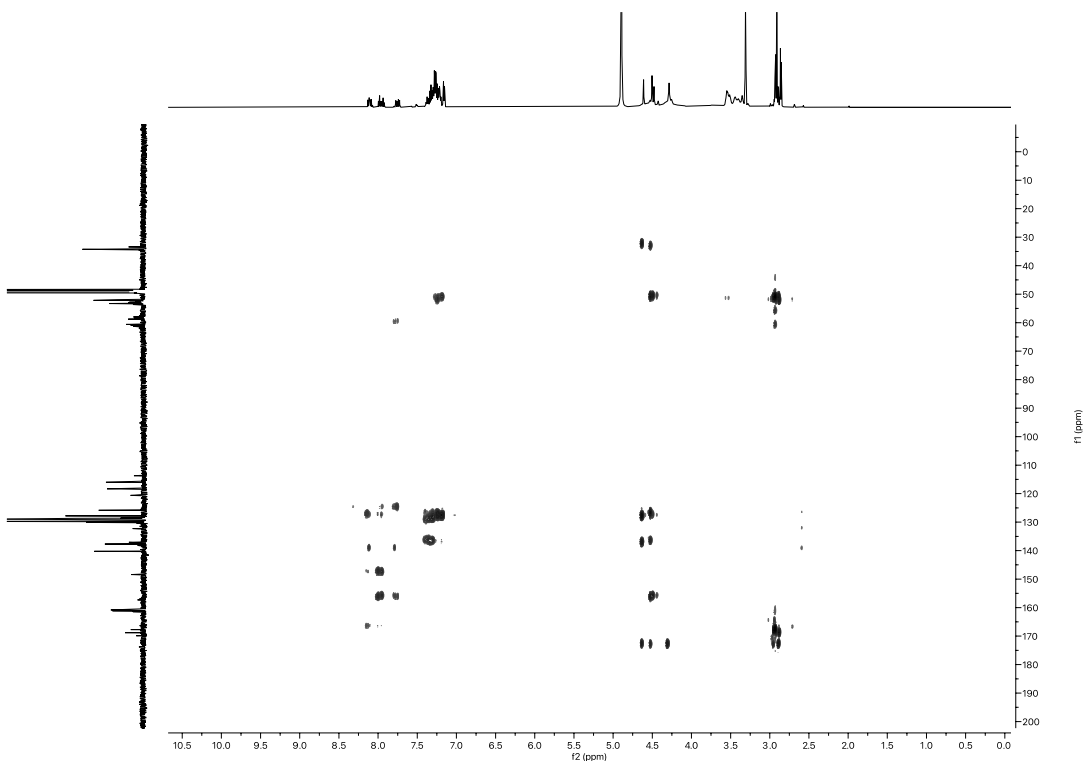

Figure S121 The  $^1\text{H}$ - $^{13}\text{C}$  HMBC NMR spectrum of HL<sup>021</sup> in MeOD.

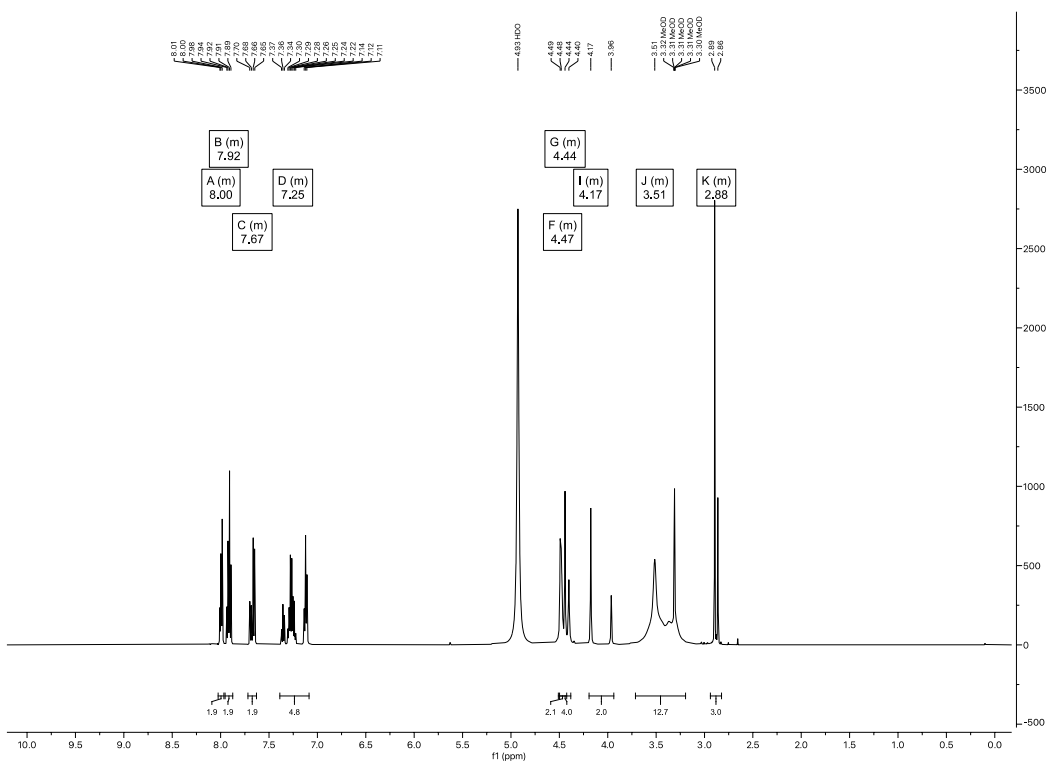

Figure S122 The  $^1\text{H}$  NMR spectrum of H<sub>2</sub>L<sup>012</sup> in MeOD.

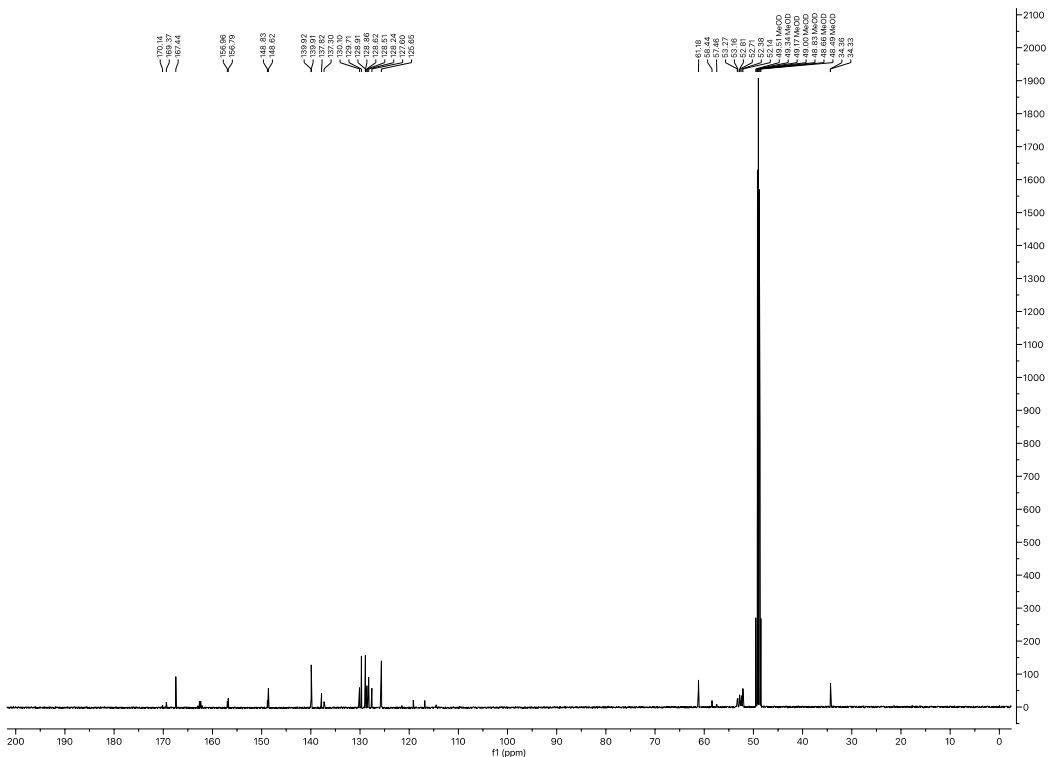

Figure S123 The  $^{13}\text{C}\{^1\text{H}\}$  NMR spectrum of  $\text{H}_2\text{L}^{012}$  in MeOD.

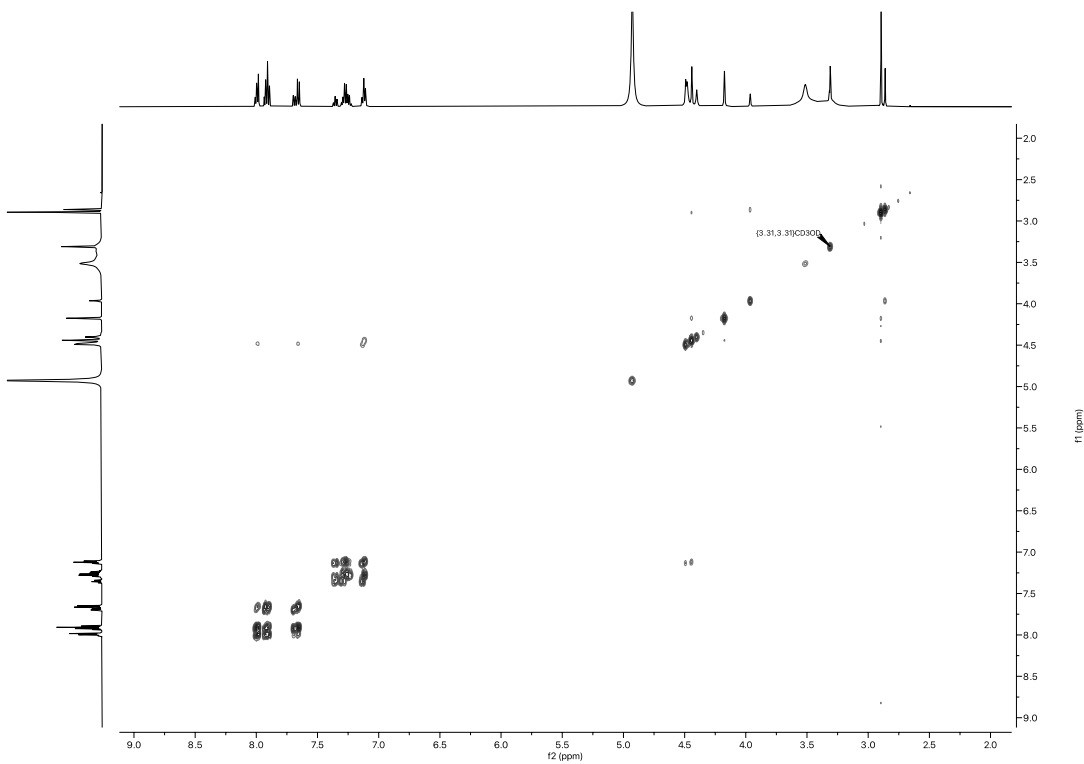

Figure S124 The  $^1\text{H}\text{-}^1\text{H}$  COSY NMR spectrum of  $\text{H}_2\text{L}^{012}$  in MeOD.

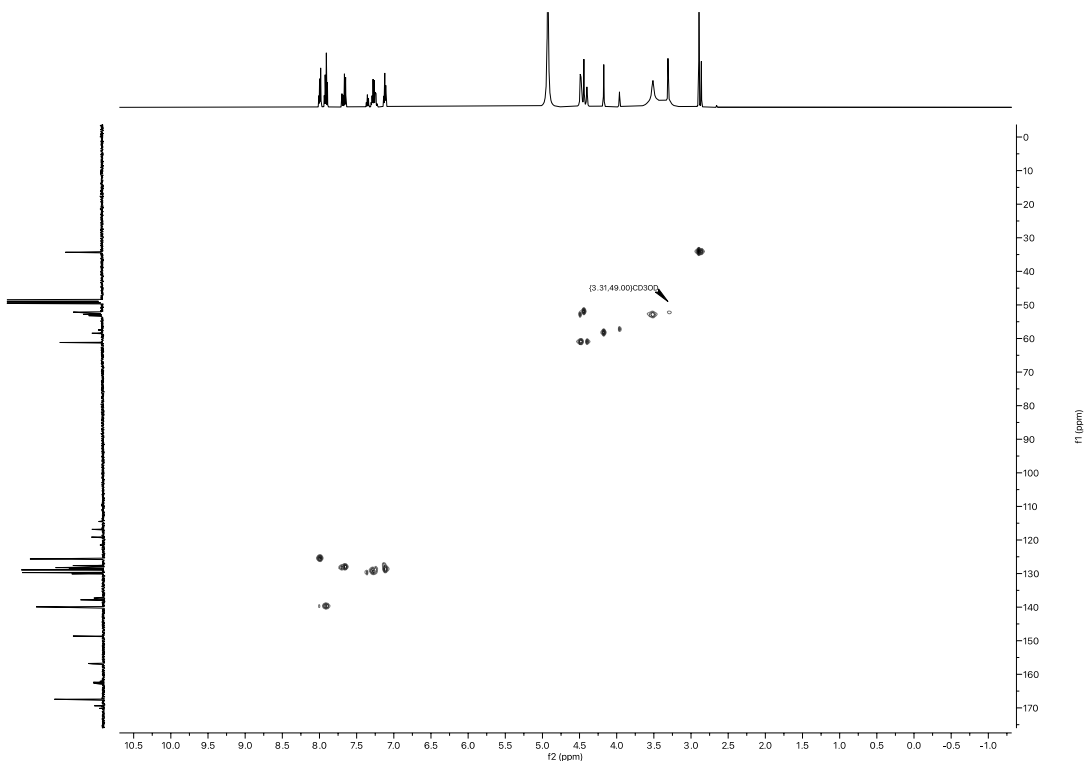

**Figure S125** The  $^1\text{H}$ - $^{13}\text{C}$  HSQC NMR spectrum of  $\text{H}_2\text{L}^{012}$  in MeOD.

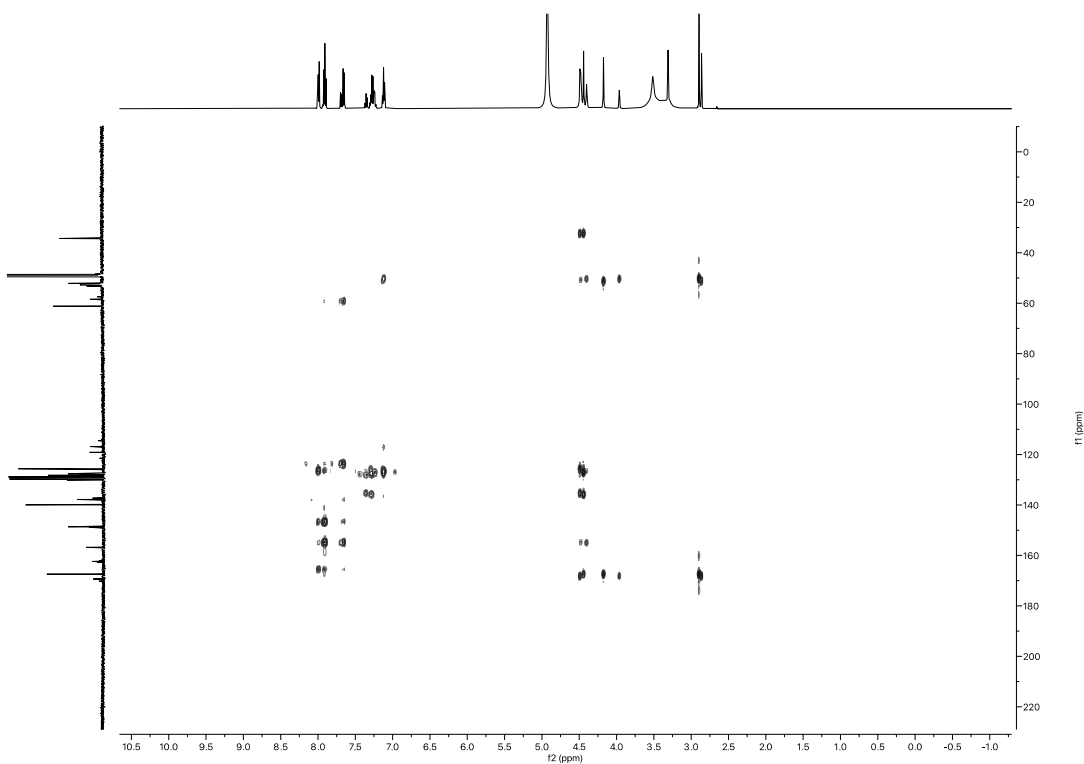

**Figure S126** The  $^1\text{H}$ - $^{13}\text{C}$  HMBC NMR spectrum of  $\text{H}_2\text{L}^{012}$  in MeOD.

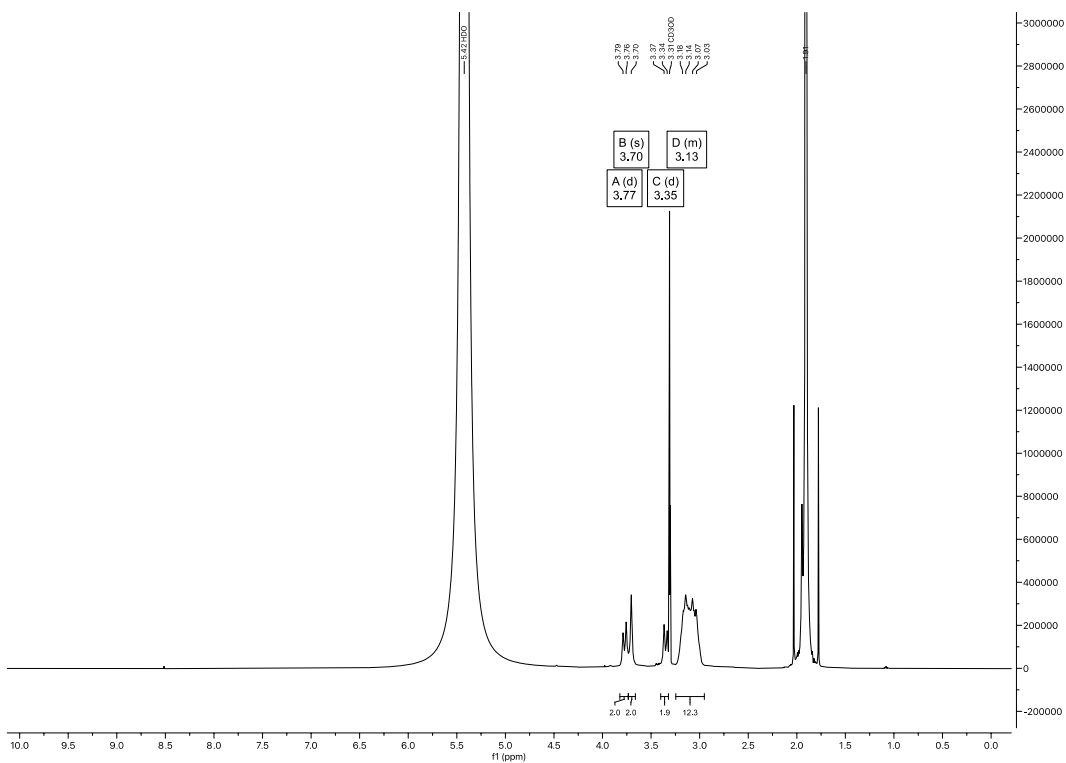

Figure S127 The  $^1\text{H}$  NMR spectrum of  $[\text{Sc}(\text{L}^{300})]$  in MeOD.

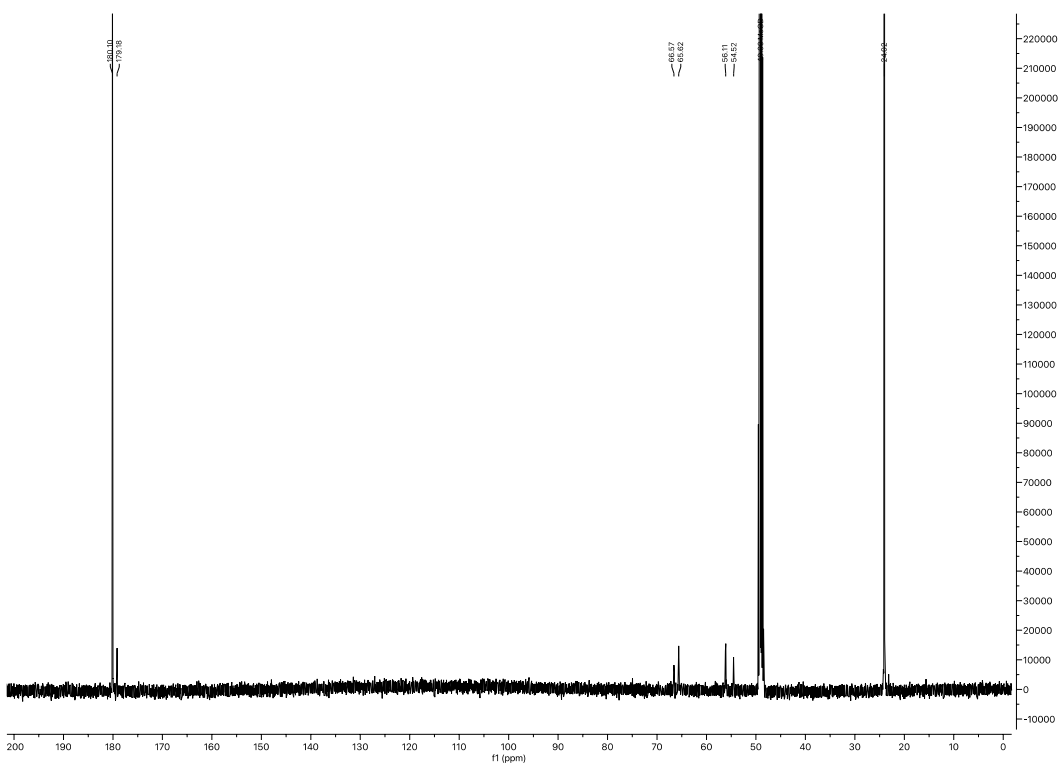

Figure S128 The  $^{13}\text{C}\{^1\text{H}\}$  NMR spectrum of  $[\text{Sc}(\text{L}^{300})]$  in MeOD.

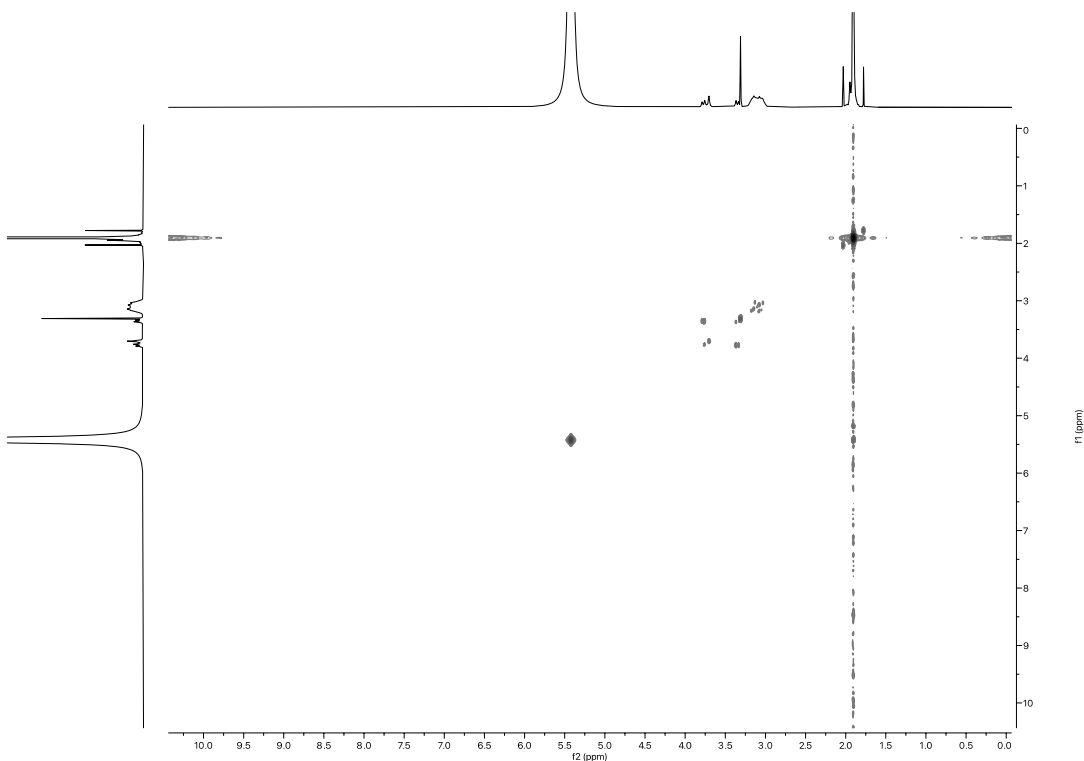

**Figure S129** The  $^1\text{H}$ - $^1\text{H}$  COSY NMR spectrum of  $[\text{Sc}(\text{L}^{300})]$  in MeOD.

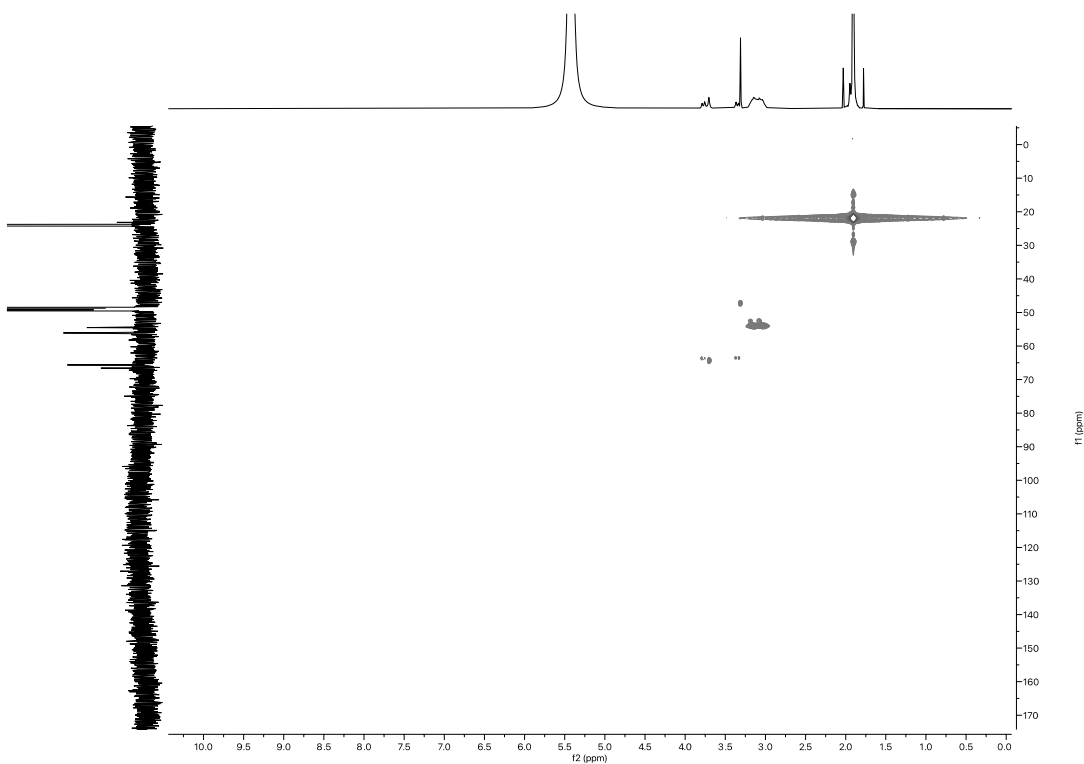

**Figure S130** The  $^1\text{H}$ - $^{13}\text{C}$  HSQC NMR spectrum of  $[\text{Sc}(\text{L}^{300})]$  in MeOD.



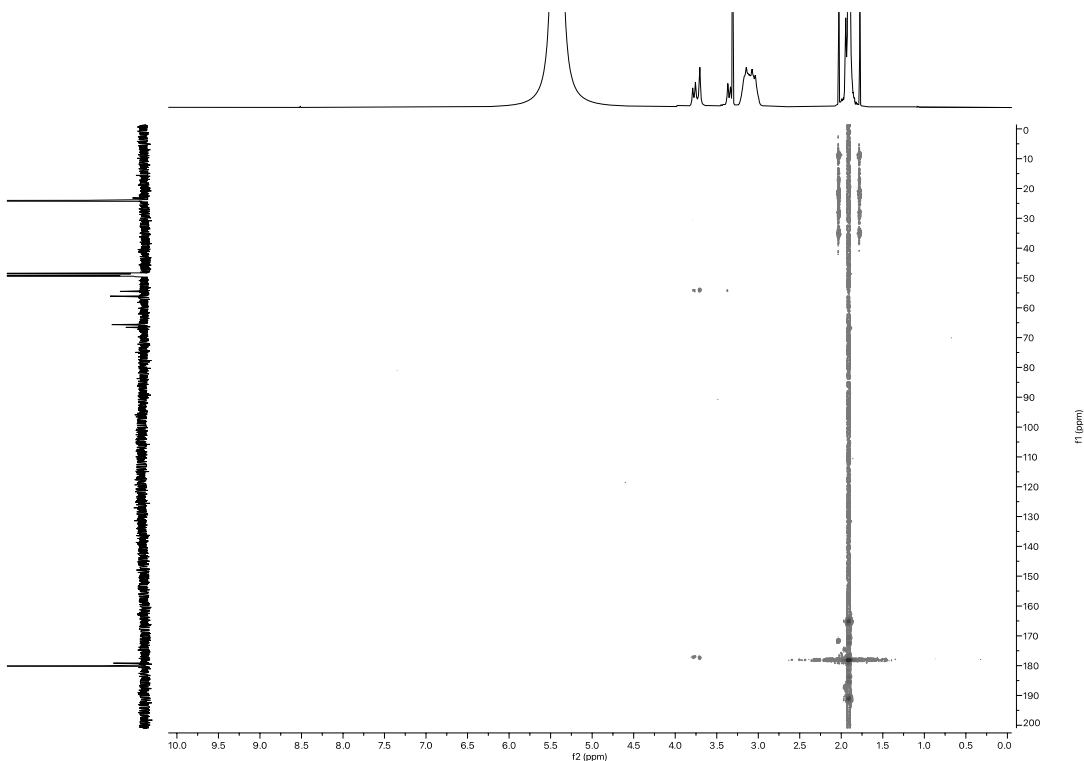

Figure S131 The  $^1\text{H}$ - $^{13}\text{C}$  HMBC NMR spectrum of  $[\text{Sc}(\text{L}^{300})]$  in MeOD.

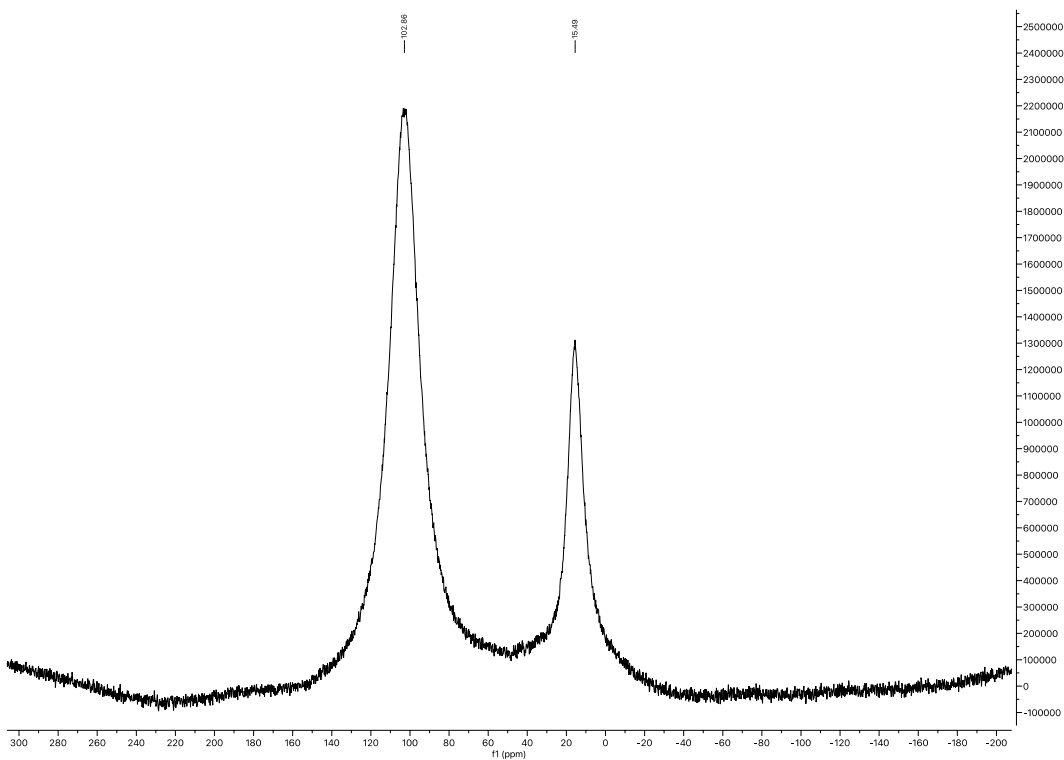

Figure S132 The  $^{45}\text{Sc}$  NMR spectrum of  $[\text{Sc}(\text{L}^{300})]$  in MeOD.

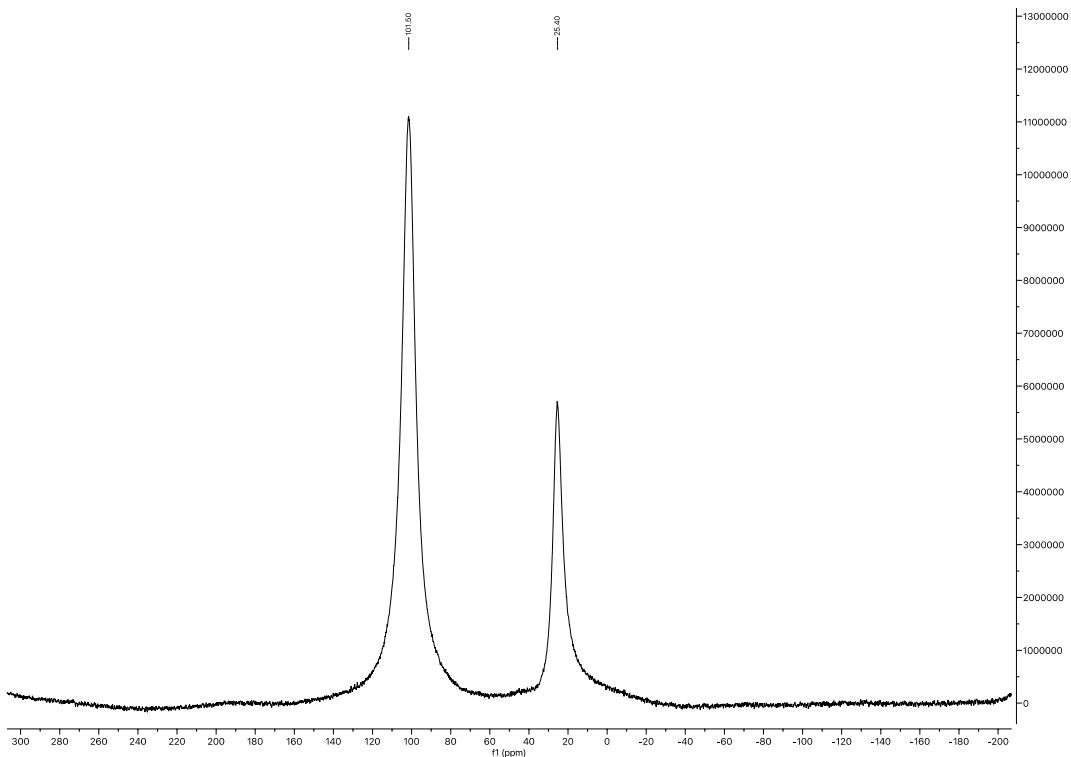

Figure S133 The  $^{45}\text{Sc}$  NMR spectrum of  $[\text{Sc}(\text{L}^{300})]$  in  $\text{D}_2\text{O}$ .

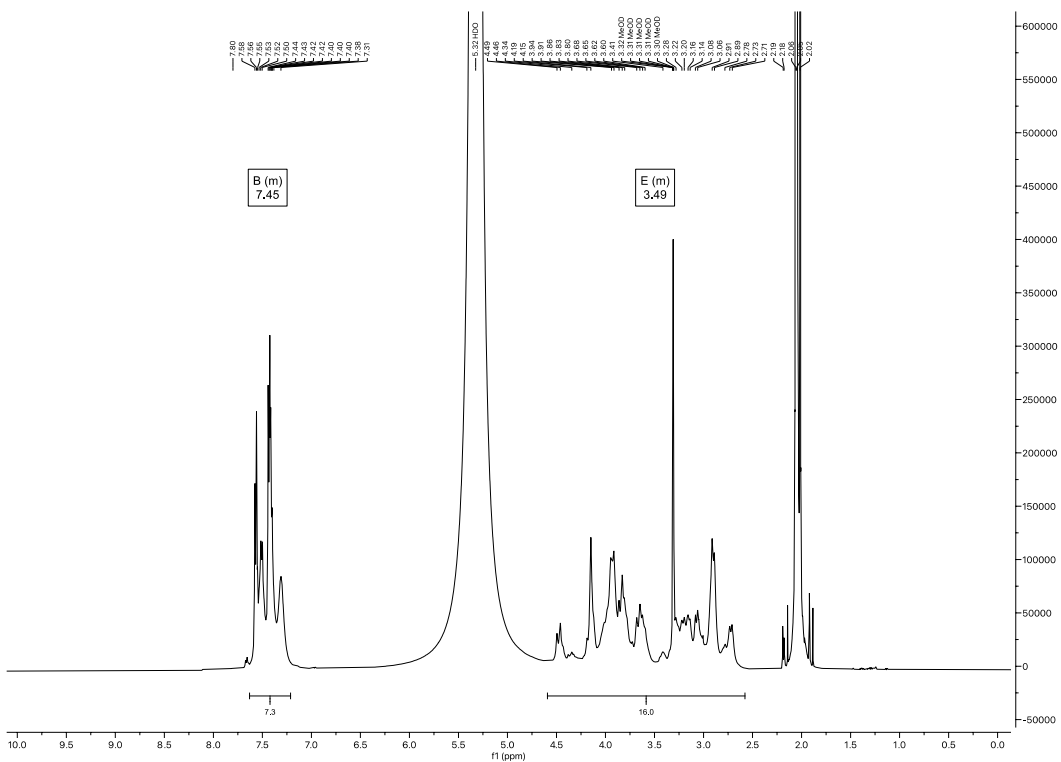

Figure S134 The  $^1\text{H}$  NMR spectrum of  $[\text{Sc}(\text{L}^{300-\text{BzNH}_2})]$  in  $\text{MeOD}$ .

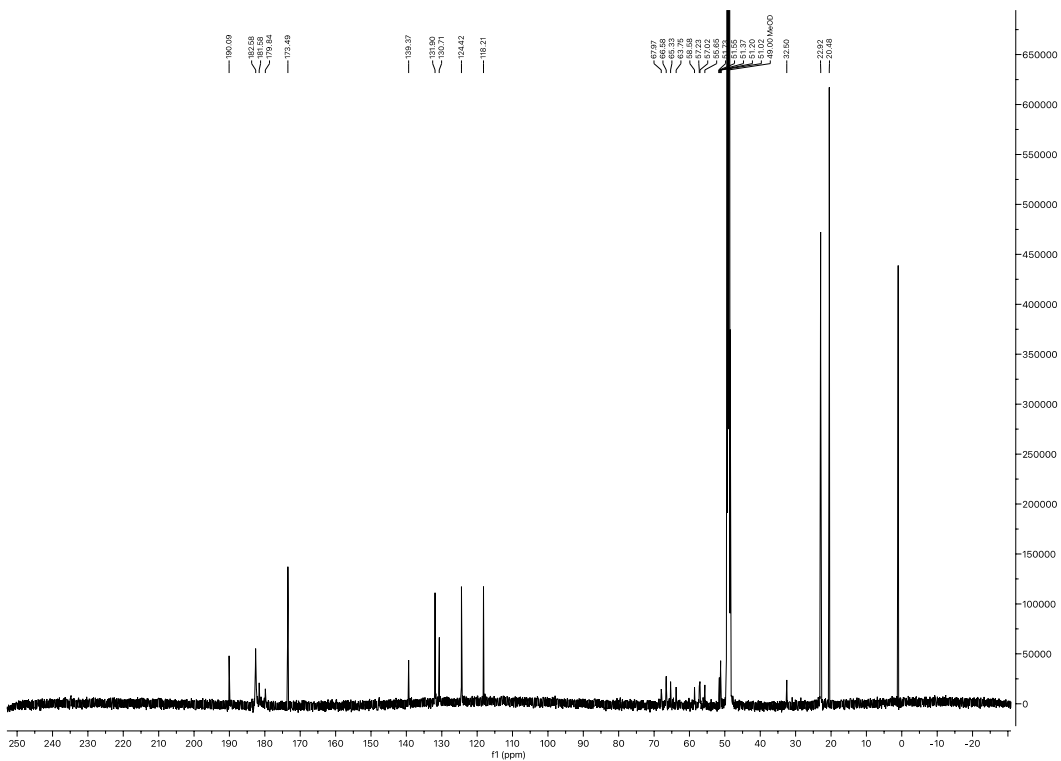

Figure S135 The  $^{13}\text{C}\{^1\text{H}\}$  NMR spectrum of  $[\text{Sc}(\text{L}^{300}\text{-BzNH}_2)]$  in MeOD.

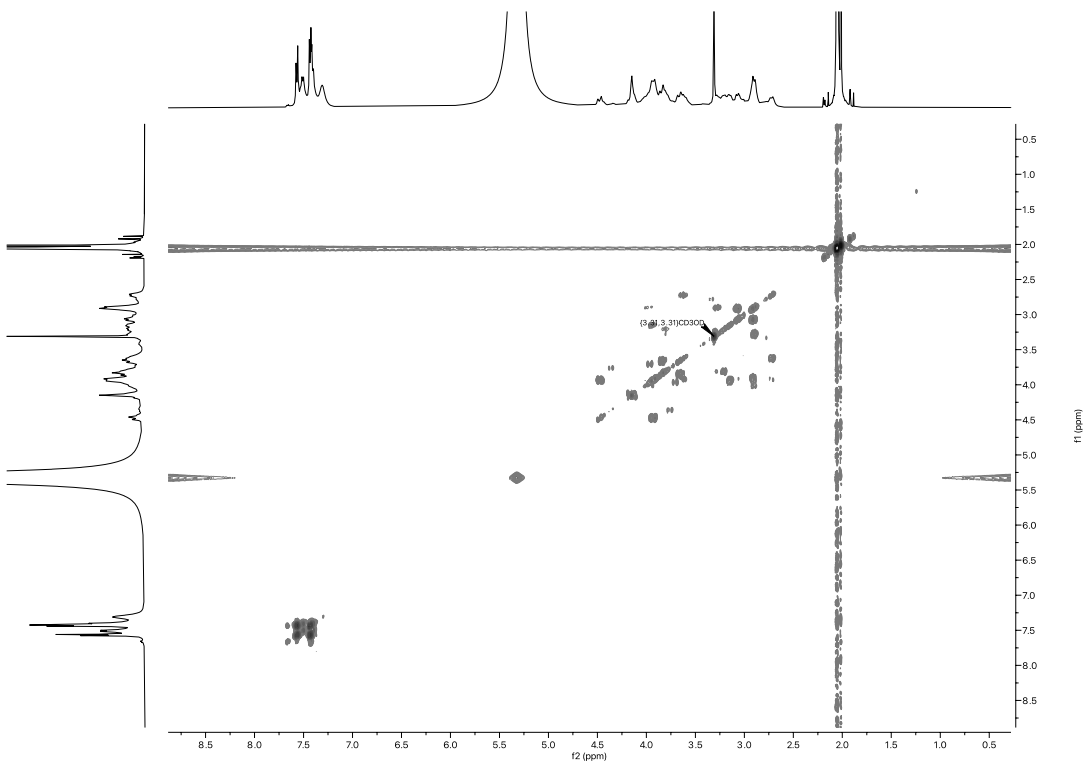

Figure S136 The  $^1\text{H}\text{-}^1\text{H}$  COSY NMR spectrum of  $[\text{Sc}(\text{L}^{300}\text{-BzNH}_2)]$  in MeOD.

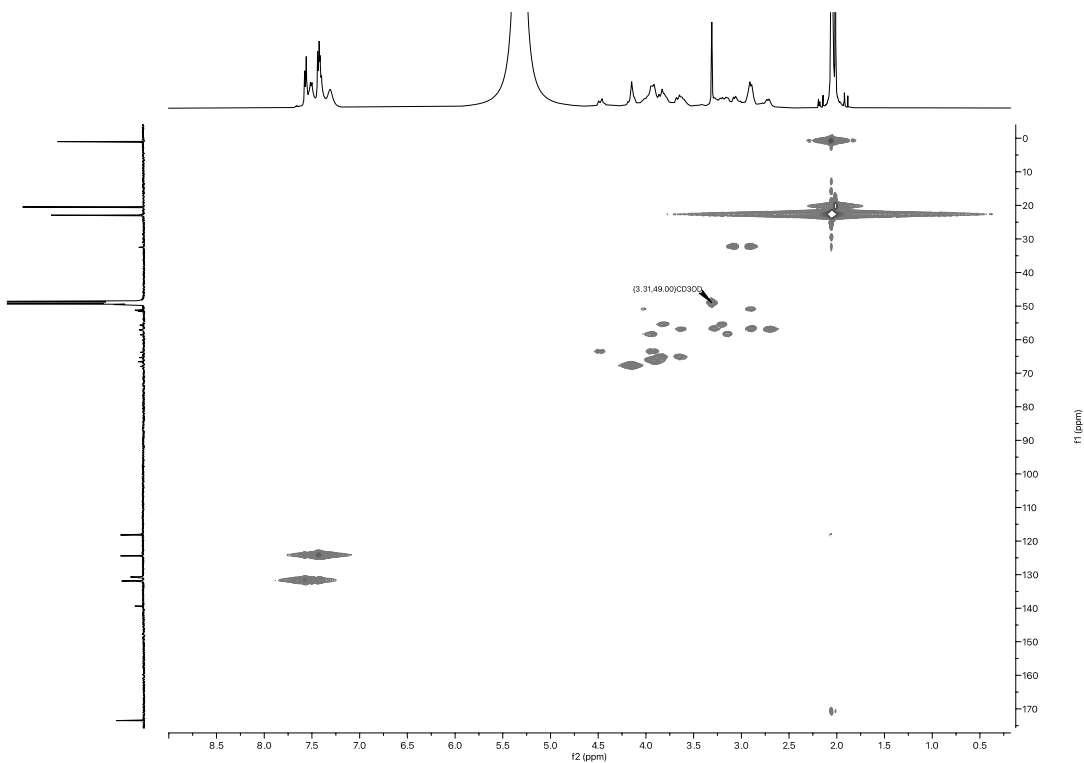

**Figure S137** The  $^1\text{H}$ - $^{13}\text{C}$  HSQC NMR spectrum of  $[\text{Sc}(\text{L}^{300}\text{-BzNH}_2)]$  in MeOD.

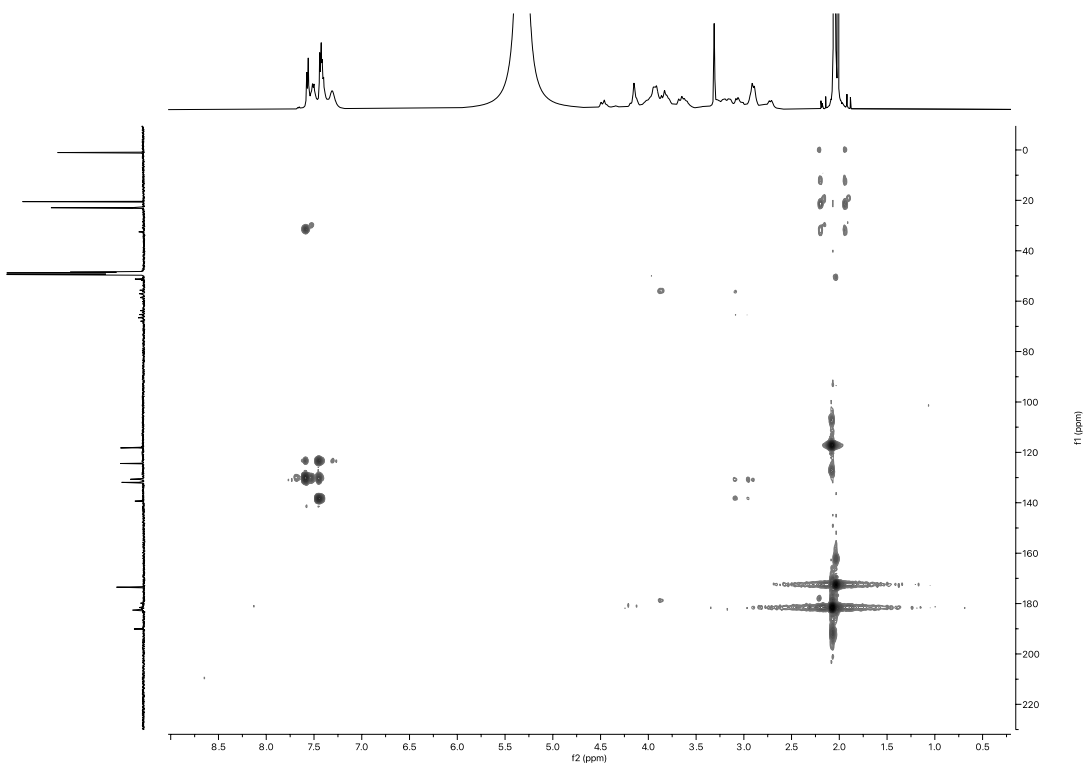

**Figure S138** The  $^1\text{H}$ - $^{13}\text{C}$  HMBC NMR spectrum of  $[\text{Sc}(\text{L}^{300}\text{-BzNH}_2)]$  in MeOD.

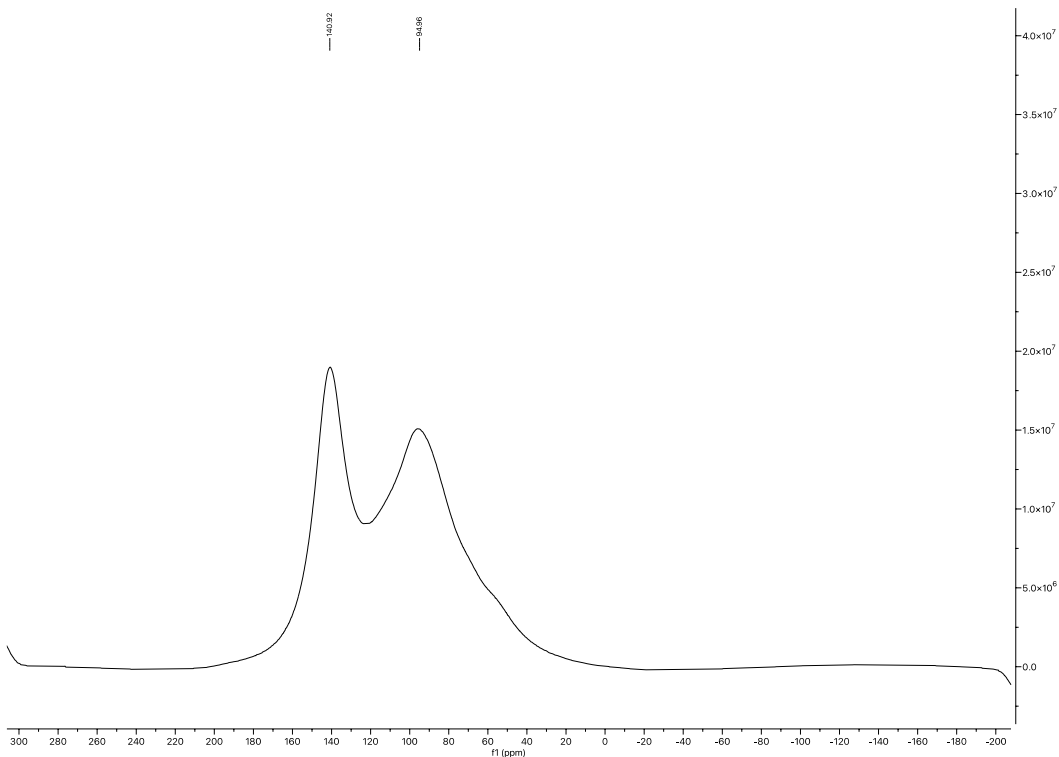

**Figure S139** The  $^{45}\text{Sc}$  NMR spectrum of  $[\text{Sc}(\text{L}^{300}\text{-BzNH}_2)]$  in MeOD.

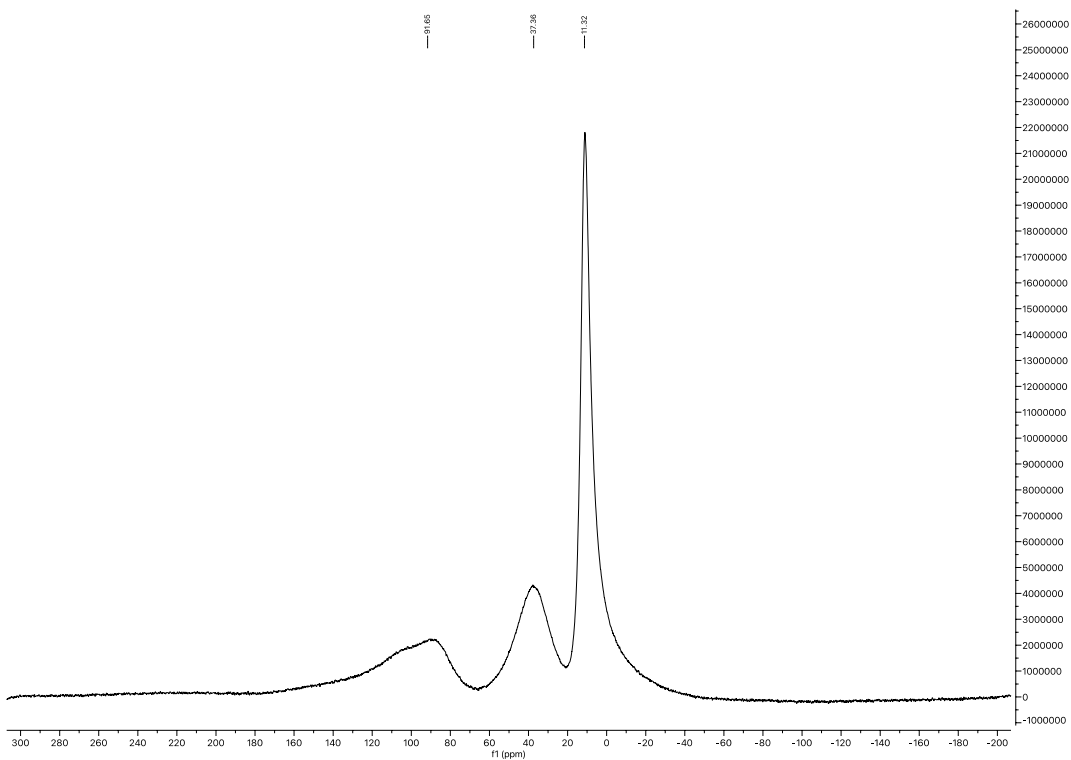

**Figure S140** The  $^{45}\text{Sc}$  NMR spectrum of  $[\text{Sc}(\text{L}^{300}\text{-BzNH}_2)]$  in  $\text{D}_2\text{O}$ .

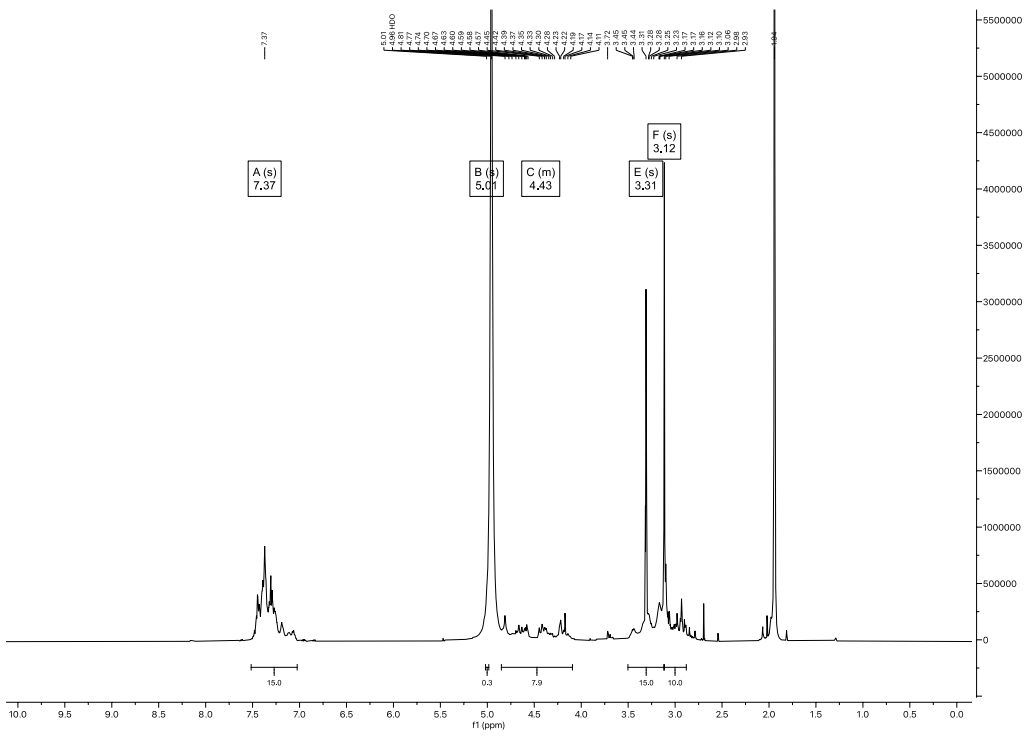

Figure S141 The  $^1\text{H}$  NMR spectrum of  $[\text{Sc}(\text{L}^{030})]^{3+}$  in MeOD.

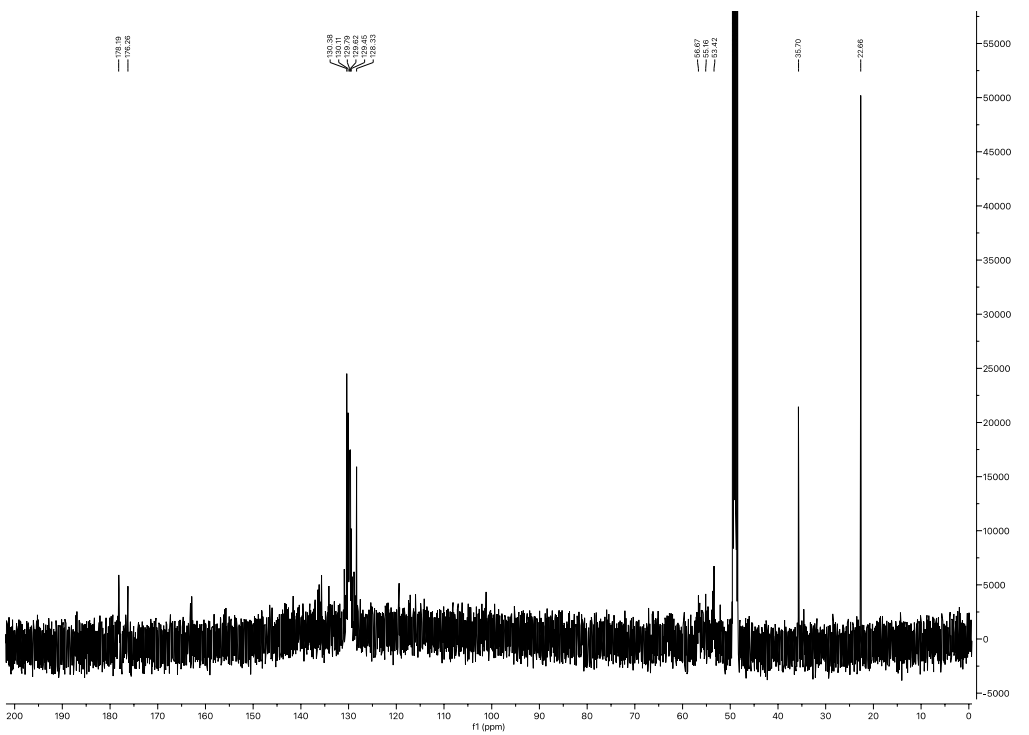

Figure S142 The  $^{13}\text{C}\{^1\text{H}\}$  NMR spectrum of  $[\text{Sc}(\text{L}^{030})]^{3+}$  in MeOD.

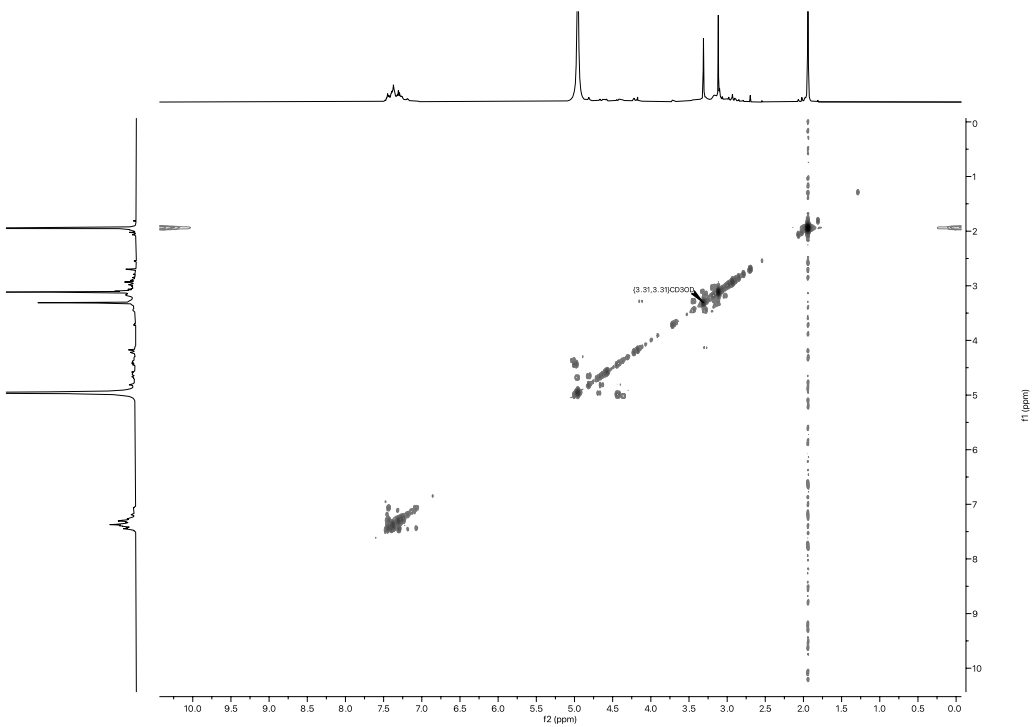

Figure S143 The  $^1\text{H}$ - $^1\text{H}$  COSY NMR spectrum of  $[\text{Sc}(\text{L}^{030})]^{3+}$  in MeOD.

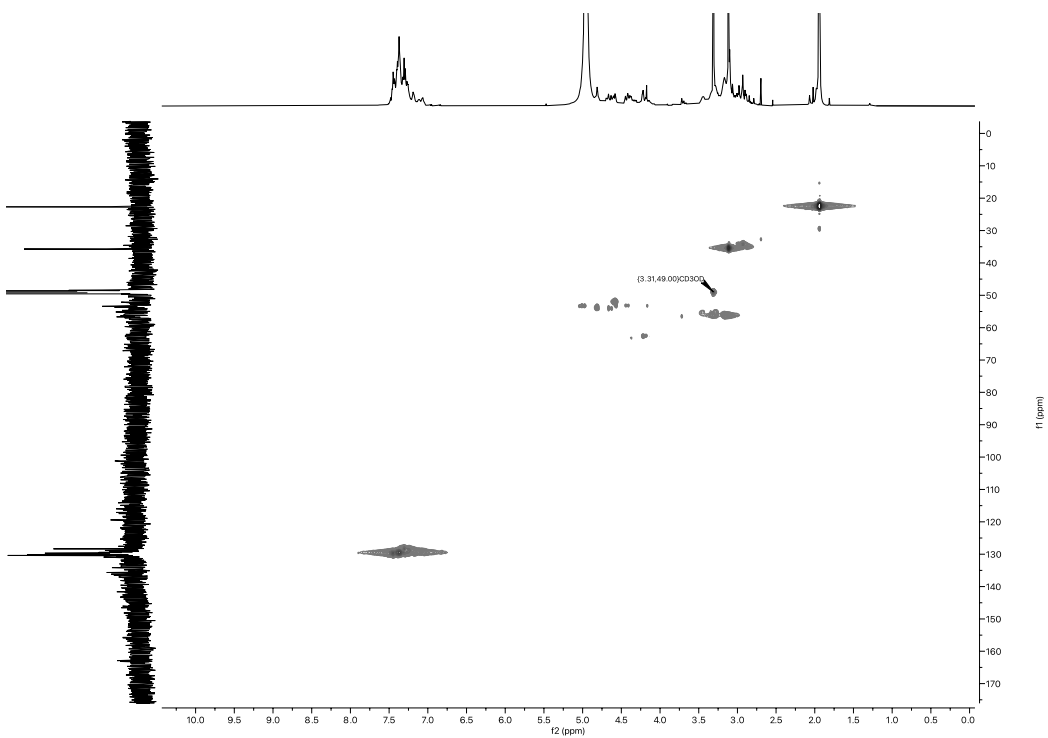

Figure S144 The  $^1\text{H}$ - $^{13}\text{C}$  HSQC NMR spectrum of  $[\text{Sc}(\text{L}^{030})]^{3+}$  in MeOD.

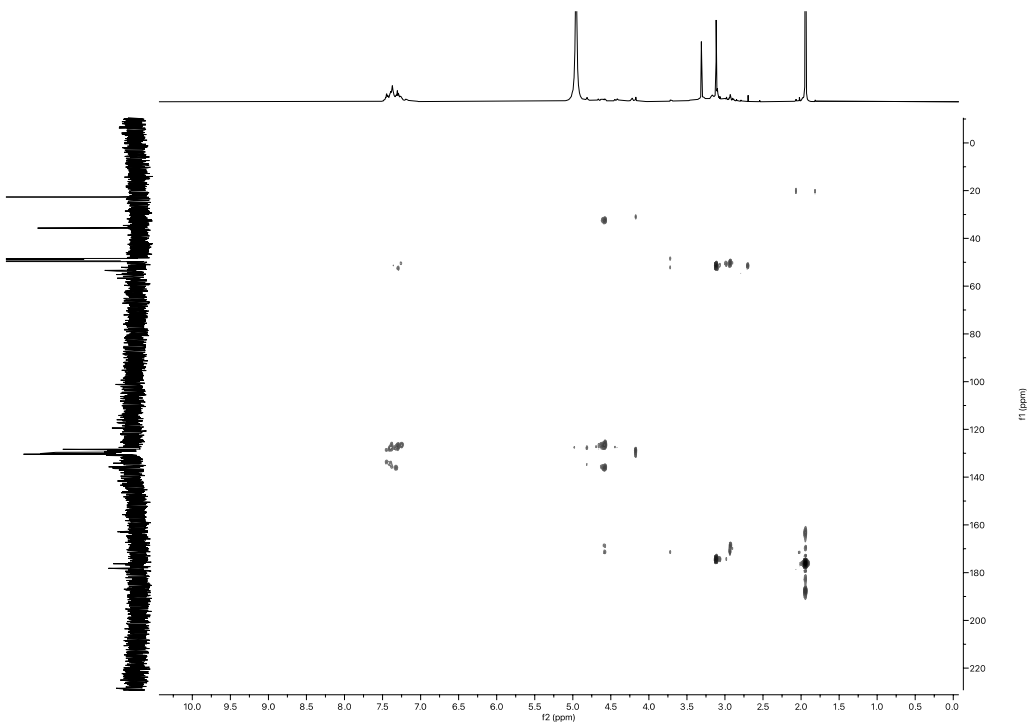

Figure S145 The  $^1\text{H}$ - $^{13}\text{C}$  HMBC NMR spectrum of  $[\text{Sc}(\text{L}^{030})]^{3+}$  in MeOD.

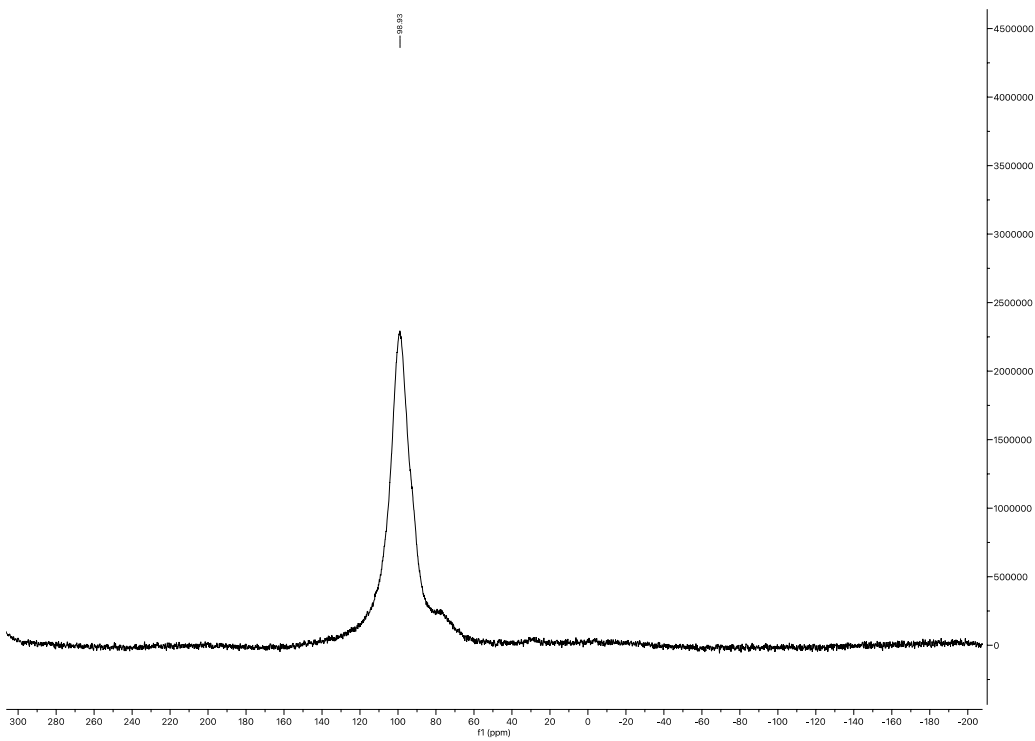

Figure S146 The  $^{45}\text{Sc}$  NMR spectrum of  $[\text{Sc}(\text{L}^{030})]^{3+}$  in MeOD.



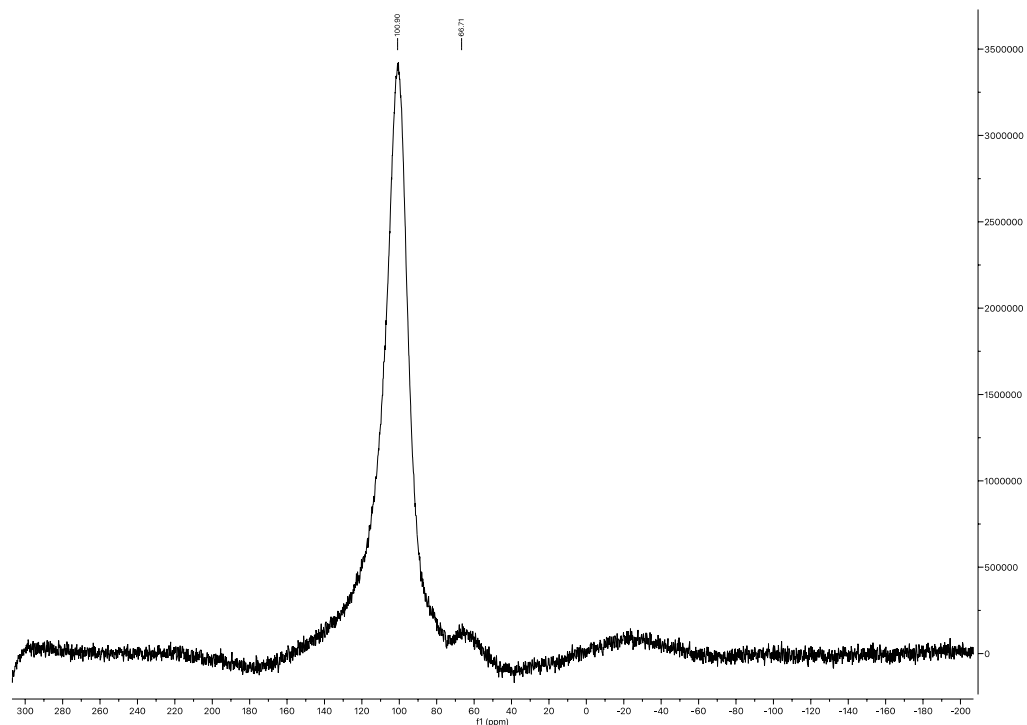

Figure S147 The  $^{45}\text{Sc}$  NMR spectrum of  $[\text{Sc}(\text{L}^{030})]^{3+}$  in  $\text{D}_2\text{O}$ .

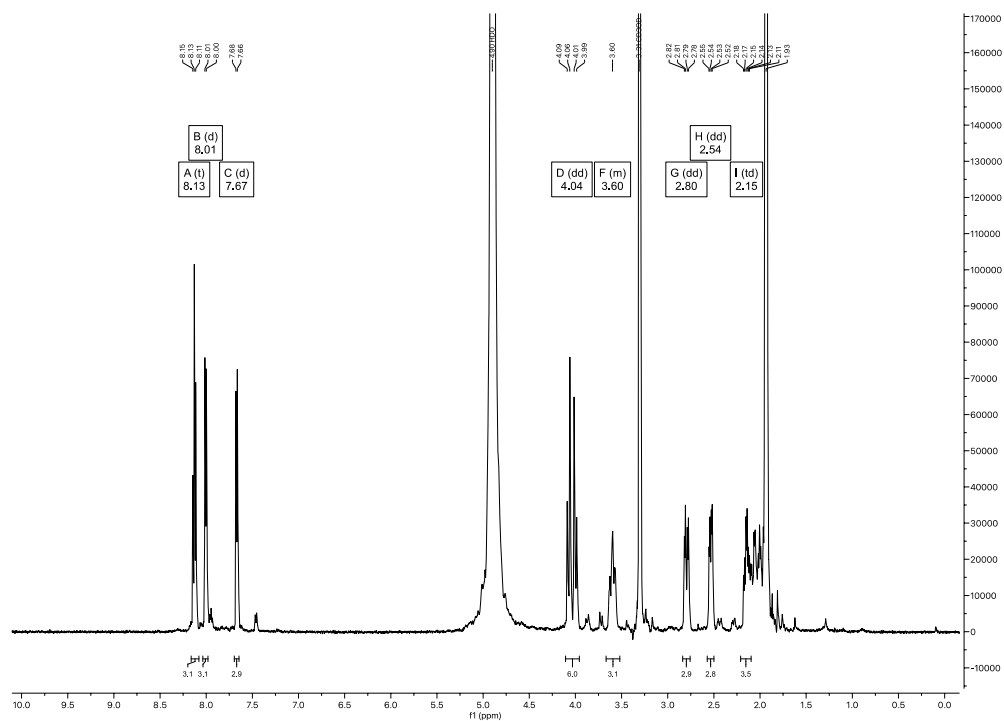

Figure S148 The  $^1\text{H}$  NMR spectrum of  $[\text{Sc}(\text{L}^{003})]$  in MeOD.

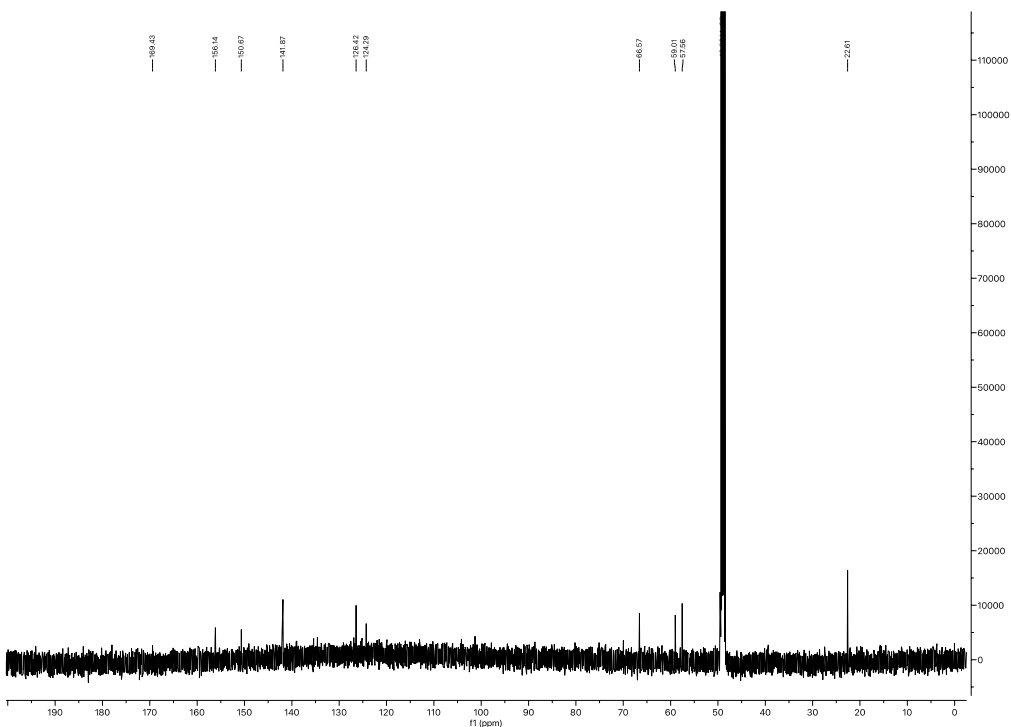

Figure S149 The  $^{13}\text{C}\{^1\text{H}\}$  NMR spectrum of  $[\text{Sc}(\text{L}^{003})]$  in MeOD.

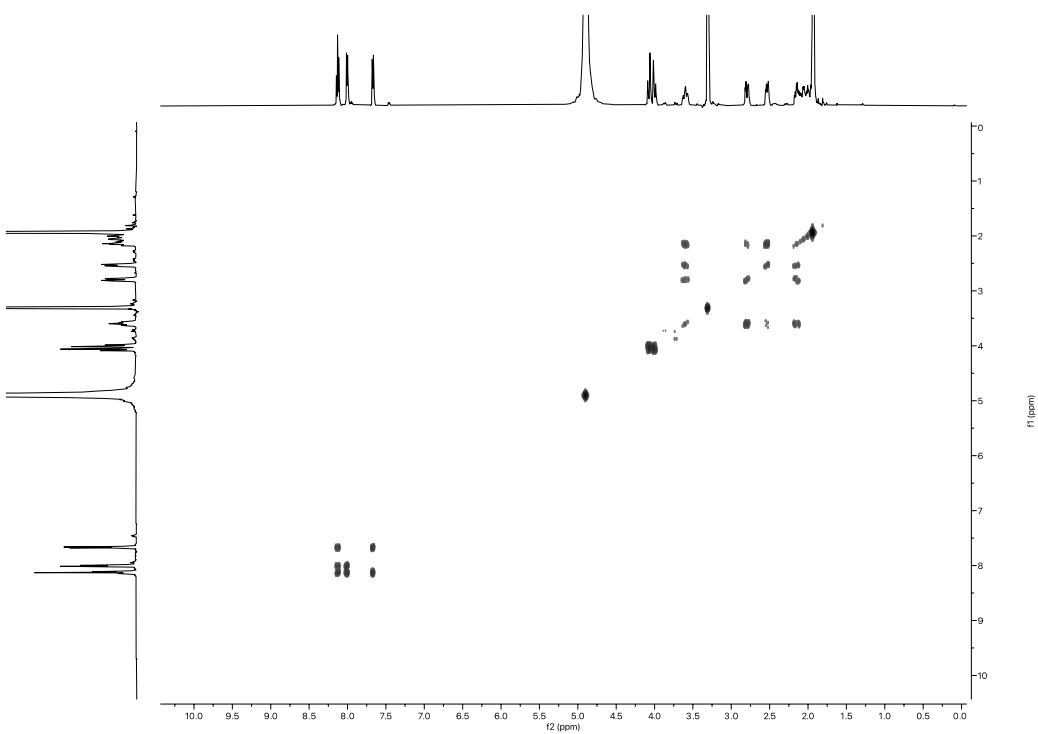

Figure S150 The  $^1\text{H}$ - $^1\text{H}$  COSY NMR spectrum of  $[\text{Sc}(\text{L}^{003})]$  in MeOD.

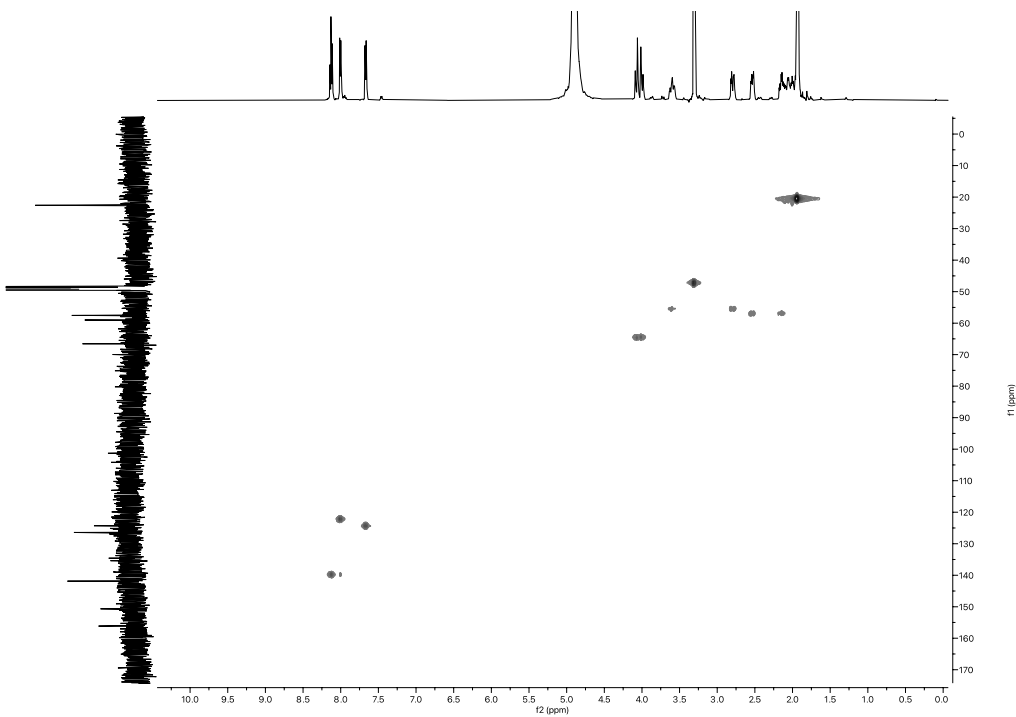

Figure S151 The  $^1\text{H}$ - $^{13}\text{C}$  HSQC NMR spectrum of  $[\text{Sc}(\text{L}^{003})]$  in MeOD.

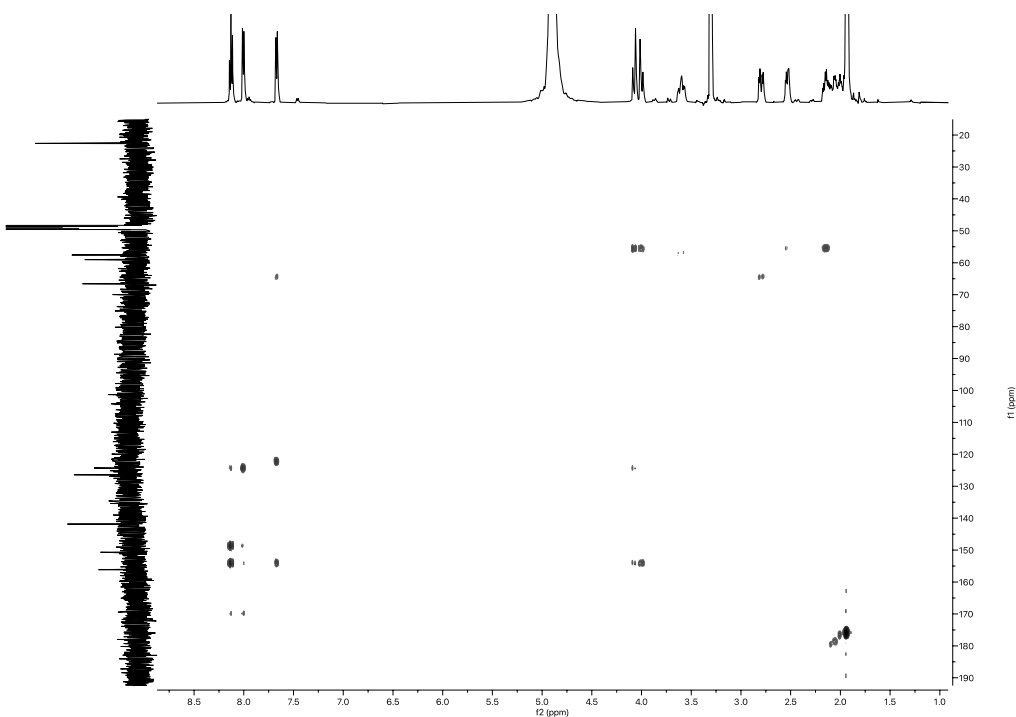

Figure S152 The  $^1\text{H}$ - $^{13}\text{C}$  HMBC NMR spectrum of  $[\text{Sc}(\text{L}^{003})]$  in MeOD.

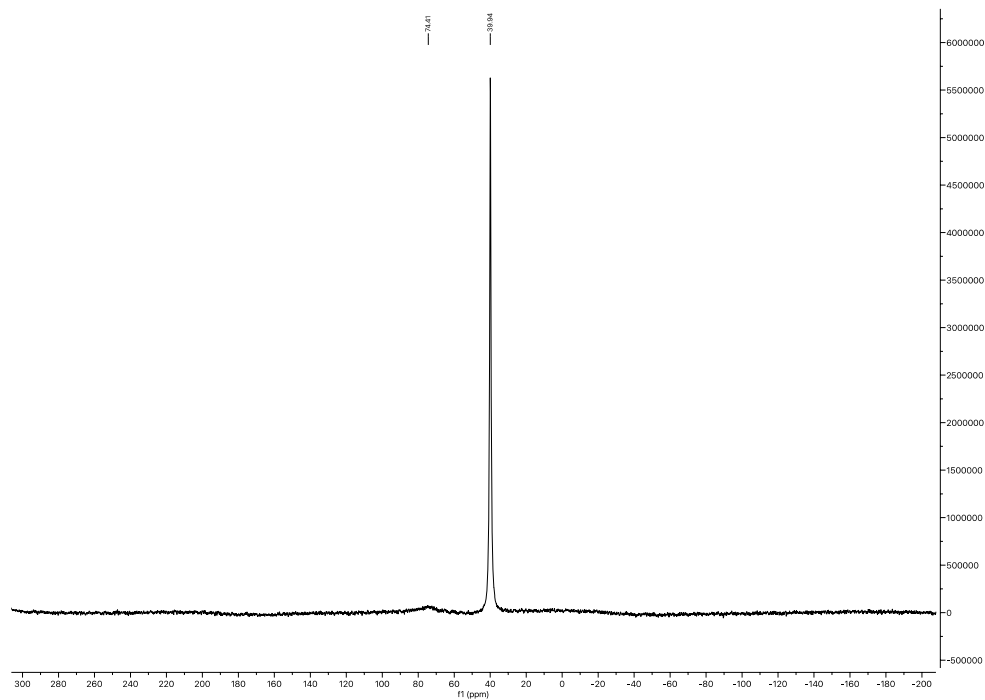

**Figure S153** The  $^{45}\text{Sc}$  NMR spectrum of  $[\text{Sc}(\text{L}^{003})]$  in MeOD.

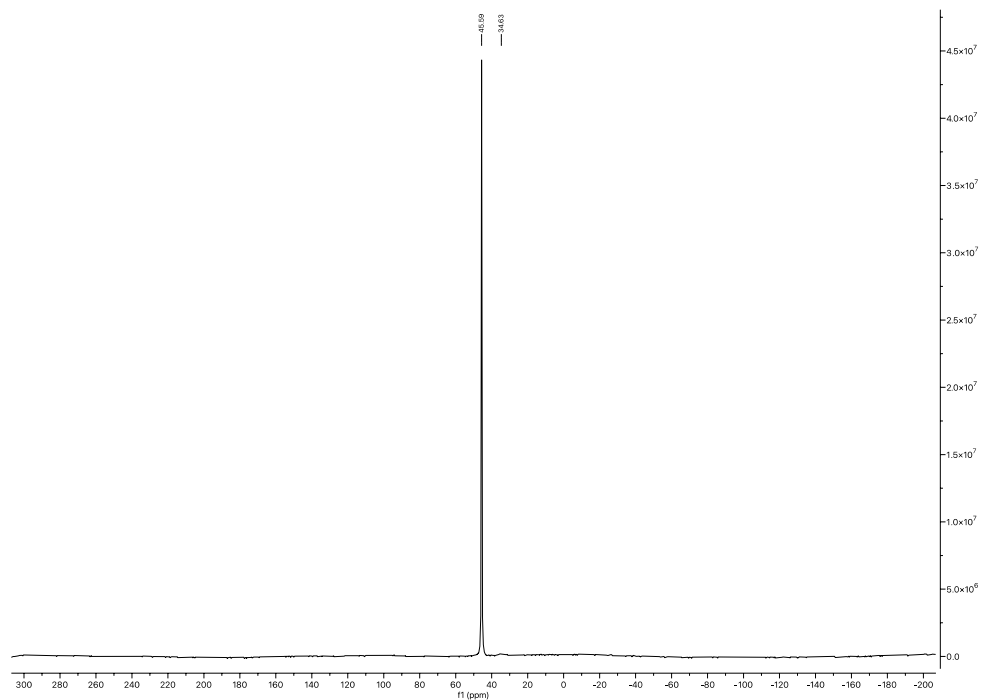

**Figure S154** The  $^{45}\text{Sc}$  NMR spectrum of  $[\text{Sc}(\text{L}^{003})]$  in  $\text{D}_2\text{O}$ .

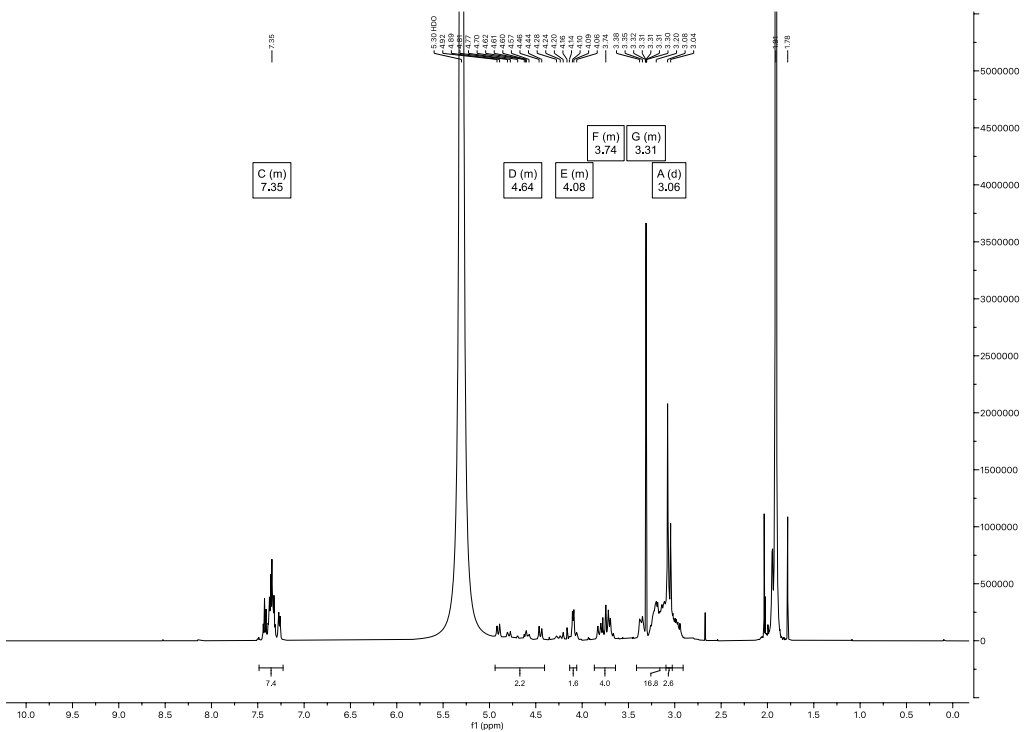

Figure S155 The  $^1\text{H}$  NMR spectrum of  $[\text{Sc}(\text{L}^{210})]^+$  in MeOD.

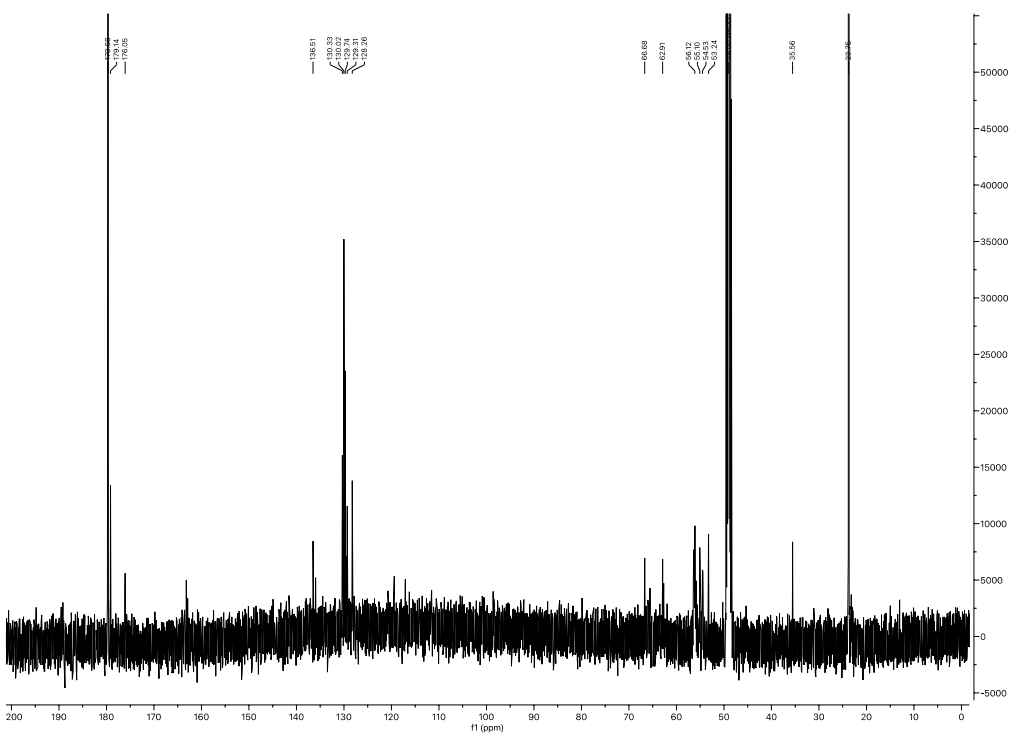

Figure S156 The  $^{13}\text{C}\{^1\text{H}\}$  NMR spectrum of  $[\text{Sc}(\text{L}^{210})]^+$  in MeOD.

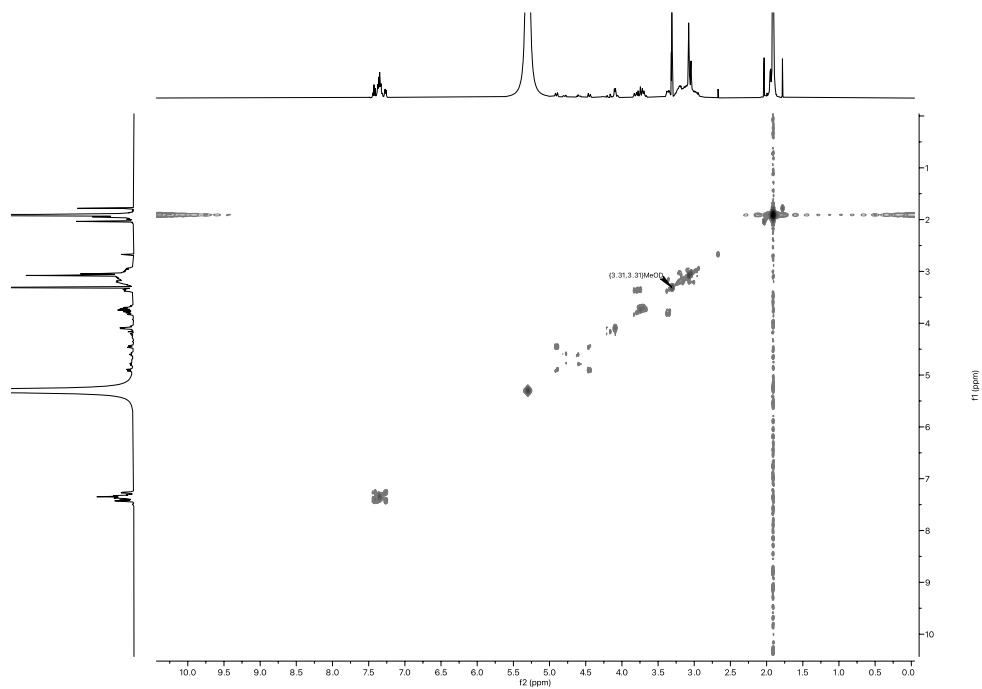

Figure S157 The  $^1\text{H}$ - $^1\text{H}$  COSY NMR spectrum of  $[\text{Sc}(\text{L}^{210})]^+$  in MeOD.

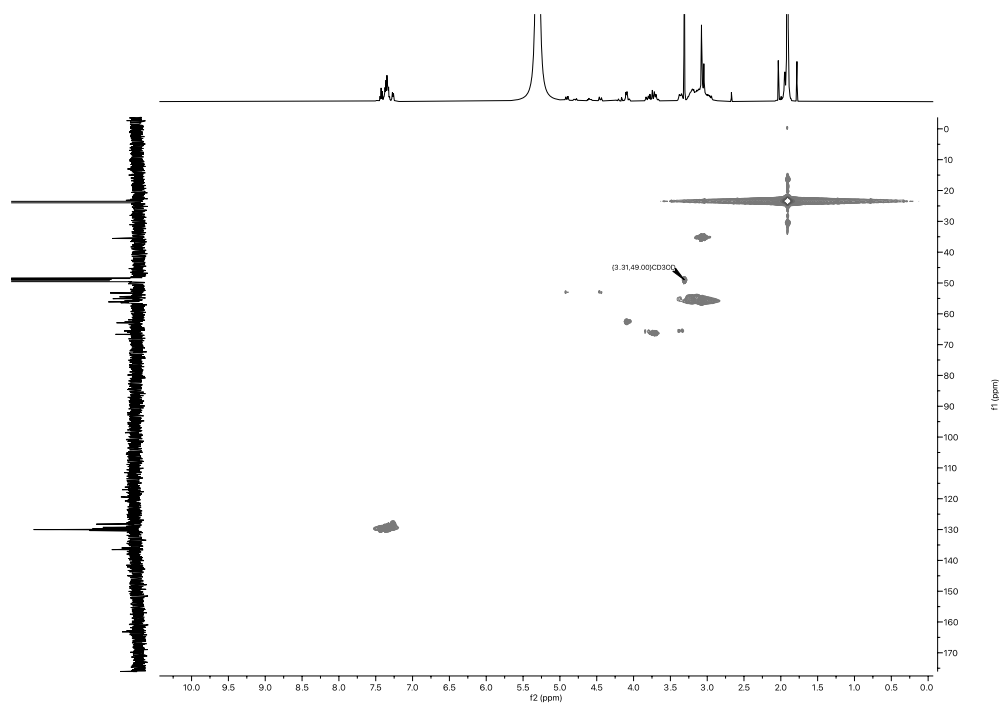

Figure S158 The  $^1\text{H}$ - $^{13}\text{C}$  HSQC NMR spectrum of  $[\text{Sc}(\text{L}^{210})]^+$  in MeOD.

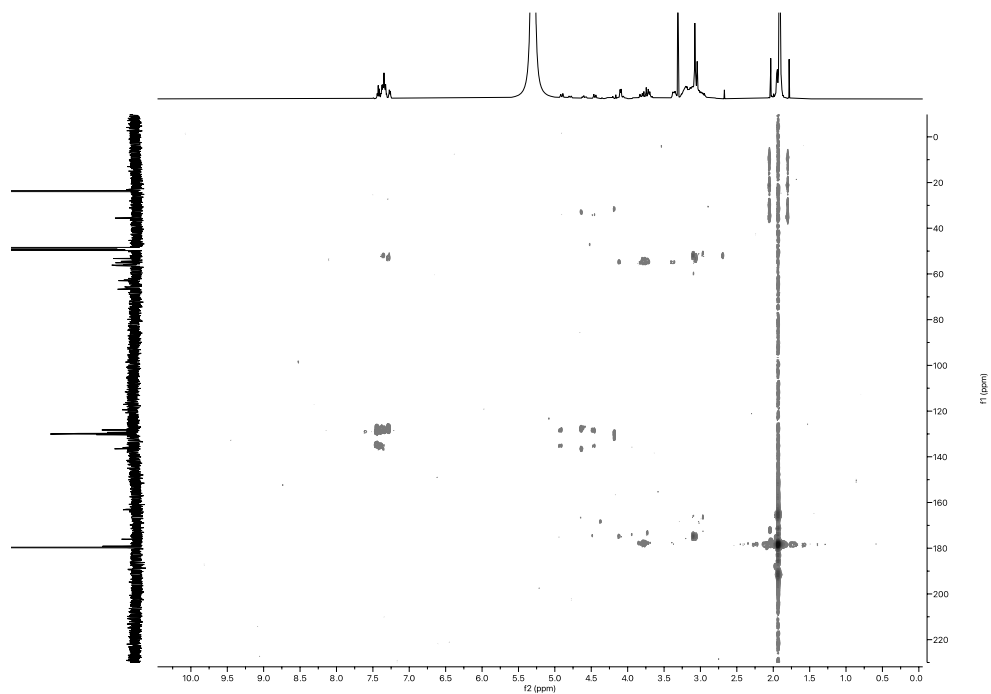

**Figure S159** The  $^1\text{H}$ - $^{13}\text{C}$  HMBC NMR spectrum of  $[\text{Sc}(\text{L}^{210})]^+$  in MeOD.

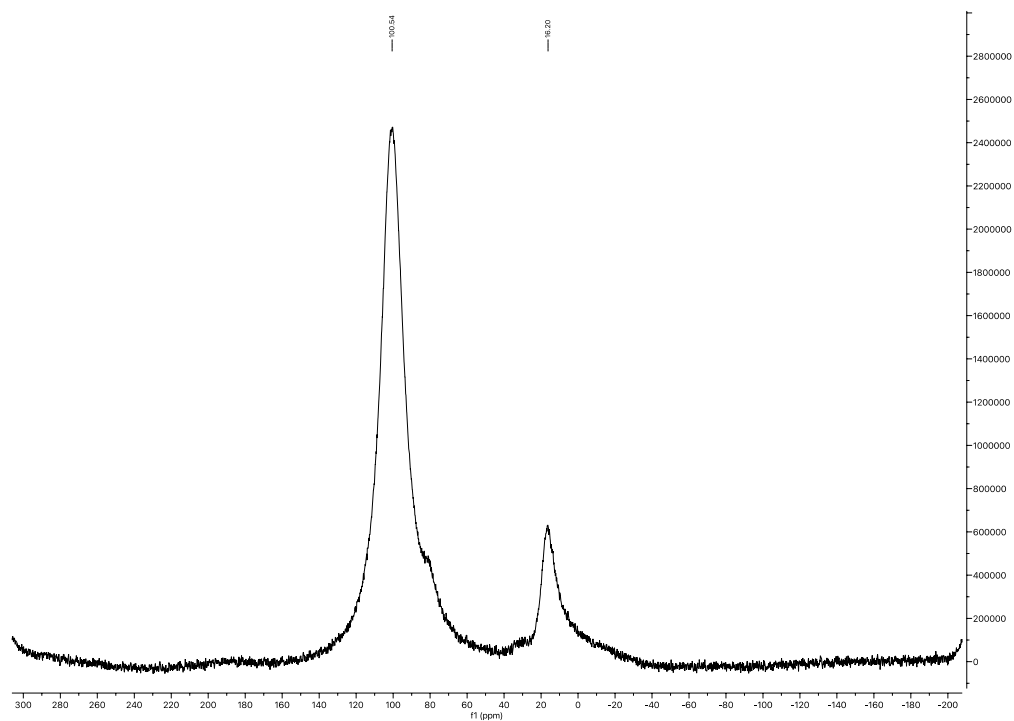

**Figure S160** The  $^{45}\text{Sc}$  NMR spectrum of  $[\text{Sc}(\text{L}^{210})]^+$  in MeOD.

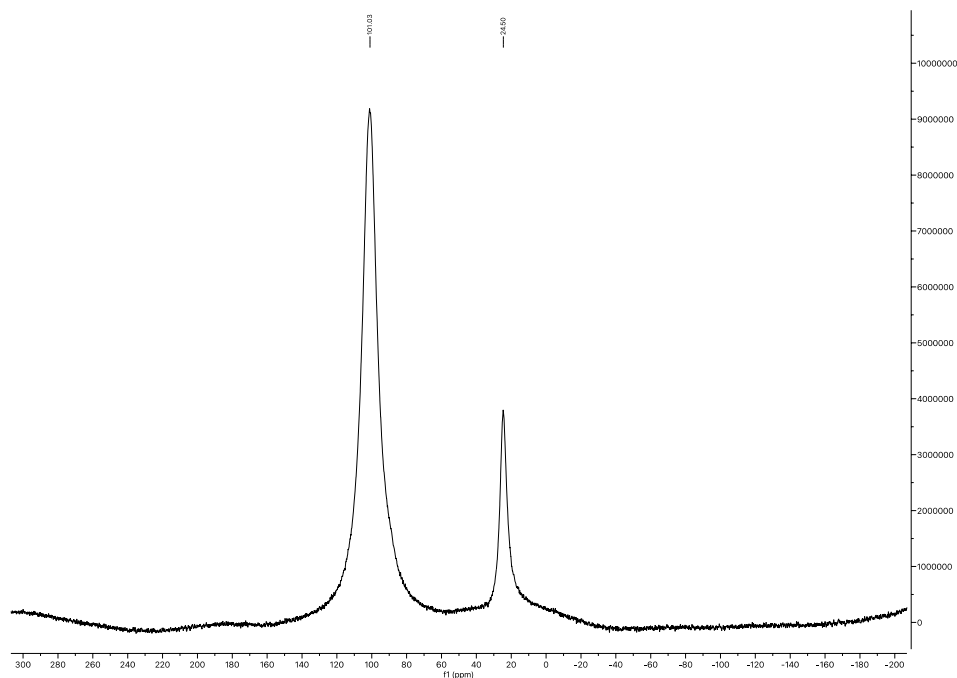

Figure S161 The  $^{45}\text{Sc}$  NMR spectrum of  $[\text{Sc}(\text{L}^{210})]^+$  in  $\text{D}_2\text{O}$ .

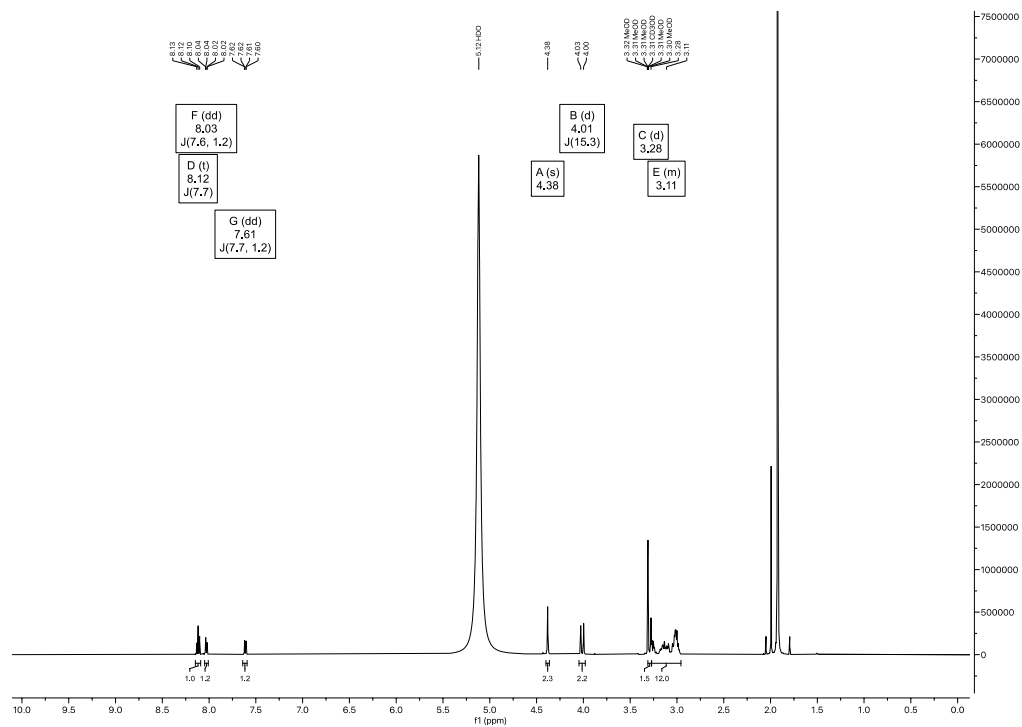

Figure S162 The  $^1\text{H}$  NMR spectrum of  $[\text{Sc}(\text{L}^{201})]$  in  $\text{MeOD}$ .



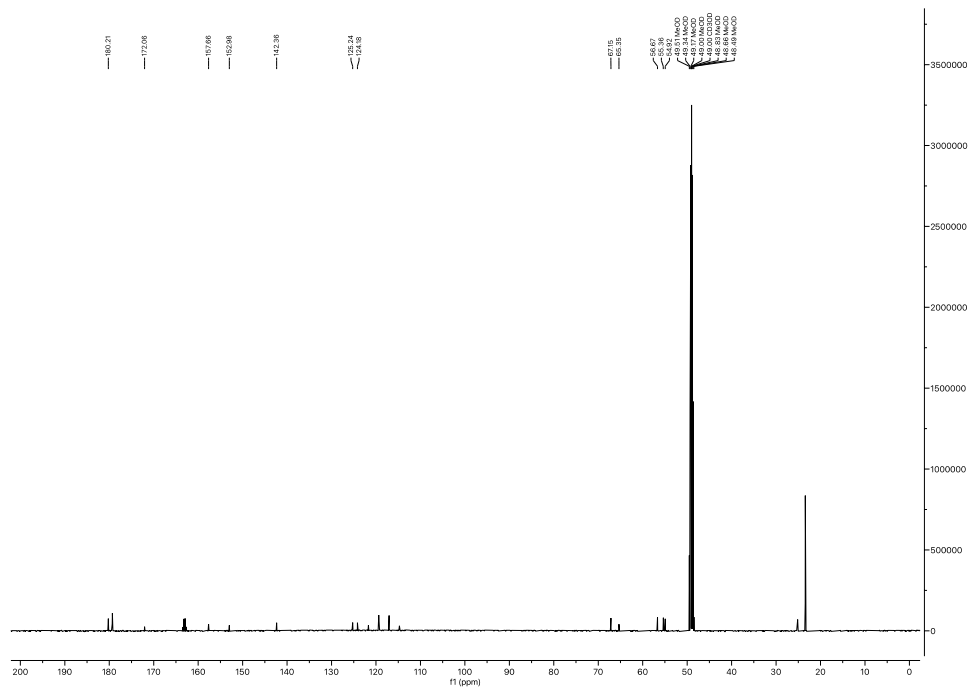

**Figure S163** The  $^{13}\text{C}\{^1\text{H}\}$  NMR spectrum of  $[\text{Sc}(\text{L}^{201})]$  in MeOD.

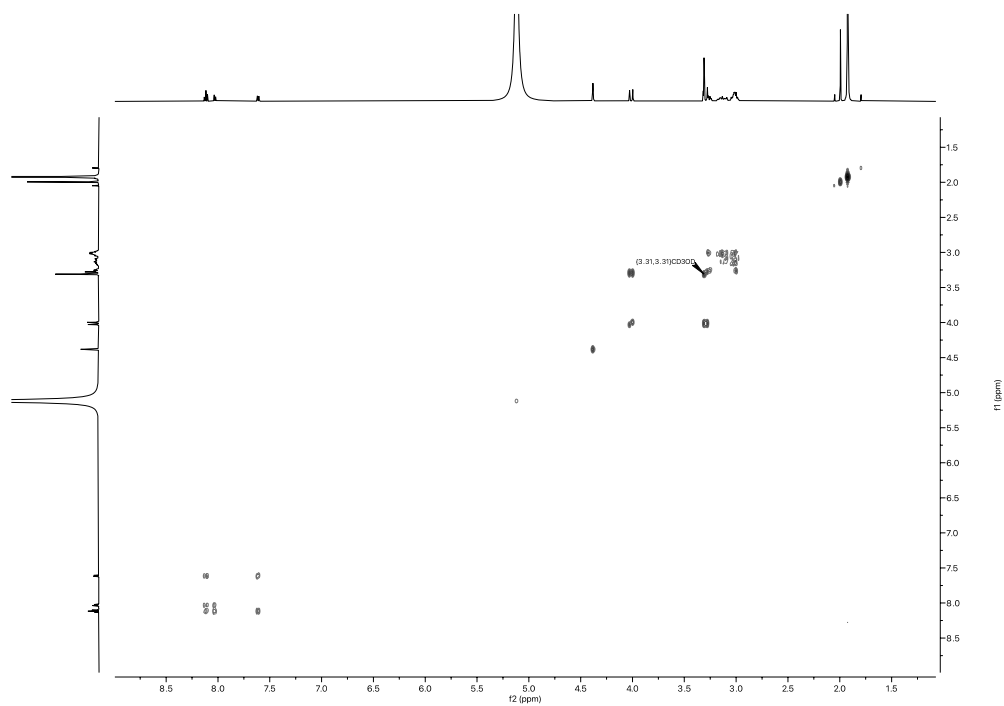

**Figure S164** The  $^1\text{H}\text{-}^1\text{H}$  COSY NMR spectrum of  $[\text{Sc}(\text{L}^{201})]$  in MeOD.

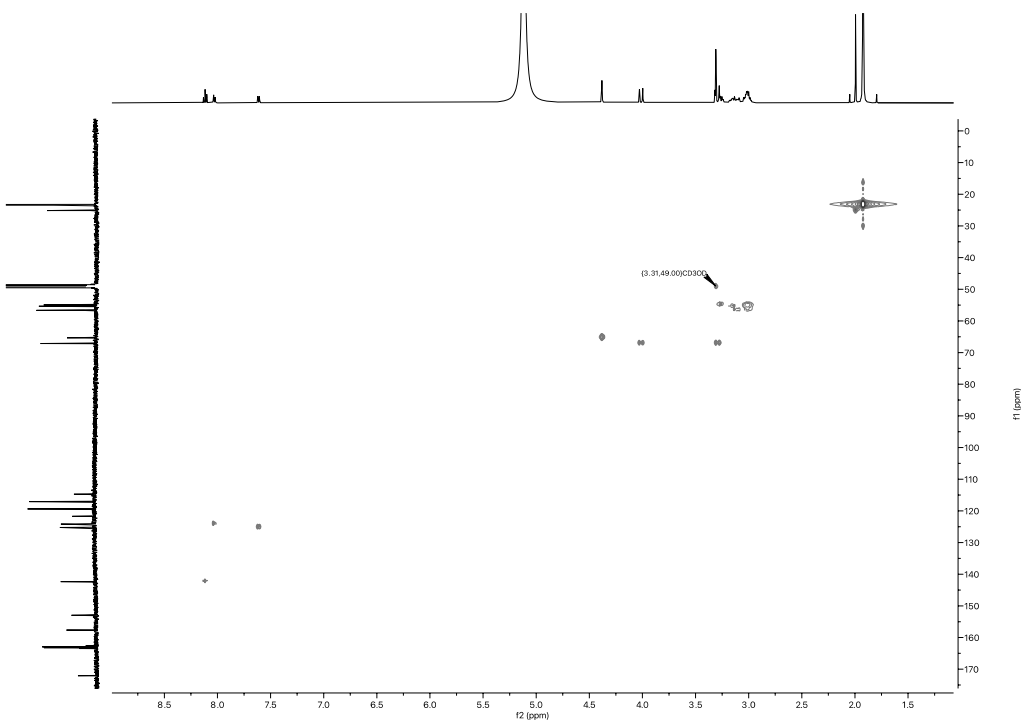

**Figure S165** The  $^1\text{H}$ - $^{13}\text{C}$  HSQC NMR spectrum of  $[\text{Sc}(\text{L}^{201})]$  in MeOD.

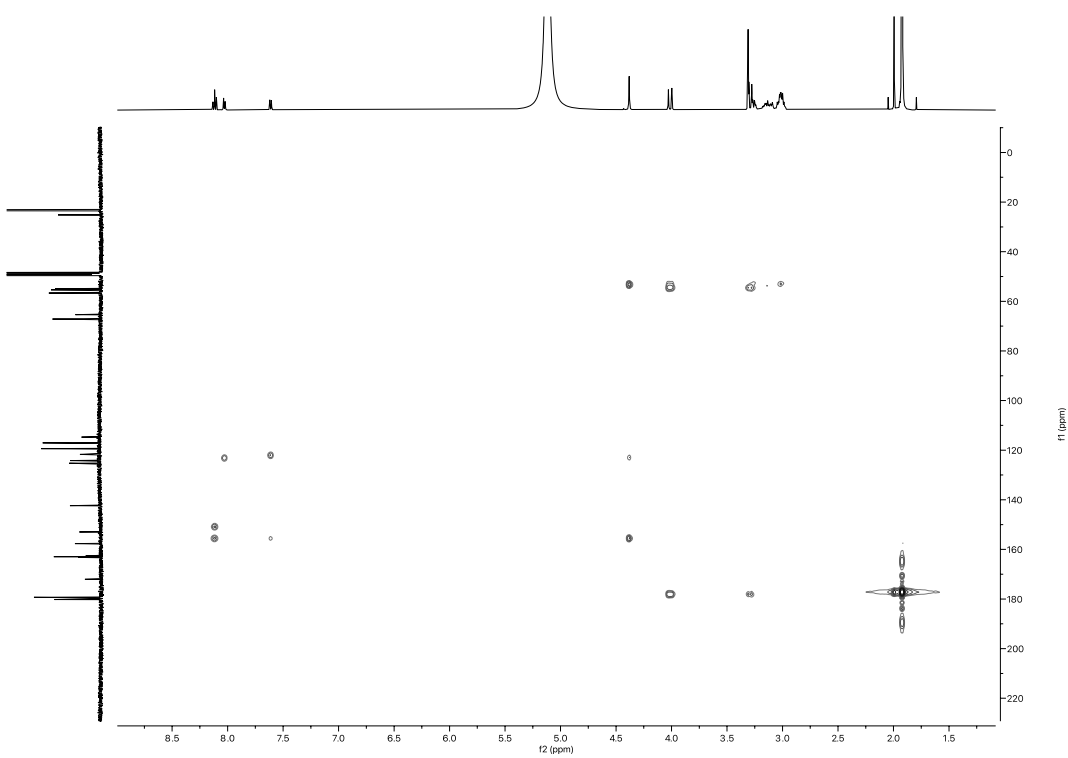

**Figure S166** The  $^1\text{H}$ - $^{13}\text{C}$  HMBC NMR spectrum of  $[\text{Sc}(\text{L}^{201})]$  in MeOD.

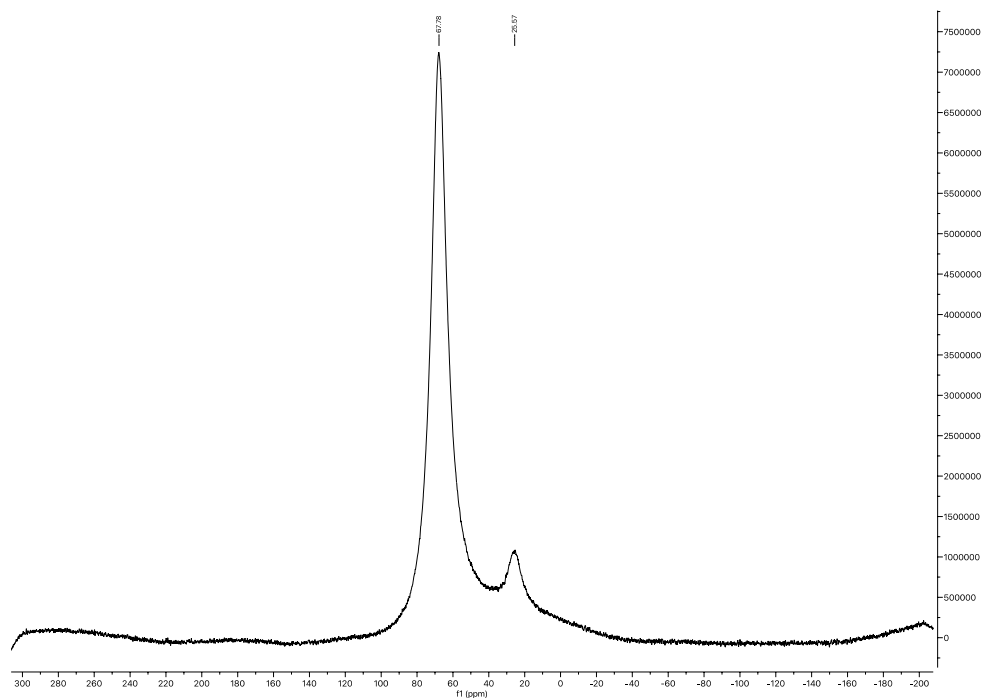

**Figure S167** The  $^{45}\text{Sc}$  NMR spectrum of  $[\text{Sc}(\text{L}^{201})]$  in MeOD.

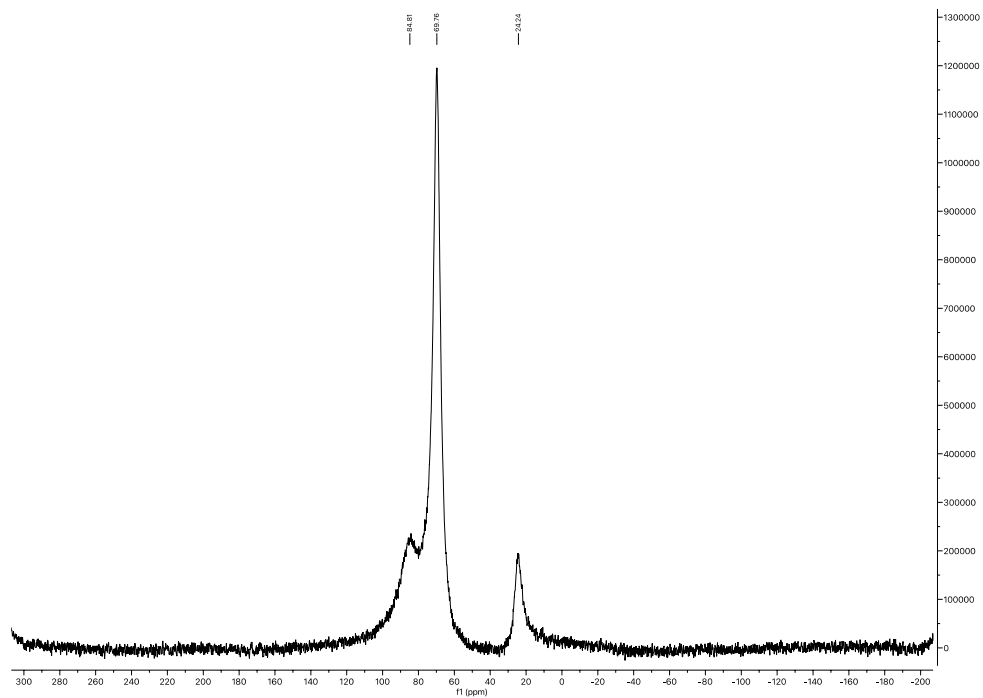

**Figure S168** The  $^{45}\text{Sc}$  NMR spectrum of  $[\text{Sc}(\text{L}^{201})]$  in  $\text{D}_2\text{O}$ .

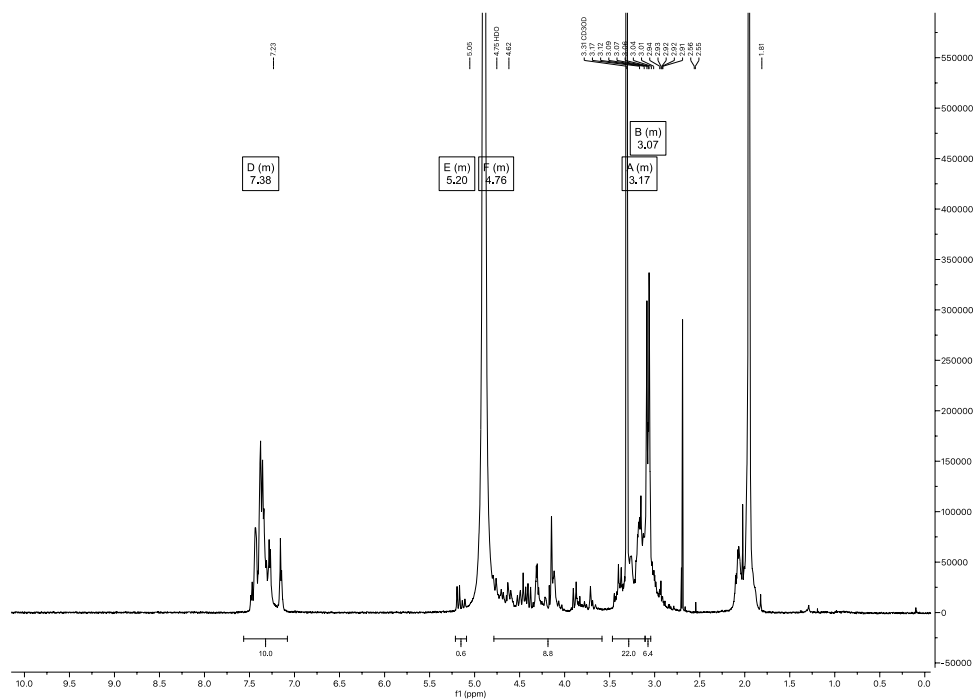

Figure S169 The  $^1\text{H}$  NMR spectrum of  $[\text{Sc}(\text{L}^{120})]^{2+}$  in MeOD.

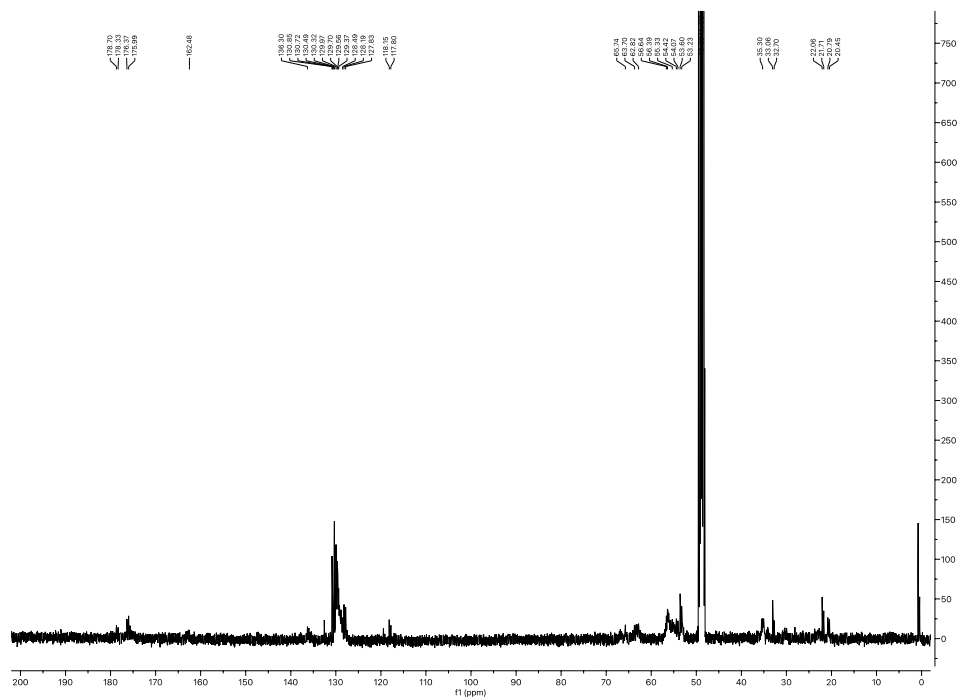

Figure S170 The  $^{13}\text{C}\{^1\text{H}\}$  NMR spectrum of  $[\text{Sc}(\text{L}^{120})]^{2+}$  in MeOD.

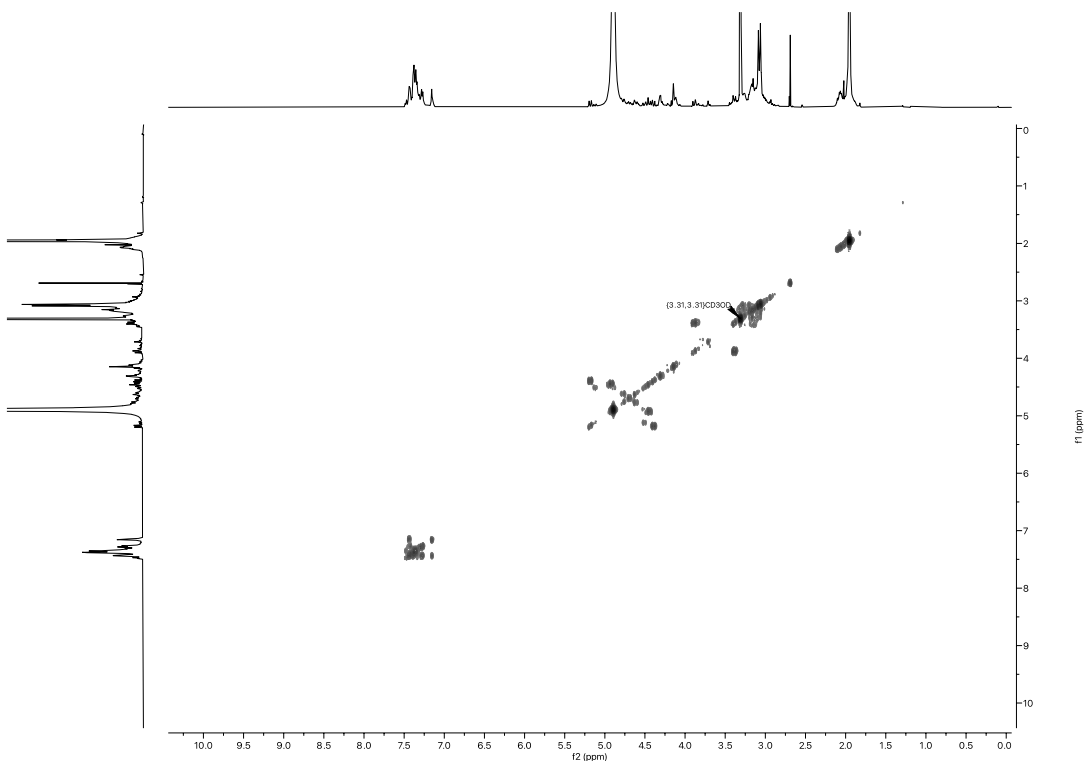

**Figure S171** The  $^1\text{H}$ - $^1\text{H}$  COSY NMR spectrum of  $[\text{Sc}(\text{L}^{120})]^{2+}$  in MeOD.

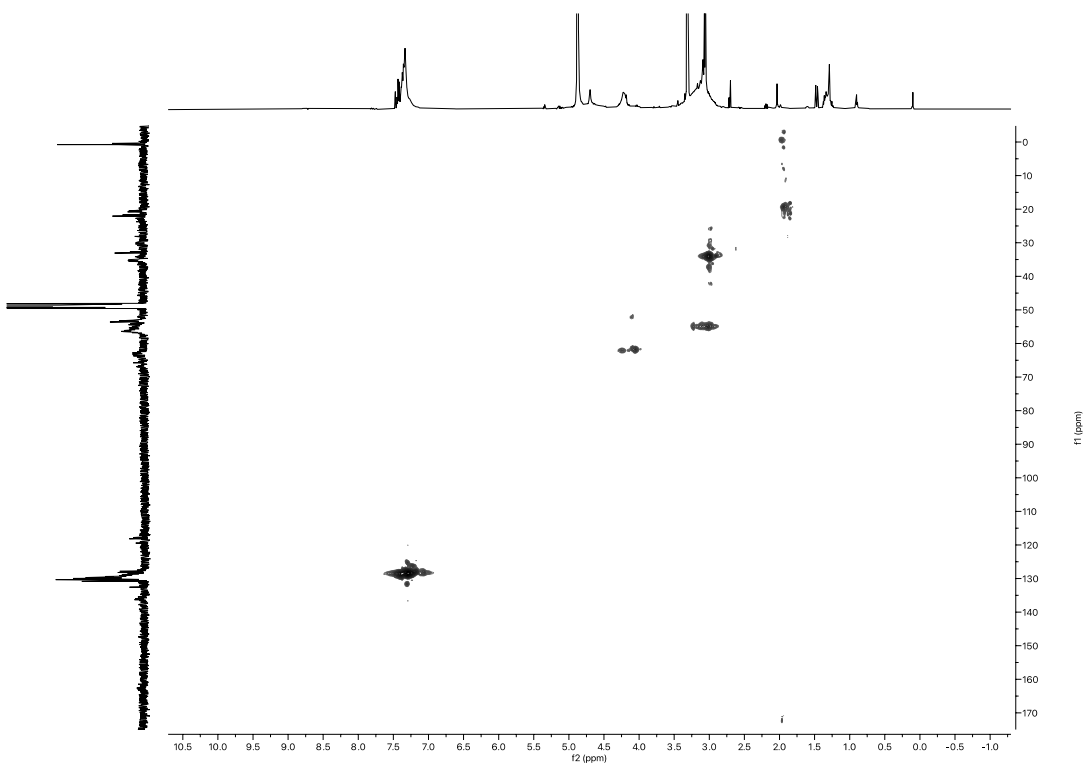

**Figure S172** The  $^1\text{H}$ - $^{13}\text{C}$  HSQC NMR spectrum of  $[\text{Sc}(\text{L}^{120})]^{2+}$  in MeOD.

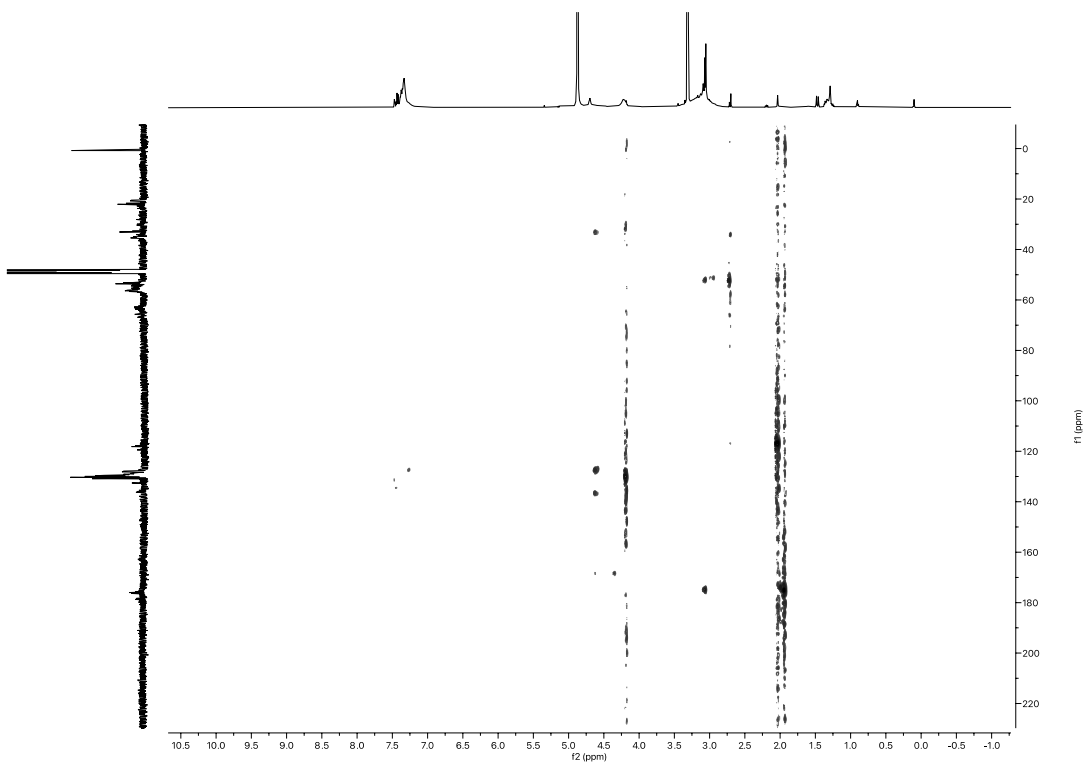

Figure S173 The  $^1\text{H}$ - $^{13}\text{C}$  HMBC NMR spectrum of  $[\text{Sc}(\text{L}^{120})]^{2+}$  in MeOD.

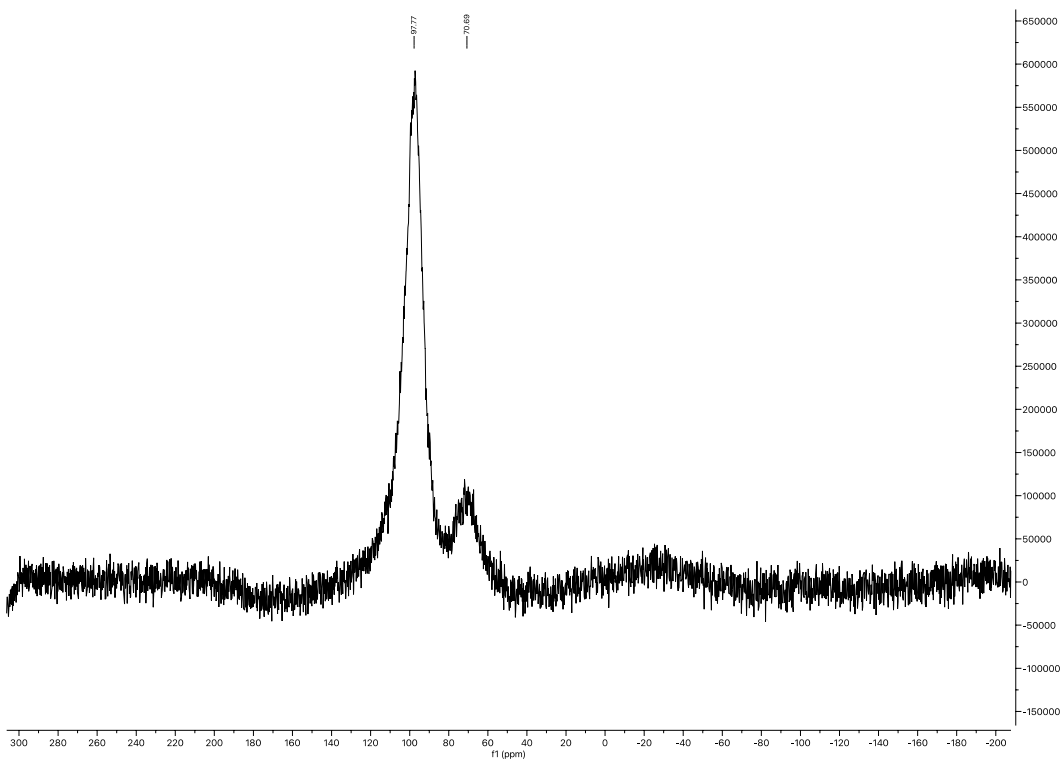

Figure S174 The  $^{45}\text{Sc}$  NMR spectrum of  $[\text{Sc}(\text{L}^{120})]^{2+}$  in MeOD.

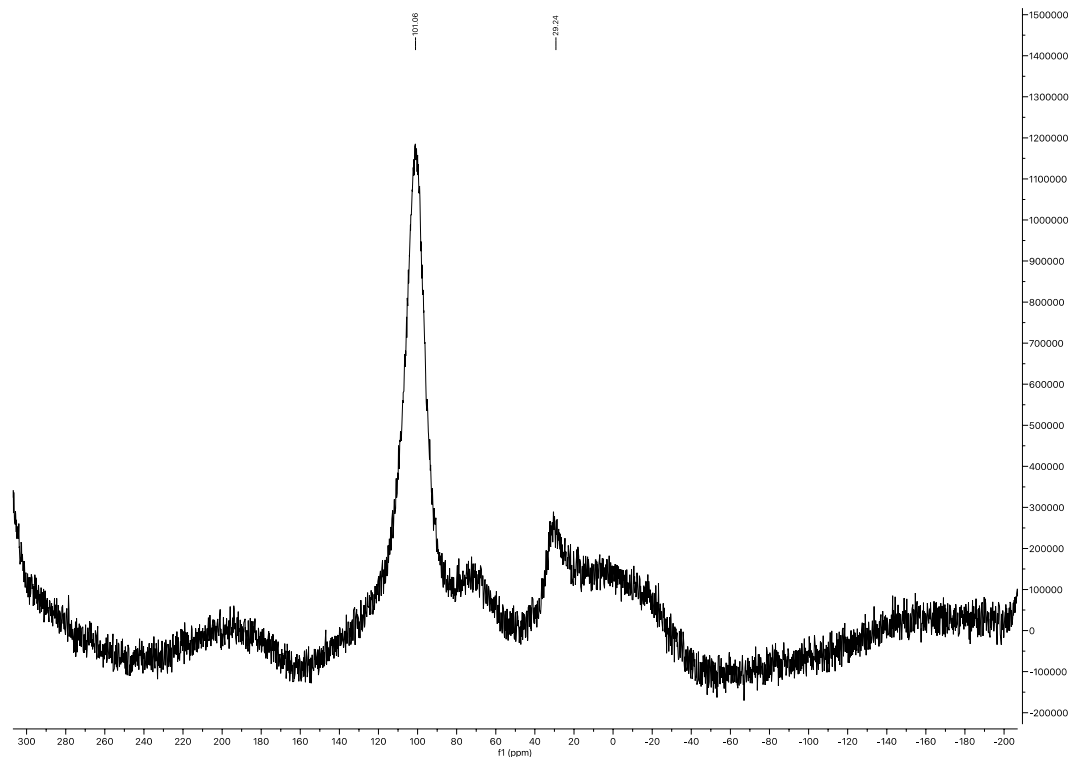

Figure S175 The  $^{45}\text{Sc}$  NMR spectrum of  $[\text{Sc}(\text{L}^{120})]^{2+}$  in  $\text{D}_2\text{O}$ .

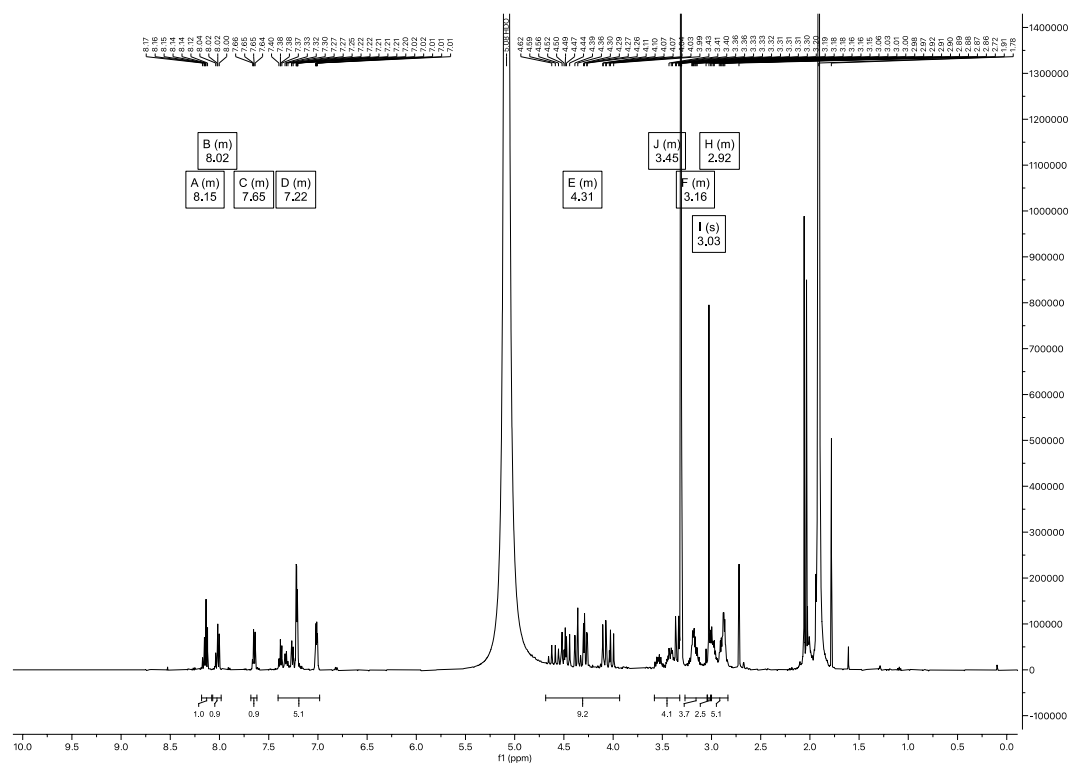

Figure S176 The  $^1\text{H}$  NMR spectrum of  $[\text{Sc}(\text{L}^{111})]^+$  in  $\text{MeOD}$ .

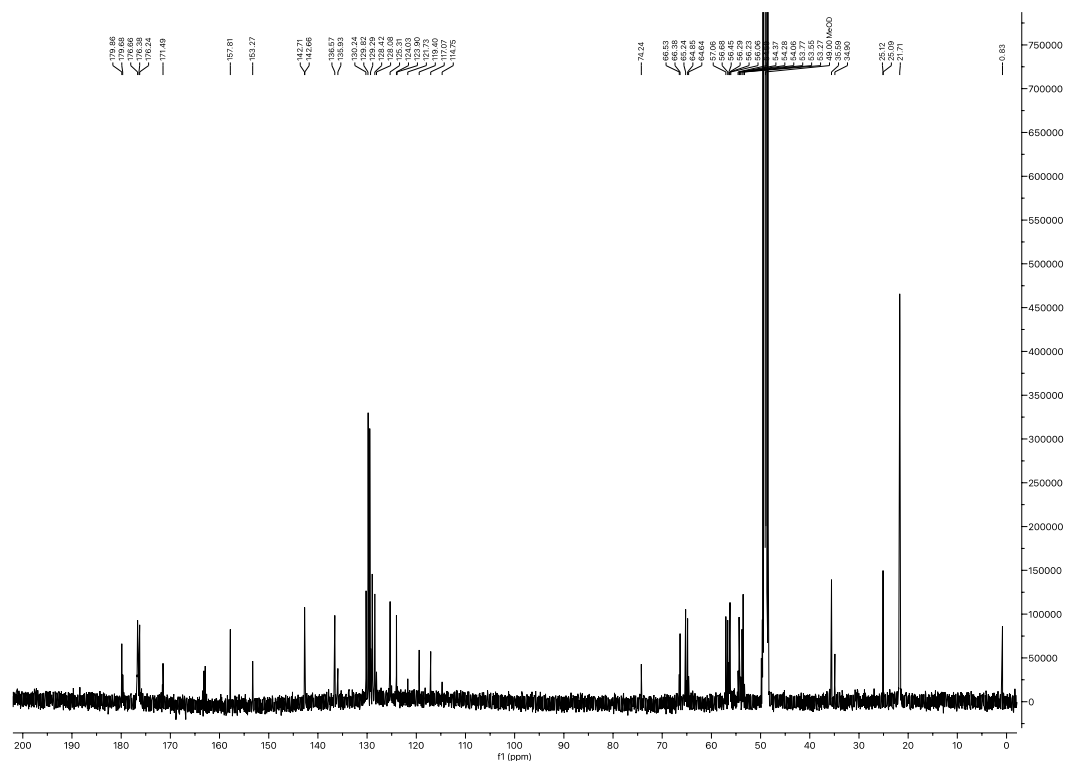

**Figure S177** The  $^{13}\text{C}\{^1\text{H}\}$  NMR spectrum of  $[\text{Sc}(\text{L}^{111})]^+$  in MeOD.

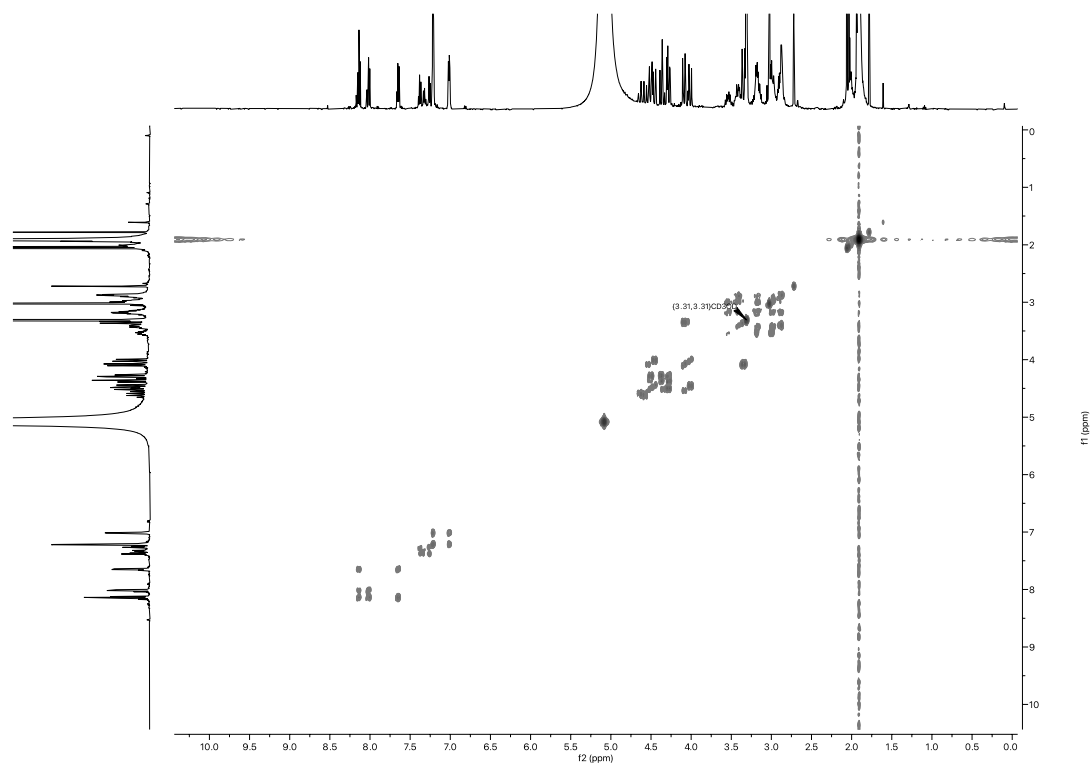

**Figure S178** The  $^1\text{H}-^1\text{H}$  COSY NMR spectrum of  $[\text{Sc}(\text{L}^{111})]^+$  in MeOD.



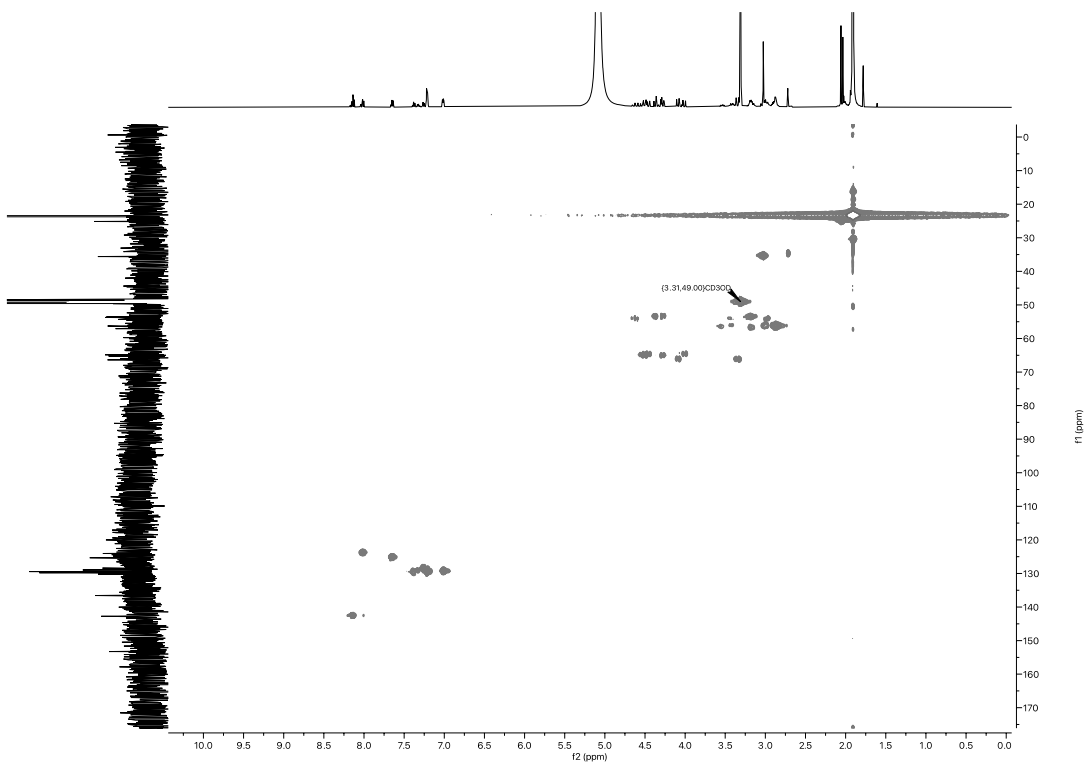

Figure S179 The  $^1\text{H}$ - $^{13}\text{C}$  HSQC NMR spectrum of  $[\text{Sc}(\text{L}^{111})]^+$  in MeOD.

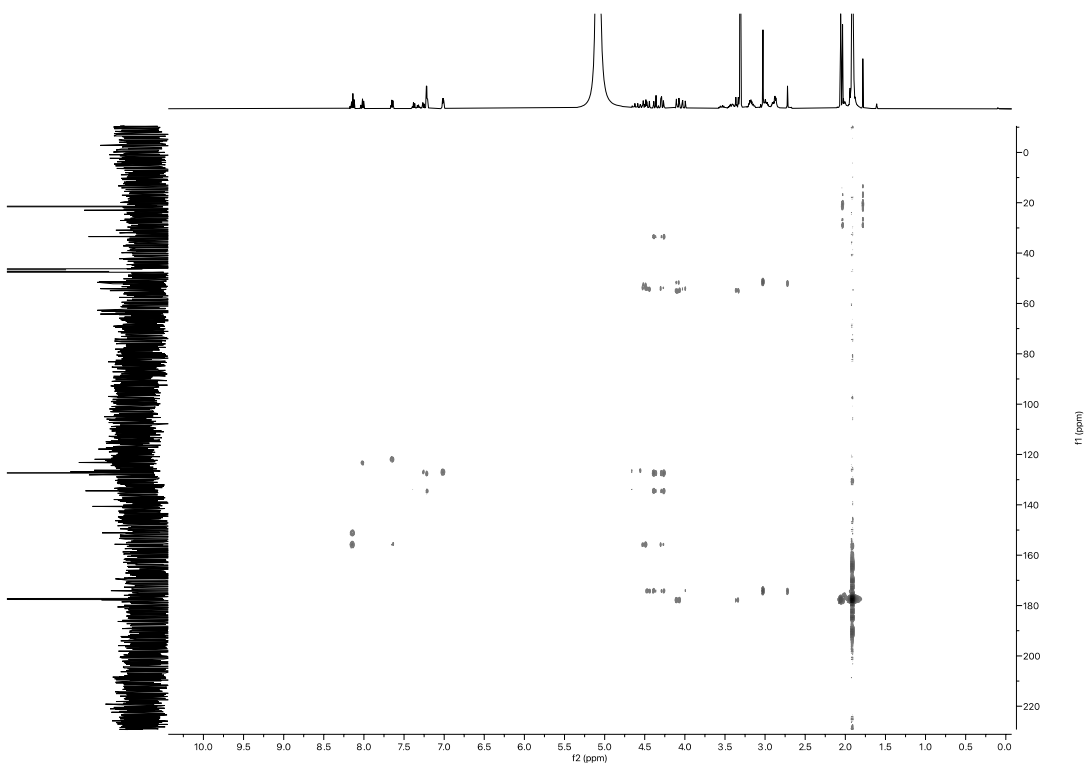

Figure S180 The  $^1\text{H}$ - $^{13}\text{C}$  HMBC NMR spectrum of  $[\text{Sc}(\text{L}^{111})]^+$  in MeOD.

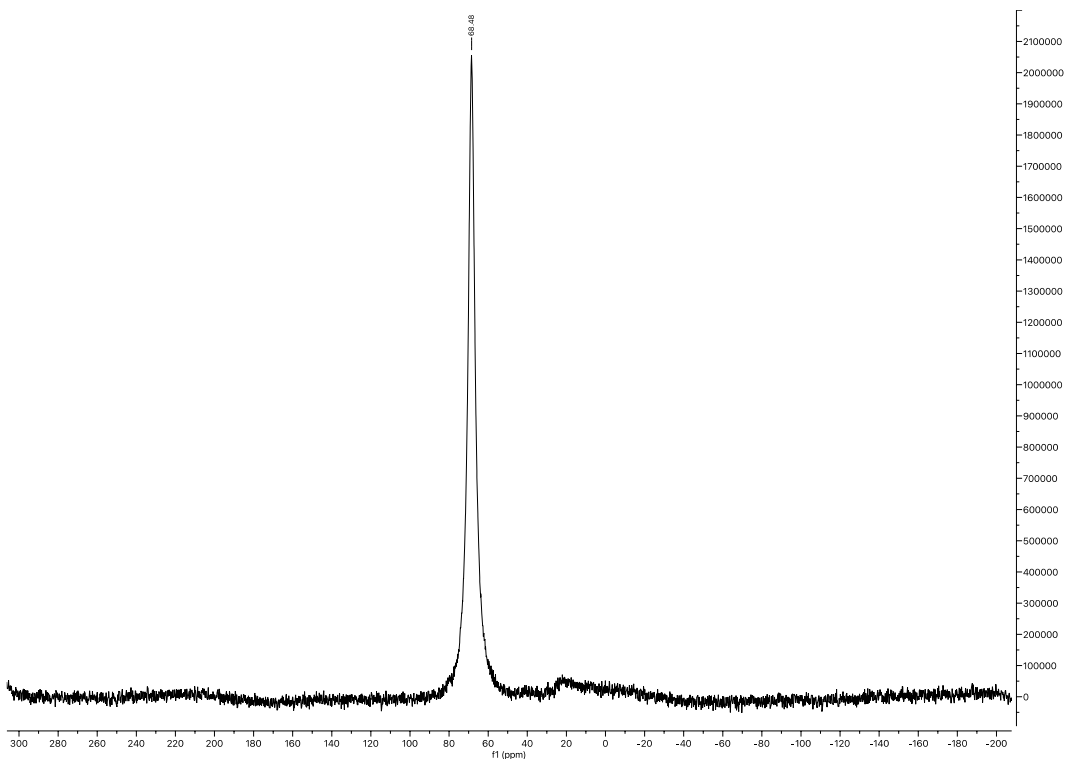

**Figure S181** The  $^{45}\text{Sc}$  NMR spectrum of  $[\text{Sc}(\text{L}^{11})]^+$  in MeOD.

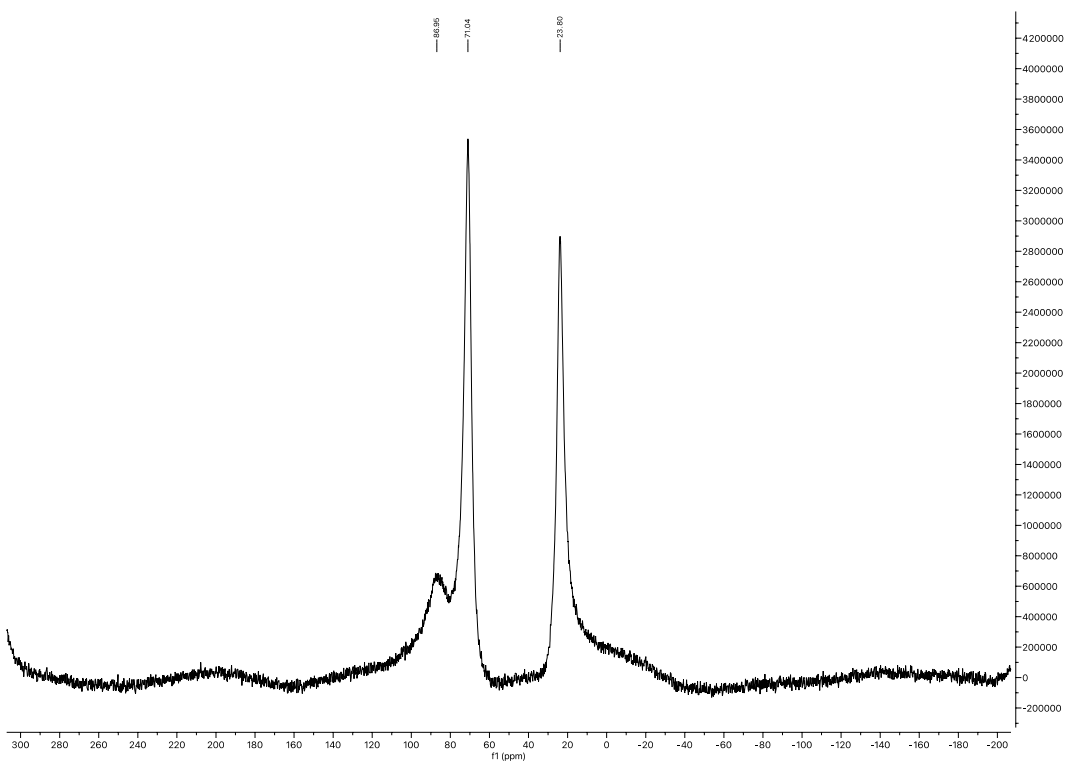

**Figure S182** The  $^{45}\text{Sc}$  NMR spectrum of  $[\text{Sc}(\text{L}^{11})]^+$  in  $\text{D}_2\text{O}$ .

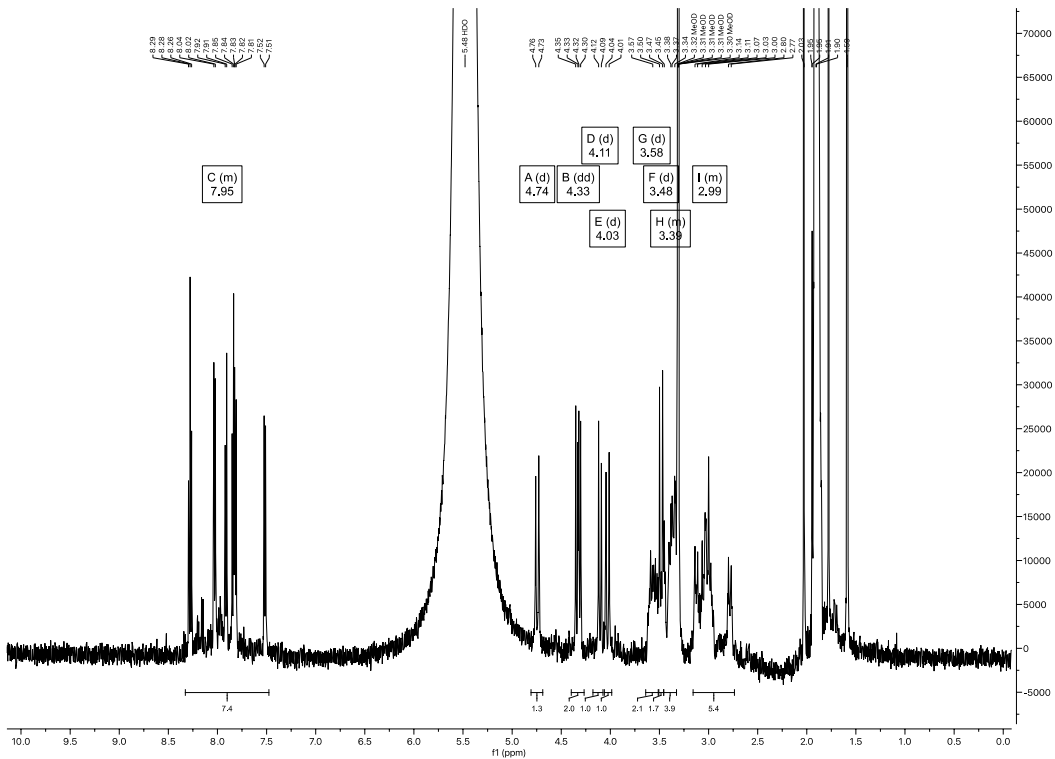

Figure S183 The  $^1\text{H}$  NMR spectrum of  $[\text{Sc}(\text{L}^{102})]$  in MeOD.

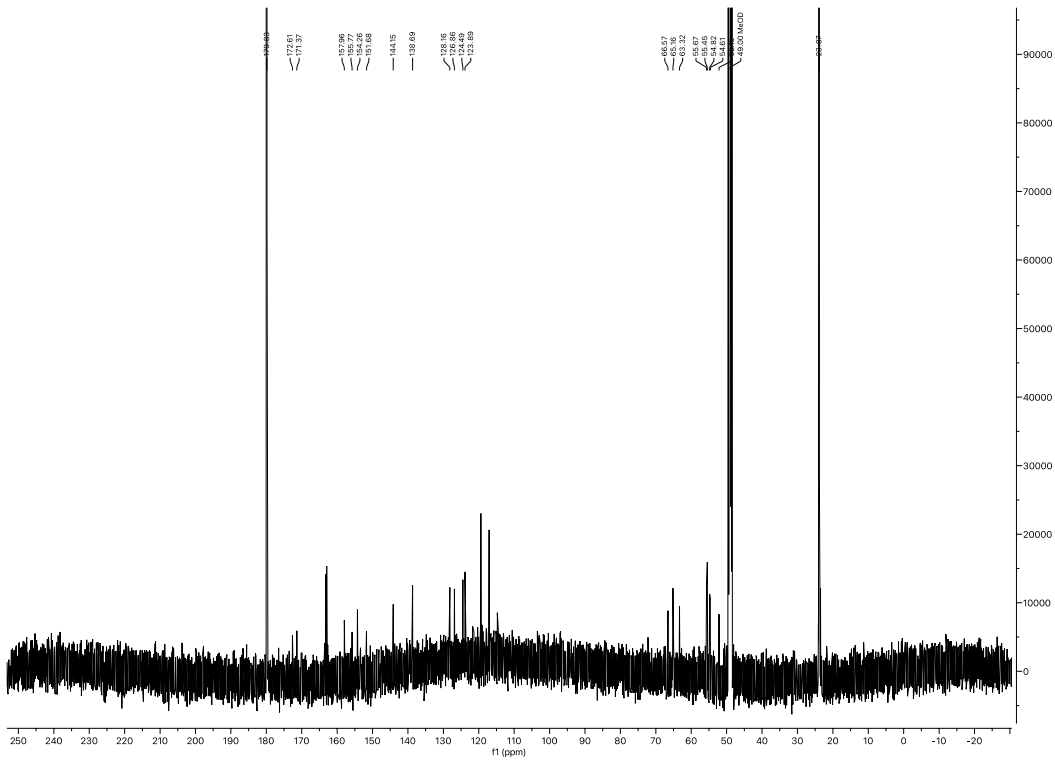

Figure S184 The  $^{13}\text{C}\{^1\text{H}\}$  NMR spectrum of  $[\text{Sc}(\text{L}^{102})]$  in MeOD.

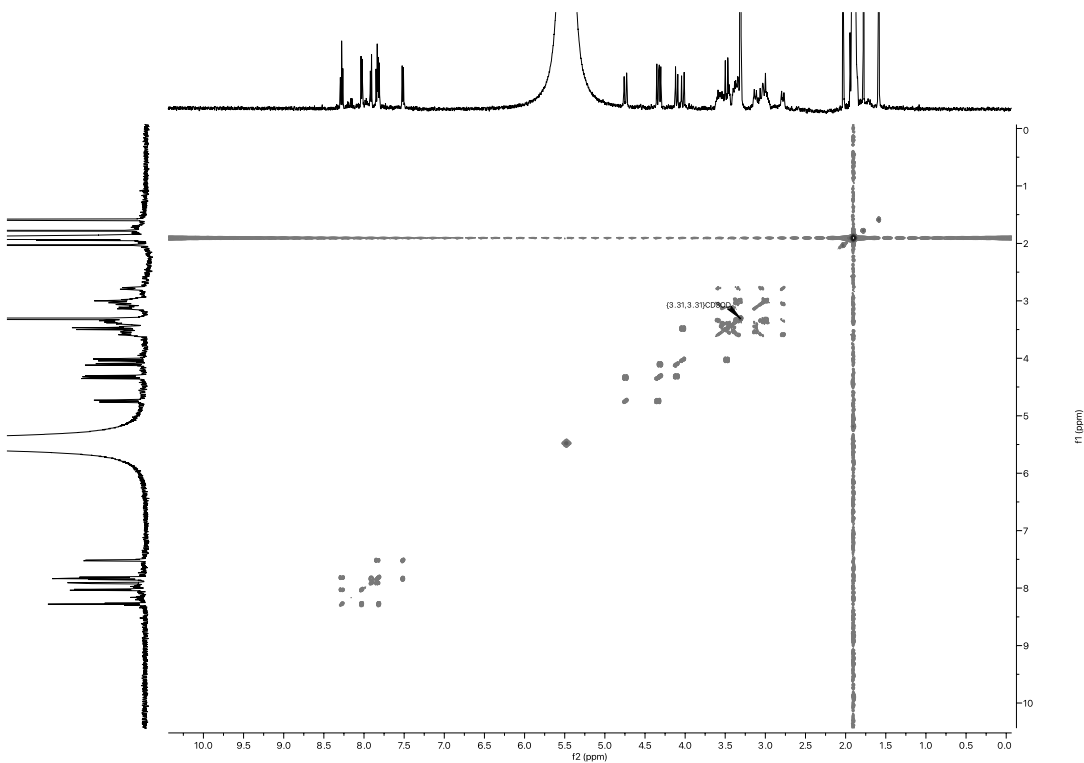

Figure S185 The <sup>1</sup>H-<sup>1</sup>H COSY NMR spectrum of [Sc(L<sup>102</sup>)] in MeOD.

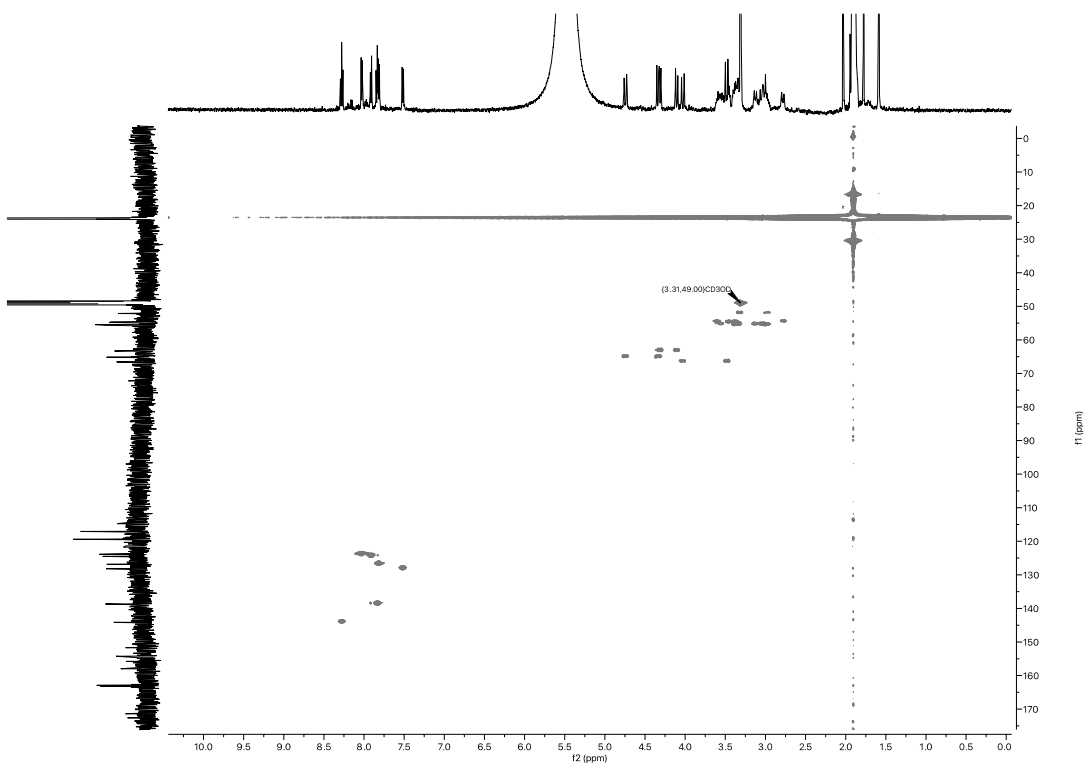

Figure S186 The <sup>1</sup>H-<sup>13</sup>C HSQC NMR spectrum of [Sc(L<sup>102</sup>)] in MeOD.

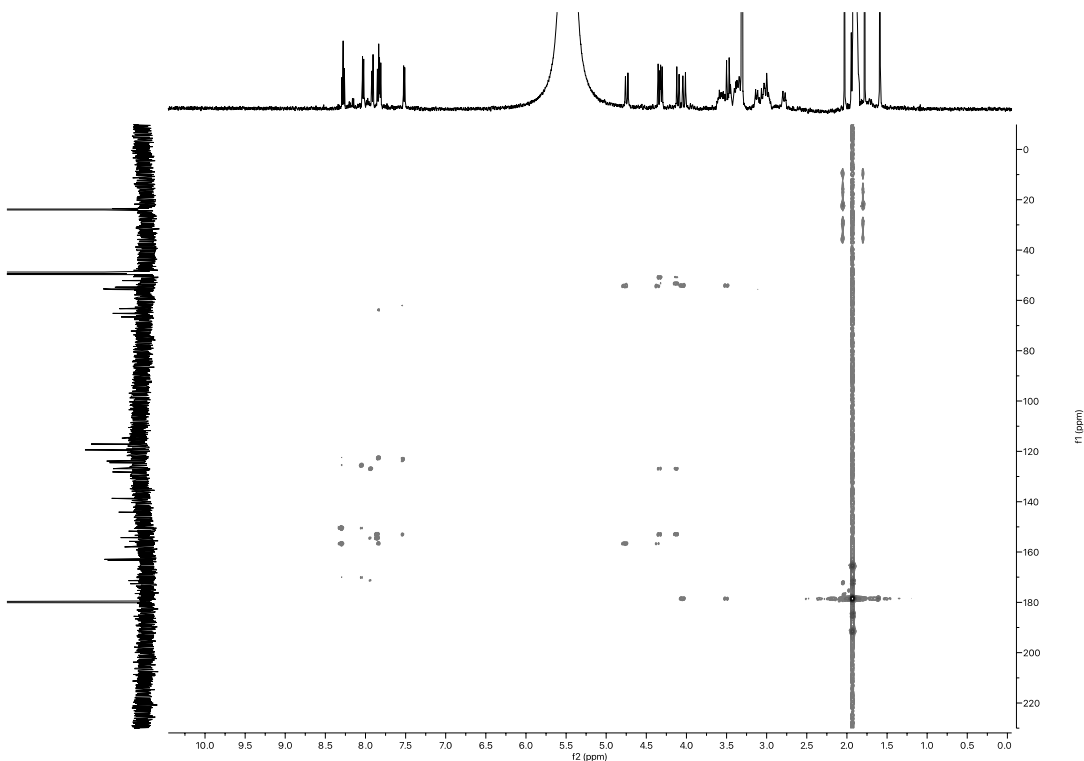

Figure S187 The  $^1\text{H}$ - $^{13}\text{C}$  HMBC NMR spectrum of  $[\text{Sc}(\text{L}^{102})]$  in MeOD.

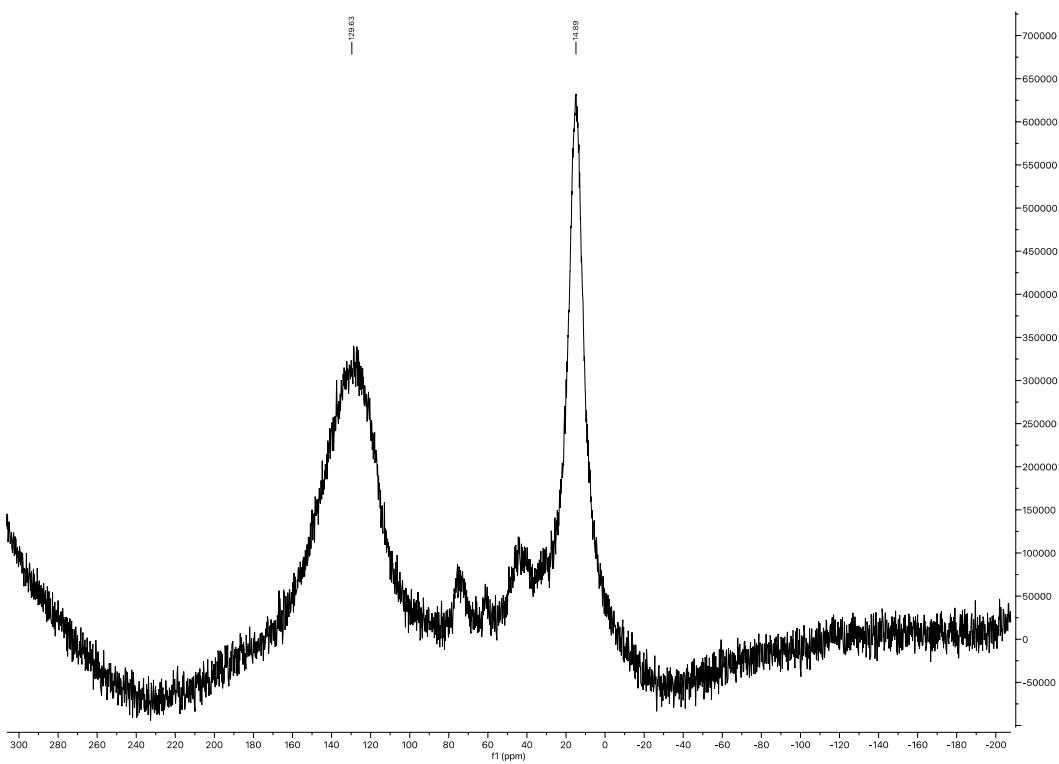

Figure S188 The  $^{45}\text{Sc}$  NMR spectrum of  $[\text{Sc}(\text{L}^{102})]$  in MeOD.

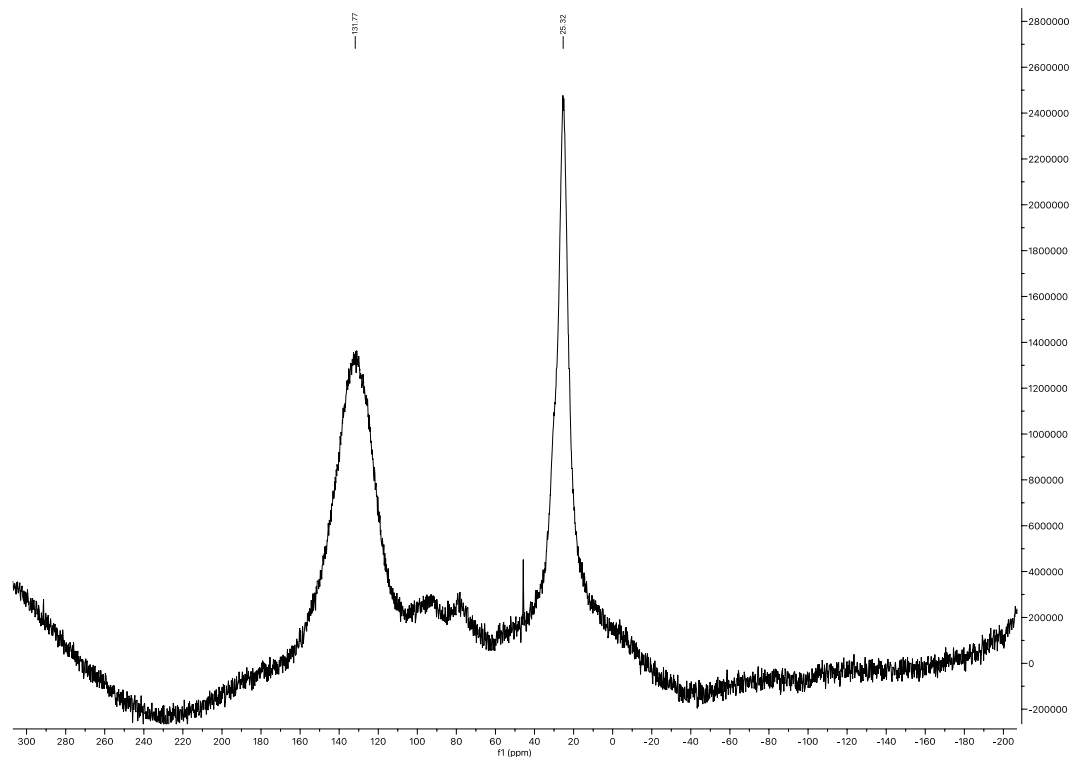

Figure S189 The  $^{45}\text{Sc}$  NMR spectrum of  $[\text{Sc}(\text{L}^{102})]$  in  $\text{D}_2\text{O}$ .

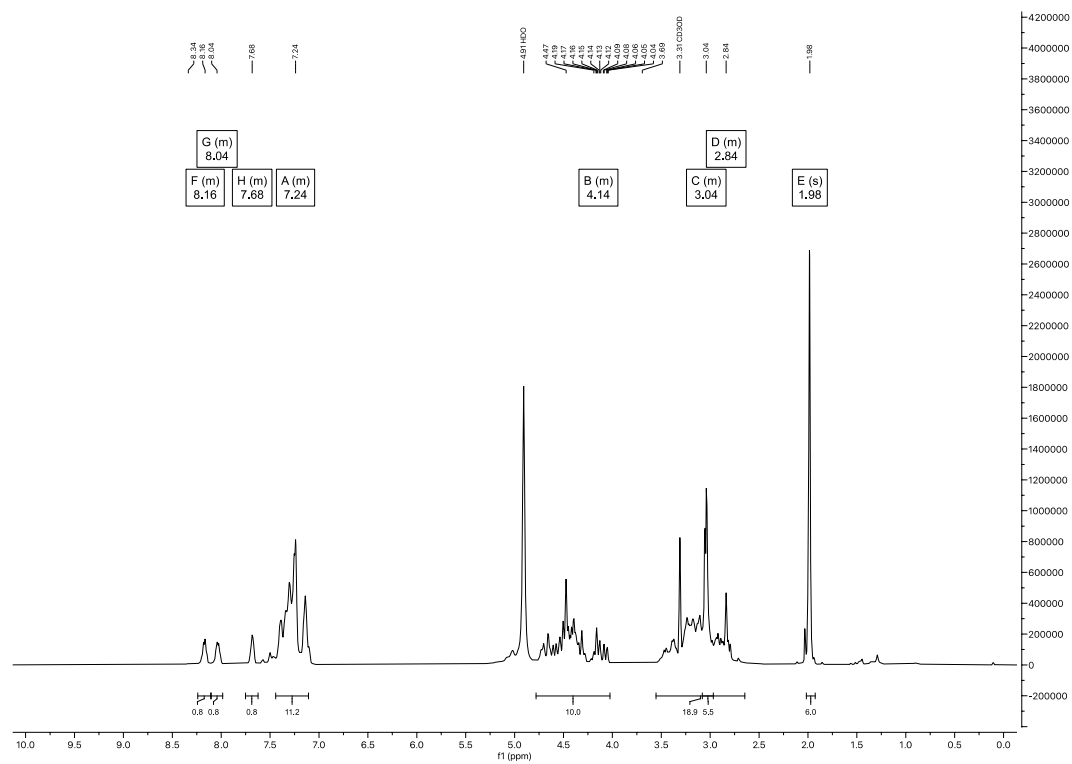

Figure S190 The  $^1\text{H}$  NMR spectrum of  $[\text{Sc}(\text{L}^{021})]^{2+}$  in  $\text{MeOD}$ .

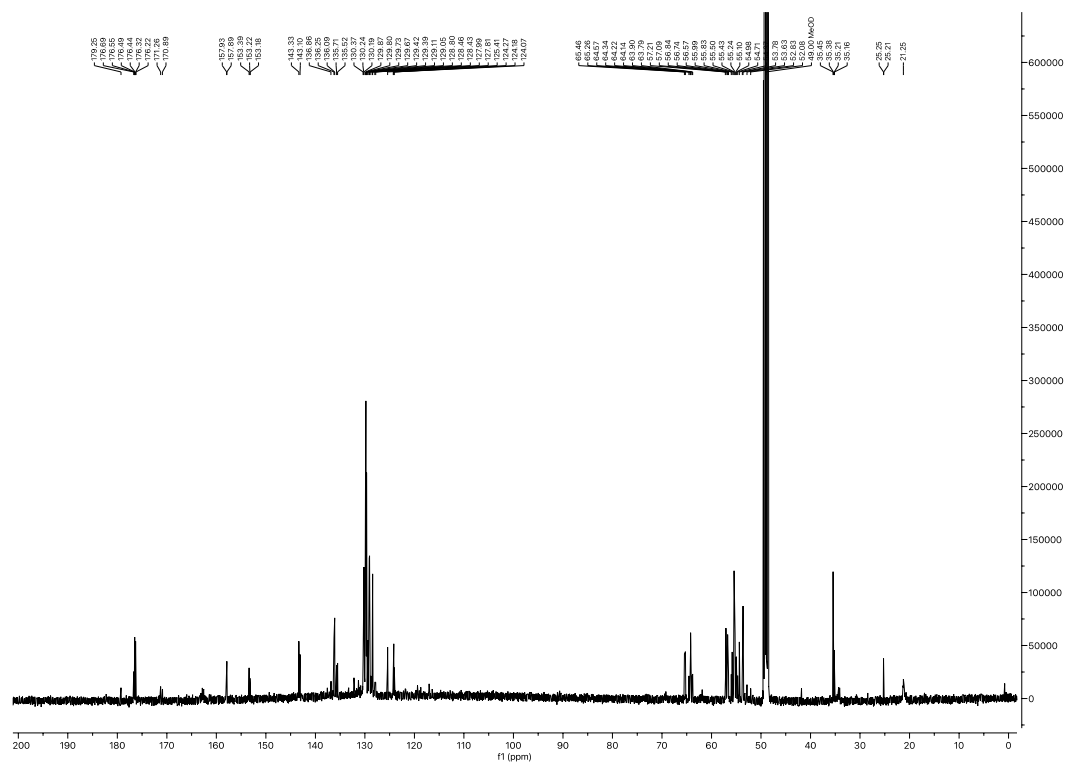

Figure S191 The  $^{13}\text{C}\{^1\text{H}\}$  NMR spectrum of  $[\text{Sc}(\text{L}^{021})]^{2+}$  in MeOD.

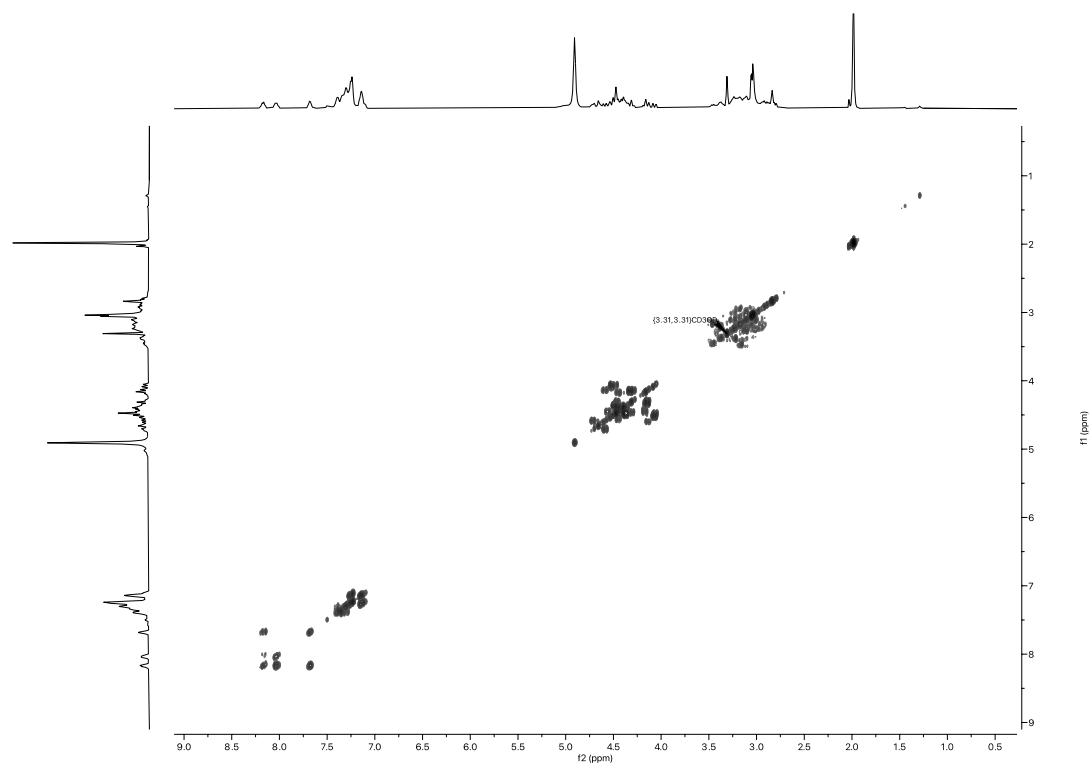

Figure S192 The  $^1\text{H}\text{-}^1\text{H}$  COSY NMR spectrum of  $[\text{Sc}(\text{L}^{021})]^{2+}$  in MeOD.

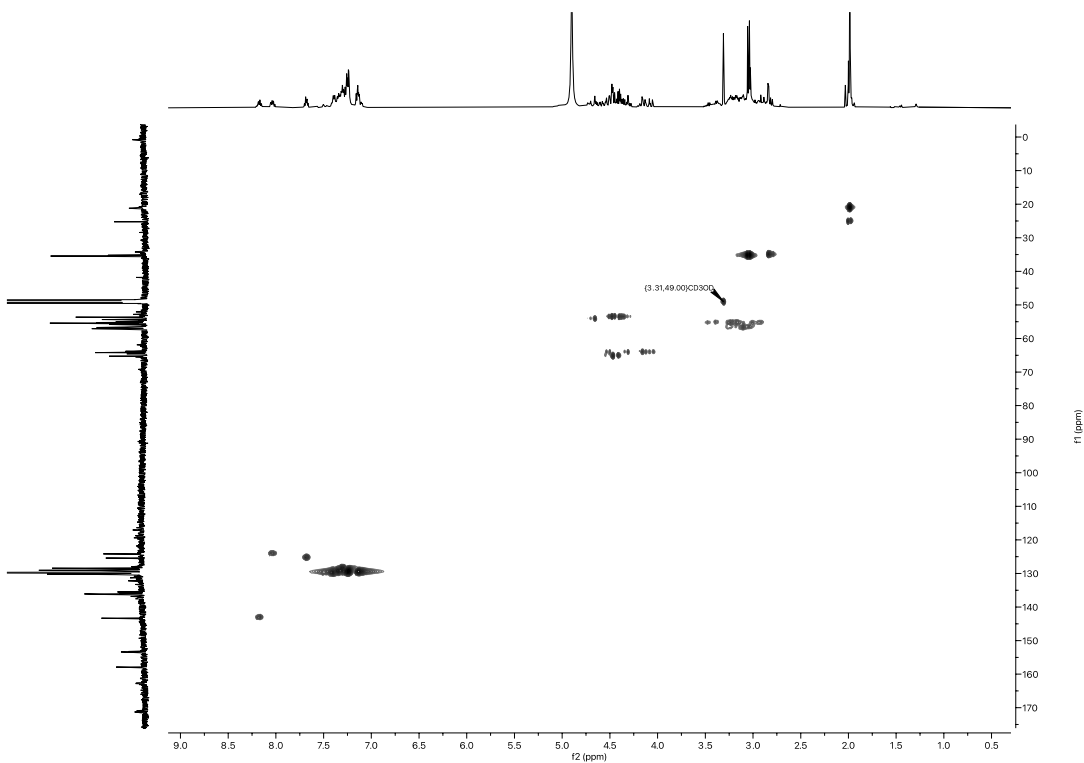

Figure S193 The  $^1\text{H}$ - $^{13}\text{C}$  HSQC NMR spectrum of  $[\text{Sc}(\text{L}^{021})]^{2+}$  in MeOD.

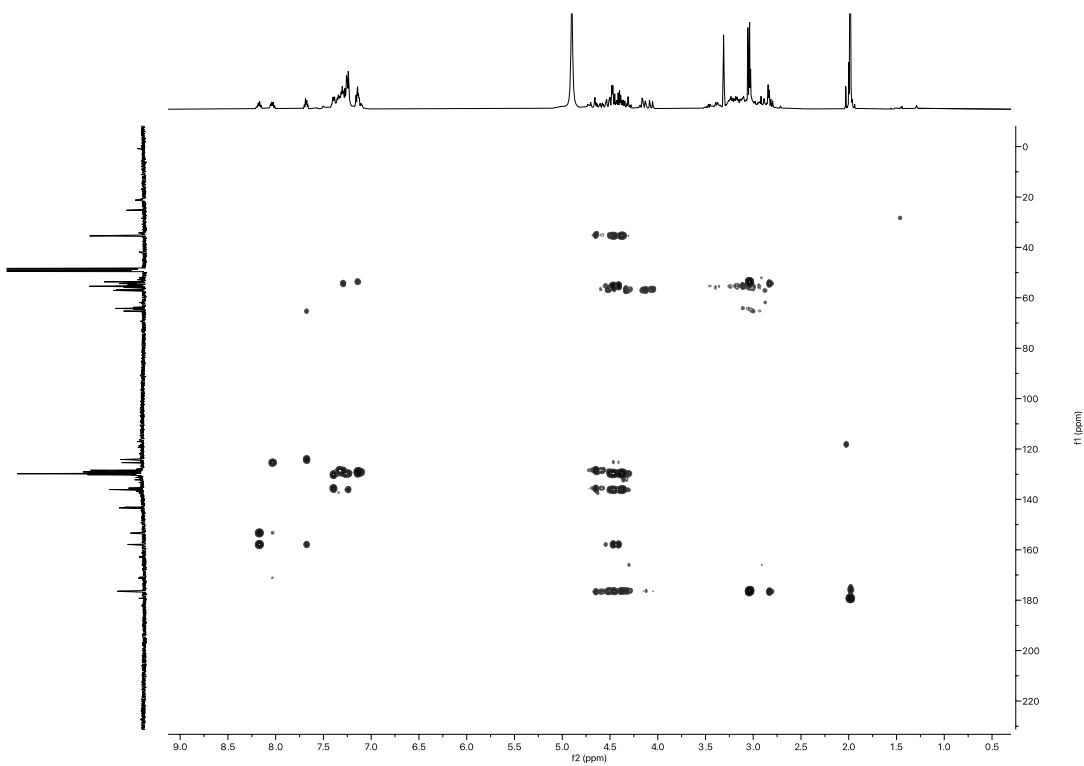

Figure S194 The  $^1\text{H}$ - $^{13}\text{C}$  HMBC NMR spectrum of  $[\text{Sc}(\text{L}^{021})]^{2+}$  in MeOD.



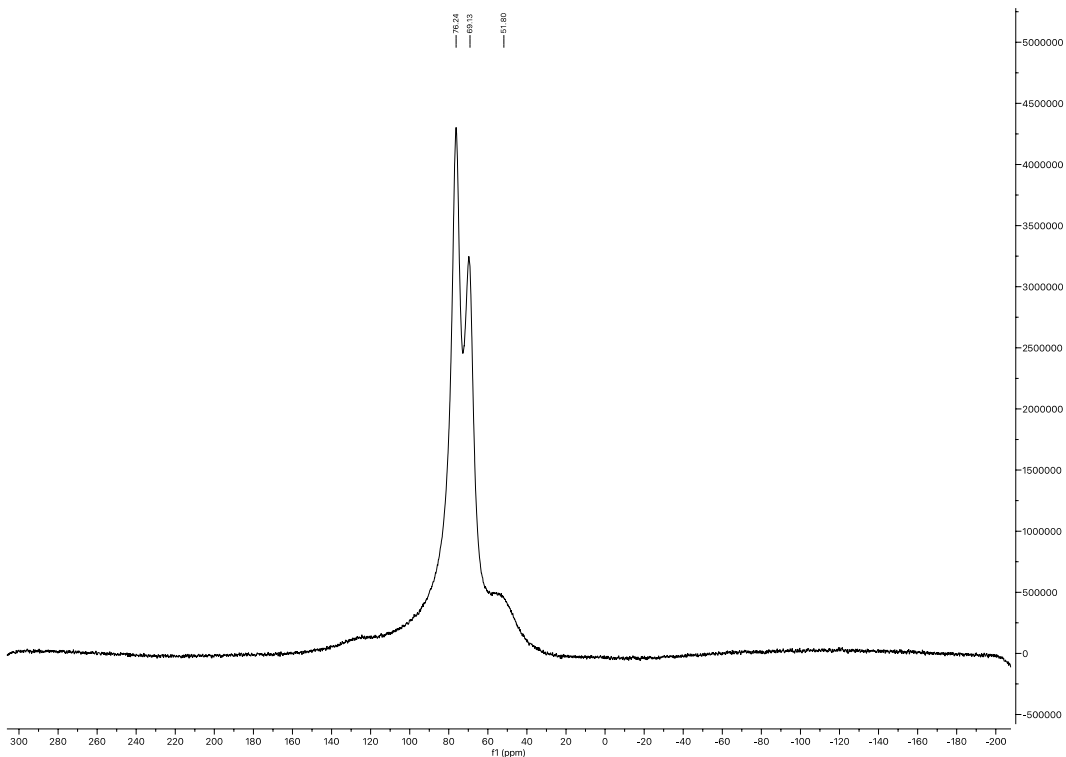

**Figure S195** The  $^{45}\text{Sc}$  NMR spectrum of  $[\text{Sc}(\text{L}^{021})]^{2+}$  in MeOD.

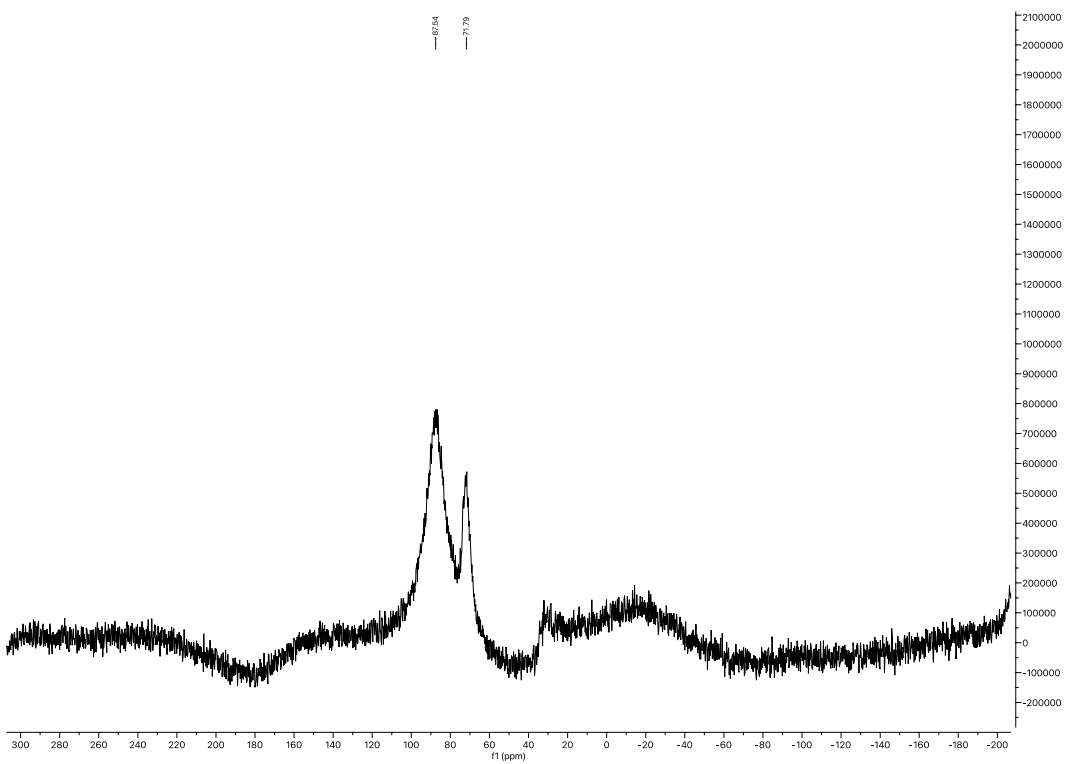

**Figure S196** The  $^{45}\text{Sc}$  NMR spectrum of  $[\text{Sc}(\text{L}^{021})]^{2+}$  in  $\text{D}_2\text{O}$ .

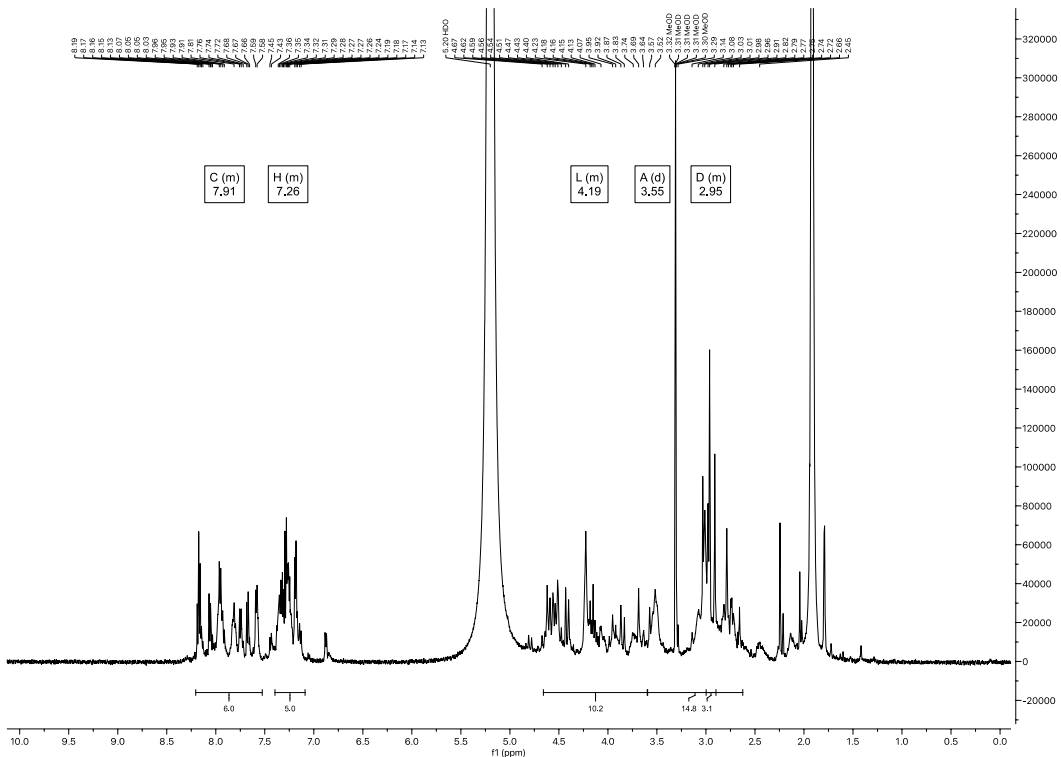

Figure S197 The  $^1\text{H}$  NMR spectrum of  $[\text{Sc}(\text{L}^{012})]^+$  in MeOD.

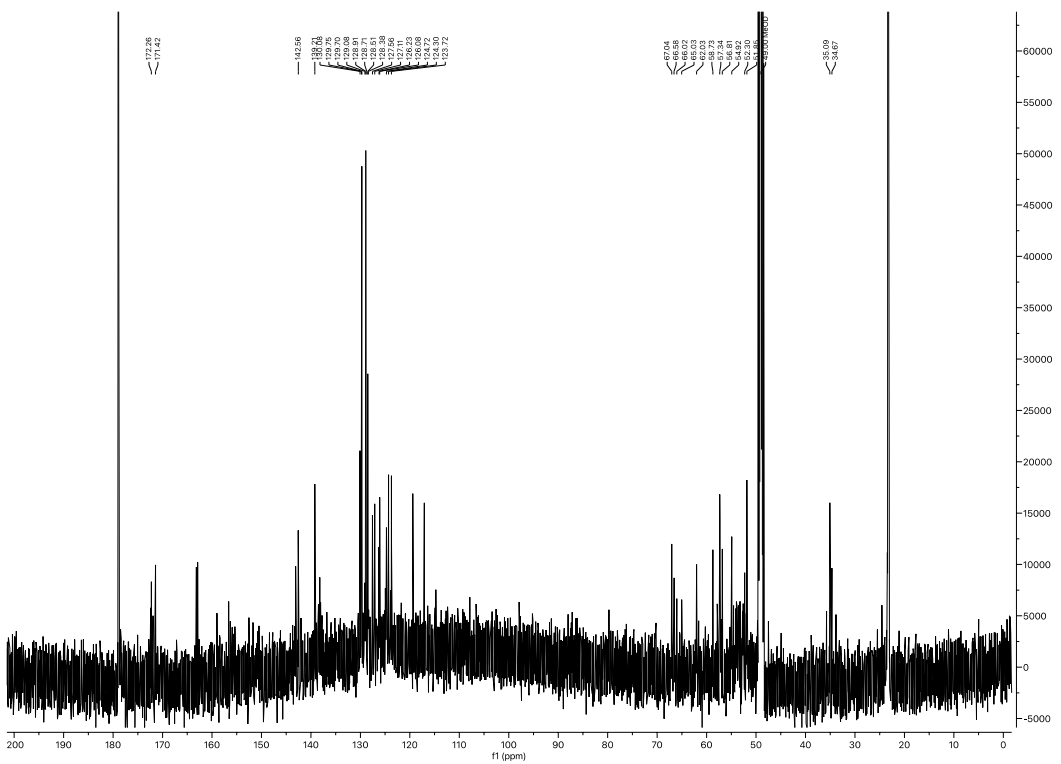

Figure S198 The  $^{13}\text{C}\{^1\text{H}\}$  NMR spectrum of  $[\text{Sc}(\text{L}^{012})]^+$  in MeOD.

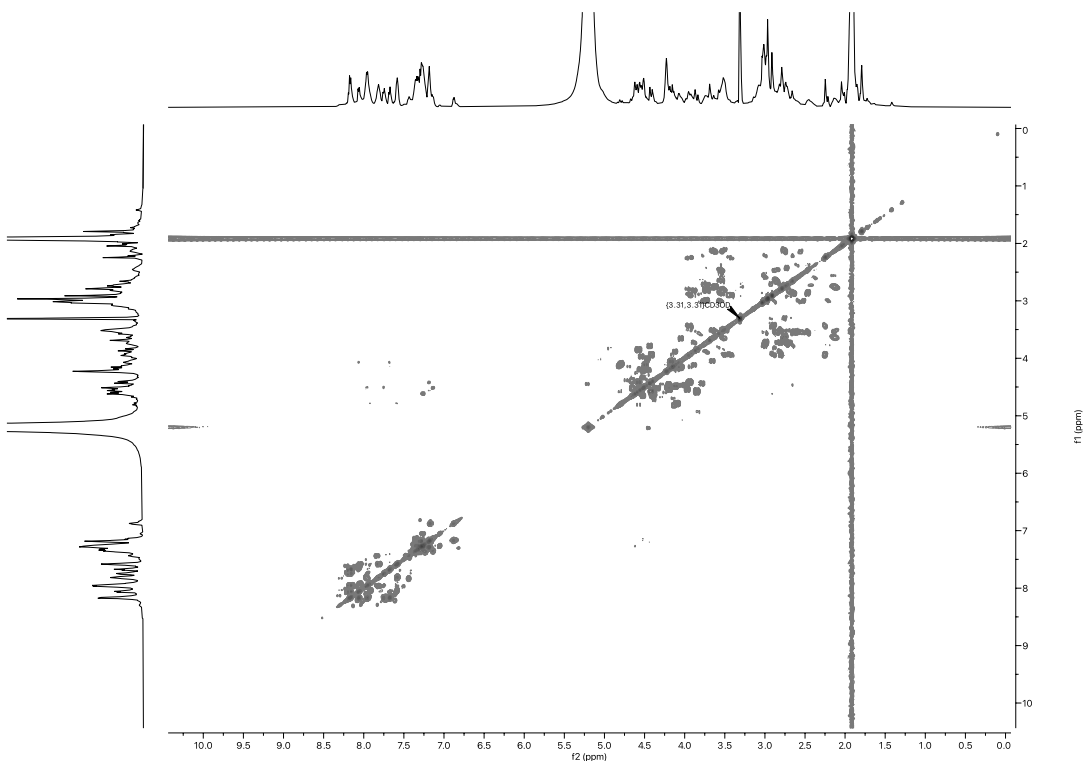

**Figure S199** The  $^1\text{H}$ - $^1\text{H}$  COSY NMR spectrum of  $[\text{Sc}(\text{L}^{012})]^+$  in MeOD.

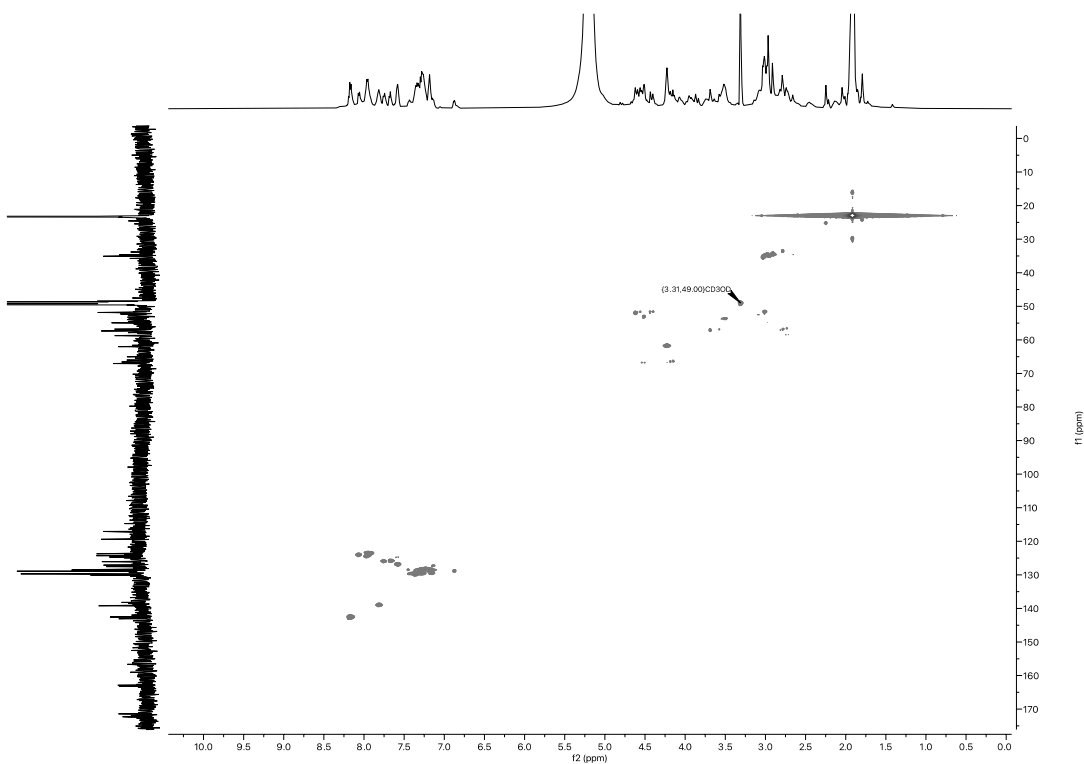

**Figure S200** The  $^1\text{H}$ - $^{13}\text{C}$  HSQC NMR spectrum of  $[\text{Sc}(\text{L}^{012})]^+$  in MeOD.

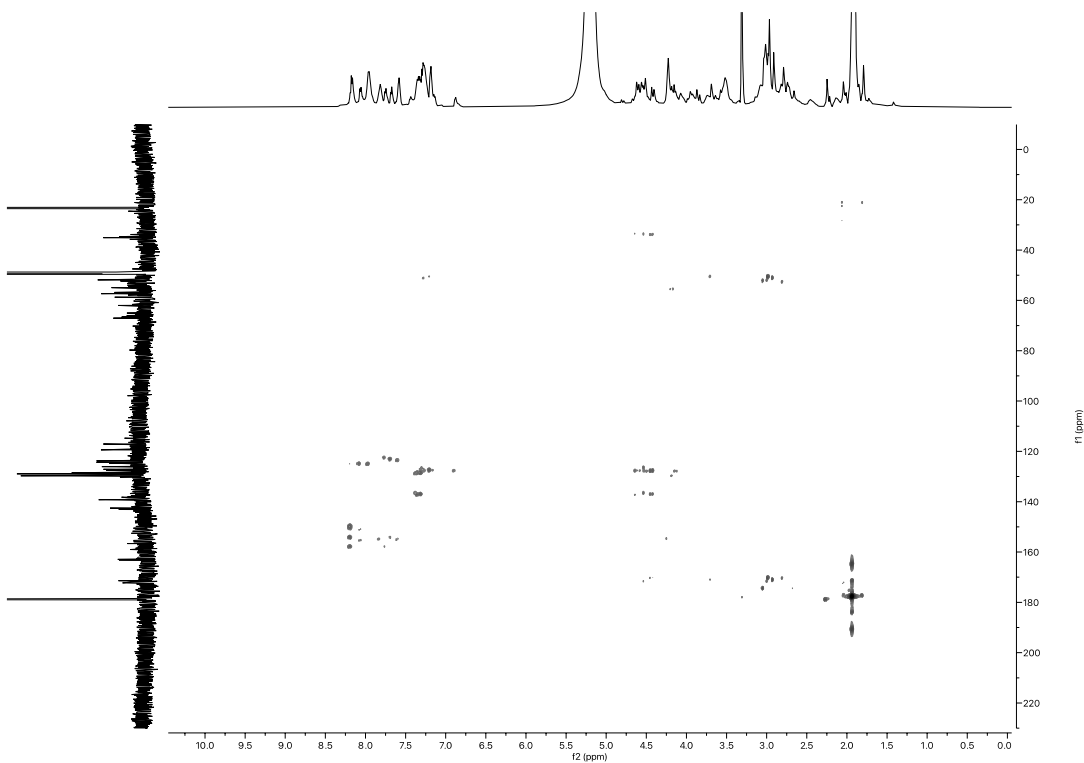

Figure S201 The  $^1\text{H}$ - $^{13}\text{C}$  HMBC NMR spectrum of  $[\text{Sc}(\text{L}^{012})]^+$  in MeOD.

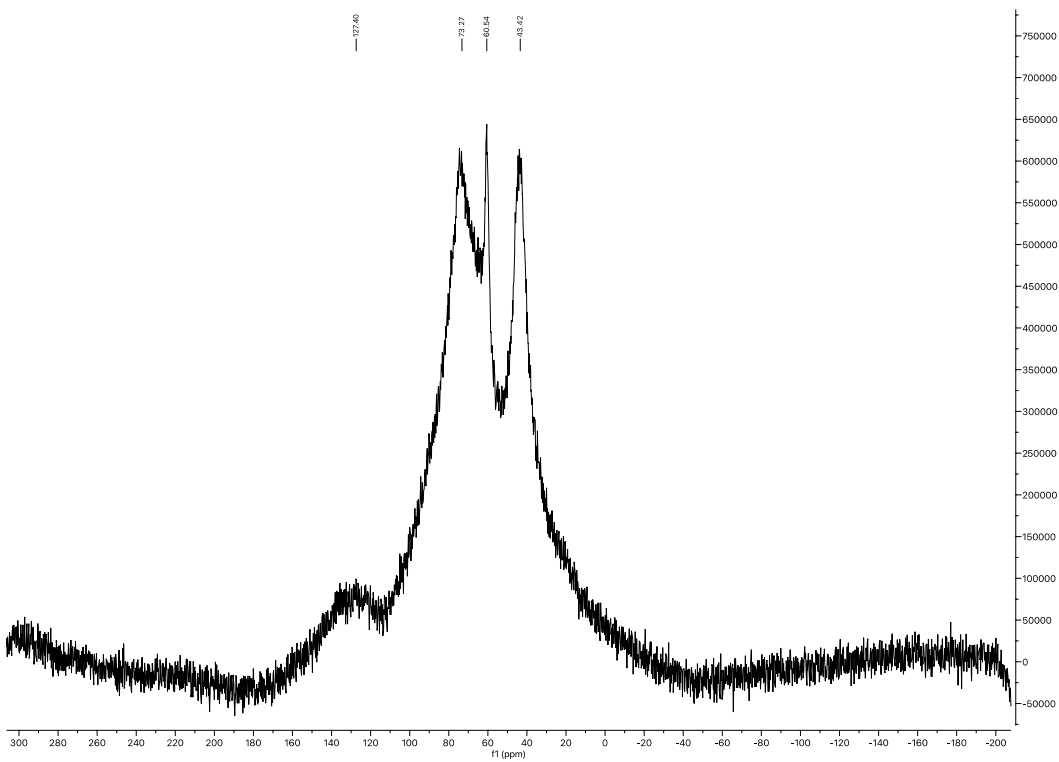

Figure S202 The  $^{45}\text{Sc}$  NMR spectrum of  $[\text{Sc}(\text{L}^{012})]^+$  in MeOD.

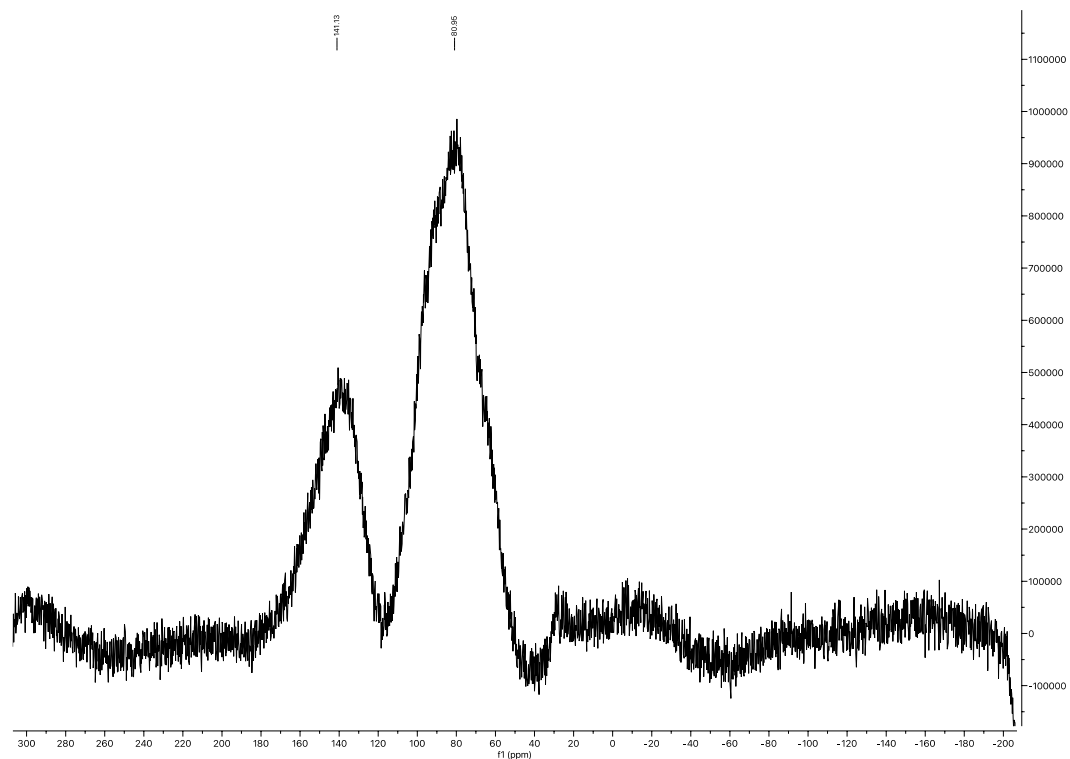

Figure S203 The  $^{45}\text{Sc}$  NMR spectrum of  $[\text{Sc}(\text{L}^{012})]^+$  in  $\text{D}_2\text{O}$ .

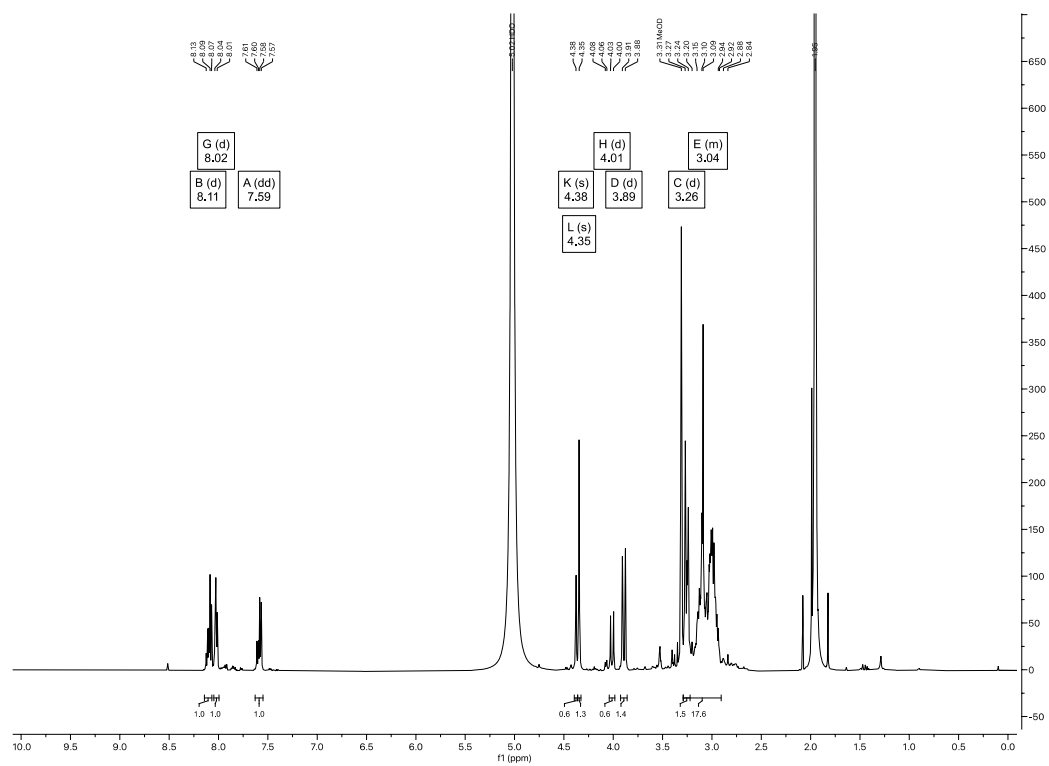

Figure S204 The  $^1\text{H}$  NMR spectrum of  $[\text{ScF}(\text{L}^{201})]^-$  in  $\text{MeOD}$ .

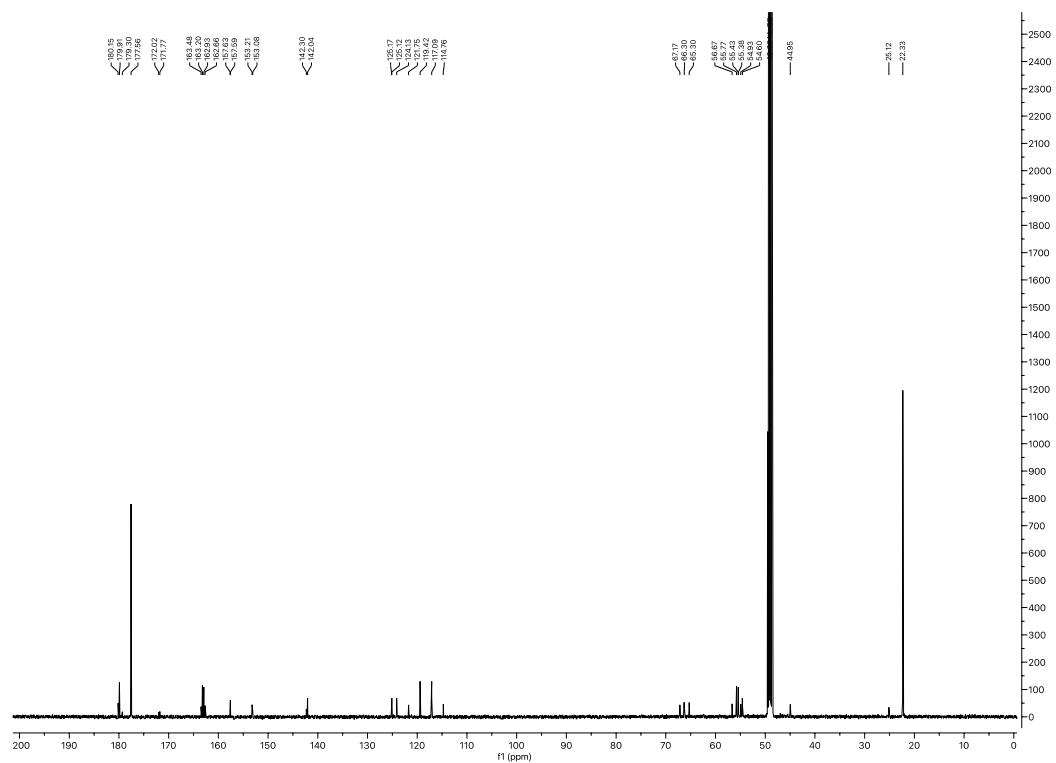

**Figure S205** The  $^{13}\text{C}\{^1\text{H}\}$  NMR spectrum of  $[\text{ScF}(\text{L}^{201})]^-$  in MeOD.

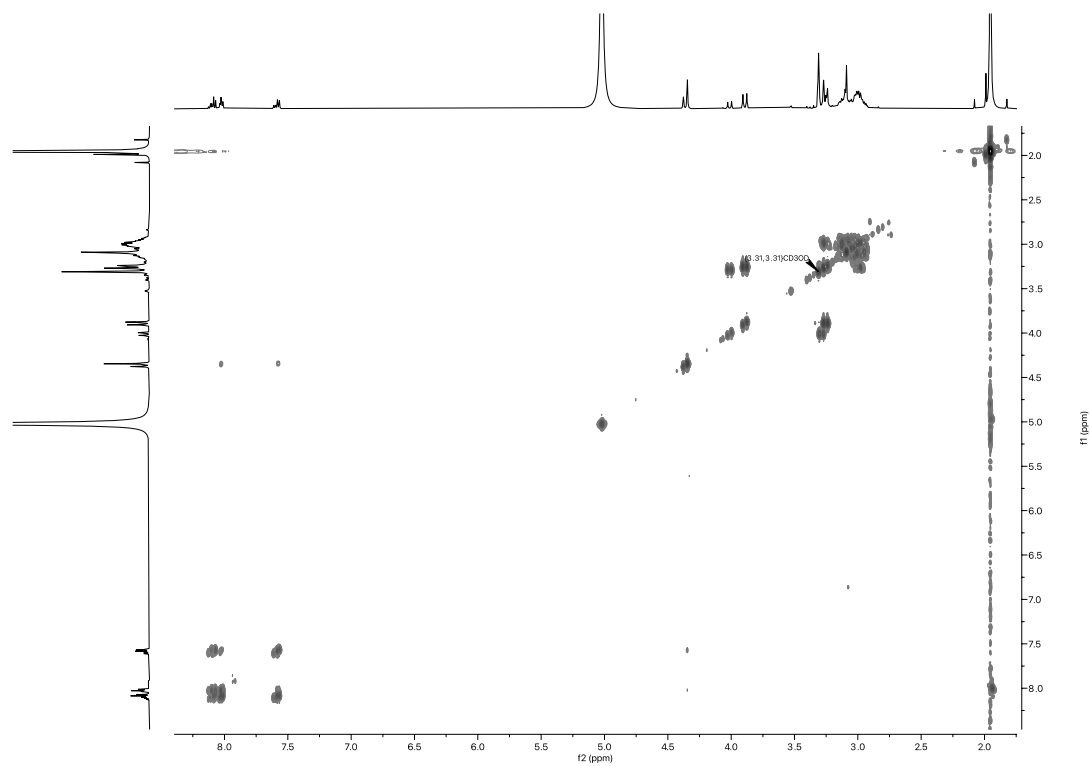

**Figure S206** The  $^1\text{H}-^1\text{H}$  COSY NMR spectrum of  $[\text{ScF}(\text{L}^{201})]^-$  in MeOD.

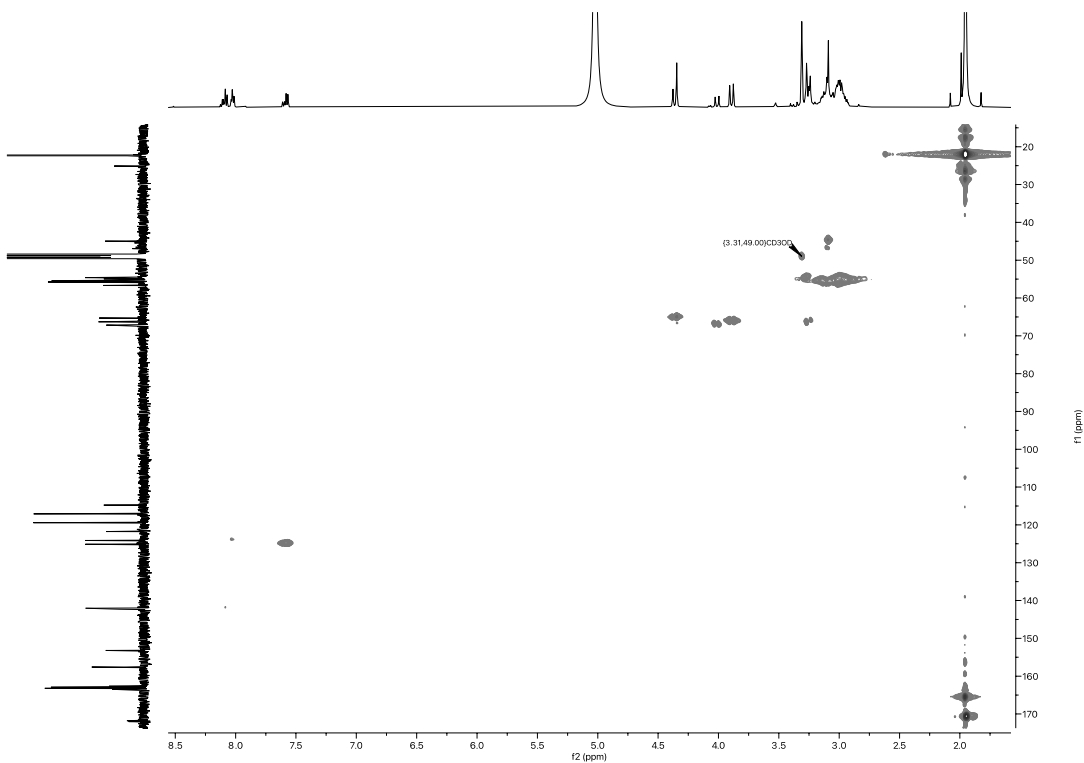

Figure S207 The  $^1\text{H}$ - $^{13}\text{C}$  HSQC NMR spectrum of  $[\text{ScF}(\text{L}^{201})]^-$  in MeOD.

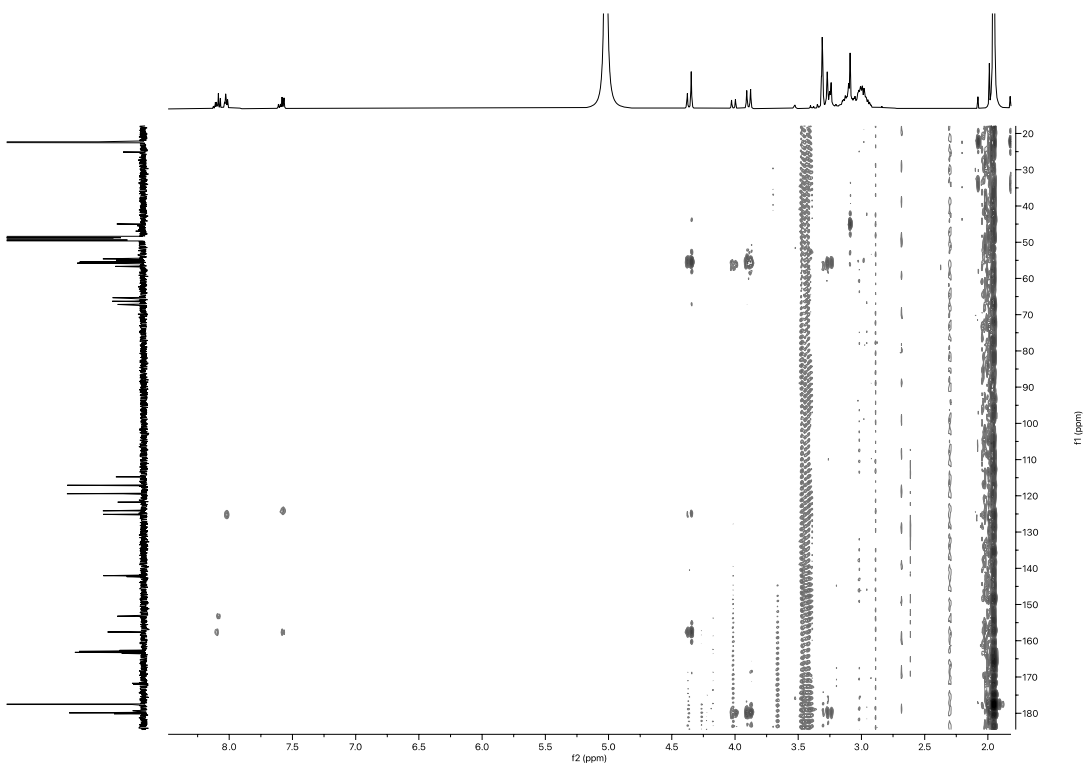

Figure S208 The  $^1\text{H}$ - $^{13}\text{C}$  HMBC NMR spectrum of  $[\text{ScF}(\text{L}^{201})]^-$  in MeOD.

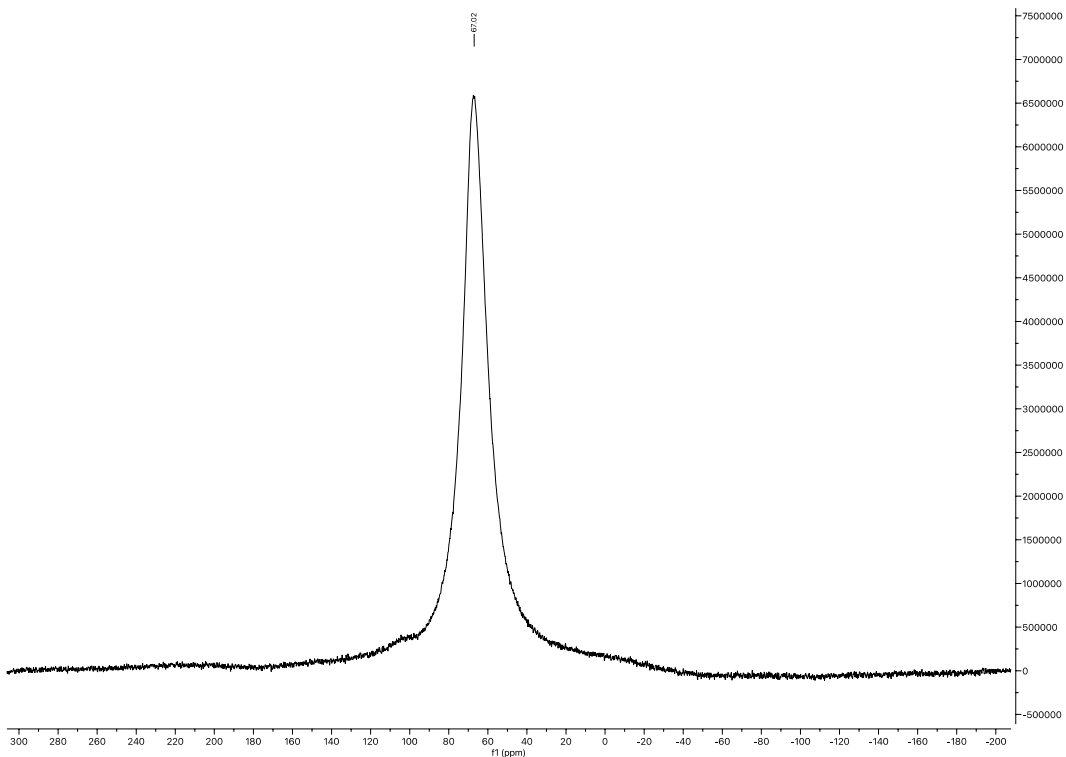

**Figure S209** The  $^{45}\text{Sc}$  NMR spectrum of  $[\text{ScF}(\text{L}^{201})]^-$  in MeOD.

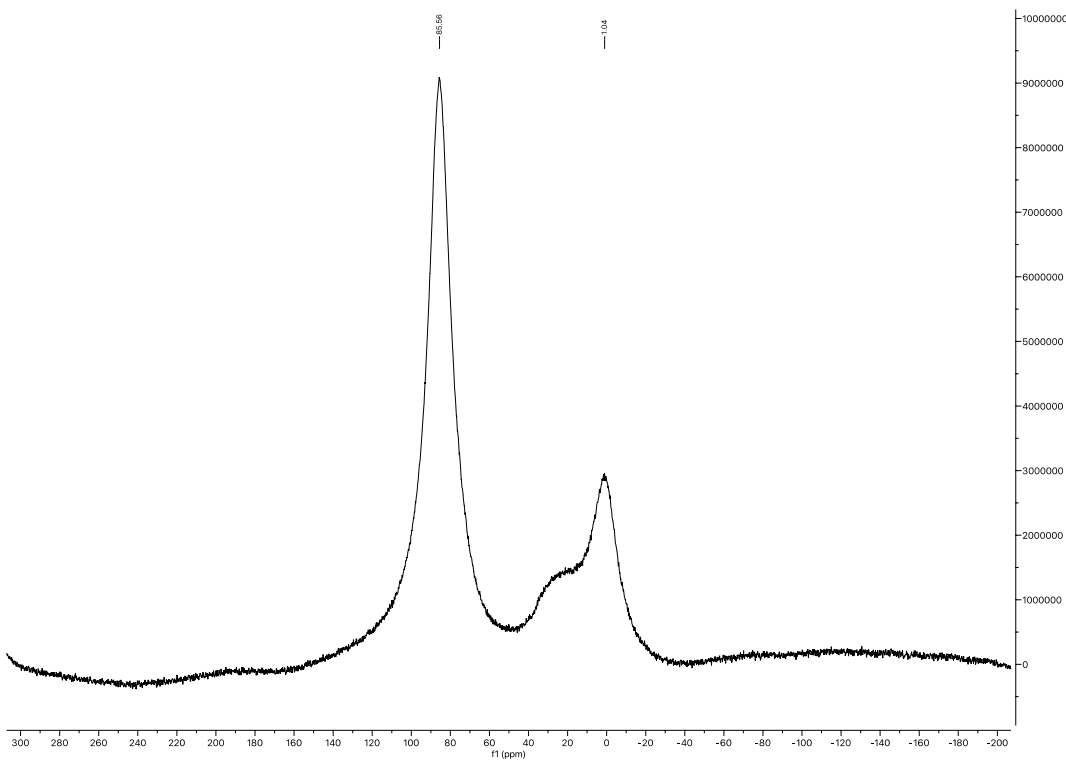

**Figure S210** The  $^{45}\text{Sc}$  NMR spectrum of  $[\text{ScF}(\text{L}^{201})]^-$  in  $\text{D}_2\text{O}$ .



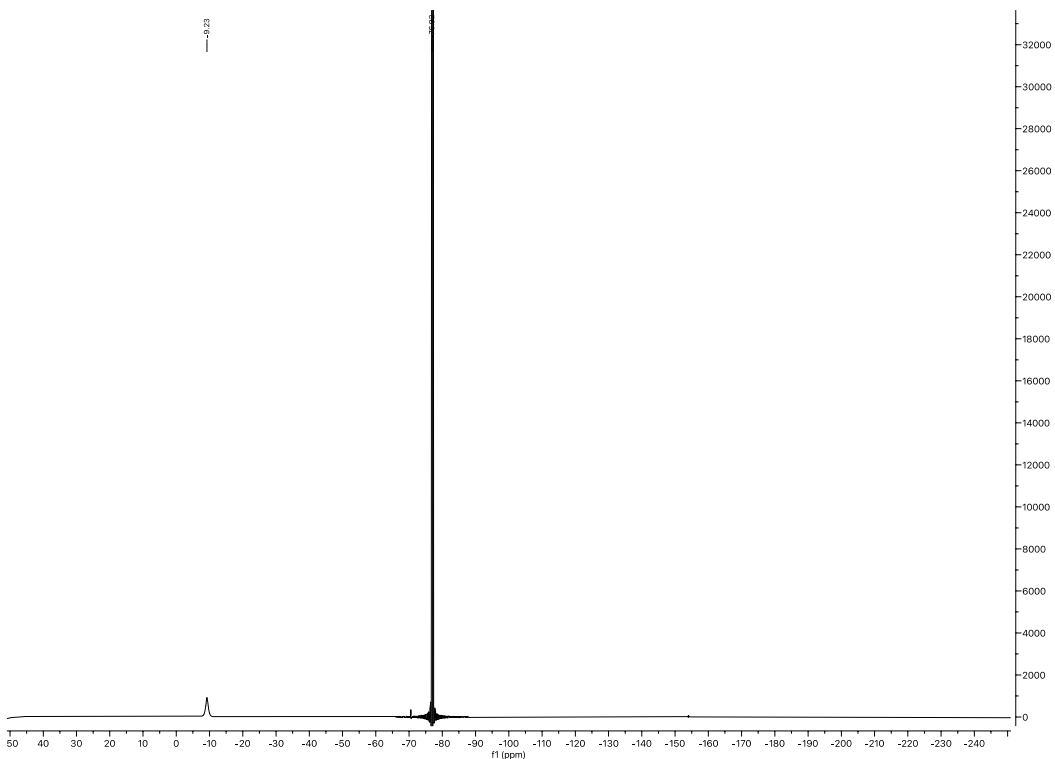

Figure S211 The  $^{19}\text{F}$  NMR spectrum of  $[\text{ScF}(\text{L}^{201})]^-$  in MeOD.

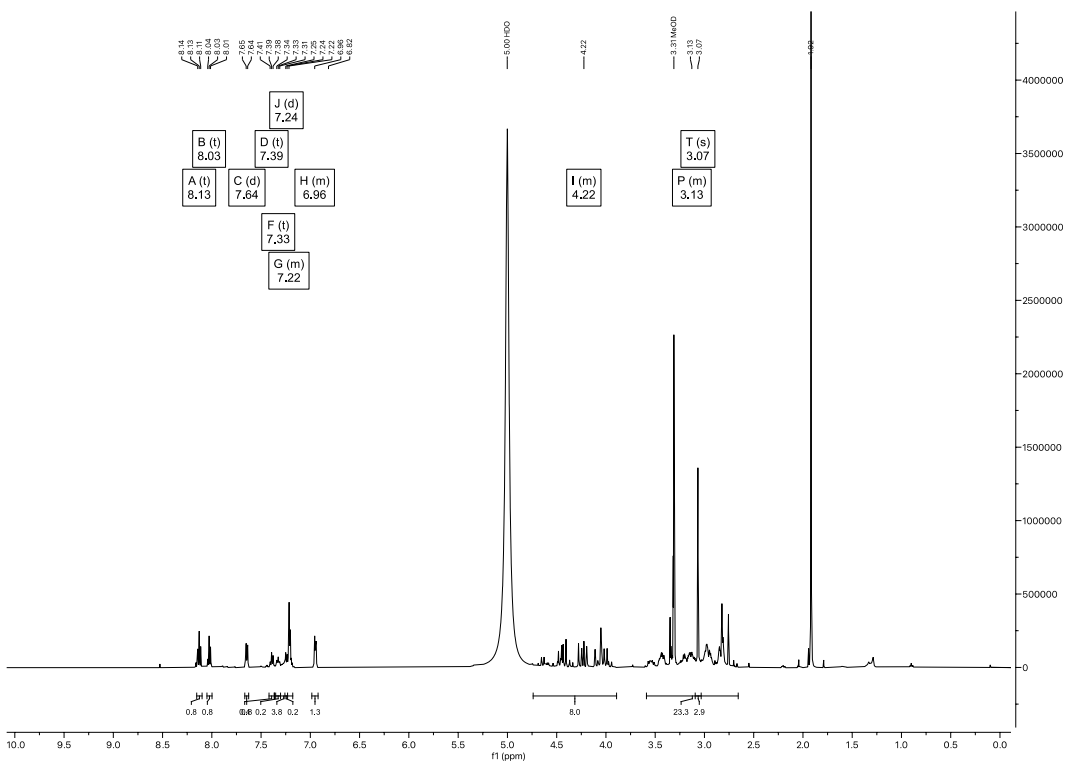

Figure S212 The  $^1\text{H}$  NMR spectrum of  $[\text{ScF}(\text{L}^{11})]$  in MeOD.

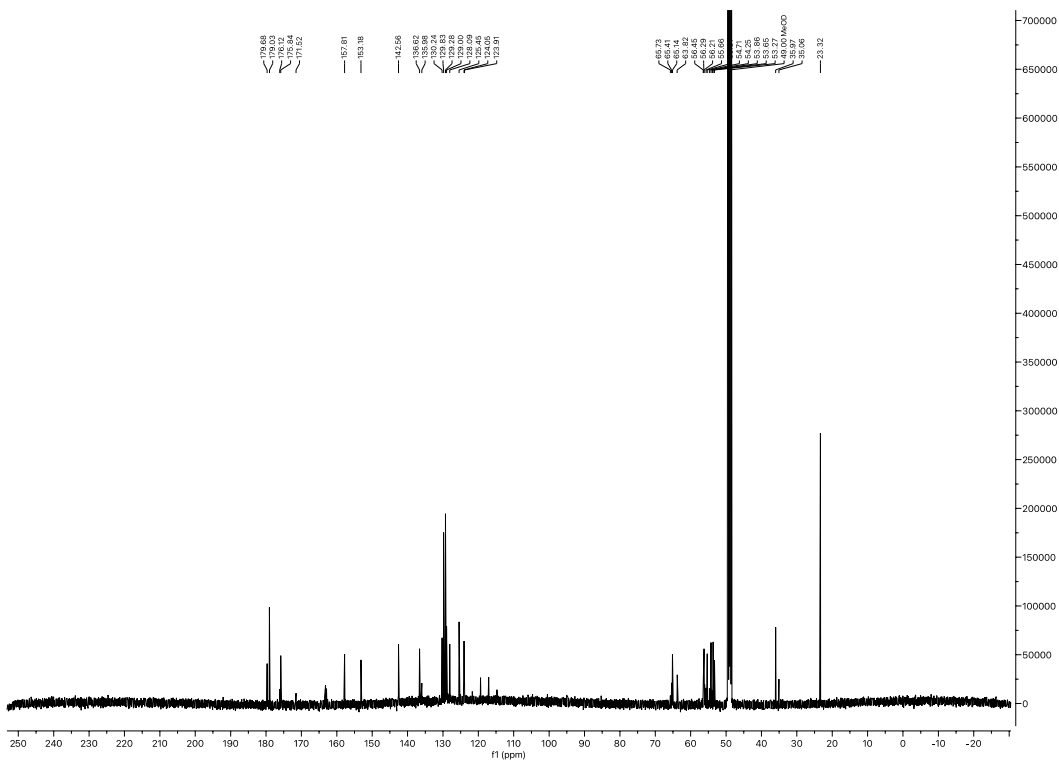

Figure S213 The  $^{13}\text{C}\{^1\text{H}\}$  NMR spectrum of  $[\text{ScF}(\text{L}^{111})]$  in MeOD.

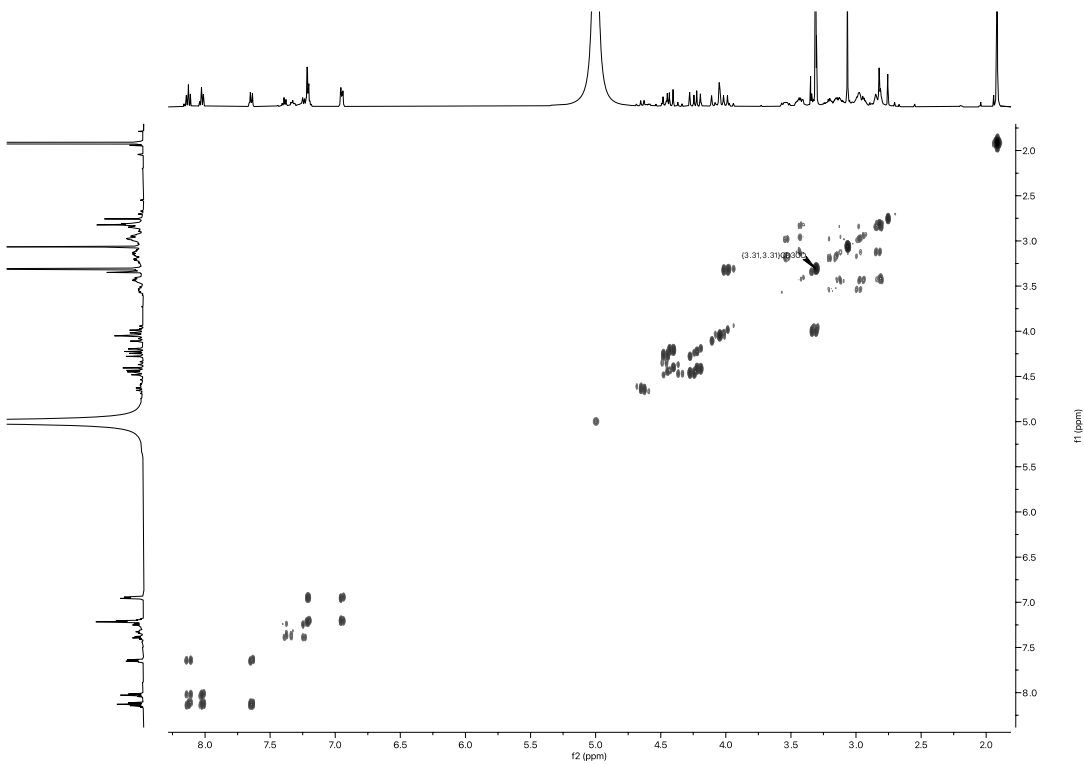

Figure S214 The  $^1\text{H}\text{-}^1\text{H}$  COSY NMR spectrum of  $[\text{ScF}(\text{L}^{111})]$  in MeOD.

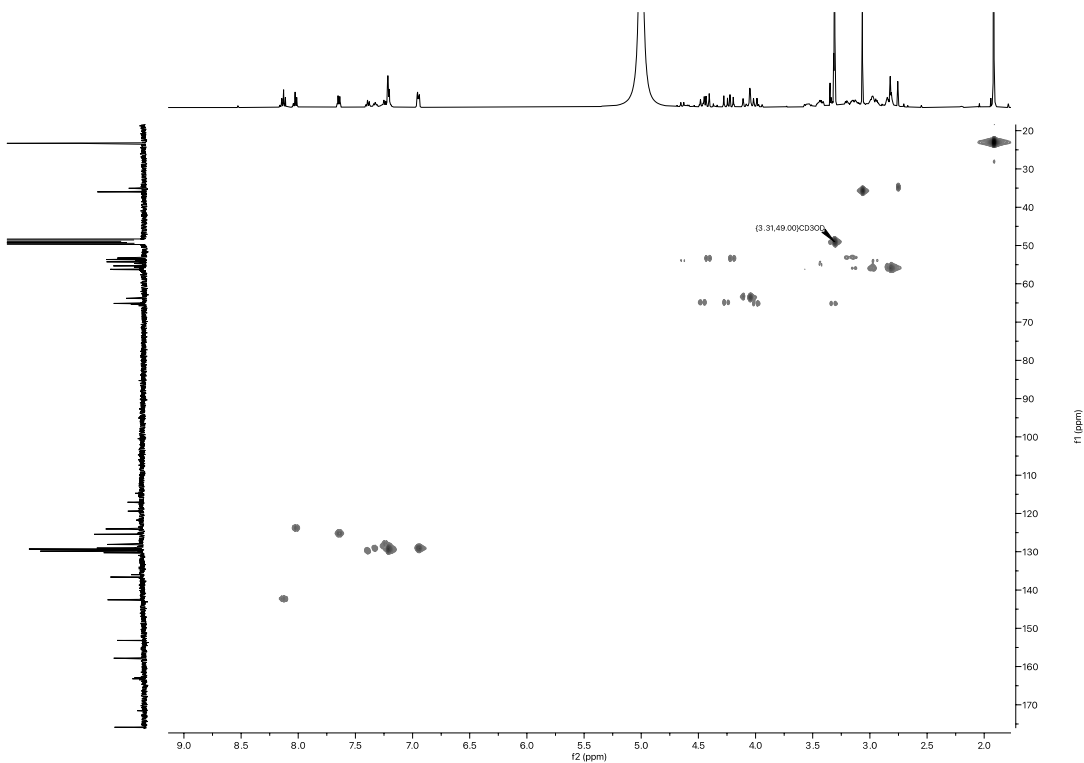

**Figure S215** The  $^1\text{H}$ - $^{13}\text{C}$  HSQC NMR spectrum of  $[\text{ScF}(\text{L}^{111})]$  in MeOD.

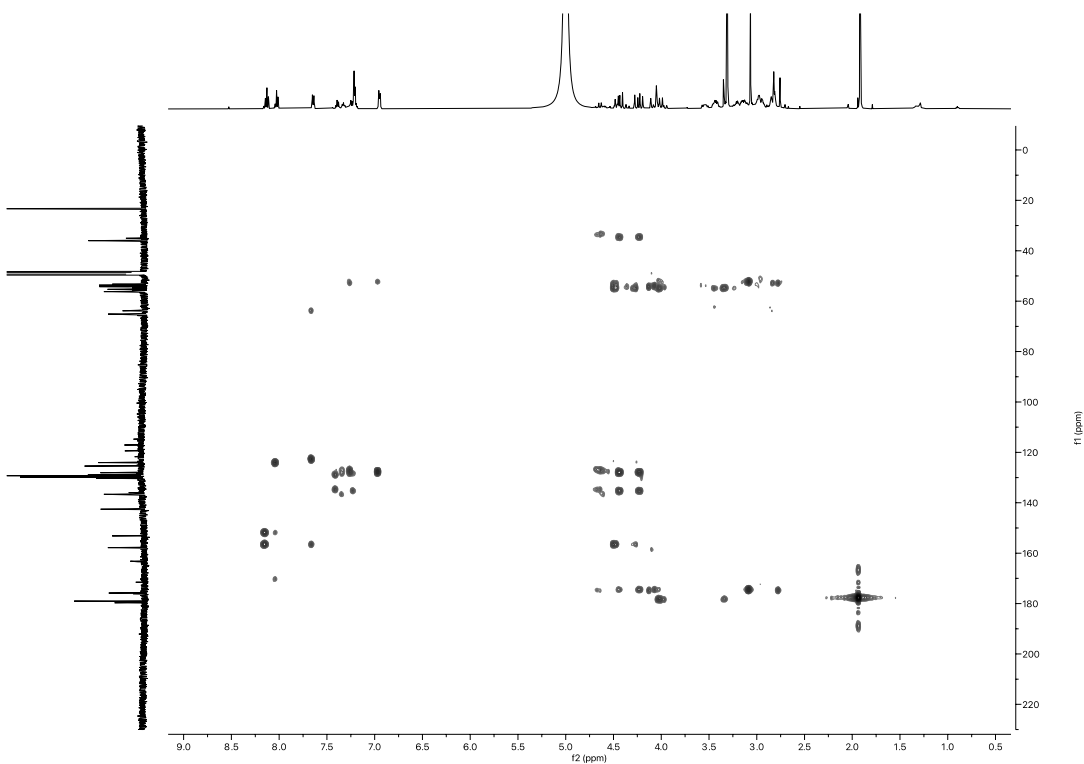

**Figure S216** The  $^1\text{H}$ - $^{13}\text{C}$  HMBC NMR spectrum of  $[\text{ScF}(\text{L}^{111})]$  in MeOD.

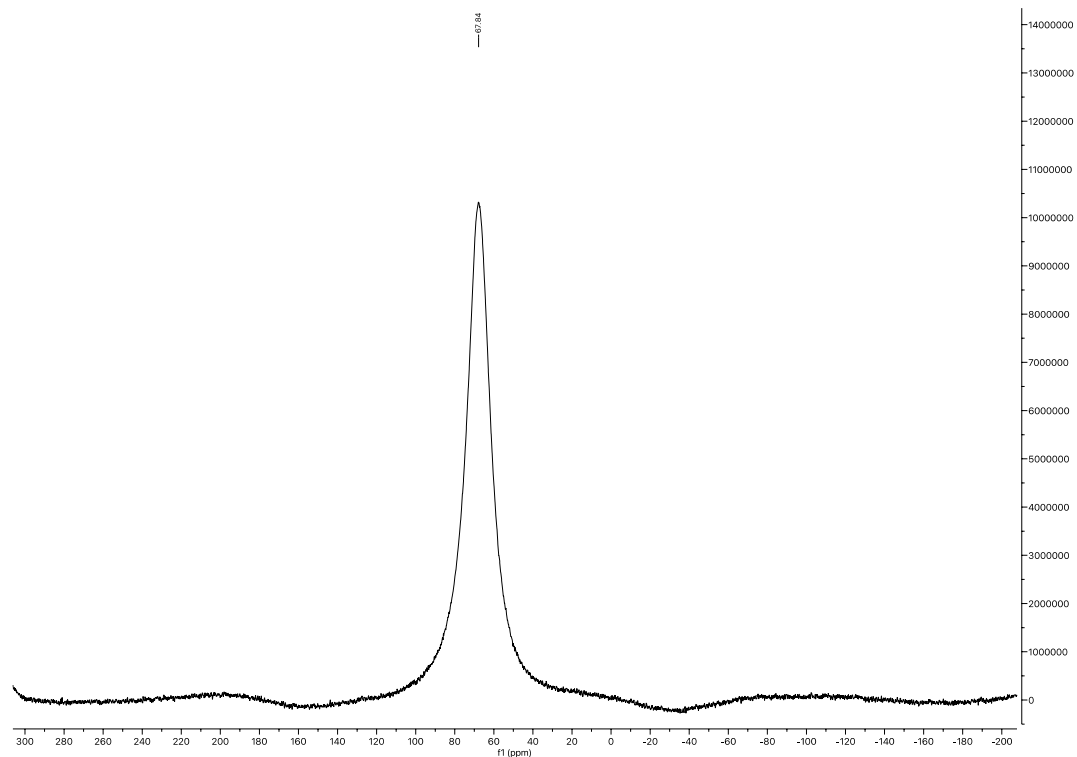

**Figure S217** The  $^{45}\text{Sc}$  NMR spectrum of  $[\text{ScF}(\text{L}^{11})]$  in MeOD.

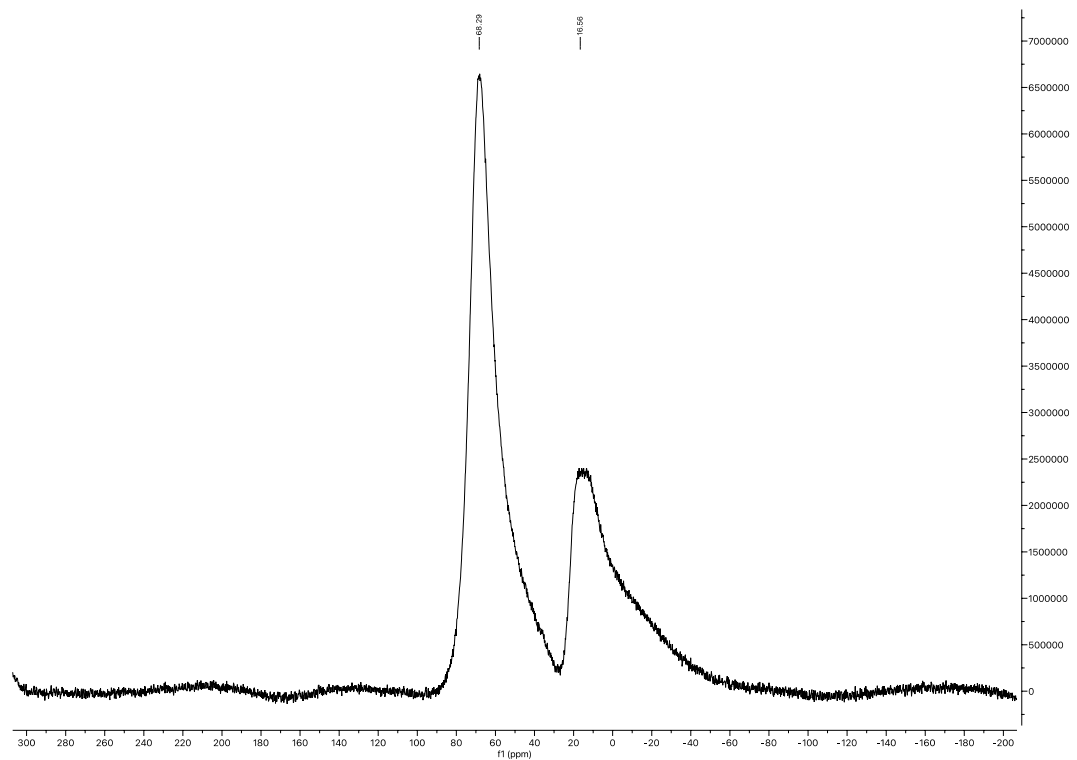

**Figure S218** The  $^{45}\text{Sc}$  NMR spectrum of  $[\text{ScF}(\text{L}^{11})]$  in  $\text{D}_2\text{O}$ .

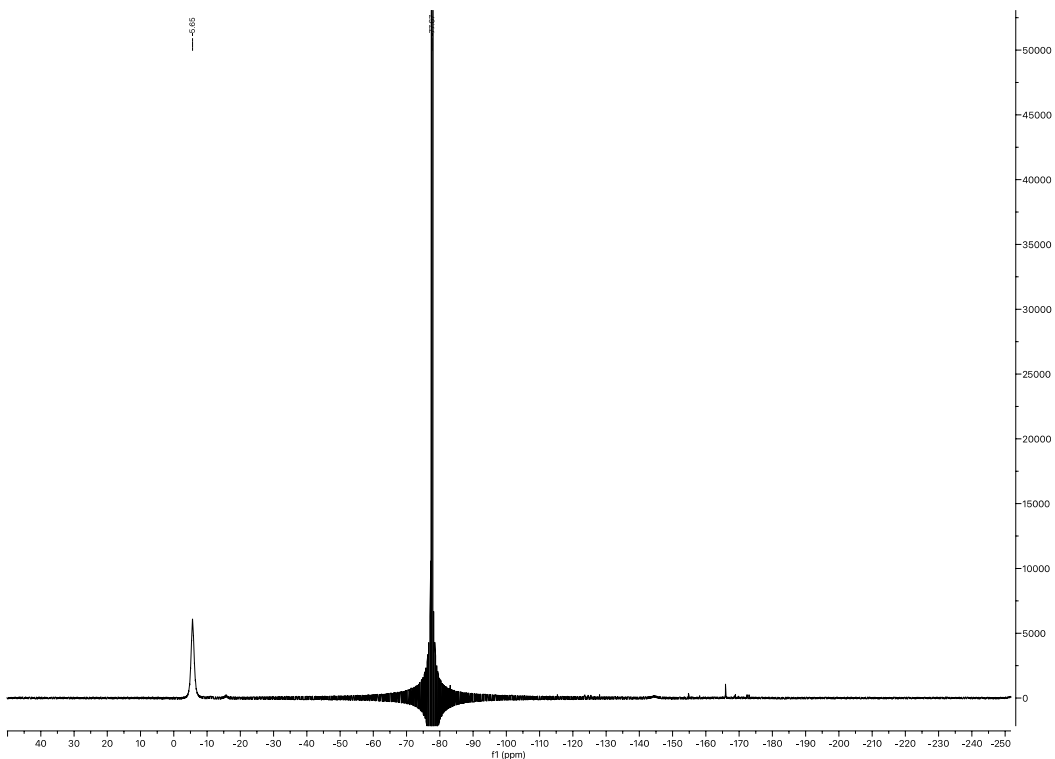

Figure S219 The  $^{19}\text{F}$  NMR spectrum of  $[\text{ScF}(\text{L}^{11})]$  in MeOD.

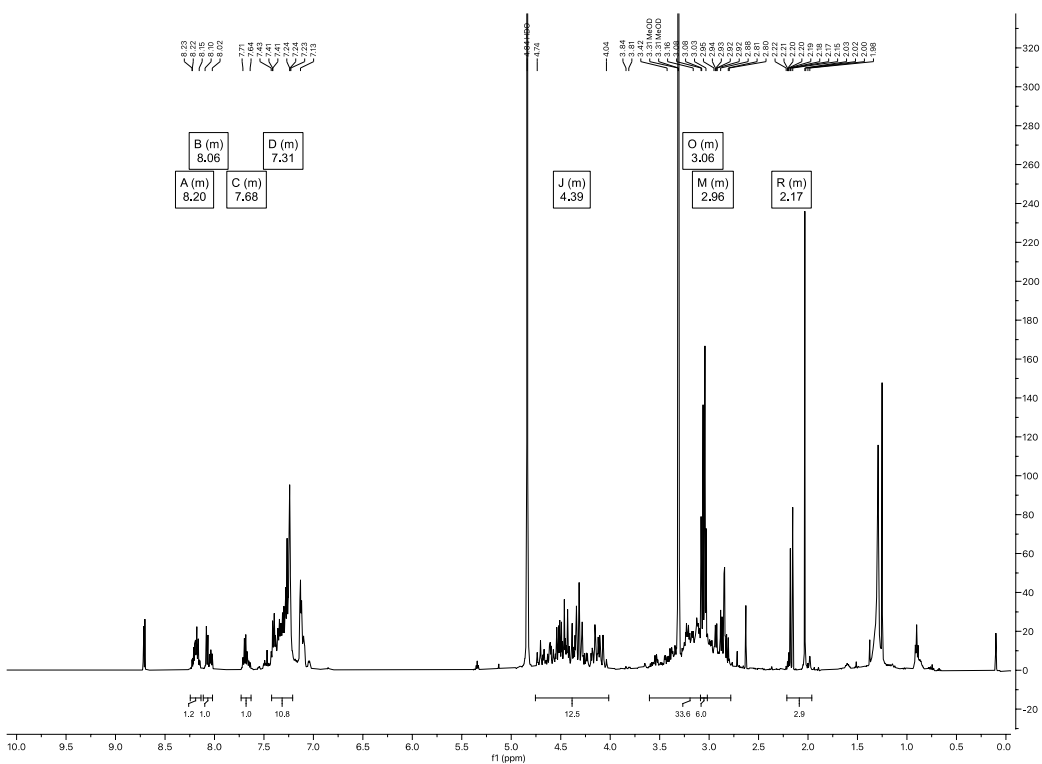

Figure S220 The  $^1\text{H}$  NMR spectrum of  $[\text{ScF}(\text{L}^{021})]^+$  in MeOD.

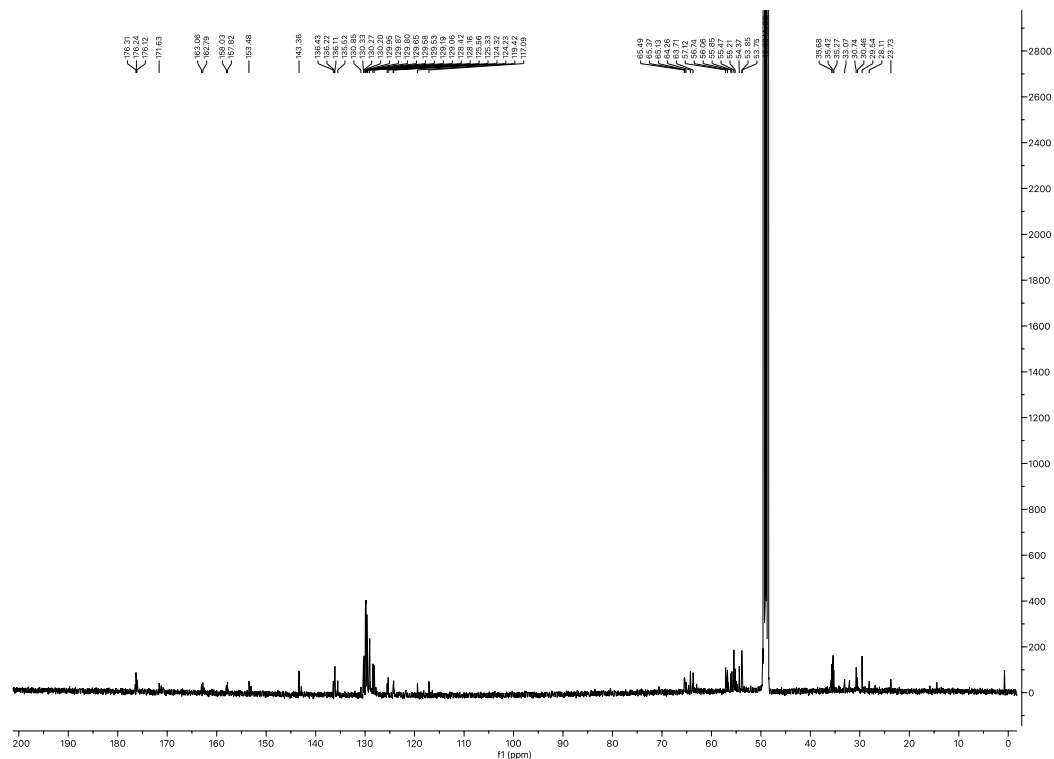

Figure S221 The  $^{13}\text{C}\{^1\text{H}\}$  NMR spectrum of  $[\text{ScF}(\text{L}^{021})]^+$  in MeOD.

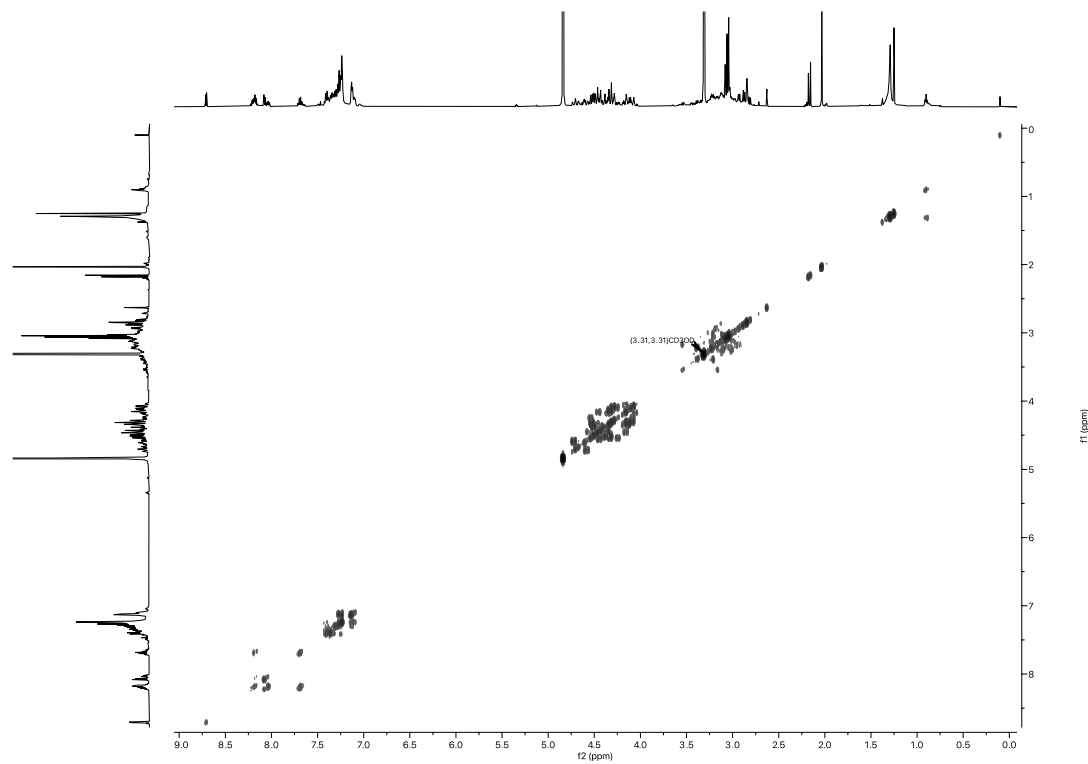

Figure S222 The  $^1\text{H}$ - $^1\text{H}$  COSY NMR spectrum of  $[\text{ScF}(\text{L}^{021})]^+$  in MeOD.

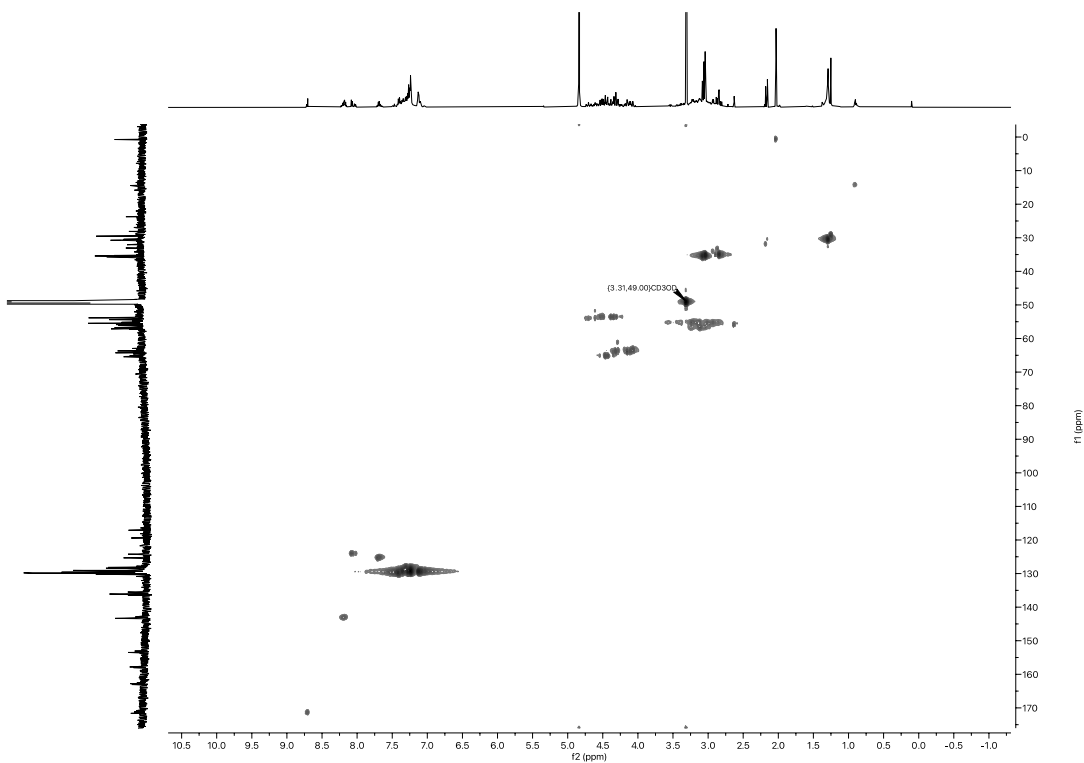

**Figure S223** The  $^1\text{H}$ - $^{13}\text{C}$  HSQC NMR spectrum of  $[\text{ScF}(\text{L}^{021})]^+$  in MeOD.

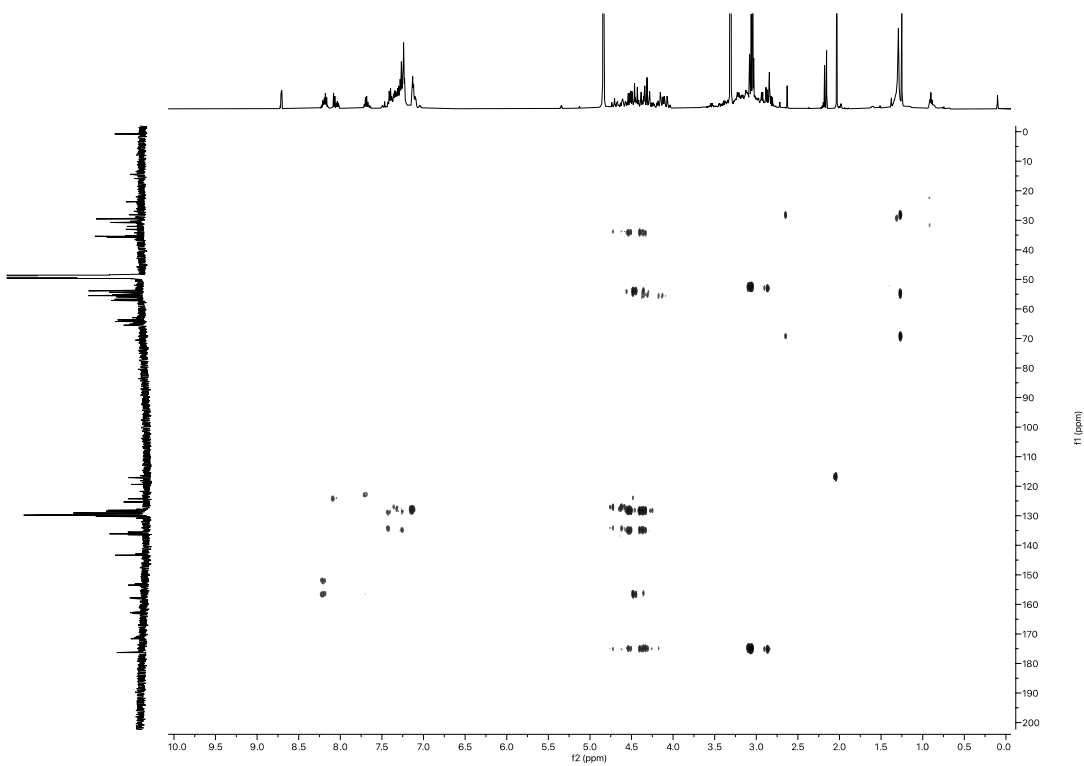

**Figure S224** The  $^1\text{H}$ - $^{13}\text{C}$  HMBC NMR spectrum of  $[\text{ScF}(\text{L}^{021})]^+$  in MeOD.

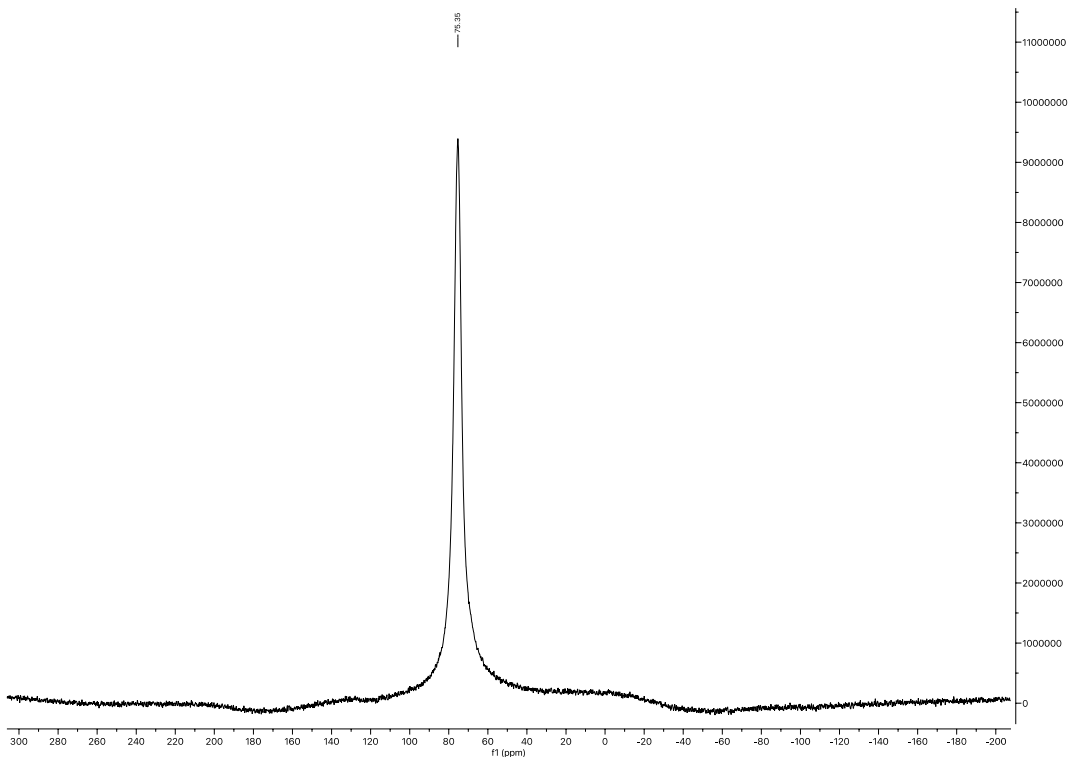

**Figure S225** The  $^{45}\text{Sc}$  NMR spectrum of  $[\text{ScF}(\text{L}^{021})]^+$  in MeOD.

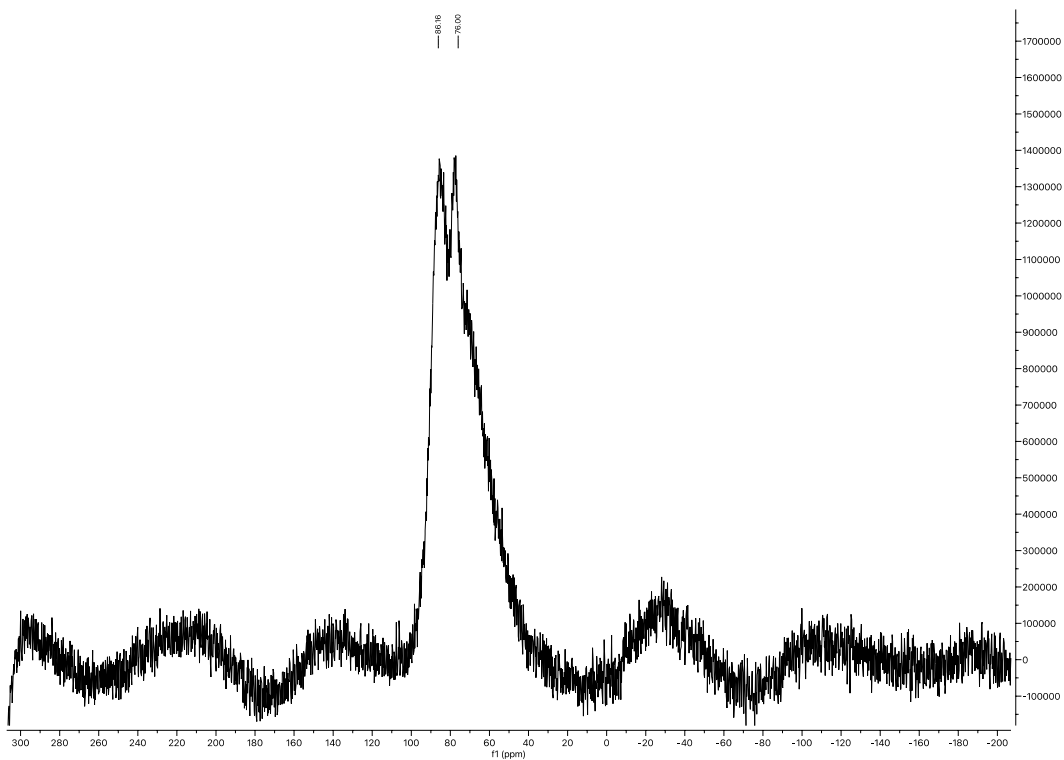

**Figure S226** The  $^{45}\text{Sc}$  NMR spectrum of  $[\text{ScF}(\text{L}^{021})]^+$  in  $\text{D}_2\text{O}$ .



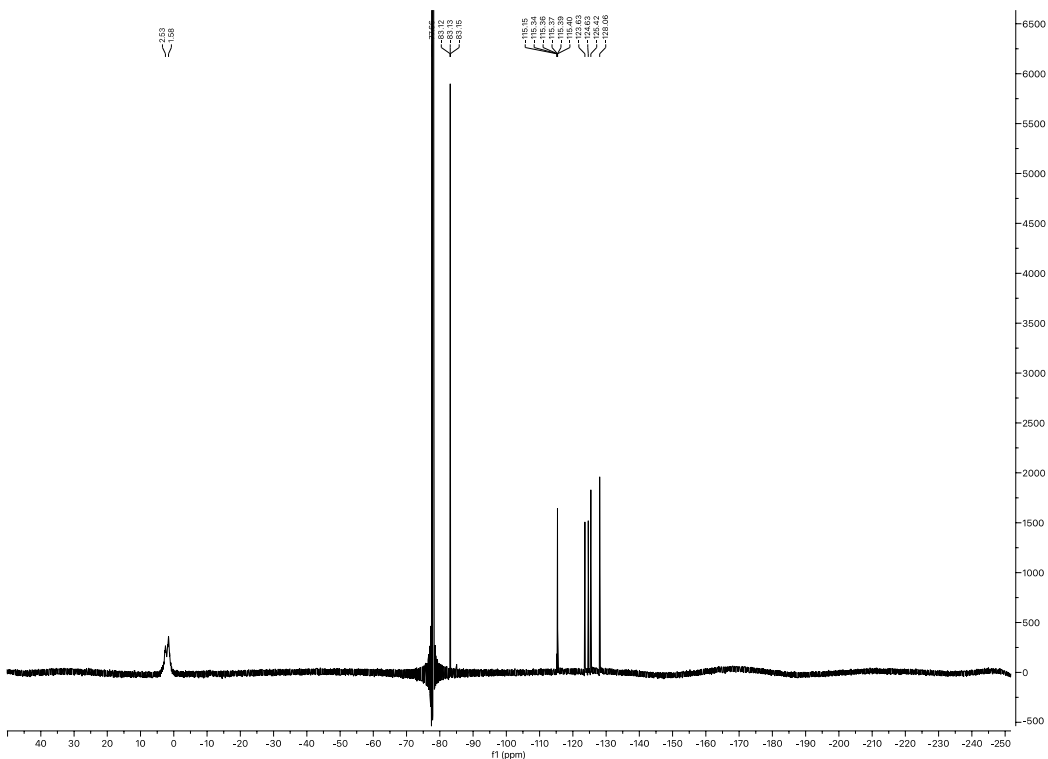

Figure S227 The  $^{19}\text{F}$  NMR spectrum of  $[\text{ScF}(\text{L}^{021})]^+$  in MeOD.

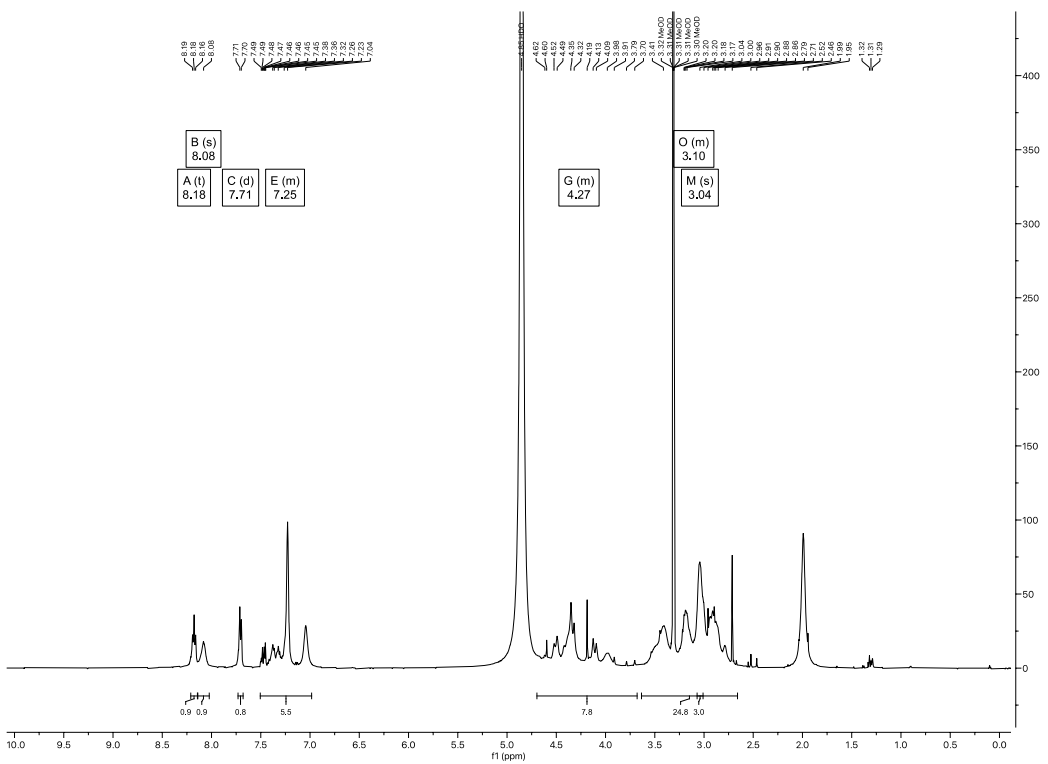

Figure S228 The  $^1\text{H}$  NMR spectrum of  $[\text{Lu}(\text{L}^{111})]^+$  in MeOD.

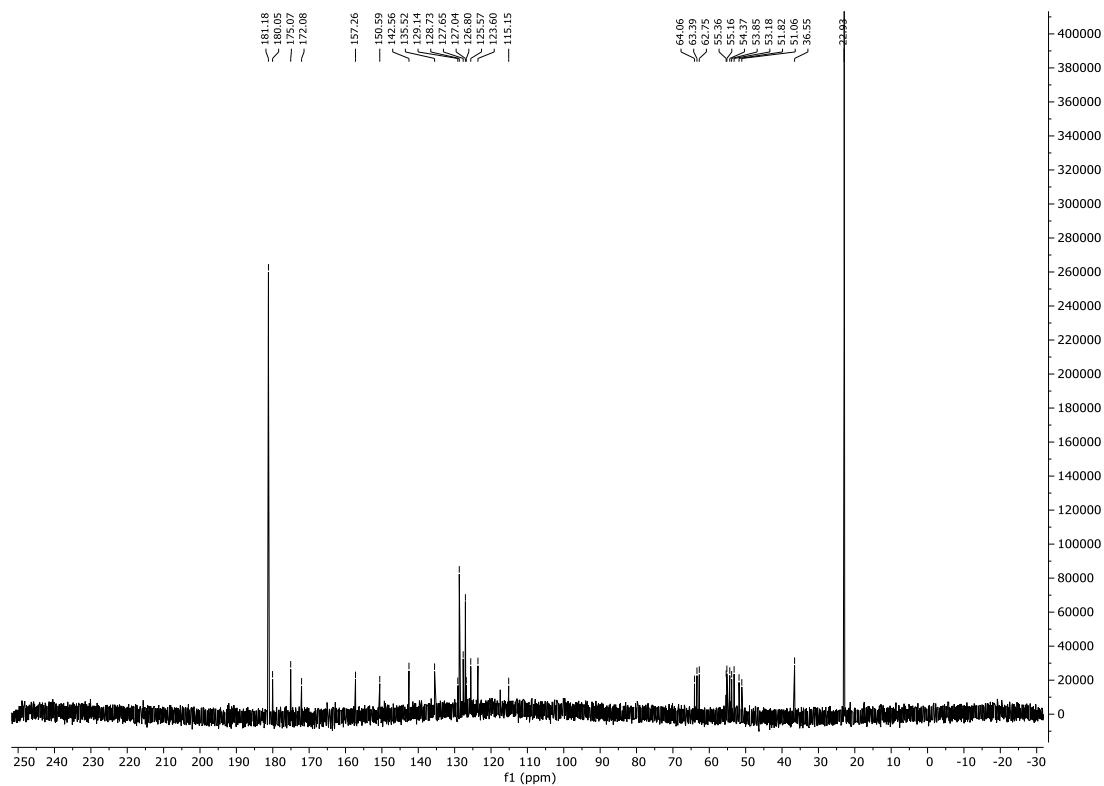

Figure S229 The  $^{13}\text{C}\{^1\text{H}\}$  NMR spectrum of  $[\text{Lu}(\text{L}^{111})]^+$  in MeOD.

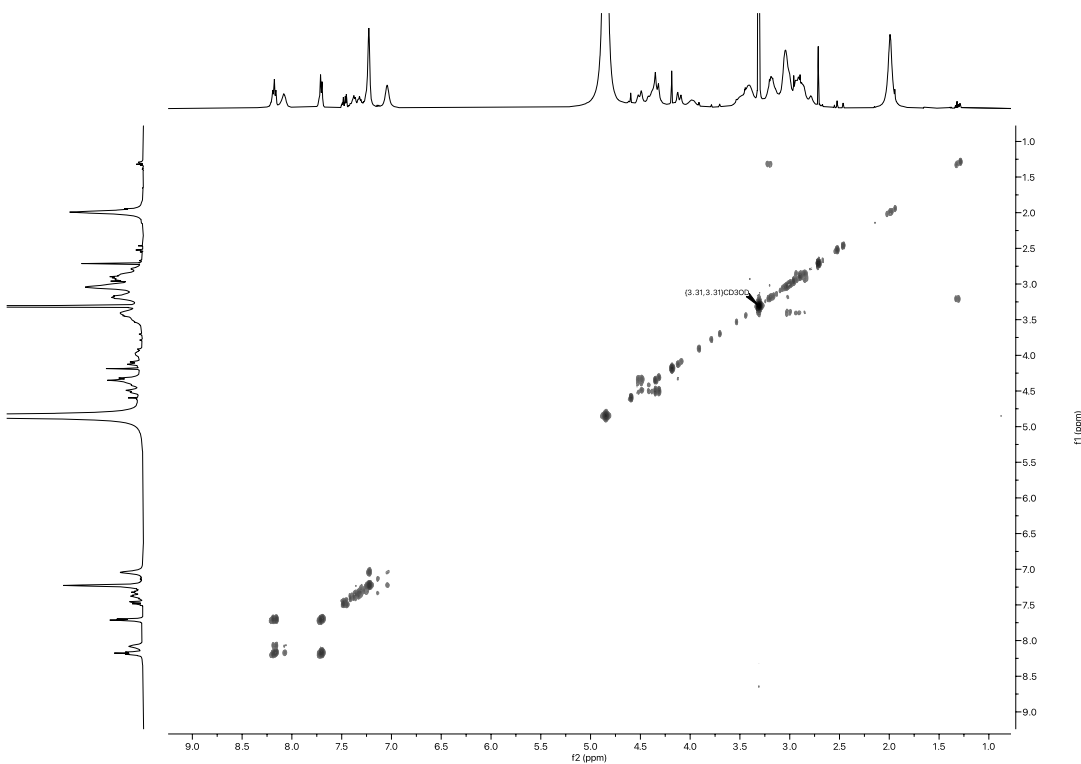

Figure S230 The  $^1\text{H}-^1\text{H}$  COSY NMR spectrum of  $[\text{Lu}(\text{L}^{111})]^+$  in MeOD.

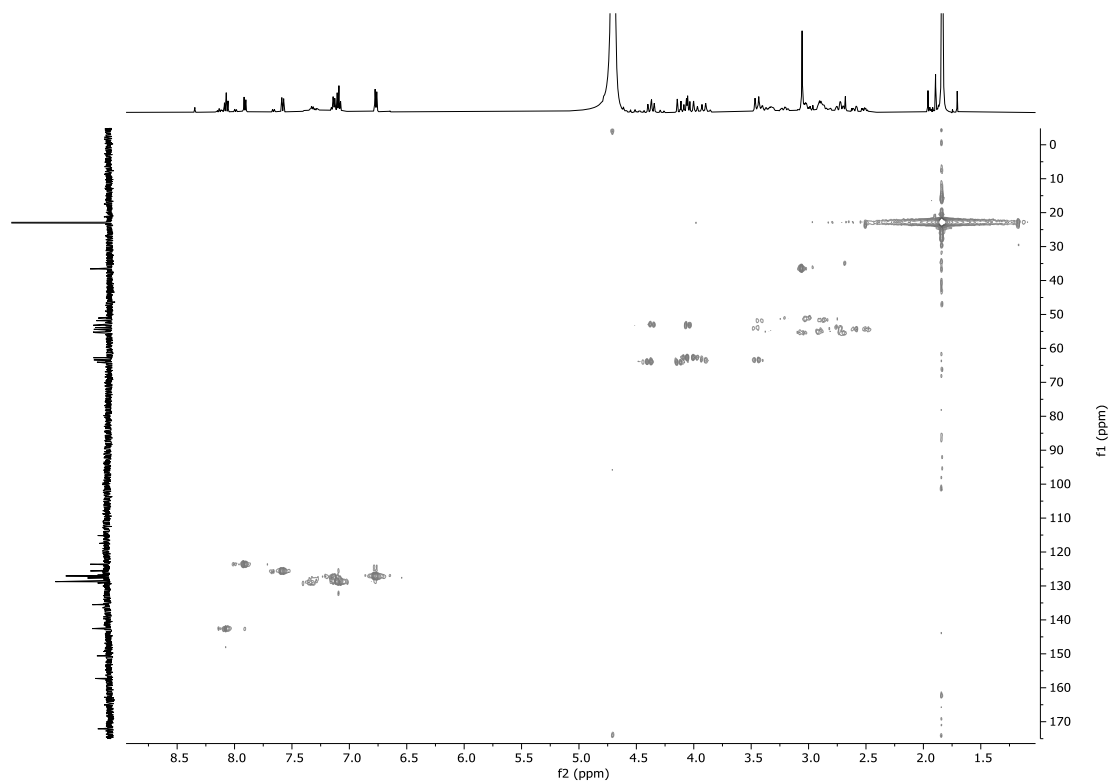

Figure S231 The  $^1\text{H}$ - $^{13}\text{C}$  HSQC NMR spectrum of  $[\text{Lu}(\text{L}^{111})]^+$  in MeOD.

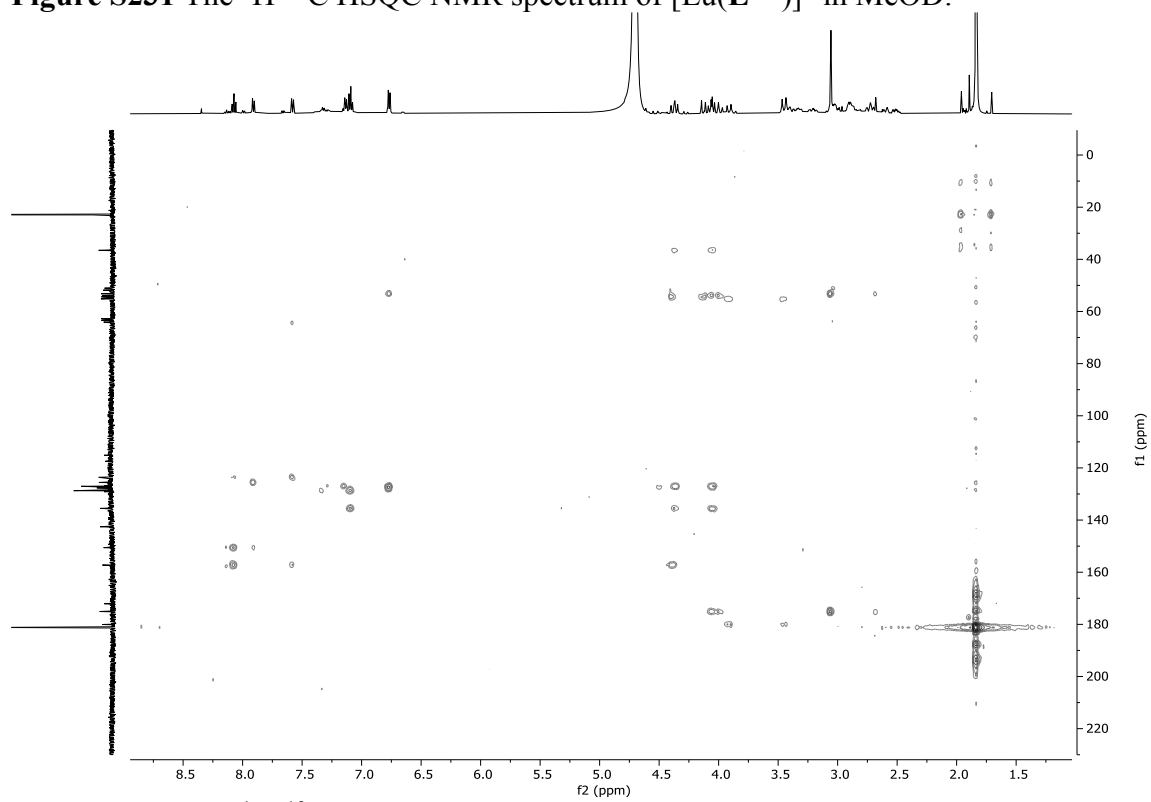

Figure S232 The  $^1\text{H}$ - $^{13}\text{C}$  HMBC NMR spectrum of  $[\text{Lu}(\text{L}^{111})]^+$  in MeOD.

## 2.2 HRMS

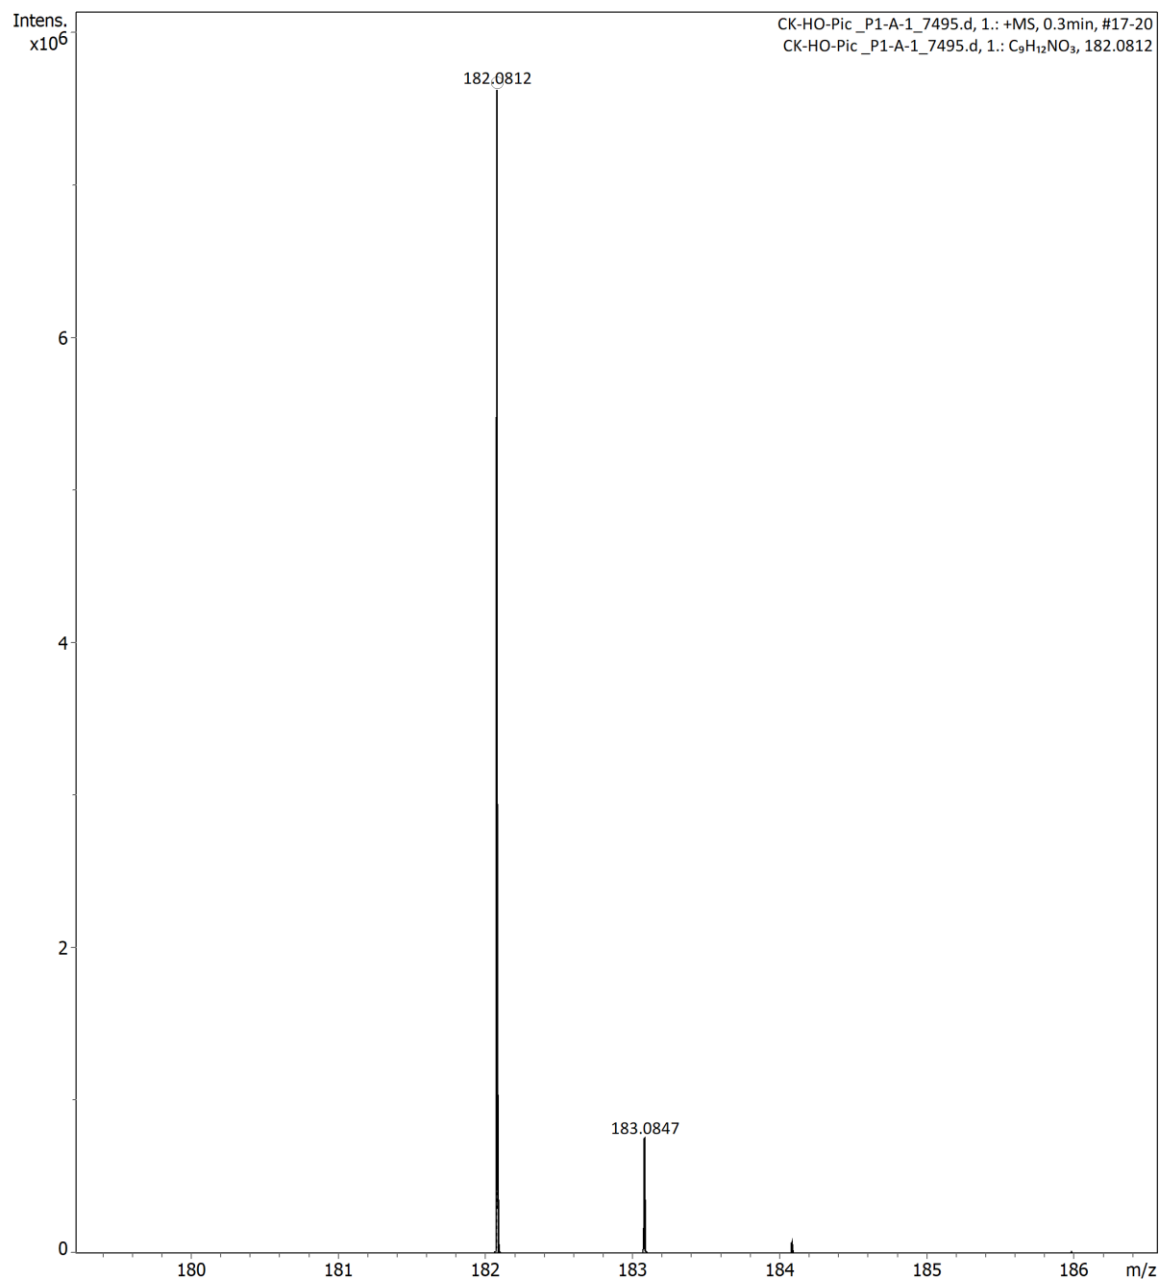

**Figure S233** ESI-HRMS of ethyl 6-(hydroxymethyl)picolinate.

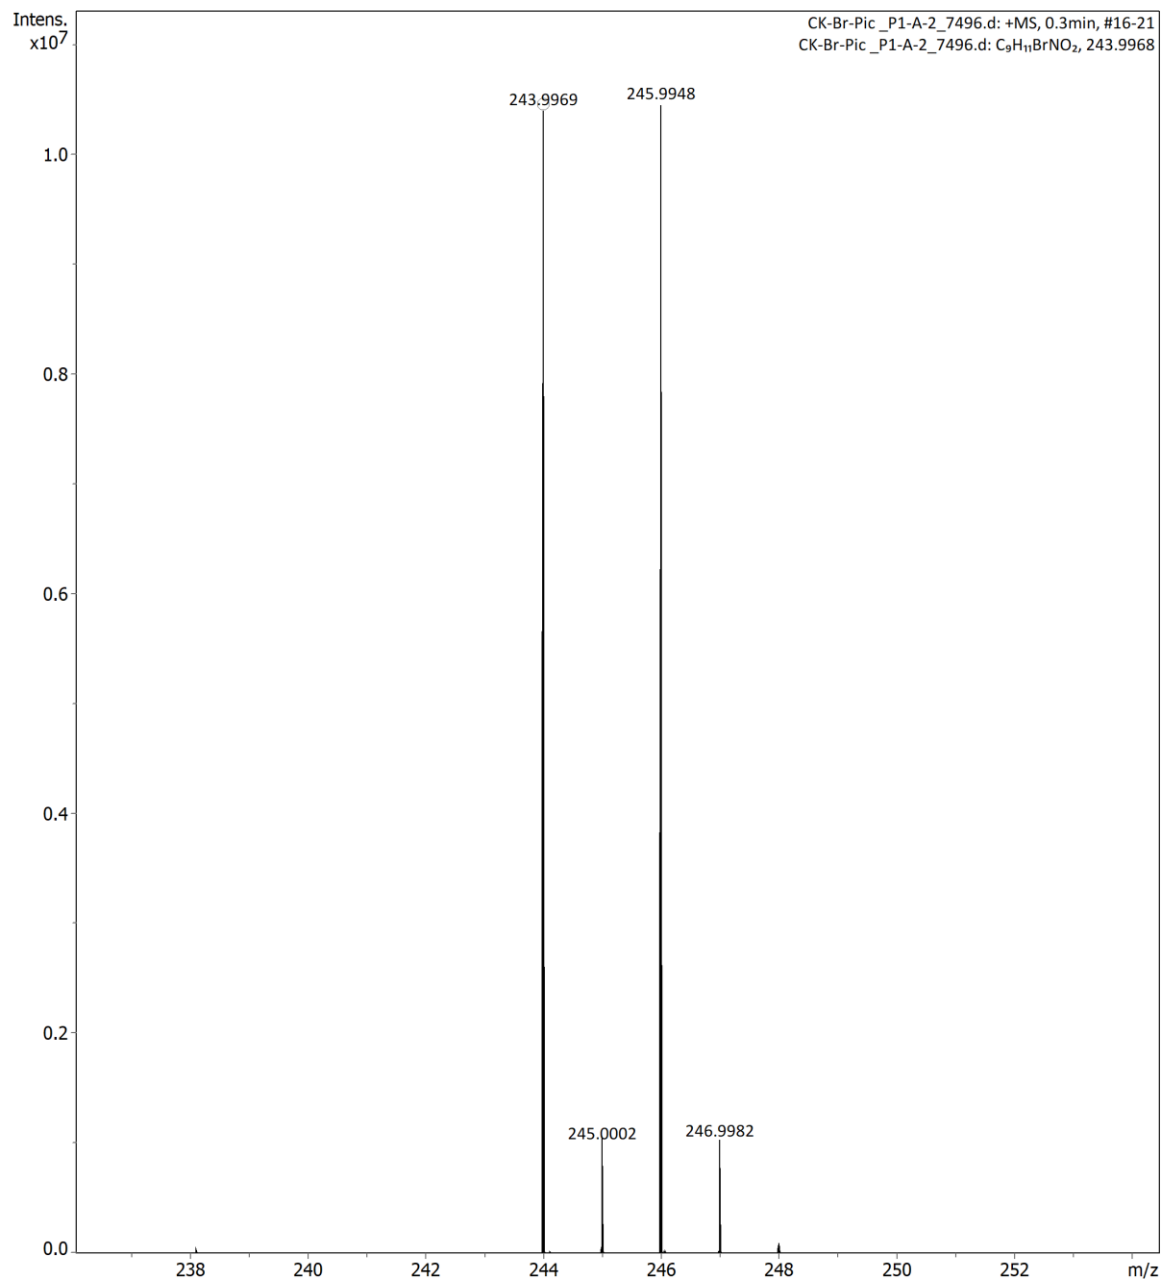

**Figure S234** ESI-HRMS of ethyl 6-(bromomethyl)picolinate.

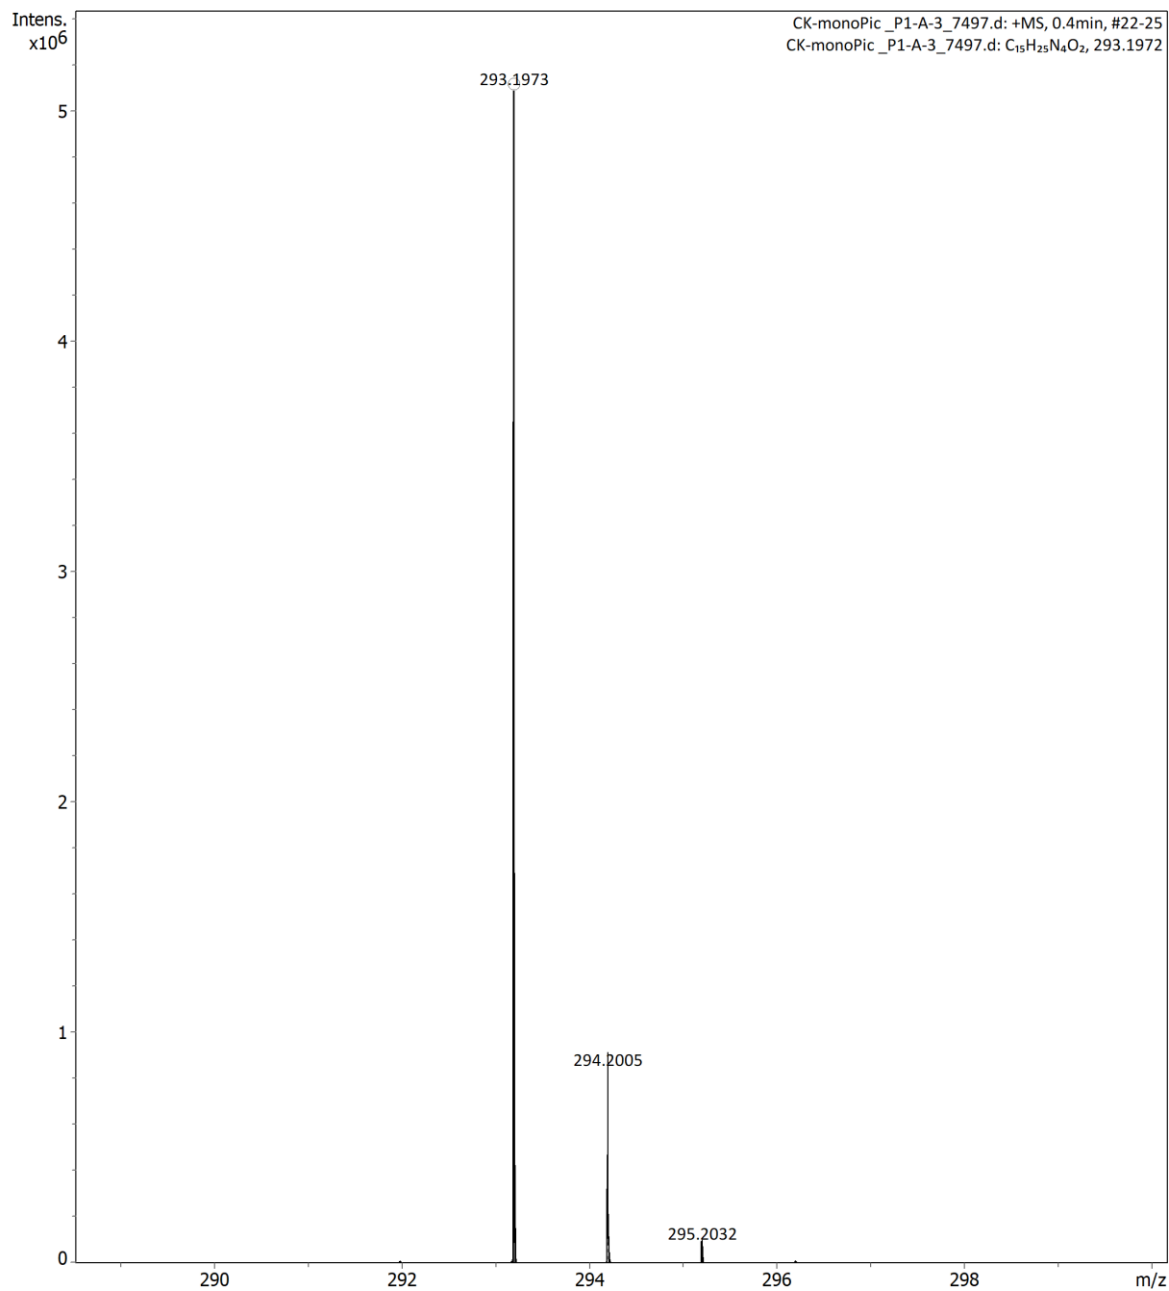

**Figure S235** ESI-HRMS of monoPic.

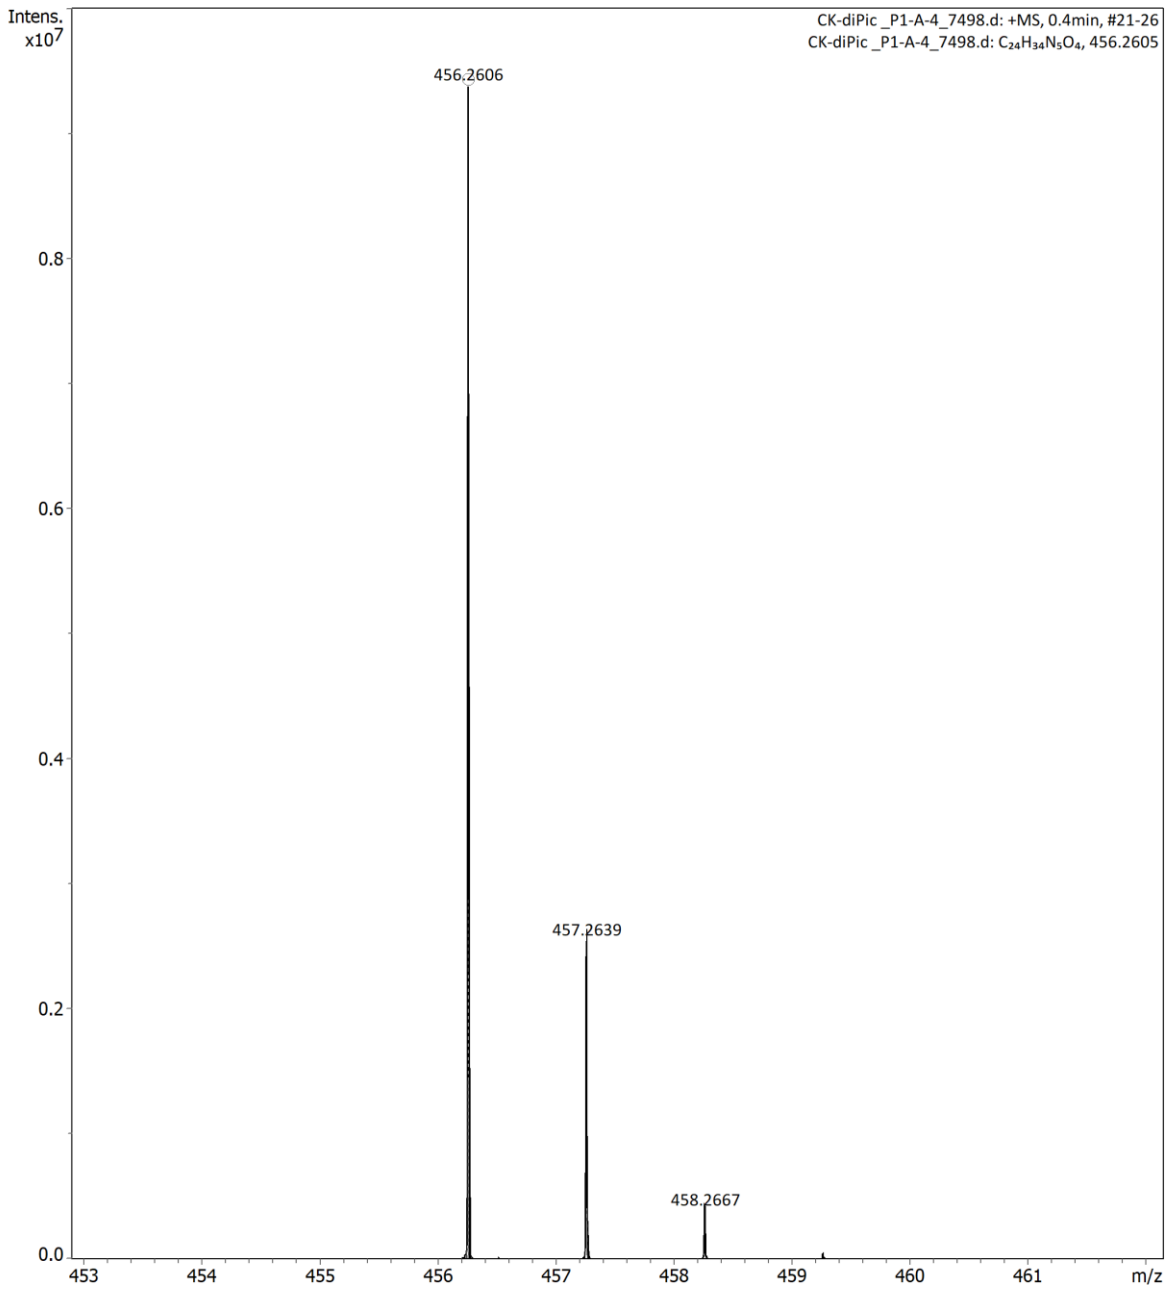

**Figure S236** ESI-HRMS of diPic.

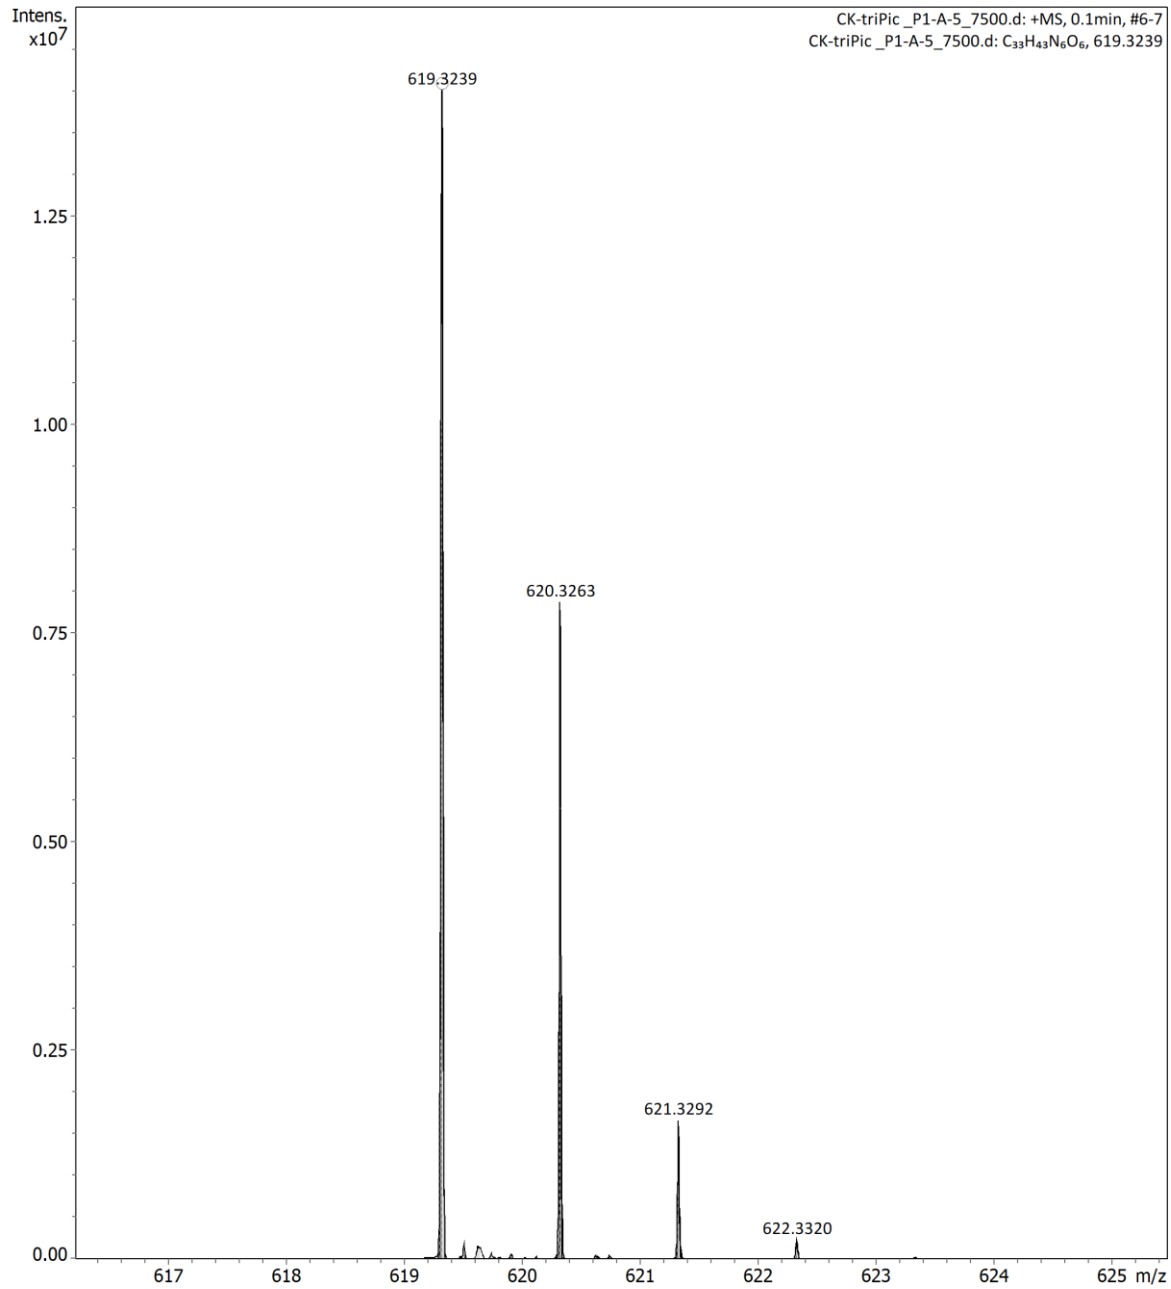

**Figure S237** ESI-HRMS of triPic.



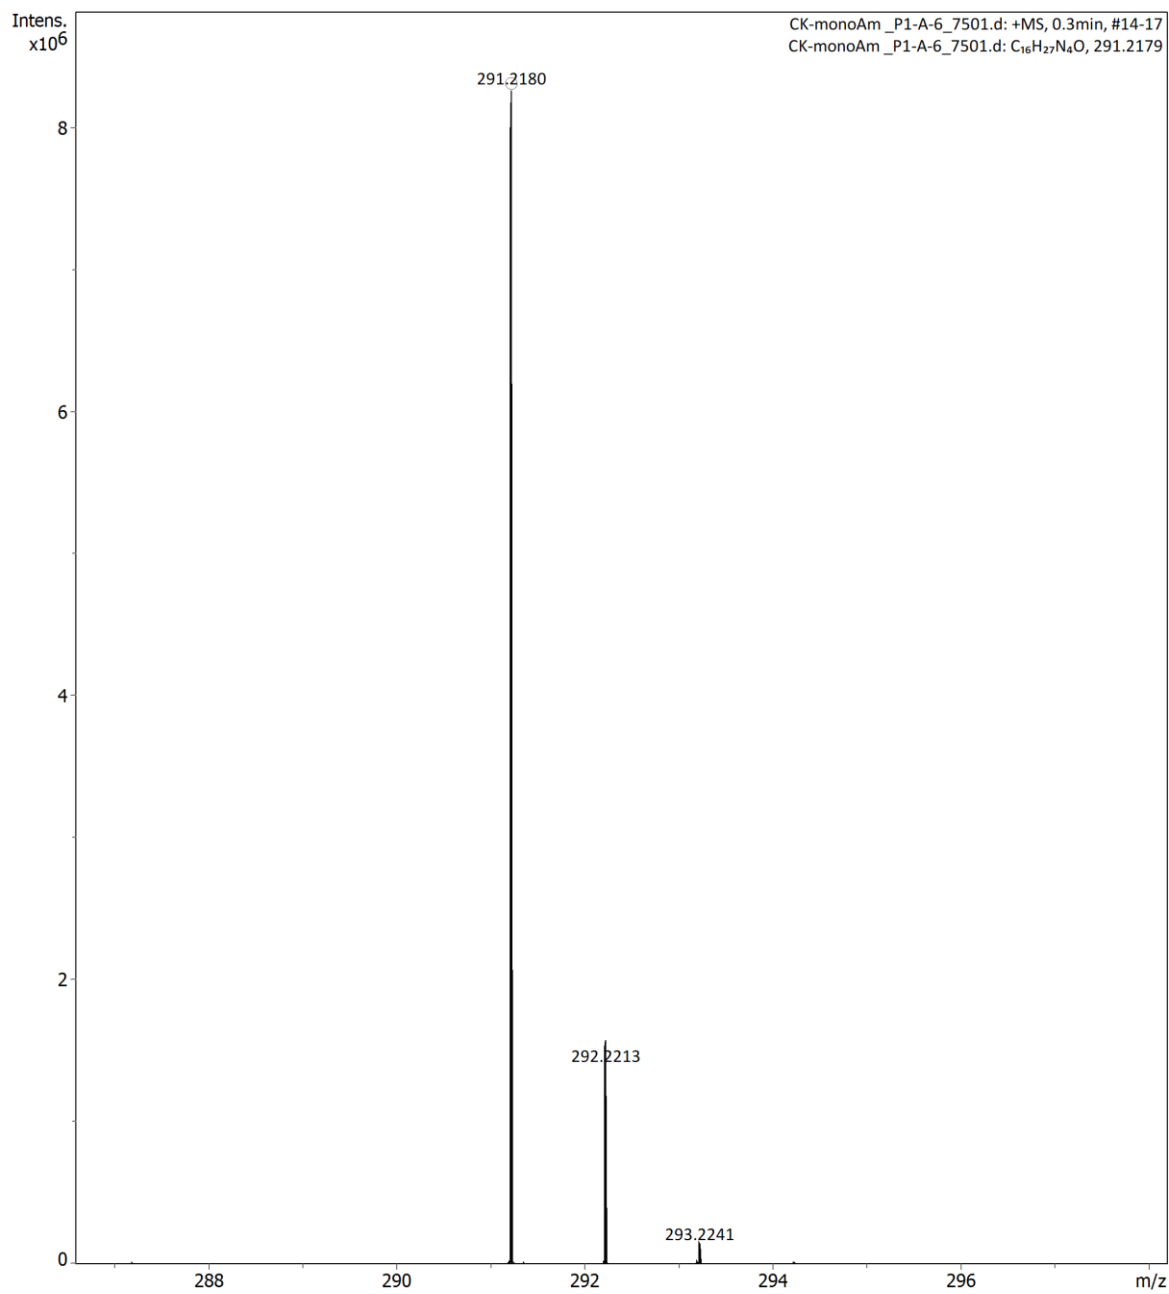

**Figure S238** ESI-HRMS of **monoAm**.

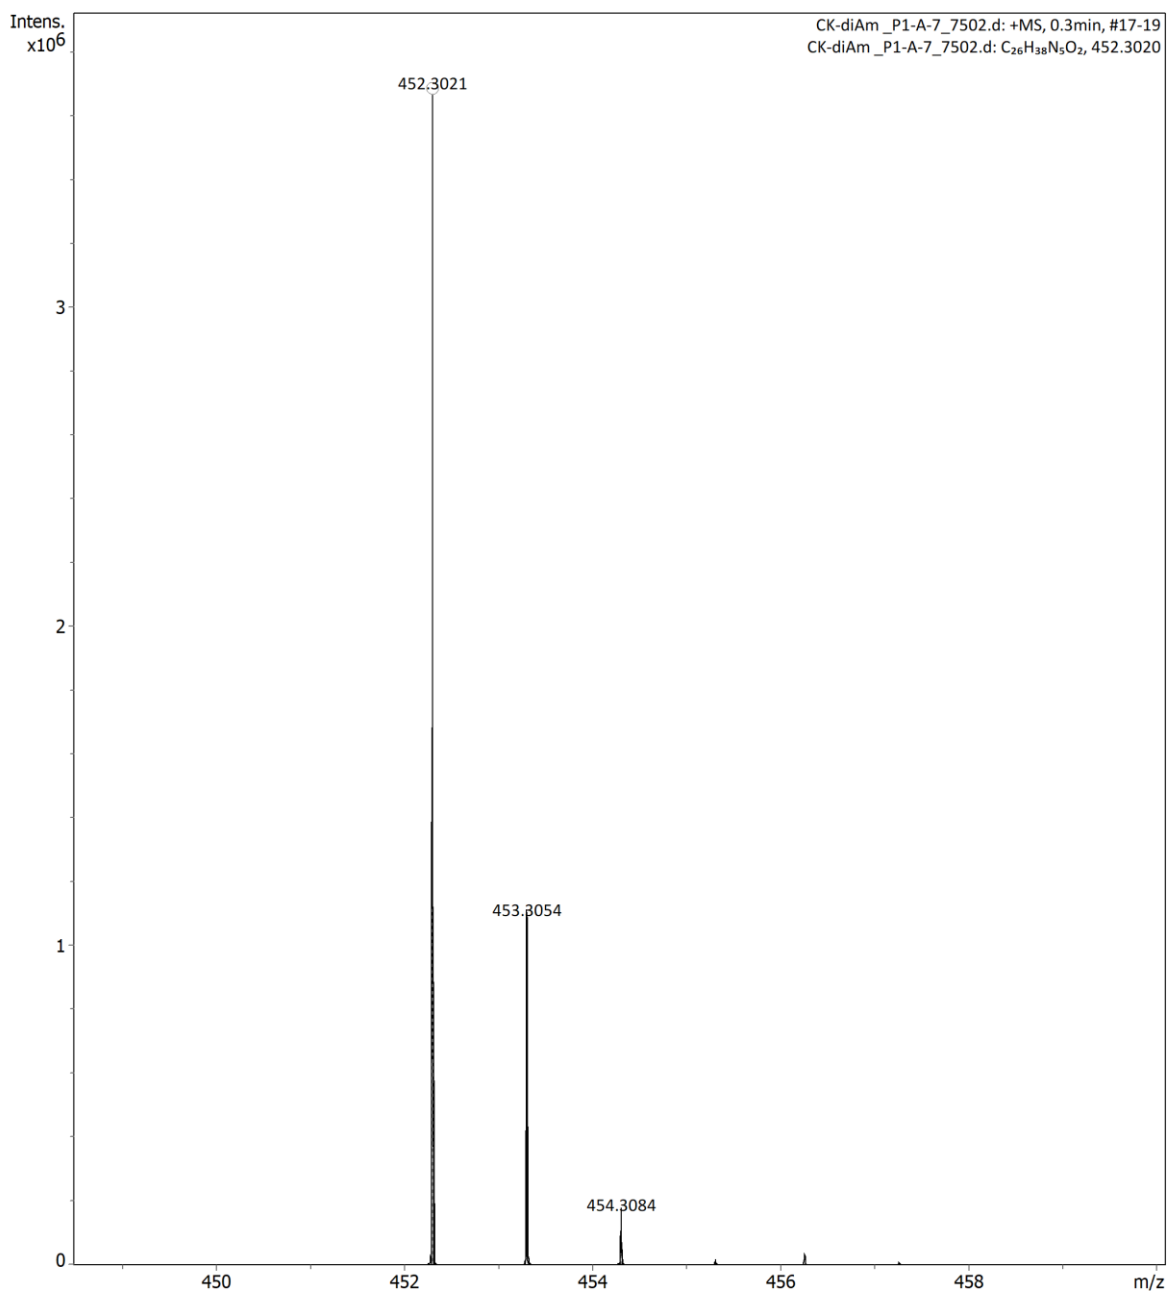

**Figure S239** ESI-HRMS of diAm.

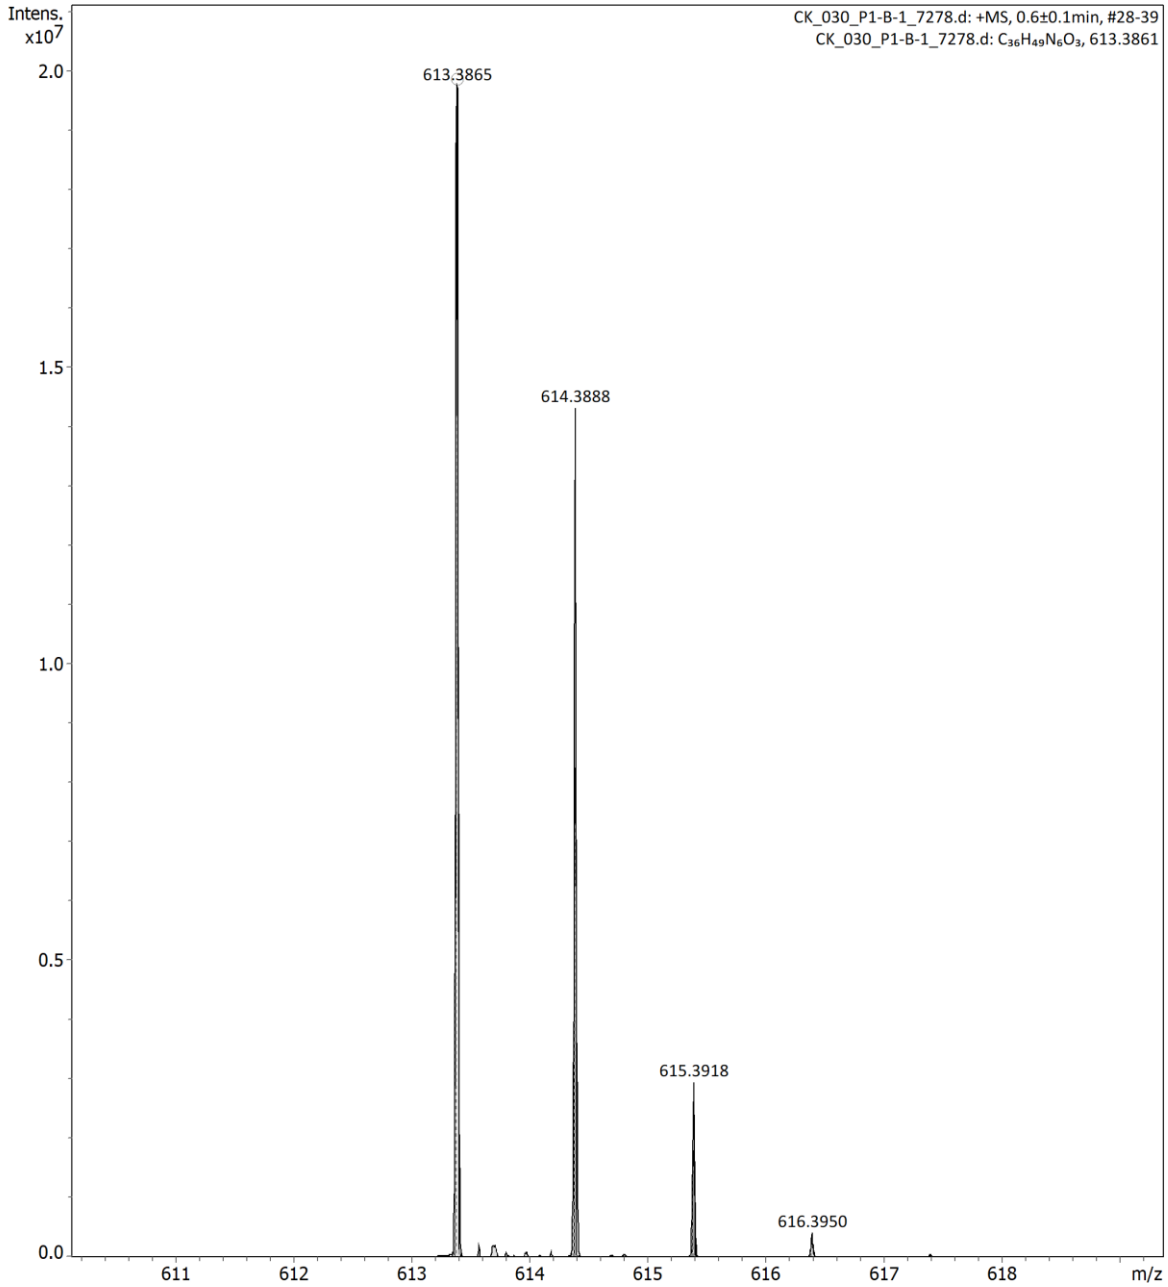

Figure S240 ESI-HRMS of L<sup>030</sup>.

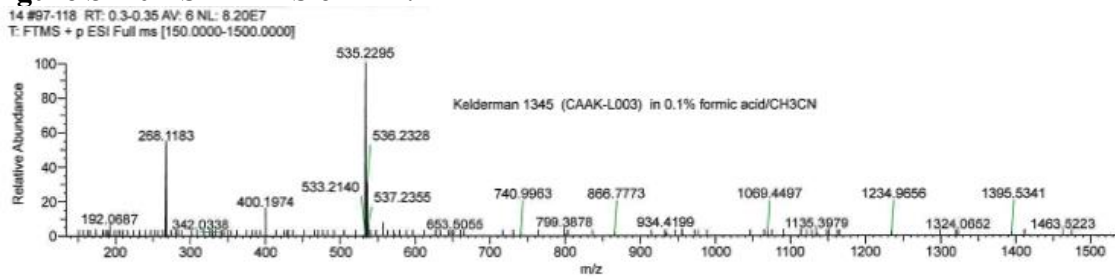

Figure S241 ESI-HRMS of H<sub>3</sub>L<sup>003</sup>.

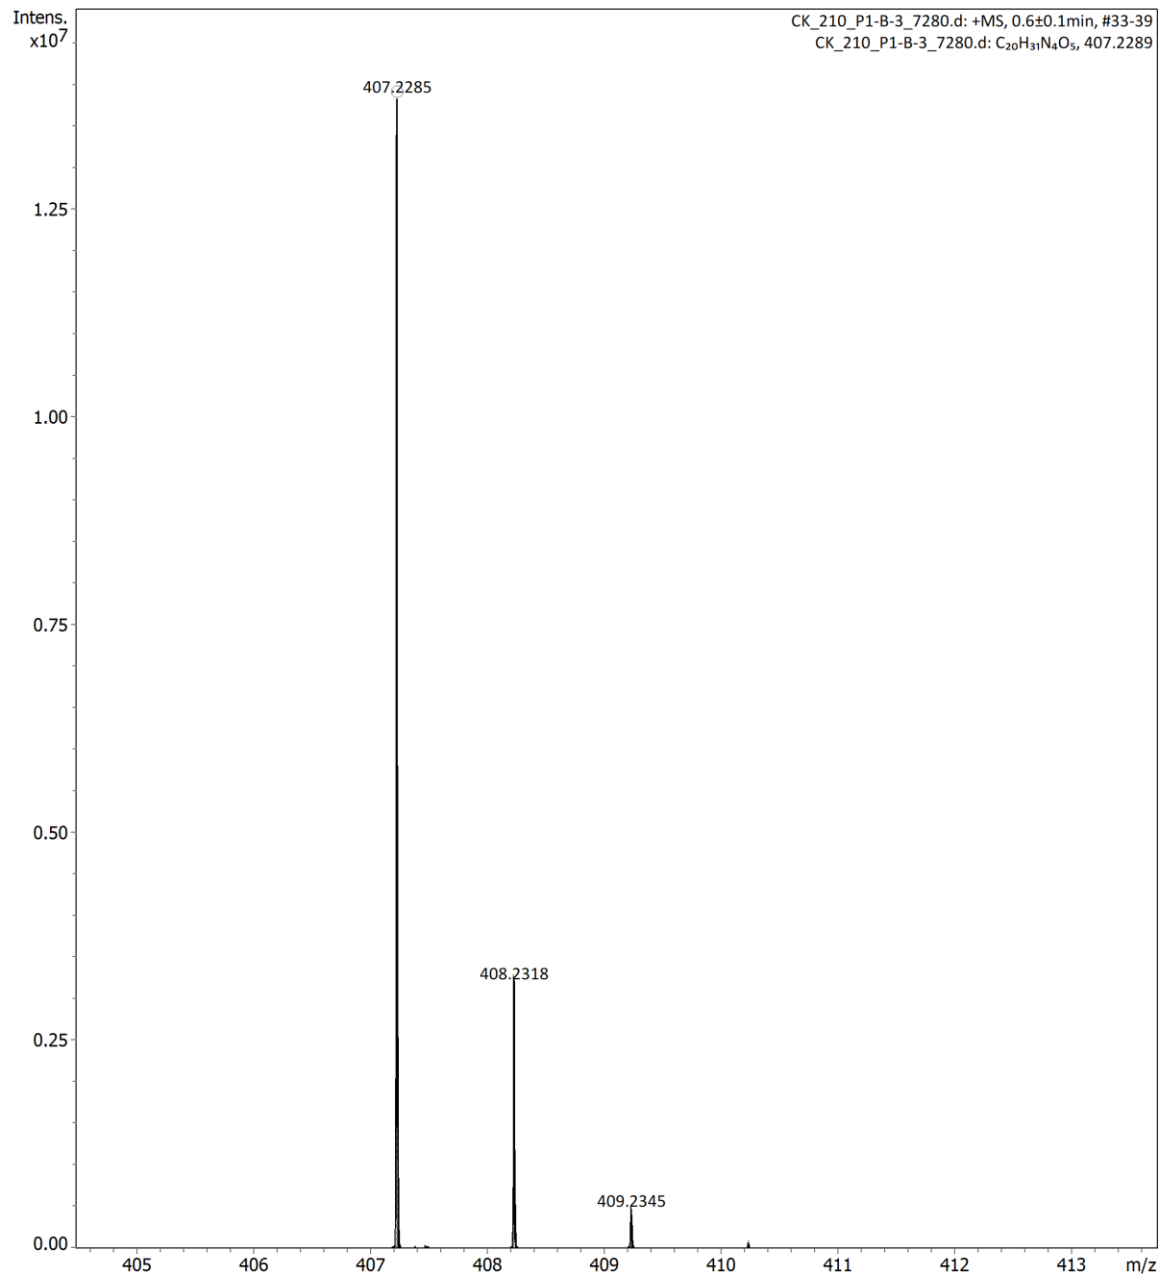

**Figure S242** ESI-HRMS of H<sub>2</sub>L<sup>210</sup>.

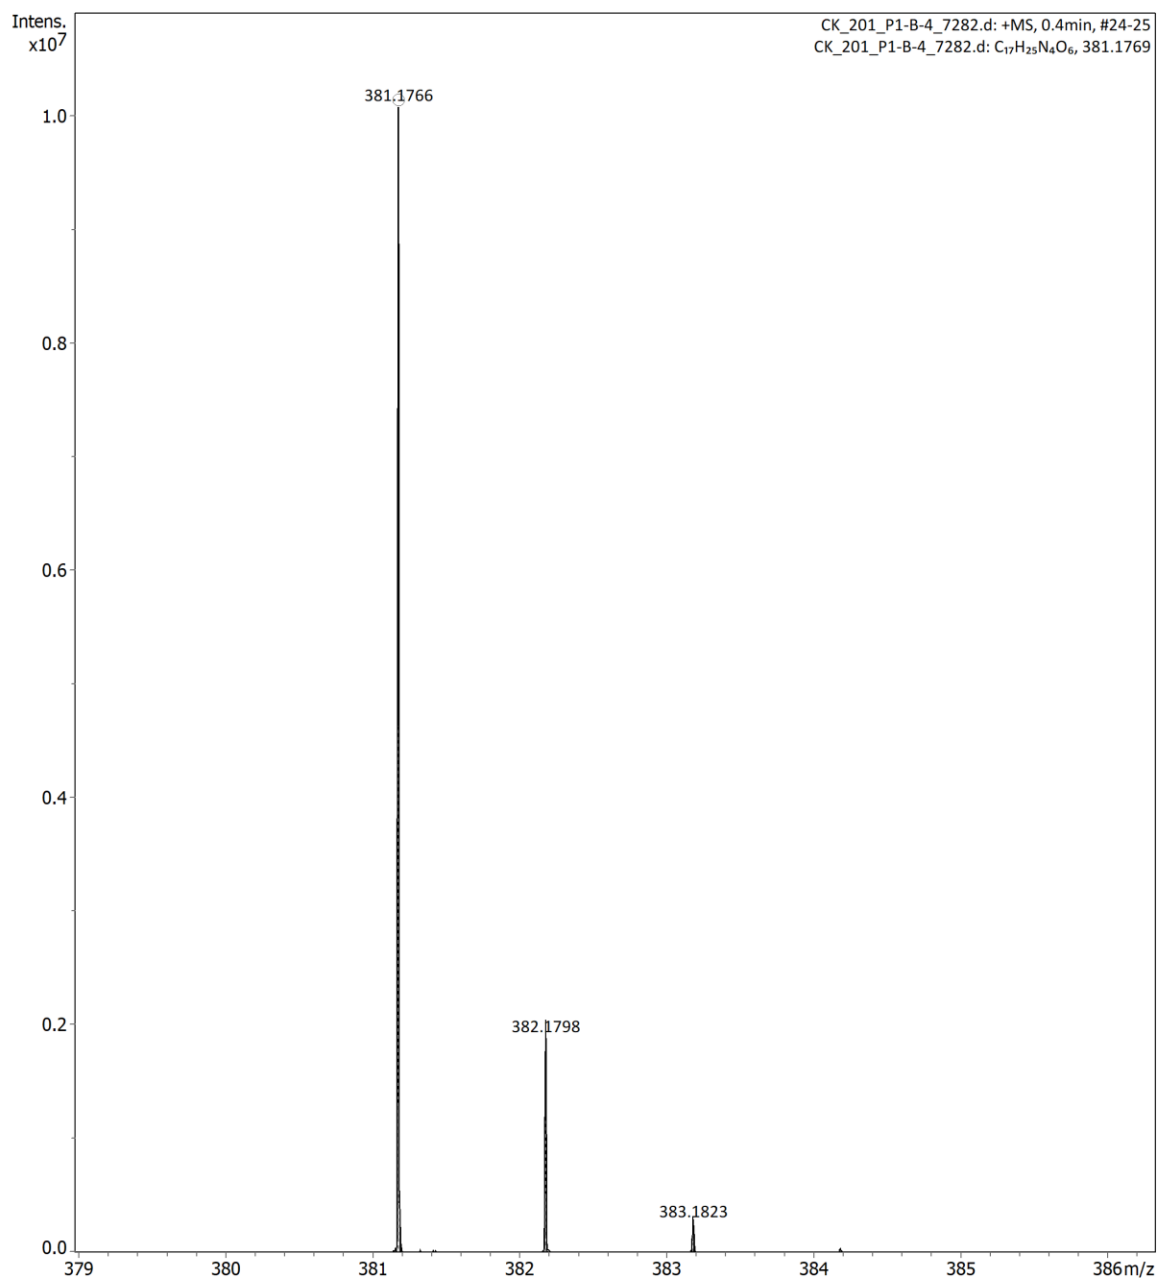

**Figure S243** ESI-HRMS of H<sub>3</sub>L<sup>201</sup> (H<sub>3</sub>mptacn).

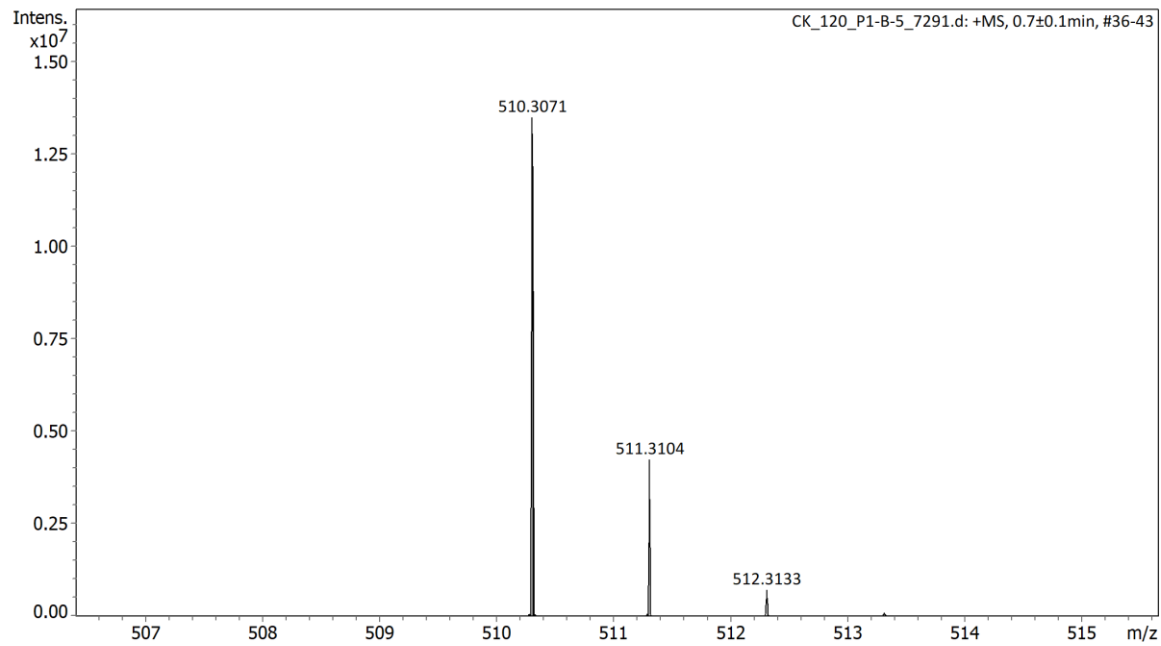

**Figure S244** ESI-HRMS of HL<sup>120</sup>.

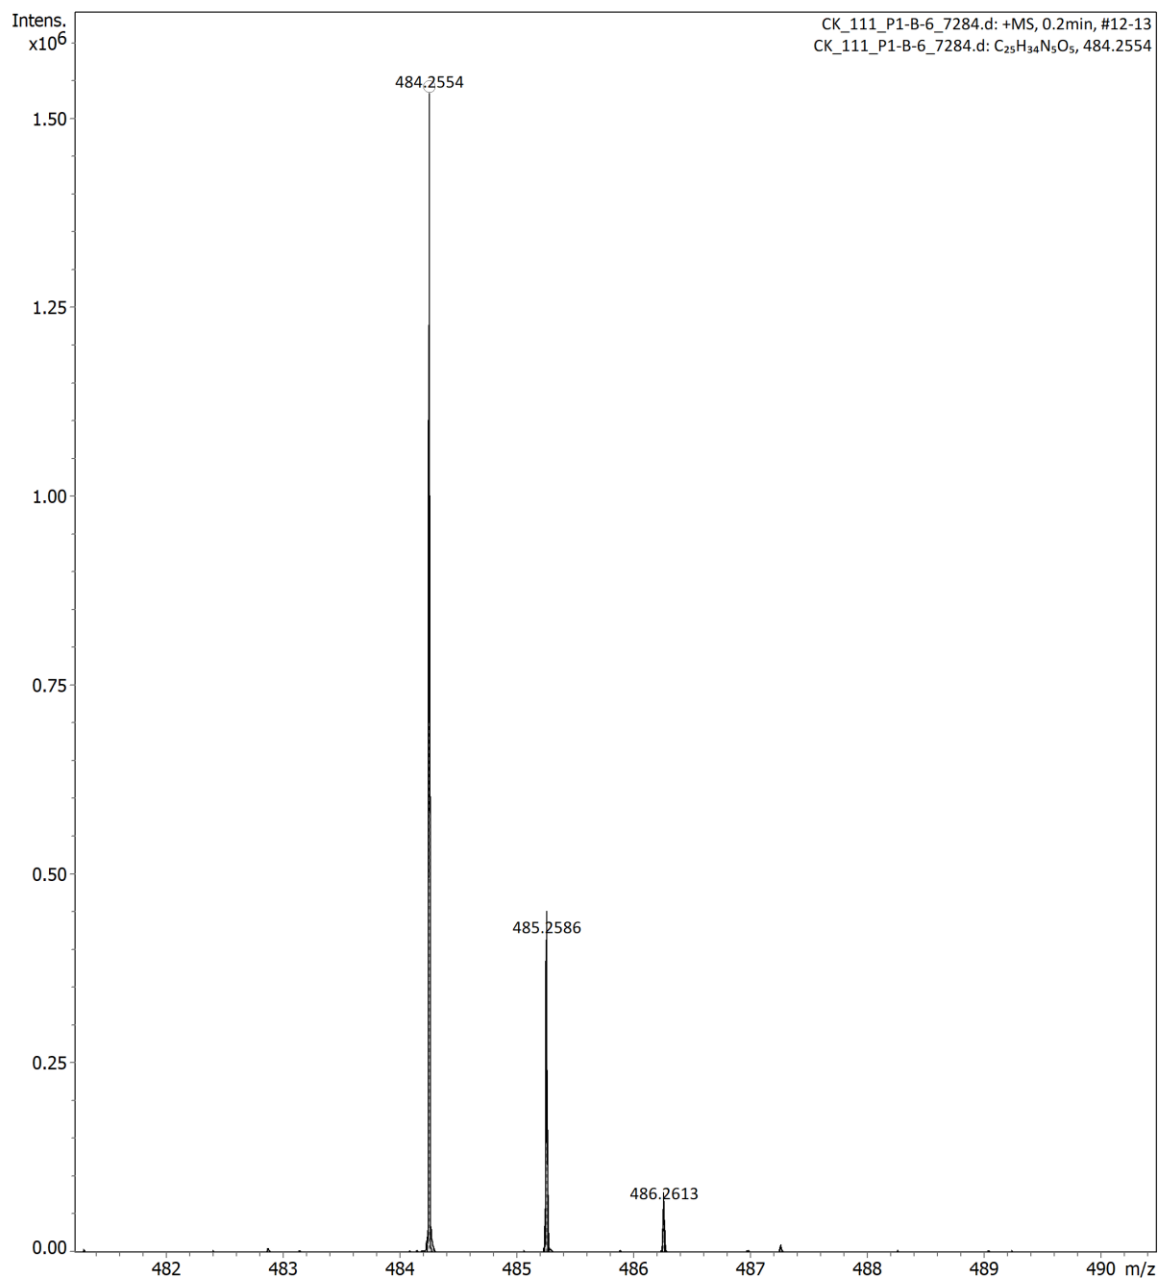

**Figure S245** ESI-HRMS of H<sub>2</sub>L<sup>111</sup>.

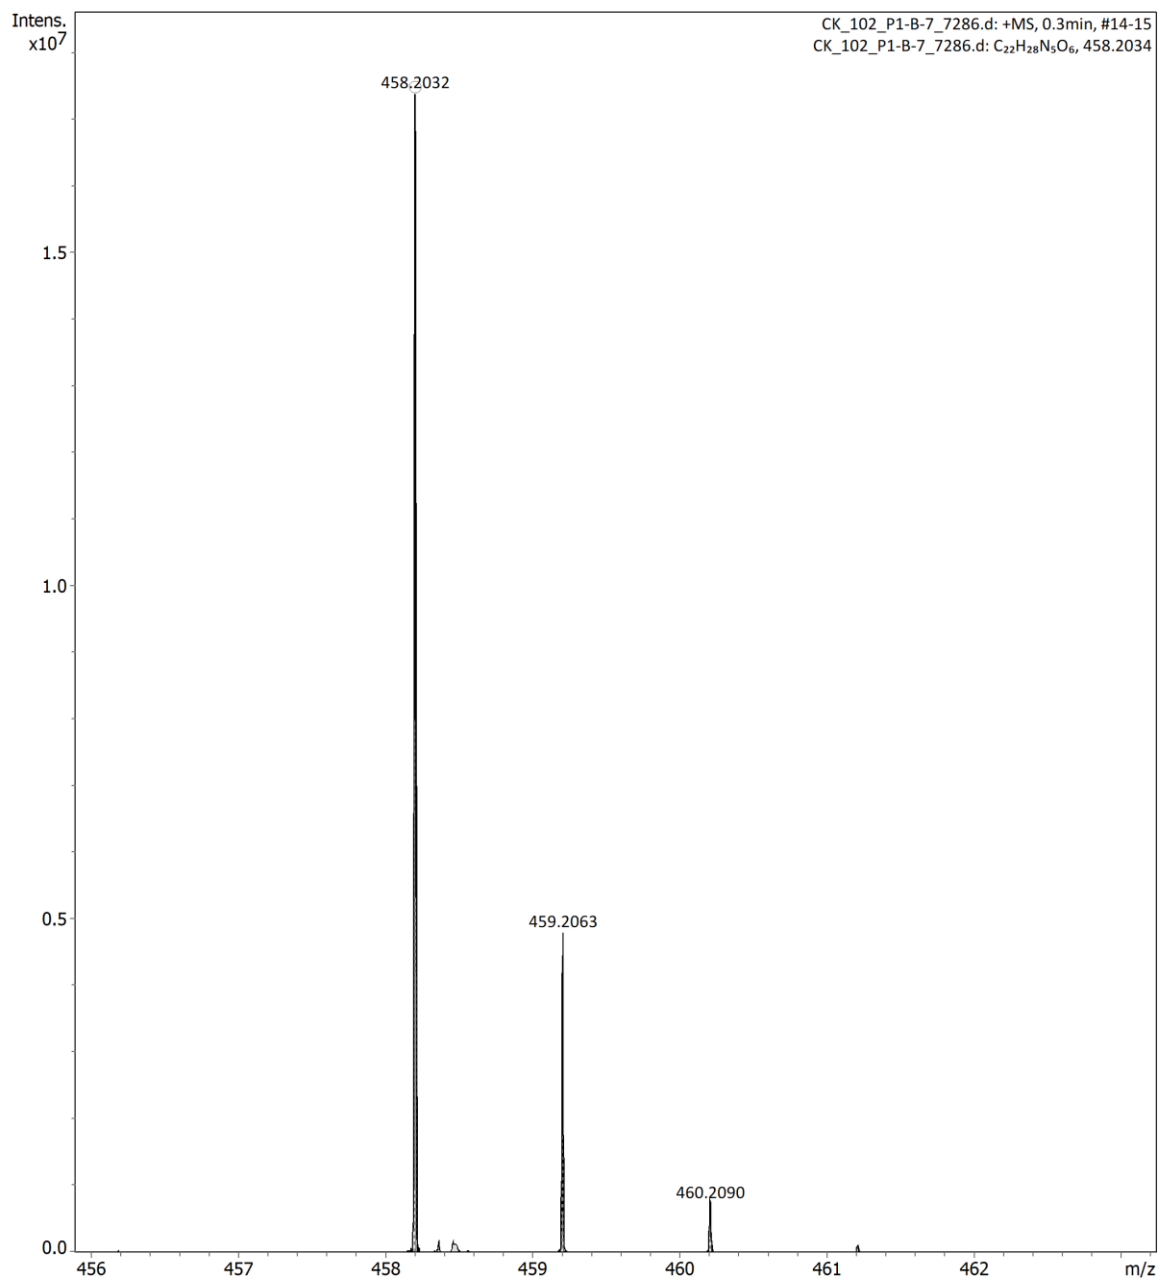

**Figure S246** ESI-HRMS of H<sub>3</sub>L<sup>102</sup>.



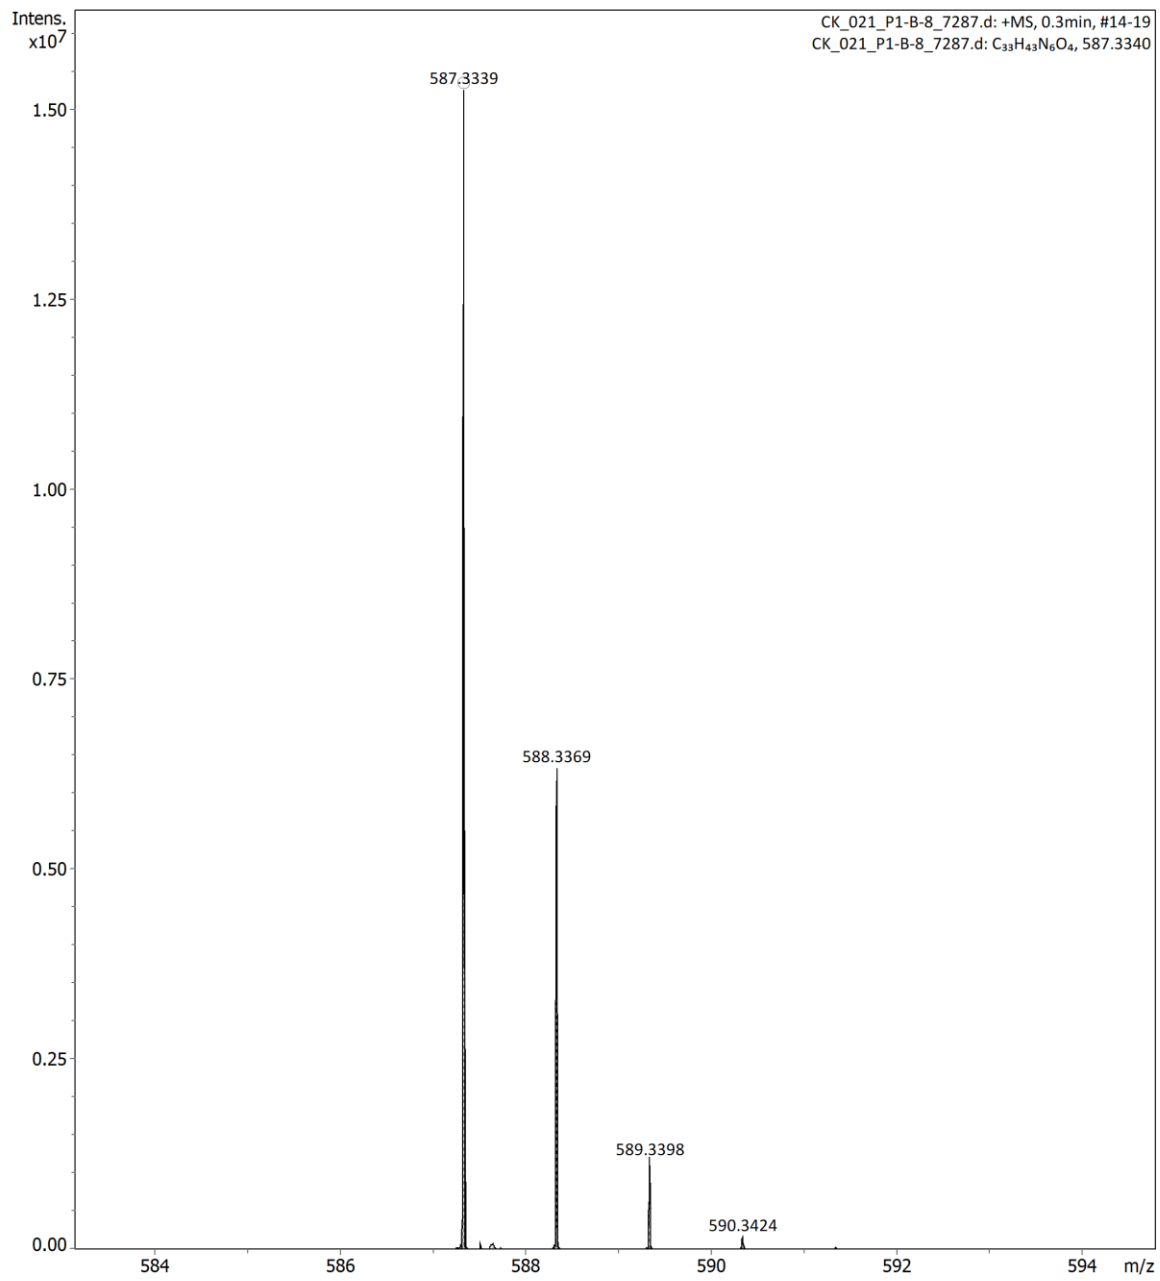

**Figure S247** ESI-HRMS of HL<sup>021</sup>.

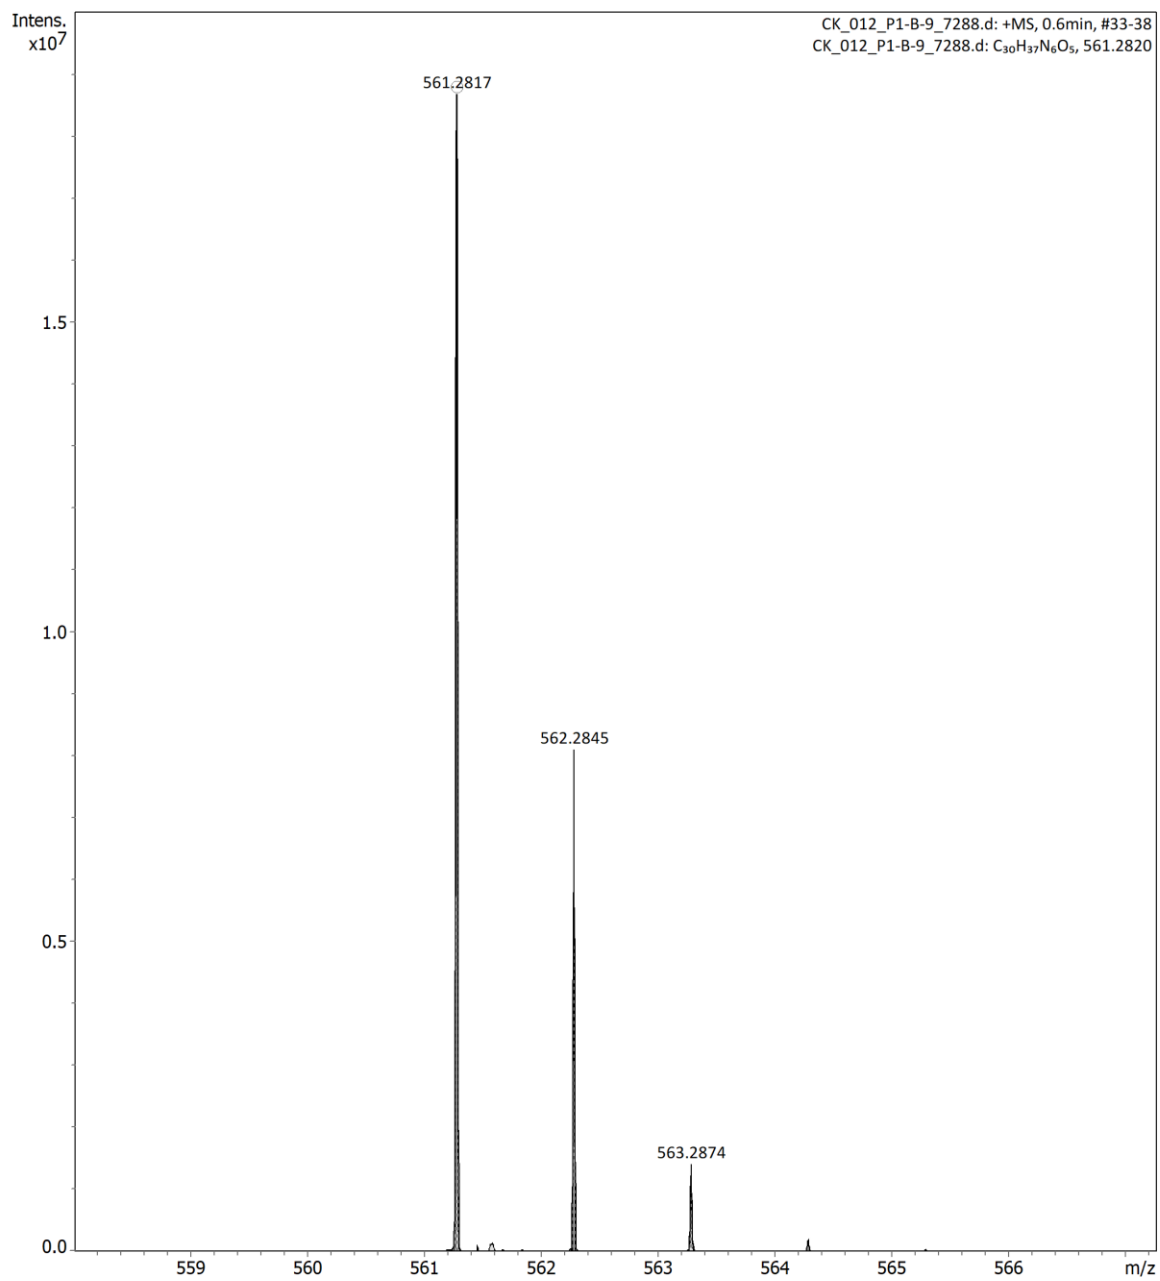

**Figure S248** ESI-HRMS of H<sub>2</sub>L<sup>012</sup>.

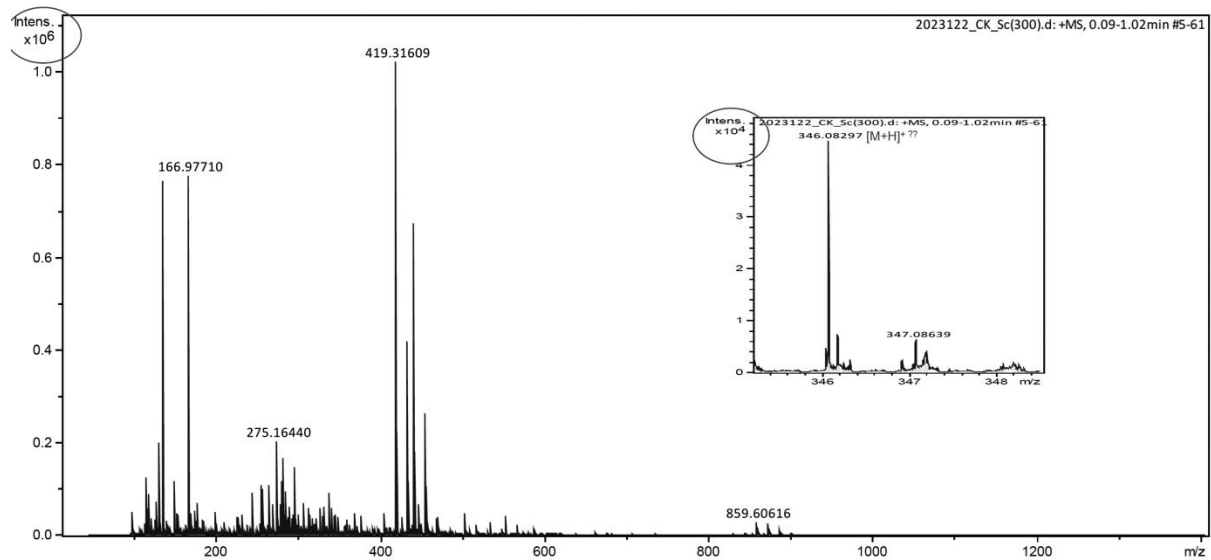

**Figure S249** ESI-HRMS of  $[\text{Sc}(\text{L}^{300}) + \text{H}]^+$ .

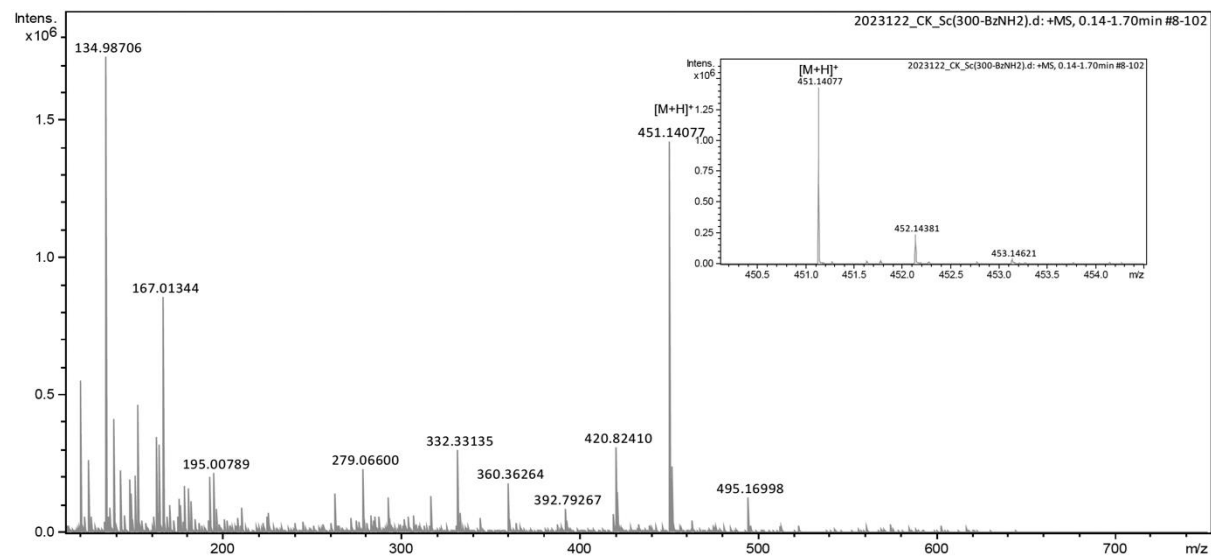

**Figure S250** ESI-HRMS of  $[\text{Sc}(\text{L}^{300}\text{-BzNH}_2) + \text{H}]^+$ .

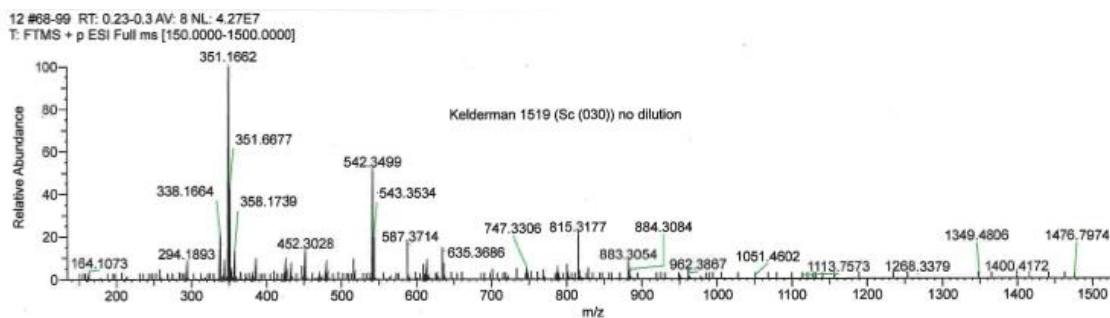

Figure S251 ESI-HRMS of  $[\text{Sc}(\text{L}^{030}) + \text{HCOO}]^{2+}$ .

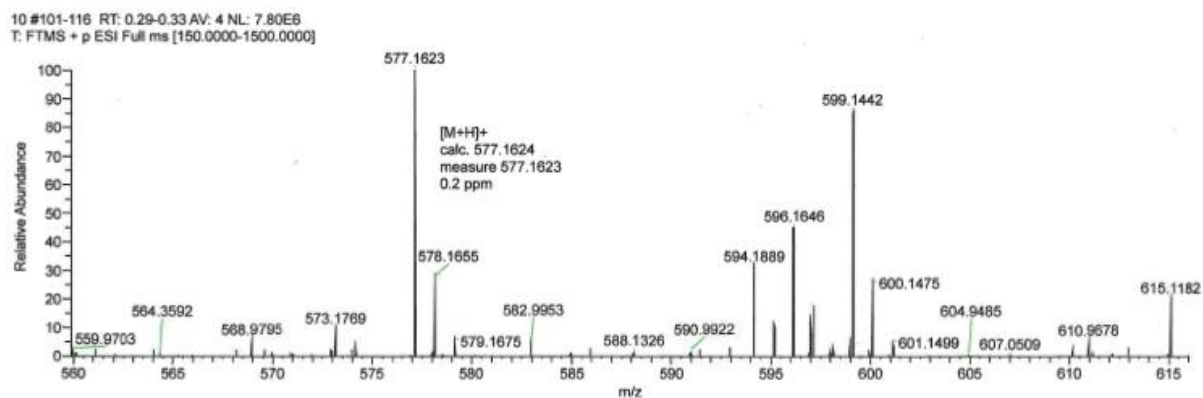

Figure S252 ESI-HRMS of  $[\text{Sc}(\text{L}^{003}) + \text{H}]^+$ .

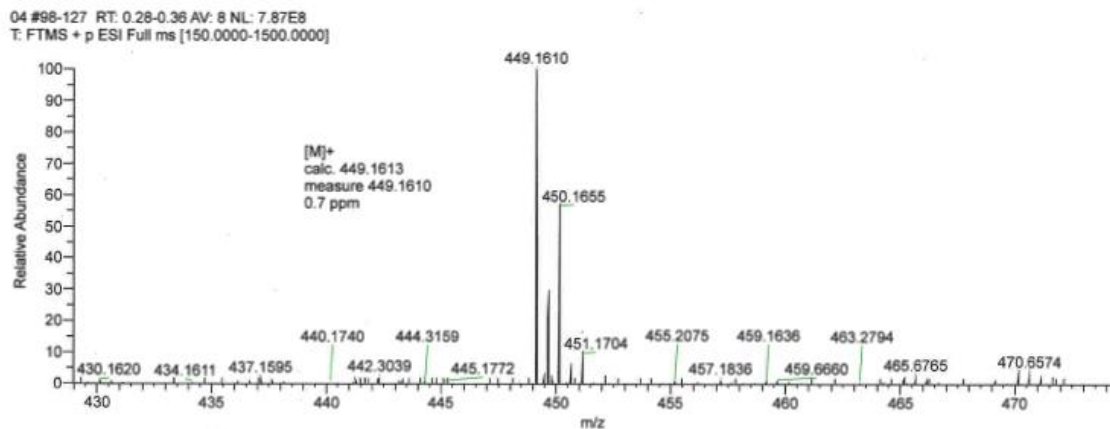

Figure S253 ESI-HRMS of  $[\text{Sc}(\text{L}^{210})]^+$ .

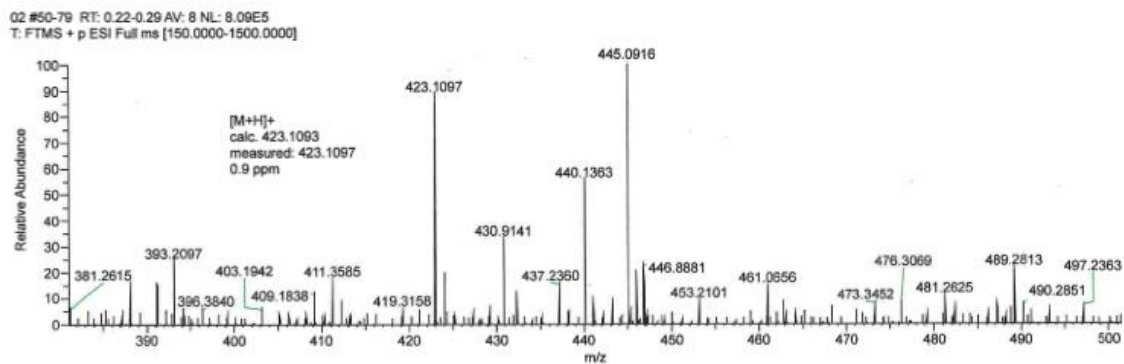

Figure S254 ESI-HRMS of  $[\text{Sc}(\text{L}^{201}) + \text{H}]^+$ .

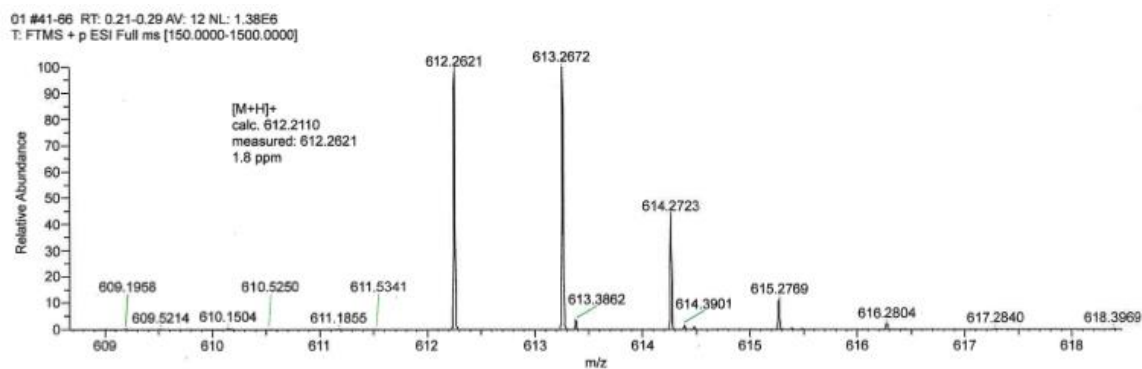

Figure S255 ESI-HRMS of  $[\text{Sc}(\text{L}^{120}) + \text{OAc}]^+$ .

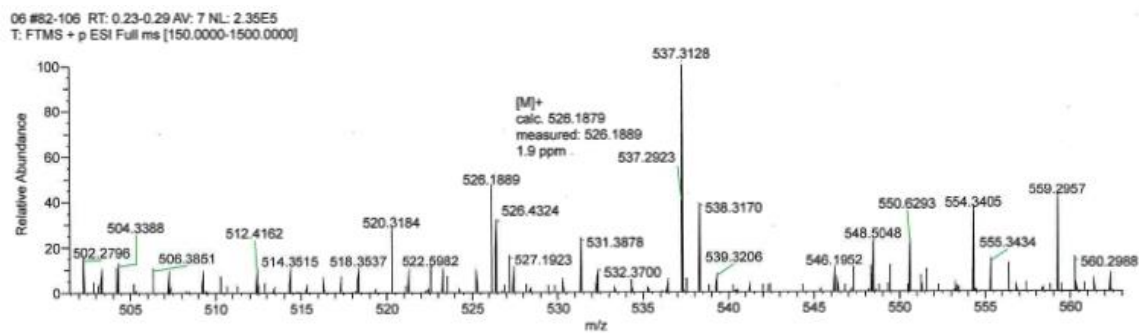

Figure S256 ESI-HRMS of  $[\text{Sc}(\text{L}^{111})]^+$ .

08 #102-123 RT: 0.29-0.35 AV: 6 NL: 4.54E7  
T: FTMS + p ESI Full ms [150.0000-1500.0000]

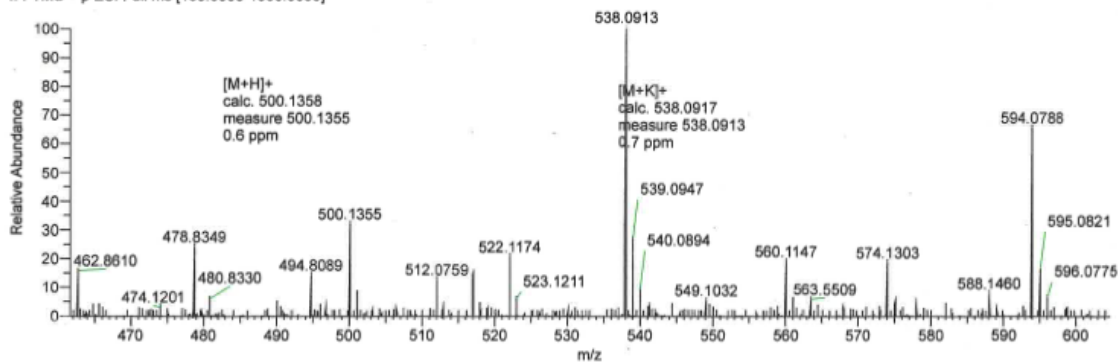

Figure S257 ESI-HRMS of  $[\text{Sc}(\text{L}^{102}) + \text{H}]^+$ .

01 #95-105 RT: 0.27-0.3 AV: 3 NL: 4.87E8  
T: FTMS + p ESI Full ms [150.0000-1500.0000]

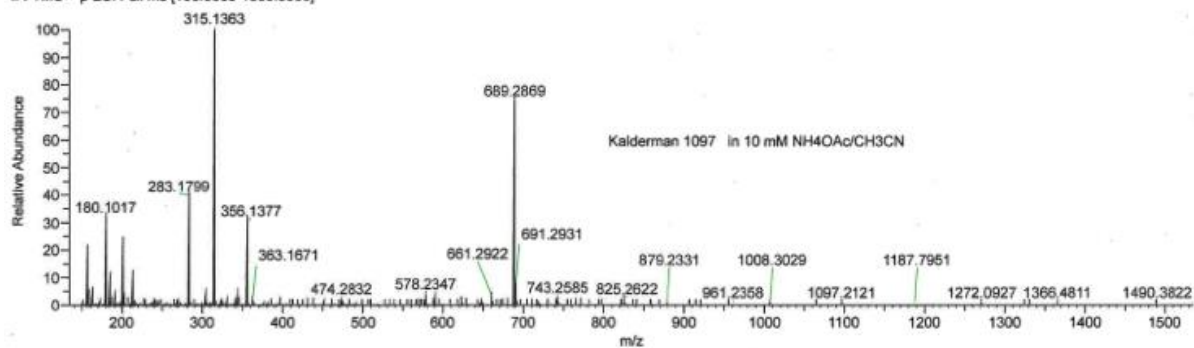

Figure S258 ESI-HRMS of  $[\text{Sc}(\text{L}^{021})_2]^{2+}$ .

04 #100 RT: 0.29 AV: 1 NL: 3.14E7  
T: FTMS + p ESI d Full ms2 603.2142@hcd35.00 [50.0000-635.0000]

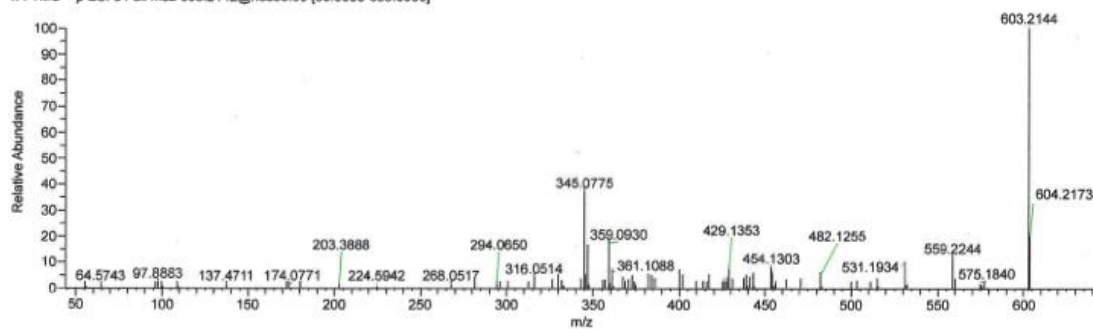

Figure S259 ESI-HRMS of  $[\text{Sc}(\text{L}^{012})_2]^{2+}$ .

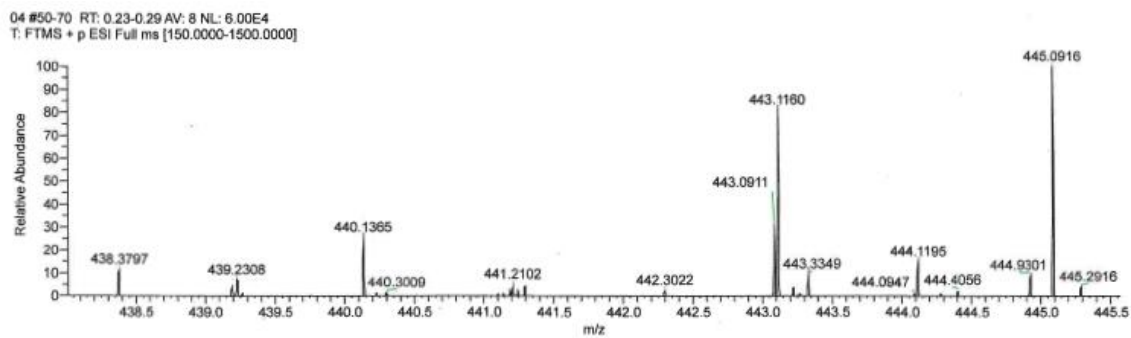

Figure S260 ESI-HRMS of  $[\text{ScF}(\text{L}^{201})]^-$ .

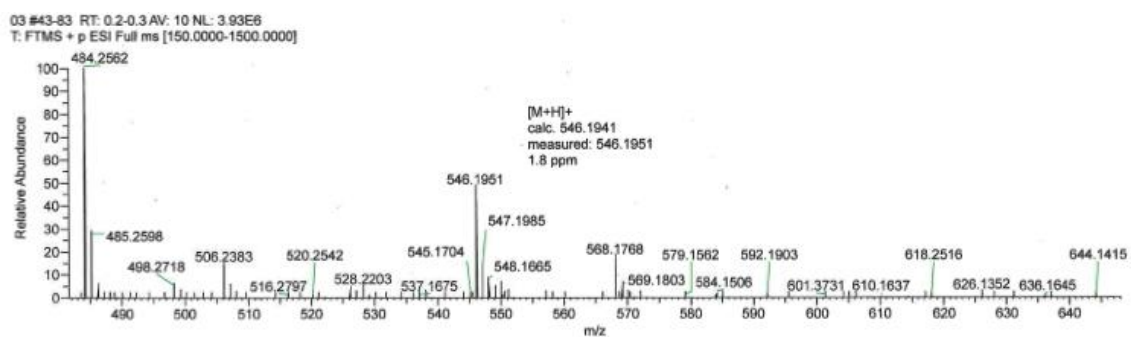

Figure S261 ESI-HRMS of  $[\text{ScF}(\text{L}^{111}) + \text{H}]^+$ .

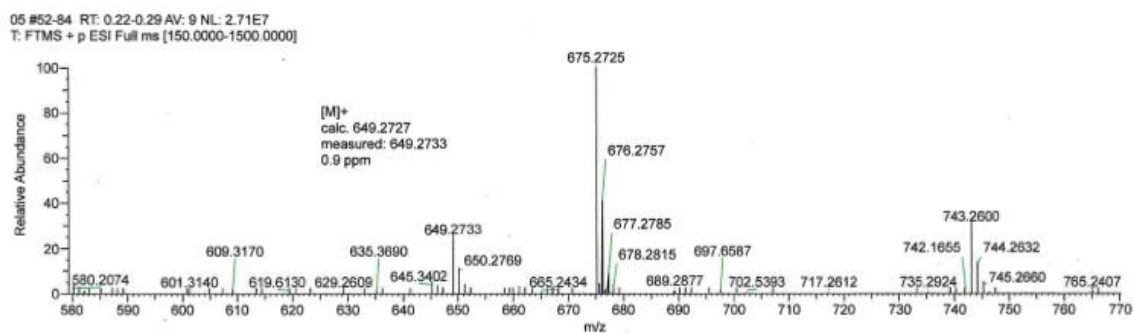

Figure S262 ESI-HRMS of  $[\text{ScF}(\text{L}^{021})]^+$ .

12 #102-116 RT: 0.29-0.33 AV: 4 NL: 1.44E8  
T: FTMS + p ESI Full ms [150.0000-1500.0000]

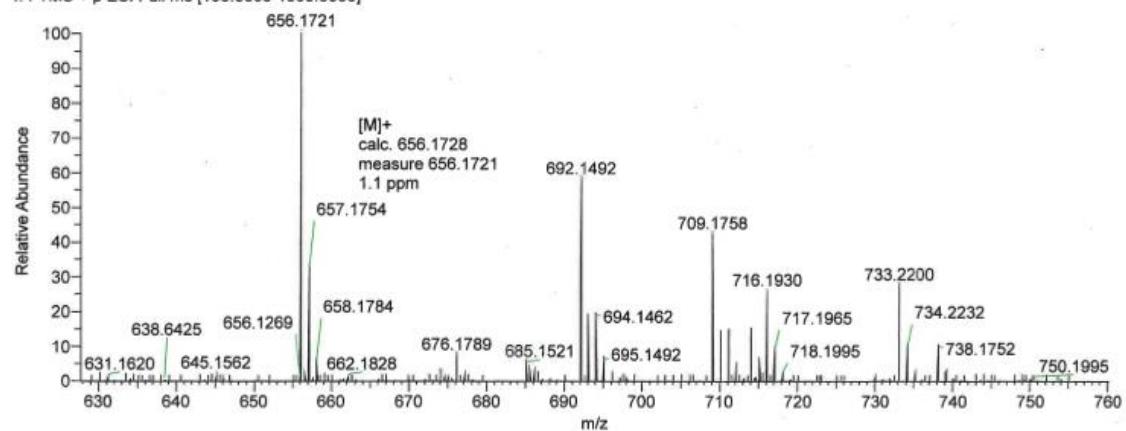

Figure S263 ESI-HRMS of  $[\text{Lu}(\text{L}^{11})]^+$ .



### 3 X-Ray Diffraction Analysis

#### 3.1 Data collection

A colorless crystal with approximate dimensions 0.018 x 0.018 x 0.023 mm<sup>3</sup> was selected under oil under ambient conditions and attached to the tip of a MiTeGen MicroMount©. The crystal was mounted in a stream of cold nitrogen at 100(1) K and centered in the X-ray beam by using a video camera. The crystal evaluation and data collection were performed on a Bruker D8 VENTURE PhotonIII four-circle diffractometer with Cu K $\alpha$  ( $\lambda = 1.54178 \text{ \AA}$ ) radiation and the detector to crystal distance of 4.5 cm.<sup>3</sup> The initial cell constants were obtained from a 180°  $\phi$  scan conducted at a  $2\theta = 50^\circ$  angle with an exposure time of 1 second per frame. The reflections were successfully indexed by an automated indexing routine built into the APEX3 program. The final cell constants were calculated from a set of 9895 strong reflections from the actual data collection. The data were collected by using a full sphere data collection routine to survey reciprocal space to the extent of a full sphere to a resolution of 0.79  $\text{\AA}$ . A total of 34355 data were harvested by collecting 27 sets of frames with 0.8° scans in  $\omega$  and  $\phi$  with exposure times of 5-20 sec per frame. These highly redundant datasets were corrected for Lorentz and polarization effects. The absorption correction was based on fitting a function to the empirical transmission surface as sampled by multiple equivalent measurements.<sup>4</sup>

#### 3.2 Structure Solution and Refinement

The diffraction data were consistent with the space groups  $Pn$  and  $P2/n$ . The  $E$ -statistics strongly suggested the non-centrosymmetric space group  $Pn$  which yielded chemically reasonable and computationally stable results of refinement.<sup>5-8</sup> The atomic coordinates were taken from BILTEY, the metal atom changed from Yb to Sc, and the solvent water molecules were refined with a new disorder model. All hydrogen atoms were included in the structure factor calculation at idealized positions and were allowed to ride on the neighboring atoms with relative isotropic displacement coefficients. The absolute structure was unequivocally established by anomalous dispersion effects. There are 3 solvent water molecules per Sc complex in the lattice. Water molecule O3 is disordered over two positions with the major disorder component occupancy equal to 90.8(9)%. The water molecules O1, O2, and O3 were refined with H atoms and constrained water molecule geometries; it was not possible to reliably place H atoms on the oxygen atom in the minor disorder component. The final least-squares refinement of 401 parameters against 5395 data resulted in residuals  $R$  (based on  $F^2$  for  $I \geq 2\sigma$ ) and  $wR$  (based on  $F^2$  for all data) of 0.0441 and 0.1130, respectively. The final difference Fourier map was featureless.

#### 3.3 Crystal Data Summary

Crystal Data for C<sub>27</sub>H<sub>32.82</sub>N<sub>6</sub>O<sub>9</sub>Sc ( $M = 630.37 \text{ g/mol}$ ): monoclinic, space group  $Pn$  (no. 7),  $a = 7.9195(6) \text{ \AA}$ ,  $b = 11.7007(11) \text{ \AA}$ ,  $c = 14.6519(15) \text{ \AA}$ ,  $\beta = 98.998(8)^\circ$ ,  $V = 1341.0(2) \text{ \AA}^3$ ,  $Z = 2$ ,  $T = 100.00 \text{ K}$ ,  $\mu(\text{Cu K}\alpha) = 2.942 \text{ mm}^{-1}$ ,  $D_{\text{calc}} = 1.561 \text{ g/cm}^3$ , 33522 reflections measured ( $7.556^\circ \leq 2\theta \leq 154.962^\circ$ ), 5395 unique ( $R_{\text{int}} = 0.0653$ ,  $R_{\text{sigma}} = 0.0412$ ) which were used in all calculations. The final  $R_1$  was 0.0441 ( $I > 2\sigma(I)$ ) and  $wR_2$  was 0.1130 (all data).

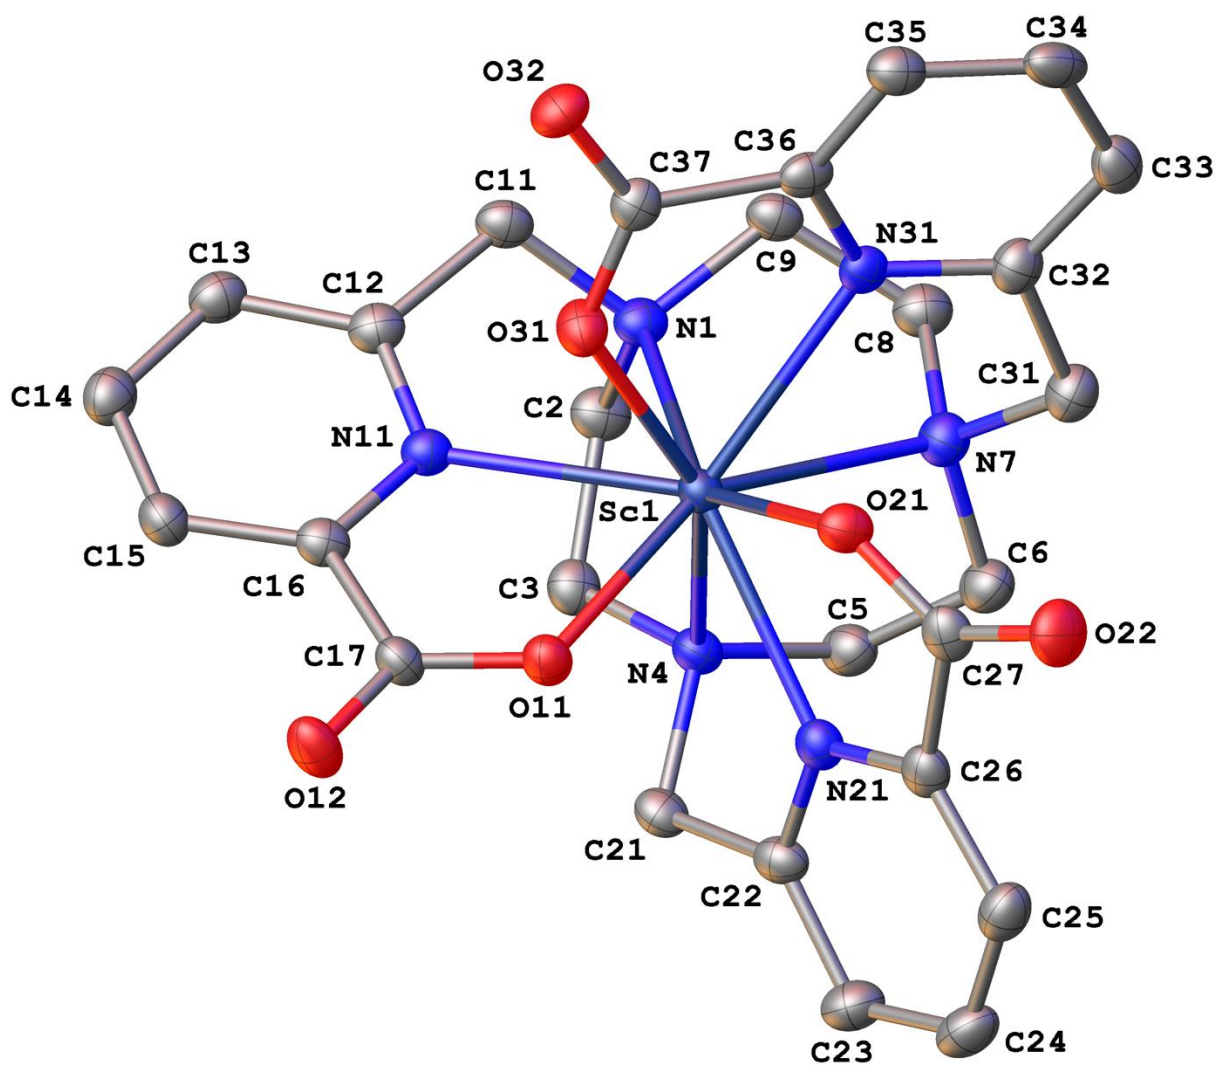

**Figure S264** A molecular drawing of the entire complex [Sc(L<sup>003</sup>)] shown with 50% probability ellipsoids. All H atoms and solvent molecules are omitted.

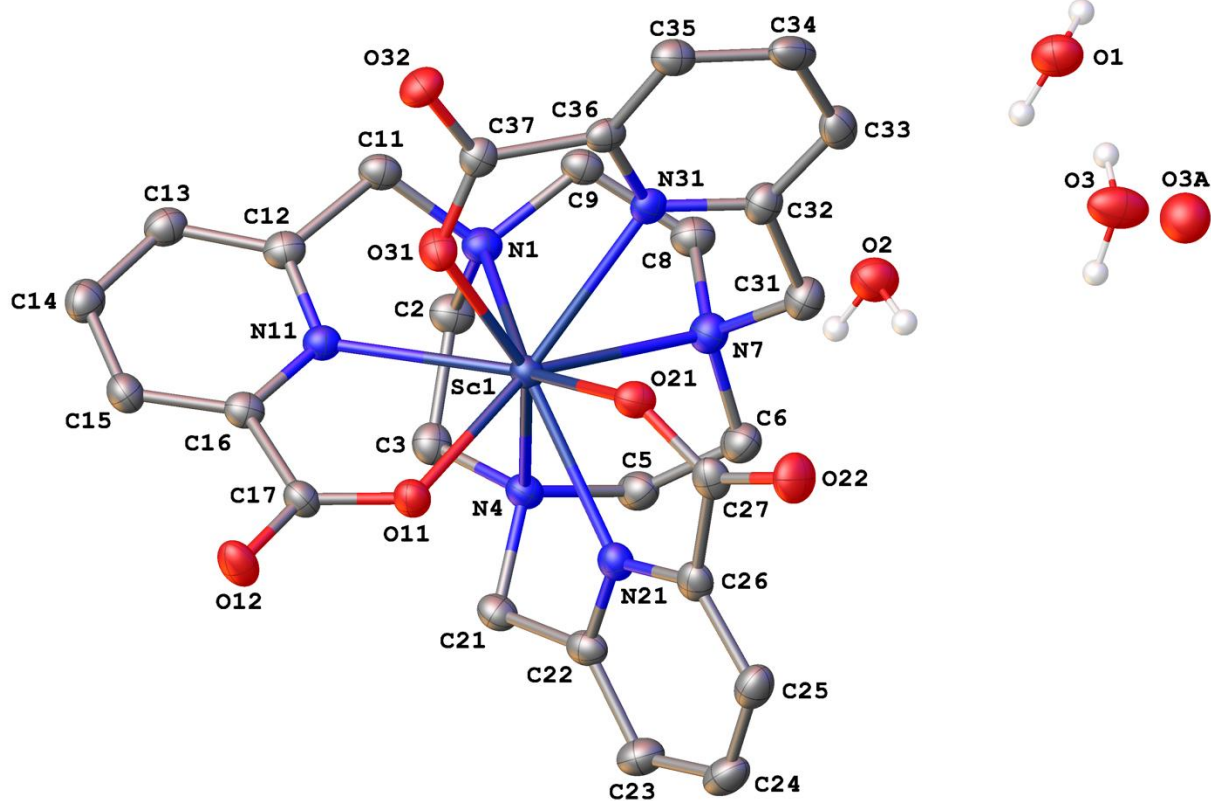

**Figure S265** A molecular drawing of the entire complex in [Sc(L<sup>003</sup>)] shown with 50% probability ellipsoids. All H atoms on the Sc complex are omitted. All refined H atoms on the water molecules are shown.

**Table S13 Crystal data and structure refinement for [Sc(L<sup>003</sup>)]**

|                                             |                                                                                      |
|---------------------------------------------|--------------------------------------------------------------------------------------|
| Identification code                         | 2369298                                                                              |
| Empirical formula                           | C <sub>27</sub> H <sub>27</sub> N <sub>6</sub> O <sub>6</sub> Sc • 3H <sub>2</sub> O |
| Formula weight                              | 630.37                                                                               |
| Temperature/K                               | 100.00                                                                               |
| Crystal system                              | monoclinic                                                                           |
| Space group                                 | <i>Pn</i>                                                                            |
| a/Å                                         | 7.9195(6)                                                                            |
| b/Å                                         | 11.7007(11)                                                                          |
| c/Å                                         | 14.6519(15)                                                                          |
| α/°                                         | 90                                                                                   |
| β/°                                         | 98.998(8)                                                                            |
| γ/°                                         | 90                                                                                   |
| Volume/Å <sup>3</sup>                       | 1341.0(2)                                                                            |
| Z                                           | 2                                                                                    |
| ρ <sub>calc</sub> /g/cm <sup>3</sup>        | 1.561                                                                                |
| μ/mm <sup>-1</sup>                          | 2.942                                                                                |
| F(000)                                      | 660.0                                                                                |
| Crystal size/mm <sup>3</sup>                | 0.023 × 0.018 × 0.018                                                                |
| Radiation                                   | Cu Kα (λ = 1.54178)                                                                  |
| 2θ range for data collection/°              | 7.556 to 154.962                                                                     |
| Index ranges                                | -9 ≤ h ≤ 10, -14 ≤ k ≤ 14, -18 ≤ l ≤ 17                                              |
| Reflections collected                       | 33522                                                                                |
| Independent reflections                     | 5395 [R <sub>int</sub> = 0.0653, R <sub>sigma</sub> = 0.0412]                        |
| Data/restraints/parameters                  | 5395/2/401                                                                           |
| Goodness-of-fit on F <sup>2</sup>           | 1.063                                                                                |
| Final R indexes [I ≥ 2σ (I)]                | R <sub>1</sub> = 0.0441, wR <sub>2</sub> = 0.1105                                    |
| Final R indexes [all data]                  | R <sub>1</sub> = 0.0473, wR <sub>2</sub> = 0.1130                                    |
| Largest diff. peak/hole / e Å <sup>-3</sup> | 0.26/-0.46                                                                           |
| Flack parameter                             | -0.009(9)                                                                            |

**Table S14 Fractional Atomic Coordinates ( $\times 10^4$ ) and Equivalent Isotropic Displacement Parameters ( $\text{\AA}^2 \times 10^3$ ) for [Sc(L<sup>003</sup>)].  $U_{\text{eq}}$  is defined as 1/3 of the trace of the orthogonalized  $U_{\text{ij}}$  tensor.**

| Atom | <i>x</i>  | <i>y</i>  | <i>z</i>   | $U_{\text{eq}}$ |
|------|-----------|-----------|------------|-----------------|
| Sc1  | 5474.8(7) | 7229.6(5) | 6013.0(5)  | 15.91(16)       |
| O11  | 3892(4)   | 8777(2)   | 5779.3(19) | 21.2(5)         |
| O12  | 2806(4)   | 10414(3)  | 6228(2)    | 27.3(6)         |
| O21  | 3140(4)   | 6413(2)   | 5225(2)    | 21.2(5)         |
| O22  | 1844(4)   | 5619(3)   | 3906(2)    | 29.2(6)         |
| O31  | 4023(4)   | 7000(2)   | 7150(2)    | 22.9(6)         |
| O32  | 2845(4)   | 5991(3)   | 8175.3(19) | 24.0(6)         |
| N1   | 8313(4)   | 6977(3)   | 7095(2)    | 20.6(7)         |
| N4   | 7939(4)   | 8204(3)   | 5385(2)    | 19.2(6)         |
| N7   | 7464(4)   | 5771(3)   | 5394(2)    | 22.4(7)         |
| N11  | 6139(4)   | 8632(3)   | 7244(2)    | 18.8(6)         |
| N21  | 4968(4)   | 7738(3)   | 4405(2)    | 19.7(6)         |
| N31  | 5089(4)   | 5223(3)   | 6385(2)    | 18.1(6)         |
| C2   | 9734(5)   | 7752(3)   | 6878(3)    | 24.0(8)         |
| C3   | 9119(5)   | 8686(3)   | 6179(3)    | 22.4(8)         |
| C5   | 8941(6)   | 7428(4)   | 4849(3)    | 25.0(8)         |
| C6   | 8104(6)   | 6282(4)   | 4591(3)    | 25.5(8)         |
| C8   | 8975(5)   | 5391(4)   | 6105(3)    | 25.1(8)         |
| C9   | 8828(5)   | 5762(3)   | 7080(3)    | 21.1(8)         |
| C11  | 8018(5)   | 7248(3)   | 8043(3)    | 21.5(8)         |
| C12  | 7183(5)   | 8402(4)   | 8028(3)    | 21.4(8)         |
| C13  | 7404(5)   | 9161(4)   | 8774(3)    | 23.7(8)         |
| C14  | 6451(6)   | 10166(4)  | 8703(3)    | 25.5(8)         |
| C15  | 5274(5)   | 10363(3)  | 7905(3)    | 22.6(8)         |
| C16  | 5154(5)   | 9569(3)   | 7198(3)    | 19.5(7)         |
| C17  | 3851(5)   | 9606(3)   | 6329(3)    | 19.4(7)         |
| C21  | 7164(5)   | 9122(3)   | 4767(3)    | 20.7(7)         |
| C22  | 5842(5)   | 8576(3)   | 4058(3)    | 20.8(8)         |
| C23  | 5537(6)   | 8847(4)   | 3120(3)    | 27.6(9)         |
| C24  | 4325(6)   | 8229(4)   | 2534(3)    | 28.6(9)         |
| C25  | 3395(6)   | 7378(4)   | 2901(3)    | 26.1(8)         |
| C26  | 3754(5)   | 7174(3)   | 3845(3)    | 20.6(8)         |
| C27  | 2822(5)   | 6320(3)   | 4353(3)    | 21.4(8)         |
| C31  | 6433(6)   | 4751(4)   | 5086(3)    | 25.5(8)         |
| C32  | 5438(6)   | 4372(4)   | 5834(3)    | 22.4(8)         |
| C33  | 4800(6)   | 3273(4)   | 5895(3)    | 24.9(8)         |

**Table S14 Fractional Atomic Coordinates ( $\times 10^4$ ) and Equivalent Isotropic Displacement Parameters ( $\text{\AA}^2 \times 10^3$ ) for [Sc(L<sup>003</sup>)].  $U_{\text{eq}}$  is defined as 1/3 of the trace of the orthogonalized  $U_{ij}$  tensor.**

| Atom | <i>x</i> | <i>y</i> | <i>z</i> | $U_{\text{eq}}$ |
|------|----------|----------|----------|-----------------|
| C34  | 3725(6)  | 3059(4)  | 6540(3)  | 27.1(9)         |
| C35  | 3335(5)  | 3947(4)  | 7100(3)  | 23.5(8)         |
| C36  | 4041(5)  | 5011(3)  | 6996(3)  | 19.1(7)         |
| C37  | 3600(5)  | 6070(3)  | 7490(3)  | 19.2(7)         |
| O1   | 9899(4)  | 1566(3)  | 5388(2)  | 30.6(7)         |
| O2   | 594(4)   | 3647(3)  | 4655(2)  | 32.3(7)         |
| O3   | 6952(5)  | 1855(3)  | 4070(3)  | 35.6(11)        |
| O3A  | 7730(60) | 1480(40) | 3690(30) | 36              |

**Table S15 Anisotropic Displacement Parameters ( $\text{\AA}^2 \times 10^3$ ) for [Sc(L<sup>003</sup>)]. The Anisotropic displacement factor exponent takes the form:  $-2\pi^2[h^2a^{*2}U_{11}+2hka^*b^*U_{12}+\dots]$ .**

| Atom | $U_{11}$ | $U_{22}$ | $U_{33}$ | $U_{23}$ | $U_{13}$ | $U_{12}$ |
|------|----------|----------|----------|----------|----------|----------|
| Sc1  | 14.5(3)  | 14.9(3)  | 18.0(3)  | 0.4(2)   | 1.8(2)   | 0.2(3)   |
| O11  | 21.3(14) | 19.8(13) | 21.4(12) | -0.4(10) | -0.1(11) | 2.6(10)  |
| O12  | 24.5(14) | 20.3(13) | 34.2(15) | -2.1(11) | -4.9(12) | 5.2(11)  |
| O21  | 18.9(13) | 21.5(13) | 21.9(12) | 2.2(10)  | -0.5(10) | -2.5(11) |
| O22  | 25.1(15) | 29.8(16) | 30.7(14) | -6.7(12) | -1.4(12) | -7.3(12) |
| O31  | 22.3(14) | 21.8(13) | 25.9(14) | -2.3(11) | 7.9(11)  | -2.1(11) |
| O32  | 22.2(14) | 30.9(14) | 19.5(13) | 1.2(11)  | 5.3(11)  | -1.7(11) |
| N1   | 19.7(17) | 20.9(16) | 21.0(15) | 2.0(12)  | 2.5(12)  | -2.3(12) |
| N4   | 19.4(16) | 17.1(15) | 20.6(14) | 1.6(12)  | 1.6(12)  | -0.4(12) |
| N7   | 21.7(17) | 23.7(16) | 22.1(15) | -1.2(13) | 4.0(13)  | 0.3(13)  |
| N11  | 17.4(15) | 19.5(15) | 19.0(14) | 1.7(12)  | 1.6(12)  | -0.3(12) |
| N21  | 18.9(16) | 18.2(15) | 21.6(15) | -0.7(12) | 1.6(13)  | 2.1(12)  |
| N31  | 16.2(15) | 20.6(15) | 16.1(13) | -0.3(11) | -1.5(11) | -0.6(12) |
| C2   | 19.6(19) | 25(2)    | 26.6(19) | 2.5(15)  | 0.9(15)  | -3.2(15) |
| C3   | 19.8(18) | 22.6(19) | 24.7(17) | -1.7(15) | 3.5(15)  | -3.4(14) |
| C5   | 27(2)    | 25.7(19) | 23.2(18) | 2.3(15)  | 5.5(16)  | 5.1(16)  |
| C6   | 28(2)    | 27(2)    | 22.1(18) | 0.4(15)  | 6.4(16)  | 3.1(17)  |
| C8   | 23(2)    | 27(2)    | 24.8(18) | 2.3(15)  | 2.9(16)  | -0.6(15) |
| C9   | 18.3(19) | 21.1(18) | 23.1(18) | 3.8(14)  | 0.2(14)  | 1.1(14)  |
| C11  | 18.2(19) | 22.4(19) | 22.8(18) | 3.9(14)  | -0.2(15) | 0.5(14)  |
| C12  | 18.5(18) | 24.2(19) | 21.5(17) | 2.3(14)  | 3.5(15)  | -1.0(15) |
| C13  | 23(2)    | 27(2)    | 20.7(17) | 1.7(15)  | 1.0(15)  | -1.8(15) |
| C14  | 27(2)    | 25.4(19) | 24.2(18) | -2.9(15) | 3.1(16)  | -3.7(16) |

**Table S15 Anisotropic Displacement Parameters ( $\text{\AA}^2 \times 10^3$ ) for  $[\text{Sc}(\text{L}^{003})]$ . The Anisotropic displacement factor exponent takes the form:  $-2\pi^2[h^2a^{*2}U_{11}+2hka^*b^*U_{12}+\dots]$ .**

| Atom | U <sub>11</sub> | U <sub>22</sub> | U <sub>33</sub> | U <sub>23</sub> | U <sub>13</sub> | U <sub>12</sub> |
|------|-----------------|-----------------|-----------------|-----------------|-----------------|-----------------|
| C15  | 24.1(19)        | 18.2(17)        | 25.4(18)        | -0.6(14)        | 3.8(15)         | 0.5(14)         |
| C16  | 16.2(17)        | 19.9(17)        | 21.9(17)        | 2.1(14)         | 1.7(14)         | -1.8(14)        |
| C17  | 18.9(18)        | 15.5(17)        | 23.0(17)        | 0.4(14)         | 1.2(14)         | 0.7(14)         |
| C21  | 19.7(18)        | 18.2(17)        | 24.7(18)        | 2.4(14)         | 4.8(15)         | -1.3(14)        |
| C22  | 19.4(19)        | 20.4(17)        | 23.1(18)        | 3.8(14)         | 5.0(15)         | 3.6(14)         |
| C23  | 30(2)           | 31(2)           | 21.8(19)        | 5.5(16)         | 4.0(17)         | 1.3(17)         |
| C24  | 29(2)           | 37(2)           | 18.5(17)        | 3.1(16)         | 1.8(16)         | 6.0(18)         |
| C25  | 26(2)           | 30(2)           | 20.9(18)        | -3.7(15)        | 0.1(16)         | 3.0(16)         |
| C26  | 18.6(19)        | 19.9(18)        | 22.5(18)        | -1.5(14)        | 0.4(15)         | 5.0(14)         |
| C27  | 15.8(17)        | 21.0(19)        | 26.1(18)        | -2.0(15)        | -0.6(14)        | 3.5(14)         |
| C31  | 26(2)           | 28(2)           | 23.0(18)        | -2.4(15)        | 4.1(16)         | 0.5(16)         |
| C32  | 20.0(17)        | 25.8(19)        | 20.7(18)        | -2.5(14)        | 1.0(15)         | -0.2(16)        |
| C33  | 25.2(19)        | 22.0(19)        | 25.2(18)        | -3.9(15)        | -3.4(16)        | -0.2(16)        |
| C34  | 32(2)           | 22.5(19)        | 23.7(18)        | 6.4(15)         | -6.9(16)        | -5.5(16)        |
| C35  | 22(2)           | 24.0(19)        | 23.0(17)        | 4.2(14)         | 0.2(15)         | -3.0(15)        |
| C36  | 16.3(17)        | 23.2(18)        | 16.3(16)        | 2.4(14)         | -1.9(13)        | -2.6(14)        |
| C37  | 13.5(17)        | 23.0(17)        | 20.3(16)        | -1.2(14)        | 0.7(14)         | -0.8(14)        |
| O1   | 26.5(16)        | 35.0(17)        | 28.7(14)        | 5.9(12)         | -0.7(12)        | 4.2(13)         |
| O2   | 31.0(17)        | 32.2(16)        | 31.5(16)        | 2.4(13)         | -1.6(13)        | -0.3(13)        |
| O3   | 27(2)           | 36(2)           | 38(2)           | 12.5(16)        | -9.6(16)        | -6.7(16)        |

**Table S16 Bond Lengths for  $[\text{Sc}(\text{L}^{003})]$ .**

| Atom | Atom | Length/ $\text{\AA}$ | Atom | Atom | Length/ $\text{\AA}$ |
|------|------|----------------------|------|------|----------------------|
| Sc1  | O11  | 2.199(3)             | N21  | C22  | 1.346(5)             |
| Sc1  | O21  | 2.235(3)             | N21  | C26  | 1.336(5)             |
| Sc1  | O31  | 2.184(3)             | N31  | C32  | 1.338(5)             |
| Sc1  | N1   | 2.557(3)             | N31  | C36  | 1.336(5)             |
| Sc1  | N4   | 2.553(3)             | C2   | C3   | 1.524(6)             |
| Sc1  | N7   | 2.581(3)             | C5   | C6   | 1.517(6)             |
| Sc1  | N11  | 2.435(3)             | C8   | C9   | 1.515(6)             |
| Sc1  | N21  | 2.402(3)             | C11  | C12  | 1.502(6)             |
| Sc1  | N31  | 2.441(3)             | C12  | C13  | 1.398(6)             |
| O11  | C17  | 1.264(5)             | C13  | C14  | 1.392(6)             |
| O12  | C17  | 1.250(5)             | C14  | C15  | 1.395(6)             |
| O21  | C27  | 1.267(5)             | C15  | C16  | 1.384(5)             |
| O22  | C27  | 1.243(5)             | C16  | C17  | 1.508(5)             |

**Table S16 Bond Lengths for [Sc(L<sup>003</sup>)].**

| Atom | Atom | Length/Å | Atom | Atom | Length/Å |
|------|------|----------|------|------|----------|
| O31  | C37  | 1.262(5) | C21  | C22  | 1.498(6) |
| O32  | C37  | 1.250(5) | C22  | C23  | 1.394(6) |
| N1   | C2   | 1.517(5) | C23  | C24  | 1.387(7) |
| N1   | C9   | 1.480(5) | C24  | C25  | 1.396(7) |
| N1   | C11  | 1.478(5) | C25  | C26  | 1.389(6) |
| N4   | C3   | 1.485(5) | C26  | C27  | 1.506(6) |
| N4   | C5   | 1.506(5) | C31  | C32  | 1.512(6) |
| N4   | C21  | 1.475(5) | C32  | C33  | 1.389(6) |
| N7   | C6   | 1.478(5) | C33  | C34  | 1.390(7) |
| N7   | C8   | 1.525(5) | C34  | C35  | 1.388(6) |
| N7   | C31  | 1.476(5) | C35  | C36  | 1.382(6) |
| N11  | C12  | 1.333(5) | C36  | C37  | 1.503(5) |
| N11  | C16  | 1.341(5) |      |      |          |

**Table S17 Bond Angles for [Sc(L<sup>003</sup>)].**

| Atom | Atom | Atom | Angle/°    | Atom | Atom | Atom | Angle/°  |
|------|------|------|------------|------|------|------|----------|
| O11  | Sc1  | O21  | 82.31(11)  | C31  | N7   | C8   | 108.1(3) |
| O11  | Sc1  | N1   | 128.05(11) | C12  | N11  | Sc1  | 122.3(3) |
| O11  | Sc1  | N4   | 91.46(11)  | C12  | N11  | C16  | 119.1(3) |
| O11  | Sc1  | N7   | 148.68(11) | C16  | N11  | Sc1  | 117.2(3) |
| O11  | Sc1  | N11  | 67.18(11)  | C22  | N21  | Sc1  | 122.3(3) |
| O11  | Sc1  | N21  | 68.88(11)  | C26  | N21  | Sc1  | 118.3(3) |
| O11  | Sc1  | N31  | 137.64(11) | C26  | N21  | C22  | 119.4(4) |
| O21  | Sc1  | N1   | 147.86(11) | C32  | N31  | Sc1  | 122.4(3) |
| O21  | Sc1  | N4   | 128.45(11) | C36  | N31  | Sc1  | 116.1(3) |
| O21  | Sc1  | N7   | 92.10(11)  | C36  | N31  | C32  | 118.4(3) |
| O21  | Sc1  | N11  | 137.41(12) | N1   | C2   | C3   | 113.6(3) |
| O21  | Sc1  | N21  | 66.49(11)  | N4   | C3   | C2   | 110.5(3) |
| O21  | Sc1  | N31  | 65.28(10)  | N4   | C5   | C6   | 114.7(3) |
| O31  | Sc1  | O11  | 82.23(11)  | N7   | C6   | C5   | 110.6(3) |
| O31  | Sc1  | O21  | 81.36(11)  | C9   | C8   | N7   | 113.1(3) |
| O31  | Sc1  | N1   | 91.68(11)  | N1   | C9   | C8   | 110.6(3) |
| O31  | Sc1  | N4   | 148.59(11) | N1   | C11  | C12  | 108.3(3) |
| O31  | Sc1  | N7   | 127.56(11) | N11  | C12  | C11  | 114.0(3) |
| O31  | Sc1  | N11  | 66.19(11)  | N11  | C12  | C13  | 122.0(4) |
| O31  | Sc1  | N21  | 138.73(12) | C13  | C12  | C11  | 124.0(4) |
| O31  | Sc1  | N31  | 67.16(11)  | C14  | C13  | C12  | 118.6(4) |



**Table S17 Bond Angles for [Sc(L<sup>003</sup>)].**

| Atom | Atom | Atom | Angle/°    | Atom | Atom | Atom | Angle/°  |
|------|------|------|------------|------|------|------|----------|
| N1   | Sc1  | N7   | 67.42(11)  | C13  | C14  | C15  | 119.0(4) |
| N4   | Sc1  | N1   | 68.15(11)  | C16  | C15  | C14  | 118.4(4) |
| N4   | Sc1  | N7   | 68.03(11)  | N11  | C16  | C15  | 122.6(4) |
| N11  | Sc1  | N1   | 63.34(11)  | N11  | C16  | C17  | 112.5(3) |
| N11  | Sc1  | N4   | 82.96(11)  | C15  | C16  | C17  | 124.8(4) |
| N11  | Sc1  | N7   | 129.28(12) | O11  | C17  | C16  | 115.7(3) |
| N11  | Sc1  | N31  | 120.20(11) | O12  | C17  | O11  | 125.9(4) |
| N21  | Sc1  | N1   | 129.25(12) | O12  | C17  | C16  | 118.3(3) |
| N21  | Sc1  | N4   | 63.63(11)  | N4   | C21  | C22  | 107.1(3) |
| N21  | Sc1  | N7   | 80.59(11)  | N21  | C22  | C21  | 113.2(3) |
| N21  | Sc1  | N11  | 122.94(11) | N21  | C22  | C23  | 121.2(4) |
| N21  | Sc1  | N31  | 116.71(11) | C23  | C22  | C21  | 125.5(4) |
| N31  | Sc1  | N1   | 83.05(11)  | C24  | C23  | C22  | 119.2(4) |
| N31  | Sc1  | N4   | 129.77(11) | C23  | C24  | C25  | 119.3(4) |
| N31  | Sc1  | N7   | 63.06(11)  | C26  | C25  | C24  | 117.9(4) |
| C17  | O11  | Sc1  | 127.1(2)   | N21  | C26  | C25  | 122.9(4) |
| C27  | O21  | Sc1  | 125.1(3)   | N21  | C26  | C27  | 112.6(4) |
| C37  | O31  | Sc1  | 127.6(3)   | C25  | C26  | C27  | 124.5(4) |
| C2   | N1   | Sc1  | 114.2(2)   | O21  | C27  | C26  | 113.9(3) |
| C9   | N1   | Sc1  | 108.6(2)   | O22  | C27  | O21  | 126.7(4) |
| C9   | N1   | C2   | 110.9(3)   | O22  | C27  | C26  | 119.4(4) |
| C11  | N1   | Sc1  | 107.7(2)   | N7   | C31  | C32  | 110.0(3) |
| C11  | N1   | C2   | 107.5(3)   | N31  | C32  | C31  | 113.5(3) |
| C11  | N1   | C9   | 107.7(3)   | N31  | C32  | C33  | 122.5(4) |
| C3   | N4   | Sc1  | 108.1(2)   | C33  | C32  | C31  | 123.7(4) |
| C3   | N4   | C5   | 108.6(3)   | C32  | C33  | C34  | 118.6(4) |
| C5   | N4   | Sc1  | 114.4(2)   | C35  | C34  | C33  | 118.9(4) |
| C21  | N4   | Sc1  | 106.2(2)   | C36  | C35  | C34  | 118.5(4) |
| C21  | N4   | C3   | 110.8(3)   | N31  | C36  | C35  | 123.0(4) |
| C21  | N4   | C5   | 108.7(3)   | N31  | C36  | C37  | 112.6(3) |
| C6   | N7   | Sc1  | 108.4(2)   | C35  | C36  | C37  | 124.1(4) |
| C6   | N7   | C8   | 109.3(3)   | O31  | C37  | C36  | 115.1(3) |
| C8   | N7   | Sc1  | 114.2(2)   | O32  | C37  | O31  | 124.8(4) |
| C31  | N7   | Sc1  | 107.7(2)   | O32  | C37  | C36  | 120.1(4) |
| C31  | N7   | C6   | 109.1(3)   |      |      |      |          |

**Table S18 Hydrogen Bonds for [Sc(L<sup>003</sup>)].**

| D  | H   | A                | d(D-H)/Å | d(H-A)/Å | d(D-A)/Å | D-H-A/° |
|----|-----|------------------|----------|----------|----------|---------|
| O1 | H1A | O2 <sup>1</sup>  | 0.87     | 1.90     | 2.751(5) | 167.2   |
| O1 | H1B | O12 <sup>2</sup> | 0.87     | 1.93     | 2.784(4) | 166.7   |
| O2 | H2C | O22              | 0.87     | 1.97     | 2.801(5) | 158.9   |
| O2 | H2D | O32 <sup>3</sup> | 0.87     | 2.01     | 2.854(4) | 163.8   |
| O3 | H3C | O1               | 0.87     | 1.94     | 2.807(5) | 170.7   |
| O3 | H3D | O32 <sup>4</sup> | 0.87     | 2.11     | 2.977(5) | 177.1   |

<sup>1</sup>1+X,+Y,+Z; <sup>2</sup>1+X,-1+Y,+Z; <sup>3</sup>-1/2+X,1-Y,-1/2+Z; <sup>4</sup>1/2+X,1-Y,-1/2+Z

**Table S19 Torsion Angles for [Sc(L<sup>003</sup>)].**

| A   | B   | C   | D   | Angle/°   | A   | B   | C   | D   | Angle/°   |
|-----|-----|-----|-----|-----------|-----|-----|-----|-----|-----------|
| Sc1 | O11 | C17 | O12 | -171.2(3) | C3  | N4  | C21 | C22 | -173.1(3) |
| Sc1 | O11 | C17 | C16 | 6.3(5)    | C5  | N4  | C3  | C2  | -68.0(4)  |
| Sc1 | O21 | C27 | O22 | 157.9(3)  | C5  | N4  | C21 | C22 | 67.6(4)   |
| Sc1 | O21 | C27 | C26 | -22.4(4)  | C6  | N7  | C8  | C9  | 132.9(3)  |
| Sc1 | O31 | C37 | O32 | 176.0(3)  | C6  | N7  | C31 | C32 | -167.1(3) |
| Sc1 | O31 | C37 | C36 | -5.2(5)   | C8  | N7  | C6  | C5  | -70.6(4)  |
| Sc1 | N1  | C2  | C3  | 11.0(4)   | C8  | N7  | C31 | C32 | 74.2(4)   |
| Sc1 | N1  | C9  | C8  | 57.7(3)   | C9  | N1  | C2  | C3  | 134.1(3)  |
| Sc1 | N1  | C11 | C12 | -52.5(3)  | C9  | N1  | C11 | C12 | -169.5(3) |
| Sc1 | N4  | C3  | C2  | 56.7(4)   | C11 | N1  | C2  | C3  | -108.4(4) |
| Sc1 | N4  | C5  | C6  | 12.8(4)   | C11 | N1  | C9  | C8  | 174.1(3)  |
| Sc1 | N4  | C21 | C22 | -56.0(3)  | C11 | C12 | C13 | C14 | -174.8(4) |
| Sc1 | N7  | C6  | C5  | 54.5(4)   | C12 | N11 | C16 | C15 | 5.4(6)    |
| Sc1 | N7  | C8  | C9  | 11.2(4)   | C12 | N11 | C16 | C17 | -170.6(3) |
| Sc1 | N7  | C31 | C32 | -49.6(4)  | C12 | C13 | C14 | C15 | 2.0(6)    |
| Sc1 | N11 | C12 | C11 | 5.1(5)    | C13 | C14 | C15 | C16 | -2.7(6)   |
| Sc1 | N11 | C12 | C13 | -172.4(3) | C14 | C15 | C16 | N11 | -1.0(6)   |
| Sc1 | N11 | C16 | C15 | 172.4(3)  | C14 | C15 | C16 | C17 | 174.6(4)  |
| Sc1 | N11 | C16 | C17 | -3.7(4)   | C15 | C16 | C17 | O11 | -177.0(4) |
| Sc1 | N21 | C22 | C21 | 1.4(4)    | C15 | C16 | C17 | O12 | 0.8(6)    |
| Sc1 | N21 | C22 | C23 | 179.3(3)  | C16 | N11 | C12 | C11 | 171.3(3)  |
| Sc1 | N21 | C26 | C25 | -178.1(3) | C16 | N11 | C12 | C13 | -6.2(6)   |
| Sc1 | N21 | C26 | C27 | 2.9(4)    | C21 | N4  | C3  | C2  | 172.6(3)  |
| Sc1 | N31 | C32 | C31 | 12.5(5)   | C21 | N4  | C5  | C6  | -105.8(4) |
| Sc1 | N31 | C32 | C33 | -161.7(3) | C21 | C22 | C23 | C24 | 176.8(4)  |
| Sc1 | N31 | C36 | C35 | 162.4(3)  | C22 | N21 | C26 | C25 | 3.0(6)    |

**Table S19 Torsion Angles for [Sc(L<sup>003</sup>)].**

| A   | B   | C   | D   | Angle/°   | A   | B   | C   | D   | Angle/°   |
|-----|-----|-----|-----|-----------|-----|-----|-----|-----|-----------|
| Sc1 | N31 | C36 | C37 | -12.5(4)  | C22 | N21 | C26 | C27 | -176.1(3) |
| N1  | C2  | C3  | N4  | -45.7(5)  | C22 | C23 | C24 | C25 | 2.2(7)    |
| N1  | C11 | C12 | N11 | 33.3(5)   | C23 | C24 | C25 | C26 | -1.1(7)   |
| N1  | C11 | C12 | C13 | -149.2(4) | C24 | C25 | C26 | N21 | -1.5(6)   |
| N4  | C5  | C6  | N7  | -45.9(5)  | C24 | C25 | C26 | C27 | 177.5(4)  |
| N4  | C21 | C22 | N21 | 38.3(4)   | C25 | C26 | C27 | O21 | -168.0(4) |
| N4  | C21 | C22 | C23 | -139.4(4) | C25 | C26 | C27 | O22 | 11.7(6)   |
| N7  | C8  | C9  | N1  | -46.1(4)  | C26 | N21 | C22 | C21 | -179.6(3) |
| N7  | C31 | C32 | N31 | 27.2(5)   | C26 | N21 | C22 | C23 | -1.8(6)   |
| N7  | C31 | C32 | C33 | -158.6(4) | C31 | N7  | C6  | C5  | 171.5(3)  |
| N11 | C12 | C13 | C14 | 2.4(6)    | C31 | N7  | C8  | C9  | -108.5(4) |
| N11 | C16 | C17 | O11 | -1.0(5)   | C31 | C32 | C33 | C34 | -172.1(4) |
| N11 | C16 | C17 | O12 | 176.7(4)  | C32 | N31 | C36 | C35 | 1.6(6)    |
| N21 | C22 | C23 | C24 | -0.8(6)   | C32 | N31 | C36 | C37 | -173.3(3) |
| N21 | C26 | C27 | O21 | 11.0(5)   | C32 | C33 | C34 | C35 | -0.2(6)   |
| N21 | C26 | C27 | O22 | -169.3(4) | C33 | C34 | C35 | C36 | -0.4(6)   |
| N31 | C32 | C33 | C34 | 1.5(6)    | C34 | C35 | C36 | N31 | -0.3(6)   |
| N31 | C36 | C37 | O31 | 11.7(5)   | C34 | C35 | C36 | C37 | 174.0(4)  |
| N31 | C36 | C37 | O32 | -169.3(3) | C35 | C36 | C37 | O31 | -163.1(4) |
| C2  | N1  | C9  | C8  | -68.5(4)  | C35 | C36 | C37 | O32 | 15.9(6)   |
| C2  | N1  | C11 | C12 | 71.0(4)   | C36 | N31 | C32 | C31 | 172.0(3)  |
| C3  | N4  | C5  | C6  | 133.6(4)  | C36 | N31 | C32 | C33 | -2.2(6)   |

**Table S20 Hydrogen Atom Coordinates ( $\text{\AA} \times 10^4$ ) and Isotropic Displacement Parameters ( $\text{\AA}^2 \times 10^3$ ) for [Sc(L<sup>003</sup>)].**

| Atom | x        | y       | z       | U(eq) |
|------|----------|---------|---------|-------|
| H2A  | 10602.31 | 7282.21 | 6634.54 | 29    |
| H2B  | 10293.19 | 8114.59 | 7457.9  | 29    |
| H3A  | 8523.16  | 9288.43 | 6480.61 | 27    |
| H3B  | 10113.89 | 9038.89 | 5954.88 | 27    |
| H5A  | 10078.78 | 7292.09 | 5219.89 | 30    |
| H5B  | 9122.05  | 7824.63 | 4274.78 | 30    |
| H6A  | 7142.87  | 6386.1  | 4078.66 | 31    |
| H6B  | 8945.24  | 5760.73 | 4377.17 | 31    |
| H8A  | 9063.25  | 4547.33 | 6088.27 | 30    |
| H8B  | 10039.48 | 5711    | 5933.2  | 30    |
| H9A  | 7971.06  | 5281.11 | 7322.85 | 25    |

**Table S20 Hydrogen Atom Coordinates ( $\text{\AA}\times 10^4$ ) and Isotropic Displacement Parameters ( $\text{\AA}^2\times 10^3$ ) for  $[\text{Sc}(\text{L}^{003})]$ .**

| Atom | x        | y        | z       | U(eq) |
|------|----------|----------|---------|-------|
| H9B  | 9942.16  | 5655.18  | 7483.34 | 25    |
| H11A | 9117.91  | 7255.66  | 8469.68 | 26    |
| H11B | 7269.63  | 6662.16  | 8258.93 | 26    |
| H13  | 8187.16  | 8994.89  | 9317.61 | 28    |
| H14  | 6600.62  | 10710.22 | 9189.98 | 31    |
| H15  | 4572.54  | 11025.31 | 7849.1  | 27    |
| H21A | 8046.88  | 9502.53  | 4464.49 | 25    |
| H21B | 6629.22  | 9702     | 5122.76 | 25    |
| H23  | 6153.07  | 9447.23  | 2885.24 | 33    |
| H24  | 4129.72  | 8384.54  | 1889.75 | 34    |
| H25  | 2542.4   | 6951.3   | 2516.39 | 31    |
| H31A | 7193.26  | 4124.91  | 4945.92 | 31    |
| H31B | 5632.02  | 4930.75  | 4515.73 | 31    |
| H33  | 5091.52  | 2680.98  | 5504.64 | 30    |
| H34  | 3265.78  | 2317.59  | 6597.26 | 33    |
| H35  | 2597.97  | 3826.94  | 7544.11 | 28    |
| H1A  | 10250.34 | 2229.18  | 5225.25 | 46    |
| H1B  | 10831.55 | 1178.77  | 5560.72 | 46    |
| H2C  | 1085.25  | 4295.04  | 4569.87 | 48    |
| H2D  | -271.03  | 3612.41  | 4210.2  | 48    |
| H3C  | 7835.39  | 1684.31  | 4478.57 | 53    |
| H3D  | 7248.39  | 2474.5   | 3808.07 | 53    |

**Table S21 Atomic Occupancy for  $[\text{Sc}(\text{L}^{003})]$ .**

| Atom | Occupancy | Atom | Occupancy | Atom | Occupancy |
|------|-----------|------|-----------|------|-----------|
| O3   | 0.909(9)  | H3C  | 0.909(9)  | H3D  | 0.909(9)  |
| O3A  | 0.091(9)  |      |           |      |           |

#### 4 DFT Atomic Coordinates

| Table S22 Atomic coordinates (x,y,z) of [Sc(L <sup>300</sup> )] isomers. |             |             |             |                           |             |             |
|--------------------------------------------------------------------------|-------------|-------------|-------------|---------------------------|-------------|-------------|
| [Sc(L <sup>300</sup> )] Δ                                                |             |             |             | [Sc(L <sup>300</sup> )] Λ |             |             |
| Sc                                                                       | 0.00000000  | 0.00000000  | 0.00000000  | Sc                        | 0.00000000  | 0.00000000  |
| N                                                                        | 0.01303300  | -0.00278700 | 2.37235300  | N                         | -0.02086300 | -0.00585000 |
| C                                                                        | 1.39751000  | -0.00498300 | 2.93407000  | C                         | 1.35407000  | -0.04558200 |
| C                                                                        | 2.45182200  | 0.34426600  | 1.89034300  | C                         | 2.41452900  | -0.41871200 |
| N                                                                        | 2.25340400  | -0.43677300 | 0.64311600  | N                         | 2.25468100  | 0.37432500  |
| C                                                                        | 2.50436500  | -1.89539700 | 0.84202400  | C                         | 2.54944800  | 1.82197400  |
| C                                                                        | 1.40985000  | -2.76241100 | 0.23191200  | C                         | 1.49135200  | 2.72465600  |
| N                                                                        | 0.06079700  | -2.28686100 | 0.63067700  | N                         | 0.12308100  | 2.28341800  |
| C                                                                        | -0.19240800 | -2.46913700 | 2.09240400  | C                         | -0.15050900 | 2.46729800  |
| C                                                                        | -0.75432600 | -1.21552500 | 2.75395200  | C                         | -0.75877400 | 1.22765100  |
| H                                                                        | -0.76679100 | -1.35298700 | 3.84975200  | H                         | -0.78570400 | 1.36059900  |
| H                                                                        | -1.78934200 | -1.05422900 | 2.42422800  | H                         | -1.79242300 | 1.09753500  |
| H                                                                        | 0.74222000  | -2.77630800 | 2.57536300  | H                         | 0.78419400  | 2.74715700  |
| H                                                                        | -0.90381500 | -3.29403500 | 2.24854700  | H                         | -0.84137600 | 3.31114600  |
| C                                                                        | -1.00129900 | -2.91216100 | -0.18273900 | C                         | -0.90447300 | 2.94309400  |
| C                                                                        | -2.20586300 | -1.98593900 | -0.33710100 | C                         | -2.13620700 | 2.05785000  |
| O                                                                        | -3.33885900 | -2.44033700 | -0.49895500 | O                         | -3.24925100 | 2.55123000  |
| O                                                                        | -1.91549900 | -0.70941000 | -0.34005200 | O                         | -1.89036500 | 0.77210100  |
| H                                                                        | -0.61308000 | -3.07153100 | -1.20134600 | H                         | -0.49313200 | 3.09106400  |
| H                                                                        | -1.31283800 | -3.88801800 | 0.22010700  | H                         | -1.19075200 | 3.92835300  |
| H                                                                        | 1.56626200  | -3.81524600 | 0.52696400  | H                         | 1.67144500  | 3.77042100  |
| H                                                                        | 1.45667200  | -2.70915400 | -0.86426400 | H                         | 1.55575100  | 2.67883100  |
| H                                                                        | 2.59711900  | -2.09347900 | 1.91601300  | H                         | 2.63096700  | 2.00948000  |
| H                                                                        | 3.46891600  | -2.17517700 | 0.39194300  | H                         | 3.52961000  | 2.07335500  |
| C                                                                        | 3.05848300  | 0.10113200  | -0.47255500 | C                         | 3.05521900  | -0.18162100 |
| C                                                                        | 2.36433800  | -0.10168700 | -1.81712400 | C                         | 2.38541900  | 0.05731600  |
| O                                                                        | 3.01074300  | -0.23920400 | -2.85576300 | O                         | 3.04965900  | 0.19093900  |
| O                                                                        | 1.05611700  | -0.05468300 | -1.76528700 | O                         | 1.07532700  | 0.04568500  |
| H                                                                        | 4.07335500  | -0.32405100 | -0.49404000 | H                         | 4.08418200  | 0.20883000  |
| H                                                                        | 3.14812600  | 1.19163700  | -0.34496400 | H                         | 3.10541500  | -1.27562400 |
| H                                                                        | 3.45830700  | 0.17672700  | 2.31332100  | H                         | 3.41877900  | -0.28037900 |
| H                                                                        | 2.37257000  | 1.40534200  | 1.61806300  | H                         | 2.31034800  | -1.47586700 |
| H                                                                        | 1.59929500  | -0.99044200 | 3.36959700  | H                         | 1.57518000  | 0.93110100  |
| H                                                                        | 1.46801800  | 0.71804200  | 3.76078400  | H                         | 1.39070500  | -0.77530600 |
| C                                                                        | -0.71524300 | 1.23097800  | 2.73196900  | C                         | -0.78962600 | -1.21905200 |
| C                                                                        | -0.39805900 | 2.37471700  | 1.77111800  | C                         | -0.49080400 | -2.36853500 |
| O                                                                        | -0.43363100 | 3.54789100  | 2.14365600  | O                         | -0.59090700 | -3.54157100 |
| O                                                                        | -0.15580300 | 1.99833600  | 0.54091800  | O                         | -0.19208100 | -1.99451100 |
| H                                                                        | -0.52702200 | 1.53647600  | 3.77252400  | H                         | -0.62680400 | -1.53285600 |
| H                                                                        | -1.79499800 | 1.04252300  | 2.62253400  | H                         | -1.86196600 | -0.99996400 |

**Table S23** Atomic coordinates (x,y,z) of [ScF(L<sup>300</sup>)]<sup>-</sup> isomers.

| [ScF(L <sup>300</sup> )] <sup>-</sup> Δ |             |             |             | [ScF(L <sup>300</sup> )] <sup>-</sup> Λ |             |             |             |
|-----------------------------------------|-------------|-------------|-------------|-----------------------------------------|-------------|-------------|-------------|
| Sc                                      | 0.00000000  | 0.00000000  | 0.00000000  | Sc                                      | 0.00000000  | 0.00000000  | 0.00000000  |
| N                                       | 0.01038900  | 0.01706600  | 2.48025900  | N                                       | 0.02581500  | -0.00491300 | 2.48438200  |
| C                                       | 1.37596500  | 0.01119100  | 3.08005600  | C                                       | 1.39480600  | 0.00000700  | 3.07562800  |
| C                                       | 2.48139700  | 0.29544400  | 2.06784300  | C                                       | 2.49281600  | -0.29189000 | 2.05754700  |
| N                                       | 2.27742300  | -0.50155000 | 0.84334500  | N                                       | 2.28367000  | 0.50025900  | 0.83079600  |
| C                                       | 2.50436700  | -1.95483500 | 1.09406000  | C                                       | 2.51630000  | 1.95405200  | 1.07312100  |
| C                                       | 1.41109900  | -2.85054400 | 0.51703600  | C                                       | 1.42190600  | 2.85017200  | 0.49873900  |
| N                                       | 0.07318400  | -2.31454900 | 0.83679800  | N                                       | 0.08464500  | 2.31900500  | 0.82878300  |
| C                                       | -0.23658200 | -2.43629500 | 2.29300800  | C                                       | -0.21544100 | 2.44795900  | 2.28631400  |
| C                                       | -0.77948600 | -1.15085500 | 2.91526700  | C                                       | -0.75857000 | 1.16715200  | 2.91759600  |
| H                                       | -0.77434700 | -1.25671300 | 4.01637600  | H                                       | -0.74761300 | 1.27868100  | 4.01814200  |
| H                                       | -1.81547600 | -0.98085900 | 2.60220900  | H                                       | -1.79665400 | 0.99845000  | 2.61065100  |
| H                                       | 0.67337400  | -2.75066700 | 2.81772400  | H                                       | 0.69901000  | 2.76133000  | 2.80371600  |
| H                                       | -0.97095300 | -3.24214600 | 2.45212900  | H                                       | -0.94592700 | 3.25708500  | 2.44679000  |
| C                                       | -0.98638500 | -2.93830500 | 0.03338600  | C                                       | -0.97851700 | 2.94190500  | 0.02948500  |
| C                                       | -2.23415400 | -2.05525600 | 0.05848500  | C                                       | -2.22789600 | 2.06142400  | 0.06483800  |
| O                                       | -3.36077600 | -2.55085500 | -0.08099100 | O                                       | -3.35433300 | 2.55890500  | -0.06885100 |
| O                                       | -1.99395700 | -0.78882300 | 0.19722900  | O                                       | -1.98968700 | 0.79462800  | 0.20478600  |
| H                                       | -0.65135100 | -2.99028300 | -1.01558800 | H                                       | -0.64970500 | 2.98947100  | -1.02166900 |
| H                                       | -1.22986100 | -3.96103800 | 0.36755700  | H                                       | -1.21809600 | 3.96629100  | 0.36141600  |
| H                                       | 1.54093200  | -3.87536600 | 0.91249300  | H                                       | 1.55683000  | 3.87630400  | 0.88912100  |
| H                                       | 1.49187000  | -2.90242900 | -0.57467900 | H                                       | 1.49636900  | 2.89725200  | -0.59363000 |
| H                                       | 2.58007500  | -2.11276200 | 2.17635500  | H                                       | 2.59975300  | 2.11709100  | 2.15409900  |
| H                                       | 3.47514000  | -2.26240200 | 0.67290900  | H                                       | 3.48520100  | 2.25664800  | 0.64410600  |
| C                                       | 3.10788800  | -0.03297900 | -0.27235800 | C                                       | 3.10677800  | 0.02440600  | -0.28727300 |
| C                                       | 2.53125800  | -0.53736800 | -1.59365000 | C                                       | 2.52480300  | 0.52523100  | -1.60756400 |
| O                                       | 3.26586700  | -0.72877200 | -2.57214600 | O                                       | 3.25489400  | 0.71078200  | -2.59060500 |
| O                                       | 1.24496500  | -0.69927400 | -1.59408600 | O                                       | 1.23909500  | 0.69120700  | -1.60201400 |
| H                                       | 4.16488900  | -0.33338100 | -0.17335400 | H                                       | 4.16529300  | 0.32164400  | -0.19510200 |
| H                                       | 3.06611100  | 1.06801100  | -0.30582900 | H                                       | 3.06110200  | -1.07658800 | -0.31609800 |
| H                                       | 3.46069000  | 0.07878100  | 2.53461500  | H                                       | 3.47585100  | -0.07650100 | 2.51700700  |
| H                                       | 2.47774200  | 1.35198600  | 1.77741700  | H                                       | 2.48385300  | -1.34969200 | 1.77168500  |
| H                                       | 1.54608100  | -0.96413600 | 3.55101400  | H                                       | 1.57050500  | 0.97693100  | 3.54125800  |
| H                                       | 1.43406300  | 0.75506200  | 3.89103500  | H                                       | 1.45620200  | -0.74050300 | 3.88948700  |
| C                                       | -0.66674600 | 1.28966400  | 2.75809800  | C                                       | -0.65332800 | -1.27421800 | 2.77177500  |
| C                                       | -0.08256900 | 2.38899100  | 1.87077400  | C                                       | -0.07798700 | -2.37914200 | 1.88556300  |
| O                                       | -0.08974000 | 3.57054200  | 2.24063300  | O                                       | -0.08403600 | -3.55869300 | 2.26163200  |
| O                                       | 0.36199000  | 1.97664100  | 0.72402300  | O                                       | 0.35846100  | -1.97356700 | 0.73312100  |
| H                                       | -0.61213800 | 1.58101800  | 3.82058400  | H                                       | -0.59312900 | -1.56143900 | 3.83510800  |
| H                                       | -1.72962400 | 1.19195200  | 2.48259200  | H                                       | -1.71753700 | -1.17450300 | 2.50223400  |
| F                                       | -0.85696900 | 0.98718600  | -1.46991100 | F                                       | -0.86281700 | -0.99047800 | -1.46413400 |

| Table S24 Atomic coordinates (x,y,z) of [Sc(OH <sub>2</sub> )(L <sup>300</sup> )] isomers. |            |            |            |                                             |            |            |            |
|--------------------------------------------------------------------------------------------|------------|------------|------------|---------------------------------------------|------------|------------|------------|
| [Sc(OH <sub>2</sub> )(L <sup>300</sup> )] Δ                                                |            |            |            | [Sc(OH <sub>2</sub> )(L <sup>300</sup> )] Λ |            |            |            |
| Sc                                                                                         | 0.00000000 | 0.00000000 | 0.00000000 | Sc                                          | 0.00000000 | 0.00000000 | 0.00000000 |

|   |             |             |             |   |             |             |             |
|---|-------------|-------------|-------------|---|-------------|-------------|-------------|
| N | -1.03026300 | 1.35285600  | 1.69220100  | N | -1.61386900 | 0.30810900  | 1.73521900  |
| C | -0.05372600 | 1.84927300  | 2.70958500  | C | -1.52133300 | -0.73680900 | 2.80174900  |
| C | 1.39763900  | 1.66495100  | 2.28018700  | C | -0.64637400 | -1.92224600 | 2.40334700  |
| N | 1.61303400  | 0.30427200  | 1.73607700  | N | 0.61834500  | -1.45280600 | 1.79282700  |
| C | 1.51733600  | -0.74084000 | 2.80216800  | C | 1.51003100  | -0.80295100 | 2.80165900  |
| C | 0.63968300  | -1.92402100 | 2.40296100  | C | 2.08813400  | 0.52261300  | 2.31644300  |
| N | -0.62361500 | -1.45139400 | 1.79201600  | N | 1.03144400  | 1.35052300  | 1.69285300  |
| C | -1.51434800 | -0.79965000 | 2.80048900  | C | 0.05551100  | 1.84921900  | 2.70971500  |
| C | -2.08912700 | 0.52734200  | 2.31521200  | C | -1.39594400 | 1.66841800  | 2.27919900  |
| H | -2.56001500 | 1.05326500  | 3.16510800  | H | -2.05876700 | 1.86598300  | 3.14072900  |
| H | -2.86157200 | 0.35895900  | 1.55620500  | H | -1.65381700 | 2.38137700  | 1.48735500  |
| H | -0.94116500 | -0.64949100 | 3.72261200  | H | 0.23737600  | 1.32061100  | 3.65267900  |
| H | -2.34321000 | -1.47601000 | 3.06046400  | H | 0.23824600  | 2.91564000  | 2.91379600  |
| C | -1.33978300 | -2.52420200 | 1.08148400  | C | 1.58820600  | 2.46641200  | 0.91007900  |
| C | -2.29367400 | -1.92439200 | 0.04936500  | C | 0.57343300  | 2.93729400  | -0.12873000 |
| O | -3.30975700 | -2.52725600 | -0.30609500 | O | 0.58224300  | 4.09610000  | -0.55193000 |
| O | -1.90754800 | -0.77752000 | -0.43548300 | O | -0.24077400 | 2.00692800  | -0.54290800 |
| H | -0.60678400 | -3.12370100 | 0.51753600  | H | 2.46303400  | 2.10159600  | 0.34798500  |
| H | -1.88079100 | -3.19638900 | 1.76667700  | H | 1.91379200  | 3.30640700  | 1.54465400  |
| H | 0.44545500  | -2.54919800 | 3.29293300  | H | 2.55987900  | 1.04760500  | 3.16643400  |
| H | 1.14894100  | -2.54806100 | 1.65939600  | H | 2.86048600  | 0.35231600  | 1.55776200  |
| H | 1.12793400  | -0.27189000 | 3.71324100  | H | 0.93669000  | -0.65128600 | 3.72343900  |
| H | 2.52295300  | -1.11192600 | 3.05334400  | H | 2.33721100  | -1.48115500 | 3.06220000  |
| C | 2.89164100  | 0.19785100  | 1.01342400  | C | 1.33216900  | -2.52759500 | 1.08295800  |
| C | 2.84551000  | -0.96569300 | 0.02586500  | C | 2.28797900  | -1.93088500 | 0.05081200  |
| O | 3.87874600  | -1.53397500 | -0.33795600 | O | 3.30324100  | -2.53602800 | -0.30314700 |
| O | 1.65239100  | -1.25200900 | -0.41247800 | O | 1.90525900  | -0.78297900 | -0.43439300 |
| H | 3.75304700  | 0.09755900  | 1.69308500  | H | 1.87108200  | -3.20091100 | 1.76869700  |
| H | 3.03436100  | 1.11069700  | 0.41294700  | H | 0.59787500  | -3.12542100 | 0.51893100  |
| H | 2.06015900  | 1.86086500  | 3.14233700  | H | -0.45393700 | -2.54757500 | 3.29359400  |
| H | 1.65782800  | 2.37742300  | 1.48868500  | H | -1.15679500 | -2.54539100 | 1.65982000  |
| H | -0.23742300 | 1.32123300  | 3.65250300  | H | -1.13130100 | -0.26852300 | 3.71288700  |
| H | -0.23395300 | 2.91617100  | 2.91342800  | H | -2.52800000 | -1.10532600 | 3.05254700  |
| C | -1.58394600 | 2.46995200  | 0.90899700  | C | -2.89198800 | 0.20399500  | 1.01143500  |
| C | -0.56748100 | 2.93855500  | -0.12919400 | C | -2.84728200 | -0.96065400 | 0.02503700  |
| O | -0.57372700 | 4.09741700  | -0.55241500 | O | -3.88108700 | -1.52845800 | -0.33797200 |
| O | 0.24541100  | 2.00671300  | -0.54253100 | O | -1.65459000 | -1.24800800 | -0.41374400 |
| H | -1.90793600 | 3.31076300  | 1.54331600  | H | -3.75430900 | 0.10632400  | 1.69030100  |
| H | -2.45925100 | 2.10708200  | 0.34641400  | H | -3.03197300 | 1.11656900  | 0.40988100  |
| O | 0.00319300  | -0.20970200 | -2.33936600 | O | -0.00165800 | -0.20961800 | -2.34017900 |
| H | 0.69251400  | -0.87843300 | -2.50296500 | H | 0.83073300  | -0.68250900 | -2.52030100 |
| H | -0.83064500 | -0.67911100 | -2.52195300 | H | -0.69311200 | -0.87580200 | -2.50492200 |

| Table S25 Atomic coordinates (x,y,z) of [Sc(OH)(L <sup>300</sup> )] <sup>-</sup> isomers. |             |             |             |                                            |             |             |
|-------------------------------------------------------------------------------------------|-------------|-------------|-------------|--------------------------------------------|-------------|-------------|
| [Sc(OH)(L <sup>300</sup> )] <sup>-</sup> Δ                                                |             |             |             | [Sc(OH)(L <sup>300</sup> )] <sup>-</sup> Λ |             |             |
| Sc                                                                                        | 0.00000000  | 0.00000000  | 0.00000000  | Sc                                         | 0.00000000  | 0.00000000  |
| N                                                                                         | -1.24923100 | 1.09524700  | 1.84831000  | N                                          | -1.57680300 | 0.45904700  |
| C                                                                                         | -0.35841700 | 1.72627100  | 2.86524300  | C                                          | -1.61588600 | -0.62800200 |
| C                                                                                         | 1.10076600  | 1.81601900  | 2.42643000  | C                                          | -0.89324500 | -1.90402500 |
| N                                                                                         | 1.55524700  | 0.54145900  | 1.83651200  | N                                          | 0.42271900  | -1.58618700 |
| C                                                                                         | 1.65132200  | -0.54103300 | 2.86091800  | C                                          | 1.37465800  | -1.07987400 |
| C                                                                                         | 0.99875000  | -1.85364700 | 2.42963300  | C                                          | 2.12056700  | 0.18349700  |
| N                                                                                         | -0.33283300 | -1.60667200 | 1.84402400  | N                                          | 1.19370200  | 1.16002500  |
| C                                                                                         | -1.30993000 | -1.15151000 | 2.87643500  | C                                          | 0.27183900  | 1.74134500  |
| C                                                                                         | -2.12135900 | 0.07143500  | 2.45469600  | C                                          | -1.18974100 | 1.75512800  |
| H                                                                                         | -2.65650200 | 0.46786200  | 3.33813300  | H                                          | -1.82305800 | 2.00698200  |
| H                                                                                         | -2.87249900 | -0.20484700 | 1.70699500  | H                                          | -1.35407300 | 2.52441600  |
| H                                                                                         | -0.76244300 | -0.93357100 | 3.80109000  | H                                          | 0.37634400  | 1.16981800  |
| H                                                                                         | -2.00549300 | -1.97069800 | 3.12077700  | H                                          | 0.57802200  | 2.77225700  |
| C                                                                                         | -0.85903100 | -2.76909200 | 1.11579400  | C                                          | 1.89851800  | 2.22319700  |
| C                                                                                         | -1.96617700 | -2.31623400 | 0.16276500  | C                                          | 0.94586000  | 2.89624000  |
| O                                                                                         | -2.87519100 | -3.09443500 | -0.16122100 | O                                          | 1.10463300  | 4.08227600  |
| O                                                                                         | -1.83895600 | -1.10497800 | -0.27644300 | O                                          | 0.02279200  | 2.12015000  |
| H                                                                                         | -0.05343500 | -3.19194400 | 0.49326300  | H                                          | 2.70457400  | 1.76792100  |
| H                                                                                         | -1.22847400 | -3.56278100 | 1.78712800  | H                                          | 2.35047000  | 2.97272400  |
| H                                                                                         | 0.93842900  | -2.52715300 | 3.30519400  | H                                          | 2.63630400  | 0.60752300  |
| H                                                                                         | 1.60578700  | -2.35279900 | 1.66591200  | H                                          | 2.88331300  | -0.05331100 |
| H                                                                                         | 1.18878300  | -0.18392800 | 3.78869800  | H                                          | 0.81658000  | -0.88927200 |
| H                                                                                         | 2.70855900  | -0.73522300 | 3.10336700  | H                                          | 2.11161300  | -1.86173700 |
| C                                                                                         | 2.82816300  | 0.68655300  | 1.11914200  | C                                          | 1.01090300  | -2.71782400 |
| C                                                                                         | 3.00687400  | -0.47410300 | 0.14281500  | C                                          | 2.09207100  | -2.20632500 |
| O                                                                                         | 4.13925400  | -0.85401500 | -0.18698800 | O                                          | 3.04139000  | -2.93504300 |
| O                                                                                         | 1.90014200  | -0.96832700 | -0.31303600 | O                                          | 1.89860400  | -1.00439800 |
| H                                                                                         | 3.69454800  | 0.75670300  | 1.79870800  | H                                          | 1.42240900  | -3.49085600 |
| H                                                                                         | 2.79142000  | 1.60786400  | 0.51524100  | H                                          | 0.22857800  | -3.18296500 |
| H                                                                                         | 1.72019700  | 2.10237600  | 3.29727400  | H                                          | -0.79588400 | -2.57266600 |
| H                                                                                         | 1.22402300  | 2.59177600  | 1.66185000  | H                                          | -1.47305100 | -2.43593900 |
| H                                                                                         | -0.43233500 | 1.15233700  | 3.79657400  | H                                          | -1.17436000 | -0.24600200 |
| H                                                                                         | -0.71843100 | 2.74021200  | 3.10381800  | H                                          | -2.66142300 | -0.87840300 |
| C                                                                                         | -2.01219300 | 2.11843200  | 1.12183400  | C                                          | -2.85576200 | 0.53990700  |
| C                                                                                         | -1.09935500 | 2.84181100  | 0.13382300  | C                                          | -2.97525400 | -0.62969800 |
| O                                                                                         | -1.32143900 | 4.01751600  | -0.18688900 | O                                          | -4.08634100 | -1.06838700 |
| O                                                                                         | -0.13709500 | 2.11554600  | -0.34253200 | O                                          | -1.84494300 | -1.06664600 |
| H                                                                                         | -2.50202400 | 2.84315100  | 1.79429300  | H                                          | -3.72449500 | 0.56758400  |
| H                                                                                         | -2.79380600 | 1.62023600  | 0.52554400  | H                                          | -2.86466900 | 1.46138500  |
| O                                                                                         | 0.05191600  | -0.10581700 | -2.03936000 | O                                          | -0.04803000 | -0.10622400 |
| H                                                                                         | -0.79290000 | 0.21544700  | -2.39531800 | H                                          | 0.78195300  | 0.25199900  |

Table S26 Atomic coordinates (x,y,z) of [Sc(L<sup>210</sup>)]<sup>+</sup> isomers



| [Sc(L <sup>210</sup> )] <sup>+</sup> Δ |             |             |             | [Sc(L <sup>210</sup> )] <sup>+</sup> Λ |             |             |             |
|----------------------------------------|-------------|-------------|-------------|----------------------------------------|-------------|-------------|-------------|
| Sc                                     | 0.00000000  | 0.00000000  | 0.00000000  | Sc                                     | 0.00000000  | 0.00000000  | 0.00000000  |
| N                                      | 0.38392300  | 1.54651300  | 1.76499500  | N                                      | -0.38437100 | 1.54663400  | 1.76488100  |
| C                                      | 1.61767100  | 1.21948700  | 2.54172400  | C                                      | -1.61806800 | 1.21943600  | 2.54158200  |
| C                                      | 2.50328400  | 0.20623700  | 1.82758200  | C                                      | -2.50350600 | 0.20607300  | 1.82737300  |
| N                                      | 1.70854000  | -0.94960900 | 1.33216000  | N                                      | -1.70850200 | -0.94958700 | 1.33191100  |
| C                                      | 1.16586900  | -1.77887300 | 2.45154200  | C                                      | -1.16586000 | -1.77883700 | 2.45133700  |
| C                                      | -0.31055700 | -2.10907100 | 2.27623700  | C                                      | 0.31063700  | -2.10887700 | 2.27623100  |
| N                                      | -1.09728600 | -0.89589000 | 1.92822800  | N                                      | 1.09724700  | -0.89560900 | 1.92823600  |
| C                                      | -1.14872900 | 0.08331600  | 3.05831800  | C                                      | 1.14842200  | 0.08367200  | 3.05829400  |
| C                                      | -0.83746900 | 1.50427700  | 2.60936400  | C                                      | 0.83699500  | 1.50458900  | 2.60928900  |
| H                                      | -0.73212600 | 2.15413800  | 3.49590400  | H                                      | 0.73153700  | 2.15443400  | 3.49583400  |
| H                                      | -1.66237000 | 1.89723800  | 2.00111500  | H                                      | 1.66188200  | 1.89763100  | 2.00107600  |
| H                                      | -0.44284500 | -0.23956100 | 3.83177200  | H                                      | 0.44247900  | -0.23929600 | 3.83165700  |
| H                                      | -2.14612900 | 0.06885100  | 3.52243500  | H                                      | 2.14577100  | 0.06939000  | 3.52252900  |
| C                                      | -2.45413800 | -1.26834800 | 1.47740800  | C                                      | 2.45419200  | -1.26793500 | 1.47756300  |
| C                                      | -2.95810600 | -0.24521900 | 0.47891100  | C                                      | 2.95814700  | -0.24482000 | 0.47905900  |
| O                                      | -2.08458100 | 0.40285100  | -0.18909700 | N                                      | 4.25127600  | -0.05289200 | 0.27904900  |
| N                                      | -4.25125200 | -0.05341100 | 0.27890500  | C                                      | 4.70928200  | 0.94966000  | -0.68597200 |
| C                                      | -4.70958900 | 0.94934300  | -0.68572000 | H                                      | 3.95991600  | 1.74056300  | -0.79131700 |
| H                                      | -5.64743500 | 1.38063600  | -0.31215000 | H                                      | 5.64871100  | 1.37899000  | -0.31418500 |
| H                                      | -3.95901400 | 1.73878400  | -0.79324000 | H                                      | 4.89293700  | 0.48242400  | -1.66623400 |
| H                                      | -4.89628600 | 0.48172900  | -1.66522100 | C                                      | 5.30574400  | -0.84876700 | 0.91168400  |
| C                                      | -5.30561300 | -0.84918500 | 0.91189100  | H                                      | 4.91010300  | -1.77581200 | 1.33586100  |
| H                                      | -6.04445200 | -1.11082000 | 0.14183300  | H                                      | 6.04343800  | -1.11204000 | 0.14106900  |
| H                                      | -4.91026000 | -1.77714600 | 1.33434100  | H                                      | 5.80746100  | -0.26355200 | 1.69702000  |
| H                                      | -5.80588700 | -0.26456500 | 1.69859400  | O                                      | 2.08461700  | 0.40316700  | -0.18903000 |
| H                                      | -2.40290300 | -2.22725000 | 0.93802400  | H                                      | 2.40308200  | -2.22684800 | 0.93819300  |
| H                                      | -3.13326200 | -1.39637800 | 2.33059500  | H                                      | 3.13325200  | -1.39584700 | 2.33082100  |
| H                                      | -0.69355400 | -2.58235700 | 3.19711000  | H                                      | 0.69355900  | -2.58203900 | 3.19720000  |
| H                                      | -0.43937800 | -2.82219700 | 1.45130500  | H                                      | 0.43965200  | -2.82205700 | 1.45137800  |
| H                                      | 1.33181300  | -1.24689600 | 3.39506700  | H                                      | -1.33194500 | -1.24687200 | 3.39484600  |
| H                                      | 1.72848200  | -2.72140700 | 2.52512300  | H                                      | -1.72839800 | -2.72142300 | 2.52484200  |
| C                                      | 2.48695400  | -1.77153700 | 0.38061100  | C                                      | -2.48675400 | -1.77156400 | 0.38025200  |
| C                                      | 1.58367200  | -2.43652800 | -0.65324700 | C                                      | -1.58327900 | -2.43671800 | -0.65331300 |
| O                                      | 1.90589700  | -3.48956800 | -1.20085900 | O                                      | -1.90535300 | -3.48985300 | -1.20082400 |
| O                                      | 0.49475900  | -1.76241200 | -0.93499800 | O                                      | -0.49433300 | -1.76259100 | -0.93499700 |
| H                                      | 3.10816800  | -2.52209900 | 0.89241400  | H                                      | -3.10815800 | -2.52199700 | 0.89201400  |
| H                                      | 3.15584400  | -1.10706200 | -0.18900400 | H                                      | -3.15542300 | -1.10707200 | -0.18960000 |
| H                                      | 3.30693300  | -0.12645700 | 2.50759800  | H                                      | -3.30710200 | -0.12684200 | 2.50734100  |
| H                                      | 2.97332500  | 0.66974800  | 0.95045500  | H                                      | -2.97361400 | 0.66956100  | 0.95027400  |
| H                                      | 1.32173700  | 0.84584900  | 3.52869700  | H                                      | -1.32210800 | 0.84578000  | 3.52853900  |
| H                                      | 2.20126900  | 2.13516900  | 2.71938300  | H                                      | -2.20180800 | 2.13502500  | 2.71926900  |
| C                                      | 0.50989600  | 2.84534600  | 1.07232700  | C                                      | -0.51054100 | 2.84536500  | 1.07206700  |
| C                                      | 1.23919900  | 2.70021800  | -0.25886700 | C                                      | -1.23964400 | 2.70000000  | -0.25921100 |
| O                                      | 1.86450800  | 3.63799400  | -0.75116500 | O                                      | -1.86503400 | 3.63760600  | -0.75171700 |

|   |             |            |             |   |             |            |             |
|---|-------------|------------|-------------|---|-------------|------------|-------------|
| O | 1.08635100  | 1.53288200 | -0.83660800 | O | -1.08657700 | 1.53259100 | -0.83680900 |
| H | 0.99871100  | 3.60532100 | 1.70090200  | H | -0.99960200 | 3.60530000 | 1.70050300  |
| H | -0.49978700 | 3.20857600 | 0.82247400  | H | 0.49909600  | 3.20877100 | 0.82229800  |

**Table S27** Atomic coordinates (x,y,z) of [ScF(L<sup>210</sup>)] isomers.

| [ScF(L <sup>210</sup> )] Δ |             |             |             | [ScF(L <sup>210</sup> )] Λ |             |             |             |
|----------------------------|-------------|-------------|-------------|----------------------------|-------------|-------------|-------------|
| Sc                         | 0.00000000  | 0.00000000  | 0.00000000  | Sc                         | 0.00000000  | 0.00000000  | 0.00000000  |
| N                          | 0.33496400  | 1.50031400  | 1.89504200  | N                          | -0.33505800 | 1.50026200  | 1.89500700  |
| C                          | 1.56620300  | 1.18863300  | 2.68342800  | C                          | -1.56631400 | 1.18859900  | 2.68337400  |
| C                          | 2.49295800  | 0.18487200  | 2.00133300  | C                          | -2.49305900 | 0.18482600  | 2.00128000  |
| N                          | 1.72111800  | -0.95354900 | 1.46420300  | N                          | -1.72118500 | -0.95356300 | 1.46411400  |
| C                          | 1.16790300  | -1.80792900 | 2.55547200  | C                          | -1.16799400 | -1.80797100 | 2.55536700  |
| C                          | -0.30059400 | -2.16807000 | 2.35717300  | C                          | 0.30050000  | -2.16812700 | 2.35707700  |
| N                          | -1.08659300 | -0.97225400 | 1.98107000  | N                          | 1.08653300  | -0.97229900 | 1.98107200  |
| C                          | -1.19132400 | -0.00945300 | 3.12271300  | C                          | 1.19118800  | -0.00950800 | 3.12272700  |
| C                          | -0.87596500 | 1.43415700  | 2.73858400  | C                          | 0.87583100  | 1.43411500  | 2.73861600  |
| H                          | -0.75628700 | 2.03086200  | 3.66158300  | H                          | 0.75607800  | 2.03078600  | 3.66162400  |
| H                          | -1.70187700 | 1.86972200  | 2.16601300  | H                          | 1.70176600  | 1.86971100  | 2.16610700  |
| H                          | -0.51134200 | -0.34099700 | 3.91579500  | H                          | 0.51117200  | -0.34107000 | 3.91577200  |
| H                          | -2.20430700 | -0.04868200 | 3.55296200  | H                          | 2.20414700  | -0.04872800 | 3.55303600  |
| C                          | -2.42379900 | -1.35046000 | 1.49952300  | C                          | 2.42376700  | -1.35048300 | 1.49958300  |
| C                          | -2.97952300 | -0.18840600 | 0.69788100  | C                          | 2.97949800  | -0.18841600 | 0.69796300  |
| O                          | -2.14544100 | 0.60731600  | 0.17578900  | N                          | 4.28916700  | -0.02247200 | 0.53809800  |
| N                          | -4.28920300 | -0.02246000 | 0.53810900  | C                          | 4.78784700  | 1.11252000  | -0.23964000 |
| C                          | -4.78808400 | 1.11254800  | -0.23945300 | H                          | 4.11441200  | 1.96933500  | -0.12930000 |
| H                          | -5.78327500 | 1.37988800  | 0.13894500  | H                          | 5.78367700  | 1.37902300  | 0.13763900  |
| H                          | -4.11393300 | 1.96894300  | -0.13030200 | H                          | 4.86911600  | 0.84917200  | -1.30663400 |
| H                          | -4.87088300 | 0.84879400  | -1.30623000 | C                          | 5.29786900  | -0.99134400 | 0.96449000  |
| C                          | -5.29787200 | -0.99123800 | 0.96479400  | H                          | 4.83917200  | -1.91919400 | 1.31753000  |
| H                          | -5.94055600 | -1.23111500 | 0.10473400  | H                          | 5.93993600  | -1.23175600 | 0.10411500  |
| H                          | -4.83919900 | -1.91937400 | 1.31711900  | H                          | 5.92491800  | -0.56508500 | 1.76239200  |
| H                          | -5.92430900 | -0.56515700 | 1.76327800  | O                          | 2.14542400  | 0.60737600  | 0.17596400  |
| H                          | -2.33314500 | -2.20837700 | 0.81428100  | H                          | 2.33317100  | -2.20842200 | 0.81436400  |
| H                          | -3.08368600 | -1.64282400 | 2.32976500  | H                          | 3.08363500  | -1.64281300 | 2.32985500  |
| H                          | -0.68779800 | -2.62600600 | 3.28573500  | H                          | 0.68767400  | -2.62613400 | 3.28561500  |
| H                          | -0.41228900 | -2.90201200 | 1.55151800  | H                          | 0.41219600  | -2.90200600 | 1.55136200  |
| H                          | 1.29916800  | -1.28471100 | 3.50943300  | H                          | -1.29925600 | -1.28477300 | 3.50933900  |
| H                          | 1.75127900  | -2.73905600 | 2.63626300  | H                          | -1.75137900 | -2.73909500 | 2.63613500  |
| C                          | 2.49639700  | -1.76727300 | 0.51797400  | C                          | -2.49646500 | -1.76725600 | 0.51784700  |
| C                          | 1.54478600  | -2.57961200 | -0.35995100 | C                          | -1.54488600 | -2.57951100 | -0.36019900 |
| O                          | 1.89439700  | -3.66500700 | -0.83923700 | O                          | -1.89459300 | -3.66480800 | -0.83963300 |
| O                          | 0.39560000  | -2.01281300 | -0.57431600 | O                          | -0.39566000 | -2.01277500 | -0.57448700 |
| H                          | 3.22071600  | -2.43032300 | 1.01982700  | H                          | -3.22072200 | -2.43038400 | 1.01968400  |
| H                          | 3.05351500  | -1.09428400 | -0.15387600 | H                          | -3.05364800 | -1.09424000 | -0.15391700 |
| H                          | 3.25561900  | -0.15079600 | 2.72828300  | H                          | -3.25569200 | -0.15089200 | 2.72823300  |
| H                          | 3.01615700  | 0.65242100  | 1.15974000  | H                          | -3.01628000 | 0.65237700  | 1.15970600  |
| H                          | 1.25984600  | 0.80628500  | 3.66415500  | H                          | -1.25997100 | 0.80625500  | 3.66410700  |
| H                          | 2.12828700  | 2.11549900  | 2.87924500  | H                          | -2.12839200 | 2.11547100  | 2.87917800  |
| C                          | 0.47154300  | 2.79788800  | 1.21602600  | C                          | -0.47161500 | 2.79781900  | 1.21594400  |

|   |             |            |             |   |             |            |             |
|---|-------------|------------|-------------|---|-------------|------------|-------------|
| C | 1.42367700  | 2.65837300 | 0.02947700  | C | -1.42372000 | 2.65828800 | 0.02935300  |
| O | 2.07731600  | 3.62673900 | -0.37641800 | O | -2.07714100 | 3.62674000 | -0.37668500 |
| O | 1.43991100  | 1.47696600 | -0.50971300 | O | -1.44014600 | 1.47682700 | -0.50969900 |
| H | 0.81142400  | 3.59836400 | 1.89400100  | H | -0.81154500 | 3.59830800 | 1.89387800  |
| H | -0.50930600 | 3.08707000 | 0.80441400  | H | 0.50925400  | 3.08700000 | 0.80438200  |
| F | -0.51098700 | 0.18196000 | -1.87999900 | F | 0.51110600  | 0.18214800 | -1.87989900 |

**Table S28** Atomic coordinates (x,y,z) of [Sc(OH<sub>2</sub>)(L<sup>210</sup>)]<sup>+</sup> isomers.

| [Sc(OH <sub>2</sub> )(L <sup>210</sup> )] <sup>+</sup> Δ |             |             |             | [Sc(OH <sub>2</sub> )(L <sup>210</sup> )] <sup>+</sup> Λ |             |             |             |
|----------------------------------------------------------|-------------|-------------|-------------|----------------------------------------------------------|-------------|-------------|-------------|
| Sc                                                       | 0.00000000  | 0.00000000  | 0.00000000  | Sc                                                       | 0.00000000  | 0.00000000  | 0.00000000  |
| N                                                        | 0.30858900  | 1.37482700  | 1.91158800  | N                                                        | -0.30858600 | 1.37483300  | 1.91158400  |
| C                                                        | 1.53885800  | 1.03070500  | 2.69205600  | C                                                        | -1.53885300 | 1.03071200  | 2.69205400  |
| C                                                        | 2.47258600  | 0.08193400  | 1.94769900  | C                                                        | -2.47258200 | 0.08194100  | 1.94769900  |
| N                                                        | 1.70977700  | -1.02755600 | 1.32930400  | N                                                        | -1.70977300 | -1.02755000 | 1.32930600  |
| C                                                        | 1.16190800  | -1.96388200 | 2.35848800  | C                                                        | -1.16190500 | -1.96387500 | 2.35849200  |
| C                                                        | -0.29926800 | -2.32201500 | 2.12032000  | C                                                        | 0.29927100  | -2.32200900 | 2.12032600  |
| N                                                        | -1.10310500 | -1.10612800 | 1.84628500  | N                                                        | 1.10310700  | -1.10612400 | 1.84628500  |
| C                                                        | -1.20734800 | -0.21915300 | 3.04919700  | C                                                        | 1.20735300  | -0.21914500 | 3.04919400  |
| C                                                        | -0.91480100 | 1.24554900  | 2.73731700  | C                                                        | 0.91480600  | 1.24555600  | 2.73731000  |
| H                                                        | -0.81752600 | 1.80520100  | 3.68439000  | H                                                        | 0.81753400  | 1.80521100  | 3.68438200  |
| H                                                        | -1.74157300 | 1.68967500  | 2.17047800  | H                                                        | 1.74157700  | 1.68967900  | 2.17046800  |
| H                                                        | -0.51887900 | -0.59040200 | 3.81647800  | H                                                        | 0.51888500  | -0.59039100 | 3.81647600  |
| H                                                        | -2.21705200 | -0.29374000 | 3.48008300  | H                                                        | 2.21705700  | -0.29373200 | 3.48007800  |
| C                                                        | -2.44478900 | -1.46196200 | 1.35063600  | C                                                        | 2.44479100  | -1.46195800 | 1.35063300  |
| C                                                        | -2.98490500 | -0.28790100 | 0.55943200  | C                                                        | 2.98490500  | -0.28789900 | 0.55942500  |
| O                                                        | -2.13196100 | 0.48195400  | 0.01437200  | N                                                        | 4.28529300  | -0.08181700 | 0.41760300  |
| N                                                        | -4.28529500 | -0.08182500 | 0.41760700  | C                                                        | 4.76678000  | 1.06924100  | -0.34939100 |
| C                                                        | -4.76678500 | 1.06923400  | -0.34938400 | H                                                        | 4.03385500  | 1.88150100  | -0.30713400 |
| H                                                        | -5.71415900 | 1.40543100  | 0.09157900  | H                                                        | 5.71415800  | 1.40543600  | 0.09156400  |
| H                                                        | -4.03385900 | 1.88149200  | -0.30713400 | H                                                        | 4.94173100  | 0.78647400  | -1.39951300 |
| H                                                        | -4.94174600 | 0.78646500  | -1.39950400 | C                                                        | 5.31821000  | -0.99552000 | 0.90823600  |
| C                                                        | -5.31820800 | -0.99553400 | 0.90823400  | H                                                        | 4.89527100  | -1.96252800 | 1.19424700  |
| H                                                        | -6.04379400 | -1.16353000 | 0.09986500  | H                                                        | 6.04379800  | -1.16351700 | 0.09986800  |
| H                                                        | -4.89526600 | -1.96254200 | 1.19424100  | H                                                        | 5.84344700  | -0.55166700 | 1.76746200  |
| H                                                        | -5.84344800 | -0.55168700 | 1.76746200  | O                                                        | 2.13195900  | 0.48194900  | 0.01435700  |
| H                                                        | -2.35902900 | -2.30734800 | 0.64942700  | H                                                        | 2.35903000  | -2.30734600 | 0.64942700  |
| H                                                        | -3.10728600 | -1.76343200 | 2.17356800  | H                                                        | 3.10728900  | -1.76342600 | 2.17356500  |
| H                                                        | -0.68707600 | -2.86719700 | 2.99915300  | H                                                        | 0.68707900  | -2.86718600 | 2.99916200  |
| H                                                        | -0.39659300 | -2.97962500 | 1.24773600  | H                                                        | 0.39659600  | -2.97962400 | 1.24774600  |
| H                                                        | 1.28380900  | -1.50769900 | 3.34735200  | H                                                        | -1.28380700 | -1.50768900 | 3.34735500  |
| H                                                        | 1.75472200  | -2.89112800 | 2.37384800  | H                                                        | -1.75472000 | -2.89112000 | 2.37385400  |
| C                                                        | 2.51095700  | -1.75750700 | 0.33091500  | C                                                        | -2.51095100 | -1.75750300 | 0.33091700  |
| C                                                        | 1.60215100  | -2.43044300 | -0.69284900 | C                                                        | -1.60214200 | -2.43045000 | -0.69283600 |
| O                                                        | 1.95786900  | -3.44050200 | -1.30164600 | O                                                        | -1.95786300 | -3.44051000 | -1.30163000 |
| O                                                        | 0.46682000  | -1.81390300 | -0.88955400 | O                                                        | -0.46680500 | -1.81391900 | -0.88953500 |
| H                                                        | 3.19060300  | -2.49174000 | 0.79104900  | H                                                        | -3.19060400 | -2.49172800 | 0.79105300  |
| H                                                        | 3.11993000  | -1.03016300 | -0.22939200 | H                                                        | -3.11991700 | -1.03015900 | -0.22939800 |
| H                                                        | 3.23671300  | -0.30018800 | 2.64773600  | H                                                        | -3.23671000 | -0.30017900 | 2.64773500  |
| H                                                        | 2.99164800  | 0.60905900  | 1.13905600  | H                                                        | -2.99164400 | 0.60906500  | 1.13905500  |
| H                                                        | 1.23169800  | 0.58939700  | 3.64695400  | H                                                        | -1.23169200 | 0.58940500  | 3.64695200  |
| H                                                        | 2.08973700  | 1.95014900  | 2.94154700  | H                                                        | -2.08973200 | 1.95015700  | 2.94154600  |
| C                                                        | 0.43444800  | 2.71565300  | 1.30977100  | C                                                        | -0.43444500 | 2.71565900  | 1.30976600  |

|   |             |            |             |   |             |            |             |
|---|-------------|------------|-------------|---|-------------|------------|-------------|
| C | 1.36182900  | 2.65860000 | 0.09775200  | C | -1.36182600 | 2.65860500 | 0.09774700  |
| O | 2.00427200  | 3.64582200 | -0.26530500 | O | -2.00427100 | 3.64582600 | -0.26531000 |
| O | 1.36051800  | 1.50899800 | -0.51968900 | O | -1.36051200 | 1.50900300 | -0.51969600 |
| H | 0.78278400  | 3.46890600 | 2.03391700  | H | -0.78278100 | 3.46891200 | 2.03391100  |
| H | -0.55308900 | 3.02896400 | 0.93333200  | H | 0.55309200  | 3.02897000 | 0.93332600  |
| O | -0.61777100 | 0.57795400 | -2.17477200 | O | 0.61773500  | 0.57792700 | -2.17478200 |
| H | -0.02050400 | 1.30932200 | -2.41320800 | H | 0.02045100  | 1.30928900 | -2.41319400 |
| H | -1.49237000 | 0.99739200 | -2.08688600 | H | 1.49233200  | 0.99737400 | -2.08692900 |

**Table S29** Atomic coordinates (x,y,z) of Sc(OH)(L<sup>210</sup>) isomers.

| Sc(OH)(L <sup>210</sup> ) Δ |             |             |             | Sc(OH)(L <sup>210</sup> ) Λ |             |             |             |
|-----------------------------|-------------|-------------|-------------|-----------------------------|-------------|-------------|-------------|
| Sc                          | 0.00000000  | 0.00000000  | 0.00000000  | Sc                          | 0.00000000  | 0.00000000  | 0.00000000  |
| N                           | 0.32735000  | 1.48427100  | 1.90852000  | N                           | -0.33234400 | 1.48215000  | 1.90903800  |
| C                           | 1.54741200  | 1.16743100  | 2.71118300  | C                           | -1.55224200 | 1.16244300  | 2.71076700  |
| C                           | 2.48165400  | 0.16408100  | 2.03841400  | C                           | -2.48409400 | 0.15787300  | 2.03659700  |
| N                           | 1.71529900  | -0.96735700 | 1.48065700  | N                           | -1.71500300 | -0.97181000 | 1.47905900  |
| C                           | 1.14973100  | -1.83086600 | 2.55741200  | C                           | -1.14931300 | -1.83497800 | 2.55588400  |
| C                           | -0.31708100 | -2.18762900 | 2.34230300  | C                           | 0.31822100  | -2.18924100 | 2.34179500  |
| N                           | -1.10200500 | -0.98982200 | 1.97115500  | N                           | 1.10164200  | -0.99014200 | 1.97165900  |
| C                           | -1.21230700 | -0.02973200 | 3.11428700  | C                           | 1.20928700  | -0.02995700 | 3.11499800  |
| C                           | -0.89366400 | 1.41586600  | 2.73649000  | C                           | 0.88826900  | 1.41534600  | 2.73773800  |
| H                           | -0.78657100 | 2.01031800  | 3.66266300  | H                           | 0.77945700  | 2.00891500  | 3.66428400  |
| H                           | -1.71313900 | 1.85183200  | 2.15483800  | H                           | 1.70736300  | 1.85313000  | 2.15694600  |
| H                           | -0.53740900 | -0.36383500 | 3.91069600  | H                           | 0.53450500  | -0.36558000 | 3.91088400  |
| H                           | -2.22794000 | -0.06888600 | 3.53845600  | H                           | 2.22470500  | -0.06721500 | 3.53987400  |
| C                           | -2.43643100 | -1.36701300 | 1.48323500  | C                           | 2.43695200  | -1.36555600 | 1.48502800  |
| C                           | -2.98885700 | -0.20261500 | 0.68348000  | C                           | 2.98901400  | -0.20025200 | 0.68643900  |
| O                           | -2.15385900 | 0.59272100  | 0.16344100  | N                           | 4.29856400  | -0.02955500 | 0.53007200  |
| N                           | -4.29862500 | -0.03338500 | 0.52723000  | C                           | 4.79496200  | 1.11519300  | -0.23492900 |
| C                           | -4.79871200 | 1.11040900  | -0.23653800 | H                           | 4.12842300  | 1.97438500  | -0.10173900 |
| H                           | -5.79085000 | 1.37685300  | 0.15049900  | H                           | 5.79650600  | 1.36934500  | 0.13537300  |
| H                           | -4.12169300 | 1.96393000  | -0.12229900 | H                           | 4.86181300  | 0.87038700  | -1.30720300 |
| H                           | -4.88835900 | 0.85789900  | -1.30535500 | C                           | 5.30907000  | -0.99580000 | 0.95854800  |
| C                           | -5.30763500 | -0.99906500 | 0.96082600  | H                           | 4.85282000  | -1.93337800 | 1.28854300  |
| H                           | -5.97679700 | -1.21051900 | 0.11390600  | H                           | 5.96724600  | -1.21704100 | 0.10541100  |
| H                           | -4.85118100 | -1.94133200 | 1.27704700  | H                           | 5.91912800  | -0.57741100 | 1.77370500  |
| H                           | -5.90628300 | -0.58523300 | 1.78675600  | O                           | 2.15395900  | 0.59545200  | 0.16708500  |
| H                           | -2.34287800 | -2.22294200 | 0.79587900  | H                           | 2.34524400  | -2.22155500 | 0.79755400  |
| H                           | -3.10001700 | -1.66214300 | 2.30963500  | H                           | 3.10009400  | -1.65995300 | 2.31210100  |
| H                           | -0.71186100 | -2.65648600 | 3.26242800  | H                           | 0.71309800  | -2.65789600 | 3.26198700  |
| H                           | -0.42104200 | -2.91279300 | 1.52743800  | H                           | 0.42394800  | -2.91396800 | 1.52675400  |
| H                           | 1.27177700  | -1.31677100 | 3.51771500  | H                           | -1.27304500 | -1.32161800 | 3.51635800  |
| H                           | 1.73055400  | -2.76400100 | 2.63573200  | H                           | -1.72876600 | -2.76906500 | 2.63315100  |
| C                           | 2.50304700  | -1.76953900 | 0.53571600  | C                           | -2.49985900 | -1.77472200 | 0.53239700  |
| C                           | 1.56811500  | -2.57940700 | -0.36159000 | C                           | -1.56188400 | -2.58235500 | -0.36385800 |
| O                           | 1.93156900  | -3.66109000 | -0.84098000 | O                           | -1.92172700 | -3.66531300 | -0.84302300 |
| O                           | 0.42132100  | -2.01705000 | -0.59322100 | O                           | -0.41640800 | -2.01684800 | -0.59479800 |
| H                           | 3.22538700  | -2.43383300 | 1.03930200  | H                           | -3.22173700 | -2.44075500 | 1.03433800  |
| H                           | 3.06439300  | -1.08775900 | -0.12361000 | H                           | -3.06134200 | -1.09351500 | -0.12739600 |
| H                           | 3.23024200  | -0.17950500 | 2.77643800  | H                           | -3.23284000 | -0.18748700 | 2.77363000  |
| H                           | 3.02126400  | 0.63528100  | 1.20977200  | H                           | -3.02368900 | 0.62854400  | 1.20765400  |
| H                           | 1.22768500  | 0.78169400  | 3.68627000  | H                           | -1.23229100 | 0.77654400  | 3.68570800  |
| H                           | 2.10842400  | 2.09268400  | 2.91816200  | H                           | -2.11506800 | 2.08648700  | 2.91819600  |
| C                           | 0.47752000  | 2.78000900  | 1.22971800  | C                           | -0.48488600 | 2.77789200  | 1.23081300  |
| C                           | 1.45521400  | 2.63831600  | 0.06303700  | C                           | -1.46158100 | 2.63463400  | 0.06338500  |

|   |             |            |             |   |             |            |             |
|---|-------------|------------|-------------|---|-------------|------------|-------------|
| O | 2.10995200  | 3.61105400 | -0.33365500 | O | -2.11851200 | 3.60601900 | -0.33288200 |
| O | 1.49246500  | 1.45546800 | -0.46830700 | O | -1.49567000 | 1.45202700 | -0.46890800 |
| H | 0.80372300  | 3.58252400 | 1.91231200  | H | -0.81332500 | 3.57932700 | 1.91359600  |
| H | -0.49501800 | 3.06837300 | 0.79779800  | H | 0.48730500  | 3.06862200 | 0.79967200  |
| O | -0.55502600 | 0.25916900 | -1.93756900 | O | 0.55721200  | 0.26403100 | -1.93584500 |
| H | 0.21765300  | 0.14868500 | -2.51592200 | H | -0.21575300 | 0.16164000 | -2.51528200 |



**Table S30** Atomic coordinates (x,y,z) of [Sc(L<sup>120</sup>)]<sup>2+</sup> isomers.

| [Sc(L <sup>120</sup> )] <sup>2+</sup> Δ |             |             | [Sc(L <sup>120</sup> )] <sup>2+</sup> Λ |    |             |             |             |
|-----------------------------------------|-------------|-------------|-----------------------------------------|----|-------------|-------------|-------------|
| Sc                                      | 0.00000000  | 0.00000000  | 0.00000000                              | Sc | 0.00000000  | 0.00000000  | 0.00000000  |
| N                                       | 0.00000000  | 0.00000000  | 2.37101800                              | N  | 0.63149400  | 2.02495700  | 1.09954700  |
| C                                       | 1.38603000  | 0.00000000  | 2.93240900                              | C  | -0.44604300 | 2.54397900  | 1.99141900  |
| C                                       | 2.43524100  | 0.35587700  | 1.88969200                              | C  | -1.79077200 | 1.89473100  | 1.70449800  |
| N                                       | 2.24096900  | -0.42195900 | 0.63415000                              | N  | -1.67575600 | 0.41010700  | 1.64890900  |
| C                                       | 2.50955200  | -1.88183400 | 0.83848600                              | C  | -1.30214200 | -0.17096400 | 2.97673000  |
| C                                       | 1.41708300  | -2.76919900 | 0.26054900                              | C  | -0.16708400 | -1.17948500 | 2.87756600  |
| N                                       | 0.06363500  | -2.30640900 | 0.66970700                              | N  | 0.97601700  | -0.64849500 | 2.08491000  |
| C                                       | -0.17296200 | -2.46686400 | 2.13851700                              | C  | 1.65914900  | 0.49376100  | 2.77032700  |
| C                                       | -0.76233100 | -1.21235600 | 2.76862400                              | C  | 1.87014300  | 1.68625100  | 1.84654200  |
| H                                       | -0.78427200 | -1.32666900 | 3.86645700                              | H  | 2.23066400  | 2.54816600  | 2.43483300  |
| H                                       | -1.79524600 | -1.06991700 | 2.42252400                              | H  | 2.63578700  | 1.44242800  | 1.09771000  |
| H                                       | 0.77507300  | -2.73707700 | 2.61757200                              | H  | 1.06900400  | 0.77731400  | 3.64955900  |
| H                                       | -0.85928800 | -3.30668300 | 2.32018000                              | H  | 2.63882300  | 0.16907000  | 3.14986800  |
| C                                       | -0.97745600 | -3.00245700 | -0.11896500                             | C  | 1.92845000  | -1.73666400 | 1.77036900  |
| C                                       | -2.14824000 | -2.07192200 | -0.35520900                             | C  | 2.56139000  | -1.49834700 | 0.41511900  |
| O                                       | -1.89755000 | -0.81920400 | -0.38549800                             | N  | 3.71923300  | -2.04100900 | 0.08088400  |
| N                                       | -3.37258200 | -2.52369600 | -0.56140700                             | C  | 4.28353800  | -1.80316500 | -1.25092100 |
| C                                       | -4.47605500 | -1.58489900 | -0.78283900                             | H  | 3.98322500  | -0.81565000 | -1.61614300 |
| H                                       | -5.39198200 | -2.03157800 | -0.37510200                             | H  | 5.37701000  | -1.85058600 | -1.17272700 |
| H                                       | -4.27087300 | -0.63737400 | -0.27454300                             | H  | 3.94037900  | -2.57643500 | -1.95610100 |
| H                                       | -4.61480500 | -1.40375200 | -1.86018000                             | C  | 4.45739200  | -2.98711000 | 0.91996800  |
| C                                       | -3.71777500 | -3.94216200 | -0.68035200                             | H  | 3.85743900  | -3.32549400 | 1.76888300  |
| H                                       | -4.35152900 | -4.06738900 | -1.56956700                             | H  | 4.71396500  | -3.86316800 | 0.30734300  |
| H                                       | -2.82709000 | -4.56381700 | -0.80335800                             | H  | 5.38715600  | -2.52449800 | 1.28286600  |
| H                                       | -4.28170800 | -4.27026100 | 0.20555800                              | O  | 1.90922100  | -0.78464000 | -0.41937800 |
| H                                       | -0.57325700 | -3.24359600 | -1.11458100                             | H  | 1.37536100  | -2.68526700 | 1.68632600  |
| H                                       | -1.27081500 | -3.94414600 | 0.36190400                              | H  | 2.67246800  | -1.85219500 | 2.56926800  |
| H                                       | 1.59226700  | -3.81396200 | 0.57052100                              | H  | 0.15486300  | -1.47044800 | 3.89254200  |
| H                                       | 1.44809900  | -2.72956500 | -0.83647700                             | H  | -0.52101300 | -2.08186300 | 2.36100000  |
| H                                       | 2.63322300  | -2.06533800 | 1.91165500                              | H  | -1.03792800 | 0.64838100  | 3.65442400  |
| H                                       | 3.46460900  | -2.15500000 | 0.36713000                              | H  | -2.17282600 | -0.67188500 | 3.42380800  |
| C                                       | 3.08690000  | 0.13638500  | -0.44304500                             | C  | -2.93094900 | -0.17934100 | 1.13390600  |
| C                                       | 2.40297500  | -0.03399900 | -1.78326700                             | C  | -2.63337800 | -1.39348100 | 0.27755400  |
| O                                       | 1.13379700  | -0.17604900 | -1.78171700                             | O  | -1.45761500 | -1.50458500 | -0.20913500 |
| N                                       | 3.07667300  | 0.01344400  | -2.91974100                             | N  | -3.57152900 | -2.28454700 | 0.00825200  |
| C                                       | 2.35992300  | -0.08361500 | -4.19487200                             | C  | -4.96588400 | -2.15113100 | 0.43659200  |
| H                                       | 1.50978400  | -0.76736400 | -4.09921800                             | H  | -5.19126700 | -1.13034100 | 0.75731400  |
| H                                       | 1.99848100  | 0.90874700  | -4.50769900                             | H  | -5.61182700 | -2.39303600 | -0.41869800 |
| H                                       | 3.05664600  | -0.46565400 | -4.95099800                             | H  | -5.18247800 | -2.85461800 | 1.25448900  |
| C                                       | 4.49967900  | 0.33999300  | -3.01942800                             | C  | -3.27633300 | -3.44558200 | -0.83504800 |
| H                                       | 5.03593300  | -0.48772600 | -3.50549700                             | H  | -3.55910700 | -3.23935200 | -1.87923600 |
| H                                       | 4.61061500  | 1.24389900  | -3.63681800                             | H  | -2.21012700 | -3.68710100 | -0.78383800 |
| H                                       | 4.93876000  | 0.53242100  | -2.03723400                             | H  | -3.86493000 | -4.29627500 | -0.46757000 |

|   |             |             |             |   |             |             |             |
|---|-------------|-------------|-------------|---|-------------|-------------|-------------|
| H | 4.09147100  | -0.30609900 | -0.42369100 | H | -3.62087700 | -0.41379500 | 1.95532500  |
| H | 3.19419500  | 1.22130900  | -0.28705300 | H | -3.42800600 | 0.55169600  | 0.47735900  |
| H | 3.44309000  | 0.18741700  | 2.30660400  | H | -2.52213800 | 2.20555700  | 2.47058400  |
| H | 2.35278100  | 1.41724300  | 1.62170200  | H | -2.16457500 | 2.22203700  | 0.72517900  |
| H | 1.59149500  | -0.98427100 | 3.36782700  | H | -0.14995400 | 2.38129700  | 3.03379600  |
| H | 1.45610400  | 0.72211500  | 3.75910600  | H | -0.54781400 | 3.63228500  | 1.86640200  |
| C | -0.72464400 | 1.23757400  | 2.73474600  | C | 0.91079700  | 2.96179900  | -0.01069700 |
| C | -0.42033800 | 2.37093300  | 1.75982600  | C | -0.01611500 | 2.72502400  | -1.19864000 |
| O | -0.49542700 | 3.54874400  | 2.10324100  | O | -0.31690700 | 3.63448500  | -1.96816500 |
| O | -0.13874400 | 1.97745200  | 0.53917100  | O | -0.39694800 | 1.47669900  | -1.35202800 |
| H | -0.51788500 | 1.54919000  | 3.76953100  | H | 0.86359400  | 4.01235200  | 0.31200100  |
| H | -1.80640600 | 1.04931000  | 2.64559700  | H | 1.92811500  | 2.76694500  | -0.38527900 |

**Table S31** Atomic coordinates (x,y,z) of [ScF(L<sup>120</sup>)]<sup>+</sup> isomers.

| [ScF(L <sup>120</sup> )] <sup>+</sup> Δ |             |             |             | [ScF(L <sup>120</sup> )] <sup>+</sup> Λ |             |             |             |
|-----------------------------------------|-------------|-------------|-------------|-----------------------------------------|-------------|-------------|-------------|
| Sc                                      | 0.00000000  | 0.00000000  | 0.00000000  | Sc                                      | 0.00000000  | 0.00000000  | 0.00000000  |
| N                                       | -0.83324400 | 1.88357200  | 1.35742500  | N                                       | 0.83326200  | 1.88354700  | 1.35756300  |
| C                                       | 0.20916900  | 2.45516300  | 2.26150000  | C                                       | -0.20893000 | 2.45505800  | 2.26192600  |
| C                                       | 1.61989300  | 1.97798400  | 1.94160600  | C                                       | -1.61971300 | 1.97801200  | 1.94221400  |
| N                                       | 1.65485100  | 0.51111800  | 1.74194900  | N                                       | -1.65479000 | 0.51119400  | 1.74237300  |
| C                                       | 1.37813300  | -0.23275400 | 3.01193800  | C                                       | -1.37784200 | -0.23288500 | 3.01216600  |
| C                                       | 0.33505700  | -1.33845000 | 2.86628100  | C                                       | -0.33477200 | -1.33855600 | 2.86622200  |
| N                                       | -0.85168600 | -0.85350600 | 2.12690700  | N                                       | 0.85191500  | -0.85355600 | 2.12686500  |
| C                                       | -1.62763600 | 0.14903800  | 2.92283500  | C                                       | 1.62790000  | 0.14899600  | 2.92274800  |
| C                                       | -1.99546800 | 1.40047400  | 2.13018800  | C                                       | 1.99563500  | 1.40045700  | 2.13008600  |
| H                                       | -2.36223700 | 2.17260900  | 2.83112000  | H                                       | 2.36248400  | 2.17256200  | 2.83101000  |
| H                                       | -2.80099800 | 1.18745000  | 1.41950100  | H                                       | 2.80108000  | 1.18751500  | 1.41927300  |
| H                                       | -1.03324900 | 0.42258900  | 3.80207900  | H                                       | 1.03355800  | 0.42252200  | 3.80203400  |
| H                                       | -2.54927600 | -0.31297100 | 3.30986600  | H                                       | 2.54958100  | -0.31299400 | 3.30970800  |
| C                                       | -1.72400900 | -1.96480400 | 1.71431000  | C                                       | 1.72426900  | -1.96477100 | 1.71414500  |
| C                                       | -2.59994200 | -1.46521100 | 0.57829400  | C                                       | 2.60029000  | -1.46480600 | 0.57834600  |
| O                                       | -2.14226900 | -0.51598000 | -0.12544500 | N                                       | 3.78712400  | -2.00154100 | 0.32021700  |
| N                                       | -3.78617500 | -2.00299700 | 0.31967600  | C                                       | 4.59409100  | -1.47465000 | -0.78233200 |
| C                                       | -4.59360100 | -1.47635200 | -0.78265900 | H                                       | 4.41733100  | -0.39982100 | -0.89744700 |
| H                                       | -5.65178900 | -1.65104800 | -0.54994600 | H                                       | 5.65240100  | -1.64884700 | -0.54979900 |
| H                                       | -4.41734800 | -0.40143100 | -0.89768100 | H                                       | 4.34607200  | -1.98730300 | -1.72563000 |
| H                                       | -4.34553400 | -1.98878500 | -1.72606300 | C                                       | 4.31231000  | -3.19714800 | 0.97897600  |
| C                                       | -4.31091200 | -3.19851700 | 0.97897000  | H                                       | 3.54928700  | -3.68417900 | 1.59256100  |
| H                                       | -4.63635300 | -3.90872500 | 0.20479300  | H                                       | 4.63566000  | -3.90802000 | 0.20450900  |
| H                                       | -3.54692100 | -3.68650000 | 1.59060700  | H                                       | 5.18047900  | -2.93963000 | 1.60450100  |
| H                                       | -5.17760200 | -2.94076700 | 1.60646800  | O                                       | 2.14206600  | -0.51605800 | -0.12566600 |
| H                                       | -1.10384500 | -2.78329800 | 1.31472500  | H                                       | 1.10416900  | -2.78311800 | 1.31415400  |
| H                                       | -2.30675100 | -2.35662900 | 2.56065100  | H                                       | 2.30682700  | -2.35684100 | 2.56049200  |
| H                                       | 0.05971500  | -1.70233200 | 3.87280300  | H                                       | -0.05939300 | -1.70260200 | 3.87268100  |
| H                                       | 0.74606500  | -2.18518400 | 2.30460000  | H                                       | -0.74584000 | -2.18520300 | 2.30443900  |
| H                                       | 1.05518400  | 0.48897600  | 3.77087900  | H                                       | -1.05480200 | 0.48871300  | 3.77120600  |
| H                                       | 2.30867400  | -0.68091400 | 3.39338600  | H                                       | -2.30830300 | -0.68117300 | 3.39366500  |
| C                                       | 2.94644000  | 0.09733100  | 1.17109000  | C                                       | -2.94650200 | 0.09762400  | 1.17169600  |
| C                                       | 2.74972400  | -1.23247600 | 0.47217600  | C                                       | -2.75004800 | -1.23200300 | 0.47239600  |
| O                                       | 1.57101500  | -1.52756400 | 0.11129400  | O                                       | -1.57140900 | -1.52700700 | 0.11124000  |
| N                                       | 3.76952300  | -2.04559600 | 0.22405000  | N                                       | -3.76996900 | -2.04493400 | 0.22417400  |
| C                                       | 3.53897900  | -3.31061200 | -0.47594300 | C                                       | -5.17021500 | -1.70382000 | 0.47168000  |
| H                                       | 2.53884600  | -3.69197800 | -0.24466300 | H                                       | -5.28051900 | -0.66151400 | 0.78301600  |
| H                                       | 3.63376100  | -3.17269200 | -1.56510800 | H                                       | -5.73687700 | -1.84790300 | -0.46024800 |
| H                                       | 4.29435600  | -4.03367400 | -0.14191200 | H                                       | -5.59129400 | -2.36450100 | 1.24455900  |
| C                                       | 5.16991600  | -1.70434500 | 0.47056100  | C                                       | -3.53983300 | -3.30983800 | -0.47613800 |
| H                                       | 5.59172600  | -2.36538200 | 1.24272800  | H                                       | -3.63645200 | -3.17196600 | -1.56514600 |
| H                                       | 5.73584900  | -1.84780200 | -0.46191500 | H                                       | -2.53912400 | -3.69063000 | -0.24645000 |
| H                                       | 5.28027500  | -0.66220300 | 0.78241500  | H                                       | -4.29427800 | -4.03333800 | -0.14091700 |

|   |             |             |             |   |             |             |             |
|---|-------------|-------------|-------------|---|-------------|-------------|-------------|
| H | 3.73361000  | 0.05853800  | 1.93856000  | H | -3.73353000 | 0.05874000  | 1.93931000  |
| H | 3.25349200  | 0.82652600  | 0.40474200  | H | -3.25365300 | 0.82697100  | 0.40553000  |
| H | 2.29743400  | 2.28663800  | 2.75847500  | H | -2.29707300 | 2.28660800  | 2.75926500  |
| H | 1.98152500  | 2.43942800  | 1.01517400  | H | -1.98153200 | 2.43960800  | 1.01593000  |
| H | -0.04636900 | 2.19689900  | 3.29589500  | H | 0.04677200  | 2.19656200  | 3.29622200  |
| H | 0.19019800  | 3.55528700  | 2.20905700  | H | -0.18987300 | 3.55519200  | 2.20968700  |
| C | -1.21370400 | 2.85630700  | 0.32259600  | C | 1.21339500  | 2.85633400  | 0.32268100  |
| C | -0.13389500 | 2.92118800  | -0.75464400 | C | 0.13322000  | 2.92126700  | -0.75417400 |
| O | 0.05060900  | 3.95114700  | -1.41054700 | O | -0.05176400 | 3.95135400  | -1.40976000 |
| O | 0.51743800  | 1.80792400  | -0.93375600 | O | -0.51797500 | 1.80791000  | -0.93336100 |
| H | -1.40965800 | 3.85999600  | 0.73423000  | H | 1.40951100  | 3.86000100  | 0.73429600  |
| H | -2.13199600 | 2.50231500  | -0.17318300 | H | 2.13149800  | 2.50235000  | -0.17345900 |
| F | -0.08060500 | -0.71640200 | -1.81397200 | F | 0.08057400  | -0.71645200 | -1.81404300 |

**Table S32** Atomic coordinates (x,y,z) of  $[\text{Sc}(\text{OH}_2)(\text{L}^{120})]^{2+}$  isomers.

| $[\text{Sc}(\text{OH}_2)(\text{L}^{120})]^{2+} \Delta$ |             |             |             | $[\text{Sc}(\text{OH}_2)(\text{L}^{120})]^{2+} \Lambda$ |             |             |             |
|--------------------------------------------------------|-------------|-------------|-------------|---------------------------------------------------------|-------------|-------------|-------------|
| Sc                                                     | 0.00000000  | 0.00000000  | 0.00000000  | Sc                                                      | 0.00000000  | 0.00000000  | 0.00000000  |
| N                                                      | -0.80381200 | 1.88947600  | 1.26345800  | N                                                       | 0.80184300  | 1.88691400  | 1.26735900  |
| C                                                      | 0.24388600  | 2.47664400  | 2.15351000  | C                                                       | -0.25276100 | 2.47742000  | 2.14726200  |
| C                                                      | 1.64588800  | 1.98103500  | 1.82424000  | C                                                       | -1.65281700 | 1.98465100  | 1.80574500  |
| N                                                      | 1.65575600  | 0.50696600  | 1.65213300  | N                                                       | -1.66425500 | 0.51030700  | 1.63420000  |
| C                                                      | 1.40330800  | -0.20280200 | 2.94847200  | C                                                       | -1.42523000 | -0.19948800 | 2.93335400  |
| C                                                      | 0.35844800  | -1.30804700 | 2.83828100  | C                                                       | -0.38096800 | -1.30653400 | 2.83367900  |
| N                                                      | -0.82971400 | -0.83450200 | 2.08605400  | N                                                       | 0.81423500  | -0.83543300 | 2.09105400  |
| C                                                      | -1.60483300 | 0.18616200  | 2.86394700  | C                                                       | 1.58482700  | 0.18327600  | 2.87580100  |
| C                                                      | -1.97323300 | 1.41167200  | 2.03611900  | C                                                       | 1.96312900  | 1.40799600  | 2.05164400  |
| H                                                      | -2.35898700 | 2.19950100  | 2.70718600  | H                                                       | 2.34277200  | 2.19572400  | 2.72627400  |
| H                                                      | -2.76433600 | 1.16893500  | 1.31702600  | H                                                       | 2.76094400  | 1.16403900  | 1.34063000  |
| H                                                      | -1.00670300 | 0.48126500  | 3.73345100  | H                                                       | 0.97970800  | 0.47966000  | 3.74004600  |
| H                                                      | -2.52504400 | -0.26727400 | 3.26198900  | H                                                       | 2.50040400  | -0.27242600 | 3.28184600  |
| C                                                      | -1.69809800 | -1.96187100 | 1.69999500  | C                                                       | 1.68338900  | -1.96375100 | 1.70971100  |
| C                                                      | -2.53032000 | -1.53382900 | 0.50658800  | C                                                       | 2.52167800  | -1.53936600 | 0.51881100  |
| O                                                      | -2.03438600 | -0.63331900 | -0.24727500 | N                                                       | 3.68072600  | -2.11312800 | 0.24252700  |
| N                                                      | -3.70030000 | -2.08738100 | 0.23632900  | C                                                       | 4.45662700  | -1.68031500 | -0.92232700 |
| C                                                      | -4.47359500 | -1.64308900 | -0.92602100 | H                                                       | 4.25005500  | -0.62784800 | -1.14155100 |
| H                                                      | -5.54034600 | -1.74503000 | -0.68866500 | H                                                       | 5.52234400  | -1.80623800 | -0.69200300 |
| H                                                      | -4.24568100 | -0.59622200 | -1.15096100 | H                                                       | 4.20461600  | -2.29549000 | -1.80054200 |
| H                                                      | -4.24024500 | -2.26725800 | -1.80299600 | C                                                       | 4.22114900  | -3.25985500 | 0.97537000  |
| C                                                      | -4.26228900 | -3.21615400 | 0.98117000  | H                                                       | 3.46111400  | -3.72488000 | 1.60928100  |
| H                                                      | -4.64288200 | -3.94911500 | 0.25631200  | H                                                       | 4.56170200  | -4.00562400 | 0.24346100  |
| H                                                      | -3.50357500 | -3.70713500 | 1.59691400  | H                                                       | 5.07980800  | -2.95005300 | 1.58981700  |
| H                                                      | -5.09650600 | -2.87921900 | 1.61475000  | O                                                       | 2.04137500  | -0.62494300 | -0.22805000 |
| H                                                      | -1.06956100 | -2.80301800 | 1.36678900  | H                                                       | 1.05553500  | -2.80512100 | 1.37577600  |
| H                                                      | -2.30850000 | -2.30438600 | 2.54692700  | H                                                       | 2.29066200  | -2.30549700 | 2.55932000  |
| H                                                      | 0.07912900  | -1.64226900 | 3.85276400  | H                                                       | -0.11097500 | -1.63953200 | 3.85106900  |
| H                                                      | 0.76305500  | -2.17211800 | 2.29907000  | H                                                       | -0.78227500 | -2.17089900 | 2.29247400  |
| H                                                      | 1.08969100  | 0.54033700  | 3.68972200  | H                                                       | -1.11773900 | 0.54361300  | 3.67712000  |
| H                                                      | 2.34063200  | -0.63833400 | 3.32613800  | H                                                       | -2.36696300 | -0.63329800 | 3.30183500  |
| C                                                      | 2.92693600  | 0.06109700  | 1.05049100  | C                                                       | -2.93141100 | 0.06739100  | 1.02198300  |
| C                                                      | 2.69212200  | -1.27989000 | 0.38786200  | C                                                       | -2.69640700 | -1.27889000 | 0.37094600  |
| O                                                      | 1.49774200  | -1.54859500 | 0.03820400  | O                                                       | -1.50118800 | -1.54972300 | 0.02491800  |
| N                                                      | 3.68542600  | -2.12332600 | 0.15985500  | N                                                       | -3.68957800 | -2.12424000 | 0.15087100  |
| C                                                      | 3.42699000  | -3.42045600 | -0.46888100 | C                                                       | -5.09389800 | -1.81737700 | 0.43227300  |
| H                                                      | 2.38865900  | -3.72024500 | -0.29577200 | H                                                       | -5.25697600 | -0.73986000 | 0.52596700  |
| H                                                      | 3.62038800  | -3.36605500 | -1.55175100 | H                                                       | -5.69931700 | -2.18277000 | -0.40863900 |
| H                                                      | 4.10396900  | -4.16142200 | -0.02333300 | H                                                       | -5.42182400 | -2.32597900 | 1.35159600  |
| C                                                      | 5.09066500  | -1.81787200 | 0.43680500  | C                                                       | -3.43223100 | -3.42931100 | -0.46152300 |
| H                                                      | 5.42968300  | -2.35304700 | 1.33677200  | H                                                       | -3.64085700 | -3.39227000 | -1.54223100 |
| H                                                      | 5.69019700  | -2.15370400 | -0.42071800 | H                                                       | -2.39000300 | -3.72053500 | -0.29797800 |
| H                                                      | 5.24915400  | -0.74308000 | 0.56320100  | H                                                       | -4.09884400 | -4.16724400 | 0.00441900  |

|   |             |             |             |   |             |             |             |
|---|-------------|-------------|-------------|---|-------------|-------------|-------------|
| H | 3.73347900  | 0.03161500  | 1.79650800  | H | -3.74581600 | 0.04788900  | 1.75960500  |
| H | 3.21794600  | 0.76896400  | 0.25827300  | H | -3.20960600 | 0.77139200  | 0.22170700  |
| H | 2.34045600  | 2.29124500  | 2.62438300  | H | -2.35388900 | 2.29626800  | 2.59957000  |
| H | 1.99867500  | 2.41984200  | 0.88356800  | H | -1.99657800 | 2.42370000  | 0.86186400  |
| H | -0.00829700 | 2.24115700  | 3.19388600  | H | -0.01107400 | 2.24235200  | 3.19020100  |
| H | 0.22916100  | 3.57439200  | 2.07516600  | H | -0.23493900 | 3.57504100  | 2.06798400  |
| C | -1.19008100 | 2.84482200  | 0.20882800  | C | 1.20099600  | 2.84088300  | 0.21637300  |
| C | -0.14868200 | 2.84898600  | -0.90628500 | C | 0.17058500  | 2.84856100  | -0.90851100 |
| O | 0.01429300  | 3.83081700  | -1.63102100 | O | 0.01951700  | 3.83006900  | -1.63623800 |
| O | 0.49790000  | 1.72015600  | -1.04236300 | O | -0.47962100 | 1.72249900  | -1.04969000 |
| H | -1.34815700 | 3.86215300  | 0.59925500  | H | 1.35888200  | 3.85770200  | 0.60824700  |
| H | -2.13182700 | 2.50175800  | -0.24884500 | H | 2.14581300  | 2.49468300  | -0.23246200 |
| O | 0.04569400  | -0.72704000 | -2.20469500 | O | -0.03488000 | -0.75812700 | -2.19607300 |
| H | 0.49431900  | -1.59027200 | -2.24073400 | H | -0.71470600 | -1.45168300 | -2.26616100 |
| H | 0.64535000  | -0.12613200 | -2.68127200 | H | -0.38690900 | -0.02328300 | -2.72940500 |

**Table S33** Atomic coordinates (x,y,z) of [Sc(OH)(L<sup>120</sup>)]<sup>+</sup> isomers.

| [Sc(OH)(L <sup>120</sup> )] <sup>+</sup> Δ |             |             |             | [Sc(OH)(L <sup>120</sup> )] <sup>+</sup> Λ |             |             |             |
|--------------------------------------------|-------------|-------------|-------------|--------------------------------------------|-------------|-------------|-------------|
| Sc                                         | 0.00000000  | 0.00000000  | 0.00000000  | Sc                                         | 0.00000000  | 0.00000000  | 0.00000000  |
| N                                          | -0.83332300 | 1.87632800  | 1.36677300  | N                                          | 0.83336100  | 1.87629400  | 1.36681900  |
| C                                          | 0.21565700  | 2.44288400  | 2.26644000  | C                                          | -0.21562100 | 2.44285800  | 2.26648200  |
| C                                          | 1.62562900  | 1.95904300  | 1.94424000  | C                                          | -1.62560400 | 1.95908100  | 1.94425000  |
| N                                          | 1.65407800  | 0.49190900  | 1.74984200  | N                                          | -1.65409000 | 0.49195400  | 1.74980800  |
| C                                          | 1.38074600  | -0.24284000 | 3.02459600  | C                                          | -1.38078700 | -0.24283100 | 3.02455300  |
| C                                          | 0.33583300  | -1.34751300 | 2.88881600  | C                                          | -0.33588800 | -1.34752300 | 2.88880600  |
| N                                          | -0.84732600 | -0.86685400 | 2.14228600  | N                                          | 0.84729400  | -0.86690100 | 2.14230500  |
| C                                          | -1.62448300 | 0.13775800  | 2.93352600  | C                                          | 1.62445500  | 0.13769400  | 2.93355800  |
| C                                          | -1.99337200 | 1.38674400  | 2.13822000  | C                                          | 1.99338200  | 1.38668900  | 2.13828900  |
| H                                          | -2.36727100 | 2.15747500  | 2.83730600  | H                                          | 2.36725300  | 2.15739700  | 2.83741500  |
| H                                          | -2.79567100 | 1.16865600  | 1.42486300  | H                                          | 2.79571000  | 1.16862000  | 1.42495900  |
| H                                          | -1.03104800 | 0.41518300  | 3.81234600  | H                                          | 1.03101300  | 0.41511400  | 3.81237600  |
| H                                          | -2.54648500 | -0.32290000 | 3.32174700  | H                                          | 2.54644400  | -0.32298700 | 3.32178700  |
| C                                          | -1.71482900 | -1.98276900 | 1.73535500  | C                                          | 1.71479100  | -1.98280700 | 1.73537000  |
| C                                          | -2.58715800 | -1.50087000 | 0.58990100  | C                                          | 2.58712100  | -1.50088800 | 0.58991800  |
| O                                          | -2.13316000 | -0.55738800 | -0.12329200 | N                                          | 3.76714700  | -2.05287700 | 0.33050200  |
| N                                          | -3.76721100 | -2.05282600 | 0.33052400  | C                                          | 4.57395800  | -1.54902700 | -0.78260100 |
| C                                          | -4.57401400 | -1.54901500 | -0.78259800 | H                                          | 4.39136800  | -0.47862500 | -0.92501600 |
| H                                          | -5.63293900 | -1.71143800 | -0.54369000 | H                                          | 5.63287300  | -1.71161300 | -0.54376700 |
| H                                          | -4.39129400 | -0.47865700 | -0.92516000 | H                                          | 4.33114800  | -2.08669500 | -1.71328000 |
| H                                          | -4.33132200 | -2.08683700 | -1.71322000 | C                                          | 4.28559400  | -3.24354500 | 1.00341600  |
| C                                          | -4.28568800 | -3.24348200 | 1.00343300  | H                                          | 3.51721000  | -3.72464300 | 1.61504800  |
| H                                          | -4.61316500 | -3.96135500 | 0.23726700  | H                                          | 4.61326700  | -3.96132700 | 0.23725100  |
| H                                          | -3.51739000 | -3.72447000 | 1.61525700  | H                                          | 5.14980700  | -2.98302300 | 1.63331200  |
| H                                          | -5.15004200 | -2.98296700 | 1.63313800  | O                                          | 2.13314500  | -0.55736000 | -0.12322200 |
| H                                          | -1.09034800 | -2.80332500 | 1.34685600  | H                                          | 1.09031500  | -2.80336200 | 1.34685900  |
| H                                          | -2.30105500 | -2.36923000 | 2.58200500  | H                                          | 2.30102600  | -2.36928000 | 2.58200900  |
| H                                          | 0.05731000  | -1.69959200 | 3.89885600  | H                                          | -0.05740500 | -1.69958200 | 3.89886600  |
| H                                          | 0.74582200  | -2.20122800 | 2.33788800  | H                                          | -0.74587400 | -2.20124700 | 2.33788700  |
| H                                          | 1.05961900  | 0.48433000  | 3.77905100  | H                                          | -1.05966900 | 0.48432300  | 3.77902900  |
| H                                          | 2.31208500  | -0.68835100 | 3.40780100  | H                                          | -2.31214400 | -0.68833400 | 3.40772700  |
| C                                          | 2.93430000  | 0.06068200  | 1.16855700  | C                                          | -2.93433500 | 0.06079000  | 1.16852800  |
| C                                          | 2.71785100  | -1.27906800 | 0.49107600  | C                                          | -2.71793600 | -1.27900000 | 0.49110600  |
| O                                          | 1.53391800  | -1.57563900 | 0.15164500  | O                                          | -1.53402300 | -1.57561200 | 0.15167400  |
| N                                          | 3.73182100  | -2.10001000 | 0.24021300  | N                                          | -3.73194900 | -2.09990700 | 0.24028300  |
| C                                          | 3.48436700  | -3.37429900 | -0.43664100 | C                                          | -5.13712000 | -1.76005300 | 0.45961100  |
| H                                          | 2.49299800  | -3.75585100 | -0.16981100 | H                                          | -5.25630600 | -0.71185900 | 0.74703600  |
| H                                          | 3.54460900  | -3.25060400 | -1.52995100 | H                                          | -5.68915600 | -1.92552300 | -0.47758400 |
| H                                          | 4.25167200  | -4.09101600 | -0.11665700 | H                                          | -5.56801500 | -2.40582800 | 1.23973900  |
| C                                          | 5.13701400  | -1.76025500 | 0.45957600  | C                                          | -3.48456400 | -3.37423600 | -0.43652300 |
| H                                          | 5.56786600  | -2.40614000 | 1.23963700  | H                                          | -3.54483700 | -3.25059000 | -1.52983700 |
| H                                          | 5.68903800  | -1.92566300 | -0.47763800 | H                                          | -2.49320100 | -3.75581500 | -0.16970700 |

|   |             |             |             |   |             |             |             |
|---|-------------|-------------|-------------|---|-------------|-------------|-------------|
| H | 5.25626100  | -0.71210000 | 0.74711200  | H | -4.25188500 | -4.09091000 | -0.11648100 |
| H | 3.73185200  | 0.02475500  | 1.92564100  | H | -3.73189900 | 0.02494900  | 1.92560300  |
| H | 3.23694300  | 0.77717500  | 0.38838800  | H | -3.23691000 | 0.77726300  | 0.38831500  |
| H | 2.30515200  | 2.26855900  | 2.75933900  | H | -2.30511500 | 2.26858500  | 2.75936200  |
| H | 1.98658800  | 2.41640600  | 1.01570900  | H | -1.98655300 | 2.41648200  | 1.01573300  |
| H | -0.03842500 | 2.18803300  | 3.30217300  | H | 0.03841800  | 2.18795700  | 3.30221300  |
| H | 0.20239500  | 3.54309100  | 2.21244000  | H | -0.20231500 | 3.54306700  | 2.21252300  |
| C | -1.22045100 | 2.85379900  | 0.33968100  | C | 1.22052800  | 2.85377000  | 0.33975000  |
| C | -0.14181900 | 2.93197900  | -0.73787600 | C | 0.14188800  | 2.93201000  | -0.73779900 |
| O | 0.02869200  | 3.96662600  | -1.39225300 | O | -0.02859000 | 3.96666600  | -1.39216500 |
| O | 0.52240800  | 1.82892500  | -0.91744100 | O | -0.52235500 | 1.82897100  | -0.91739700 |
| H | -1.42196300 | 3.85356600  | 0.75873100  | H | 1.42207400  | 3.85352100  | 0.75882200  |
| H | -2.13773300 | 2.49848900  | -0.15714300 | H | 2.13779200  | 2.49843100  | -0.15708500 |
| O | -0.00657800 | -0.62388400 | -1.92130100 | O | 0.00641700  | -0.62393000 | -1.92127400 |
| H | -0.15134300 | -1.58320900 | -1.97036000 | H | 0.15078500  | -1.58332200 | -1.97024300 |



**Table S34** Atomic coordinates (x,y,z) of [Sc(L<sup>030</sup>)]<sup>3+</sup> isomers.

| [Sc(L <sup>030</sup> )] <sup>3+</sup> Δ |             |             | [Sc(L <sup>030</sup> )] <sup>3+</sup> Λ |            |             |             |             |
|-----------------------------------------|-------------|-------------|-----------------------------------------|------------|-------------|-------------|-------------|
| Sc                                      | 0.00000000  | 0.00000000  | 0.00000000                              | 0.00000000 | 0.00000000  |             |             |
| N                                       | -0.91628900 | -1.42532300 | 1.65767200                              | N          | -1.61538400 | -0.08059800 | 1.74638700  |
| C                                       | -1.69982200 | -0.66927100 | 2.68676200                              | C          | -1.29468000 | -1.13731300 | 2.75983500  |
| C                                       | -2.04044200 | 0.74149800  | 2.23195200                              | C          | -0.24704000 | -2.12430100 | 2.26420100  |
| N                                       | -0.83875400 | 1.43384100  | 1.68978700                              | N          | 0.91857100  | -1.41850400 | 1.66630100  |
| C                                       | 0.18220000  | 1.69750000  | 2.75675900                              | C          | 1.69701000  | -0.65592500 | 2.69436500  |
| C                                       | 1.58891700  | 1.28729200  | 2.34464500                              | C          | 2.03333100  | 0.75407700  | 2.23478100  |
| N                                       | 1.61309800  | -0.07771400 | 1.75074100                              | N          | 0.82973900  | 1.43908400  | 1.68752700  |
| C                                       | 1.29346700  | -1.14040400 | 2.75810600                              | C          | -0.19538700 | 1.70312900  | 2.75072500  |
| C                                       | 0.25148100  | -2.12892900 | 2.25398100                              | C          | -1.59980100 | 1.28646200  | 2.33559000  |
| H                                       | -0.06385000 | -2.78775300 | 3.08103400                              | H          | -2.27295000 | 1.34929000  | 3.20769800  |
| H                                       | 0.68182900  | -2.75789400 | 1.46341800                              | H          | -1.98161600 | 1.96881100  | 1.56467600  |
| H                                       | 0.96189500  | -0.65666300 | 3.68377000                              | H          | 0.11115900  | 1.18486200  | 3.66591200  |
| H                                       | 2.20552100  | -1.69845500 | 3.01378800                              | H          | -0.21054200 | 2.77524500  | 2.99435300  |
| C                                       | 2.92031500  | -0.33219400 | 1.10235000                              | C          | 1.22091000  | 2.69292700  | 1.00471900  |
| C                                       | 2.72499100  | -1.21810900 | -0.11000700                             | C          | 0.24331900  | 2.97976800  | -0.11421800 |
| O                                       | 1.58183400  | -1.17177600 | -0.68201200                             | N          | -0.02232000 | 4.20720900  | -0.52061900 |
| N                                       | 3.69217400  | -1.97537700 | -0.59207400                             | C          | 0.65033600  | 5.40658900  | -0.01538000 |
| C                                       | 3.45756900  | -2.80997000 | -1.77457800                             | H          | 0.99107500  | 5.99882700  | -0.87633200 |
| H                                       | 2.39898800  | -3.08035000 | -1.84130900                             | H          | -0.05441800 | 6.01135300  | 0.57429900  |
| H                                       | 3.75962700  | -2.27173300 | -2.68648900                             | H          | 1.52059300  | 5.15136900  | 0.59448400  |
| H                                       | 4.06526000  | -3.71867000 | -1.67829800                             | C          | -0.97590200 | 4.43298200  | -1.61110500 |
| C                                       | 5.06189500  | -1.98850700 | -0.07328800                             | H          | -1.48081400 | 5.39079500  | -1.43155700 |
| H                                       | 5.24559300  | -1.14785000 | 0.60079100                              | H          | -0.44727500 | 4.48202200  | -2.57575400 |
| H                                       | 5.25750200  | -2.93634600 | 0.44990300                              | H          | -1.71529500 | 3.62621800  | -1.63715100 |
| H                                       | 5.75128200  | -1.90594300 | -0.92520200                             | O          | -0.29802700 | 1.96770900  | -0.68073200 |
| H                                       | 3.32426200  | 0.61982200  | 0.72442100                              | H          | 2.20233100  | 2.54818700  | 0.52651700  |
| H                                       | 3.64090100  | -0.74440800 | 1.81968300                              | H          | 1.30825500  | 3.51642400  | 1.72386400  |
| H                                       | 2.25918000  | 1.35066200  | 3.21892200                              | H          | 2.46472100  | 1.32448900  | 3.07493900  |
| H                                       | 1.96965400  | 1.97380300  | 1.57688800                              | H          | 2.77786100  | 0.72326500  | 1.42816000  |
| H                                       | -0.12541600 | 1.17502700  | 3.66926900                              | H          | 1.11789500  | -0.63184500 | 3.62321100  |
| H                                       | 0.19333900  | 2.76870800  | 3.00464800                              | H          | 2.63209400  | -1.18637900 | 2.92584300  |
| C                                       | -1.23352100 | 2.68775900  | 1.00990100                              | C          | 1.78826000  | -2.37640900 | 0.94702900  |
| C                                       | -0.26307800 | 2.97682800  | -0.11495700                             | C          | 2.48108500  | -1.66167300 | -0.19378400 |
| O                                       | 0.28732000  | 1.96757000  | -0.67770600                             | O          | 1.82464300  | -0.72285900 | -0.76422800 |
| N                                       | -0.01206900 | 4.20536500  | -0.52731600                             | N          | 3.68744900  | -1.99840700 | -0.61024200 |
| C                                       | 0.93373600  | 4.43922500  | -1.62283500                             | C          | 4.32705400  | -1.25850600 | -1.70228300 |
| H                                       | 1.67113800  | 3.63130100  | -1.66234400                             | H          | 4.15927700  | -1.77298700 | -2.66110000 |
| H                                       | 0.39737900  | 4.49849200  | -2.58262900                             | H          | 3.92527600  | -0.24177700 | -1.75422200 |
| H                                       | 1.44210500  | 5.39442800  | -1.43858600                             | H          | 5.40566600  | -1.21948500 | -1.50210600 |
| C                                       | -0.69015900 | 5.39929400  | -0.01638500                             | C          | 4.45548900  | -3.12894800 | -0.08074900 |
| H                                       | -1.03106500 | 5.99474900  | -0.87487400                             | H          | 3.81406400  | -3.83354400 | 0.45508400  |
| H                                       | -1.56113400 | 5.13707600  | 0.58978700                              | H          | 4.91323400  | -3.65592900 | -0.92883200 |
| H                                       | 0.01056300  | 6.00352000  | 0.57874300                              | H          | 5.25351200  | -2.76674500 | 0.58457800  |

|   |             |             |             |   |             |             |             |
|---|-------------|-------------|-------------|---|-------------|-------------|-------------|
| H | -1.31710800 | 3.51182900  | 1.72900500  | H | 2.48415600  | -2.86718300 | 1.63815900  |
| H | -2.21789100 | 2.54390000  | 0.53737900  | H | 1.15818000  | -3.15211300 | 0.48466400  |
| H | -2.47653500 | 1.30664500  | 3.07327900  | H | 0.06955300  | -2.77554400 | 3.09673900  |
| H | -2.78314400 | 0.71034400  | 1.42358800  | H | -0.67232600 | -2.76117500 | 1.47732600  |
| H | -1.12349900 | -0.64706000 | 3.61722400  | H | -0.96754200 | -0.64793400 | 3.68399500  |
| H | -2.63380000 | -1.20378200 | 2.91351100  | H | -2.20555700 | -1.69737500 | 3.01525700  |
| C | -1.78159700 | -2.38421000 | 0.93414100  | C | -2.91869700 | -0.34626500 | 1.09417100  |
| C | -2.47651000 | -1.66667800 | -0.20412500 | C | -2.71289100 | -1.24935800 | -0.10385900 |
| O | -1.81869800 | -0.72819600 | -0.77422600 | O | -1.56943100 | -1.19830900 | -0.67507900 |
| N | -3.68395800 | -1.99769800 | -0.62227000 | N | -3.67037100 | -2.02561500 | -0.57480300 |
| C | -4.45739300 | -3.13067800 | -0.10812200 | C | -5.04055800 | -2.04679100 | -0.05756300 |
| H | -3.83617900 | -3.80296400 | 0.48859800  | H | -5.23640900 | -1.19510700 | 0.59927100  |
| H | -5.30141500 | -2.76610300 | 0.49607600  | H | -5.72935100 | -1.98988600 | -0.91203000 |
| H | -4.85228800 | -3.69296400 | -0.96569500 | H | -5.22478300 | -2.98671800 | 0.48370600  |
| C | -4.31096000 | -1.25774800 | -1.72201200 | C | -3.42402600 | -2.87563000 | -1.74383500 |
| H | -4.10283500 | -1.75342300 | -2.68288100 | H | -3.73049200 | -2.35504700 | -2.66448300 |
| H | -5.39511200 | -1.24897500 | -1.55228400 | H | -2.36227500 | -3.13468500 | -1.80445600 |
| H | -3.93412400 | -0.23040500 | -1.74856000 | H | -4.02132500 | -3.78971300 | -1.63441300 |
| H | -2.47372400 | -2.88112400 | 1.62439700  | H | -3.64298500 | -0.74948400 | 1.81290000  |
| H | -1.14747400 | -3.15439900 | 0.46828000  | H | -3.32130000 | 0.59949400  | 0.69935200  |

**Table S35** Atomic coordinates (x,y,z) of [ScF(L<sup>030</sup>)]<sup>2+</sup> isomers.

| [ScF(L <sup>030</sup> )] <sup>2+</sup> Δ |             |             |             | [ScF(L <sup>030</sup> )] <sup>2+</sup> Λ |             |             |             |
|------------------------------------------|-------------|-------------|-------------|------------------------------------------|-------------|-------------|-------------|
| Sc                                       | 0.00000000  | 0.00000000  | 0.00000000  | Sc                                       | 0.00000000  | 0.00000000  | 0.00000000  |
| N                                        | 0.02344000  | 0.01565200  | 2.45519000  | N                                        | 0.02088600  | 0.01248500  | 2.45713700  |
| C                                        | 1.40311900  | 0.01524600  | 3.03623400  | C                                        | 1.39898000  | 0.03146900  | 3.04086900  |
| C                                        | 2.48785200  | 0.32426300  | 2.01366800  | C                                        | 2.48791700  | -0.28041000 | 2.02346800  |
| N                                        | 2.28032300  | -0.46234000 | 0.77710200  | N                                        | 2.27361100  | 0.48802500  | 0.77659500  |
| C                                        | 2.52249600  | -1.92174300 | 1.00949000  | C                                        | 2.50671300  | 1.95206100  | 0.99147000  |
| C                                        | 1.42836500  | -2.81982100 | 0.44310900  | C                                        | 1.40641400  | 2.83808800  | 0.41794700  |
| N                                        | 0.08488200  | -2.30607000 | 0.79621100  | N                                        | 0.06589900  | 2.32069700  | 0.77588300  |
| C                                        | -0.19251900 | -2.44134700 | 2.26165700  | C                                        | -0.21319600 | 2.46513900  | 2.23971000  |
| C                                        | -0.74555600 | -1.16971900 | 2.89649500  | C                                        | -0.76049800 | 1.19532800  | 2.88270400  |
| H                                        | -0.71894400 | -1.27706300 | 3.99569300  | H                                        | -0.74210700 | 1.31320400  | 3.98102900  |
| H                                        | -1.78890900 | -1.01239200 | 2.60157600  | H                                        | -1.80069400 | 1.02696200  | 2.58212100  |
| H                                        | 0.73377300  | -2.74403100 | 2.76257600  | H                                        | 0.71101400  | 2.77557200  | 2.73964600  |
| H                                        | -0.90933100 | -3.25934300 | 2.43139200  | H                                        | -0.93419500 | 3.28076100  | 2.40314700  |
| C                                        | -0.96247600 | -2.98243600 | 0.01192600  | C                                        | -0.98515700 | 2.98407800  | -0.01363600 |
| C                                        | -2.19516100 | -2.09878200 | 0.02091000  | C                                        | -2.21061000 | 2.09065400  | -0.00348300 |
| O                                        | -2.01034400 | -0.85368900 | 0.19062200  | N                                        | -3.43059000 | 2.57570800  | -0.18983800 |
| N                                        | -3.41177000 | -2.59237600 | -0.16465000 | C                                        | -3.71691600 | 3.96247700  | -0.55782500 |
| C                                        | -4.56614500 | -1.69066900 | -0.16071600 | H                                        | -4.34980900 | 3.96196500  | -1.45736200 |
| H                                        | -4.41204800 | -0.88379800 | 0.56413300  | H                                        | -4.25988700 | 4.46770800  | 0.25497600  |
| H                                        | -4.72266300 | -1.25631800 | -1.16104200 | H                                        | -2.80049800 | 4.51414400  | -0.78452800 |
| H                                        | -5.45442800 | -2.27023000 | 0.12015000  | C                                        | -4.57955600 | 1.66728800  | -0.18305600 |
| C                                        | -3.68880600 | -3.98110000 | -0.53183400 | H                                        | -5.46995500 | 2.24080200  | 0.10364800  |
| H                                        | -2.76791000 | -4.52930700 | -0.74854800 | H                                        | -4.73837300 | 1.23511400  | -1.18396400 |
| H                                        | -4.23676200 | -4.48640400 | 0.27752300  | H                                        | -4.41727300 | 0.85929500  | 0.53868800  |
| H                                        | -4.31367200 | -3.98588800 | -1.43700000 | O                                        | -2.01706800 | 0.84699300  | 0.16746000  |
| H                                        | -0.63166600 | -3.06799100 | -1.03559700 | H                                        | -0.65311900 | 3.06704000  | -1.06099200 |
| H                                        | -1.15909600 | -3.99445100 | 0.39378400  | H                                        | -1.19078800 | 3.99638700  | 0.36257600  |
| H                                        | 1.57564800  | -3.84661100 | 0.82323600  | H                                        | 1.54868100  | 3.86918800  | 0.78839200  |
| H                                        | 1.48673000  | -2.85731500 | -0.65079200 | H                                        | 1.46398400  | 2.86557400  | -0.67628900 |
| H                                        | 2.62500500  | -2.08686300 | 2.08799300  | H                                        | 2.61132800  | 2.13022000  | 2.06771900  |
| H                                        | 3.48497100  | -2.21685500 | 0.56391100  | H                                        | 3.46610100  | 2.24805000  | 0.53977100  |
| C                                        | 3.14271100  | 0.03977300  | -0.30473000 | C                                        | 3.13983900  | -0.02180100 | -0.29864600 |
| C                                        | 2.55166300  | -0.40966100 | -1.62483600 | C                                        | 2.54846100  | 0.41021600  | -1.62450300 |
| O                                        | 1.30098700  | -0.62285900 | -1.65144500 | O                                        | 1.29714500  | 0.62007800  | -1.65426500 |
| N                                        | 3.29824000  | -0.55543600 | -2.71180700 | N                                        | 3.29471800  | 0.54377900  | -2.71320400 |
| C                                        | 2.68023200  | -0.98530300 | -3.96777900 | C                                        | 2.67413400  | 0.95321800  | -3.97485200 |
| H                                        | 1.82107600  | -1.63222500 | -3.76202300 | H                                        | 2.33683600  | 0.07193800  | -4.54362500 |
| H                                        | 2.34925500  | -0.11313500 | -4.55404900 | H                                        | 1.81872500  | 1.60796700  | -3.77820600 |
| H                                        | 3.42834400  | -1.54091500 | -4.54798100 | H                                        | 3.42266000  | 1.49444100  | -4.56779300 |
| C                                        | 4.70796200  | -0.17451300 | -2.80059500 | C                                        | 4.70506500  | 0.16407200  | -2.79778500 |
| H                                        | 4.83270300  | 0.50875000  | -3.65371400 | H                                        | 5.04403400  | -0.33125700 | -1.88385800 |
| H                                        | 5.04344100  | 0.34021000  | -1.89613400 | H                                        | 4.82951800  | -0.53607300 | -3.63721300 |
| H                                        | 5.33095000  | -1.06565600 | -2.96936700 | H                                        | 5.32541700  | 1.05309300  | -2.98604800 |

|   |             |             |             |   |             |             |             |
|---|-------------|-------------|-------------|---|-------------|-------------|-------------|
| H | 4.18430800  | -0.28458700 | -0.17026400 | H | 4.17983200  | 0.30878300  | -0.16652700 |
| H | 3.12247200  | 1.14131900  | -0.29831800 | H | 3.12474800  | -1.12331000 | -0.28014800 |
| H | 3.47523300  | 0.11185100  | 2.46156600  | H | 3.47277300  | -0.05217600 | 2.46903000  |
| H | 2.47031000  | 1.38359800  | 1.73367000  | H | 2.48114600  | -1.34338800 | 1.75757900  |
| H | 1.58636600  | -0.96346300 | 3.49340400  | H | 1.57297800  | 1.01712500  | 3.48673600  |
| H | 1.46679400  | 0.74997400  | 3.85374200  | H | 1.46728900  | -0.69310400 | 3.86706200  |
| C | -0.67900000 | 1.26122100  | 2.80830400  | C | -0.67066700 | -1.23602100 | 2.82039500  |
| C | -0.14739200 | 2.36324500  | 1.91378100  | C | -0.12492200 | -2.34142500 | 1.93823000  |
| O | 0.29165400  | 2.01362900  | 0.77294300  | O | 0.32163500  | -1.99736700 | 0.79866600  |
| N | -0.15438900 | 3.63785700  | 2.27718700  | N | -0.12830000 | -3.61339500 | 2.31105000  |
| C | -0.79204100 | 4.14994300  | 3.49004000  | C | -0.77636100 | -4.11958300 | 3.52080900  |
| H | -1.26361100 | 3.34794600  | 4.06379700  | H | -1.24986800 | -3.31438800 | 4.08843300  |
| H | -0.04554700 | 4.65815200  | 4.11784900  | H | -1.55048500 | -4.84616700 | 3.23140800  |
| H | -1.56648300 | 4.87729700  | 3.20368900  | H | -0.03569900 | -4.62735500 | 4.15577600  |
| C | 0.34906500  | 4.64956100  | 1.34381000  | C | 0.38526300  | -4.63010600 | 1.38880400  |
| H | -0.41982900 | 4.90697800  | 0.59820000  | H | -0.38005400 | -4.90085100 | 0.64417200  |
| H | 0.60722600  | 5.54764900  | 1.91757600  | H | 1.27531900  | -4.25504000 | 0.87095900  |
| H | 1.24095500  | 4.27644400  | 0.82756900  | H | 0.64901100  | -5.52059900 | 1.97187700  |
| H | -0.58093600 | 1.48843200  | 3.87885000  | H | -0.57345300 | -1.45231100 | 3.89334300  |
| H | -1.75009200 | 1.14822700  | 2.57663300  | H | -1.74216700 | -1.13568600 | 2.58493800  |
| F | -0.86649700 | 0.96325100  | -1.44547000 | F | -0.84991100 | -0.99532400 | -1.43256700 |

**Table S36** Atomic coordinates (x,y,z) of [Sc(OH<sub>2</sub>)(L<sup>030</sup>)]<sup>3+</sup> isomers.

| [Sc(OH <sub>2</sub> )(L <sup>030</sup> )] <sup>3+</sup> Δ |             |             |             | [Sc(OH <sub>2</sub> )(L <sup>030</sup> )] <sup>3+</sup> Λ |             |             |             |
|-----------------------------------------------------------|-------------|-------------|-------------|-----------------------------------------------------------|-------------|-------------|-------------|
| Sc                                                        | 0.00000000  | 0.00000000  | 0.00000000  | Sc                                                        | 0.00000000  | 0.00000000  | 0.00000000  |
| N                                                         | 0.00000000  | 0.00000000  | 2.39568200  | N                                                         | -1.65745800 | -0.00591800 | 1.70877700  |
| C                                                         | 1.38091800  | 0.00000000  | 2.98181400  | C                                                         | -1.39652600 | -1.07482900 | 2.73392900  |
| C                                                         | 2.45765500  | 0.33496100  | 1.96149500  | C                                                         | -0.36628900 | -2.10629300 | 2.28540800  |
| N                                                         | 2.24628200  | -0.43352400 | 0.70933100  | N                                                         | 0.82633400  | -1.43352200 | 1.70573600  |
| C                                                         | 2.50149900  | -1.89843400 | 0.91328000  | C                                                         | 1.60183800  | -0.68244900 | 2.75274900  |
| C                                                         | 1.40704500  | -2.78621300 | 0.33450200  | C                                                         | 1.98725400  | 0.72976000  | 2.32396100  |
| N                                                         | 0.06300900  | -2.28002500 | 0.71014000  | N                                                         | 0.81652500  | 1.42573600  | 1.72968100  |
| C                                                         | -0.21080600 | -2.45376800 | 2.17398300  | C                                                         | -0.23083700 | 1.71422700  | 2.76813900  |
| C                                                         | -0.76579100 | -1.19522600 | 2.82946500  | C                                                         | -1.64106900 | 1.34928800  | 2.32012300  |
| H                                                         | -0.73056100 | -1.31085500 | 3.92645000  | H                                                         | -2.32318200 | 1.40573300  | 3.18517200  |
| H                                                         | -1.81088100 | -1.03750100 | 2.54126600  | H                                                         | -2.00560800 | 2.05286200  | 1.56292300  |
| H                                                         | 0.71700700  | -2.76534900 | 2.66586900  | H                                                         | 0.03122900  | 1.16468300  | 3.67825900  |
| H                                                         | -0.92600800 | -3.27607100 | 2.32334200  | H                                                         | -0.20601600 | 2.77882100  | 3.04233700  |
| C                                                         | -0.98965400 | -2.93283000 | -0.09326800 | C                                                         | 1.21990800  | 2.67278000  | 1.04390300  |
| C                                                         | -2.20399700 | -2.02664100 | -0.10333600 | C                                                         | 0.15990900  | 2.99037400  | 0.00247500  |
| N                                                         | -3.41741100 | -2.47981000 | -0.36761800 | N                                                         | -0.03852000 | 4.20657000  | -0.46393200 |
| C                                                         | -3.70620400 | -3.85081100 | -0.79058500 | C                                                         | 0.75386000  | 5.37557200  | -0.07578000 |
| H                                                         | -4.24663300 | -3.81403000 | -1.74788000 | H                                                         | 1.10275400  | 5.87540800  | -0.99010600 |
| H                                                         | -4.34276400 | -4.34792900 | -0.04413900 | H                                                         | 0.12648500  | 6.07386100  | 0.49719800  |
| H                                                         | -2.78874600 | -4.42797200 | -0.93311900 | H                                                         | 1.62602000  | 5.09062700  | 0.51785600  |
| C                                                         | -4.54980700 | -1.55002800 | -0.40703100 | C                                                         | -1.07122800 | 4.45668300  | -1.47550900 |
| H                                                         | -5.46176200 | -2.10864900 | -0.16236600 | H                                                         | -1.63845200 | 5.34944900  | -1.17883900 |
| H                                                         | -4.65428200 | -1.11543500 | -1.41382000 | H                                                         | -0.59402200 | 4.64054300  | -2.44987300 |
| H                                                         | -4.40350500 | -0.74734500 | 0.32341400  | H                                                         | -1.73754500 | 3.59267700  | -1.54387000 |
| O                                                         | -1.99710300 | -0.78795000 | 0.11966300  | O                                                         | -0.51731800 | 1.99450100  | -0.42272200 |
| H                                                         | -0.64535300 | -3.02049700 | -1.13624700 | H                                                         | 2.16590700  | 2.49825600  | 0.50738200  |
| H                                                         | -1.21118700 | -3.94200800 | 0.28018600  | H                                                         | 1.38361600  | 3.48892800  | 1.75997000  |
| H                                                         | 1.55475500  | -3.82100400 | 0.68883300  | H                                                         | 2.38055400  | 1.27842400  | 3.19617500  |
| H                                                         | 1.45722000  | -2.79539900 | -0.76065800 | H                                                         | 2.77494700  | 0.70778700  | 1.56226300  |
| H                                                         | 2.61236300  | -2.08241000 | 1.98761300  | H                                                         | 1.00060300  | -0.65194400 | 3.66739600  |
| H                                                         | 3.46147600  | -2.17645500 | 0.45354700  | H                                                         | 2.51390400  | -1.23862200 | 3.01234300  |
| C                                                         | 3.10002000  | 0.10145700  | -0.36766600 | C                                                         | 1.71040700  | -2.39944900 | 1.01716300  |
| C                                                         | 2.47626900  | -0.25925900 | -1.69821000 | C                                                         | 2.52589700  | -1.62491700 | -0.00483300 |
| O                                                         | 1.22480400  | -0.50039400 | -1.69901200 | O                                                         | 1.99968900  | -0.54143700 | -0.42873400 |
| N                                                         | 3.17582000  | -0.28045800 | -2.82035600 | N                                                         | 3.69023700  | -2.04720700 | -0.45523600 |
| C                                                         | 2.49905800  | -0.55664500 | -4.09087400 | C                                                         | 4.42937200  | -1.26709700 | -1.45387500 |
| H                                                         | 2.06543200  | 0.36834600  | -4.50302200 | H                                                         | 4.35929700  | -1.76394000 | -2.43333500 |
| H                                                         | 1.70462700  | -1.29582600 | -3.94261300 | H                                                         | 4.01290100  | -0.25829500 | -1.51657000 |
| H                                                         | 3.24082500  | -0.94995400 | -4.79650600 | H                                                         | 5.48340600  | -1.22275900 | -1.14780200 |
| C                                                         | 4.57237400  | 0.14381400  | -2.92557400 | C                                                         | 4.31666000  | -3.31164100 | -0.06241100 |
| H                                                         | 4.97670900  | 0.44005800  | -1.95418000 | H                                                         | 3.63698400  | -3.93148900 | 0.52732800  |
| H                                                         | 4.63096800  | 1.00440900  | -3.60896200 | H                                                         | 4.58754100  | -3.86163000 | -0.97434800 |
| H                                                         | 5.17740500  | -0.67649400 | -3.33761800 | H                                                         | 5.22892300  | -3.10648000 | 0.51641400  |

|   |             |             |             |   |             |             |             |
|---|-------------|-------------|-------------|---|-------------|-------------|-------------|
| H | 4.13472300  | -0.25363700 | -0.26950700 | H | 2.32695300  | -2.95647300 | 1.73449200  |
| H | 3.10842900  | 1.20127100  | -0.30555400 | H | 1.09506900  | -3.12721500 | 0.46476400  |
| H | 3.44948100  | 0.11948500  | 2.39535200  | H | -0.09075700 | -2.74049400 | 3.14456900  |
| H | 2.43114900  | 1.39883400  | 1.69928700  | H | -0.78080900 | -2.76014900 | 1.50917500  |
| H | 1.56988500  | -0.98554100 | 3.42066800  | H | -1.06966900 | -0.58760500 | 3.65868800  |
| H | 1.43594700  | 0.72174800  | 3.81046000  | H | -2.33374300 | -1.59262500 | 2.98379500  |
| C | -0.71566600 | 1.23792000  | 2.75547000  | C | -2.93925200 | -0.25841100 | 1.01511100  |
| C | -0.23059500 | 2.34704800  | 1.84503200  | C | -2.69258700 | -1.32532900 | -0.03606300 |
| O | 0.21228700  | 1.99897900  | 0.69880800  | O | -1.49794500 | -1.40197000 | -0.48138200 |
| N | -0.28727500 | 3.61436300  | 2.21188000  | N | -3.64817000 | -2.11143100 | -0.48869800 |
| C | -0.88321700 | 4.06178900  | 3.47451900  | C | -5.04923200 | -2.02747100 | -0.06824600 |
| H | -1.60506800 | 3.33314600  | 3.85551500  | H | -5.25073400 | -1.10158200 | 0.47663600  |
| H | -1.41622800 | 5.00231800  | 3.28269900  | H | -5.67929700 | -2.04386400 | -0.96796900 |
| H | -0.10142500 | 4.24340200  | 4.22745800  | H | -5.30092900 | -2.89369200 | 0.56117700  |
| C | 0.21923000  | 4.67230000  | 1.33509700  | C | -3.35682500 | -3.13163200 | -1.50168000 |
| H | -0.61531200 | 5.16274200  | 0.81064700  | H | -3.78503400 | -2.82267200 | -2.46704800 |
| H | 0.91794700  | 4.25131900  | 0.60581100  | H | -2.27521200 | -3.25892800 | -1.59645500 |
| H | 0.73604800  | 5.41669500  | 1.95583600  | H | -3.82318700 | -4.07532700 | -1.18715400 |
| H | -0.59522900 | 1.47478900  | 3.82120600  | H | -3.73202900 | -0.52331700 | 1.72685600  |
| H | -1.78981300 | 1.10257000  | 2.55175700  | H | -3.24904200 | 0.65767200  | 0.48794400  |
| O | -0.97841000 | 1.06897600  | -1.76610300 | O | 0.12084800  | -0.08167400 | -2.24214000 |
| H | -0.96713500 | 0.49167000  | -2.54987600 | H | 0.93686700  | 0.24360800  | -2.65778400 |
| H | -1.92294700 | 1.24141000  | -1.60562000 | H | -0.60853800 | 0.25069200  | -2.79114400 |

**Table S37** Atomic coordinates (x,y,z) of [Sc(OH)(L<sup>030</sup>)]<sup>2+</sup> isomers.

| [Sc(OH)(L <sup>030</sup> )] <sup>2+</sup> Δ |             |             |             | [Sc(OH)(L <sup>030</sup> )] <sup>2+</sup> Λ |             |             |             |
|---------------------------------------------|-------------|-------------|-------------|---------------------------------------------|-------------|-------------|-------------|
| Sc                                          | 0.00000000  | 0.00000000  | 0.00000000  | Sc                                          | 0.00000000  | 0.00000000  | 0.00000000  |
| N                                           | 1.42631500  | 0.85217400  | 1.80043300  | N                                           | 1.43140600  | -0.83786300 | 1.79700000  |
| C                                           | 1.74909600  | -0.18951000 | 2.82640900  | C                                           | 1.75423300  | 0.20855000  | 2.81845800  |
| C                                           | 1.38189400  | -1.60863200 | 2.39888100  | C                                           | 1.38276200  | 1.62523900  | 2.38737700  |
| N                                           | 0.02213000  | -1.64827100 | 1.81776800  | N                                           | 0.02278100  | 1.65922100  | 1.80567100  |
| C                                           | -1.02270100 | -1.40604300 | 2.86055300  | C                                           | -1.02210200 | 1.41618400  | 2.84912500  |
| C                                           | -2.07596800 | -0.38629300 | 2.44379800  | C                                           | -2.07188800 | 0.39246300  | 2.43330600  |
| N                                           | -1.44411500 | 0.79937300  | 1.82300900  | N                                           | -1.43610400 | -0.79425400 | 1.81710500  |
| C                                           | -0.69303500 | 1.60281900  | 2.83935500  | C                                           | -0.68622400 | -1.59668400 | 2.83643200  |
| C                                           | 0.70627400  | 2.00306300  | 2.38908400  | C                                           | 0.71790200  | -1.98965700 | 2.39301300  |
| H                                           | 1.25447000  | 2.41878300  | 3.25397100  | H                                           | 1.26677600  | -2.39496700 | 3.26222100  |
| H                                           | 0.65540600  | 2.78193900  | 1.61899200  | H                                           | 0.67427700  | -2.77488900 | 1.62922900  |
| H                                           | -0.63968700 | 1.02039100  | 3.76629700  | H                                           | -0.64109100 | -1.01740500 | 3.76564500  |
| H                                           | -1.25657600 | 2.51616300  | 3.08556800  | H                                           | -1.24713600 | -2.51323300 | 3.07656400  |
| C                                           | -2.45302800 | 1.63114600  | 1.14774900  | C                                           | -2.44252100 | -1.62997000 | 1.14220000  |
| C                                           | -1.74733200 | 2.49287300  | 0.12005500  | C                                           | -1.72889000 | -2.50280800 | 0.12948800  |
| O                                           | -0.65157800 | 2.05414100  | -0.34945400 | N                                           | -2.23721700 | -3.65934000 | -0.27390500 |
| N                                           | -2.26144400 | 3.64496600  | -0.28759300 | C                                           | -3.56474700 | -4.14801500 | 0.09836600  |
| C                                           | -1.54695800 | 4.46407900  | -1.26824600 | H                                           | -4.11420400 | -4.40116200 | -0.82022200 |
| H                                           | -0.47056600 | 4.27493900  | -1.20267400 | H                                           | -3.47664400 | -5.05369000 | 0.71712700  |
| H                                           | -1.89753900 | 4.23881500  | -2.28804400 | H                                           | -4.13386100 | -3.38810500 | 0.64055000  |
| H                                           | -1.74907700 | 5.52053000  | -1.04810300 | C                                           | -1.51762000 | -4.46888300 | -1.25921400 |
| C                                           | -3.58241300 | 4.13538000  | 0.10736900  | H                                           | -1.76590400 | -5.52375000 | -1.08542100 |
| H                                           | -4.17948800 | 3.34615300  | 0.57257400  | H                                           | -1.82130600 | -4.19403700 | -2.28198500 |
| H                                           | -3.48624700 | 4.98472200  | 0.80081800  | H                                           | -0.43776300 | -4.32354800 | -1.14954600 |
| H                                           | -4.10889400 | 4.47576300  | -0.79559700 | O                                           | -0.62905800 | -2.06880600 | -0.33482700 |
| H                                           | -3.14903100 | 0.97680400  | 0.59906800  | H                                           | -3.13262000 | -0.97930700 | 0.58175000  |
| H                                           | -3.03572600 | 2.22253000  | 1.86898300  | H                                           | -3.03147100 | -2.21263800 | 1.86508800  |
| H                                           | -2.66938000 | -0.10178400 | 3.33141900  | H                                           | -2.66748900 | 0.10974700  | 3.31990700  |
| H                                           | -2.76238800 | -0.81676600 | 1.70726700  | H                                           | -2.75700700 | 0.81885900  | 1.69302300  |
| H                                           | -0.52280600 | -1.07944200 | 3.77934700  | H                                           | -0.52289300 | 1.09191200  | 3.76882400  |
| H                                           | -1.52767300 | -2.35200500 | 3.10986000  | H                                           | -1.52999500 | 2.36117900  | 3.09656100  |
| C                                           | -0.23284500 | -2.92044900 | 1.12214700  | C                                           | -0.23588700 | 2.92933500  | 1.10839600  |
| C                                           | -1.38619400 | -2.70234600 | 0.15892000  | C                                           | -1.38738100 | 2.70533200  | 0.14442100  |
| O                                           | -1.57933500 | -1.51875700 | -0.25315400 | O                                           | -1.57487000 | 1.52094900  | -0.26814800 |
| N                                           | -2.14974300 | -3.70601600 | -0.25580100 | N                                           | -2.15236700 | 3.70814900  | -0.26972300 |
| C                                           | -3.23234200 | -3.44438200 | -1.20675000 | C                                           | -3.24066500 | 3.44877600  | -1.21422300 |
| H                                           | -3.67251000 | -2.45965300 | -1.01533900 | H                                           | -2.87922900 | 3.52490300  | -2.25228300 |
| H                                           | -2.85667200 | -3.47969600 | -2.24197800 | H                                           | -3.65373300 | 2.44820100  | -1.04711700 |
| H                                           | -3.99846200 | -4.21949100 | -1.07919000 | H                                           | -4.02416000 | 4.20046100  | -1.05420900 |
| C                                           | -1.89478300 | -5.11445600 | 0.04260600  | C                                           | -1.90837700 | 5.11486300  | 0.04739000  |
| H                                           | -1.80714300 | -5.66638700 | -0.90519100 | H                                           | -0.94891100 | 5.25108900  | 0.55364800  |
| H                                           | -0.96522000 | -5.24402600 | 0.60334800  | H                                           | -1.88703700 | 5.68736500  | -0.89150400 |
| H                                           | -2.73223600 | -5.53545100 | 0.61866900  | H                                           | -2.71764000 | 5.50827100  | 0.68095200  |

|   |             |             |             |   |             |             |             |
|---|-------------|-------------|-------------|---|-------------|-------------|-------------|
| H | -0.42164300 | -3.73898800 | 1.83178000  | H | -0.42907800 | 3.74788300  | 1.81678600  |
| H | 0.65024500  | -3.18604500 | 0.51930500  | H | 0.64691000  | 3.19759300  | 0.50620500  |
| H | 1.46248100  | -2.27755000 | 3.27469100  | H | 1.46139300  | 2.29611700  | 3.26194900  |
| H | 2.07716900  | -1.97374500 | 1.63474000  | H | 2.07650100  | 1.99127700  | 1.62247200  |
| H | 1.23524200  | 0.07308400  | 3.75828900  | H | 1.24217400  | -0.05060800 | 3.75192800  |
| H | 2.82545200  | -0.16271100 | 3.05635600  | H | 2.83078700  | 0.18405700  | 3.04752200  |
| C | 2.65201400  | 1.29461300  | 1.11798600  | C | 2.65632800  | -1.27798400 | 1.11169900  |
| C | 3.04459400  | 0.21684500  | 0.12636300  | C | 3.04442700  | -0.19931900 | 0.11931000  |
| O | 2.11399500  | -0.52529200 | -0.31301900 | O | 2.11322400  | 0.54420700  | -0.31525500 |
| N | 4.29744800  | 0.06788900  | -0.28427200 | N | 4.29721100  | -0.05160700 | -0.29249700 |
| C | 5.38832100  | 0.98108700  | 0.05542200  | C | 5.38666900  | -0.96582300 | 0.05002100  |
| H | 5.02938600  | 1.83622100  | 0.63446300  | H | 5.01443900  | -1.85906100 | 0.55917900  |
| H | 6.16135200  | 0.44850400  | 0.62926500  | H | 5.88393900  | -1.28165500 | -0.87872900 |
| H | 5.83739700  | 1.35719700  | -0.87593600 | H | 6.12425800  | -0.45764600 | 0.68940400  |
| C | 4.62216600  | -0.97094500 | -1.26423100 | C | 4.62916500  | 1.00022900  | -1.25551700 |
| H | 4.48104200  | -0.59409700 | -2.28985500 | H | 4.51457300  | 0.63173200  | -2.28744800 |
| H | 5.67374100  | -1.25396100 | -1.12975800 | H | 3.97789500  | 1.86799300  | -1.10562000 |
| H | 3.98458800  | -1.84810500 | -1.10939900 | H | 5.67427300  | 1.29493500  | -1.09629400 |
| H | 3.45261300  | 1.52353800  | 1.83527900  | H | 3.45877500  | -1.50472100 | 1.82804500  |
| H | 2.43557600  | 2.20823700  | 0.54150000  | H | 2.44022600  | -2.19222300 | 0.53613800  |
| O | 0.06882500  | -0.13126800 | -2.00166600 | O | 0.07232000  | 0.10398000  | -2.00198000 |
| H | -0.81649200 | -0.04386900 | -2.39198600 | H | -0.79904600 | -0.06907400 | -2.39528700 |



**Table S38** Atomic coordinates (x,y,z) of [Sc(L<sup>201</sup>)] isomers.

| [Sc(L <sup>201</sup> )] Δ             | [Sc(L <sup>201</sup> )] Δ             |
|---------------------------------------|---------------------------------------|
| Sc 0.00000000 0.00000000 0.00000000   | Sc 0.00000000 0.00000000 0.00000000   |
| N -0.44231500 0.47283900 -2.30601600  | N 0.44670300 0.47693000 -2.30343600   |
| C -1.88196000 0.36824900 -2.69772600  | C 1.88673600 0.37011300 -2.69280300   |
| C -2.82415200 0.24001700 -1.50262000  | C 2.82675300 0.23792500 -1.49635000   |
| N -2.28364900 -0.71910400 -0.51344200 | N 2.28234900 -0.72167300 -0.50983600  |
| C -2.36445700 -2.11394800 -1.03911300 | C 2.36212700 -2.11580800 -1.03769200  |
| C -1.08389300 -2.90752100 -0.85129400 | C 1.08001700 -2.90800300 -0.85358900  |
| N 0.11560300 -2.15727700 -1.29768900  | N -0.11761200 -2.15460700 -1.29977700 |
| C 0.11697300 -1.89285700 -2.76877300  | C -0.11722300 -1.88734600 -2.77047300 |
| C 0.41433600 -0.43571400 -3.09938400  | C -0.41077400 -0.42883500 -3.09899800 |
| H 0.28089100 -0.26948500 -4.18364700  | H -0.27566900 -0.26158700 -4.18291100 |
| H 1.45891600 -0.19648000 -2.85452400  | H -1.45512300 -0.18761100 -2.85510400 |
| H -0.85163800 -2.19348000 -3.18553000 | H 0.85073600 -2.18981400 -3.18741500  |
| H 0.87119400 -2.52321000 -3.26279900  | H -0.87291600 -2.51478200 -3.26595000 |
| C 1.32811000 -2.91233100 -0.91658000  | C -1.33179400 -2.90841300 -0.92101900 |
| C 2.49670500 -1.98546600 -0.76196000  | C -2.49957800 -1.98075300 -0.76546400 |
| C 3.81280300 -2.30013000 -1.10609600  | C -3.81624900 -2.29507500 -1.10768500 |
| C 4.82003600 -1.37340600 -0.83032100  | C -4.82302400 -1.36847800 -0.82981800 |
| C 4.49357000 -0.16954800 -0.19950500  | C -4.49546300 -0.16486900 -0.19921800 |
| C 3.15858800 0.06702900 0.11088700    | C -3.15996600 0.07139000 0.10913600   |
| N 2.18778900 -0.81435600 -0.18543300  | C -2.66478900 1.29617600 0.83842900   |
| C 2.66446800 1.29243800 0.84007800    | O -3.45506000 2.19444400 1.15866900   |
| O 3.45586500 2.18979500 1.16015900    | O -1.39474000 1.28065100 1.08157100   |
| O 1.39463200 1.27758100 1.08503600    | N -2.18966400 -0.80997500 -0.18877200 |
| H 5.24701700 0.57524800 0.05306800    | H -5.24842500 0.57985500 0.05504400   |
| H 5.85477100 -1.59136600 -1.09962000  | H -5.85821300 -1.58640200 -1.09738300 |
| H 4.03564800 -3.25450500 -1.58361400  | H -4.04005100 -3.24935200 -1.58494700 |
| H 1.14868900 -3.37533700 0.06655800   | H -1.15380500 -3.37318900 0.06154800  |
| H 1.54545800 -3.72278300 -1.62981200  | H -1.54955000 -3.71748400 -1.63567800 |
| H -1.17582300 -3.86736600 -1.39229200 | H 1.17103800 -3.86666300 -1.39677800  |
| H -0.93455800 -3.13850900 0.21168900  | H 0.92869700 -3.14129900 0.20859500   |
| H -2.62955000 -2.07132900 -2.10191700 | H 2.62909800 -2.07174900 -2.09993900  |
| H -3.18422000 -2.65475100 -0.54099500 | H 3.18034800 -2.65855800 -0.53913600  |
| C -2.95733700 -0.60594100 0.79180400  | C 2.95249800 -0.61141900 0.79753600   |
| C -2.04611400 -1.07862300 1.92031400  | C 2.03768500 -1.08500000 1.92296200   |
| O -2.50282100 -1.58650700 2.94528200  | O 2.49147200 -1.59247600 2.94932800   |
| O -0.77426200 -0.84071100 1.72422300  | O 0.76597700 -0.84730300 1.72344900   |
| H -3.91559300 -1.14859600 0.81894900  | H 3.91006300 -1.15519000 0.82655900   |
| H -3.15927600 0.45859300 0.99128200   | H 3.15494500 0.45259300 0.99923400    |
| H -3.82013100 -0.07743000 -1.86093200 | H 3.82250900 -0.08126300 -1.85368600  |
| H -2.93952300 1.20410900 -0.99859400  | H 2.94369100 1.20093300 -0.99062500   |
| H -1.99680100 -0.49220800 -3.36627200 | H 2.00105800 -0.48940000 -3.36265600  |
| H -2.17221400 1.25260900 -3.28567100  | H 2.17971500 1.25490300 -3.27878900   |

|   |             |            |             |   |             |            |             |
|---|-------------|------------|-------------|---|-------------|------------|-------------|
| C | 0.00953100  | 1.87301300 | -2.38593100 | C | -0.00258200 | 1.87811000 | -2.38092700 |
| C | -0.58730200 | 2.66396900 | -1.22292600 | C | 0.59510000  | 2.66589900 | -1.21610400 |
| O | -0.75314900 | 3.88646900 | -1.30578900 | O | 0.76533400  | 3.88799000 | -1.29739000 |
| O | -0.85330100 | 1.94705900 | -0.17450900 | O | 0.85714900  | 1.94688900 | -0.16824100 |
| H | -0.23824500 | 2.34328400 | -3.35115500 | H | 0.24674700  | 2.34958500 | -3.34518700 |
| H | 1.10500400  | 1.89844800 | -2.25904400 | H | -1.09808100 | 1.90523700 | -2.25464600 |

**Table S39** Atomic coordinates (x,y,z) of ScF(L<sup>201</sup>)<sup>-</sup> isomers.

| [ScF(L <sup>201</sup> ) <sup>-</sup> Δ | ScF(L <sup>201</sup> ) <sup>-</sup> Λ |
|----------------------------------------|---------------------------------------|
| Sc 0.00000000 0.00000000 0.00000000    | Sc 0.00000000 0.00000000 0.00000000   |
| N 0.55952200 0.93090000 2.27008800     | N -0.55950000 0.93092600 2.27007800   |
| C 1.94412500 0.77885100 2.78564100     | C -1.94410200 0.77888600 2.78563900   |
| C 2.93714800 0.48152200 1.67130000     | C -2.93713000 0.48156800 1.67130300   |
| N 2.42506100 -0.63555900 0.86923100    | N -2.42504900 -0.63551100 0.86922600  |
| C 2.45319600 -1.88977700 1.66074700    | C -2.45319900 -1.88973800 1.66073900  |
| C 1.17401300 -2.70327000 1.56499900    | C -1.17402200 -2.70323900 1.56499700  |
| N -0.06113600 -1.88709500 1.66090700   | N 0.06113300 -1.88707200 1.66089600   |
| C -0.25112100 -1.30723800 3.03443400   | C 0.25112800 -1.30721500 3.03442600   |
| C -0.43623700 0.21823600 3.09184800    | C 0.43625800 0.21825900 3.09184000    |
| H -0.39329000 0.52386100 4.15522600    | H 0.39331300 0.52388800 4.15521600    |
| H -1.42736600 0.49478300 2.70807400    | H 1.42738500 0.49480000 2.70806100    |
| H 0.60692400 -1.60192200 3.65293000    | H -0.60692000 -1.60189300 3.65292000  |
| H -1.13530800 -1.76256000 3.50595000   | H 1.13531100 -1.76254700 3.50593900   |
| C -1.18110000 -2.78505200 1.30531500   | C 1.18109200 -2.78503700 1.30530600   |
| C -2.42778400 -2.00632400 1.02265900   | C 2.42778000 -2.00631600 1.02264800   |
| C -3.71645700 -2.51978800 1.20011900   | C 3.71645200 -2.51978300 1.20009900   |
| C -4.80810300 -1.71844200 0.86997500   | H 3.84934800 -3.52816100 1.59332700   |
| C -4.58335800 -0.41734200 0.41116600   | C 4.80809800 -1.71843400 0.86995900   |
| C -3.26984700 0.02673300 0.29379600    | C 4.58335500 -0.41733300 0.41115700   |
| N -2.21810300 -0.76799900 0.56088300   | C 3.26984200 0.02674400 0.29379000    |
| C -2.90895000 1.44999400 -0.05885400   | C 2.90894100 1.44999500 -0.05887500   |
| O -3.80209100 2.21585900 -0.48246200   | O 3.80208700 2.21586400 -0.48247700   |
| O -1.68845400 1.74789900 0.14901400    | O 1.68844400 1.74790000 0.14898600    |
| H -5.40091300 0.26067200 0.17006600    | N 2.21810100 -0.76798600 0.56088000   |
| H -5.82531000 -2.09509700 0.99047500   | H 5.40091300 0.26067800 0.17005700    |
| H -3.84935100 -3.52816200 1.59335800   | H 5.82530400 -2.09509400 0.99045400   |
| H -0.89925900 -3.32615600 0.38858600   | H 0.89924700 -3.32614400 0.38857900   |
| H -1.36031800 -3.54062900 2.08987800   | H 1.36030900 -3.54061300 2.08987000   |
| H 1.18486800 -3.47689700 2.35573000    | H -1.18488200 -3.47686000 2.35573400  |
| H 1.13246300 -3.22184300 0.60159000    | H -1.13248000 -3.22182000 0.60159300  |
| H 2.65757900 -1.64356200 2.70862800    | H -2.65759200 -1.64352800 2.70861900  |
| H 3.29088500 -2.52920600 1.33334300    | H -3.29088800 -2.52916000 1.33332200  |
| C 3.11631000 -0.80178000 -0.40762200   | C -3.11631400 -0.80172800 -0.40762100 |
| C 2.26383100 -1.65929300 -1.34124500   | C -2.26386100 -1.65928700 -1.34122300 |
| O 2.80168900 -2.36865500 -2.20786200   | O -2.80174200 -2.36866000 -2.20782000 |
| O 0.98942000 -1.55393500 -1.16602700   | O -0.98944600 -1.55392500 -1.16604000 |
| H 4.12209300 -1.24620900 -0.29937300   | H -4.12211300 -1.24611200 -0.29935700 |
| H 3.22675900 0.18654000 -0.88259900    | H -3.22672600 0.18659000 -0.88261300  |
| H 3.92680400 0.25388500 2.11314100     | H -3.92678500 0.25393000 2.11314600   |
| H 3.05900100 1.34900900 1.01316600     | H -3.05898500 1.34905700 1.01317300   |
| H 1.96040200 -0.02457200 3.53021600    | H -1.96038200 -0.02453900 3.53021100  |
| H 2.25087700 1.69282500 3.31903700     | H -2.25084100 1.69286100 3.31904100   |

|   |             |            |             |   |             |            |             |
|---|-------------|------------|-------------|---|-------------|------------|-------------|
| C | 0.29053000  | 2.35757900 | 2.05237800  | C | -0.29050800 | 2.35760000 | 2.05235200  |
| C | 0.85672900  | 2.80012200 | 0.69743600  | C | -0.85670700 | 2.80012800 | 0.69740800  |
| O | 1.11108900  | 3.99697800 | 0.49779400  | O | -1.11105500 | 3.99698300 | 0.49774700  |
| O | 1.01180400  | 1.86396600 | -0.18908300 | O | -1.01180300 | 1.86395700 | -0.18909500 |
| H | 0.71202600  | 2.99023300 | 2.85100500  | H | -0.71199700 | 2.99026400 | 2.85097700  |
| H | -0.79125600 | 2.52759400 | 2.00877200  | H | 0.79127800  | 2.52761900 | 2.00874500  |
| F | -0.76589800 | 0.21803500 | -1.78890100 | F | 0.76592100  | 0.21800400 | -1.78890000 |

**Table S40** Atomic coordinates (x,y,z) of [Sc(OH<sub>2</sub>)(L<sup>201</sup>)] isomers.

| [Sc(OH <sub>2</sub> )(L <sup>201</sup> )] Δ | [Sc(OH <sub>2</sub> )(L <sup>201</sup> )] Δ |
|---------------------------------------------|---------------------------------------------|
| Sc 0.00000000 0.00000000 0.00000000         | Sc 0.00000000 0.00000000 0.00000000         |
| N -0.38761600 0.80714300 -2.25036900        | N 0.38761200 0.80714300 -2.25037600         |
| C -1.76491100 0.70929600 -2.81452900        | C 1.76490500 0.70930300 -2.81453800         |
| C -2.81581600 0.49202200 -1.73599300        | C 2.81581200 0.49203100 -1.73600300         |
| N -2.36504000 -0.59074000 -0.84861400       | N 2.36504100 -0.59073100 -0.84862400        |
| C -2.41366900 -1.89281400 -1.56303400       | C 2.41367100 -1.89280700 -1.56304200        |
| C -1.16852100 -2.73683100 -1.36262100       | C 1.16852500 -2.73682600 -1.36262400        |
| N 0.08842800 -1.95731600 -1.49062700        | N -0.08842400 -1.95731300 -1.49063000       |
| C 0.33006600 -1.48667900 -2.89877700        | C -0.33006300 -1.48668000 -2.89878200       |
| C 0.58828900 0.02059500 -3.03366300         | C -0.58829000 0.02059200 -3.03367000        |
| H 0.55879600 0.28486700 -4.10683100         | H -0.55879700 0.28486300 -4.10683900        |
| H 1.58823300 0.27432400 -2.65860600         | H -1.58823500 0.27432000 -2.65861600        |
| H -0.52985800 -1.77940200 -3.51378900       | H 0.52986400 -1.77940000 -3.51379100        |
| H 1.19856200 -2.01426700 -3.32010700        | H -1.19855600 -2.01427300 -3.32011200       |
| C 1.18734600 -2.84382100 -1.04291000        | C -1.18734100 -2.84381900 -1.04290900       |
| C 2.43895300 -2.05017100 -0.83859200        | C -2.43894800 -2.05016800 -0.83859500       |
| C 3.72811400 -2.54941300 -1.04001000        | C -3.72810900 -2.54941100 -1.04001500       |
| C 4.81721300 -1.71257400 -0.79715200        | H -3.86481800 -3.57401600 -1.38663600       |
| C 4.58805600 -0.39763800 -0.38398300        | C -4.81720800 -1.71257100 -0.79716000       |
| C 3.27254200 0.02329200 -0.21825300         | C -4.58805200 -0.39763500 -0.38399100       |
| N 2.22576200 -0.79479400 -0.42319600        | C -3.27253900 0.02329500 -0.21825900        |
| C 2.89668400 1.42955000 0.17153200          | C -2.89668300 1.42955200 0.17153100         |
| O 3.79035700 2.26548200 0.40012700          | O -3.79035700 2.26548500 0.40011800         |
| O 1.63420800 1.64160300 0.22359200          | O -1.63420800 1.64160400 0.22360500         |
| H 5.40156100 0.30302800 -0.20139900         | N -2.22575900 -0.79479000 -0.42320100       |
| H 5.83530300 -2.07674700 -0.94408000        | H -5.40155900 0.30303000 -0.20140900        |
| H 3.86482300 -3.57401800 -1.38663200        | H -5.83529800 -2.07674400 -0.94409000       |
| H 0.89286100 -3.28510800 -0.07799900        | H -0.89285600 -3.28510000 -0.07799600       |
| H 1.35159000 -3.67204100 -1.75220100        | H -1.35158300 -3.67204200 -1.75219700       |
| H -1.17850100 -3.57105100 -2.08767400       | H 1.17850400 -3.57104700 -2.08767700        |
| H -1.16508900 -3.17402500 -0.35784800       | H 1.16509500 -3.17401900 -0.35785100        |
| H -2.56482100 -1.70334800 -2.63169300       | H 2.56481900 -1.70334200 -2.63170200        |
| H -3.28786700 -2.47718300 -1.23139800       | H 3.28787100 -2.47717400 -1.23140700        |
| C -3.10730700 -0.64804500 0.41204500        | C 3.10731000 -0.64803300 0.41203500         |
| C -2.29729300 -1.41368500 1.45261900        | C 2.29730000 -1.41367100 1.45261300         |
| O -2.85493600 -2.02072500 2.37463600        | O 2.85494800 -2.02070300 2.37463300         |
| O -1.00908300 -1.33869800 1.30144200        | O 1.00909100 -1.33869500 1.30143400         |
| H -4.10823900 -1.09925700 0.30101700        | H 4.10824200 -1.09924400 0.30100600         |
| H -3.23239800 0.37692000 0.79587500         | H 3.23240100 0.37693300 0.79586200          |
| H -3.78477700 0.25285200 -2.21310000        | H 3.78477400 0.25286300 -2.21311200         |
| H -2.95502100 1.39476400 -1.13274800        | H 2.95501600 1.39477400 -1.13276000         |
| H -1.79083900 -0.11448700 -3.53582900       | H 1.79083600 -0.11447900 -3.53584000        |
| H -2.00009100 1.62190600 -3.38364800        | H 2.00008100 1.62191500 -3.38365500         |

|   |             |             |             |   |             |             |             |
|---|-------------|-------------|-------------|---|-------------|-------------|-------------|
| C | -0.03941000 | 2.22777700  | -2.07846000 | C | 0.03940300  | 2.22777600  | -2.07846700 |
| C | -0.68757900 | 2.76501400  | -0.79572400 | C | 0.68757400  | 2.76501300  | -0.79573200 |
| O | -0.88306700 | 3.97805400  | -0.65645000 | O | 0.88306000  | 3.97805300  | -0.65645700 |
| O | -0.97473000 | 1.86694000  | 0.10182700  | O | 0.97472700  | 1.86693900  | 0.10181900  |
| H | -0.34544000 | 2.84014800  | -2.94175000 | H | 0.34543000  | 2.84014800  | -2.94175800 |
| H | 1.04635200  | 2.32599900  | -1.95019400 | H | -1.04635800 | 2.32599500  | -1.95019900 |
| O | 0.86540400  | 0.12504300  | 2.18529100  | O | -0.86540600 | 0.12502700  | 2.18528700  |
| H | 1.08180900  | 1.05931100  | 2.34560300  | H | -1.08182700 | 1.05929200  | 2.34560100  |
| H | 0.11883800  | -0.08382600 | 2.77171800  | H | -0.11884400 | -0.08383300 | 2.77172200  |

**Table S41** Atomic coordinates (x,y,z) of [Sc(OH)(L<sup>201</sup>)]<sup>-</sup> isomers.

| [Sc(OH)(L <sup>201</sup> )] <sup>-</sup> Δ | [Sc(OH)(L <sup>201</sup> )] <sup>-</sup> Λ |
|--------------------------------------------|--------------------------------------------|
| Sc 0.00000000 0.00000000 0.00000000        | Sc 0.00000000 0.00000000 0.00000000        |
| N 0.04717500 -1.89760800 -1.64816800       | N -0.04813700 -1.89696700 -1.64826900      |
| C -1.23784500 -2.63245200 -1.59617700      | C 1.23656900 -2.63241200 -1.59701600       |
| C -2.44158000 -1.72407000 -1.78143300      | C 2.44069600 -1.72445300 -1.78185600       |
| N -2.35833000 -0.46365100 -1.00134700      | N 2.35812600 -0.46421700 -1.00134000       |
| C -2.73674400 0.68373900 -1.83782400       | C 2.73725100 0.68311900 -1.83761300        |
| C -1.67054700 0.90411500 -2.90438700       | C 1.67121500 0.90415700 -2.90430700        |
| N -0.29565400 0.92576500 -2.33992900       | N 0.29644700 0.92656300 -2.33991600        |
| C 0.65555900 0.11167500 -3.11676700        | C -0.65555900 0.11308800 -3.11639400       |
| C 0.33902600 -1.38755300 -3.02881000       | C -0.34015300 -1.38642300 -3.02875600      |
| H -0.51858400 -1.62537400 -3.67108000      | H 0.51704700 -1.62474600 -3.67139500       |
| H 1.19493700 -1.93465100 -3.45355000       | H -1.19666900 -1.93275400 -3.45326000      |
| H 0.66644700 0.39632300 -4.18693000        | H -0.66675100 0.39771600 -4.18656700       |
| H 1.65599600 0.31264200 -2.71274000        | H -1.65569900 0.31469900 -2.71194600       |
| C 0.12333500 2.31755800 -2.13510300        | C -0.12166100 2.31835100 -2.13398400       |
| C -0.49833000 2.86458900 -0.84628000       | C 0.50064700 2.86437300 -0.84498900        |
| O -0.65700900 4.08645600 -0.70415100       | O 0.66040300 4.08610500 -0.70251200        |
| O -0.80012100 1.98070100 0.05361500        | O 0.80178000 1.97998000 0.05449100         |
| H -0.14245900 2.96868700 -2.98491600       | H 0.14425000 2.96992700 -2.98343800        |
| H 1.21057900 2.35212300 -1.99076400        | H -1.20885000 2.35340100 -1.98935300       |
| H -1.73150900 0.11657000 -3.66408600       | H 1.73174300 0.11658400 -3.66400700        |
| H -1.87606200 1.84983800 -3.43151700       | H 1.87734900 1.84979700 -3.43138000        |
| H -3.71629300 0.52713800 -2.32973100       | H 3.71672600 0.52599900 -2.32947900        |
| H -2.82738000 1.56145700 -1.18859500       | H 2.82833500 1.56076400 -1.18834900        |
| C -3.13542600 -0.55923300 0.23435100       | C 3.13500900 -0.56046100 0.23446000        |
| C -2.40979400 -1.46472500 1.22868400       | C 2.40919700 -1.46573500 1.22895000        |
| O -3.04814700 -2.10985700 2.07519800       | O 3.04754800 -2.10975400 2.07631400        |
| O -1.12134000 -1.46619800 1.12284700       | O 1.12074500 -1.46838100 1.12230500        |
| H -4.16412900 -0.92592500 0.06918200       | H 4.16356600 -0.92760400 0.06925700        |
| H -3.19681300 0.44144800 0.69224700        | H 3.19701000 0.44012000 0.69251000         |
| H -2.55397500 -1.47538200 -2.84259700      | H 2.55320900 -1.47551200 -2.84295900       |
| H -3.34978200 -2.28539500 -1.50377000      | H 3.34857300 -2.28636500 -1.50435300       |
| H -1.26291800 -3.42232000 -2.37034300      | H 1.26108200 -3.42171400 -2.37177400       |
| H -1.28229900 -3.12845800 -0.62108400      | H 1.28096800 -3.12912200 -0.62228300       |
| C 1.09820200 -2.82657700 -1.18956000       | C -1.09923600 -2.82573500 -1.18934900      |
| C 2.38888200 -2.10112600 -0.96199700       | C -2.38969600 -2.10002800 -0.96155100      |
| C 3.63301800 -2.69542400 -1.18992400       | C -3.63411700 -2.69382000 -1.18935600      |
| C 4.78691500 -1.95524500 -0.94203100       | H -3.68345900 -3.71700900 -1.56304500      |
| C 4.65776100 -0.63636900 -0.50542700       | C -4.78763200 -1.95315000 -0.94119700      |
| C 3.38083700 -0.10887200 -0.32119600       | C -4.65784900 -0.63426900 -0.50478100      |
| N 2.26571500 -0.83997400 -0.51807400       | C -3.38070300 -0.10733500 -0.32083900      |
| C 3.18419000 1.34350300 0.06268800         | C -3.18298700 1.34485400 0.06284500        |
| O 4.19973700 2.02519200 0.33194100         | O -4.19804200 2.02762600 0.33115800        |

|   |            |             |             |   |             |             |             |
|---|------------|-------------|-------------|---|-------------|-------------|-------------|
| O | 1.97917400 | 1.75110500  | 0.06048900  | O | -1.97752500 | 1.75104500  | 0.06160000  |
| H | 5.52259100 | -0.00081600 | -0.32328400 | N | -2.26593900 | -0.83901000 | -0.51761100 |
| H | 5.77292700 | -2.39284500 | -1.10748800 | H | -5.52242300 | 0.00161100  | -0.32247600 |
| H | 3.68188800 | -3.71861400 | -1.56367700 | H | -5.77389000 | -2.39029700 | -1.10636600 |
| H | 0.76674200 | -3.26213400 | -0.23365800 | H | -0.76757400 | -3.26110800 | -0.23344400 |
| H | 1.24308300 | -3.65913400 | -1.90001800 | H | -1.24438600 | -3.65837300 | -1.89964300 |
| O | 0.66107500 | 0.25093900  | 1.89693000  | O | -0.66050600 | 0.25067100  | 1.89730600  |
| H | 1.30477800 | 0.97529900  | 1.82435200  | H | -1.30291200 | 0.97613500  | 1.82446200  |



**Table S42** Atomic coordinates (x,y,z) of [Sc(L<sup>111</sup>)]<sup>+</sup> isomers.

| [Sc(L <sup>111</sup> )] <sup>+</sup> ΔM | [Sc(L <sup>111</sup> )] <sup>+</sup> ΔM |
|-----------------------------------------|-----------------------------------------|
| Sc 0.00000000 0.00000000 0.00000000     | Sc 0.00000000 0.00000000 0.00000000     |
| N -0.54482300 1.93611200 1.23026100     | N 0.74262100 0.39588700 -2.23132100     |
| C 0.63048100 2.66442300 1.80457700      | C 1.70648500 -0.62469400 -2.75860900    |
| C 1.96900800 2.18129800 1.25328400      | C 2.25191700 -1.55996400 -1.68058200    |
| N 2.00477600 0.69863400 1.18883700      | N 1.16140700 -1.99777500 -0.78168100    |
| C 2.10834100 0.12065200 2.56708800      | C 0.26684700 -2.96616700 -1.48290600    |
| C 1.12720500 -1.00784000 2.83050200     | C -1.20857500 -2.66994000 -1.28342700   |
| N -0.25076800 -0.67346000 2.39569800    | N -1.51744600 -1.23450400 -1.49781500   |
| C -0.85833700 0.44842200 3.17845200     | C -1.30831200 -0.81253200 -2.92116900   |
| C -1.49196400 1.51078300 2.28626300     | C -0.48891400 0.46677500 -3.05237400    |
| H -1.81092400 2.36759900 2.90597100     | H -0.25007900 0.63679500 -4.11713400    |
| H -2.38555800 1.11403400 1.78511200     | H -1.06580400 1.33288200 -2.70109000    |
| H -0.08730100 0.89548600 3.81662600     | H -0.82830800 -1.63402900 -3.46510100   |
| H -1.62962100 0.05734800 3.85820500     | H -2.28051800 -0.65008800 -3.40949600   |
| C -1.09854200 -1.88012100 2.50448600    | C -2.92131100 -0.98025200 -1.10013000   |
| C -2.26941100 -1.77183200 1.57531600    | C -3.11184200 0.48331400 -0.83697100    |
| C -3.54923000 -2.26063400 1.84218800    | C -4.25965000 1.21845900 -1.13677900    |
| C -4.52798100 -2.15774400 0.85165600    | C -4.30220800 2.56923200 -0.78371200    |
| C -4.20030300 -1.59243000 -0.38399700   | C -3.21110900 3.14780200 -0.12806700    |
| C -2.90019000 -1.13550600 -0.57185900   | C -2.10924300 2.34373000 0.14221700     |
| N -1.97049000 -1.20653400 0.39622800    | C -0.88304800 2.79739600 0.89511200     |
| C -2.38040400 -0.57381700 -1.87233400   | O -0.75205100 3.98134500 1.22862200     |
| O -3.14567200 -0.40775200 -2.83145100   | O -0.04359400 1.84167600 1.14429600     |
| O -1.11097800 -0.32437400 -1.86234700   | N -2.06455300 1.05188100 -0.22300900    |
| H -4.92438300 -1.50907900 -1.19334600   | H -3.20665200 4.19339300 0.17687500     |
| H -5.53875100 -2.52336500 1.03957500    | H -5.18464400 3.16754200 -1.01595000    |
| H -3.76750800 -2.71089600 2.81072300    | H -5.09792500 0.73699800 -1.64037700    |
| H -0.50230500 -2.74832100 2.18315100    | H -3.11198500 -1.51930400 -0.15902000   |
| H -1.41742300 -2.06126600 3.54286800    | H -3.63083800 -1.35635100 -1.85358400   |
| H 1.15524000 -1.26076800 3.90603000     | H -1.80076800 -3.30658600 -1.96520700   |
| H 1.42388400 -1.90474700 2.26989700     | H -1.51305400 -2.91006000 -0.25671100   |
| H 1.96350600 0.92747800 3.29441900      | H 0.51397200 -2.95968200 -2.55027900    |
| H 3.12695900 -0.26055500 2.73568700     | H 0.47064100 -3.98888700 -1.12962700    |
| C 3.12051600 0.23745200 0.34085700      | C 1.66383400 -2.56780800 0.48006600     |
| C 2.78199300 -1.11999700 -0.24334100    | C 0.60805300 -2.45778100 1.57768300     |
| O 1.54796200 -1.37978400 -0.44352700    | O 0.55873100 -3.26396800 2.50499600     |
| N 3.72290700 -1.99027800 -0.56946700    | O -0.18611300 -1.41823900 1.46590800    |
| C 3.36379500 -3.29974900 -1.11972000    | H 1.99761500 -3.61188800 0.37062200     |
| H 2.34768800 -3.56950000 -0.81589000    | H 2.52175100 -1.96545300 0.81938800     |
| H 3.42838200 -3.28264100 -2.21890100    | H 2.73729700 -2.42414700 -2.16816700    |
| H 4.07377600 -4.04267100 -0.73268500    | H 3.00508200 -1.05328300 -1.07056500    |
| C 5.15961500 -1.71629100 -0.47543200    | H 1.19854600 -1.20128400 -3.53960900    |
| H 5.64464000 -2.14339000 -1.36350800    | H 2.54882100 -0.11740300 -3.25269600    |

|   |             |             |             |   |            |            |             |
|---|-------------|-------------|-------------|---|------------|------------|-------------|
| H | 5.36373400  | -0.64190900 | -0.46025300 | C | 1.39589600 | 1.71549700 | -2.12996100 |
| H | 5.58375900  | -2.19111200 | 0.42224600  | C | 2.33578200 | 1.66808100 | -0.93768500 |
| H | 4.06821300  | 0.23504200  | 0.89530400  | O | 2.07929900 | 0.80671000 | -0.04384400 |
| H | 3.22713300  | 0.92208000  | -0.51520400 | N | 3.36063200 | 2.50363500 | -0.82782800 |
| H | 2.78287900  | 2.56683500  | 1.89222000  | C | 3.62857200 | 3.60094900 | -1.75719400 |
| H | 2.12772600  | 2.56069300  | 0.24011700  | H | 2.79992300 | 3.74542400 | -2.45620200 |
| H | 0.60566400  | 2.55417600  | 2.89392400  | H | 3.75544700 | 4.52669700 | -1.17724400 |
| H | 0.53238500  | 3.74192000  | 1.60274500  | H | 4.55492300 | 3.40727600 | -2.31905800 |
| C | -1.18798300 | 2.74892600  | 0.17834800  | C | 4.23501900 | 2.43544100 | 0.34456300  |
| C | -0.28830100 | 2.75352400  | -1.05902800 | H | 3.87428700 | 3.11259900 | 1.13515700  |
| O | -0.32882700 | 3.67651300  | -1.87784400 | H | 4.26736100 | 1.41117800 | 0.73027900  |
| O | 0.46513100  | 1.69799300  | -1.16691800 | H | 5.24389100 | 2.74545600 | 0.04262500  |
| H | -1.40809600 | 3.77453900  | 0.51407300  | H | 1.90430600 | 1.98241100 | -3.06738700 |
| H | -2.13614700 | 2.26495000  | -0.11118200 | H | 0.63151100 | 2.48117800 | -1.91890000 |

**Table S43** Atomic coordinates (x,y,z) of [ScF(L<sup>111</sup>)] isomers.

| [ScF(L <sup>111</sup> )] ΔM |             |             |             | [ScF(L <sup>111</sup> )] ΔM |             |             |             |
|-----------------------------|-------------|-------------|-------------|-----------------------------|-------------|-------------|-------------|
| Sc                          | 0.00000000  | 0.00000000  | 0.00000000  | Sc                          | 0.00000000  | 0.00000000  | 0.00000000  |
| N                           | -0.35178800 | 1.73733300  | 1.75131700  | N                           | -0.85863200 | 0.03353100  | 2.32283200  |
| C                           | 0.82110900  | 2.24946000  | 2.50790500  | C                           | -0.91002900 | -1.34745200 | 2.91572300  |
| C                           | 2.13503400  | 1.96969200  | 1.79521700  | C                           | -0.58219600 | -2.47488500 | 1.92922600  |
| N                           | 2.18590800  | 0.54740200  | 1.42785400  | N                           | 0.61087200  | -2.11502900 | 1.14414000  |
| C                           | 2.30496700  | -0.29320900 | 2.64738000  | C                           | 1.81998400  | -2.17164700 | 2.01307700  |
| C                           | 1.34478600  | -1.47017000 | 2.68000800  | C                           | 2.75778400  | -0.98961100 | 1.84110500  |
| N                           | -0.03015400 | -1.13585500 | 2.23367000  | N                           | 2.00548000  | 0.27389500  | 1.80677300  |
| C                           | -0.74452200 | -0.24521300 | 3.21311100  | C                           | 1.44693900  | 0.60293800  | 3.14437200  |
| C                           | -1.32350500 | 1.04999900  | 2.62221200  | C                           | -0.03415500 | 0.96590700  | 3.12900000  |
| H                           | -1.65186200 | 1.69056200  | 3.46302600  | H                           | -0.39715100 | 1.00589900  | 4.17294700  |
| H                           | -2.20790600 | 0.82947900  | 2.01055900  | H                           | -0.17532800 | 1.96427700  | 2.69628700  |
| H                           | -0.05043100 | -0.00600400 | 4.02915500  | H                           | 1.61481500  | -0.24894900 | 3.81498400  |
| H                           | -1.57601400 | -0.79808100 | 3.67588800  | H                           | 1.99420500  | 1.44904100  | 3.59208900  |
| C                           | -0.74140500 | -2.42538800 | 2.08123800  | C                           | 2.87089800  | 1.34560500  | 1.29967400  |
| C                           | -2.02750300 | -2.23543700 | 1.34027800  | C                           | 2.04759900  | 2.54541400  | 0.93842300  |
| C                           | -3.15636500 | -3.04031800 | 1.51894100  | C                           | 2.46463200  | 3.85803500  | 1.17502800  |
| C                           | -4.29227000 | -2.78081200 | 0.75305500  | C                           | 1.62468200  | 4.91202100  | 0.81711700  |
| C                           | -4.28043400 | -1.70711000 | -0.14176900 | C                           | 0.38252400  | 4.62335400  | 0.25011700  |
| C                           | -3.12294200 | -0.94160700 | -0.24102700 | C                           | 0.04196600  | 3.28881100  | 0.04831100  |
| N                           | -2.01440400 | -1.22284700 | 0.46514400  | C                           | -1.28685200 | 2.86802200  | -0.52399600 |
| C                           | -3.01752600 | 0.30211500  | -1.08705000 | O                           | -2.13641900 | 3.73016500  | -0.81007800 |
| O                           | -3.95270400 | 0.59970800  | -1.85817100 | O                           | -1.42846200 | 1.60018700  | -0.65929300 |
| O                           | -1.94465900 | 0.96932200  | -0.90420900 | N                           | 0.86176100  | 2.27248000  | 0.37025100  |
| H                           | -5.15073900 | -1.44368800 | -0.74121000 | H                           | -0.32366400 | 5.40397300  | -0.02867700 |
| H                           | -5.18639800 | -3.39585500 | 0.86792400  | H                           | 1.92808200  | 5.94526800  | 0.99356400  |
| H                           | -3.13626800 | -3.84812500 | 2.25116000  | H                           | 3.43199300  | 4.03910300  | 1.64437300  |
| H                           | -0.09763800 | -3.09697400 | 1.49195300  | H                           | 3.36676500  | 0.97682500  | 0.38859600  |
| H                           | -0.91716500 | -2.90885600 | 3.05749200  | H                           | 3.65994000  | 1.62320400  | 2.02173600  |
| H                           | 1.32515900  | -1.88284500 | 3.70578200  | H                           | 3.49365600  | -0.99680200 | 2.66848700  |
| H                           | 1.70457400  | -2.26330500 | 2.01641000  | H                           | 3.31617300  | -1.07033900 | 0.90429200  |
| H                           | 2.14778600  | 0.33908600  | 3.52821400  | H                           | 1.48924900  | -2.23120900 | 3.05583100  |
| H                           | 3.33086500  | -0.68713300 | 2.74089600  | H                           | 2.37363800  | -3.10435500 | 1.81635600  |
| C                           | 3.26373400  | 0.26121300  | 0.48183000  | C                           | 0.82820900  | -2.91140000 | -0.07138300 |
| C                           | 2.95723800  | -1.06947000 | -0.17898500 | C                           | 1.77494800  | -2.15076700 | -1.01477500 |
| O                           | 1.74960300  | -1.42487500 | -0.24309400 | O                           | 2.43324100  | -2.77495900 | -1.86131000 |
| N                           | 3.93280200  | -1.83140100 | -0.67437300 | O                           | 1.80055000  | -0.86718200 | -0.85708300 |
| C                           | 3.61331200  | -3.12567600 | -1.27513600 | H                           | 1.23645200  | -3.91376600 | 0.14370300  |
| H                           | 2.71030700  | -3.54077200 | -0.81481800 | H                           | -0.13068800 | -3.03705400 | -0.59693300 |
| H                           | 3.45331800  | -3.02530300 | -2.36112900 | H                           | -0.42596100 | -3.40839100 | 2.50171800  |
| H                           | 4.45722300  | -3.80727700 | -1.10359000 | H                           | -1.41106900 | -2.63689400 | 1.23456500  |
| C                           | 5.33047300  | -1.41411700 | -0.76884400 | H                           | -0.21621800 | -1.38132900 | 3.76408900  |
| H                           | 5.69476700  | -1.64131600 | -1.78131200 | H                           | -1.91062700 | -1.53095200 | 3.33610200  |

|   |             |             |             |   |             |             |             |
|---|-------------|-------------|-------------|---|-------------|-------------|-------------|
| H | 5.43950400  | -0.33837100 | -0.60354000 | C | -2.22322100 | 0.57739300  | 2.22242200  |
| H | 5.95086000  | -1.96255200 | -0.04267800 | C | -2.93522300 | -0.15016000 | 1.10117100  |
| H | 4.25127800  | 0.26576800  | 0.96987800  | O | -2.22832200 | -0.78578300 | 0.27920700  |
| H | 3.26734500  | 1.03114100  | -0.30629700 | N | -4.26591600 | -0.09694800 | 1.00517200  |
| H | 2.97619600  | 2.25243700  | 2.45675300  | C | -5.11396700 | 0.71742300  | 1.87152200  |
| H | 2.21983400  | 2.56316800  | 0.87861200  | H | -4.52440500 | 1.42396700  | 2.46302000  |
| H | 0.82808100  | 1.79533700  | 3.50450600  | H | -5.80836400 | 1.29564400  | 1.24400800  |
| H | 0.71880600  | 3.33410000  | 2.67051400  | H | -5.70438300 | 0.07966000  | 2.54846100  |
| C | -0.90060800 | 2.83143900  | 0.93909400  | C | -4.95543500 | -0.80276000 | -0.07224500 |
| C | -0.08201700 | 2.98014600  | -0.34974000 | H | -5.17584800 | -0.11808100 | -0.90752700 |
| O | -0.07150800 | 4.06186200  | -0.95357700 | H | -4.33587800 | -1.62850000 | -0.43663000 |
| O | 0.55005300  | 1.91557700  | -0.74479500 | H | -5.90292700 | -1.20078500 | 0.31706900  |
| H | -0.91345700 | 3.79029800  | 1.48299000  | H | -2.75916200 | 0.48517400  | 3.18006000  |
| H | -1.92584800 | 2.58864000  | 0.63628400  | H | -2.17179300 | 1.64571200  | 1.96443000  |
| F | -0.12902200 | -0.72849300 | -1.80552600 | F | -0.57179200 | -0.68182100 | -1.73952300 |

**Table S44** Atomic coordinates (x,y,z) of [Sc(OH<sub>2</sub>)(L<sup>III</sup>)]<sup>+</sup> isomers.

| Sc(OH <sub>2</sub> )(L <sup>III</sup> ) <sup>+</sup> ΔM | [Sc(OH <sub>2</sub> )(L <sup>III</sup> ) <sup>+</sup> ΔM |
|---------------------------------------------------------|----------------------------------------------------------|
| Sc 0.00000000 0.00000000 0.00000000                     | Sc 0.00000000 0.00000000 0.00000000                      |
| N -0.45110300 1.74778300 1.60267400                     | N -0.79300600 -0.36779600 -2.23754000                    |
| C 0.69647600 2.32541700 2.36145700                      | C -1.67785000 0.70012000 -2.80775600                     |
| C 2.03912100 2.01502200 1.71674300                      | C -2.21999600 1.64840300 -1.74425000                     |
| N 2.09710500 0.57708400 1.40138400                      | N -1.10775900 2.05741100 -0.86767300                     |
| C 2.19598000 -0.21812400 2.65581900                     | C -0.20263900 2.97933200 -1.61202000                     |
| C 1.24288800 -1.39864600 2.70000600                     | C 1.26651100 2.66385500 -1.41463800                      |
| N -0.12220100 -1.06715900 2.21980600                    | N 1.54070900 1.20810300 -1.50045700                      |
| C -0.85268000 -0.14725600 3.16105900                    | C 1.36597300 0.69184800 -2.90049900                      |
| C -1.43706400 1.10681200 2.49828900                     | C 0.45707500 -0.53494900 -3.01670000                     |
| H -1.77558100 1.79706500 3.29247100                     | H 0.24325600 -0.71343800 -4.08577600                     |
| H -2.31348200 0.84920200 1.88952400                     | H 0.96380500 -1.42688500 -2.62620500                     |
| H -0.16588600 0.13755500 3.96733800                     | H 0.97773300 1.50814400 -3.52190900                      |
| H -1.67898600 -0.69053700 3.64298500                    | H 2.34585700 0.42531200 -3.32389300                      |
| C -0.84966600 -2.35018900 2.07982100                    | C 2.92892600 1.00017200 -1.02897000                      |
| C -2.11408900 -2.14325600 1.30762700                    | C 3.17072700 -0.44995900 -0.75452600                     |
| C -3.29293100 -2.85924600 1.52731000                    | C 4.40678200 -1.08127400 -0.91252900                     |
| C -4.40583400 -2.58044000 0.73419400                    | C 4.51082000 -2.43946100 -0.61386200                     |
| C -4.31740700 -1.58033900 -0.23753000                   | C 3.37326200 -3.13477400 -0.19507100                     |
| C -3.11011300 -0.90508000 -0.38279800                   | C 2.17803700 -2.43407900 -0.07525900                     |
| N -2.02902200 -1.19788000 0.36089700                    | C 0.87025100 -3.08344300 0.29218900                      |
| C -2.90801300 0.23598300 -1.34473700                    | O 0.83165700 -4.29758900 0.55434400                      |
| O -3.83002100 0.57346000 -2.10705000                    | O -0.13381200 -2.28357300 0.28115900                     |
| O -1.74951500 0.78445700 -1.27213200                    | N 2.08936600 -1.11563900 -0.32531800                     |
| H -5.16333700 -1.30722200 -0.86667700                   | H 3.39303500 -4.20157000 0.02302300                      |
| H -5.33951900 -3.12452100 0.88534600                    | H 5.46523400 -2.95619300 -0.72619000                     |
| H -3.33001600 -3.61236000 2.31484400                    | H 5.26379800 -0.51063300 -1.27101900                     |
| H -0.20583700 -3.04407200 1.51732800                    | H 3.05164800 1.55797100 -0.08790100                      |
| H -1.05362000 -2.80597400 3.06273100                    | H 3.66305500 1.39651800 -1.74963300                      |
| H 1.20247600 -1.78873200 3.73303000                     | H 1.85985700 3.21344400 -2.16735900                      |
| H 1.61333900 -2.20581900 2.05846300                     | H 1.60021600 2.99398600 -0.42563400                      |
| H 2.01205100 0.44649400 3.50704900                      | H -0.45364300 2.92889900 -2.67676600                     |
| H 3.22252800 -0.59744600 2.78502100                     | H -0.38903700 4.02054100 -1.30342200                     |
| C 3.19418100 0.25838500 0.48302200                      | C -1.54632400 2.66907700 0.39298200                      |
| C 2.86998300 -1.05557600 -0.19944300                    | C -0.38977500 2.65362800 1.39242400                      |
| O 1.64941700 -1.39659700 -0.26014200                    | O -0.30753200 3.50427100 2.28491100                      |
| N 3.81721500 -1.81714800 -0.73013500                    | O 0.44619500 1.66917000 1.23367500                       |
| C 3.45798200 -3.07708200 -1.38439300                    | H -1.92746400 3.69511400 0.25959900                      |
| H 2.57591200 -3.51280000 -0.90326100                    | H -2.35242500 2.05192800 0.82238800                      |
| H 3.24659300 -2.91225800 -2.45314600                    | H -2.68516000 2.52014500 -2.23924100                     |
| H 4.30493600 -3.76889700 -1.29152800                    | H -2.98415700 1.16397900 -1.13001000                     |
| C 5.22612200 -1.43199000 -0.81261700                    | H -1.10532300 1.26094000 -3.55461400                     |
| H 5.57449200 -1.60979700 -1.84002000                    | H -2.51596400 0.23749900 -3.34991100                     |

|   |             |             |             |   |             |             |             |
|---|-------------|-------------|-------------|---|-------------|-------------|-------------|
| H | 5.36496000  | -0.37179300 | -0.58306700 | C | -1.56195800 | -1.61994800 | -2.12912600 |
| H | 5.83158200  | -2.04173000 | -0.12476100 | C | -2.42638900 | -1.51976400 | -0.88158600 |
| H | 4.16651800  | 0.23086500  | 0.99774800  | O | -2.12263300 | -0.64094400 | -0.01779700 |
| H | 3.24326100  | 1.02991500  | -0.30160900 | N | -3.46155000 | -2.33087600 | -0.70473100 |
| H | 2.85091100  | 2.31201900  | 2.40597900  | C | -3.78734500 | -3.44632800 | -1.59253100 |
| H | 2.16981500  | 2.57534000  | 0.78597000  | H | -3.04074200 | -3.56101800 | -2.38322700 |
| H | 0.66925900  | 1.93732200  | 3.38517300  | H | -3.81130100 | -4.37400200 | -1.00155400 |
| H | 0.57457600  | 3.41620900  | 2.44504500  | H | -4.77781300 | -3.29210200 | -2.04634500 |
| C | -1.00629000 | 2.78080900  | 0.71115400  | C | -4.24804800 | -2.24337700 | 0.52691700  |
| C | -0.11836800 | 2.90557400  | -0.53337700 | H | -3.78610000 | -2.84832200 | 1.32371600  |
| O | -0.12000800 | 3.94442600  | -1.20242300 | H | -4.31549400 | -1.20128000 | 0.85795600  |
| O | 0.58926700  | 1.84941300  | -0.81596600 | H | -5.25484600 | -2.62875900 | 0.32280500  |
| H | -1.09908800 | 3.75815800  | 1.21097500  | H | -2.16239300 | -1.79511300 | -3.03317000 |
| H | -2.00105900 | 2.47012500  | 0.36590300  | H | -0.87727500 | -2.46767700 | -1.99845800 |
| O | -0.03505100 | -0.95101700 | -2.10608400 | O | -0.06777100 | -0.64350300 | 2.24521400  |
| H | 0.85645700  | -1.11543400 | -2.45621800 | H | -0.59181800 | -0.02018900 | 2.77581500  |
| H | -0.45558000 | -0.31574100 | -2.71069000 | H | -0.55964700 | -1.48331400 | 2.25057400  |

**Table S45** Atomic coordinates (x,y,z) of [Sc(OH)(L<sup>III</sup>)] isomers.

| [Sc(OH)(L <sup>III</sup> )] ΔM        | [Sc(OH)(L <sup>III</sup> )] ΔM        |
|---------------------------------------|---------------------------------------|
| Sc 0.00000000 0.00000000 0.00000000   | Sc 0.00000000 0.00000000 0.00000000   |
| N -0.49964200 1.71742900 1.76837800   | N 0.85352200 -0.44215300 2.33242300   |
| C 0.63329000 2.24822900 2.57002500    | C 1.75976800 0.58424800 2.92122000    |
| C 1.98638200 1.97247500 1.93070900    | C 2.35008200 1.51381000 1.86908200    |
| N 2.07284200 0.55196600 1.55376200    | N 1.26390600 2.01763600 1.01512200    |
| C 2.14470400 -0.29640500 2.77460800   | C 0.41419100 2.95837900 1.79332200    |
| C 1.18685900 -1.47746700 2.77099300   | C -1.07636600 2.72358300 1.62241300   |
| N -0.16056600 -1.13746100 2.25936100  | N -1.44147600 1.28867500 1.64467400   |
| C -0.91636000 -0.25951300 3.21618500  | C -1.27683800 0.68979300 3.00997200   |
| C -1.49399700 1.02485200 2.60549800   | C -0.41335600 -0.57803400 3.08001700  |
| H -1.85589700 1.66435100 3.43381900   | H -0.23583500 -0.80607200 4.14845200  |
| H -2.35680400 0.79382500 1.96803600   | H -0.95239100 -1.42969600 2.64553100  |
| H -0.24841700 -0.00642700 4.04919900  | H -0.86358900 1.45822400 3.67574000   |
| H -1.74995200 -0.82523400 3.66020500  | H -2.26431000 0.43383400 3.42419800   |
| C -0.87953000 -2.41197200 2.04928000  | C -2.84395100 1.19579000 1.18581600   |
| C -2.14430500 -2.16960200 1.28551000  | C -3.19978300 -0.22387100 0.87076600  |
| C -3.31613500 -2.91068200 1.45910100  | C -4.48214700 -0.76009600 1.02044700  |
| C -4.43106200 -2.59530700 0.68272000  | C -4.69078500 -2.10067900 0.69823500  |
| C -4.35010200 -1.53761300 -0.22650300 | C -3.60770000 -2.87694600 0.27647600  |
| C -3.14789300 -0.84394200 -0.32976900 | C -2.36021900 -2.26942100 0.17404100  |
| N -2.06674400 -1.16859800 0.39896500  | C -1.09234300 -3.02160300 -0.14286800 |
| C -2.95495400 0.34624700 -1.23564500  | O -1.15461000 -4.22611000 -0.46054400 |
| O -3.88923300 0.70709300 -1.97837800  | O -0.02615600 -2.32776500 -0.01876700 |
| O -1.80634900 0.90100800 -1.14336900  | N -2.17504000 -0.96309700 0.42926400  |
| H -5.19691800 -1.23616400 -0.84139000 | H -3.70852800 -3.93793500 0.05213900  |
| H -5.35937700 -3.15731300 0.79780500  | H -5.68255000 -2.54409400 0.80178600  |
| H -3.34616600 -3.71208500 2.19798800  | H -5.29224300 -0.13284800 1.39367100  |
| H -0.23061600 -3.07209400 1.45231100  | H -2.93548500 1.79215200 0.26477400   |
| H -1.08830500 -2.92514900 3.00388500  | H -3.54443100 1.61961000 1.92620900   |
| H 1.11920400 -1.88149400 3.79852700   | H -1.61788200 3.27405000 2.41454200   |
| H 1.57650200 -2.27308800 2.12881700   | H -1.41120900 3.12000900 0.65900700   |
| H 1.95301100 0.33395400 3.65055700    | H 0.68263100 2.87879100 2.85285100    |
| H 3.16823800 -0.68560100 2.90479600   | H 0.63843900 3.99870500 1.50378100    |
| C 3.21693600 0.30531300 0.67528800    | C 1.74661500 2.64987100 -0.21408700   |
| C 3.01623900 -1.03003500 -0.01437700  | C 0.59139000 2.79722600 -1.20393600   |
| O 1.84981000 -1.50452900 -0.04849300  | O 0.60761900 3.70112700 -2.05592900   |
| N 4.03966900 -1.66854400 -0.58891700  | O -0.33740800 1.90782200 -1.09049200  |
| C 3.77596100 -2.90116300 -1.33183900  | H 2.22132300 3.63064000 -0.03406600   |
| H 3.03211700 -3.50926000 -0.80473200  | H 2.49365700 1.98787000 -0.68231400   |
| H 3.40321700 -2.67719600 -2.34521300  | H 2.88734900 2.33925200 2.37396000    |
| H 4.71416200 -3.46389500 -1.41504900  | H 3.07043400 0.98642700 1.23578100    |
| C 5.36338200 -1.08260500 -0.78304300  | H 1.19870000 1.16389000 3.66257000    |
| H 5.51977300 -0.86694200 -1.85233600  | H 2.57616300 0.09457600 3.47498900    |

|   |             |             |             |   |             |             |             |
|---|-------------|-------------|-------------|---|-------------|-------------|-------------|
| H | 5.47527000  | -0.15240300 | -0.21925100 | C | 1.58886800  | -1.70474300 | 2.19492100  |
| H | 6.13501200  | -1.79371700 | -0.45370800 | C | 2.40897400  | -1.63552500 | 0.91315500  |
| H | 4.17248200  | 0.34590300  | 1.22367600  | O | 2.10750300  | -0.76688400 | 0.04376900  |
| H | 3.24485600  | 1.08049200  | -0.10731900 | N | 3.42139700  | -2.47568800 | 0.70775000  |
| H | 2.78664800  | 2.25267000  | 2.64212000  | C | 3.73667800  | -3.60924900 | 1.57397100  |
| H | 2.12201600  | 2.57337600  | 1.02592000  | H | 3.11260100  | -3.61253800 | 2.47155400  |
| H | 0.59539100  | 1.80682900  | 3.57193500  | H | 3.56437100  | -4.54796700 | 1.02458800  |
| H | 0.51673500  | 3.33472000  | 2.71355100  | H | 4.79430900  | -3.56691100 | 1.87335600  |
| C | -1.03570400 | 2.78852100  | 0.92201800  | C | 4.13518800  | -2.42338500 | -0.56984000 |
| C | -0.13175000 | 2.98357800  | -0.30313400 | H | 3.53950100  | -2.89222400 | -1.36961800 |
| O | -0.12165700 | 4.07324500  | -0.89426800 | H | 4.34421800  | -1.38300400 | -0.84635400 |
| O | 0.56955100  | 1.95117000  | -0.65974800 | H | 5.08123100  | -2.96688400 | -0.46030000 |
| H | -1.13809800 | 3.74401900  | 1.46414700  | H | 2.22612400  | -1.89294300 | 3.07209100  |
| H | -2.02397100 | 2.49686300  | 0.54392000  | H | 0.88729200  | -2.54114900 | 2.09278100  |
| O | 0.07386800  | -0.86987400 | -1.81512300 | O | -0.12467600 | -0.52842800 | -1.95011600 |
| H | 0.82003700  | -1.49011700 | -1.79178800 | H | -0.22965500 | 0.30944100  | -2.42841700 |



**Table S46** Atomic coordinates (x,y,z) of [Sc(L<sup>III</sup>)]<sup>+</sup> isomers.

| [Sc(L <sup>III</sup> )] <sup>+</sup> ΔP | [Sc(L <sup>III</sup> )] <sup>+</sup> ΔP |
|-----------------------------------------|-----------------------------------------|
| Sc 0.00000000 0.00000000 0.00000000     | Sc 0.00000000 0.00000000 0.00000000     |
| N -0.74195000 0.39613300 -2.23134800    | N 0.52585000 1.99078900 1.15503100      |
| C -1.70505800 -0.62497400 -2.75909900   | C -0.65703500 2.72261500 1.70868700     |
| C -2.25030200 -1.56082800 -1.68146900   | C -1.99148900 2.20314000 1.18095600     |
| N -1.15985400 -1.99805700 -0.78219600   | N -2.00803100 0.71837200 1.16924000     |
| C -0.26452100 -2.96591900 -1.48326700   | C -2.09279200 0.19036600 2.56794200     |
| C 1.21073700 -2.66882400 -1.28371200    | C -1.09625400 -0.91646000 2.85896500    |
| N 1.51875600 -1.23318700 -1.49782600    | N 0.27602900 -0.57800100 2.40935600     |
| C 1.30968400 -0.81103100 -2.92113600    | C 0.87188400 0.57736500 3.15118600      |
| C 0.48968400 0.46791300 -3.05216300     | C 1.48470400 1.61726600 2.21932400      |
| H 0.25093400 0.63809200 -4.11691900     | H 1.79532600 2.49952200 2.80677400      |
| H 1.06605300 1.33423800 -2.70057000     | H 2.38059600 1.21486800 1.72652400      |
| H 0.83009600 -1.63263900 -3.46526500    | H 0.09845400 1.03375500 3.77985300      |
| H 2.28189700 -0.64806800 -3.40927700    | H 1.65299000 0.21964000 3.83787000      |
| C 2.92230300 -0.97798800 -1.09963100    | C 1.13784900 -1.77067500 2.56140500     |
| C 3.11169700 0.48567600 -0.83623900     | C 2.29823100 -1.69333000 1.61660600     |
| C 4.25906400 1.22166700 -1.13561900     | C 3.58205100 -2.16977300 1.88723500     |
| C 4.30049100 2.57249200 -0.78257300     | C 4.54824900 -2.10604900 0.88135700     |
| C 3.20867800 3.15029800 -0.12746700     | C 4.20433900 -1.59086400 -0.37171000    |
| C 2.10732700 2.34538100 0.14247100      | C 2.90193400 -1.14130600 -0.56078100    |
| N 2.06378000 1.05346900 -0.22260200     | C 2.36655900 -0.62999300 -1.87525700    |
| C 0.88042000 2.79827100 0.89464300      | O 3.11717200 -0.51342500 -2.85291700    |
| O 0.74793500 3.98240200 1.22699800      | O 1.10045400 -0.36535200 -1.85509300    |
| O 0.04197600 1.84183700 1.14443600      | N 1.98408300 -1.17458000 0.42059900     |
| H 3.20326900 4.19592600 0.17733100      | H 4.91766200 -1.54014800 -1.19325800    |
| H 5.18259300 3.17142700 -1.01446600     | H 5.56166100 -2.46344000 1.07085500     |
| H 5.09788900 0.74084300 -1.63891200     | H 3.81254600 -2.58091400 2.87022400     |
| H 3.11302700 -1.51705100 -0.15853800    | H 0.54779500 -2.65816300 2.28448600     |
| H 3.63236100 -1.35345600 -1.85289900    | H 1.46804200 -1.90346800 3.60350900     |
| H 1.80327300 -3.30503200 -1.96559800    | H -1.11686600 -1.13999500 3.94118400    |
| H 1.51534700 -2.90893200 -0.25702900    | H -1.38454600 -1.83185700 2.32415300    |
| H -0.51151700 -2.95962300 -2.55066900   | H -1.94896200 1.02506800 3.26324800     |
| H -0.46773100 -3.98873600 -1.12993800   | H -3.10496900 -0.19618600 2.76081600    |
| C -1.66233600 -2.56850500 0.47932800    | C -3.12324600 0.21313900 0.34594800     |
| C -0.60664400 -2.45846200 1.57706200    | C -2.76527100 -1.14990900 -0.21271900   |
| O -0.55634200 -3.26542100 2.50361800    | O -1.52821900 -1.39687900 -0.41258900   |
| O 0.18639900 -1.41791100 1.46616300     | N -3.69578200 -2.03749900 -0.52034500   |
| H -1.99593400 -3.61260800 0.36954200    | C -3.32356600 -3.35314400 -1.04665100   |
| H -2.52037000 -1.96634300 0.81870500    | H -3.40317200 -3.36087100 -2.14491900   |
| H -2.73482400 -2.42526400 -2.16945400   | H -2.29954100 -3.60055800 -0.75066300   |
| H -3.00411700 -1.05485600 -1.07168000   | H -4.01683500 -4.09819100 -0.63409800   |
| H -1.19646200 -1.20114100 -3.53998000   | C -5.13519900 -1.77712300 -0.42411500   |
| H -2.54750200 -0.11810700 -3.25343400   | H -5.35276300 -0.70558700 -0.45763800   |

|   |             |            |             |   |             |             |             |
|---|-------------|------------|-------------|---|-------------|-------------|-------------|
| C | -1.39604700 | 1.71530900 | -2.12978400 | H | -5.62249400 | -2.25067100 | -1.28677600 |
| C | -2.33634200 | 1.66694700 | -0.93784700 | H | -5.54578300 | -2.21466500 | 0.49852800  |
| O | -2.07981300 | 0.80523600 | -0.04434600 | H | -4.06445400 | 0.20248800  | 0.91147100  |
| N | -3.36177700 | 2.50182600 | -0.82807700 | H | -3.25569800 | 0.87562500  | -0.52376400 |
| C | -3.62936000 | 3.60014300 | -1.75631300 | H | -2.80730300 | 2.59967800  | 1.81052100  |
| H | -2.80181300 | 3.74341300 | -2.45685900 | H | -2.16036500 | 2.54401100  | 0.15589200  |
| H | -4.55710800 | 3.40838400 | -2.31650100 | H | -0.62667800 | 2.65035800  | 2.80108900  |
| H | -3.75351600 | 4.52587300 | -1.17569900 | H | -0.57392000 | 3.79384800  | 1.46988500  |
| C | -4.23652300 | 2.43276900 | 0.34397300  | C | 1.15079400  | 2.77136700  | 0.06891000  |
| H | -3.87696900 | 3.11056400 | 1.13455900  | C | 0.24291500  | 2.71938100  | -1.16181200 |
| H | -5.24567700 | 2.74146800 | 0.04159100  | O | 0.26762400  | 3.61345900  | -2.01297700 |
| H | -4.26771000 | 1.40854700 | 0.72987300  | O | -0.49783400 | 1.65224900  | -1.22467500 |
| H | -1.90436100 | 1.98214600 | -3.06729600 | H | 1.35912200  | 3.81186000  | 0.36430500  |
| H | -0.63220900 | 2.48141100 | -1.91830900 | H | 2.10365700  | 2.28991200  | -0.20897900 |

**Table S47** Atomic coordinates (x,y,z) of [ScF(L<sup>111</sup>)] isomers.

| [ScF(L <sup>111</sup> )] ΔP           | [ScF(L <sup>111</sup> )] ΔP           |
|---------------------------------------|---------------------------------------|
| Sc 0.00000000 0.00000000 0.00000000   | Sc 0.00000000 0.00000000 0.00000000   |
| N 0.86327700 0.03106700 2.31901300    | N 0.35179500 1.73783700 1.75073300    |
| C 0.90366700 -1.35004900 2.91263700   | C -0.82119600 2.25014300 2.50708200   |
| C 0.56411100 -2.47452500 1.92685000   | C -2.13512100 1.97007500 1.79446300   |
| N -0.62727200 -2.10392100 1.14365600  | N -2.18586700 0.54765900 1.42758000   |
| C -1.83512000 -2.15028900 2.01557400  | C -2.30494200 -0.29252700 2.64741100  |
| C -2.76384300 -0.96141600 1.84387900  | C -1.34463900 -1.46937600 2.68065400  |
| N -2.00186200 0.29612200 1.80774300   | N 0.03029500 -1.13515800 2.23426600   |
| C -1.43726700 0.62148400 3.14370900   | C 0.74457700 -0.24408000 3.21334700   |
| C 0.04684300 0.97118900 3.12503400    | C 1.32350000 1.05094500 2.62195400    |
| H 0.41192600 1.00956500 4.16830800    | H 1.65175900 1.69186200 3.46253700    |
| H 0.19566800 1.96776500 2.69086100    | H 2.20795400 0.83023000 2.01043700    |
| H -1.61171500 -0.22791400 3.81575900  | H 0.05045500 -0.00457800 4.02928200   |
| H -1.97550700 1.47320000 3.59170200   | H 1.57610800 -0.79669800 3.67635600   |
| C -2.85940900 1.37444000 1.30141400   | C 0.74165500 -2.42466200 2.08233600   |
| C -2.02561600 2.56577500 0.93593100   | C 2.02756200 -2.23500600 1.34098000   |
| C -2.42870100 3.88281500 1.17233500   | C 3.15638900 -3.03995500 1.51963600   |
| C -1.57834200 4.92768900 0.81258100   | C 4.29210800 -2.78088500 0.75334700   |
| C -0.34003000 4.62569000 0.24397000   | C 4.28014800 -1.70751800 -0.14189200  |
| C -0.01354900 3.28753300 0.04258000   | C 3.12273900 -0.94191200 -0.24109200  |
| N -0.84380200 2.28002300 0.36596100   | C 3.01716500 0.30153900 -1.08751700   |
| C 1.31117300 2.85243200 -0.52785600   | O 3.95195800 0.59870600 -1.85923200   |
| O 2.16754700 3.70573800 -0.81991700   | O 1.94450000 0.96899200 -0.90430400   |
| O 1.44138100 1.58268800 -0.65900300   | N 2.01433900 -1.22273500 0.46548700   |
| H 0.37395100 5.39892800 -0.03543500   | H 5.15031700 -1.44443600 -0.74168400  |
| H -1.87041400 5.96416200 0.98924100   | H 5.18619100 -3.39599700 0.86820000   |
| H -3.39311800 4.07408800 1.64371400   | H 3.13638900 -3.84747300 2.25217800   |
| H -3.36149700 1.00852300 0.39262300   | H 0.09785300 -3.09666100 1.49355700   |
| H -3.64356900 1.66038800 2.02554500   | H 0.91770000 -2.90760900 3.05880000   |
| H -3.49919000 -0.96263100 2.67182700  | H -1.32507300 -1.88154400 3.70663700  |
| H -3.32362200 -1.03845800 0.90753200  | H -1.70430700 -2.26287400 2.01742900  |
| H -1.50235800 -2.21128600 3.05754200  | H -2.14795900 0.34010700 3.52803600   |
| H -2.39603200 -3.07903800 1.82100300  | H -3.33080400 -0.68654000 2.74094000  |
| C -0.85470700 -2.90068300 -0.07027700 | C -3.26366200 0.26101700 0.48162900   |
| C -1.79561900 -2.13231000 -1.01290200 | C -2.95706700 -1.07001800 -0.17843900 |
| O -2.46239200 -2.75091300 -1.85683800 | O -1.74934600 -1.42520800 -0.24242300 |
| O -1.80710400 -0.84821000 -0.85732300 | N -3.93212800 -1.83293500 -0.67326800 |
| H -1.27206400 -3.89855300 0.14779300  | C -3.61052200 -3.12662300 -1.27432500 |
| H 0.10184900 -3.03659800 -0.59750000  | H -3.44108600 -3.02433300 -2.35871500 |
| H 0.40041900 -3.40675600 2.49921300   | H -2.71232000 -3.54494300 -0.80745300 |
| H 1.39035200 -2.64331100 1.23066900   | H -4.45736800 -3.80656600 -1.11128500 |
| H 0.21138700 -1.37752200 3.76250800   | C -5.32971900 -1.41621200 -0.77068600 |
| H 1.90345300 -1.54240600 3.33092600   | H -5.44051000 -0.34187500 -0.59776700 |

|   |            |             |             |   |             |             |             |
|---|------------|-------------|-------------|---|-------------|-------------|-------------|
| C | 2.23200000 | 0.56470900  | 2.21938500  | H | -5.68990000 | -1.63635700 | -1.78623900 |
| C | 2.94101000 | -0.17025300 | 1.10114800  | H | -5.95232000 | -1.97053200 | -0.05095600 |
| O | 2.23185400 | -0.80576500 | 0.28169600  | H | -4.25120300 | 0.26590000  | 0.96967800  |
| N | 4.27218500 | -0.12165400 | 1.00498400  | H | -3.26717500 | 1.03051400  | -0.30691400 |
| C | 5.12337900 | 0.69576300  | 1.86507300  | H | -2.97627000 | 2.25295500  | 2.45595500  |
| H | 4.53555500 | 1.40097700  | 2.45986900  | H | -2.22000300 | 2.56325300  | 0.87767600  |
| H | 5.71975900 | 0.05972700  | 2.53843000  | H | -0.82821100 | 1.79631300  | 3.50381100  |
| H | 5.81247200 | 1.27563300  | 1.23304800  | H | -0.71895200 | 3.33483600  | 2.66937900  |
| C | 4.95968300 | -0.83517300 | -0.06847600 | C | 0.90058300  | 2.83177500  | 0.93824000  |
| H | 5.18977900 | -0.15375000 | -0.90387400 | C | 0.08186600  | 2.98012500  | -0.35057500 |
| H | 5.90225900 | -1.24087300 | 0.32493800  | O | 0.07116700  | 4.06170300  | -0.95465700 |
| H | 4.33425600 | -1.65596100 | -0.43391900 | O | -0.55012400 | 1.91539700  | -0.74529900 |
| H | 2.76485000 | 0.46993500  | 3.17858000  | H | 0.91341400  | 3.79075700  | 1.48191100  |
| H | 2.18891400 | 1.63301000  | 1.96016500  | H | 1.92579500  | 2.58888300  | 0.63542400  |
| F | 0.57098000 | -0.70038000 | -1.73203200 | F | 0.12901700  | -0.72896300 | -1.80538300 |

**Table S48** Atomic coordinates (x,y,z) of [Sc(OH<sub>2</sub>)(L<sup>III</sup>)]<sup>+</sup> isomers.

| Sc(OH <sub>2</sub> )(L <sup>III</sup> ) <sup>+</sup> ΔP | [Sc(OH <sub>2</sub> )(L <sup>III</sup> ) <sup>+</sup> ΔP |
|---------------------------------------------------------|----------------------------------------------------------|
| Sc 0.00000000 0.00000000 0.00000000                     | Sc 0.00000000 0.00000000 0.00000000                      |
| N 0.79535400 -0.36680300 -2.23616700                    | N 0.45266300 1.74567500 1.60468300                       |
| C 1.67810900 0.70330800 -2.80587700                     | C -0.69495000 2.32480400 2.36239200                      |
| C 2.21640800 1.65386800 -1.74236600                     | C -2.03751100 2.01641400 1.71648100                      |
| N 1.10197000 2.06026500 -0.86738800                     | N -2.09725100 0.57868800 1.40060200                      |
| C 0.19494700 2.97893700 -1.61346600                     | C -2.19841700 -0.21686900 2.65461700                     |
| C -1.27356000 2.65929600 -1.41760400                    | C -1.24719100 -1.39889500 2.69888900                     |
| N -1.54341900 1.20272200 -1.50260400                    | N 0.11865500 -1.06901000 2.21988000                      |
| C -1.36620600 0.68613200 -2.90209700                    | C 0.84948100 -0.15088900 3.16247100                      |
| C -0.45348000 -0.53787200 -3.01664400                   | C 1.43653500 1.10266200 2.50112600                       |
| H -0.23790800 -0.71629700 -4.08537800                   | H 1.77512400 1.79195000 3.29612200                       |
| H -0.95799400 -1.43111900 -2.62628800                   | H 2.31329600 0.84405400 1.89327400                       |
| H -0.97989900 1.50318800 -3.52370600                    | H 0.16223600 0.13452600 3.96815000                       |
| H -2.34493700 0.41635700 -3.32613700                    | H 1.67441300 -0.69571700 3.64502000                      |
| C -2.93113300 0.99073600 -1.03164900                    | C 0.84446700 -2.35287100 2.07938800                      |
| C -3.16855500 -0.46008000 -0.75676700                   | C 2.10990300 -2.14701800 1.30857200                      |
| C -4.40252700 -1.09538200 -0.91516600                   | C 3.28768500 -2.86442500 1.52924100                      |
| C -4.50253200 -2.45368100 -0.61557500                   | C 4.40181200 -2.58650800 0.73752200                      |
| C -3.36315700 -3.14514100 -0.19532200                   | C 4.31562100 -1.58589300 -0.23386400                     |
| C -2.17020600 -2.44063900 -0.07516800                   | C 3.10921700 -0.90922100 -0.38022400                     |
| N -2.08544100 -1.12216300 -0.32640400                   | C 2.90950900 0.23243900 -1.34198500                      |
| C -0.86073800 -3.08540300 0.29439500                    | O 3.83281100 0.56917100 -2.10307900                      |
| O -0.81845700 -4.29921300 0.55772600                    | O 1.75154700 0.78224700 -1.27058900                      |
| O 0.14070000 -2.28233400 0.28340400                     | N 2.02699800 -1.20112800 0.36210600                      |
| H -3.37986100 -4.21179600 0.02371100                    | H 5.16260400 -1.31343700 -0.86187300                     |
| H -5.45526100 -2.97345500 -0.72816800                   | H 5.33470600 -3.13170300 0.88955600                      |
| H -5.26110100 -0.52764800 -1.27454400                   | H 3.32302400 -3.61791000 2.31650800                      |
| H -3.05593700 1.54846900 -0.09081700                    | H 0.20019500 -3.04532200 1.51563000                      |
| H -3.66618200 1.38459200 -1.75274100                    | H 1.04690200 -2.80986600 3.06205600                      |
| H -1.86759300 3.20656100 -2.17148600                    | H -1.20810600 -1.78957400 3.73173800                     |
| H -1.60943500 2.98927500 -0.42930900                    | H -1.61834600 -2.20524000 2.05671100                     |
| H 0.44737400 2.92839600 -2.67787700                     | H -2.01411500 0.44705000 3.50630300                      |
| H 0.37786300 4.02094000 -1.30543700                     | H -3.22567300 -0.59461000 2.78285300                     |
| C 1.53680000 2.67387400 0.39367700                      | C -3.19405000 0.26163700 0.48125100                      |
| C 0.37819500 2.65584900 1.39096300                      | C -2.87160000 -1.05378300 -0.19914600                    |
| O 0.29200200 3.50687300 2.28274600                      | O -1.65120700 -1.39512600 -0.26141300                    |
| O -0.45452700 1.66869900 1.23169900                     | N -3.81859000 -1.81804700 -0.72650000                    |
| H 1.91546000 3.70083600 0.26033900                      | C -3.45441600 -3.07650600 -1.38136700                    |
| H 2.34375700 2.05910300 0.82490600                      | H -3.21223200 -2.90598800 -2.44268100                    |
| H 2.67961100 2.52660800 -2.23744300                     | H -2.58986400 -3.52541600 -0.88051200                    |
| H 2.98122700 1.17203700 -1.12692500                     | H -4.31039600 -3.76004000 -1.31649100                    |
| H 1.10509300 1.26231400 -3.55375500                     | C -5.22751100 -1.43482400 -0.81428900                    |
| H 2.51817200 0.24270400 -3.34673300                     | H -5.37247900 -0.38167800 -0.55828600                    |

|   |            |             |             |   |             |             |             |
|---|------------|-------------|-------------|---|-------------|-------------|-------------|
| C | 1.56721600 | -1.61697800 | -2.12673600 | H | -5.56583100 | -1.58737900 | -1.84927900 |
| C | 2.43087200 | -1.51411800 | -0.87889900 | H | -5.83712900 | -2.06401000 | -0.14811400 |
| O | 2.12535400 | -0.63514500 | -0.01590100 | H | -4.16693800 | 0.23739300  | 0.99504600  |
| N | 3.46730000 | -2.32364900 | -0.70278600 | H | -3.24012100 | 1.03222200  | -0.30450400 |
| C | 3.79524200 | -3.43588200 | -1.59404400 | H | -2.84942600 | 2.31430200  | 2.40520700  |
| H | 3.02883800 | -3.57380100 | -2.36188400 | H | -2.16675300 | 2.57719800  | 0.78580200  |
| H | 4.76882300 | -3.26227100 | -2.07681500 | H | -0.66921300 | 1.93654900  | 3.38608700  |
| H | 3.85690300 | -4.35858600 | -0.99840700 | H | -0.57162100 | 3.41540600  | 2.44623800  |
| C | 4.26122200 | -2.23105400 | 0.52354000  | C | 1.01090100  | 2.77832400  | 0.71465400  |
| H | 3.81484700 | -2.84792900 | 1.32009800  | C | 0.12452200  | 2.90594800  | -0.53056100 |
| H | 5.27247700 | -2.59957100 | 0.30990500  | O | 0.12906100  | 3.94518400  | -1.19898900 |
| H | 4.31490300 | -1.18996300 | 0.85992200  | O | -0.58523900 | 1.85149300  | -0.81446700 |
| H | 2.16891700 | -1.79109500 | -3.03017600 | H | 1.10526400  | 3.75506100  | 1.21539600  |
| H | 0.88439700 | -2.46628900 | -1.99641100 | H | 2.00536300  | 2.46585800  | 0.37011700  |
| O | 0.06824300 | -0.64128400 | 2.24589200  | O | 0.03437500  | -0.94919200 | -2.10642500 |
| H | 0.58988400 | -0.01525700 | 2.77574400  | H | -0.85733200 | -1.11083000 | -2.45736100 |
| H | 0.56398200 | -1.47882500 | 2.25099100  | H | 0.45687700  | -0.31435200 | -2.71014100 |

| Table S49 Atomic coordinates (x,y,z) of [Sc(OH)(L <sup>III</sup> )] isomers. |             |             |                                |    |             |
|------------------------------------------------------------------------------|-------------|-------------|--------------------------------|----|-------------|
| [Sc(OH)(L <sup>III</sup> )] ΔP                                               |             |             | [Sc(OH)(L <sup>III</sup> )] ΔP |    |             |
| Sc                                                                           | 0.00000000  | 0.00000000  | 0.00000000                     | Sc | 0.00000000  |
| N                                                                            | -0.85344800 | -0.44227100 | 2.33262600                     | N  | 0.49966600  |
| C                                                                            | -1.75966100 | 0.58404000  | 2.92154900                     | C  | -0.63322700 |
| C                                                                            | -2.35015400 | 1.51357600  | 1.86948600                     | C  | -1.98633500 |
| N                                                                            | -1.26409500 | 2.01749900  | 1.01543200                     | N  | -2.07286200 |
| C                                                                            | -0.41439900 | 2.95831300  | 1.79355800                     | C  | -2.14475800 |
| C                                                                            | 1.07617800  | 2.72366200  | 1.62253600                     | C  | -1.18699300 |
| N                                                                            | 1.44143200  | 1.28879500  | 1.64462700                     | N  | 0.16043500  |
| C                                                                            | 1.27697700  | 0.68977300  | 3.00989700                     | C  | 0.91626900  |
| C                                                                            | 0.41356000  | -0.57810200 | 3.07998900                     | C  | 1.49397600  |
| H                                                                            | 0.23625500  | -0.80619700 | 4.14845100                     | H  | 1.85589800  |
| H                                                                            | 0.95257500  | -1.42971300 | 2.64538300                     | H  | 2.35678800  |
| H                                                                            | 0.86378700  | 1.45813700  | 3.67578200                     | H  | 0.24833900  |
| H                                                                            | 2.26451400  | 0.43381800  | 3.42396900                     | H  | 1.74982000  |
| C                                                                            | 2.84388100  | 1.19610800  | 1.18563700                     | C  | 0.87938200  |
| C                                                                            | 3.19984600  | -0.22350300 | 0.87049200                     | C  | 2.14419300  |
| C                                                                            | 4.48229800  | -0.75958500 | 1.01995800                     | C  | 3.31606500  |
| C                                                                            | 4.69101000  | -2.10016800 | 0.69780400                     | C  | 4.43104900  |
| C                                                                            | 3.60790800  | -2.87659100 | 0.27636600                     | C  | 4.35010100  |
| C                                                                            | 2.36036000  | -2.26919100 | 0.17408100                     | C  | 3.14785100  |
| N                                                                            | 2.17511100  | -0.96284600 | 0.42918400                     | C  | 2.95495500  |
| C                                                                            | 1.09246800  | -3.02151400 | -0.14245300                    | O  | 3.88932500  |
| O                                                                            | 1.15468700  | -4.22623300 | -0.45929100                    | O  | 1.80628800  |
| O                                                                            | 0.02630600  | -2.32752200 | -0.01893300                    | N  | 2.06663900  |
| H                                                                            | 3.70877500  | -3.93760300 | 0.05215500                     | H  | 5.19696000  |
| H                                                                            | 5.68284300  | -2.54347300 | 0.80117700                     | H  | 5.35939900  |
| H                                                                            | 5.29239500  | -0.13222600 | 1.39299100                     | H  | 3.34608300  |
| H                                                                            | 2.93526000  | 1.79253700  | 0.26462200                     | H  | 0.23047600  |
| H                                                                            | 3.54437500  | 1.61996900  | 1.92599400                     | H  | 1.08813500  |
| H                                                                            | 1.61768100  | 3.27410100  | 2.41469300                     | H  | -1.11942100 |
| H                                                                            | 1.41091900  | 3.12022500  | 0.65915300                     | H  | -1.57668400 |
| H                                                                            | -0.68272300 | 2.87869900  | 2.85311300                     | H  | -1.95300600 |
| H                                                                            | -0.63875400 | 3.99862400  | 1.50404100                     | H  | -3.16830700 |
| C                                                                            | -1.74698900 | 2.64970000  | -0.21372600                    | C  | -3.21704400 |
| C                                                                            | -0.59186600 | 2.79727900  | -1.20367800                    | C  | -3.01643300 |
| O                                                                            | -0.60839000 | 3.70116300  | -2.05568500                    | O  | -1.85000200 |
| O                                                                            | 0.33715400  | 1.90810900  | -1.09029700                    | N  | -4.03989300 |
| H                                                                            | -2.22181400 | 3.63040200  | -0.03363400                    | C  | -3.77614400 |
| H                                                                            | -2.49398000 | 1.98761200  | -0.68190500                    | H  | -3.40195900 |
| H                                                                            | -2.88744600 | 2.33896800  | 2.37442000                     | H  | -3.03339100 |
| H                                                                            | -3.07052400 | 0.98614400  | 1.23624600                     | H  | -4.71464500 |
| H                                                                            | -1.19852800 | 1.16371600  | 3.66282200                     | C  | -5.36374200 |
| H                                                                            | -2.57595000 | 0.09431600  | 3.47543500                     | H  | -5.47543100 |
| C                                                                            | -1.58871200 | -1.70487600 | 2.19504500                     | H  | -5.52061700 |

|   |             |             |             |   |             |             |             |
|---|-------------|-------------|-------------|---|-------------|-------------|-------------|
| C | -2.40882000 | -1.63567800 | 0.91327200  | H | -6.13518900 | -1.79348800 | -0.45255100 |
| O | -2.10743300 | -0.76695000 | 0.04394300  | H | -4.17255200 | 0.34613500  | 1.22395600  |
| N | -3.42110500 | -2.47593900 | 0.70763300  | H | -3.24496300 | 1.08081500  | -0.10702000 |
| C | -3.73658500 | -3.60952400 | 1.57373500  | H | -2.78657000 | 2.25269400  | 2.64242600  |
| H | -3.11452900 | -3.61133800 | 2.47272400  | H | -2.12198700 | 2.57349700  | 1.02622900  |
| H | -4.79490800 | -3.56844400 | 1.87079200  | H | -0.59534200 | 1.80671100  | 3.57214100  |
| H | -3.56176700 | -4.54835900 | 1.02532700  | H | -0.51660400 | 3.33464100  | 2.71387100  |
| C | -4.13432600 | -2.42355000 | -0.57030100 | C | 1.03574800  | 2.78848200  | 0.92227700  |
| H | -3.53698300 | -2.88961400 | -1.37045400 | C | 0.13164300  | 2.98369100  | -0.30276200 |
| H | -5.07903100 | -2.96960000 | -0.46210200 | O | 0.12136100  | 4.07347300  | -0.89368800 |
| H | -4.34585500 | -1.38328400 | -0.84544200 | O | -0.56956000 | 1.95127100  | -0.65948400 |
| H | -2.22596300 | -1.89316200 | 3.07219900  | H | 1.13829800  | 3.74391800  | 1.46448900  |
| H | -0.88710500 | -2.54125700 | 2.09288200  | H | 2.02394400  | 2.49676900  | 0.54403400  |
| O | 0.12431700  | -0.52803900 | -1.95022800 | O | -0.07385400 | -0.86975800 | -1.81512500 |
| H | 0.22900800  | 0.30995400  | -2.42837500 | H | -0.82037100 | -1.48959200 | -1.79208500 |



**Table S50** Atomic coordinates (x,y,z) of Sc(L<sup>021</sup>)<sup>2+</sup> isomers.

| [Sc(L <sup>021</sup> )] <sup>2+</sup> Δ |             |             | [Sc(L <sup>021</sup> )] <sup>2+</sup> Λ |             |             |
|-----------------------------------------|-------------|-------------|-----------------------------------------|-------------|-------------|
| Sc                                      | 0.00000000  | 0.00000000  | 0.00000000                              | 0.00000000  | 0.00000000  |
| N                                       | -0.53145100 | 1.32264300  | 1.93061300                              | 0.81723000  | 1.08990400  |
| C                                       | 0.64285900  | 1.84512600  | 2.69743400                              | -0.25469200 | 1.62523900  |
| C                                       | 1.95445300  | 1.72495200  | 1.93083700                              | -1.65159600 | 1.61506100  |
| N                                       | 2.06294700  | 0.38891200  | 1.29791800                              | -1.90729600 | 0.34778300  |
| C                                       | 2.27543400  | -0.66107800 | 2.34098700                              | -2.08786000 | -0.78418000 |
| C                                       | 1.39485200  | -1.88109800 | 2.15264500                              | -1.27694400 | -2.01782700 |
| N                                       | -0.03407100 | -1.53068900 | 1.92625500                              | 0.13943800  | -1.69469600 |
| C                                       | -0.66194300 | -0.85811100 | 3.11111500                              | 0.88870700  | -1.15621800 |
| C                                       | -1.38859800 | 0.43342300  | 2.75146400                              | 1.67672200  | 0.10405500  |
| H                                       | -1.71897000 | 0.93631000  | 3.67738600                              | 2.09828100  | 0.53148100  |
| H                                       | -2.28454100 | 0.20774100  | 2.15566100                              | 2.51614600  | -0.13293700 |
| H                                       | 0.11115400  | -0.67430100 | 3.86628300                              | 0.18149400  | -0.96894200 |
| H                                       | -1.38981200 | -1.53635600 | 3.57875000                              | 1.59177600  | -1.91390500 |
| C                                       | -0.76690500 | -2.77751000 | 1.59865200                              | 0.81690600  | -2.90857300 |
| C                                       | -1.95542800 | -2.49332700 | 0.73239300                              | 2.01575200  | -2.51070800 |
| C                                       | -3.13470800 | -3.24162900 | 0.74181300                              | 3.23695100  | -3.18535800 |
| C                                       | -4.12974800 | -2.94175000 | -0.18936500                             | 4.25276000  | -2.71280900 |
| C                                       | -3.92202600 | -1.91041100 | -1.11037900                             | 4.02066600  | -1.59452500 |
| C                                       | -2.72450500 | -1.20814400 | -1.04827900                             | 2.77331200  | -0.98436900 |
| N                                       | -1.77313900 | -1.49101500 | -0.14006300                             | 2.35224100  | 0.19523500  |
| C                                       | -2.35287300 | -0.09176800 | -1.98815600                             | 3.15240900  | 0.74163800  |
| O                                       | -3.13204700 | 0.26767200  | -2.87812800                             | 1.11079600  | 0.53144900  |
| O                                       | -1.17843000 | 0.41148100  | -1.76678200                             | 1.80758200  | -1.42838000 |
| H                                       | -4.66324600 | -1.64744600 | -1.86372500                             | 4.78006500  | -1.19715600 |
| H                                       | -5.06047600 | -3.51095800 | -0.19978600                             | 5.22132400  | -3.21468000 |
| H                                       | -3.26038500 | -4.04536200 | 1.46754300                              | 3.38612100  | -4.05768600 |
| H                                       | -0.09323000 | -3.42701400 | 1.01831200                              | 0.11867600  | -3.43488600 |
| H                                       | -1.05009700 | -3.32832300 | 2.50828600                              | 1.08400900  | -3.59654200 |
| H                                       | 1.50074600  | -2.53980000 | 3.03312200                              | -1.34572000 | -2.74476800 |
| H                                       | 1.72114600  | -2.44810400 | 1.27069500                              | -1.69324400 | -2.49398300 |
| H                                       | 2.10214100  | -0.21402600 | 3.32617100                              | -1.82686900 | -0.42907100 |
| H                                       | 3.32623700  | -0.98873800 | 2.33568100                              | -3.14972600 | -1.06942200 |
| C                                       | 3.14509000  | 0.37162900  | 0.29543400                              | -3.07675400 | 0.48130400  |
| C                                       | 2.83485100  | -0.66208800 | -0.76772000                             | -2.91228000 | -0.42662400 |
| O                                       | 1.60321900  | -0.89219200 | -1.02042900                             | 0.12265500  | -0.74934000 |
| N                                       | 3.78723000  | -1.28422100 | -1.43999400                             | -3.94282500 | -0.84786700 |
| C                                       | 3.43818900  | -2.27888000 | -2.45851900                             | -3.72103000 | -1.70846700 |
| H                                       | 2.49387100  | -2.76842700 | -2.19889300                             | -3.55162500 | -1.09834800 |
| H                                       | 3.34593600  | -1.80028600 | -3.44595000                             | -2.85495900 | -2.35705800 |
| H                                       | 4.24202500  | -3.02515000 | -2.49669900                             | -4.61759500 | -2.32339900 |
| C                                       | 5.21571500  | -0.98685800 | -1.31319600                             | -5.32366000 | -0.41062100 |
| H                                       | 5.63131500  | -0.85851900 | -2.32259500                             | -5.37620000 | 0.41774000  |
| H                                       | 5.38626500  | -0.06556500 | -0.75044600                             | -5.72801800 | -0.06772200 |

|   |             |             |             |   |             |             |             |
|---|-------------|-------------|-------------|---|-------------|-------------|-------------|
| H | 5.73259500  | -1.82416400 | -0.82111800 | H | -5.93461100 | -1.25116100 | -0.72714000 |
| H | 4.12197500  | 0.21105100  | 0.77004300  | H | -4.01492000 | 0.29257900  | 1.15171200  |
| H | 3.17117400  | 1.34435500  | -0.22039500 | H | -3.11407800 | 1.50900900  | 0.21842800  |
| H | 2.79516600  | 1.90258000  | 2.62448000  | H | -2.39557300 | 1.76255600  | 3.03790100  |
| H | 2.01044000  | 2.47571600  | 1.13727200  | H | -1.76244600 | 2.43606500  | 1.52190400  |
| H | 0.70304700  | 1.30621800  | 3.64874200  | H | -0.24234800 | 1.03916300  | 3.77784300  |
| H | 0.47661700  | 2.90198500  | 2.95508100  | H | -0.00746900 | 2.65749600  | 3.14421400  |
| C | -1.30010100 | 2.44634000  | 1.35553400  | C | 1.61292400  | 2.19670900  | 1.37610800  |
| C | -0.53018900 | 2.94866500  | 0.14510700  | C | 0.72834100  | 2.88820700  | 0.35337700  |
| O | 0.26949400  | 2.12758300  | -0.40200400 | O | -0.18139400 | 2.17874600  | -0.17773600 |
| N | -0.70384800 | 4.17145700  | -0.33424700 | N | 0.90115200  | 4.15988200  | 0.02427600  |
| C | -1.70161800 | 5.11444000  | 0.17113900  | C | 1.99225300  | 4.99521800  | 0.52530000  |
| H | -2.39984900 | 4.62800200  | 0.85803300  | H | 2.75799000  | 4.39499900  | 1.02465800  |
| H | -1.20826100 | 5.95642800  | 0.67963800  | H | 2.45785700  | 5.50704400  | -0.32891100 |
| H | -2.27392300 | 5.50479500  | -0.68280800 | H | 1.60246600  | 5.75325700  | 1.22169400  |
| C | 0.04488400  | 4.60933900  | -1.51448600 | C | 0.01540600  | 4.79046500  | -0.95685000 |
| H | -0.53160900 | 4.40928700  | -2.43155700 | H | 0.45244400  | 4.72961000  | -1.96601400 |
| H | 0.21994500  | 5.68979600  | -1.43136700 | H | -0.96171400 | 4.29649000  | -0.95256000 |
| H | 1.00479200  | 4.08527900  | -1.56637700 | H | -0.10587600 | 5.84681600  | -0.68369500 |
| H | -1.48552500 | 3.22936800  | 2.10360800  | H | 1.97713600  | 2.87486600  | 2.16059300  |
| H | -2.27136500 | 2.07303300  | 0.99227100  | H | 2.48287200  | 1.78137000  | 0.84152300  |

**Table S51** Atomic coordinates (x,y,z) of [ScF(L<sup>021</sup>)]<sup>+</sup> isomers.

| [ScF(L <sup>021</sup> )] <sup>+</sup> Δ | [ScF(L <sup>021</sup> )] <sup>+</sup> Λ |
|-----------------------------------------|-----------------------------------------|
| Sc 0.00000000 0.00000000 0.00000000     | Sc 0.00000000 0.00000000 0.00000000     |
| N 1.01660600 -0.85258900 2.08076500     | N -1.00564000 -0.85684800 2.07925500    |
| C 0.10273400 -1.65894300 2.95118500     | C -0.09095800 -1.66495200 2.94850000    |
| C -1.19168800 -2.07869500 2.25797700    | C 1.20205000 -2.08423500 2.25311700     |
| N -1.77905500 -0.91155400 1.57463600    | N 1.79139800 -0.91735600 1.57222600     |
| C -2.31052400 0.03946100 2.59718900     | C 2.32631700 0.03266300 2.59184500      |
| C -1.93216700 1.49028200 2.35789800     | C 1.94745700 1.48344900 2.35290900      |
| N -0.52387300 1.63711900 1.93440800     | N 0.53823000 1.63027100 1.93161600      |
| C 0.41403200 1.36679200 3.06957500      | C -0.39924800 1.36177900 3.06805200     |
| C 1.52389200 0.35851800 2.76432200      | C -1.51125400 0.35385900 2.76496800     |
| H 2.02787800 0.10052400 3.71426300      | H -2.01300100 0.09615000 3.71610600     |
| H 2.27747100 0.80570600 2.10336900      | H -2.26629200 0.80197600 2.10615400     |
| H -0.17523200 1.02211800 3.92882700     | H 0.18957800 1.01740500 3.92741400      |
| H 0.89576900 2.30376000 3.39012600      | H -0.87962200 2.29966500 3.38814000     |
| C -0.35474600 3.00832700 1.41428500     | C 0.37077700 3.00169300 1.41070700      |
| C 0.94798900 3.13079800 0.68755300      | C -0.93457600 3.12906200 0.69020600     |
| C 1.72469400 4.29255700 0.67507000      | C -1.70678900 4.29350200 0.68219100     |
| C 2.92962400 4.29117100 -0.02682900     | C -2.91361200 4.29852100 -0.01677700    |
| C 3.34212700 3.11986000 -0.66682600     | C -3.33290100 3.13008700 -0.65675100    |
| C 2.51605200 2.00329000 -0.59486500     | C -2.51165900 2.00943000 -0.58776400    |
| N 1.33132800 2.02035500 0.04161700      | C -2.89837400 0.66577600 -1.14564300    |
| C 2.89218600 0.65833300 -1.15635400     | O -3.96998400 0.53385300 -1.76275400    |
| O 3.96222100 0.52011900 -1.77567200     | O -2.05180000 -0.26480500 -0.89857600   |
| O 2.03888100 -0.26685100 -0.91201500    | N -1.32473900 2.02058700 0.04363600     |
| H 4.29056700 3.05191200 -1.19774100     | H -4.28279400 3.06636600 -1.18565000    |
| H 3.55347900 5.18603700 -0.05334400     | H -3.53308700 5.19648900 -0.04065400    |
| H 1.38640300 5.17432600 1.21985500      | H -1.36346900 5.17311600 1.22731300     |
| H -1.17216400 3.20229900 0.70281200     | H 1.18547300 3.19091100 0.69490000      |
| H -0.42577200 3.76257000 2.21715800     | H 0.44877800 3.75642300 2.21240500      |
| H -2.12285500 2.06282600 3.28485700     | H 2.13957500 2.05641000 3.27921500      |
| H -2.55499700 1.92416300 1.57123100     | H 2.56896500 1.91770300 1.56518100      |
| H -1.94840100 -0.27797700 3.58067800    | H 1.96716600 -0.28307400 3.57686200     |
| H -3.40904900 -0.03641400 2.64205600    | H 3.42506300 -0.04371300 2.63413500     |
| C -2.83443000 -1.27991600 0.62252800    | C 2.84067600 -1.28461400 0.61437400     |
| C -3.06295900 -0.08221800 -0.29016900   | C 3.06485900 -0.08519100 -0.29717100    |
| O -2.13646000 0.76806300 -0.38628800    | O 2.13489700 0.76102500 -0.39114800     |
| N -4.20722000 0.03547900 -0.96381600    | N 4.20887000 0.03785500 -0.97077500     |
| C -4.45859200 1.20034100 -1.81025000    | C 4.45570100 1.20418100 -1.81662900     |
| H -3.73384400 1.98834800 -1.58415800    | H 4.38882200 0.92695600 -2.88071800     |
| H -4.38169600 0.92530100 -2.87425000    | H 3.72223200 1.98571100 -1.59652700     |
| H -5.47580600 1.56960400 -1.61480000    | H 5.46835100 1.58263400 -1.61467500     |
| C -5.27778700 -0.95991500 -0.91240300   | C 5.28338800 -0.95316200 -0.92340600    |
| H -5.75135800 -1.00555300 -1.90246400   | H 4.89774800 -1.94920200 -0.68351100    |

|   |             |             |             |   |             |             |             |
|---|-------------|-------------|-------------|---|-------------|-------------|-------------|
| H | -4.88594900 | -1.95551200 | -0.68045300 | H | 5.74930000  | -1.00190500 | -1.91713400 |
| H | -6.04289300 | -0.68143600 | -0.17024400 | H | 6.05353300  | -0.66819000 | -0.18897400 |
| H | -3.75865200 | -1.59084800 | 1.13455300  | H | 3.76733200  | -1.59743100 | 1.12075800  |
| H | -2.48749400 | -2.12155900 | 0.00151200  | H | 2.48942400  | -2.12401600 | -0.00732900 |
| H | -1.88354600 | -2.49195200 | 3.01502200  | H | 1.89285300  | -2.50151700 | 3.00913600  |
| H | -1.00625400 | -2.85588100 | 1.51180400  | H | 1.01404500  | -2.85938000 | 1.50525300  |
| H | -0.12335700 | -1.07289100 | 3.84882700  | H | 0.13698800  | -1.08039600 | 3.84633900  |
| H | 0.62541300  | -2.56128600 | 3.30360300  | H | -0.61418100 | -2.56694900 | 3.30076500  |
| C | 2.11552600  | -1.71140000 | 1.61379700  | C | -2.10420300 | -1.71731400 | 1.61391100  |
| C | 1.56633000  | -2.58590700 | 0.49885700  | C | -1.55721700 | -2.58517300 | 0.49209600  |
| O | 0.49666400  | -2.22206500 | -0.06510900 | O | -0.48908600 | -2.21745600 | -0.07349600 |
| N | 2.20562200  | -3.69632700 | 0.13747200  | N | -2.19809400 | -3.69346500 | 0.12698400  |
| C | 3.49590500  | -4.10823900 | 0.68698700  | C | -3.48383400 | -4.11078500 | 0.68272400  |
| H | 3.98381300  | -3.28899700 | 1.22317900  | H | -3.96916700 | -3.29653700 | 1.22856200  |
| H | 3.37358000  | -4.96888300 | 1.36328300  | H | -4.14296900 | -4.40546500 | -0.14664800 |
| H | 4.14911400  | -4.40776200 | -0.14527100 | H | -3.35523300 | -4.97608100 | 1.35186100  |
| C | 1.66898500  | -4.54762100 | -0.92305900 | C | -1.66753800 | -4.53993600 | -0.94040600 |
| H | 2.17556600  | -4.33879100 | -1.87912300 | H | -2.19565300 | -4.34178000 | -1.88701200 |
| H | 1.84318400  | -5.59850700 | -0.65288700 | H | -0.59836600 | -4.34820900 | -1.07365400 |
| H | 0.59441000  | -4.37274700 | -1.03604600 | H | -1.82066700 | -5.59260800 | -0.66402300 |
| H | 2.53141400  | -2.31035000 | 2.43815200  | H | -2.51377300 | -2.32082100 | 2.43768300  |
| H | 2.92120600  | -1.09235900 | 1.19777800  | H | -2.91355600 | -1.09951900 | 1.20335000  |
| F | -0.42930000 | -0.41852500 | -1.85427700 | F | 0.40950300  | -0.38102400 | -1.86590900 |

**Table S52** Atomic coordinates (x,y,z) of [Sc(OH<sub>2</sub>)(L<sup>021</sup>)]<sup>2+</sup> isomers.

| [Sc(OH <sub>2</sub> )(L <sup>021</sup> )] <sup>2+</sup> Δ | [Sc(OH <sub>2</sub> )(L <sup>021</sup> )] <sup>2+</sup> Δ |
|-----------------------------------------------------------|-----------------------------------------------------------|
| Sc 0.00000000 0.00000000 0.00000000                       | Sc 0.00000000 0.00000000 0.00000000                       |
| N -0.73861000 1.02872500 2.04617200                       | N 0.73725300 1.02839400 2.04709800                        |
| C 0.30388300 1.59017700 2.96272600                        | C -0.30528600 1.58908200 2.96367100                       |
| C 1.64793700 1.78493000 2.27756900                        | C -1.64922600 1.78378500 2.27819600                       |
| N 1.98846300 0.55650200 1.53823400                        | N -1.98926300 0.55574100 1.53806000                       |
| C 2.32373200 -0.53528000 2.49404000                       | C -2.32421600 -0.53695500 2.49286100                      |
| C 1.66665900 -1.85644700 2.14746300                       | C -1.66691900 -1.85772900 2.14526300                      |
| N 0.23982400 -1.70691700 1.76671000                       | N -0.23987000 -1.70774100 1.76521800                      |
| C -0.61869500 -1.30133600 2.93382500                      | C 0.61789900 -1.30235100 2.93302400                       |
| C -1.50040800 -0.07179700 2.68502800                      | C 1.49933700 -0.07254100 2.68506500                       |
| H -1.93447400 0.24710000 3.64940800                       | H 1.93362100 0.24577300 3.64954600                        |
| H -2.33201800 -0.32326400 2.01449900                      | H 2.33088100 -0.32338200 2.01422600                       |
| H 0.03356600 -1.13063600 3.79881200                       | H -0.03489000 -1.13219200 3.79771600                      |
| H -1.28045700 -2.13477500 3.21209600                      | H 1.27969500 -2.13571700 3.21141700                       |
| C -0.19568900 -3.01714900 1.22795900                      | C 0.19621600 -3.01776900 1.22630700                       |
| C -1.50768400 -2.87201400 0.52607600                      | C 1.50830200 -2.87188200 0.52465700                       |
| C -2.48500700 -3.86802100 0.46483900                      | C 2.48600900 -3.86753600 0.46332700                       |
| C -3.66596600 -3.60847900 -0.23038600                     | C 3.66705200 -3.60725000 -0.23143200                      |
| C -3.85069600 -2.35500300 -0.82077300                     | C 3.85153800 -2.35340000 -0.82114000                      |
| C -2.83331500 -1.41511700 -0.70146200                     | C 2.83380800 -1.41391900 -0.70180700                      |
| N -1.68099000 -1.68088200 -0.06208800                     | C 2.93213100 -0.00471000 -1.21875200                      |
| C -2.93177100 -0.00629900 -1.21941100                     | O 3.93859900 0.36468700 -1.84342400                       |
| O -3.93739300 0.36217200 -1.84599000                      | O 1.91460300 0.72914300 -0.93277700                       |
| O -1.91492300 0.72821400 -0.93255200                      | N 1.68128500 -1.68049500 -0.06298100                      |
| H -4.76518600 -2.09314200 -1.35113700                     | H 4.76613400 -2.09098200 -1.35104100                      |
| H -4.44509600 -4.36974900 -0.29409200                     | H 4.44649700 -4.36818200 -0.29532600                      |
| H -2.31705900 -4.82240700 0.96434800                      | H 2.31826600 -4.82217400 0.96241700                       |
| H 0.55809000 -3.34936800 0.49747100                       | H -0.55738600 -3.35019900 0.49573700                      |
| H -0.24999000 -3.77917300 2.02262000                      | H 0.25075400 -3.77983400 2.02089500                       |
| H 1.76448800 -2.54430300 3.00635600                       | H -1.76501500 -2.54637000 3.00348800                      |
| H 2.17377000 -2.32100500 1.29487500                       | H -2.17366000 -2.32152400 1.29204200                      |
| H 2.02665700 -0.21954000 3.50028700                       | H -2.02729800 -0.22206500 3.49942100                      |
| H 3.41463400 -0.68480300 2.53148900                       | H -3.41508900 -0.68687400 2.53027500                      |
| C 3.07944800 0.77187700 0.58084900                        | C -3.08014600 0.77143700 0.58069900                       |
| C 3.00075900 -0.31641800 -0.47145100                      | C -3.00107000 -0.31609700 -0.47235500                     |
| O 1.87405300 -0.87295200 -0.65375200                      | O -1.87408800 -0.87202100 -0.65484400                     |
| N 4.05044400 -0.67135900 -1.19955600                      | N -4.05069500 -0.67058000 -1.20074900                     |
| C 3.88792400 -1.70424100 -2.22701300                      | C -3.88939500 -1.70336300 -2.22843300                     |
| H 3.25207400 -2.51438900 -1.85165500                      | H -3.44495500 -1.27641400 -3.14161200                     |
| H 3.43281800 -1.27977800 -3.13607200                      | H -3.24481500 -2.50851200 -1.85747200                     |
| H 4.87902200 -2.10254200 -2.47400600                      | H -4.87970200 -2.10886400 -2.46696500                     |
| C 5.34705100 0.00502600 -1.16896400                       | C -5.34839000 0.00367800 -1.16754100                      |
| H 5.58566900 0.35860300 -2.18309500                       | H -5.33401500 0.86967200 -0.50033100                      |

|   |             |             |             |   |             |             |             |
|---|-------------|-------------|-------------|---|-------------|-------------|-------------|
| H | 5.33441300  | 0.86664800  | -0.49608600 | H | -5.59246200 | 0.35053900  | -2.18264100 |
| H | 6.12967600  | -0.69801900 | -0.84767800 | H | -6.12831700 | -0.69867400 | -0.83813300 |
| H | 4.05955200  | 0.80529000  | 1.07912100  | H | -4.06029200 | 0.80429700  | 1.07893100  |
| H | 2.92211000  | 1.73291200  | 0.06554800  | H | -2.92304200 | 1.73287800  | 0.06608400  |
| H | 2.41167600  | 2.02395800  | 3.03981500  | H | -2.41327400 | 2.02239500  | 3.04026800  |
| H | 1.61299200  | 2.61521500  | 1.56600000  | H | -1.61407600 | 2.61441900  | 1.56702600  |
| H | 0.40820400  | 0.91651800  | 3.81984400  | H | -0.40961300 | 0.91504900  | 3.82048700  |
| H | -0.04057300 | 2.55127200  | 3.37177500  | H | 0.03877800  | 2.55010900  | 3.37326200  |
| C | -1.59987200 | 2.12654600  | 1.56706000  | C | 1.59826100  | 2.12647700  | 1.56821600  |
| C | -0.87517700 | 2.80767800  | 0.41525300  | C | 0.87401600  | 2.80741100  | 0.41603700  |
| O | 0.08309400  | 2.18009600  | -0.13533300 | O | -0.08405600 | 2.17979600  | -0.13492400 |
| N | -1.23619300 | 4.00863800  | -0.01346700 | N | 1.23508000  | 4.00814900  | -0.01317600 |
| C | -2.41404100 | 4.72946400  | 0.46662500  | C | 2.41307700  | 4.72909200  | 0.46642500  |
| H | -2.92133700 | 4.17884000  | 1.26348900  | H | 2.91778500  | 4.18090200  | 1.26660900  |
| H | -2.11762000 | 5.71975300  | 0.84199300  | H | 3.11851700  | 4.85990800  | -0.36824800 |
| H | -3.11745200 | 4.86449300  | -0.36907600 | H | 2.11721600  | 5.72119300  | 0.83735900  |
| C | -0.55750000 | 4.58331600  | -1.17819000 | C | 0.55672200  | 4.58070600  | -1.17926300 |
| H | -0.95262500 | 4.14609700  | -2.10915500 | H | 0.94479200  | 4.13413500  | -2.10871600 |
| H | -0.73715000 | 5.66483900  | -1.18350400 | H | -0.52222200 | 4.39746600  | -1.11708200 |
| H | 0.52008100  | 4.39112400  | -1.12103100 | H | 0.74484900  | 5.66066200  | -1.19224900 |
| H | -1.83593300 | 2.82976200  | 2.37845000  | H | 1.83368800  | 2.82985000  | 2.37967800  |
| H | -2.54174200 | 1.72024800  | 1.17665900  | H | 2.54058700  | 1.72059800  | 1.17846200  |
| O | 0.16530900  | 0.02784600  | -2.31774800 | O | -0.16569000 | 0.02977600  | -2.31797300 |
| H | 1.05382600  | 0.25139100  | -2.64195400 | H | -1.05316200 | 0.25809700  | -2.64166000 |
| H | -0.42804300 | 0.72034200  | -2.65612000 | H | 0.43079000  | 0.72096700  | -2.65357300 |

**Table S53** Atomic coordinates (x,y,z) of [Sc(OH)(L<sup>021</sup>)]<sup>+</sup> isomers.

| [Sc(OH)(L <sup>021</sup> )] <sup>+</sup> Δ | [Sc(OH)(L <sup>021</sup> )] <sup>+</sup> Δ |
|--------------------------------------------|--------------------------------------------|
| Sc 0.00000000 0.00000000 0.00000000        | Sc 0.00000000 0.00000000 0.00000000        |
| N -0.77705600 1.06537200 2.11689900        | N 0.77720400 1.06343200 2.11917900         |
| C 0.26843200 1.62552800 3.02069200         | C -0.26817600 1.61985400 3.02534100        |
| C 1.60561100 1.83317600 2.32407200         | C -1.60582500 1.82739700 2.32982300        |
| N 1.97654900 0.60361000 1.60228700         | N -1.97538100 0.59896000 1.60562300        |
| C 2.32485200 -0.46603800 2.57922100        | C -2.32058400 -0.47360600 2.58047900       |
| C 1.66025200 -1.80379500 2.29927200        | C -1.65423600 -1.80981700 2.29707200       |
| N 0.24452500 -1.67784600 1.88211700        | N -0.23900400 -1.68111900 1.87902900       |
| C -0.63929200 -1.25943600 3.02153600       | C 0.64530700 -1.26383000 3.01853200        |
| C -1.52843000 -0.03862600 2.75056400       | C 1.53146400 -0.04033000 2.74973100        |
| H -1.97986100 0.27351200 3.71119100        | H 1.98291400 0.27060700 3.71074500         |
| H -2.34872400 -0.30432300 2.07171600       | H 2.35183800 -0.30262200 2.06967900        |
| H -0.00535100 -1.07075600 3.89714000       | H 0.01203900 -1.07893400 3.89545600        |
| H -1.30046600 -2.09339800 3.30294500       | H 1.30870900 -2.09708500 3.29671400        |
| C -0.16746700 -2.99673300 1.35349400       | C 0.17454100 -2.99827200 1.34711700        |
| C -1.47800600 -2.88393900 0.63910500       | C 1.48495900 -2.88180200 0.63294700        |
| C -2.42712900 -3.90807100 0.57797600       | C 2.43567600 -3.90431400 0.56856600        |
| C -3.61258000 -3.68460300 -0.12174000      | C 3.62064000 -3.67682300 -0.13066700       |
| C -3.83235500 -2.43590700 -0.71010400      | C 3.83854600 -2.42593700 -0.71519100       |
| C -2.84253400 -1.46649400 -0.58816900      | C 2.84717900 -1.45855000 -0.59021800       |
| N -1.68123900 -1.70067900 0.04628900       | C 2.99170800 -0.04478000 -1.08932100       |
| C -2.99056900 -0.05445100 -1.09157400      | O 4.00833300 0.28747900 -1.72585900        |
| O -4.00710800 0.27228900 -1.73105300       | O 2.01390100 0.72231400 -0.77707700        |
| O -2.01621500 0.71701500 -0.77943300       | N 1.68640300 -1.69658300 0.04361700        |
| H -4.75419800 -2.19873600 -1.23944000      | H 4.76000100 -2.18594800 -1.24394600       |
| H -4.36884500 -4.46854600 -0.18801300      | H 4.37804600 -4.45943000 -0.19962300       |
| H -2.23415400 -4.85591100 1.08128700       | H 2.24424300 -4.85404500 1.06890000        |
| H 0.59692000 -3.32469800 0.63183100        | H -0.58943800 -3.32535400 0.62461700       |
| H -0.21900900 -3.75688600 2.15178600       | H 0.22705500 -3.76031800 2.14353800        |
| H 1.74176900 -2.43750600 3.20184300        | H -1.73408500 -2.44538800 3.19848600       |
| H 2.18391100 -2.31774700 1.48804200        | H -2.17791000 -2.32297400 1.48534000       |
| H 2.05773500 -0.11952100 3.58413700        | H -2.05268700 -0.12894300 3.58582300       |
| H 3.41630300 -0.62020100 2.59569900        | H -3.41175300 -0.62964400 2.59801100       |
| C 3.08118800 0.83951100 0.66865800         | C -3.08141600 0.83521200 0.67387500        |
| C 3.13135900 -0.31768400 -0.31270300       | C -3.13025500 -0.31972600 -0.30987800      |
| O 2.08998300 -1.01553000 -0.45432700       | O -2.08725100 -1.01511900 -0.45364000      |
| N 4.24083600 -0.56514500 -1.00986800       | N -4.23766700 -0.57271000 -1.00810200      |
| C 4.27777600 -1.68369900 -1.95101700       | C -4.25439600 -1.68444800 -1.95857500      |
| H 3.58488300 -2.46812600 -1.62890200       | H -3.89682800 -1.35888500 -2.94924900      |
| H 4.00308600 -1.35018300 -2.96512200       | H -3.61751800 -2.49902000 -1.59665400      |
| H 5.29934000 -2.08646500 -1.97601900       | H -5.28692600 -2.04466600 -2.05506400      |
| C 5.42486100 0.29202000 -0.99016100        | C -5.42107400 0.28495600 -1.00765800       |
| H 5.74846900 0.46395000 -2.02703100        | H -5.23089300 1.23071200 -0.49225400       |

|   |             |             |             |   |             |             |             |
|---|-------------|-------------|-------------|---|-------------|-------------|-------------|
| H | 5.20782500  | 1.26452300  | -0.53851200 | H | -5.69123800 | 0.51286100  | -2.04952200 |
| H | 6.24847800  | -0.19198700 | -0.44219600 | H | -6.27052400 | -0.22751200 | -0.52997100 |
| H | 4.04015300  | 0.97420000  | 1.19459500  | H | -4.03966500 | 0.96666300  | 1.20189700  |
| H | 2.87672300  | 1.75733300  | 0.09404300  | H | -2.87953700 | 1.75490600  | 0.10142300  |
| H | 2.36695200  | 2.10381500  | 3.07968400  | H | -2.36721300 | 2.09551000  | 3.08632900  |
| H | 1.54910200  | 2.65178800  | 1.60013600  | H | -1.55059100 | 2.64766300  | 1.60763400  |
| H | 0.38971100  | 0.94986800  | 3.87433200  | H | -0.38805400 | 0.94171700  | 3.87722200  |
| H | -0.07211800 | 2.58452300  | 3.44116200  | H | 0.07142700  | 2.57816000  | 3.44809200  |
| C | -1.63726500 | 2.15708200  | 1.64071600  | C | 1.63501200  | 2.15759600  | 1.64407900  |
| C | -0.93283600 | 2.83573400  | 0.47252000  | C | 0.92897900  | 2.83642600  | 0.47737300  |
| O | 0.02063700  | 2.22580200  | -0.09634900 | O | -0.02427200 | 2.22633400  | -0.09184300 |
| N | -1.31737000 | 4.03903500  | 0.05694600  | N | 1.30897500  | 4.04036000  | 0.05941100  |
| C | -2.50306800 | 4.73483500  | 0.55314000  | C | 2.49825300  | 4.73828300  | 0.54308100  |
| H | -3.02032900 | 4.14811500  | 1.31733400  | H | 2.97440400  | 4.19492600  | 1.36377900  |
| H | -2.21930200 | 5.71012600  | 0.97591200  | H | 3.22338000  | 4.83378400  | -0.28008600 |
| H | -3.19734400 | 4.90322100  | -0.28426500 | H | 2.22522400  | 5.74587300  | 0.88946800  |
| C | -0.65937500 | 4.64003100  | -1.10478100 | C | 0.65276200  | 4.62135300  | -1.11414300 |
| H | -1.08313900 | 4.24130900  | -2.04067800 | H | 1.01592900  | 4.14511900  | -2.03908100 |
| H | -0.82093500 | 5.72450000  | -1.07177900 | H | -0.43345200 | 4.48671500  | -1.04746600 |
| H | 0.41605600  | 4.43040600  | -1.08099100 | H | 0.88563800  | 5.69224800  | -1.14548300 |
| H | -1.86103300 | 2.87178100  | 2.44735100  | H | 1.85813600  | 2.87143700  | 2.45152000  |
| H | -2.58561500 | 1.75215700  | 1.26642200  | H | 2.58398500  | 1.75531500  | 1.26859700  |
| O | 0.17766500  | -0.16842500 | -1.99159300 | O | -0.17476100 | -0.17042200 | -1.99251700 |
| H | 1.02788700  | -0.60136500 | -2.16965000 | H | -1.02694300 | -0.59969800 | -2.17012300 |



**Table S54** Atomic coordinates (x,y,z) of [Sc(L<sup>102</sup>)] isomers.

| [Sc(L <sup>102</sup> )] Δ             | [Sc(L <sup>102</sup> )] Δ             |
|---------------------------------------|---------------------------------------|
| Sc 0.00000000 0.00000000 0.00000000   | Sc 0.00000000 0.00000000 0.00000000   |
| N 0.05421900 -0.32354700 2.44259900   | N 0.76152600 2.07767200 1.11714600    |
| C -0.77990200 0.70236100 3.16071300   | C -0.25871800 3.04348800 1.61715900   |
| C -1.60079500 1.60739800 2.23402300   | C -1.63983100 2.81212700 1.03506700   |
| N -0.76148400 2.07774300 1.11705700   | N -1.99526500 1.38526100 1.10750000   |
| C 0.25874600 3.04355000 1.61717900    | C -2.20904300 0.95908100 2.51826000   |
| C 1.63989500 2.81218100 1.03520100    | C -1.46901200 -0.31753400 2.88886900  |
| N 1.99526900 1.38529400 1.10761300    | N -0.05431200 -0.32361700 2.44258600  |
| C 2.20907000 0.95906600 2.51834200    | C 0.77973500 0.70227700 3.16078700    |
| C 1.46887000 -0.31747100 2.88900100   | C 1.60073500 1.60725300 2.23415300    |
| H 1.52978400 -0.45972400 3.98359900   | H 1.99898000 2.44969600 2.82963800    |
| H 1.94898900 -1.18673600 2.42121400   | H 2.45647500 1.06859400 1.81281300    |
| H 1.90724000 1.77574800 3.18485900    | H 0.11494600 1.30806200 3.78755600    |
| H 3.28203200 0.79664700 2.71011000    | H 1.46881800 0.19654200 3.85308000    |
| C 3.19082600 1.12777100 0.29349000    | C 0.50287800 -1.67152700 2.69990400   |
| C 3.33859900 -0.34776900 0.07610300   | C 1.83428700 -1.78919900 2.02155700   |
| C 4.56194300 -1.02073900 0.11185700   | C 2.90092700 -2.56588700 2.47996100   |
| C 4.58421400 -2.39840400 -0.10717900  | C 4.06648900 -2.62164100 1.71384500   |
| C 3.38417300 -3.06547700 -0.36083200  | C 4.12823800 -1.91775800 0.50783500   |
| C 2.20977900 -2.31999200 -0.38822500  | C 3.01656200 -1.17496700 0.12224200   |
| N 2.18639700 -0.99366400 -0.16774900  | C 2.90429700 -0.44804100 -1.19179000  |
| C 0.86088600 -2.91605000 -0.69278400  | O 3.88094500 -0.39061100 -1.95839500  |
| O 0.73528000 -4.14087800 -0.84304300  | O 1.74106100 0.05251900 -1.41706900   |
| O -0.08389600 -2.04506400 -0.78623700 | N 1.91200900 -1.09957800 0.87817700   |
| H 3.34276000 -4.13899200 -0.53970400  | H 5.00764400 -1.94445600 -0.13440000  |
| H 5.52713500 -2.94660200 -0.07626500  | H 4.91802400 -3.21479400 2.05112600   |
| H 5.47668600 -0.46485000 0.31876800   | H 2.81213000 -3.11163400 3.41962200   |
| H 3.04681600 1.61096000 -0.68551000   | H -0.17994600 -2.41584900 2.25885900  |
| H 4.10310500 1.55148600 0.74818400    | H 0.57781000 -1.87965800 3.77994700   |
| H 2.37048000 3.43570500 1.58498300    | H -1.53001700 -0.45988600 3.98344900  |
| H 1.67546600 3.11197600 -0.01678500   | H -1.94912300 -1.18674100 2.42096700  |
| H 0.29685300 2.97353100 2.70926100    | H -1.90703300 1.77572800 3.18473700   |
| H -0.06260600 4.07269500 1.39084400   | H -3.28202200 0.79686400 2.71009600   |
| C -1.49246500 2.68256600 -0.00648600  | C -3.19085600 1.12773700 0.29345100   |
| C -0.63768500 2.59929800 -1.27934700  | C -3.33854500 -0.34780600 0.07599700  |
| O -0.84343500 3.37991100 -2.21671600  | C -4.56187300 -1.02082700 0.11169300  |
| O 0.26741900 1.66516000 -1.28573700   | C -4.58407000 -2.39849100 -0.10732500 |
| H -1.77017600 3.73151700 0.18912800   | C -3.38398800 -3.06552200 -0.36092600 |
| H -2.41399200 2.11458200 -0.19321300  | C -2.20963000 -2.31998500 -0.38831900 |
| H -1.99900000 2.44987400 2.82948400   | N -2.18632700 -0.99364800 -0.16783800 |
| H -2.45655700 1.06881300 1.81263500   | C -0.86070900 -2.91594200 -0.69291000 |
| H -0.11518900 1.30811000 3.78759200   | O -0.73498600 -4.14078400 -0.84300800 |
| H -1.46906900 0.19661600 3.85291600   | O 0.08394600 -2.04485500 -0.78665400  |

|   |             |             |             |   |             |             |             |
|---|-------------|-------------|-------------|---|-------------|-------------|-------------|
| C | -0.50305200 | -1.67142300 | 2.69996800  | H | -3.34253400 | -4.13904000 | -0.53976700 |
| C | -1.83440900 | -1.78905600 | 2.02151400  | H | -5.52696400 | -2.94673700 | -0.07644400 |
| C | -2.90113500 | -2.56567000 | 2.47983900  | H | -5.47664700 | -0.46497100 | 0.31856000  |
| C | -4.06663000 | -2.62138400 | 1.71361600  | H | -4.10313400 | 1.55134200  | 0.74825000  |
| C | -4.12822800 | -1.91754400 | 0.50757200  | H | -3.04698600 | 1.61101900  | -0.68552500 |
| C | -3.01647200 | -1.17482600 | 0.12206100  | H | -2.37044500 | 3.43570800  | 1.58474700  |
| N | -1.91199900 | -1.09946200 | 0.87810800  | H | -1.67525100 | 3.11186900  | -0.01694000 |
| C | -2.90403400 | -0.44799800 | -1.19201500 | H | -0.29687900 | 2.97353000  | 2.70925100  |
| O | -3.88061600 | -0.39048200 | -1.95866900 | H | 0.06261500  | 4.07263000  | 1.39078100  |
| O | -1.74071900 | 0.05247000  | -1.41724300 | C | 1.49267000  | 2.68246400  | -0.00630600 |
| H | -5.00756700 | -1.94421600 | -0.13475700 | C | 0.63812500  | 2.59912600  | -1.27930800 |
| H | -4.91822800 | -3.21447400 | 2.05084700  | O | 0.84424600  | 3.37945000  | -2.21682800 |
| H | -2.81246600 | -3.11138300 | 3.41953100  | O | -0.26712400 | 1.66511900  | -1.28567200 |
| H | -0.57809100 | -1.87945000 | 3.78002400  | H | 1.77034900  | 3.73142100  | 0.18933600  |
| H | 0.17977400  | -2.41581500 | 2.25904800  | H | 2.41424300  | 2.11450500  | -0.19287300 |

**Table S55** Atomic coordinates (x,y,z) of [ScF(L<sup>102</sup>)]<sup>-</sup> isomers.

| [ScF(L <sup>102</sup> )] <sup>-</sup> Δ |             |             |             | [ScF(L <sup>102</sup> )] <sup>-</sup> Λ |             |             |             |
|-----------------------------------------|-------------|-------------|-------------|-----------------------------------------|-------------|-------------|-------------|
| Sc                                      | 0.00000000  | 0.00000000  | 0.00000000  | Sc                                      | 0.00000000  | 0.00000000  | 0.00000000  |
| N                                       | 0.17648800  | -0.52597700 | 2.74970400  | N                                       | 1.30411400  | 1.67281300  | 1.63272000  |
| C                                       | -0.79118400 | 0.23623600  | 3.58417500  | C                                       | 0.48001900  | 2.83165000  | 2.08503000  |
| C                                       | -1.87180700 | 0.95791800  | 2.78539200  | C                                       | -0.90796600 | 2.92891200  | 1.45621200  |
| N                                       | -1.30416300 | 1.67222800  | 1.63296800  | N                                       | -1.59282300 | 1.62816900  | 1.44307300  |
| C                                       | -0.48017500 | 2.83122600  | 2.08507000  | C                                       | -1.95122300 | 1.19300200  | 2.82202200  |
| C                                       | 0.90772000  | 2.92868800  | 1.45606000  | C                                       | -1.55791800 | -0.24268600 | 3.15391800  |
| N                                       | 1.59275800  | 1.62802900  | 1.44284800  | N                                       | -0.17589100 | -0.52559600 | 2.74982900  |
| C                                       | 1.95144600  | 1.19293900  | 2.82174500  | C                                       | 0.79178600  | 0.23685600  | 3.58408100  |
| C                                       | 1.55850700  | -0.24283800 | 3.15364500  | C                                       | 1.87215100  | 0.95865400  | 2.78504000  |
| H                                       | 1.70432100  | -0.39850000 | 4.24186300  | H                                       | 2.40535700  | 1.65191700  | 3.46578600  |
| H                                       | 2.21034600  | -0.95640200 | 2.63763000  | H                                       | 2.61461400  | 0.25005900  | 2.40343900  |
| H                                       | 1.47787200  | 1.87694800  | 3.53615000  | H                                       | 0.23605100  | 0.96394500  | 4.18821400  |
| H                                       | 3.03691700  | 1.30161100  | 2.98031300  | H                                       | 1.28308900  | -0.43618200 | 4.30674400  |
| C                                       | 2.80225100  | 1.67507700  | 0.61040200  | C                                       | 0.11708700  | -1.95816900 | 2.83177300  |
| C                                       | 3.29821500  | 0.27059100  | 0.39694400  | C                                       | 1.43708000  | -2.23098800 | 2.16629400  |
| C                                       | 4.64895700  | -0.08440100 | 0.36096900  | C                                       | 2.35908700  | -3.16510200 | 2.64574100  |
| C                                       | 4.98943600  | -1.42102600 | 0.14443900  | C                                       | 3.55561300  | -3.35347300 | 1.95217800  |
| C                                       | 3.97314400  | -2.35881600 | -0.04705900 | C                                       | 3.78837800  | -2.61488800 | 0.79115300  |
| C                                       | 2.65100200  | -1.91814900 | -0.00855300 | C                                       | 2.80828400  | -1.71433000 | 0.37530100  |
| N                                       | 2.32857400  | -0.63985000 | 0.23205800  | C                                       | 2.90800600  | -0.93533800 | -0.91242300 |
| C                                       | 1.47708800  | -2.82421200 | -0.29454600 | O                                       | 3.98047500  | -0.92560200 | -1.54592200 |
| O                                       | 1.67009900  | -4.04903300 | -0.43296000 | O                                       | 1.82488300  | -0.34298600 | -1.26410900 |
| O                                       | 0.34861700  | -2.22756000 | -0.39319300 | N                                       | 1.67534900  | -1.51189500 | 1.06061500  |
| H                                       | 4.18324900  | -3.41137200 | -0.23250000 | H                                       | 4.69886900  | -2.73027300 | 0.20477500  |
| H                                       | 6.03693600  | -1.72646800 | 0.12290900  | H                                       | 4.29610400  | -4.06933700 | 2.31312400  |
| H                                       | 5.41419600  | 0.67832900  | 0.50901200  | H                                       | 2.13787200  | -3.72547300 | 3.55490700  |
| H                                       | 2.53717600  | 2.11106600  | -0.36606000 | H                                       | -0.67155400 | -2.51024700 | 2.29761500  |
| H                                       | 3.59361300  | 2.30529200  | 1.05537400  | H                                       | 0.13083700  | -2.32409400 | 3.87545500  |
| H                                       | 1.49128400  | 3.68403300  | 2.01943700  | H                                       | -1.70356800 | -0.39833200 | 4.24216100  |
| H                                       | 0.83177700  | 3.26755600  | 0.41875400  | H                                       | -2.20967800 | -0.95640300 | 2.63800800  |
| H                                       | -0.38507200 | 2.78391600  | 3.17702400  | H                                       | -1.47771700 | 1.87713300  | 3.53636200  |
| H                                       | -1.01432700 | 3.77264900  | 1.87441200  | H                                       | -3.03670000 | 1.30141700  | 2.98073600  |
| C                                       | -2.35576000 | 2.13278200  | 0.72469800  | C                                       | -2.80239600 | 1.67513500  | 0.61076100  |
| C                                       | -1.74039000 | 2.54003500  | -0.61035000 | C                                       | -3.29832300 | 0.27064900  | 0.39727100  |
| O                                       | -2.37138700 | 3.30260400  | -1.37006300 | C                                       | -4.64906300 | -0.08433200 | 0.36114600  |
| O                                       | -0.58987000 | 2.03044000  | -0.86241000 | C                                       | -4.98953100 | -1.42093600 | 0.14449000  |
| H                                       | -2.93899500 | 2.97470300  | 1.14160100  | C                                       | -3.97322700 | -2.35873300 | -0.04691500 |
| H                                       | -3.05782800 | 1.30648700  | 0.53508300  | C                                       | -2.65108400 | -1.91807400 | -0.00821500 |
| H                                       | -2.40498700 | 1.65106700  | 3.46627500  | N                                       | -2.32867100 | -0.63978700 | 0.23243500  |
| H                                       | -2.61424000 | 0.24922900  | 2.40391200  | C                                       | -1.47715200 | -2.82415900 | -0.29393800 |
| H                                       | -0.23547100 | 0.96336100  | 4.18828000  | O                                       | -1.67025700 | -4.04890100 | -0.43299800 |
| H                                       | -1.28225400 | -0.43694400 | 4.30686800  | O                                       | -0.34860400 | -2.22759000 | -0.39229800 |

|   |             |             |             |   |             |             |             |
|---|-------------|-------------|-------------|---|-------------|-------------|-------------|
| C | -0.11620900 | -1.95860500 | 2.83159000  | H | -4.18333900 | -3.41127400 | -0.23242000 |
| C | -1.43622600 | -2.23162100 | 2.16624900  | H | -6.03703600 | -1.72635200 | 0.12279800  |
| C | -2.35801000 | -3.16593300 | 2.64575300  | H | -5.41431200 | 0.67840200  | 0.50911200  |
| C | -3.55460400 | -3.35443300 | 1.95234900  | H | -3.59376200 | 2.30530400  | 1.05579800  |
| C | -3.78765500 | -2.61576900 | 0.79143100  | H | -2.53743400 | 2.11115800  | -0.36571800 |
| C | -2.80777600 | -1.71500700 | 0.37552100  | H | -1.49155400 | 3.68416800  | 2.01969200  |
| N | -1.67475200 | -1.51247000 | 1.06067400  | H | -0.83223000 | 3.26785300  | 0.41891200  |
| C | -2.90792800 | -0.93579200 | -0.91204900 | H | 0.38506000  | 2.78421200  | 3.17699300  |
| O | -3.98038900 | -0.92657500 | -1.54555900 | H | 1.01400100  | 3.77317100  | 1.87437800  |
| O | -1.82493800 | -0.34335200 | -1.26394500 | C | 2.35532900  | 2.13354200  | 0.72410700  |
| H | -4.69823300 | -2.73120200 | 0.20519600  | C | 1.73948400  | 2.54047000  | -0.61081300 |
| H | -4.29495000 | -4.07042200 | 2.31334500  | O | 2.37004300  | 3.30317600  | -1.37076500 |
| H | -2.13658000 | -3.72632600 | 3.55485200  | O | 0.58908000  | 2.03046400  | -0.86260100 |
| H | -0.12976300 | -2.32459300 | 3.87525100  | H | 2.93846800  | 2.97566500  | 1.14073900  |
| H | 0.67248400  | -2.51050000 | 2.29731500  | H | 3.05756700  | 1.30741300  | 0.53439000  |
| F | 0.85323000  | 0.11578800  | -1.76461400 | F | -0.85332900 | 0.11506800  | -1.76463200 |

**Table S56** Atomic coordinates (x,y,z) of [Sc(OH)(L<sup>102</sup>)]<sup>-</sup> isomers.

| [Sc(OH)(L <sup>102</sup> )] <sup>-</sup> Δ |             |             |             | [Sc(OH)(L <sup>102</sup> )] <sup>-</sup> Λ |             |             |             |
|--------------------------------------------|-------------|-------------|-------------|--------------------------------------------|-------------|-------------|-------------|
| Sc                                         | 0.00000000  | 0.00000000  | 0.00000000  | Sc                                         | 0.00000000  | 0.00000000  | 0.00000000  |
| N                                          | 0.21758500  | -0.58811100 | 2.72302400  | N                                          | 1.30352900  | 1.61196700  | 1.64207300  |
| C                                          | -0.75222500 | 0.15172400  | 3.57472200  | C                                          | 0.48359900  | 2.77421200  | 2.09971900  |
| C                                          | -1.84548900 | 0.87489400  | 2.79578100  | C                                          | -0.90036500 | 2.88964900  | 1.46519800  |
| N                                          | -1.30351500 | 1.61196200  | 1.64209500  | N                                          | -1.60128700 | 1.59733300  | 1.44116000  |
| C                                          | -0.48358800 | 2.77422000  | 2.09971800  | C                                          | -1.96895000 | 1.15189800  | 2.81372500  |
| C                                          | 0.90036100  | 2.88966300  | 1.46517400  | C                                          | -1.59831600 | -0.29434100 | 3.12451400  |
| N                                          | 1.60130700  | 1.59736400  | 1.44118800  | N                                          | -0.21753700 | -0.58814300 | 2.72297000  |
| C                                          | 1.96894300  | 1.15196700  | 2.81377300  | C                                          | 0.75228100  | 0.15168700  | 3.57467400  |
| C                                          | 1.59835300  | -0.29428300 | 3.12456900  | C                                          | 1.84552800  | 0.87487700  | 2.79573300  |
| H                                          | 1.75182900  | -0.46626700 | 4.20922600  | H                                          | 2.37618400  | 1.55576100  | 3.49049300  |
| H                                          | 2.25723100  | -0.99001600 | 2.59325600  | H                                          | 2.58667300  | 0.16463900  | 2.41504600  |
| H                                          | 1.48522900  | 1.81872700  | 3.53747700  | H                                          | 0.20036400  | 0.87447200  | 4.18738300  |
| H                                          | 3.05275400  | 1.27586200  | 2.97242400  | H                                          | 1.23297300  | -0.53746300 | 4.28935200  |
| C                                          | 2.80696000  | 1.65990900  | 0.60460000  | C                                          | 0.05634100  | -2.02577500 | 2.78405600  |
| C                                          | 3.30301200  | 0.25993500  | 0.36647000  | C                                          | 1.37851600  | -2.31158400 | 2.12680700  |
| C                                          | 4.65329400  | -0.09467500 | 0.32076800  | C                                          | 2.26901300  | -3.28502800 | 2.58800300  |
| C                                          | 4.99342300  | -1.42706100 | 0.07700100  | C                                          | 3.46661200  | -3.48692200 | 1.89999300  |
| C                                          | 3.97713800  | -2.36128900 | -0.13081600 | C                                          | 3.73230600  | -2.72150900 | 0.76343600  |
| C                                          | 2.65541800  | -1.92006300 | -0.08177200 | C                                          | 2.78209900  | -1.78185100 | 0.36496400  |
| N                                          | 2.33324800  | -0.64752000 | 0.18446600  | C                                          | 2.91644000  | -0.96740600 | -0.89767400 |
| C                                          | 1.47685000  | -2.81368400 | -0.38522100 | O                                          | 3.99689100  | -0.96844100 | -1.51886700 |
| O                                          | 1.65793600  | -4.03862100 | -0.53424500 | O                                          | 1.85451900  | -0.33609800 | -1.24305100 |
| O                                          | 0.35575900  | -2.20276400 | -0.48763600 | N                                          | 1.64827500  | -1.56849000 | 1.04490500  |
| H                                          | 4.18702800  | -3.40986600 | -0.33793800 | H                                          | 4.64536600  | -2.84561100 | 0.18275300  |
| H                                          | 6.04102200  | -1.73144500 | 0.04663900  | H                                          | 4.18259400  | -4.23431900 | 2.24623200  |
| H                                          | 5.41914900  | 0.66484400  | 0.48167600  | H                                          | 2.02295900  | -3.86586600 | 3.47778200  |
| H                                          | 2.53542100  | 2.10704600  | -0.36465600 | H                                          | -0.73593400 | -2.55805300 | 2.23460600  |
| H                                          | 3.59877200  | 2.28459600  | 1.05626800  | H                                          | 0.05361600  | -2.40863100 | 3.82184600  |
| H                                          | 1.47695500  | 3.65005900  | 2.02905700  | H                                          | -1.75179600 | -0.46633500 | 4.20916800  |
| H                                          | 0.81264600  | 3.23163500  | 0.42953800  | H                                          | -2.25717600 | -0.99008600 | 2.59319200  |
| H                                          | -0.38377900 | 2.71904000  | 3.19111100  | H                                          | -1.48529400 | 1.81867100  | 3.53745200  |
| H                                          | -1.02588300 | 3.71257700  | 1.89826100  | H                                          | -3.05277200 | 1.27575200  | 2.97233300  |
| C                                          | -2.39192700 | 2.07949600  | 0.77776100  | C                                          | -2.80694300 | 1.65988900  | 0.60458100  |
| C                                          | -1.84252700 | 2.52332100  | -0.57304000 | C                                          | -3.30300200 | 0.25991800  | 0.36645200  |
| O                                          | -2.54321700 | 3.24736700  | -1.30915500 | C                                          | -4.65328500 | -0.09468700 | 0.32073500  |
| O                                          | -0.67309400 | 2.08332400  | -0.86120100 | C                                          | -4.99341500 | -1.42706900 | 0.07695400  |
| H                                          | -2.96925900 | 2.90325300  | 1.23670100  | C                                          | -3.97713100 | -2.36129900 | -0.13086300 |
| H                                          | -3.09128600 | 1.24892100  | 0.59848000  | C                                          | -2.65541000 | -1.92007900 | -0.08180400 |
| H                                          | -2.37613100 | 1.55579500  | 3.49053500  | N                                          | -2.33324100 | -0.64754100 | 0.18445400  |
| H                                          | -2.58664400 | 0.16464700  | 2.41512900  | C                                          | -1.47684400 | -2.81368900 | -0.38528400 |
| H                                          | -0.20028900 | 0.87452500  | 4.18739800  | O                                          | -1.65791100 | -4.03863800 | -0.53423900 |
| H                                          | -1.23289800 | -0.53741000 | 4.28942700  | O                                          | -0.35574500 | -2.20277200 | -0.48764400 |
| C                                          | -0.05627800 | -2.02574600 | 2.78410700  | H                                          | -4.18702700 | -3.40987200 | -0.33800300 |

|   |             |             |             |   |             |             |             |
|---|-------------|-------------|-------------|---|-------------|-------------|-------------|
| C | -1.37845300 | -2.31157100 | 2.12686300  | H | -6.04101500 | -1.73144900 | 0.04658000  |
| C | -2.26894000 | -3.28501400 | 2.58808000  | H | -5.41913900 | 0.66483500  | 0.48163800  |
| C | -3.46654800 | -3.48692200 | 1.90009000  | H | -3.59874700 | 2.28457600  | 1.05626300  |
| C | -3.73226200 | -2.72152400 | 0.76352900  | H | -2.53540600 | 2.10703400  | -0.36467200 |
| C | -2.78206300 | -1.78186900 | 0.36503100  | H | -1.47697200 | 3.65001100  | 2.02911300  |
| N | -1.64822900 | -1.56849300 | 1.04495100  | H | -0.81266900 | 3.23166000  | 0.42957500  |
| C | -2.91644700 | -0.96741900 | -0.89760200 | H | 0.38381200  | 2.71901900  | 3.19111300  |
| O | -3.99689800 | -0.96850700 | -1.51879200 | H | 1.02588400  | 3.71257700  | 1.89826800  |
| O | -1.85452900 | -0.33613200 | -1.24302500 | C | 2.39192400  | 2.07950700  | 0.77772300  |
| H | -4.64533300 | -2.84562700 | 0.18286400  | C | 1.84250500  | 2.52333600  | -0.57306600 |
| H | -4.18252300 | -4.23431600 | 2.24635000  | O | 2.54320100  | 3.24735400  | -1.30920500 |
| H | -2.02287400 | -3.86583700 | 3.47786500  | O | 0.67306100  | 2.08335400  | -0.86120500 |
| H | -0.05354400 | -2.40860800 | 3.82189500  | H | 2.96926100  | 2.90326600  | 1.23665300  |
| H | 0.73600000  | -2.55801200 | 2.23465300  | H | 3.09128500  | 1.24893400  | 0.59842800  |
| O | 0.86205100  | 0.25612000  | -1.83096700 | O | -0.86206400 | 0.25613700  | -1.83096300 |
| H | 0.36812400  | 1.01415900  | -2.18329700 | H | -0.36815300 | 1.01419800  | -2.18326800 |

**Table S57** Atomic coordinates (x,y,z) of [Sc(L<sup>012</sup>)]<sup>+</sup> isomers.

| [Sc(L <sup>012</sup> )] <sup>+</sup> Δ |             |             |             | [Sc(L <sup>012</sup> )] <sup>+</sup> Λ |             |             |             |
|----------------------------------------|-------------|-------------|-------------|----------------------------------------|-------------|-------------|-------------|
| Sc                                     | 0.00000000  | 0.00000000  | 0.00000000  | Sc                                     | 0.00000000  | 0.00000000  | 0.00000000  |
| N                                      | 0.64757900  | -0.91819700 | 2.16082400  | N                                      | 1.54353200  | 0.88464300  | 1.75560500  |
| C                                      | -0.43542400 | -0.77719900 | 3.19748500  | C                                      | 1.10051800  | 2.06680600  | 2.55379000  |
| C                                      | -1.77265600 | -0.26815400 | 2.64934600  | C                                      | -0.06078300 | 2.81398000  | 1.92827400  |
| N                                      | -1.54374100 | 0.88408800  | 1.75610600  | N                                      | -1.10744700 | 1.87444100  | 1.48456300  |
| C                                      | -1.10087700 | 2.06661800  | 2.55389100  | C                                      | -1.79430200 | 1.25543800  | 2.65620600  |
| C                                      | 0.06032800  | 2.81387900  | 1.92825000  | C                                      | -1.91259900 | -0.25927600 | 2.56928100  |
| N                                      | 1.10718000  | 1.87454200  | 1.48457100  | N                                      | -0.64729400 | -0.91838600 | 2.16045000  |
| C                                      | 1.79428400  | 1.25575100  | 2.65620400  | C                                      | 0.43597200  | -0.77738700 | 3.19684800  |
| C                                      | 1.91284800  | -0.25896600 | 2.56945000  | C                                      | 1.77294800  | -0.26778700 | 2.64850100  |
| H                                      | 2.25241800  | -0.64623600 | 3.54715000  | H                                      | 2.42126500  | 0.00192700  | 3.50213600  |
| H                                      | 2.66861400  | -0.54248700 | 1.82538500  | H                                      | 2.28844100  | -1.04551000 | 2.07576000  |
| H                                      | 1.25613700  | 1.53938900  | 3.56859900  | H                                      | 0.07144300  | -0.10995900 | 3.98581500  |
| H                                      | 2.80913400  | 1.67020100  | 2.76362300  | H                                      | 0.60935300  | -1.74942500 | 3.68099500  |
| C                                      | 2.06770800  | 2.59537800  | 0.63231700  | C                                      | -0.91820400 | -2.35922200 | 1.93912100  |
| C                                      | 2.92880000  | 1.61468600  | -0.10227900 | C                                      | 0.27197900  | -2.97596900 | 1.26710800  |
| C                                      | 4.29549900  | 1.79247600  | -0.32837400 | C                                      | 0.69077500  | -4.29884200 | 1.42406800  |
| C                                      | 4.99850500  | 0.81284000  | -1.03010200 | C                                      | 1.78705700  | -4.74598000 | 0.68387500  |
| C                                      | 4.31812000  | -0.31894300 | -1.48436200 | C                                      | 2.42067700  | -3.87072700 | -0.20309700 |
| C                                      | 2.95578500  | -0.41701000 | -1.22116900 | C                                      | 1.93319300  | -2.57134600 | -0.30399700 |
| N                                      | 2.27764400  | 0.52818200  | -0.54729300 | C                                      | 2.44274600  | -1.55126500 | -1.28751200 |
| C                                      | 2.10800700  | -1.57755400 | -1.66689300 | O                                      | 3.44466100  | -1.79474100 | -1.97875400 |
| O                                      | 2.62149800  | -2.54393400 | -2.24818000 | O                                      | 1.74257200  | -0.47002500 | -1.33363400 |
| O                                      | 0.85456600  | -1.44528500 | -1.39074700 | N                                      | 0.90328900  | -2.13902100 | 0.43634400  |
| H                                      | 4.81815800  | -1.11764200 | -2.03044600 | H                                      | 3.26505300  | -4.17994200 | -0.81789300 |
| H                                      | 6.06809900  | 0.92695300  | -1.21335200 | H                                      | 2.13983100  | -5.77288000 | 0.79153200  |
| H                                      | 4.79332600  | 2.68429100  | 0.05278400  | H                                      | 0.16416700  | -4.95887100 | 2.11374800  |
| H                                      | 1.49548100  | 3.17612300  | -0.10762400 | H                                      | -1.78503800 | -2.44634700 | 1.26404200  |
| H                                      | 2.68330400  | 3.30325300  | 1.21306300  | H                                      | -1.16668100 | -2.87280300 | 2.88188700  |
| H                                      | 0.46078400  | 3.53465900  | 2.66538200  | H                                      | -2.25205700 | -0.64673200 | 3.54694500  |
| H                                      | -0.26627100 | 3.38662700  | 1.05474000  | H                                      | -2.66837900 | -0.54279700 | 1.82523000  |
| H                                      | -0.82685400 | 1.72329400  | 3.55665700  | H                                      | -1.25610500 | 1.53905700  | 3.56857100  |
| H                                      | -1.94579700 | 2.75933800  | 2.69167200  | H                                      | -2.80922200 | 1.66967400  | 2.76378100  |
| C                                      | -2.70498900 | 1.25445400  | 0.93480400  | C                                      | -2.06816000 | 2.59511800  | 0.63241700  |
| C                                      | -2.18364100 | 2.01407400  | -0.28017900 | C                                      | -2.92883400 | 1.61435600  | -0.10253500 |
| O                                      | -0.96606100 | 1.85771200  | -0.60615500 | C                                      | -4.29550600 | 1.79202500  | -0.32888500 |
| N                                      | -2.98788000 | 2.81713300  | -0.96362300 | C                                      | -4.99823400 | 0.81252200  | -1.03105900 |
| C                                      | -2.48008800 | 3.58329000  | -2.10275900 | C                                      | -4.31758400 | -0.31902100 | -1.48550500 |
| H                                      | -1.39687100 | 3.71282600  | -2.01301900 | C                                      | -2.95529900 | -0.41700500 | -1.22201400 |
| H                                      | -2.71145700 | 3.06705800  | -3.04786500 | N                                      | -2.27740000 | 0.52805600  | -0.54768300 |
| H                                      | -2.96770000 | 4.56746300  | -2.10578900 | C                                      | -2.10736600 | -1.57733300 | -1.66796500 |
| C                                      | -4.41449900 | 2.96547800  | -0.66871500 | O                                      | -2.62074100 | -2.54353700 | -2.24969500 |
| H                                      | -4.94919500 | 3.08512700  | -1.62031800 | O                                      | -0.85400200 | -1.44512000 | -1.39155200 |

|   |             |             |             |   |             |             |             |
|---|-------------|-------------|-------------|---|-------------|-------------|-------------|
| H | -4.81135200 | 2.07675300  | -0.16784600 | H | -4.81738600 | -1.11759800 | -2.03197700 |
| H | -4.59668000 | 3.85582700  | -0.04693700 | H | -6.06779800 | 0.92655400  | -1.21453100 |
| H | -3.43009600 | 1.85328500  | 1.50644200  | H | -4.79352400 | 2.68367200  | 0.05241900  |
| H | -3.21682900 | 0.34971900  | 0.57832600  | H | -2.68407300 | 3.30263300  | 1.21327100  |
| H | -2.42084300 | 0.00161900  | 3.50306200  | H | -1.49607200 | 3.17624600  | -0.10733000 |
| H | -2.28808500 | -1.04616400 | 2.07694000  | H | -0.46136000 | 3.53463900  | 2.66545900  |
| H | -0.07088200 | -0.10936900 | 3.98609700  | H | 0.26570500  | 3.38684600  | 1.05480100  |
| H | -0.60836200 | -1.74912400 | 3.68202500  | H | 0.82650100  | 1.72308900  | 3.55642200  |
| C | 0.91841100  | -2.35904000 | 1.93951200  | H | 1.94533600  | 2.75960100  | 2.69182500  |
| C | -0.27193900 | -2.97578800 | 1.26777600  | C | 2.70443600  | 1.25560700  | 0.93405700  |
| C | -0.69087300 | -4.29856200 | 1.42514800  | C | 2.18256000  | 2.01494800  | -0.28091400 |
| C | -1.78728200 | -4.74579900 | 0.68519100  | O | 0.96497300  | 1.85807300  | -0.60669700 |
| C | -2.42085000 | -3.87074900 | -0.20200400 | N | 2.98631600  | 2.81830500  | -0.96458400 |
| C | -1.93322600 | -2.57144800 | -0.30332900 | C | 4.41297100  | 2.96732000  | -0.67022200 |
| N | -0.90325900 | -2.13899600 | 0.43684200  | H | 4.81015700  | 2.07940000  | -0.16821300 |
| C | -2.44266700 | -1.55167400 | -1.28724800 | H | 4.94743100  | 3.08579200  | -1.62211700 |
| O | -3.44462900 | -1.79528700 | -1.97836100 | H | 4.59508000  | 3.85858200  | -0.04973500 |
| O | -1.74234900 | -0.47054000 | -1.33381900 | C | 2.47799300  | 3.58415100  | -2.10368400 |
| H | -3.26528000 | -4.18005400 | -0.81668400 | H | 2.70998600  | 3.06821700  | -3.04879800 |
| H | -2.14017300 | -5.77262200 | 0.79319300  | H | 1.39465200  | 3.71271600  | -2.01409800 |
| H | -0.16427600 | -4.95845600 | 2.11496500  | H | 2.96475100  | 4.56875400  | -2.10654800 |
| H | 1.16705700  | -2.87260200 | 2.88224400  | H | 3.42931000  | 1.85481400  | 1.50559000  |
| H | 1.78509300  | -2.44620600 | 1.26423900  | H | 3.21666100  | 0.35112700  | 0.57750600  |



**Table S58** Atomic coordinates (x,y,z) of [ScF(L<sup>012</sup>)] isomers.

| [ScF(L <sup>012</sup> )] Δ            | [ScF(L <sup>012</sup> )] Λ           |
|---------------------------------------|--------------------------------------|
| Sc 0.00000000 0.00000000 0.00000000   | Sc 0.00000000 0.00000000 0.00000000  |
| N -0.77484600 0.67278200 2.34824900   | N -1.71232600 -0.81189700 1.76531600 |
| C 0.26592600 0.46912600 3.39784800    | C -1.32718800 -2.16421500 2.29250600 |
| C 1.66117300 0.19227600 2.86490000    | C -0.19506200 -2.84543000 1.53354800 |
| N 1.71236800 -0.81189900 1.76543100   | N 0.96662700 -1.96355800 1.30493900  |
| C 1.32725500 -2.16416800 2.29276100   | C 1.67521200 -1.60677600 2.56795900  |
| C 0.19515200 -2.84546600 1.53384700   | C 1.97684400 -0.11613500 2.67561000  |
| N -0.96651500 -1.96361100 1.30512700  | N 0.77490600 0.67276000 2.34820900   |
| C -1.67513400 -1.60674400 2.56809100  | C -0.26587000 0.46908000 3.39780400  |
| C -1.97678400 -0.11610000 2.67565100  | C -1.66111500 0.19220200 2.86486900  |
| H -2.33437200 0.10628600 3.69868300   | H -2.28685300 -0.14808800 3.71149100 |
| H -2.77265700 0.17730200 1.98123300   | H -2.11429400 1.11344200 2.48653900  |
| H -1.06535600 -1.93449000 3.41783100  | H 0.05086000 -0.35024700 4.05128600  |
| H -2.62119600 -2.16493300 2.64423700  | H -0.32333300 1.35934800 4.04446700  |
| C -1.92432700 -2.60838700 0.38576500  | C 1.09422700 2.10811500 2.22465200   |
| C -2.87571200 -1.56853000 -0.13564100 | C -0.09374500 2.82549500 1.63957300  |
| C -4.23844000 -1.77210100 -0.36474900 | C -0.47773600 4.12833800 1.96604500  |
| C -4.99934700 -0.72153500 -0.88371600 | C -1.59538200 4.67778100 1.33330700  |
| C -4.37874000 0.49366700 -1.18466000  | C -2.29369100 3.92108500 0.38805100  |
| C -3.01274200 0.60735000 -0.93983900  | C -1.84023900 2.63284000 0.11590200  |
| N -2.29685300 -0.38933800 -0.40241100 | C -2.45475400 1.71712500 -0.91609300 |
| C -2.17918500 1.80629600 -1.31800400  | O -3.47367600 2.07436100 -1.53333100 |
| O -2.72193900 2.84706100 -1.72108600  | O -1.83255600 0.60115400 -1.07680400 |
| O -0.90880000 1.61228000 -1.20551900  | N -0.77997300 2.10707200 0.74257800  |
| H -4.92491700 1.33377900 -1.61195700  | H -3.16664400 4.31114400 -0.13372800 |
| H -6.06821300 -0.85350900 -1.05997200 | H -1.92029400 5.69050600 1.57750100  |
| H -4.69052300 -2.73693400 -0.13321800 | H 0.08714400 4.69376200 2.70782800   |
| H -1.36180600 -3.01278200 -0.46683400 | H 1.94812500 2.21500700 1.53619500   |
| H -2.46481400 -3.43689900 0.87350300  | H 1.38461900 2.55057100 3.19323600   |
| H -0.09928900 -3.75566900 2.09111400  | H 2.33441000 0.10621600 3.69865800   |
| H 0.55625200 -3.15261400 0.54730800   | H 2.77272800 0.17730400 1.98122400   |
| H 1.06553900 -2.06225700 3.35448300   | H 1.06540100 -1.93458800 3.41764400  |
| H 2.19643500 -2.83523800 2.25817300   | H 2.62126700 -2.16497500 2.64409200  |
| C 3.12285800 -0.79089000 1.31993700   | C 1.92449100 -2.60826800 0.38558300  |
| C 3.46082700 -1.64598000 0.11148100   | C 2.87580100 -1.56833300 -0.13581400 |
| O 2.68401500 -2.50982500 -0.32690200  | C 4.23854300 -1.77179100 -0.36495800 |
| N 4.69130800 -1.43615900 -0.42355900  | C 4.99935700 -0.72113900 -0.88388200 |
| C 5.05033300 -2.08263600 -1.68060300  | C 4.37865100 0.49403300 -1.18476100  |
| H 4.34641800 -2.89452000 -1.88762400  | C 3.01264700 0.60759400 -0.93993000  |
| H 5.01787500 -1.35615700 -2.51098400  | N 2.29684600 -0.38918000 -0.40252700 |
| H 6.07023600 -2.49040300 -1.61456200  | C 2.17897000 1.80646200 -1.31804700  |
| C 5.57201900 -0.35120800 0.00571700   | O 2.72162000 2.84731300 -1.72107200  |
| H 5.24900700 0.62217100 -0.39819900   | O 0.90860400 1.61227200 -1.20567000  |

|   |             |             |             |   |             |             |             |
|---|-------------|-------------|-------------|---|-------------|-------------|-------------|
| H | 5.62663600  | -0.28742500 | 1.09970300  | H | 4.92476300  | 1.33420700  | -1.61201800 |
| H | 6.58345600  | -0.56419800 | -0.36437100 | H | 6.06823100  | -0.85301700 | -1.06016300 |
| H | 3.78047700  | -1.10932100 | 2.15266500  | H | 4.69070400  | -2.73660000 | -0.13348100 |
| H | 3.38533300  | 0.25026100  | 1.10514800  | H | 2.46503000  | -3.43674400 | 0.87332200  |
| H | 2.28694200  | -0.14792700 | 3.71153400  | H | 1.36200600  | -3.01271300 | -0.46701600 |
| H | 2.11431200  | 1.11350700  | 2.48649200  | H | 0.09935400  | -3.75569800 | 2.09072300  |
| H | -0.05078500 | -0.35022300 | 4.05131600  | H | -0.55613100 | -3.15247300 | 0.54696300  |
| H | 0.32336500  | 1.35939200  | 4.04451600  | H | -1.06550800 | -2.06242400 | 3.35424700  |
| C | -1.09417800 | 2.10813300  | 2.22464400  | H | -2.19635500 | -2.83529600 | 2.25781300  |
| C | 0.09380300  | 2.82549600  | 1.63957100  | C | -3.12282700 | -0.79085600 | 1.31988100  |
| C | 0.47786000  | 4.12830500  | 1.96608200  | C | -3.46082800 | -1.64577600 | 0.11133000  |
| C | 1.59551500  | 4.67772800  | 1.33333500  | O | -2.68405800 | -2.50965500 | -0.32710000 |
| C | 2.29376600  | 3.92104100  | 0.38803700  | N | -4.69129400 | -1.43583100 | -0.42365100 |
| C | 1.84025400  | 2.63282000  | 0.11585700  | C | -5.57201400 | -0.35099400 | 0.00589600  |
| N | 0.77997600  | 2.10707700  | 0.74252400  | H | -5.62642600 | -0.28732500 | 1.09989800  |
| C | 2.45474700  | 1.71709900  | -0.91615700 | H | -5.24913600 | 0.62244700  | -0.39798100 |
| O | 3.47362400  | 2.07435300  | -1.53344800 | H | -6.58350300 | -0.56402000 | -0.36403100 |
| O | 1.83258200  | 0.60109900  | -1.07679900 | C | -5.05048200 | -2.08215900 | -1.68072700 |
| H | 3.16672500  | 4.31107200  | -0.13375500 | H | -5.01845600 | -1.35547800 | -2.51094500 |
| H | 1.92047000  | 5.69043200  | 1.57756100  | H | -4.34638400 | -2.89379000 | -1.88810800 |
| H | -0.08697400 | 4.69372700  | 2.70790100  | H | -6.07025400 | -2.49023200 | -1.61450400 |
| H | -1.38459900 | 2.55062000  | 3.19320400  | H | -3.78042000 | -1.10939800 | 2.15259200  |
| H | -1.94805400 | 2.21498900  | 1.53615000  | H | -3.38534000 | 0.25031700  | 1.10523800  |
| F | 0.05955300  | -1.35605200 | -1.38154900 | F | -0.05959500 | -1.35612200 | -1.38150600 |

**Table S59** Atomic coordinates (x,y,z) of [Sc(OH)(L<sup>012</sup>)] isomers.

| [Sc(OH)(L <sup>012</sup> )] Δ         | [Sc(OH)(L <sup>012</sup> )] Δ        |
|---------------------------------------|--------------------------------------|
| Sc 0.00000000 0.00000000 0.00000000   | Sc 0.00000000 0.00000000 0.00000000  |
| N -0.86374700 0.66652700 2.36029700   | N -1.66643000 -0.80456800 1.80574100 |
| C 0.18700100 0.50225100 3.40591200    | C -1.29488100 -2.14958600 2.35877900 |
| C 1.58927800 0.22597000 2.87988900    | C -0.17281800 -2.86080600 1.61277300 |
| N 1.66640800 -0.80453200 1.80570700   | N 0.99551500 -1.99661900 1.36864400  |
| C 1.29487800 -2.14958300 2.35869300   | C 1.70835500 -1.63351700 2.62168900  |
| C 0.17282900 -2.86079900 1.61266200   | C 2.04456000 -0.15001300 2.69300800  |
| N -0.99552200 -1.99662100 1.36855200  | N 0.86369700 0.66656800 2.36031100   |
| C -1.70838700 -1.63357700 2.62160800  | C -0.18705900 0.50228100 3.40591700  |
| C -2.04460600 -0.15007600 2.69297000  | C -1.58932500 0.22597300 2.87988400  |
| H -2.42116400 0.08634500 3.70666100   | H -2.21561300 -0.08137200 3.73902700 |
| H -2.84070600 0.10666700 1.98336300   | H -2.02928100 1.14403800 2.47910400  |
| H -1.08879100 -1.92419400 3.47795000  | H 0.11789200 -0.30028000 4.08611300  |
| H -2.64113500 -2.21260300 2.71549000  | H -0.24219800 1.41108700 4.02687200  |
| C -1.93915500 -2.64816900 0.44473700  | C 1.24283200 2.08402400 2.22369900   |
| C -2.86876000 -1.61301200 -0.12259000 | C 0.08513500 2.86194900 1.65949500   |
| C -4.23631500 -1.80662400 -0.33234400 | C -0.20300000 4.19225000 1.97696100  |
| C -4.99153600 -0.76524200 -0.87598900 | C -1.30259600 4.80382300 1.37145300  |
| C -4.36106800 0.43443800 -1.21490700  | C -2.08229400 4.07622200 0.46780500  |
| C -2.99106200 0.53978000 -0.98969400  | C -1.72136300 2.75716300 0.20411500  |
| N -2.27536200 -0.45196100 -0.43925000 | C -2.44745800 1.86335000 -0.77252000 |
| C -2.16314100 1.73811200 -1.38666600  | O -3.48869800 2.26987200 -1.32203200 |
| O -2.71481300 2.76754400 -1.80692300  | O -1.89938800 0.71602200 -0.95763700 |
| O -0.89191900 1.56001900 -1.26331000  | N -0.67048600 2.17494700 0.79598500  |
| H -4.90360100 1.27136500 -1.65272900  | H -2.94957500 4.51100700 -0.02743400 |
| H -6.06379000 -0.89019400 -1.03614000 | H -1.55246300 5.83981000 1.60640000  |
| H -4.69688200 -2.75717900 -0.06172800 | H 0.42180500 4.73009500 2.69085000   |
| H -1.36318700 -3.08075500 -0.38455800 | H 2.09109400 2.14723200 1.52206400   |
| H -2.50386700 -3.45910100 0.93603400  | H 1.57231800 2.51649900 3.18523400   |
| H -0.10759200 -3.76497900 2.18796500  | H 2.42110400 0.08643400 3.70669800   |
| H 0.53952800 -3.18099800 0.63262600   | H 2.84066400 0.10672000 1.98340300   |
| H 1.03069100 -2.02848200 3.41804800   | H 1.08875500 -1.92411200 3.47803900  |
| H 2.17301100 -2.81033200 2.34165600   | H 2.64111400 -2.21252200 2.71561000  |
| C 3.07851200 -0.78368900 1.36714600   | C 1.93915900 -2.64817600 0.44485200  |
| C 3.41158200 -1.62133100 0.14456100   | C 2.86876000 -1.61303800 -0.12251400 |
| O 2.62340100 -2.47246600 -0.31435100  | C 4.23629800 -1.80669600 -0.33232900 |
| N 4.63867900 -1.41925700 -0.38733800  | C 4.99152800 -0.76535500 -0.87604000 |
| C 5.00063900 -2.06129600 -1.64665000  | C 4.36108200 0.43433500 -1.21495800  |
| H 4.26666000 -2.83635000 -1.88635700  | C 2.99109000 0.53972500 -0.98967500  |
| H 5.02185300 -1.31773300 -2.46134200  | N 2.27538100 -0.45197400 -0.43917100 |
| H 5.99970900 -2.51469000 -1.56234200  | C 2.16319300 1.73807000 -1.38665000  |
| C 5.53949600 -0.36032600 0.06593700   | O 2.71486400 2.76747300 -1.80697200  |
| H 5.23592900 0.62424100 -0.32548700   | O 0.89196500 1.56000200 -1.26326000  |

|   |             |             |             |   |             |             |             |
|---|-------------|-------------|-------------|---|-------------|-------------|-------------|
| H | 5.58749900  | -0.31526400 | 1.16089800  | H | 4.90361800  | 1.27123300  | -1.65283100 |
| H | 6.54814500  | -0.58759500 | -0.30264800 | H | 6.06376900  | -0.89035000 | -1.03624200 |
| H | 3.73312600  | -1.11981600 | 2.19527800  | H | 4.69684900  | -2.75725900 | -0.06171200 |
| H | 3.34911200  | 0.25728400  | 1.16396600  | H | 2.50388100  | -3.45908700 | 0.93617500  |
| H | 2.21555800  | -0.08140000 | 3.73902900  | H | 1.36320300  | -3.08079400 | -0.38443500 |
| H | 2.02923200  | 1.14405300  | 2.47914600  | H | 0.10761600  | -3.76496300 | 2.18810600  |
| H | -0.11793900 | -0.30031800 | 4.08610100  | H | -0.53951100 | -3.18104600 | 0.63274800  |
| H | 0.24211600  | 1.41105400  | 4.02687500  | H | -1.03068900 | -2.02843600 | 3.41812900  |
| C | -1.24289400 | 2.08398200  | 2.22369800  | H | -2.17300100 | -2.81035300 | 2.34176900  |
| C | -0.08519900 | 2.86192500  | 1.65951500  | C | -3.07852500 | -0.78376100 | 1.36714600  |
| C | 0.20290600  | 4.19223000  | 1.97700200  | C | -3.41153400 | -1.62143200 | 0.14456200  |
| C | 1.30249500  | 4.80382900  | 1.37151000  | O | -2.62330800 | -2.47254700 | -0.31431000 |
| C | 2.08221300  | 4.07625200  | 0.46785900  | N | -4.63860500 | -1.41938400 | -0.38740400 |
| C | 1.72131600  | 2.75718900  | 0.20415100  | C | -5.53950100 | -0.36051700 | 0.06585600  |
| N | 0.67044400  | 2.17494500  | 0.79601200  | H | -5.58750900 | -0.31543700 | 1.16081500  |
| C | 2.44743400  | 1.86340100  | -0.77249100 | H | -5.23600800 | 0.62406800  | -0.32558500 |
| O | 3.48865000  | 2.26997200  | -1.32201400 | H | -6.54813300 | -0.58786400 | -0.30272700 |
| O | 1.89941500  | 0.71605000  | -0.95759200 | C | -5.00050600 | -2.06143100 | -1.64672600 |
| H | 2.94948600  | 4.51106300  | -0.02737200 | H | -5.02207500 | -1.31778800 | -2.46133300 |
| H | 1.55234500  | 5.83981800  | 1.60646800  | H | -4.26628900 | -2.83620700 | -1.88660000 |
| H | -0.42191700 | 4.73005300  | 2.69089000  | H | -5.99941000 | -2.51518400 | -1.56235300 |
| H | -1.57240000 | 2.51643900  | 3.18523400  | H | -3.73315300 | -1.11988700 | 2.19526600  |
| H | -2.09115200 | 2.14718700  | 1.52205700  | H | -3.34914000 | 0.25720400  | 1.16393300  |
| O | 0.23816000  | -1.42369700 | -1.34807700 | O | -0.23808800 | -1.42372500 | -1.34808200 |
| H | 1.09545700  | -1.85033700 | -1.15022300 | H | -1.09535900 | -1.85040400 | -1.15019900 |

**Table S60** Atomic coordinates (x,y,z) of [Sc(L<sup>003</sup>)] isomers.

| [Sc(L <sup>003</sup> )] Δ            | [Sc(L <sup>003</sup> )] Λ             |
|--------------------------------------|---------------------------------------|
| Sc 0.00000000 0.00000000 0.00000000  | Sc 0.00000000 0.00000000 0.00000000   |
| O 0.82720600 -1.41901300 -1.47600200 | O -0.82682800 -1.41938800 -1.47574300 |
| C 2.06448300 -1.75604100 -1.59519800 | C -2.06406100 -1.75646100 -1.59516800 |
| O 2.49621900 -2.68817700 -2.29395700 | O -2.49563600 -2.68851700 -2.29413500 |
| C 3.01599900 -0.88333900 -0.82008300 | C -3.01574800 -0.88393600 -0.82004900 |
| C 4.39767500 -0.90158600 -0.99517300 | C -4.39741700 -0.90253900 -0.99510400 |
| H 4.84708600 -1.62784400 -1.67119700 | C -5.16157800 0.03863800 -0.30147000  |
| C 5.16160600 0.03978500 -0.30155600  | C -4.52006200 0.95964900 0.52880800   |
| C 4.51987300 0.96061000 0.52876200   | C -3.13059100 0.89921400 0.65729600   |
| H 5.08181600 1.71811200 1.07594700   | N -2.40838800 -0.02315500 0.00704100  |
| C 3.13042600 0.89981100 0.65728900   | C -2.31725200 1.84992700 1.48758100   |
| N 2.40844100 -0.02272300 0.00701500  | N -1.18483800 1.11721600 2.07818000   |
| C 2.31686800 1.85032400 1.48758800   | C -1.70454700 0.15113800 3.09560000   |
| N 1.18459800 1.11737600 2.07815700   | H -1.12897900 0.27556900 4.02011200   |
| C 1.70446800 0.15137200 3.09558000   | H -2.74394100 0.40615500 3.35542200   |
| H 1.12884800 0.27564300 4.02008300   | C -1.66274500 -1.30802000 2.65820800  |
| H 2.74380300 0.40658800 3.35543400   | N -0.36214800 -1.64887500 2.05944800  |
| C 1.66298700 -1.30778400 2.65816500  | C 0.71812600 -1.62712600 3.09042700   |
| N 0.36247700 -1.64887800 2.05937900  | H 0.31003400 -1.19760300 4.01259600   |
| C -0.71779100 -1.62735600 3.09035000 | H 1.01283900 -2.65730900 3.34704200   |
| H -0.30974500 -1.19774500 4.01250400 | C 1.96578500 -0.85892300 2.67339000   |
| H -1.01227900 -2.65760100 3.34697900 | N 1.62303200 0.44286600 2.07674800    |
| C -1.96560100 -0.85942700 2.67329400 | C 1.05880600 1.36674100 3.10634700    |
| N -1.62315500 0.44245600 2.07669200  | H 1.80001400 2.14095900 3.36115900    |
| C -1.05911500 1.36646800 3.10626000  | H 0.89338700 0.80062600 4.03027200    |
| H -1.80048200 2.14055300 3.36104600  | C -0.23307000 2.06036900 2.69140500   |
| H -0.89358900 0.80044800 4.03022000  | H -0.03661700 2.85277100 1.96144600   |
| C 0.23263500 2.06034000 2.69136100   | H -0.67244100 2.54251500 3.58570300   |
| H 0.03606300 2.85272200 1.96141400   | C 2.81124700 1.05706900 1.46737600    |
| H 0.67187300 2.54256000 3.58568400   | H 3.56120400 1.34905600 2.22379000    |
| C -2.81149800 1.05637300 1.46733500  | H 3.28349400 0.32083900 0.79810600    |
| H -3.56152500 1.34819200 2.22375100  | C 2.38215600 2.24521400 0.65538500    |
| H -3.28362100 0.32005800 0.79806500  | N 1.20491900 2.09724400 0.03284900    |
| C -2.38267700 2.24463200 0.65537300  | C 0.75516300 3.06667600 -0.77587300   |
| N -1.20533700 2.09701000 0.03294800  | C 1.43705400 4.26780900 -0.95479400   |
| C -0.75580600 3.06657500 -0.77573800 | C 2.65215500 4.44138700 -0.28836100   |
| C -1.43802700 4.26751200 -0.95470700 | C 3.13807900 3.41221200 0.51958600    |
| C -2.65324700 4.44072400 -0.28838900 | H 4.08888100 3.50527600 1.04524500    |
| C -3.13894200 3.41139900 0.51950000  | H 3.22021200 5.36588700 -0.40377000   |
| H -4.08983100 3.50415400 1.04505000  | H 1.02379500 5.02975600 -1.61438500   |
| H -3.22157800 5.36504500 -0.40386100 | C -0.49330200 2.70185000 -1.53542500  |
| H -1.02493600 5.02957800 -1.61425900 | O -1.08385000 3.55657900 -2.21715000  |
| C 0.49277000 2.70206800 -1.53523900  | O -0.83446900 1.46529700 -1.42536700  |

|   |             |             |             |   |             |             |             |
|---|-------------|-------------|-------------|---|-------------|-------------|-------------|
| O | 1.08317900  | 3.55697300  | -2.21685900 | H | 2.54494300  | -1.42179400 | 1.93349300  |
| O | 0.83415700  | 1.46555400  | -1.42531000 | H | 2.61125700  | -0.73157100 | 3.56390600  |
| H | -2.54460600 | -1.42241900 | 1.93337200  | C | -0.40740900 | -2.97462600 | 1.42527700  |
| H | -2.61113900 | -0.73226600 | 3.56379700  | H | -0.51311900 | -3.78618100 | 2.16667300  |
| C | 0.40801100  | -2.97459000 | 1.42512300  | H | -1.28229900 | -3.01501400 | 0.75785300  |
| H | 0.51394000  | -3.78616200 | 2.16646200  | C | 0.83696300  | -3.15980900 | 0.60365200  |
| H | 1.28289000  | -3.01472700 | 0.75767900  | C | 1.51389900  | -4.37393700 | 0.46919300  |
| C | -0.83632900 | -3.15999200 | 0.60351300  | C | 2.64820300  | -4.42825400 | -0.34306300 |
| N | -1.25555100 | -2.05298500 | -0.02560500 | C | 3.06165500  | -3.27576100 | -1.01473800 |
| C | -2.31915200 | -2.11059700 | -0.83793400 | C | 2.31958400  | -2.11017700 | -0.83784200 |
| C | -3.06105200 | -3.27630300 | -1.01478800 | N | 1.25603200  | -2.05272800 | -0.02543100 |
| C | -2.64740700 | -4.42872400 | -0.34311300 | C | 2.57922900  | -0.83495700 | -1.59760900 |
| C | -1.51309900 | -4.37421500 | 0.46912900  | O | 3.61753700  | -0.70760800 | -2.26886900 |
| H | -1.15330200 | -5.25636000 | 0.99955600  | O | 1.63946800  | 0.03871500  | -1.49617900 |
| H | -3.19846500 | -5.36371600 | -0.45655600 | H | 3.92697800  | -3.26937600 | -1.67624800 |
| H | -3.92639300 | -3.27005400 | -1.67627100 | H | 3.19940900  | -5.36315900 | -0.45652900 |
| C | -2.57908200 | -0.83538300 | -1.59761900 | H | 1.15424200  | -5.25615600 | 0.99959900  |
| O | -3.61741800 | -0.70820700 | -2.26886600 | H | -2.43819900 | -1.51853900 | 1.91369900  |
| O | -1.63949800 | 0.03846400  | -1.49613700 | H | -1.87590400 | -1.94229400 | 3.54035500  |
| H | 2.43851600  | -1.51813700 | 1.91368400  | H | -2.94217400 | 2.33509700  | 2.25754900  |
| H | 1.87623900  | -1.94202100 | 3.54031800  | H | -1.91941000 | 2.64083600  | 0.83278400  |
| H | 2.94167700  | 2.33563400  | 2.25755900  | H | -5.08219700 | 1.71700300  | 1.07600700  |
| H | 1.91886100  | 2.64116000  | 0.83279200  | H | -6.24691600 | 0.06056100  | -0.41229500 |
| H | 6.24693200  | 0.06201100  | -0.41241900 | H | -4.84665400 | -1.62893300 | -1.67110200 |

**Table S61** Atomic coordinates (x,y,z) of [ScF(L<sup>003</sup>)]<sup>-</sup> isomers.

| [ScF(L <sup>003</sup> )] <sup>-</sup> Δ |             |             |             | [ScF(L <sup>003</sup> )] <sup>-</sup> Λ |             |             |             |
|-----------------------------------------|-------------|-------------|-------------|-----------------------------------------|-------------|-------------|-------------|
| Sc                                      | 0.00000000  | 0.00000000  | 0.00000000  | Sc                                      | 0.00000000  | 0.00000000  | 0.00000000  |
| F                                       | -0.01769400 | -0.20135900 | -1.91641700 | O                                       | 1.97325800  | 0.62047400  | -0.41883900 |
| N                                       | -1.36818400 | 1.23087700  | 3.69626700  | C                                       | 3.07784400  | -0.01142800 | -0.21424800 |
| C                                       | -2.10668600 | 0.10568300  | 4.24868300  | O                                       | 4.17140000  | 0.29988600  | -0.71151000 |
| C                                       | -1.19855200 | -1.03869200 | 4.73278800  | C                                       | 2.99360300  | -1.18703400 | 0.73333900  |
| N                                       | -0.18479600 | -1.44954500 | 3.76328600  | C                                       | 4.13416000  | -1.93770700 | 1.02029500  |
| C                                       | 1.17306400  | -1.50187300 | 4.28707100  | C                                       | 4.02872700  | -2.97285200 | 1.94556900  |
| C                                       | 1.72889300  | -0.13000100 | 4.70844700  | C                                       | 2.80223200  | -3.17996100 | 2.57387200  |
| N                                       | 1.57010400  | 0.92352900  | 3.70663500  | C                                       | 1.70358600  | -2.37399200 | 2.24853500  |
| C                                       | 0.93411700  | 2.13753000  | 4.19861400  | N                                       | 1.79545400  | -1.41550800 | 1.30345300  |
| C                                       | -0.52163800 | 1.93729500  | 4.65508900  | C                                       | 0.41187100  | -2.51378500 | 3.02262600  |
| H                                       | -0.52708800 | 1.38258400  | 5.60368000  | N                                       | 0.13587900  | -1.32723100 | 3.82018900  |
| H                                       | -0.93509700 | 2.93619300  | 4.89922400  | C                                       | 1.18015300  | -0.97760200 | 4.78068000  |
| H                                       | 0.97049600  | 2.87627600  | 3.38751500  | H                                       | 0.70310900  | -0.63792200 | 5.71062600  |
| H                                       | 1.48842900  | 2.58861700  | 5.05471700  | H                                       | 1.78078500  | -1.86279000 | 5.06811000  |
| C                                       | 2.76142200  | 1.18862000  | 2.91650800  | C                                       | 2.15094300  | 0.10950000  | 4.28700100  |
| H                                       | 3.60304900  | 1.58217000  | 3.52768500  | N                                       | 1.47545700  | 1.27612100  | 3.73825300  |
| H                                       | 2.51388400  | 1.96418200  | 2.17574900  | C                                       | 0.68101400  | 2.03110300  | 4.70551900  |
| C                                       | 3.25375900  | -0.04238300 | 2.18690300  | H                                       | 0.65967500  | 1.47407300  | 5.65230900  |
| N                                       | 2.40599700  | -0.67813700 | 1.35761700  | H                                       | 1.15858600  | 3.00132700  | 4.94786600  |
| C                                       | 2.80572000  | -1.82186400 | 0.77967500  | C                                       | -0.76249000 | 2.32650100  | 4.26381300  |
| C                                       | 4.08201600  | -2.36382900 | 0.95510500  | N                                       | -1.49004300 | 1.16020200  | 3.78096900  |
| C                                       | 4.97585900  | -1.69060400 | 1.78423800  | C                                       | -1.68949500 | 0.10992500  | 4.78163800  |
| C                                       | 4.54921700  | -0.52388300 | 2.41758500  | H                                       | -2.75692900 | 0.02611400  | 5.06360700  |
| H                                       | 5.20572200  | 0.01251900  | 3.10365900  | H                                       | -1.16908600 | 0.39731200  | 5.70644500  |
| H                                       | 5.98216800  | -2.07828900 | 1.95271000  | C                                       | -1.21872000 | -1.29280400 | 4.35324500  |
| H                                       | 4.34381600  | -3.29499100 | 0.45563500  | H                                       | -1.88505500 | -1.67809100 | 3.57124300  |
| C                                       | 1.77656800  | -2.55732000 | -0.04847200 | H                                       | -1.34500400 | -1.96497700 | 5.23398700  |
| O                                       | 2.08296900  | -3.62783900 | -0.59856800 | C                                       | -2.68657100 | 1.52162700  | 3.03905600  |
| O                                       | 0.60320600  | -2.02393400 | -0.09881500 | H                                       | -3.47072900 | 1.97647200  | 3.68329800  |
| H                                       | 2.79421600  | -0.27152600 | 4.97576600  | H                                       | -2.40638700 | 2.28209300  | 2.29231600  |
| H                                       | 1.23759400  | 0.18825800  | 5.63897600  | C                                       | -3.30083800 | 0.34215000  | 2.31746100  |
| H                                       | 1.80827600  | -1.92994300 | 3.50089300  | N                                       | -2.51262400 | -0.38249400 | 1.50516200  |
| H                                       | 1.26332200  | -2.18052800 | 5.16724900  | C                                       | -3.02141900 | -1.47858500 | 0.92193200  |
| C                                       | -0.53902300 | -2.61673400 | 2.97230900  | C                                       | -4.35236100 | -1.87874600 | 1.07275000  |
| H                                       | -0.66032700 | -3.53331200 | 3.58980600  | C                                       | -5.18327500 | -1.11018900 | 1.88489300  |
| H                                       | 0.27576700  | -2.80385400 | 2.25977900  | C                                       | -4.64473800 | 0.00440400  | 2.52728100  |
| C                                       | -1.82087500 | -2.40449300 | 2.19785800  | H                                       | -5.25141800 | 0.60974800  | 3.20189300  |
| N                                       | -1.87188300 | -1.41188100 | 1.28659400  | H                                       | -6.22854700 | -1.38682800 | 2.03393800  |
| C                                       | -3.04737400 | -1.14884500 | 0.68832500  | H                                       | -4.70507000 | -2.77765600 | 0.56981100  |
| C                                       | -4.20930300 | -1.88657800 | 0.92068300  | C                                       | -2.06550800 | -2.32892400 | 0.11456400  |
| H                                       | -5.12710900 | -1.61661100 | 0.40115000  | O                                       | -2.47271300 | -3.37950200 | -0.40597000 |
| C                                       | -4.15012600 | -2.94376800 | 1.82509200  | O                                       | -0.84474300 | -1.91116900 | 0.04048600  |

|   |             |             |             |   |             |             |             |
|---|-------------|-------------|-------------|---|-------------|-------------|-------------|
| C | -2.94411400 | -3.19322600 | 2.47804000  | H | -0.75661200 | 3.06457900  | 3.45045400  |
| H | -2.86471000 | -3.98621300 | 3.22219300  | H | -1.27463100 | 2.81733400  | 5.12459800  |
| H | -5.03282600 | -3.54999900 | 2.03579800  | C | 2.32195100  | 2.09377500  | 2.88458700  |
| C | -3.07724900 | 0.04680400  | -0.23526200 | H | 3.08863900  | 2.66254300  | 3.45461700  |
| O | -4.13887100 | 0.37051200  | -0.79050200 | H | 2.85794900  | 1.42624700  | 2.19383900  |
| O | -1.96201600 | 0.68230100  | -0.35920800 | C | 1.50588400  | 3.07818800  | 2.07657000  |
| H | -0.69508100 | -0.73012900 | 5.65956500  | C | 1.66757700  | 4.45681500  | 2.26595600  |
| H | -1.84925000 | -1.88746800 | 5.02171600  | C | 0.84272000  | 5.34824500  | 1.58038000  |
| H | -2.77814300 | -0.26292700 | 3.46192900  | C | -0.13547100 | 4.83277400  | 0.73367800  |
| H | -2.75981100 | 0.39934200  | 5.10350200  | C | -0.22315800 | 3.44467600  | 0.59029000  |
| C | -2.16838200 | 2.09263000  | 2.84330000  | N | 0.58691200  | 2.58553800  | 1.22672000  |
| H | -2.91161700 | 2.69399800  | 3.41129700  | C | -1.30264900 | 2.84802800  | -0.28433800 |
| H | -2.73063200 | 1.45389700  | 2.14619000  | O | -2.12850200 | 3.59448700  | -0.83250800 |
| C | -1.30413700 | 3.04495800  | 2.04623100  | O | -1.31177700 | 1.56085000  | -0.39127800 |
| N | -0.38963700 | 2.52602600  | 1.20497400  | H | -0.82993700 | 5.47342700  | 0.19272800  |
| C | 0.45272400  | 3.36293000  | 0.57899000  | H | 0.94893400  | 6.42543600  | 1.72088800  |
| C | 0.40665200  | 4.75226500  | 0.72533400  | H | 2.42318400  | 4.81672000  | 2.96522900  |
| C | -0.56541700 | 5.29531000  | 1.56126400  | H | 2.79381400  | -0.29856100 | 3.49551800  |
| C | -1.42396200 | 4.42772600  | 2.23545600  | H | 2.82714200  | 0.36490700  | 5.13587500  |
| H | -2.17725500 | 4.80907300  | 2.92567400  | H | 0.47969000  | -3.43754000 | 3.63746700  |
| H | -0.64298300 | 6.37497700  | 1.70135300  | H | -0.41542400 | -2.64476000 | 2.31337500  |
| H | 1.12478400  | 5.37188800  | 0.19114000  | H | 2.68858100  | -3.94943300 | 3.33780400  |
| C | 1.51363600  | 2.73164300  | -0.29224500 | H | 4.89311100  | -3.59110100 | 2.19377300  |
| O | 2.39018300  | 3.44504000  | -0.80597800 | H | 5.07241100  | -1.69422900 | 0.52463600  |
| O | 1.44330100  | 1.45204500  | -0.43740300 | F | -0.03662400 | -0.27326700 | -1.90414100 |



**Table S62** Atomic coordinates (x,y,z) of [Sc(OH)(L<sup>003</sup>)]<sup>-</sup> isomers.

| [Sc(OH)(L <sup>003</sup> )] <sup>-</sup> Δ | [Sc(OH)(L <sup>003</sup> )] <sup>-</sup> Λ |
|--------------------------------------------|--------------------------------------------|
| Sc 0.00000000 0.00000000 0.00000000        | Sc 0.00000000 0.00000000 0.00000000        |
| O 0.68415200 1.12232400 -1.48921600        | O 1.88426100 0.89076900 -0.35538900        |
| H 0.15253100 1.93218900 -1.55768000        | C 3.04877400 0.38903100 -0.12375500        |
| N 0.02349300 0.06021200 3.98251200         | O 4.10736900 0.79768400 -0.62653600        |
| C -1.26352500 0.33217100 4.61382200        | C 3.07939800 -0.75260700 0.86594600        |
| C -2.16953900 -0.89698300 4.80626400       | C 4.29720700 -1.33962800 1.21089600        |
| N -2.45602200 -1.67167700 3.59718900       | C 4.29937100 -2.33920400 2.17956300        |
| C -2.12404900 -3.08912900 3.66958500       | C 3.09073600 -2.67548200 2.78505700        |
| C -0.64152700 -3.39918300 3.93393000       | C 1.90649000 -2.03650200 2.39453600        |
| N 0.31250400 -2.66426000 3.11041000        | N 1.90003200 -1.10986900 1.41137700        |
| C 1.38661600 -2.03445400 3.86195100        | C 0.62453900 -2.33615600 3.13865600        |
| C 0.87854900 -0.86723300 4.72490900        | N 0.14130400 -1.17921900 3.87897900        |
| H 0.31654900 -1.26785500 5.57968700        | C 1.08893100 -0.63659200 4.85093500        |
| H 1.75332500 -0.35418700 5.16679400        | H 0.53977000 -0.35399100 5.75995600        |
| H 2.12618500 -1.66663000 3.14010500        | H 1.82012300 -1.40163200 5.17739800        |
| H 1.92361500 -2.74767300 4.52806700        | C 1.87480000 0.58196600 4.33956400         |
| C 0.72948300 -3.32949900 1.88593700        | N 1.02359700 1.59622100 3.73601400         |
| H 1.17346000 -4.33213000 2.06849800        | C 0.08752400 2.23692100 4.65858300         |
| H 1.49112500 -2.70539100 1.40268300        | H 0.13636000 1.71716300 5.62551700         |
| C -0.43555300 -3.49330100 0.93555100       | H 0.38745300 3.28157700 4.87462500         |
| N -0.93614500 -2.39387600 0.33213700       | C -1.37518500 2.26991600 4.18116400        |
| C -2.08518200 -2.51194800 -0.36046800      | N -1.88849500 0.98098900 3.73736500        |
| C -2.75934200 -3.72211200 -0.52751800      | C -1.91987700 -0.05294200 4.77201000       |
| C -2.19444900 -4.87451500 0.01384500       | H -2.96116300 -0.30985700 5.04745600       |
| C -1.02214000 -4.75241600 0.75695300       | H -1.46866500 0.34905000 5.69050600        |
| H -0.56757300 -5.62119000 1.23385400       | C -1.20961800 -1.36431100 4.39267300       |
| H -2.67014700 -5.84735800 -0.12130200      | H -1.78553200 -1.87917000 3.61348600       |
| H -3.69291700 -3.73919700 -1.08745600      | H -1.23311800 -2.02510600 5.29055000       |
| C -2.63354500 -1.24679300 -0.97833800      | C -3.11548100 1.09830200 2.96550000        |
| O -3.80995700 -1.21674300 -1.36841100      | H -3.98319500 1.41772400 3.58359400        |
| O -1.80115200 -0.26376500 -1.07031700      | H -2.96404600 1.87859600 2.20201200        |
| H -0.51221400 -4.49514300 3.81986600       | C -3.48654900 -0.19297600 2.26653100       |
| H -0.41710600 -3.18804300 4.98882300       | N -2.56140600 -0.76894600 1.48137800       |
| H -2.42685400 -3.53340700 2.71173900       | C -2.83752900 -1.95152200 0.91329400       |
| H -2.70782100 -3.62407600 4.45605600       | C -4.07154000 -2.59507700 1.05252400       |
| C -3.78878400 -1.45712400 3.05956300       | C -5.04635800 -1.98713700 1.84101500       |
| H -4.59277900 -1.69059200 3.79182200       | C -4.74362000 -0.77839700 2.46843300       |
| H -3.92444200 -2.15071000 2.21207800       | H -5.46674700 -0.29011900 3.12306600       |
| C -4.01144900 -0.05616000 2.52824700       | H -6.02092900 -2.45770800 1.98359300       |
| N -3.00812400 0.49473100 1.83561800        | H -4.23948600 -3.55286400 0.56246100       |
| C -3.15818000 1.72529000 1.33144800        | C -1.71684800 -2.62009400 0.14429700       |
| C -4.34387700 2.45703100 1.45788200        | O -1.93127600 -3.70290900 -0.42700900      |
| H -4.42083400 3.45050900 1.01811000        | O -0.57030400 -2.02843700 0.16648800       |

|   |             |             |             |   |             |             |             |
|---|-------------|-------------|-------------|---|-------------|-------------|-------------|
| C | -5.39512200 | 1.88631600  | 2.17649500  | H | -1.47420300 | 2.96701000  | 3.33815500  |
| C | -5.22409800 | 0.61785900  | 2.73197300  | H | -1.97914700 | 2.70291600  | 5.01322200  |
| H | -6.01609700 | 0.15022200  | 3.31937500  | C | 1.74364600  | 2.51528300  | 2.86798500  |
| H | -6.33184100 | 2.42964900  | 2.31520600  | H | 2.39571900  | 3.21965200  | 3.42932000  |
| C | -1.95477000 | 2.33172500  | 0.63922500  | H | 2.39203200  | 1.92081300  | 2.20726100  |
| O | -2.09988900 | 3.36489800  | -0.03669700 | C | 0.78785500  | 3.32109200  | 2.01862300  |
| O | -0.81912000 | 1.74664600  | 0.83841800  | C | 0.68081700  | 4.70787500  | 2.18337400  |
| H | -1.72871000 | -1.56058700 | 5.56511800  | C | -0.28923300 | 5.41327900  | 1.47142700  |
| H | -3.10974900 | -0.52606900 | 5.25803000  | C | -1.14080800 | 4.70590000  | 0.62641400  |
| H | -1.78310500 | 1.06589200  | 3.98334300  | C | -0.95273300 | 3.32643400  | 0.50011300  |
| H | -1.14158100 | 0.80311600  | 5.61788800  | N | 0.00004000  | 2.65021300  | 1.15883600  |
| C | 0.69478000  | 1.28662900  | 3.56258000  | C | -1.87557900 | 2.51597400  | -0.38050800 |
| H | 0.97481100  | 1.92987500  | 4.42449100  | O | -2.86474800 | 3.06238600  | -0.89469100 |
| H | -0.00075800 | 1.85334500  | 2.92964500  | O | -1.57733100 | 1.27035600  | -0.53212400 |
| C | 1.95543500  | 1.00258700  | 2.77624600  | H | -1.94068800 | 5.19175500  | 0.06999800  |
| N | 1.86967100  | 0.34679700  | 1.59772700  | H | -0.39250500 | 6.49315100  | 1.59190800  |
| C | 3.01165600  | -0.03832100 | 0.98744900  | H | 1.34301400  | 5.21701200  | 2.88450700  |
| C | 4.27929800  | 0.27961700  | 1.47060800  | H | 2.59565900  | 0.26292400  | 3.57435400  |
| C | 4.37388600  | 1.01377200  | 2.65051000  | H | 2.47730600  | 0.97682400  | 5.19038700  |
| C | 3.19917900  | 1.35864900  | 3.31432600  | H | 0.81104800  | -3.21394500 | 3.79475800  |
| H | 3.23127800  | 1.88964100  | 4.26571200  | H | -0.14792300 | -2.61909100 | 2.41290100  |
| H | 5.34648500  | 1.28842400  | 3.06211700  | H | 3.05294100  | -3.42011100 | 3.58052900  |
| H | 5.15771800  | -0.06077100 | 0.92508500  | H | 5.22759500  | -2.83008400 | 2.47695500  |
| C | 2.86519500  | -0.91051800 | -0.24232300 | H | 5.20930500  | -0.99749600 | 0.72499100  |
| O | 3.87810700  | -1.29633100 | -0.84409300 | O | -0.00536300 | -0.35699700 | -1.95882200 |
| O | 1.65215200  | -1.22213400 | -0.55784200 | H | 0.57804100  | -1.10302700 | -2.17546000 |

## 5 References

- (1) Vaughn, B. A.; Koller, A. J.; Chen, Z.; Ahn, S. H.; Loveless, C. S.; Cingoranelli, S. J.; Yang, Y.; Cirri, A.; Johnson, C. J.; Lapi, S. E.; et al. Homologous Structural, Chemical, and Biological Behavior of Sc and Lu Complexes of the Picaga Bifunctional Chelator: Toward Development of Matched Theranostic Pairs for Radiopharmaceutical Applications. *Bioconjugate Chemistry* **2021**, *32* (7), 1232-1241.
- (2) Whetter, J. N.; Vaughn, B. A.; Koller, A. J.; Boros, E. An Unusual Pair: Facile Formation and In Vivo Validation of Robust Sc–<sup>18</sup>F Ternary Complexes for Molecular Imaging. *Angewandte Chemie International Edition* **2022**, *61* (7), e202114203.
- (3) *APEX3*; Bruker-AXS: Madison, WI, USA, 2019. (accessed).
- (4) Krause, L.; Herbst-Irmer, R.; Sheldrick, G. M.; Stalke, D. Comparison of silver and molybdenum microfocus X-ray sources for single-crystal structure determination. *J. Appl. Crystallogr.* **2015**, *48* (Pt 1), 3-10. DOI: 10.1107/S1600576714022985.
- (5) *XPREP*; Georg-August-Universität Göttingen, Göttingen, Germany, 2013. (accessed).
- (6) Sheldrick, G. M. *The SHELX homepage*. 2013. <http://shelx.uni-ac.gwdg.de/SHELX/> (accessed).
- (7) Dolomanov, O. V.; Bourhis, L. J.; Gildea, R. J.; Howard, J. a. K.; Puschmann, H. OLEX2: A Complete Structure Solution, Refinement and Analysis Program. *J. Appl. Crystallogr.* **2009**, *42*, 339–341.
- (8) Guzei, I. A. Programs *Gn*. University of Wisconsin-Madison, Madison, Wisconsin, USA, 2007-2022.
